# Supplementary material for: Effect of trade on global aquatic food consumption patterns
Source: Nat Commun. 2024 Feb 15;15:1412. doi: 10.1038/s41467-024-45556-w (PMC10869811; doi:10.1038/s41467-024-45556-w)
Supplement: Supplementary file 4 — Supplementary Data 1 [file 41467_2024_45556_MOESM4_ESM.xlsx]

## Sheet: Sheet1
Country	Commodity Name	Trade flow	Commodity	Preservation method	Portion/form	Simplified Commodity	Taxon	Integrated conversion factor	Total production	1976	1977	1978	1979	1980	1981	1982	1983	1984	1985	1986	1987	1988	1989	1990	1991	1992	1993	1994	1995	1996	1997	1998	1999	2000	2001	2002	2003	2004	2005	2006	2007	2008	2009	2010	2011	2012	2013	2014	2015
Afghanistan	Seabass, frozen	Imports	Seabass	Frozen	NA	Seabass	Fish	1	7575.69	0	0	0	0	0	0	0	0	0	0	0	0	0	0	0	0	0	0	0	0	0	0	0	0	0	0	0	0	0	0	0	0	0	0	0	0	0	0	0	0
Albania	Anchovies (Engraulis spp), fresh or chilled	Imports	Anchovies (Engraulis spp)	Live, fresh or chilled	NA	Anchovies (Engraulis spp)	Fish	1	8781.18	0	0	0	0	0	0	0	0	0	0	0	0	0	0	0	0	0	0	0	0	0	0	0	0	28	0	0	0	0	1	0	82	13	0	337	0	95	128	512	2272
Albania	Anchovies, Indian mackerels, seerfishes, jacks, crevalles, silver pomfrets, Pacific saury, scads, capelin, Kawakawa, bonitos, marlins, sailfishes, spearfish, frozen	Exports	Anchovies, Indian mackerels, seerfishes, jacks, crevalles, silver pomfrets, Pacific saury, scads, capelin, Kawakawa, bonitos, marlins, sailfishes, spearfish	Frozen	NA	Anchovies and Indian mackerels and seerfishes	Fish	1	134.11	0	0	0	0	0	0	0	0	0	0	0	0	0	0	0	0	0	0	0	0	0	0	0	0	0	0	0	0	0	0	0	0	0	0	0	0	0	0	0	0
Albania	Anchovies, Indian mackerels, seerfishes, jacks, crevalles, silver pomfrets, Pacific saury, scads, capelin, Kawakawa, bonitos, marlins, sailfishes, spearfish, frozen	Imports	Anchovies, Indian mackerels, seerfishes, jacks, crevalles, silver pomfrets, Pacific saury, scads, capelin, Kawakawa, bonitos, marlins, sailfishes, spearfish	Frozen	NA	Anchovies and Indian mackerels and seerfishes	Fish	1	2218.35	0	0	0	0	0	0	0	0	0	0	0	0	0	0	0	0	0	0	0	0	0	0	0	0	0	0	0	0	0	0	0	0	0	0	0	0	0	0	0	0
Albania	Anchovies minced, prepared or preserved	Exports	Anchovy	Prepared or preserved	Minced	Anchovy	Fish	2.66	1337.16	0	0	0	0	0	0	0	0	0	0	0	0	0	0	0	0	0	0	0	0	0	0	0	0	0	0	0	0	0	0	0	0	15.96	0	21.28	0	111.72	0	0	0
Albania	Anchovies nei, dried, whether or not salted, but not smoked	Imports	Anchovy	Dried	NA	Anchovy	Fish	2.82	377.88	0	0	0	0	0	0	0	0	0	0	0	0	0	0	0	0	0	0	0	0	0	0	0	0	107.16	109.98	0	0	0	0	0	0	0	0	104.34	0	56.4	0	0	0
Albania	Anchovies, prepared or preserved, not minced	Exports	Anchovy	Prepared or preserved	NA	Anchovy	Fish	2.66	137410	0	0	0	0	0	0	0	0	0	0	0	0	0	0	0	0	0	0	0	13.3	300.58	1681.12	2617.44	4154.92	3319.68	3700.06	4287.92	5740.28	6152.58	10.64	34.58	5.32	0	5708.36	5955.74	6266.96	7309.68	10789	11424.7	12363.7
Albania	Anchovies, prepared or preserved, not minced	Imports	Anchovy	Prepared or preserved	NA	Anchovy	Fish	2.66	57383.8	0	0	0	0	0	0	0	0	0	0	0	0	0	0	0	0	0	0	0	5.32	106.4	29.26	13.3	590.52	0	98.42	63.84	0	5947.76	8421.56	3242.54	5008.78	4740.12	4391.66	9192.96	6080.76	1864.66	2101.4	1274.14	1697.08
Albania	Anchovies, prepared or preserved, not minced	Reexports	Anchovy	Prepared or preserved	NA	Anchovy	Fish	2.66	27387.4	0	0	0	0	0	0	0	0	0	0	0	0	0	0	0	0	0	0	0	0	0	0	0	0	0	0	0	0	0	6035.54	9860.62	6051.5	5439.7	0	0	0	0	0	0	0
Albania	Anchovies, salted or in brine	Exports	Anchovy	Salted	NA	Anchovy	Fish	2.82	15706.8	0	0	0	0	0	0	0	0	0	0	0	0	0	0	0	0	0	0	0	0	778.32	70.5	569.64	115.62	95.88	183.3	0	0	0	0	0	0	36.66	149.46	239.7	372.24	637.32	772.68	1412.82	2078.34
Albania	Anchovies, salted or in brine	Reexports	Anchovy	Salted	NA	Anchovy	Fish	2.82	507.6	0	0	0	0	0	0	0	0	0	0	0	0	0	0	0	0	0	0	0	0	0	0	0	0	0	0	0	0	0	0	236.88	217.14	53.58	0	0	0	0	0	0	0
Albania	Atlantic cod, frozen	Imports	Atlantic cod	Frozen	NA	Atlantic cod	Fish	1	150	0	0	0	0	0	0	0	0	0	0	0	0	0	0	0	0	0	0	0	1	0	0	0	0	0	0	0	16	1	25	48	39	20	0	0	0	0	0	0	0
Albania	Atlantic mackerel, fresh or chilled	Imports	Atlantic mackerel	Live, fresh or chilled	NA	Atlantic mackerel	Fish	1	132	0	0	0	0	0	0	0	0	0	0	0	0	0	0	0	0	0	0	0	0	0	0	0	2	0	5	16	33	4	0	20	0	10	2	35	5	0	0	0	0
Albania	Atlantic and Danube salmons, fresh or chilled	Imports	Atlantic salmon and Danube salmon	Live, fresh or chilled	NA	Atlantic salmon and Danube salmon	Fish	1	731.28	0	0	0	0	0	0	0	0	0	0	0	0	0	0	0	0	0	0	0	0	0	0	0	0	0	0	0	0	0	0	0	0	0	0	0	0	12	13	34	98
Albania	Brisling or sprats, fresh or chilled	Imports	Brisling or sprats	Live, fresh or chilled	NA	Brisling or sprats	Fish	1	199	0	0	0	0	0	0	0	0	0	0	0	0	0	0	0	0	0	0	0	0	0	0	0	0	26	75	90	0	0	0	0	0	0	0	0	0	0	0	5	2
Albania	Cape hake, fresh or chilled	Exports	Cape hake	Live, fresh or chilled	NA	Cape hake	Fish	1	303	0	0	0	0	0	0	0	0	0	0	0	0	0	0	0	0	0	0	0	0	0	0	0	0	2	1	6	0	1	0	0	0	0	0	293	0	0	0	0	0
Albania	Catfish fillets, frozen	Imports	Catfish	Frozen	Fillets	Catfish	Fish	1.25	162.5	0	0	0	0	0	0	0	0	0	0	0	0	0	0	0	0	0	0	0	0	0	0	0	0	0	0	0	0	0	0	0	0	0	0	0	0	7.5	18.75	28.75	7.5
Albania	Cephalopods nei, dried, salted or in brine, smoked	Imports	Cephalopod	Dried	NA	Cephalopod	Cephalopod	2.82	1895.04	0	0	0	0	0	0	0	0	0	0	0	0	0	0	0	0	0	0	0	0	0	0	0	0	0	0	0	0	14.1	0	112.8	169.2	0	0	394.8	0	56.4	0	290.46	366.6
Albania	Cuttle fish "Sepia officinalis" and "Rossia macrosoma", with or without shell, frozen	Imports	Cuttlefish	Frozen	NA	Cephalopod	Cephalopod	1	365.22	0	0	0	0	0	0	0	0	0	0	0	0	0	0	0	0	0	0	0	0	0	0	0	0	0	0	0	0	0	0	0	0	0	0	0	0	0	0	0	0
Albania	Cuttlefishes, frozen	Exports	Cuttlefish	Frozen	NA	Cephalopod	Cephalopod	1	3930	0	0	0	0	0	0	0	0	0	0	0	0	0	0	0	0	0	0	0	10	0	24	0	1	0	0	0	0	0	0	0	0	0	148	0	566	0	827	796	699
Albania	Cuttlefishes, frozen	Imports	Cuttlefish	Frozen	NA	Cephalopod	Cephalopod	1	826	0	0	0	0	0	0	0	0	0	0	0	0	0	0	0	0	0	0	0	9	0	0	0	0	0	25	22	0	5	4	16	19	38	0	110	0	158	0	88	183
Albania	Cuttlefish and squid, other than live, fresh or chilled	Exports	Cuttlefish and squid	Live, fresh or chilled	NA	Cephalopod	Cephalopod	1	828	0	0	0	0	0	0	0	0	0	0	0	0	0	0	0	0	0	0	0	0	0	0	0	0	0	0	0	0	0	0	5	10	0	0	218	0	595	0	0	0
Albania	Cuttlefish and squid, other than live, fresh or chilled	Imports	Cuttlefish and squid	Live, fresh or chilled	NA	Cephalopod	Cephalopod	1	3551	0	0	0	0	0	0	0	0	0	0	0	0	0	0	0	0	0	0	0	0	2	0	0	5	0	0	0	0	0	0	0	0	5	551	0	1506	11	1466	0	3
Albania	Cuttlefish and squid, prepared or preserved	Exports	Cuttlefish and squid	Prepared or preserved	NA	Cephalopod	Cephalopod	2.66	466.085	0	0	0	0	0	0	0	0	0	0	0	0	0	0	0	0	0	0	0	0	0	0	0	0	0	0	0	0	0	0	0	0	0	0	0	0	0	0	0	0
Albania	Cuttlefishes and squids, dried, salted or in brine, smoked nei	Exports	Cuttlefish and squid	Dried	NA	Cephalopod	Cephalopod	2.82	311.666	0	0	0	0	0	0	0	0	0	0	0	0	0	0	0	0	0	0	0	0	0	0	0	0	0	0	0	0	0	0	0	0	0	0	0	0	0	0	0	0
Albania	Cuttlefishes and squids, dried, salted or in brine, smoked nei	Imports	Cuttlefish and squid	Dried	NA	Cephalopod	Cephalopod	2.82	2356.7	0	0	0	0	0	0	0	0	0	0	0	0	0	0	0	0	0	0	0	0	0	0	0	0	0	0	0	0	0	0	0	0	0	0	0	0	0	0	0	0
Albania	Cuttlefishes and squids, frozen, nei	Exports	Cuttlefish and squid	Frozen	NA	Cephalopod	Cephalopod	1	3017.04	0	0	0	0	0	0	0	0	0	0	0	0	0	0	0	0	0	0	0	0	0	0	0	0	0	0	0	0	0	0	0	0	0	0	0	0	0	0	0	0
Albania	Cuttlefishes and squids, frozen, nei	Imports	Cuttlefish and squid	Frozen	NA	Cephalopod	Cephalopod	1	792.46	0	0	0	0	0	0	0	0	0	0	0	0	0	0	0	0	0	0	0	0	0	0	0	0	0	0	0	0	0	0	0	0	0	0	0	0	0	0	0	0
Albania	Cuttlefishes and squids, live, fresh or chilled, nei	Exports	Cuttlefish and squid	Live, fresh or chilled	NA	Cephalopod	Cephalopod	1	741.08	0	0	0	0	0	0	0	0	0	0	0	0	0	0	0	0	0	0	0	3	0	0	0	2	0	0	0	0	0	0	2	9	0	197	437	78	6	0	0	0
Albania	Cuttlefishes and squids, live, fresh or chilled, nei	Imports	Cuttlefish and squid	Live, fresh or chilled	NA	Cephalopod	Cephalopod	1	502.88	0	0	0	0	0	0	0	0	0	0	0	0	0	0	0	0	0	0	0	0	0	1	0	12	18	0	17	0	33	7	1	43	120	39	12	6	2	69	15	22
Albania	Cuttlefishes and squids, live, fresh or chilled, nei	Reexports	Cuttlefish and squid	Live, fresh or chilled	NA	Cephalopod	Cephalopod	1	163	0	0	0	0	0	0	0	0	0	0	0	0	0	0	0	0	0	0	0	0	0	0	0	0	0	0	0	0	0	0	5	0	158	0	0	0	0	0	0	0
Albania	Octopus, frozen	Imports	Octopus	Frozen	NA	Cephalopod	Cephalopod	1	798.03	0	0	0	0	0	0	0	0	0	0	0	0	0	0	0	0	0	0	0	0	0	0	0	0	1	1	18	40	37	7	17	0	2	0	15	0	42	0	118	84
Albania	Octopus, other than live, fresh or chilled	Imports	Octopus	Live, fresh or chilled	NA	Cephalopod	Cephalopod	1	198.12	0	0	0	0	0	0	0	0	0	0	0	0	0	0	0	0	0	0	0	0	0	0	0	0	0	0	0	0	0	0	0	0	0	15	0	68	0	38	0	48
Albania	Squids (Illex spp.), frozen	Imports	Squid	Frozen	NA	Cephalopod	Cephalopod	1	302.04	0	0	0	0	0	0	0	0	0	0	0	0	0	0	0	0	0	0	0	0	0	0	0	0	0	0	0	0	0	1	2	6	26	0	26	0	5	0	5	87
Albania	Squids (Ommastrephes sagittatus, Loligo spp.), frozen	Imports	Squid	Frozen	NA	Cephalopod	Cephalopod	1	11109.6	0	0	0	0	0	0	0	0	0	0	0	0	0	0	0	0	0	0	0	0	0	0	0	0	0	1	1	0	8	46	177	316	476	0	987	0	1144	0	1209	1017
Albania	Squids (Ommastrephes sagittatus, Loligo spp.), frozen	Reexports	Squid	Frozen	NA	Cephalopod	Cephalopod	1	570	0	0	0	0	0	0	0	0	0	0	0	0	0	0	0	0	0	0	0	0	0	0	0	0	0	0	0	0	0	0	48	199	323	0	0	0	0	0	0	0
Albania	Cods nei, dried, whether or not salted	Imports	Cod	Dried	NA	Cod	Fish	2.82	764.276	0	0	0	0	0	0	0	0	0	0	0	0	0	0	0	0	0	0	0	0	0	0	0	0	0	0	0	0	0	0	0	0	0	0	0	0	0	0	0	0
Albania	Cods nei, frozen	Imports	Cod	Frozen	NA	Cod	Fish	1	270.06	0	0	0	0	0	0	0	0	0	0	0	0	0	0	0	0	0	0	0	0	28	6	1	17	0	7	2	0	8	3	29	8	31	21	73	22	10	0	0	2
Albania	Cods, fresh or chilled, nei	Exports	Cod	Live, fresh or chilled	NA	Cod	Fish	1	521	0	0	0	0	0	0	0	0	0	0	0	0	0	0	0	0	0	0	0	83	90	3	0	1	2	57	0	34	56	71	39	22	2	19	25	14	0	3	0	0
Albania	Gadiformes nei, frozen	Imports	Cod and hake and haddock	Frozen	NA	Cod and hake and haddock	Fish	1	144.92	0	0	0	0	0	0	0	0	0	0	0	0	0	0	0	0	0	0	0	0	0	0	0	0	0	0	0	0	0	0	0	0	0	0	0	0	23	11	7	6
Albania	Gadiformes, fresh or chilled, nei	Exports	Cod and hake and haddock	Live, fresh or chilled	NA	Cod and hake and haddock	Fish	1	909.2	0	0	0	0	0	0	0	0	0	0	0	0	0	0	0	0	0	0	0	0	0	0	0	0	0	0	0	0	0	0	0	0	0	0	0	0	627	93	121	26
Albania	Gadiformes, fresh or chilled, nei	Imports	Cod and hake and haddock	Live, fresh or chilled	NA	Cod and hake and haddock	Fish	1	2254.72	0	0	0	0	0	0	0	0	0	0	0	0	0	0	0	0	0	0	0	0	0	0	0	0	0	0	0	0	0	0	0	0	0	0	0	0	751	704	274	155
Albania	Crabs nei, frozen	Exports	Crab	Frozen	NA	Crustacean	Crustacean	1	116.95	0	0	0	0	0	0	0	0	0	0	0	0	0	0	0	0	0	0	0	0	3	0	0	0	0	58	5	3	0	0	0	0	0	0	0	0	0	0	0	0
Albania	Crabs, peeled or not, live, fresh or chilled, nei	Imports	Crab	Live, fresh or chilled	NA	Crustacean	Crustacean	1	215	0	0	0	0	0	0	0	0	0	0	0	0	0	0	0	0	0	0	0	0	0	0	0	0	0	0	0	0	0	0	90	103	22	0	0	0	0	0	0	0
Albania	Crustaceans nei, dried, salted or in brine, smoked	Exports	Crustaceans	Dried	NA	Crustacean	Crustacean	2.54	1234.9	0	0	0	0	0	0	0	0	0	0	0	0	0	0	0	0	0	0	0	0	0	0	0	0	0	0	0	0	0	0	0	0	0	0	0	0	0	0	0	0
Albania	Crustaceans and molluscs, nei, frozen	Exports	Crustaceans and molluscs	Frozen	NA	Crustacean	Crustacean	1	4552	0	0	0	0	0	0	0	0	0	0	283	693	998	702	1740	0	0	76	60	0	0	0	0	0	0	0	0	0	0	0	0	0	0	0	0	0	0	0	0	0
Albania	Deepwater rose shrimps (Parapenaeus longirostris), frozen	Exports	Deepwater rose shrimps (Parapenaeus longirostris)	Frozen	NA	Crustacean	Crustacean	1	154.75	0	0	0	0	0	0	0	0	0	0	0	0	0	0	0	0	0	0	0	0	0	0	0	0	0	0	0	0	0	0	0	0	0	0	1	0	4	0	0	0
Albania	Deepwater rose shrimps (Parapenaeus longirostris), frozen	Imports	Deepwater rose shrimps (Parapenaeus longirostris)	Frozen	NA	Crustacean	Crustacean	1	135.92	0	0	0	0	0	0	0	0	0	0	0	0	0	0	0	0	0	0	0	0	0	0	0	0	1	0	0	0	0	0	0	0	7	0	4	0	0	0	1	3
Albania	Norway lobsters (Nephrops spp.), nei, even smoked, frozen	Imports	Norway lobster (Nephrops norvegicus)	Smoked	NA	Crustacean	Crustacean	2	331	0	0	0	0	0	0	0	0	0	0	0	0	0	0	0	0	0	0	0	0	0	0	0	0	0	0	0	0	0	0	2	0	0	0	6	0	24	20	30	26
Albania	Shrimps and prawns, frozen, nei	Exports	Shrimps and prawns	Frozen	NA	Crustacean	Crustacean	1	298	0	0	0	0	0	0	0	0	0	0	0	0	0	0	0	0	0	0	0	22	0	2	4	0	0	0	0	0	0	0	4	2	0	97	29	88	0	0	50	0
Albania	Shrimps and prawns, frozen, nei	Imports	Shrimps and prawns	Frozen	NA	Crustacean	Crustacean	1	807	0	0	0	0	0	0	0	0	0	0	0	0	0	0	0	0	0	10	10	1	0	0	2	15	1	0	0	1	1	16	34	26	56	120	84	430	0	0	0	0
Albania	Shrimps and prawns, not frozen, nei	Imports	Shrimps and prawns	NA	NA	Crustacean	Crustacean	1	177	0	0	0	0	0	0	0	0	0	0	0	0	0	0	0	0	0	0	0	0	0	0	0	0	0	0	0	0	0	0	0	0	31	55	47	40	0	0	0	0
Albania	Shrimps and prawns, other than coldwater, even smoked, frozen	Exports	Shrimps and prawns	Smoked	NA	Crustacean	Crustacean	2	3138.6	0	0	0	0	0	0	0	0	0	0	0	0	0	0	0	0	0	0	0	0	0	0	0	0	0	0	0	0	0	0	0	0	0	0	0	0	154	16	0	346
Albania	Shrimps and prawns, other than coldwater, even smoked, frozen	Imports	Shrimps and prawns	Smoked	NA	Crustacean	Crustacean	2	10588.5	0	0	0	0	0	0	0	0	0	0	0	0	0	0	0	0	0	0	0	0	0	0	0	0	0	0	0	0	0	0	0	0	0	0	0	0	768	722	1116	1518
Albania	Shrimps and prawns, prep. or pres., in airtight containers	Exports	Shrimps and prawns	Prepared or preserved	NA	Crustacean	Crustacean	2.27	2774.33	0	0	0	0	0	0	0	0	0	0	0	0	0	0	0	0	0	0	0	0	0	0	0	0	0	0	0	0	0	0	0	0	0	0	0	0	0	0	0	0
Albania	Shrimps and prawns, prep. or pres., not in airtight containers	Exports	Shrimps and prawns	Prepared or preserved	NA	Crustacean	Crustacean	2.27	12767.5	0	0	0	0	0	0	0	0	0	0	0	0	0	0	0	0	0	0	0	0	0	0	0	0	0	0	0	0	0	0	0	0	0	0	0	0	4.54	4.54	0	0
Albania	Cold-water shrimps and prawns (Pandalus spp., Crangon crangon), frozen, even smoked, whether in shell or not	Exports	Shrimps and prawns (Pandalus spp.)	Smoked	In shell or not	Crustacean	Crustacean	2.42	427.566	0	0	0	0	0	0	0	0	0	0	0	0	0	0	0	0	0	0	0	0	0	0	0	0	0	0	0	0	0	0	0	0	0	0	0	0	0	0	0	0
Albania	Cold-water shrimps and prawns (Pandalus spp., Crangon crangon), frozen, even smoked, whether in shell or not	Imports	Shrimps and prawns (Pandalus spp.)	Smoked	In shell or not	Crustacean	Crustacean	2.42	47318.2	0	0	0	0	0	0	0	0	0	0	0	0	0	0	0	0	0	0	0	0	0	0	0	0	0	0	0	0	0	0	0	0	0	0	0	0	16.94	0	0	41.14
Albania	Shrimps and prawns (Penaeus spp.), frozen	Imports	Shrimps and prawns (Penaeus spp.)	Frozen	NA	Crustacean	Crustacean	1	201	0	0	0	0	0	0	0	0	0	0	0	0	0	0	0	0	0	0	0	0	0	0	0	0	0	0	0	0	0	3	13	17	40	0	128	0	0	0	0	0
Albania	Eels and elvers live	Exports	Eels	Live, fresh or chilled	NA	Eels	Fish	1	138	0	0	0	0	0	0	0	0	0	0	0	0	0	0	0	0	0	0	0	21	0	7	4	6	7	8	13	0	9	28	29	3	2	1	0	0	0	0	0	0
Albania	Eels, fresh or chilled	Exports	Eels	Live, fresh or chilled	NA	Eels	Fish	1	137	0	0	0	0	0	0	0	0	0	0	0	0	0	0	0	0	0	0	0	15	7	9	6	0	1	0	0	12	21	9	16	10	15	16	0	0	0	0	0	0
Albania	European anchovy, salted	Imports	European anchovy	Salted	NA	European anchovy	Fish	2.82	217119	0	0	0	0	0	0	0	0	0	0	0	0	0	0	0	0	0	0	0	0	1892.22	3995.94	4819.38	3942.36	7464.54	8302.08	11875	13936.4	6463.44	2876.4	8696.88	5927.64	7876.26	9748.74	2752.32	7918.56	8584.08	9359.58	12233.2	15431
Albania	European sardine , fresh or chilled	Imports	European pilchard	Live, fresh or chilled	NA	European pilchard	Fish	1	767	0	0	0	0	0	0	0	0	0	0	0	0	0	0	0	0	0	0	0	2	0	0	0	0	35	20	14	32	17	189	275	43	65	0	75	0	0	0	0	0
Albania	European sardine, prepared or preserved, not minced, in oil	Imports	European sardine	Prepared or preserved	Heads-off and gutted	European sardine	Fish	2.66	3126.27	0	0	0	0	0	0	0	0	0	0	0	0	0	0	0	0	0	0	0	638.4	0	0	0	0	0	18.62	0	143.64	401.66	422.94	250.04	196.84	236.74	0	247.38	0	164.92	0	164.92	0
Albania	European sardine, prepared or preserved, not minced, nei	Exports	European sardine	Prepared or preserved	NA	European sardine	Fish	2.66	288.876	0	0	0	0	0	0	0	0	0	0	0	0	0	0	0	0	0	0	0	0	0	0	0	0	0	0	0	26.6	0	0	0	0	0	0	13.3	0	13.3	0	0	0
Albania	European sardine, prepared or preserved, not minced, nei	Imports	European sardine	Prepared or preserved	NA	European sardine	Fish	2.66	14550.7	0	0	0	0	0	0	0	0	0	0	0	0	0	0	0	0	0	0	0	45.22	0	0	0	0	0	438.9	321.86	574.56	614.46	1032.08	1497.58	1436.4	1236.9	712.88	239.4	758.1	657.02	0	457.52	718.2
Albania	Euthynnus excl. skipjack or stripe-bellied bonitos, fresh or chilled	Exports	Euthynnus other than skipjack	Live, fresh or chilled	NA	Euthynnus other than skipjack	Fish	1	229	0	0	0	0	0	0	0	0	0	0	0	0	0	0	0	0	0	0	0	0	0	0	0	0	12	1	8	44	36	40	32	17	13	0	1	0	25	0	0	0
Albania	Euthynnus excl. skipjack or stripe-bellied bonitos, fresh or chilled	Imports	Euthynnus other than skipjack	Live, fresh or chilled	NA	Euthynnus other than skipjack	Fish	1	1890.41	0	0	0	0	0	0	0	0	0	0	0	0	0	0	0	0	0	0	0	0	0	0	0	0	4	0	1	7	0	0	0	0	0	0	1	0	865	0	190	297
Albania	Euthynnus excl. skipjack or stripe-bellied bonitos, frozen	Imports	Euthynnus other than skipjack	Frozen	NA	Euthynnus other than skipjack	Fish	1	429	0	0	0	0	0	0	0	0	0	0	0	0	0	0	0	0	0	0	0	0	0	0	0	0	0	24	29	35	91	107	33	52	57	0	1	0	0	0	0	0
Albania	Fish dried, whether or not salted, nei	Imports	Fish	Dried	NA	Fish	Fish	2.82	313.048	0	0	0	0	0	0	0	0	0	0	0	0	0	0	0	0	0	0	0	0	0	0	0	0	0	0	0	0	0	0	0	0	0	188.94	0	124.08	0	0	0	0
Albania	Fish fillets, dried, salted or in brine, nei	Exports	Fish	Dried	Fillets	Fish	Fish	2.82	10932.4	0	0	0	0	0	0	0	0	0	0	0	0	0	0	0	0	0	0	0	0	78.96	0	0	0	0	0	0	0	0	0	0	0	0	383.52	265.08	527.34	0	0	219.96	1271.82
Albania	Fish fillets, dried, salted or in brine, nei	Imports	Fish	Dried	Fillets	Fish	Fish	2.82	567.892	0	0	0	0	0	0	0	0	0	0	0	0	0	0	0	0	0	0	0	0	411.72	0	0	11.28	0	2.82	0	0	0	0	0	8.46	0	14.1	0	50.76	0	0	33.84	0
Albania	Fish fillets, dried, salted or in brine, nei	Reexports	Fish	Dried	Fillets	Fish	Fish	2.82	496.32	0	0	0	0	0	0	0	0	0	0	0	0	0	0	0	0	0	0	0	0	0	0	0	0	0	0	0	0	0	0	8.46	121.26	366.6	0	0	0	0	0	0	0
Albania	Fish fillets, fresh or chilled, nei	Imports	Fish	Live, fresh or chilled	Fillets	Fish	Fish	1.25	142.45	0	0	0	0	0	0	0	0	0	0	0	0	0	0	0	0	0	0	0	0	5	0	0	0	12.5	0	0	0	0	0	0	0	3.75	33.75	5	17.5	0	0	0	0
Albania	Fish fillets, frozen, nei	Exports	Fish	Frozen	Fillets	Fish	Fish	1.25	397.525	0	0	0	0	0	0	0	0	0	0	0	0	0	0	0	0	0	0	0	0	0	0	0	0	0	0	0	0	0	0	0	0	0	0	0	0	0	0	0	33.75
Albania	Fish fillets, frozen, nei	Imports	Fish	Frozen	Fillets	Fish	Fish	1.25	135.762	0	0	0	0	0	0	0	0	0	0	0	0	0	0	0	0	0	0	0	0	0	0	36.25	15	0	0	0	0	0	0	1.25	0	2.5	10	6.25	31.25	0	0	0	0
Albania	Fish live, nei	Imports	Fish	Live, fresh or chilled	NA	Fish	Fish	1	672.56	0	0	0	0	0	0	0	0	0	0	0	0	0	0	0	0	0	0	0	0	5	1	0	55	0	0	0	0	0	0	0	0	0	206	0	15	14	7	11	20
Albania	Fish meat, whether or not minced, frozen, nei	Imports	Fish	Frozen	Meat	Fish	Fish	1.25	265	0	0	0	0	0	0	0	0	0	0	0	0	0	0	0	0	0	0	0	0	0	0	152.5	53.75	0	1.25	0	0	0	0	0	0	0	0	0	2.5	6.25	1.25	16.25	6.25
Albania	Fish minced nei, prepared or preserved	Exports	Fish	Prepared or preserved	Minced	Fish	Fish	2.66	379.928	0	0	0	0	0	0	0	0	0	0	0	0	0	0	0	0	0	0	0	29.26	0	0	0	0	0	0	0	0	0	0	0	0	0	101.08	18.62	21.28	2.66	23.94	15.96	0
Albania	Fish nei, prepared or preserved, not minced	Imports	Fish	Prepared or preserved	NA	Fish	Fish	2.66	421.158	0	0	0	0	0	0	0	0	0	0	0	0	0	0	0	0	0	0	0	0	0	0	0	0	0	0	0	0	0	0	0	0	0	0	0	0	0	0	37.24	5.32
Albania	Fish nei, salted or in brine	Imports	Fish	Salted	NA	Fish	Fish	2.82	2377.26	0	0	0	0	0	0	0	0	0	0	0	0	0	0	0	0	0	0	0	42.3	70.5	0	163.56	265.08	0	197.4	160.74	59.22	50.76	0	0	0	143.82	313.02	16.92	5.64	118.44	2.82	0	174.84
Albania	Fish, fresh or chilled, nei	Exports	Fish	Live, fresh or chilled	NA	Fish	Fish	1	763.51	0	0	0	0	0	0	0	0	0	0	0	0	0	0	0	0	0	0	0	0	0	0	0	0	0	0	0	0	0	0	0	0	0	0	0	0	86	151	93	86
Albania	Fish, fresh or chilled, nei	Imports	Fish	Live, fresh or chilled	NA	Fish	Fish	1	4333.25	0	0	0	0	0	0	0	0	0	0	0	0	0	0	0	0	0	0	0	0	0	0	0	0	0	0	0	0	0	0	0	0	0	0	0	0	86	1139	738	496
Albania	Fish, frozen, nei	Exports	Fish	Frozen	NA	Fish	Fish	1	1052.24	0	0	0	0	0	0	0	0	0	0	0	0	0	0	0	0	0	0	0	0	0	0	0	0	0	0	0	0	0	0	0	0	0	0	0	0	40	136	96	197
Albania	Fish, frozen, nei	Imports	Fish	Frozen	NA	Fish	Fish	1	2260.81	0	0	0	0	0	0	0	0	0	0	0	0	0	0	0	0	0	0	0	0	0	0	0	0	0	0	0	0	0	0	0	0	0	0	0	0	72	255	494	182
Albania	Flatfish nei, frozen	Imports	Flatfish	Frozen	NA	Flatfish	Fish	1	395.82	0	0	0	0	0	0	0	0	0	0	0	0	0	0	0	0	0	0	0	2	13	2	2	2	0	4	13	1	3	19	21	4	10	5	30	66	35	70	22	0
Albania	Flatfish, fresh or chilled, nei	Exports	Flatfish	Live, fresh or chilled	NA	Flatfish	Fish	1	2832.38	0	0	0	0	0	0	0	0	0	0	0	0	0	0	0	0	0	0	0	4	683	239	21	10	0	2	14	2	2	1	2	3	1	9	6	0	12	1	0	0
Albania	Flatfish, fresh or chilled, nei	Imports	Flatfish	Live, fresh or chilled	NA	Flatfish	Fish	1	400.03	0	0	0	0	0	0	0	0	0	0	0	0	0	0	0	0	0	0	0	0	195	2	28	6	4	4	0	5	15	0	0	0	0	7	5	0	64	28	21	1
Albania	Freshwater fish nei, frozen	Exports	Freshwater fish	Frozen	NA	Freshwater fish	Fish	1	153	0	0	0	0	0	0	0	0	0	0	0	0	0	0	0	0	0	0	0	0	0	0	0	0	0	9	13	0	1	30	97	0	3	0	0	0	0	0	0	0
Albania	Freshwater fish, nei, fresh or chilled	Imports	Freshwater fish	Live, fresh or chilled	NA	Freshwater fish	Fish	1	174	0	0	0	0	0	0	0	0	0	0	0	0	0	0	0	0	0	0	0	0	0	0	0	0	21	5	32	69	44	0	1	0	2	0	0	0	0	0	0	0
Albania	Hake nei, fresh or chilled	Exports	Hake	Live, fresh or chilled	NA	Hake	Fish	1	100.45	0	0	0	0	0	0	0	0	0	0	0	0	0	0	0	0	0	0	0	0	0	0	0	0	5	22	28	0	1	8	21	4	1	0	5	0	1	0	0	0
Albania	Hake nei, fresh or chilled	Imports	Hake	Live, fresh or chilled	NA	Hake	Fish	1	481.13	0	0	0	0	0	0	0	0	0	0	0	0	0	0	0	0	0	0	0	0	0	0	0	0	8	1	13	0	0	0	0	1	0	0	348	0	14	35	5	49
Albania	Hakes nei, frozen	Imports	Hake	Frozen	NA	Hake	Fish	1	411.88	0	0	0	0	0	0	0	0	0	0	0	0	0	0	0	0	0	0	0	0	0	0	0	0	0	0	0	0	0	4	21	48	2	50	9	47	36	0	54	25
Albania	Herrings prepared or preserved, not minced, nei	Imports	Herring	Prepared or preserved	NA	Herring	Fish	2.66	293.159	0	0	0	0	0	0	0	0	0	0	0	0	0	0	0	0	0	0	0	0	0	0	0	236.74	2.66	0	0	0	0	0	0	0	0	0	0	18.62	2.66	5.32	10.64	7.98
Albania	Herrings, fresh or chilled, nei	Imports	Herring	Live, fresh or chilled	NA	Herring	Fish	1	795.76	0	0	0	0	0	0	0	0	0	0	0	0	0	0	0	0	0	0	0	0	0	0	0	0	3	4	0	0	0	0	0	0	0	0	0	0	6	4	118	217
Albania	Jack and horse mackerels, fresh or chilled	Imports	Jack and horse mackerel	Live, fresh or chilled	NA	Jack and horse mackerel	Fish	1	220.86	0	0	0	0	0	0	0	0	0	0	0	0	0	0	0	0	0	0	0	0	0	0	0	0	0	0	1	3	10	0	0	1	16	0	1	0	5	16	0	2
Albania	Mackerel prepared or preserved, not minced, nei	Exports	Mackerel	Prepared or preserved	NA	Mackerel	Fish	2.66	951.881	0	0	0	0	0	0	0	0	0	0	0	0	0	0	0	0	0	0	0	0	0	0	0	0	0	0	0	42.56	15.96	0	0	0	0	71.82	55.86	18.62	7.98	0	0	0
Albania	Mackerel prepared or preserved, not minced, nei	Imports	Mackerel	Prepared or preserved	NA	Mackerel	Fish	2.66	8171.84	0	0	0	0	0	0	0	0	0	0	0	0	0	0	0	0	0	0	0	45.22	2.66	0	0	0	0	2.66	31.92	21.28	29.26	26.6	13.3	10.64	71.82	297.92	337.82	425.6	1348.62	774.06	702.24	821.94
Albania	Mackerels nei, frozen	Imports	Mackerel	Frozen	NA	Mackerel	Fish	1	692	0	0	0	0	0	0	0	0	0	0	0	0	0	0	0	0	0	0	0	0	7	0	0	0	4	9	75	11	76	0	20	121	189	108	20	6	0	21	24	1
Albania	Marine fish nei, minced, prepared or preserved	Imports	Marine fish	Prepared or preserved	Minced	Marine fish	Fish	2.66	1579.27	0	0	0	0	0	0	0	0	0	0	0	0	0	0	0	0	0	0	0	0	58.52	13.3	15.96	247.38	2.66	7.98	47.88	15.96	5.32	42.56	15.96	21.28	26.6	140.98	194.18	21.28	2.66	71.82	143.64	45.22
Albania	Marine fish nei, prepared or preserved, not minced	Exports	Marine fish	Prepared or preserved	NA	Marine fish	Fish	2.66	13449	0	0	0	0	0	0	0	0	0	0	1760.92	1377.88	1596	2261	3990	1268.82	452.2	117.04	133	0	0	7.98	0	31.92	7.98	0	0	0	0	0	0	0	0	37.24	2.66	2.66	0	0	66.5	0
Albania	Marine fish nei, prepared or preserved, not minced	Imports	Marine fish	Prepared or preserved	NA	Marine fish	Fish	2.66	3546.15	0	0	0	0	0	0	0	0	0	0	0	0	0	0	0	0	10.64	21.28	26.6	26.6	311.22	2.66	2.66	1851.36	26.6	0	0	0	7.98	47.88	13.3	29.26	276.64	327.18	313.88	236.74	0	7.98	0	0
Albania	Marine fish, fresh or chilled, nei	Exports	Marine fish	Live, fresh or chilled	NA	Marine fish	Fish	1	4766	0	0	0	0	0	0	0	0	0	0	0	0	0	0	0	0	0	0	0	534	129	145	502	385	180	158	185	204	185	234	206	194	233	478	587	227	0	0	0	0
Albania	Marine fish, fresh or chilled, nei	Imports	Marine fish	Live, fresh or chilled	NA	Marine fish	Fish	1	14358	0	0	0	0	0	0	0	0	0	0	0	0	0	0	0	0	8	73	130	220	22	58	598	1657	831	867	965	514	1045	1228	938	736	684	798	901	2085	0	0	0	0
Albania	Marine fish, frozen, nei	Exports	Marine fish	Frozen	NA	Marine fish	Fish	1	4484	0	0	0	0	0	0	291	124	200	0	28	92	190	309	430	680	380	915	650	70	12	5	2	0	1	1	0	38	17	3	0	1	0	31	1	13	0	0	0	0
Albania	Marine fish, frozen, nei	Imports	Marine fish	Frozen	NA	Marine fish	Fish	1	984	0	0	0	0	0	0	0	0	0	0	0	0	0	0	0	0	0	0	0	8	69	77	15	22	28	133	181	61	30	28	42	60	9	118	66	37	0	0	0	0
Albania	Nile perch and snakeheads (Channa spp.), fresh or chilled	Imports	Nile perch (Lates niloticus) and snakeheads (Channa spp.)	Live, fresh or chilled	NA	Nile perch and snakeheads (Channa spp.)	Fish	1	108	0	0	0	0	0	0	0	0	0	0	0	0	0	0	0	0	0	0	0	0	0	0	0	0	0	0	0	0	0	0	0	0	0	0	0	0	25	55	9	0
Albania	Pacific salmons, frozen, nei	Exports	Pacific salmons	Frozen	NA	Pacific salmons	Fish	1	464.56	0	0	0	0	0	0	0	0	0	0	0	0	0	0	0	0	0	0	0	0	0	0	0	0	0	0	0	0	0	3	0	0	0	0	2	0	0	11	3	0
Albania	Miscellaneous pelagic fish nei, prep. or pres., not minced	Imports	Pelagic fish	Prepared or preserved	NA	Pelagic fish	Fish	2.66	737.538	0	0	0	0	0	0	0	0	0	0	0	0	0	0	0	0	0	0	0	0	0	0	0	0	0	5.32	10.64	18.62	13.3	5.32	31.92	63.84	63.84	0	55.86	0	47.88	0	31.92	5.32
Albania	Pilchards(Sardinops spp.) and Sardinellas, fresh or chilled	Imports	Pilchards (Sardinops spp.) and Sardinellas	Live, fresh or chilled	NA	Pilchards (Sardinops spp.) and Sardinellas	Fish	1	13814.9	0	0	0	0	0	0	0	0	0	0	0	0	0	0	0	0	0	0	0	3	175	32	804	538	353	680	509	696	1025	872	990	1569	1590	1534	337	132	151	0	140	147
Albania	Salmon fillets, frozen	Imports	Salmon	Frozen	Fillets	Salmon	Fish	1.25	165.425	0	0	0	0	0	0	0	0	0	0	0	0	0	0	0	0	0	0	0	0	0	0	0	0	0	0	0	0	0	26.25	55	55	27.5	0	0	0	0	0	0	0
Albania	Salmon nei, not minced, prepared or preserved	Reexports	Salmon	Prepared or preserved	NA	Salmon	Fish	2.66	372.4	0	0	0	0	0	0	0	0	0	0	0	0	0	0	0	0	0	0	0	0	0	0	0	0	0	0	0	0	0	47.88	172.9	114.38	37.24	0	0	0	0	0	0	0
Albania	Salmonoids, fresh or chilled, nei	Exports	Salmonids	Live, fresh or chilled	NA	Salmonids	Fish	1	632	0	0	0	0	0	0	0	0	0	0	0	0	0	0	0	0	0	0	0	0	10	49	294	62	12	3	4	8	0	0	2	0	0	0	0	6	5	7	0	5
Albania	Salmonoids, fresh or chilled, nei	Imports	Salmonids	Live, fresh or chilled	NA	Salmonids	Fish	1	223.81	0	0	0	0	0	0	0	0	0	0	0	0	0	0	0	0	0	0	0	0	26	14	2	18	7	61	6	7	0	2	0	0	0	0	1	3	9	1	22	1
Albania	Salmonoids, frozen	Imports	Salmonids	Frozen	NA	Salmonids	Fish	1	427.15	0	0	0	0	0	0	0	0	0	0	0	0	0	0	0	0	0	0	0	1	36	43	42	5	0	26	74	99	29	33	1	0	5	28	0	0	0	0	0	0
Albania	Saltwater fish nei, live	Imports	Saltwater fish	Live, fresh or chilled	NA	Saltwater fish	Fish	1	716	0	0	0	0	0	0	0	0	0	0	0	0	0	0	0	0	0	0	0	1	0	0	0	0	3	0	14	17	7	209	179	140	103	0	43	0	0	0	0	0
Albania	Sardines, sardinellas, brisling or sprats, fresh or chilled	Imports	Sardine, sardinella, sprat	Live, fresh or chilled	NA	Sardine and sardinella and sprat	Fish	1	217	0	0	0	0	0	0	0	0	0	0	0	0	0	0	0	0	0	0	0	0	0	0	0	0	0	0	0	1	0	0	0	0	0	0	0	0	0	216	0	0
Albania	Sardines, sardinellas, brisling or sprats, frozen	Imports	Sardine, sardinella, sprat	Frozen	NA	Sardine and sardinella and sprat	Fish	1	394.68	0	0	0	0	0	0	0	0	0	0	0	0	0	0	0	0	0	0	0	0	47	48	4	6	0	0	0	0	0	0	0	0	0	48	1	58	1	43	67	20
Albania	Sardines, sardinellas, brisling or sprats, prep. or pres., not minced, nei	Exports	Sardine, sardinella, sprat	Prepared or preserved	NA	Sardine and sardinella and sprat	Fish	2.66	430.361	0	0	0	0	0	0	0	0	0	0	0	0	0	0	0	0	0	0	0	0	0	50.54	0	50.54	0	0	0	0	0	0	0	0	0	138.32	0	39.9	34.58	2.66	0	18.62
Albania	Sardines, sardinellas, brisling or sprats, prep. or pres., not minced, nei	Imports	Sardine, sardinella, sprat	Prepared or preserved	NA	Sardine and sardinella and sprat	Fish	2.66	4966.99	0	0	0	0	0	0	0	0	0	0	0	0	0	0	0	0	0	0	0	0	316.54	95.76	26.6	547.96	651.7	26.6	45.22	0	87.78	13.3	21.28	0	0	0	151.62	0	215.46	808.64	183.54	93.1
Albania	Seabass, fresh or chilled	Exports	Seabass	Live, fresh or chilled	NA	Seabass	Fish	1	638.37	0	0	0	0	0	0	0	0	0	0	0	0	0	0	0	0	0	0	0	0	0	0	0	0	0	0	0	0	0	2	11	0	0	0	1	0	7	7	8	17
Albania	Seabass, fresh or chilled	Imports	Seabass	Live, fresh or chilled	NA	Seabass	Fish	1	2932.16	0	0	0	0	0	0	0	0	0	0	0	0	0	0	0	0	0	0	0	0	0	0	0	0	2	2	0	39	46	23	2	0	25	0	217	0	60	84	246	502
Albania	Seabreams nei, fresh or chilled	Exports	Seabreams	Live, fresh or chilled	NA	Seabream	Fish	1	4111.32	0	0	0	0	0	0	0	0	0	0	0	0	0	0	0	0	0	0	0	149	0	0	0	0	0	0	0	0	0	0	0	0	0	0	0	0	58	23	7	44
Albania	Seabreams nei, fresh or chilled	Imports	Seabreams	Live, fresh or chilled	NA	Seabream	Fish	1	895.26	0	0	0	0	0	0	0	0	0	0	0	0	0	0	0	0	0	0	0	0	0	0	0	0	0	0	11	1	0	2	0	0	0	0	3	0	6	29	139	133
Albania	Skipjack prepared or preserved, not minced, nei	Imports	Skipjack tuna	Prepared or preserved	NA	Skipjack tuna	Fish	2.66	1132.1	0	0	0	0	0	0	0	0	0	0	0	0	0	0	0	0	0	0	0	0	0	0	0	0	0	0	0	0	0	0	0	0	0	0	0	0	0	0	0	324.52
Albania	Skipjack, prepared or preserved, whole or in pieces, not minced, in oil	Imports	Skipjack tuna	Prepared or preserved	NA	Skipjack tuna	Fish	2.66	8429.65	0	0	0	0	0	0	0	0	0	0	0	0	0	0	0	0	0	0	0	0	0	0	0	0	0	45.22	183.54	47.88	133	239.4	335.16	430.92	414.96	0	399	0	654.36	0	986.86	587.86
Albania	Sockeye salmon (red salmon)(Oncorhynchus nerka), frozen	Imports	Sockeye salmon	Frozen	NA	Sockeye salmon	Fish	1	114	0	0	0	0	0	0	0	0	0	0	0	0	0	0	0	0	0	0	0	0	0	0	0	0	0	0	0	15	17	1	0	0	0	74	0	7	0	0	0	0
Albania	Toothfish (Dissostichus spp.), frozen	Imports	Toothfish (Dissostichus spp.)	Frozen	NA	Toothfish (Dissostichus spp.)	Fish	1	209	0	0	0	0	0	0	0	0	0	0	0	0	0	0	0	0	0	0	0	0	0	0	0	0	0	0	0	176	11	0	0	0	0	13	9	0	0	0	0	0
Albania	Trouts and chars, fresh or chilled	Exports	Trouts and chars	Live, fresh or chilled	NA	Trout and char	Fish	1	1425.5	0	0	0	0	0	0	0	0	0	0	0	0	0	0	0	0	0	0	0	1	0	0	0	46	5	1	3	2	4	5	54	35	47	48	0	0	1	1	0	0
Albania	Trouts and chars, fresh or chilled	Imports	Trouts and chars	Live, fresh or chilled	NA	Trout and char	Fish	1	439.39	0	0	0	0	0	0	0	0	0	0	0	0	0	0	0	0	0	0	0	0	16	0	0	5	21	12	43	109	56	41	37	42	43	13	0	0	0	0	0	0
Albania	Trouts and chars, frozen	Exports	Trouts and chars	Frozen	NA	Trout and char	Fish	1	318.3	0	0	0	0	0	0	0	0	0	0	0	0	0	0	0	0	0	0	0	0	0	0	0	0	0	12	0	10	0	40	2	0	0	0	0	0	0	0	0	0
Albania	Trouts and chars, frozen	Imports	Trouts and chars	Frozen	NA	Trout and char	Fish	1	160.45	0	0	0	0	0	0	0	0	0	0	0	0	0	0	0	0	0	0	0	0	0	3	0	5	4	3	8	19	0	4	6	3	2	0	0	0	19	10	10	12
Albania	Tuna loins, prepared or preserved	Exports	Tuna	Prepared or preserved	Loins	Tuna	Fish	2.66	3163.43	0	0	0	0	0	0	0	0	0	0	0	0	0	0	0	0	0	0	0	0	0	0	0	0	0	0	0	0	0	0	0	0	0	0	0	0	0	0	0	0
Albania	Tuna loins, prepared or preserved	Imports	Tuna	Prepared or preserved	Loins	Tuna	Fish	2.66	3127.63	0	0	0	0	0	0	0	0	0	0	0	0	0	0	0	0	0	0	0	0	0	0	0	0	0	0	0	0	7.98	29.26	7.98	21.28	23.94	0	0	0	2.66	0	393.68	425.6
Albania	Tunas prepared or preserved, not minced, in oil	Imports	Tuna	Prepared or preserved	NA	Tuna	Fish	2.66	640.741	0	0	0	0	0	0	0	0	0	0	0	0	0	0	0	0	0	0	0	0	0	0	0	0	0	0	0	0	0	0	0	0	0	0	0	0	0	0	0	61.18
Albania	Tunas prepared or preserved, not minced, nei	Exports	Tuna	Prepared or preserved	NA	Tuna	Fish	2.66	2598.85	0	0	0	0	0	0	0	0	0	0	0	0	0	0	0	0	0	0	0	45.22	0	47.88	0	0	0	0	0	0	0	0	0	0	0	0	10.64	85.12	0	212.8	665	670.32
Albania	Tunas prepared or preserved, not minced, nei	Imports	Tuna	Prepared or preserved	NA	Tuna	Fish	2.66	3450.74	0	0	0	0	0	0	0	0	0	0	0	0	0	0	0	0	0	0	0	228.76	15.96	2.66	2.66	79.8	31.92	63.84	26.6	39.9	15.96	13.3	66.5	21.28	10.64	518.7	175.56	848.54	58.52	1045.38	63.84	39.9
Algeria	Alaska pollock fillets, frozen	Imports	Alaska pollock	Frozen	Fillets	Alaska pollock	Fish	1.25	1832.08	0	0	0	0	0	0	0	0	0	0	0	0	0	0	0	0	0	0	0	0	0	0	0	0	0	0	0	0	0	0	0	0	0	0	0	0	110	126.25	205	286.25
Algeria	Alaska pollock, frozen	Imports	Alaska pollock	Frozen	NA	Alaska pollock	Fish	1	113	0	0	0	0	0	0	0	0	0	0	0	0	0	0	0	0	0	0	0	0	0	0	0	0	0	0	0	0	0	0	0	0	0	0	0	0	0	0	0	43
Algeria	Alaska pollock, meat, whether or not minced, frozen	Imports	Alaska pollock	Frozen	Meat	Alaska pollock	Fish	1.25	215	0	0	0	0	0	0	0	0	0	0	0	0	0	0	0	0	0	0	0	0	0	0	0	0	0	0	0	0	0	0	0	0	0	0	0	0	32.5	0	0	0
Algeria	Albacore (=Longfin tuna), frozen, nei	Exports	Albacore	Frozen	NA	Albacore	Fish	1	304	0	0	0	0	0	0	0	0	0	0	0	0	0	0	0	0	304	0	0	0	0	0	0	0	0	0	0	0	0	0	0	0	0	0	0	0	0	0	0	0
Algeria	Albacore (=Longfin tuna), frozen, nei	Imports	Albacore	Frozen	NA	Albacore	Fish	1	64607	0	0	0	0	0	0	0	0	0	0	0	0	0	0	0	0	0	0	0	724	1	0	0	40	51	562	1882	8045	5842	6972	6210	1818	1256	1620	2299	739	2568	2063	3481	5546
Algeria	Anchovies, salted or in brine	Exports	Anchovy	Salted	NA	Anchovy	Fish	2.82	547.08	0	0	0	0	0	0	0	0	0	0	0	0	0	0	0	0	149.46	155.1	59.22	11.28	0	0	0	0	0	0	0	36.66	0	0	0	0	45.12	11.28	0	0	22.56	0	0	0
Algeria	Argentinian hake, frozen	Imports	Argentine hake	Frozen	NA	Argentine hake	Fish	1	988.31	0	0	0	0	0	0	0	0	0	0	0	0	0	0	0	0	0	0	0	0	0	0	0	0	0	0	0	0	0	0	0	0	0	0	0	0	0	0	0	0
Algeria	Atlantic(Thunnus thynnus), Pacific(T.orientalis) bluefin tuna, live	Exports	Atlantic (Thunnus thynnus)and Pacific (Thunnus orientalis) bluefin tuna	Live, fresh or chilled	NA	Atlantic and Pacific bluefin tuna	Fish	1	2580.57	0	0	0	0	0	0	0	0	0	0	0	0	0	0	0	0	0	0	0	0	0	0	0	0	0	0	0	0	0	0	0	0	340	191	0	0	0	183	122	67
Algeria	Atlantic(Thunnus thynnus)and Pacific(Thunnus orientalis)bluefin tuna, fresh or chilled	Exports	Atlantic (Thunnus thynnus)and Pacific (Thunnus orientalis) bluefin tuna	Live, fresh or chilled	NA	Atlantic and Pacific bluefin tuna	Fish	1	447.13	0	0	0	0	0	0	0	0	0	0	0	0	0	0	0	0	0	0	0	0	0	0	0	0	0	0	0	0	0	0	19	14	190	223	0	0	0	0	0	0
Algeria	Atlantic(Thunnus thynnus)and Pacific(Thunnus orientalis)bluefin tuna, frozen	Exports	Atlantic (Thunnus thynnus)and Pacific (Thunnus orientalis) bluefin tuna	Frozen	NA	Atlantic and Pacific bluefin tuna	Fish	1	208.51	0	0	0	0	0	0	0	0	0	0	0	0	0	0	0	0	0	0	0	0	0	0	0	0	0	0	0	0	0	0	0	0	0	0	0	0	0	0	0	0
Algeria	Atlantic and Danube salmons, fresh or chilled	Imports	Atlantic salmon and Danube salmon	Live, fresh or chilled	NA	Atlantic salmon and Danube salmon	Fish	1	425.19	0	0	0	0	0	0	0	0	0	0	0	0	0	0	0	0	0	0	0	0	0	0	0	0	0	0	0	0	0	0	0	0	0	0	0	0	0	2	9	29
Algeria	Blue whitings (Micromesistius poutassou, Micromesistius australis), fresh or chilled	Imports	Blue whitings	Live, fresh or chilled	NA	Blue whitings	Fish	1	6593.09	0	0	0	0	0	0	0	0	0	0	0	0	0	0	0	0	0	0	0	0	0	0	0	0	0	0	0	0	0	0	0	0	0	0	0	0	66	220	693	1009
Algeria	Blue whitings (Micromesistius poutassou, Micromesistius australis), frozen	Imports	Blue whitings	Frozen	NA	Blue whitings	Fish	1	389	0	0	0	0	0	0	0	0	0	0	0	0	0	0	0	0	0	0	0	0	0	0	0	0	0	0	0	0	0	0	0	0	0	0	0	0	10	188	79	0
Algeria	Bonito (Sarda spp.), not minced, prepared or preserved, nei	Imports	Bonito (Sarda spp.)	Prepared or preserved	NA	Bonito (Sarda spp.)	Fish	2.66	1040.06	0	0	0	0	0	0	0	0	0	0	0	0	0	0	0	0	0	0	0	0	0	0	0	0	0	0	0	0	0	0	0	0	0	0	0	0	0	0	0	0
Algeria	Carps, fresh or chilled	Exports	Carps	Live, fresh or chilled	NA	Carps	Fish	1	151.8	0	0	0	0	0	0	0	0	0	0	0	0	0	0	0	0	0	0	0	0	0	0	0	0	0	0	0	0	0	0	0	0	0	0	0	0	4	2	28	2
Algeria	Carps, eels and snakeheads, fillets, fresh or chilled	Imports	Carps, eels and snakeheads	Live, fresh or chilled	Fillets	Carps and eels and snakeheads	Fish	1.25	4482.5	0	0	0	0	0	0	0	0	0	0	0	0	0	0	0	0	0	0	0	0	0	0	0	0	0	0	0	0	0	0	0	0	0	0	0	0	403.75	722.5	986.25	1081.25
Algeria	Carps, eels and snakeheads, fillets, frozen	Imports	Carps, eels and snakeheads	Frozen	Fillets	Carps and eels and snakeheads	Fish	1.25	13097.5	0	0	0	0	0	0	0	0	0	0	0	0	0	0	0	0	0	0	0	0	0	0	0	0	0	0	0	0	0	0	0	0	0	0	0	0	3248.75	6796.25	2027.5	890
Algeria	Catfish fillets, fresh or chilled	Imports	Catfish	Live, fresh or chilled	Fillets	Catfish	Fish	1.25	4483.93	0	0	0	0	0	0	0	0	0	0	0	0	0	0	0	0	0	0	0	0	0	0	0	0	0	0	0	0	0	0	0	0	0	0	0	0	442.5	333.75	570	805
Algeria	Catfish fillets, frozen	Imports	Catfish	Frozen	Fillets	Catfish	Fish	1.25	9121.27	0	0	0	0	0	0	0	0	0	0	0	0	0	0	0	0	0	0	0	0	0	0	0	0	0	0	0	0	0	0	0	0	0	0	0	0	147.5	596.25	913.75	940
Algeria	Catfish, frozen	Imports	Catfish	Frozen	NA	Catfish	Fish	1	100	0	0	0	0	0	0	0	0	0	0	0	0	0	0	0	0	0	0	0	0	0	0	0	0	0	0	0	0	0	0	0	0	0	0	0	0	8	0	34	10
Algeria	Cuttlefish and squid, other than live, fresh or chilled	Exports	Cuttlefish and squid	Live, fresh or chilled	NA	Cephalopod	Cephalopod	1	353	0	0	0	0	0	0	0	0	0	0	0	0	0	0	0	0	2	1	21	5	0	2	0	41	16	81	47	72	5	21	4	18	9	0	1	0	3	0	0	0
Algeria	Cuttlefish and squid, other than live, fresh or chilled	Imports	Cuttlefish and squid	Live, fresh or chilled	NA	Cephalopod	Cephalopod	1	12747	0	0	0	0	0	0	0	0	0	0	0	0	0	0	0	0	0	0	0	10	136	199	178	400	404	414	670	625	463	475	521	768	780	817	609	590	1168	1036	957	959
Algeria	Cuttlefishes and squids, dried, salted or in brine, smoked nei	Imports	Cuttlefish and squid	Dried	NA	Cephalopod	Cephalopod	2.82	2024.76	0	0	0	0	0	0	0	0	0	0	0	0	0	0	0	0	0	0	0	0	0	0	0	0	0	0	0	0	0	0	0	0	0	0	0	0	0	0	0	0
Algeria	Cuttlefishes and squids, frozen, nei	Imports	Cuttlefish and squid	Frozen	NA	Cephalopod	Cephalopod	1	2126.38	0	0	0	0	0	0	0	0	0	0	0	0	0	0	0	0	0	0	0	0	0	0	0	0	0	0	0	0	0	0	0	0	0	0	0	0	0	0	0	0
Algeria	Cuttlefishes and squids, live, fresh or chilled, nei	Imports	Cuttlefish and squid	Live, fresh or chilled	NA	Cephalopod	Cephalopod	1	247.04	0	0	0	0	0	0	0	0	0	0	0	0	0	0	0	0	0	0	0	0	0	1	0	3	2	0	0	0	0	0	0	0	0	5	15	19	27	71	54	34
Algeria	Octopus, dried, salted or in brine, smoked	Exports	Octopus	Dried	NA	Cephalopod	Cephalopod	2.82	544.26	0	0	0	0	0	0	0	0	0	0	0	0	0	0	0	0	0	0	0	0	0	0	0	0	0	0	0	0	0	0	0	0	0	0	0	0	0	0	0	0
Algeria	Octopus, frozen	Exports	Octopus	Frozen	NA	Cephalopod	Cephalopod	1	1298.48	0	0	0	0	0	0	0	0	0	0	0	0	0	0	0	0	0	0	0	0	0	0	0	0	0	0	0	0	0	0	0	0	0	0	0	0	0	0	0	0
Algeria	Octopus, live, fresh or chilled	Exports	Octopus	Live, fresh or chilled	NA	Cephalopod	Cephalopod	1	876.54	0	0	0	0	0	0	0	0	0	0	0	0	0	0	0	0	20	17	33	106	59	68	10	11	19	20	29	9	20	5	8	10	38	19	79	123	50	50	59	9
Algeria	Octopus, other than live, fresh or chilled	Exports	Octopus	Live, fresh or chilled	NA	Cephalopod	Cephalopod	1	12512.8	0	0	0	0	0	0	0	0	0	0	0	0	0	0	0	0	43	74	51	120	45	57	47	138	240	312	445	493	429	674	641	825	1096	544	507	622	775	733	1093	1172
Algeria	Octopus, other than live, fresh or chilled	Imports	Octopus	Live, fresh or chilled	NA	Cephalopod	Cephalopod	1	185	0	0	0	0	0	0	0	0	0	0	0	0	0	0	0	0	0	0	0	0	1	6	12	19	9	9	1	20	0	29	2	23	0	0	0	0	7	13	2	6
Algeria	Squids (Ommastrephes sagittatus, Loligo spp.), frozen	Imports	Squid	Frozen	NA	Cephalopod	Cephalopod	1	421.6	0	0	0	0	0	0	0	0	0	0	0	0	0	0	0	0	0	0	0	0	0	0	0	0	0	0	0	0	0	0	0	0	0	0	0	0	0	0	0	0
Algeria	Gadiformes fillets, frozen, nei	Imports	Cod and hake and haddock	Frozen	Fillets	Cod and hake and haddock	Fish	1.25	4307.5	0	0	0	0	0	0	0	0	0	0	0	0	0	0	0	0	0	0	0	0	0	0	0	0	0	0	0	0	0	0	0	0	0	0	0	0	571.25	1777.5	535	685
Algeria	Gadiformes nei, frozen	Imports	Cod and hake and haddock	Frozen	NA	Cod and hake and haddock	Fish	1	1531.67	0	0	0	0	0	0	0	0	0	0	0	0	0	0	0	0	0	0	0	0	0	0	0	0	0	0	0	0	0	0	0	0	0	0	0	0	678	184	118	231
Algeria	Gadiformes, fresh or chilled, nei	Imports	Cod and hake and haddock	Live, fresh or chilled	NA	Cod and hake and haddock	Fish	1	119.41	0	0	0	0	0	0	0	0	0	0	0	0	0	0	0	0	0	0	0	0	0	0	0	0	0	0	0	0	0	0	0	0	0	0	0	0	0	0	1	0
Algeria	Common sole (Solea Solea), frozen	Imports	Common sole (Solea Solea)	Frozen	NA	Common sole	Fish	1	2181	0	0	0	0	0	0	0	0	0	0	0	0	0	0	0	0	0	0	0	50	11	16	75	173	210	98	85	115	687	67	32	16	18	47	32	56	31	84	53	106
Algeria	Crab meat nei, prepared or preserved	Imports	Crab	Prepared or preserved	Meat	Crustacean	Crustacean	5.9701	1701.48	0	0	0	0	0	0	0	0	0	0	0	0	0	0	0	0	0	0	0	0	0	0	0	0	0	0	0	0	0	5.9701	0	0	5.9701	5.9701	5.9701	0	453.728	11.9402	119.402	17.9103
Algeria	Crabs nei, frozen	Imports	Crab	Frozen	NA	Crustacean	Crustacean	1	2632.12	0	0	0	0	0	0	0	0	0	0	0	0	0	0	0	0	0	0	0	0	0	0	4	2	2	0	2	0	24	7	8	16	0	22	75	225	342	159	298	280
Algeria	Crabs, not frozen	Imports	Crab	NA	NA	Crustacean	Crustacean	1	155	0	0	0	0	0	0	0	0	0	0	0	0	0	0	0	0	0	0	0	0	0	0	0	0	0	0	0	0	0	0	0	1	0	0	0	1	0	93	0	20
Algeria	Crustaceans nei, even smoked, frozen	Exports	Crustaceans	Smoked	NA	Crustacean	Crustacean	2	380	0	0	0	0	80	62	22	2	0	0	0	0	0	6	34	66	26	28	16	8	4	0	0	0	0	0	10	0	0	6	6	0	0	2	0	0	0	0	2	0
Algeria	Crustaceans nei, even smoked, frozen	Imports	Crustaceans	Smoked	NA	Crustacean	Crustacean	2	1126	0	0	0	0	0	0	0	0	0	0	0	0	0	0	0	0	0	0	0	0	4	0	0	0	0	0	0	12	6	0	6	2	0	0	146	184	122	46	40	74
Algeria	Miscellaneous crustaceans, not frozen, nei	Imports	Crustaceans	NA	NA	Crustacean	Crustacean	1	170	0	0	0	0	0	0	0	0	0	0	0	0	0	0	0	0	0	0	0	0	0	0	0	6	1	0	0	0	4	0	0	0	0	0	0	3	0	0	131	25
Algeria	Rock lobster and other sea crawfish (Palinurus, Panulirus, Jasus), even smoked, frozen, nei	Exports	Lobster	Smoked	NA	Crustacean	Crustacean	2	1116.72	0	0	14	0	0	0	0	0	0	0	0	0	0	0	0	6	12	38	54	112	20	46	14	110	108	56	90	78	2	30	16	24	62	70	44	94	2	0	0	4
Algeria	Rock lobster and other sea crawfish, not frozen	Exports	Lobster	NA	NA	Crustacean	Crustacean	1	165	0	0	0	0	0	0	0	0	0	0	0	0	0	0	0	0	5	4	2	7	6	5	4	4	10	17	14	10	3	8	12	15	14	3	2	1	1	0	2	6
Algeria	Shrimps and prawns, frozen, nei	Exports	Shrimps and prawns	Frozen	NA	Crustacean	Crustacean	1	10125	17	0	2	0	0	0	0	0	0	0	0	0	2	13	11	43	143	152	297	480	200	264	146	462	668	665	719	725	759	1024	875	677	595	485	339	362	0	0	0	0
Algeria	Shrimps and prawns, frozen, nei	Imports	Shrimps and prawns	Frozen	NA	Crustacean	Crustacean	1	5340	0	0	0	0	0	0	0	0	0	0	0	0	0	0	0	0	0	0	0	2	9	7	14	3	17	20	119	170	381	439	292	590	590	891	854	942	0	0	0	0
Algeria	Shrimps and prawns, not frozen, nei	Exports	Shrimps and prawns	NA	NA	Crustacean	Crustacean	1	1407	0	0	0	0	0	0	0	0	0	0	0	0	0	0	0	0	55	8	3	4	2	3	3	11	120	108	119	85	97	5	20	2	1	0	0	1	188	178	158	148
Algeria	Shrimps and prawns, not frozen, nei	Imports	Shrimps and prawns	NA	NA	Crustacean	Crustacean	1	518	0	0	0	0	0	0	0	0	0	0	0	0	0	0	0	0	0	0	0	0	0	0	0	2	0	0	1	0	0	0	0	0	1	26	2	1	70	131	108	101
Algeria	Shrimps and prawns, other than coldwater, even smoked, frozen	Exports	Shrimps and prawns	Smoked	NA	Crustacean	Crustacean	2	1173.38	0	0	0	0	0	0	0	0	0	0	0	0	0	0	0	0	0	0	0	0	0	0	0	0	0	0	0	0	0	0	0	0	0	0	0	0	186	72	110	94
Algeria	Shrimps and prawns, other than coldwater, even smoked, frozen	Imports	Shrimps and prawns	Smoked	NA	Crustacean	Crustacean	2	15708.4	0	0	0	0	0	0	0	0	0	0	0	0	0	0	0	0	0	0	0	0	0	0	0	0	0	0	0	0	0	0	0	0	0	0	0	0	1846	2252	2418	1752
Algeria	Shrimps and prawns, peeled, frozen	Imports	Shrimps and prawns	Frozen	Peeled	Crustacean	Crustacean	1.21	198.44	0	0	0	0	0	0	0	0	0	0	0	0	0	0	0	0	0	0	0	0	0	0	0	0	0	0	0	0	0	0	0	0	0	0	0	0	0	0	0	0
Algeria	Shrimps and prawns, prep. or pres., in airtight containers	Imports	Shrimps and prawns	Prepared or preserved	NA	Crustacean	Crustacean	2.27	276.94	0	0	0	0	0	0	0	0	0	0	0	0	0	0	0	0	0	0	0	0	0	0	0	0	0	0	0	0	0	0	0	0	0	0	0	0	6.81	270.13	0	0
Algeria	Cold-water shrimps and prawns (Pandalus spp., Crangon crangon), frozen, even smoked, whether in shell or not	Imports	Shrimps and prawns (Pandalus spp.)	Smoked	In shell or not	Crustacean	Crustacean	2.42	2954.82	0	0	0	0	0	0	0	0	0	0	0	0	0	0	0	0	0	0	0	0	0	0	0	0	0	0	0	0	0	0	0	0	0	0	0	0	304.92	416.24	343.64	416.24
Algeria	Dogfish and other sharks nei (excl. Squalus acanthias, Scyliorhinus spp., Lamna nasus, Prionace glauca), frozen	Imports	Dogfish and other sharks	Frozen	NA	Dogfish and other sharks	Fish	1	3748	0	0	0	0	0	0	0	0	0	0	0	0	0	0	0	0	0	0	0	0	13	72	248	328	171	143	150	66	314	430	235	122	149	246	136	103	96	72	151	220
Algeria	Dogfish, other sharks, rays and skates (Rajidae), fillets, frozen	Imports	Dogfish and other sharks	Frozen	Fillets	Dogfish and other sharks	Fish	1.25	381.25	0	0	0	0	0	0	0	0	0	0	0	0	0	0	0	0	0	0	0	0	0	0	0	0	0	0	0	0	0	0	0	0	0	0	0	0	0	0	0	0
Algeria	Eels and elvers live	Exports	Eels	Live, fresh or chilled	NA	Eels	Fish	1	321	0	0	0	0	0	0	0	0	0	0	0	0	0	0	0	0	4	0	22	26	36	20	29	13	0	34	33	16	27	7	6	20	14	14	0	0	0	0	0	0
Algeria	Eels, fresh or chilled	Exports	Eels	Live, fresh or chilled	NA	Eels	Fish	1	101.6	0	0	0	0	0	0	0	0	0	0	0	0	0	0	0	0	0	9	1	0	0	2	7	6	11	20	12	5	0	1	2	1	4	1	4	0	0	0	0	0
Algeria	European sardine, frozen	Imports	European sardine	Frozen	NA	European sardine	Fish	1	3573.38	0	0	0	0	0	0	0	0	0	0	0	0	0	0	0	0	0	0	0	0	0	0	0	0	0	0	0	0	0	0	0	0	0	0	0	0	0	0	0	0
Algeria	Fish dried, whether or not salted, nei	Exports	Fish	Dried	NA	Fish	Fish	2.82	12210.6	3874.68	5276.22	939.06	671.16	535.8	583.74	0	0	0	121.26	28.2	90.24	47.94	2.82	2.82	36.66	0	0	0	0	0	0	0	0	0	0	0	0	0	0	0	0	0	0	0	0	0	0	0	0
Algeria	Fish fillets, fresh or chilled, nei	Imports	Fish	Live, fresh or chilled	Fillets	Fish	Fish	1.25	1001.64	0	0	0	0	0	0	0	0	0	0	0	0	0	0	0	0	6.25	0	0	0	0	57.5	33.75	0	0	12.5	118.75	0	0	0	7.5	0	1.25	2.5	43.75	7.5	62.5	206.25	337.5	37.5
Algeria	Fish fillets, frozen, nei	Imports	Fish	Frozen	Fillets	Fish	Fish	1.25	87807.9	0	0	0	0	0	0	0	0	0	0	0	0	0	0	0	0	21.25	0	0	1313.75	151.25	611.25	987.5	647.5	350	492.5	553.75	885	1477.5	1717.5	3955	5358.75	5978.75	9273.75	8602.5	10298.8	220	403.75	7090	437.5
Algeria	Fish live, nei	Imports	Fish	Live, fresh or chilled	NA	Fish	Fish	1	119	0	0	0	0	0	0	0	0	0	0	0	0	0	0	0	0	0	0	0	0	0	0	0	0	0	0	0	0	0	0	0	0	0	0	0	1	1	0	0	0
Algeria	Fish meat, whether or not minced, frozen, nei	Imports	Fish	Frozen	Meat	Fish	Fish	1.25	14767.5	0	0	0	0	0	0	0	0	0	0	0	0	0	0	0	0	0	18.75	0	0	27.5	187.5	38.75	81.25	60	73.75	50	80	618.75	626.25	350	365	292.5	376.25	1877.5	1586.25	2881.25	1155	1260	983.75
Algeria	Fish minced nei, prepared or preserved	Imports	Fish	Prepared or preserved	Minced	Fish	Fish	2.66	8389.03	0	0	0	0	0	0	0	0	0	0	0	0	0	0	0	0	2.66	5.32	23.94	1295.42	13.3	45.22	106.4	1056.02	0	0	0	0	0	0	0	0	0	0	0	0	0	0	0	0
Algeria	Fish nei, prepared or preserved, not minced	Imports	Fish	Prepared or preserved	NA	Fish	Fish	2.66	1918.29	0	0	0	0	0	0	0	0	0	0	0	0	0	0	0	0	0	0	0	0	0	0	0	39.9	0	37.24	2.66	18.62	7.98	0	0	21.28	10.64	31.92	7.98	98.42	428.26	244.72	183.54	303.24
Algeria	Fish nei, salted or in brine	Imports	Fish	Salted	NA	Fish	Fish	2.82	1723.02	0	0	0	0	0	1624.32	2.82	0	0	0	0	0	0	0	0	0	0	0	2.82	0	0	0	0	0	0	0	5.64	0	0	2.82	0	0	2.82	0	47.94	28.2	2.82	0	0	2.82
Algeria	Fish, fresh or chilled, nei	Exports	Fish	Live, fresh or chilled	NA	Fish	Fish	1	3945.73	1	18	12	11	16	0	0	0	0	49	71	67	72	55	67	207	120	98	34	124	183	139	96	83	105	116	682	80	66	138	216	174	244	234	159	72	1	1	15	5
Algeria	Fish, fresh or chilled, nei	Imports	Fish	Live, fresh or chilled	NA	Fish	Fish	1	9034.1	0	0	0	0	0	600	2224	3087	0	10	0	0	0	0	0	0	0	0	0	0	0	0	0	18	28	13	10	1	1	5	3	2	10	69	17	78	159	682	326	369
Algeria	Fish, frozen, nei	Exports	Fish	Frozen	NA	Fish	Fish	1	451	0	0	0	0	0	10	5	60	78	0	0	0	0	0	41	48	1	10	14	18	2	9	1	12	21	18	4	2	0	10	7	29	30	6	5	3	1	1	0	2
Algeria	Fish, frozen, nei	Imports	Fish	Frozen	NA	Fish	Fish	1	71655	5	0	0	0	0	364	700	700	3468	7962	13333	3875	0	842	0	0	0	0	0	158	726	96	333	480	648	638	1567	4405	5065	2988	4347	2346	2317	3072	3198	4410	317	864	727	582
Algeria	Flatfish nei, fillets, fresh or chilled	Imports	Flatfish	Live, fresh or chilled	Fillets	Flatfish	Fish	1.25	195	0	0	0	0	0	0	0	0	0	0	0	0	0	0	0	0	0	0	0	0	0	0	0	0	0	0	0	0	0	0	0	0	0	0	0	0	0	0	6.25	188.75
Algeria	Flatfish nei, fillets, frozen	Imports	Flatfish	Frozen	Fillets	Flatfish	Fish	1.25	220	0	0	0	0	0	0	0	0	0	0	0	0	0	0	0	0	0	0	0	0	0	0	0	0	0	0	0	0	0	0	0	0	0	0	0	0	0	0	0	8.75
Algeria	Flatfish nei, frozen	Imports	Flatfish	Frozen	NA	Flatfish	Fish	1	1649	0	0	0	0	0	0	0	0	0	0	0	0	0	0	0	0	0	0	0	47	8	40	31	287	145	37	139	65	37	112	22	48	30	61	115	141	104	24	67	2
Algeria	Flatfish, fresh or chilled, nei	Exports	Flatfish	Live, fresh or chilled	NA	Flatfish	Fish	1	334	0	0	0	0	0	0	0	0	0	0	0	0	0	0	0	0	11	20	49	54	55	60	14	4	1	0	1	25	2	1	4	5	28	0	0	0	0	0	0	0
Algeria	Flatfish, fresh or chilled, nei	Imports	Flatfish	Live, fresh or chilled	NA	Flatfish	Fish	1	164	0	0	0	0	0	0	0	0	0	0	0	0	0	0	0	0	0	0	1	0	0	0	0	0	0	0	0	21	0	0	0	0	0	0	0	0	0	43	0	1
Algeria	Hake fillets in blocks, frozen	Imports	Hake	Frozen	Fillets	Hake	Fish	1.25	150.05	0	0	0	0	0	0	0	0	0	0	0	0	0	0	0	0	0	0	0	0	0	0	0	0	0	0	0	0	0	0	0	0	0	0	0	0	0	0	0	0
Algeria	Hake nei fillets, frozen	Imports	Hake	Frozen	Fillets	Hake	Fish	1.25	3632.3	0	0	0	0	0	0	0	0	0	0	0	0	0	0	0	0	0	0	0	0	0	0	0	0	0	0	0	0	0	0	0	0	0	0	0	0	65	170	2382.5	237.5
Algeria	Hake nei, fresh or chilled	Imports	Hake	Live, fresh or chilled	NA	Hake	Fish	1	8215.37	0	0	0	0	0	0	0	0	0	0	0	0	0	0	0	0	0	0	0	0	0	0	0	0	0	0	0	0	0	0	0	0	0	0	0	0	7	92	753	1325
Algeria	Hakes nei, frozen	Imports	Hake	Frozen	NA	Hake	Fish	1	45202.7	0	0	0	0	0	0	0	0	0	0	0	0	0	0	0	0	0	0	0	11	116	363	962	1347	1727	1371	2347	3955	4446	2514	1897	1623	1073	2233	1816	2158	1182	1634	4342	2076
Algeria	Jack and horse mackerels, fresh or chilled	Imports	Jack and horse mackerel	Live, fresh or chilled	NA	Jack and horse mackerel	Fish	1	2858.83	0	0	0	0	0	0	0	0	0	0	0	0	0	0	0	0	0	0	0	0	0	0	0	0	0	0	0	0	0	0	0	0	0	0	0	0	0	0	42	113
Algeria	Mackerel prepared or preserved, not minced, nei	Imports	Mackerel	Prepared or preserved	NA	Mackerel	Fish	2.66	2829.81	0	0	0	2.66	0	0	0	0	0	0	0	0	0	0	0	0	0	0	0	15.96	667.66	0	798	0	0	0	29.26	0	962.92	0	0	58.52	7.98	42.56	15.96	7.98	13.3	61.18	23.94	63.84
Algeria	Mackerels nei, frozen	Imports	Mackerel	Frozen	NA	Mackerel	Fish	1	879.12	0	0	0	0	0	0	0	0	0	0	0	0	0	0	0	0	0	0	0	0	0	0	175	434	248	0	0	0	0	0	0	1	0	0	1	0	0	11	0	1
Algeria	Mackerels, nei, fresh or chilled	Imports	Mackerel	Live, fresh or chilled	NA	Mackerel	Fish	1	1261.31	0	0	0	0	0	0	0	0	0	0	0	0	0	0	0	0	0	0	0	0	0	0	0	0	0	0	0	0	0	0	0	0	0	0	0	0	1	0	116	140
Algeria	Marine fish nei, minced, prepared or preserved	Imports	Marine fish	Prepared or preserved	Minced	Marine fish	Fish	2.66	24312.4	0	0	0	0	0	0	0	0	0	0	0	0	0	0	0	0	0	0	0	0	0	0	0	0	0	0	87.78	42.56	244.72	289.94	98.42	151.62	295.26	593.18	736.82	2721.18	2973.88	742.14	4237.38	9855.3
Algeria	Marine fish nei, prepared or preserved, not minced	Imports	Marine fish	Prepared or preserved	NA	Marine fish	Fish	2.66	4636.38	2.66	10.64	5.32	7.98	827.26	1127.84	13.3	2593.5	0	0	0	0	0	0	0	0	0	0	2.66	31.92	0	0	0	0	0	0	0	0	0	0	0	0	0	0	0	0	0	0	0	0
Algeria	Marine fish, fresh or chilled, nei	Exports	Marine fish	Live, fresh or chilled	NA	Marine fish	Fish	1	235.2	0	0	0	0	0	0	0	0	0	0	0	0	0	0	0	0	0	0	0	0	0	0	0	0	0	0	0	0	0	0	0	0	0	0	0	0	0	0	0	0
Algeria	Marine fish, fresh or chilled, nei	Imports	Marine fish	Live, fresh or chilled	NA	Marine fish	Fish	1	143.51	0	0	0	0	0	0	0	0	0	0	0	0	0	0	0	0	0	0	0	0	0	0	0	0	0	0	0	0	0	0	0	0	0	0	0	0	0	0	0	0
Algeria	Nile perch (Lates niloticus) and snakeheads (Channa spp.), frozen	Imports	Nile perch (Lates niloticus) and snakeheads (Channa spp.)	Frozen	NA	Nile perch and snakeheads (Channa spp.)	Fish	1	2600	0	0	0	0	0	0	0	0	0	0	0	0	0	0	0	0	0	0	0	0	0	0	0	0	0	0	0	0	0	0	0	0	0	0	0	0	99	7	147	1190
Algeria	Pacific salmons, frozen, nei	Imports	Pacific salmons	Frozen	NA	Pacific salmons	Fish	1	185	0	0	0	0	0	0	0	0	0	0	0	0	0	0	0	0	0	0	0	2	0	0	1	1	0	0	0	1	15	25	0	14	32	60	1	9	0	10	9	4
Algeria	Pilchards (Sardinops spp.), prep. or pres., not minced, nei	Imports	Pilchards (Sardinops spp.)	Prepared or preserved	NA	Pilchards (Sardinops spp.)	Fish	2.66	3186.68	516.04	5.32	0	1178.38	0	0	0	0	550.62	885.78	50.54	0	0	0	0	0	0	0	0	0	0	0	0	0	0	0	0	0	0	0	0	0	0	0	0	0	0	0	0	0
Algeria	Rays and skates (Rajidae), frozen	Imports	Rays and skates (Rajidae)	Frozen	NA	Rays and skates (Rajidae)	Fish	1	230.16	0	0	0	0	0	0	0	0	0	0	0	0	0	0	0	0	0	0	0	0	0	0	0	0	0	0	0	0	0	0	0	0	0	0	0	0	34	19	20	43
Algeria	Salmon fillets, fresh or chilled	Imports	Salmon	Live, fresh or chilled	Fillets	Salmon	Fish	1.25	177.5	0	0	0	0	0	0	0	0	0	0	0	0	0	0	0	0	0	0	0	0	0	0	0	0	0	0	0	0	0	0	0	0	0	0	0	0	2.5	26.25	31.25	38.75
Algeria	Salmon fillets, frozen	Imports	Salmon	Frozen	Fillets	Salmon	Fish	1.25	643	0	0	0	0	0	0	0	0	0	0	0	0	0	0	0	0	0	0	0	0	0	0	0	0	0	0	0	0	0	0	0	0	0	0	0	0	0	93.75	93.75	158.75
Algeria	Salmonoids, fresh or chilled, nei	Exports	Salmonids	Live, fresh or chilled	NA	Salmonids	Fish	1	1205	0	0	0	0	0	0	0	0	0	0	0	0	0	0	0	0	30	15	0	14	39	8	10	13	39	69	82	66	103	56	151	170	66	11	3	0	43	50	54	63
Algeria	Salmonoids, fresh or chilled, nei	Imports	Salmonids	Live, fresh or chilled	NA	Salmonids	Fish	1	288	0	0	0	0	0	0	0	0	0	0	0	0	0	0	0	0	0	0	1	0	0	0	0	0	0	1	2	2	0	0	0	2	14	11	13	19	29	35	55	36
Algeria	Salmonoids, frozen	Imports	Salmonids	Frozen	NA	Salmonids	Fish	1	7612	0	0	0	0	0	0	0	0	0	0	0	0	0	0	0	0	2	7	3	438	24	43	202	565	402	449	182	0	6	0	0	0	0	124	1	0	1720	1193	2048	20
Algeria	Sardines, sardinellas, brisling or sprats, fresh or chilled	Imports	Sardine, sardinella, sprat	Live, fresh or chilled	NA	Sardine and sardinella and sprat	Fish	1	852	0	0	0	0	0	0	0	0	0	0	0	0	0	0	0	0	0	0	0	0	206	494	25	0	0	0	0	0	0	0	0	36	3	21	67	0	0	0	0	0
Algeria	Sardines, sardinellas, brisling or sprats, frozen	Exports	Sardine, sardinella, sprat	Frozen	NA	Sardine and sardinella and sprat	Fish	1	124	0	0	0	0	0	0	0	0	0	0	0	0	0	0	0	0	0	1	0	0	0	0	0	0	0	0	0	0	0	0	0	123	0	0	0	0	0	0	0	0
Algeria	Sardines, sardinellas, brisling or sprats, frozen	Imports	Sardine, sardinella, sprat	Frozen	NA	Sardine and sardinella and sprat	Fish	1	36329.4	0	0	0	0	0	0	0	0	0	0	0	0	0	0	0	0	17	0	0	0	0	29	339	206	612	313	46	547	687	735	250	331	1256	3193	3052	2018	3282	2362	2057	3530
Algeria	Sardines, sardinellas, brisling or sprats, prep. or pres., not minced, nei	Imports	Sardine, sardinella, sprat	Prepared or preserved	NA	Sardine and sardinella and sprat	Fish	2.66	43413.9	0	0	0	0	0	0	0	0	0	0	0	0	0	0	0	0	0	0	77.14	728.84	1095.92	896.42	579.88	1782.2	335.16	1244.88	728.84	457.52	795.34	1191.68	3614.94	5700.38	3434.06	5455.66	1824.76	470.82	4718.84	1558.76	547.96	2816.94
Algeria	Seabass, fresh or chilled	Imports	Seabass	Live, fresh or chilled	NA	Seabass	Fish	1	512.16	0	0	0	0	0	0	0	0	0	0	0	0	0	0	0	0	0	0	0	0	0	0	0	0	0	0	0	0	0	0	0	0	0	0	0	0	0	5	39	92
Algeria	Seabass, frozen	Imports	Seabass	Frozen	NA	Seabass	Fish	1	289	0	0	0	0	0	0	0	0	0	0	0	0	0	0	0	0	0	0	0	0	0	10	0	0	0	0	0	0	52	97	52	27	26	6	15	0	3	1	0	0
Algeria	Seabreams nei, fresh or chilled	Imports	Seabreams	Live, fresh or chilled	NA	Seabream	Fish	1	1060.44	0	0	0	0	0	0	0	0	0	0	0	0	0	0	0	0	0	0	0	0	0	0	0	0	0	0	0	0	0	0	0	0	0	0	0	0	0	25	117	282
Algeria	Skipjack prepared or preserved, not minced, nei	Imports	Skipjack tuna	Prepared or preserved	NA	Skipjack tuna	Fish	2.66	18964.7	0	0	0	0	0	0	0	0	0	0	0	0	0	0	0	0	0	0	0	0	0	0	0	0	0	0	0	0	0	0	0	0	0	0	0	0	0	0	0	0
Algeria	Skipjack tuna, frozen	Imports	Skipjack tuna	Frozen	NA	Skipjack tuna	Fish	1	2984.55	0	0	0	0	0	0	0	0	0	0	0	0	0	0	0	0	0	0	0	0	4	0	0	208	155	150	46	150	142	176	127	36	0	75	0	0	0	15	0	0
Algeria	Southern bluefin tuna (Thunnus maccoyii), live	Exports	Southern bluefin tuna (Thunnus maccoyii)	Live, fresh or chilled	NA	Southern bluefin tuna	Fish	1	216.9	0	0	0	0	0	0	0	0	0	0	0	0	0	0	0	0	0	0	0	0	0	0	0	0	0	0	0	0	0	0	0	0	0	0	0	0	0	0	0	30
Algeria	Southern bluefin tuna (Thunnus maccoyii), live	Imports	Southern bluefin tuna (Thunnus maccoyii)	Live, fresh or chilled	NA	Southern bluefin tuna	Fish	1	726	0	0	0	0	0	0	0	0	0	0	0	0	0	0	0	0	0	0	0	0	0	0	0	0	0	0	0	0	0	0	0	0	0	0	0	0	0	0	0	0
Algeria	Southern bluefin tuna(Thunnus maccoyii), fresh or chilled	Exports	Southern bluefin tuna (Thunnus maccoyii)	Live, fresh or chilled	NA	Southern bluefin tuna	Fish	1	664	0	0	0	0	0	0	0	0	0	0	0	0	0	0	0	0	0	0	0	0	0	0	0	0	0	0	0	0	0	0	0	0	0	0	0	0	0	0	0	45
Algeria	Swordfish fillets, frozen	Imports	Swordfish	Frozen	Fillets	Swordfish	Fish	1.25	143.75	0	0	0	0	0	0	0	0	0	0	0	0	0	0	0	0	0	0	0	0	0	0	0	0	0	0	0	0	0	0	0	123.75	0	18.75	0	0	0	0	1.25	0
Algeria	Swordfish meat, frozen	Imports	Swordfish	Frozen	Meat	Swordfish	Fish	1.25	173.75	0	0	0	0	0	0	0	0	0	0	0	0	0	0	0	0	0	0	0	0	0	0	0	0	0	0	0	0	0	0	0	62.5	0	0	0	0	3.75	0	12.5	0
Algeria	Swordfish, frozen	Imports	Swordfish	Frozen	NA	Swordfish	Fish	1	154	0	0	0	0	0	0	0	0	0	0	0	0	0	0	0	0	0	0	0	0	0	0	0	0	0	0	0	0	0	0	0	0	28	13	0	0	8	16	75	6
Algeria	Tilapia fillets, frozen	Imports	Tilapia	Frozen	Fillets	Tilapia	Fish	1.25	195	0	0	0	0	0	0	0	0	0	0	0	0	0	0	0	0	0	0	0	0	0	0	0	0	0	0	0	0	0	0	0	0	0	0	0	0	195	0	0	0
Algeria	Tilapias, catfish, carp, eels, Nile perch and snakeheads meat, frozen	Imports	Tilapias, catfish, carp, eels, Nile perch and snakeheads	Frozen	Meat	Tilapia and catfish and carp	Fish	1.25	185	0	0	0	0	0	0	0	0	0	0	0	0	0	0	0	0	0	0	0	0	0	0	0	0	0	0	0	0	0	0	0	0	0	0	0	0	61.25	123.75	0	0
Algeria	Trouts and chars, frozen	Imports	Trouts and chars	Frozen	NA	Trout and char	Fish	1	177	0	0	0	0	0	0	0	0	0	0	0	0	0	0	0	0	0	0	0	3	1	0	0	0	8	12	150	1	0	0	0	0	0	0	0	0	2	0	0	0
Algeria	Tuna loins and fillets, fresh or chilled	Imports	Tuna	Live, fresh or chilled	Loins	Tuna	Fish	1.25	485.625	0	0	0	0	0	0	0	0	0	0	0	0	0	0	0	0	0	0	0	0	0	0	0	0	0	0	0	0	0	0	0	0	0	0	0	0	0	0	0	0
Algeria	Tuna loins and fillets, frozen	Exports	Tuna	Frozen	Loins	Tuna	Fish	1.25	458.6	0	0	0	0	0	0	0	0	0	0	0	0	0	0	0	0	0	0	0	0	0	0	0	0	0	0	0	0	0	0	0	0	0	0	0	0	0	0	0	0
Algeria	Tuna loins and fillets, frozen	Imports	Tuna	Frozen	Loins	Tuna	Fish	1.25	18451.3	0	0	0	0	0	0	0	0	0	0	0	0	0	0	0	0	0	0	0	0	0	0	0	0	0	0	0	0	0	0	0	0	0	0	0	0	342.5	0	2498.75	7786.25
Algeria	Tuna loins, prepared or preserved	Imports	Tuna	Prepared or preserved	Loins	Tuna	Fish	2.66	1521.84	0	0	0	0	0	0	0	0	0	0	0	0	0	0	0	0	0	0	0	0	0	0	0	0	0	0	0	0	0	0	0	0	0	0	0	0	0	0	0	0
Algeria	Tunas nei, frozen	Imports	Tuna	Frozen	NA	Tuna	Fish	1	24878	0	151	0	0	0	0	0	0	742	1680	3300	4240	2798	2890	1952	0	0	0	230	105	99	104	193	892	1593	990	1007	804	557	300	0	0	0	8	0	125	2	0	69	2
Algeria	Tunas prepared or preserved, not minced, in oil	Exports	Tuna	Prepared or preserved	NA	Tuna	Fish	2.66	449.54	0	0	0	0	0	0	0	0	0	0	0	0	0	0	0	0	0	0	0	0	0	0	0	0	0	0	0	0	0	0	0	0	0	0	0	0	0	0	0	0
Algeria	Tunas prepared or preserved, not minced, in oil	Imports	Tuna	Prepared or preserved	NA	Tuna	Fish	2.66	11289.4	0	0	0	0	0	0	0	0	0	0	0	0	0	0	0	0	0	0	0	0	0	0	0	0	0	0	0	0	0	0	0	0	0	0	0	0	0	0	0	0
Algeria	Tunas prepared or preserved, not minced, nei	Exports	Tuna	Prepared or preserved	NA	Tuna	Fish	2.66	2880.78	0	0	0	0	0	0	0	0	0	0	0	0	0	0	0	0	0	0	0	0	0	0	0	0	2.66	2.66	367.08	250.04	42.56	0	2.66	2.66	15.96	287.28	755.44	90.44	438.9	146.3	186.2	180.88
Algeria	Tunas prepared or preserved, not minced, nei	Imports	Tuna	Prepared or preserved	NA	Tuna	Fish	2.66	277246	904.4	782.04	904.4	1133.16	0	0	0	0	127.68	1686.44	2.66	0	0	0	0	0	58.52	231.42	1061.34	6743.1	2753.1	2287.6	3851.68	1332.66	2237.06	4099.06	4027.24	4471.46	4468.8	6304.2	9788.8	15954.7	10616.1	14340.1	20756	16904.3	15146	21500.8	17931.1	19431.3
Algeria	Tunas, fresh or chilled, nei	Imports	Tuna	Live, fresh or chilled	NA	Tuna	Fish	1	732	0	0	0	0	0	0	0	0	0	0	0	0	0	565	0	0	0	0	5	48	24	17	0	18	0	0	48	3	0	0	0	0	0	0	0	0	2	2	0	0
Algeria	Tunas, bonitos, billfishes etc., prepared or preserved, not minced, nei	Imports	Tunas, bonitos, billfishes	Prepared or preserved	NA	Tuna and bonito and billfish	Fish	2.66	1327.34	0	0	0	0	0	0	0	0	0	0	0	0	0	0	0	0	0	0	0	0	0	0	0	0	0	0	0	0	0	0	0	0	0	0	0	0	0	0	0	0
Algeria	Yellowfin tuna, frozen, nei	Imports	Yellowfin tuna	Frozen	NA	Yellowfin tuna	Fish	1	4361.44	0	0	0	0	0	0	0	0	0	0	0	0	0	0	0	0	0	0	0	0	0	0	0	0	0	90	263	30	0	113	419	20	0	86	0	0	0	0	0	2
Angola	Alaska pollock fillets, frozen	Imports	Alaska pollock	Frozen	Fillets	Alaska pollock	Fish	1.25	295.4	0	0	0	0	0	0	0	0	0	0	0	0	0	0	0	0	0	0	0	0	0	17.5	0	0	0	0	0	0	0	0	0	17.5	16.25	0	0	0	0	0	33.75	10
Angola	Alaska pollock, frozen	Imports	Alaska pollock	Frozen	NA	Alaska pollock	Fish	1	356.38	0	0	0	0	0	0	0	0	0	0	0	0	0	0	0	0	0	0	0	0	0	0	0	0	0	0	0	0	0	0	0	0	0	0	0	0	0	0	2	5
Angola	Anchovies, prepared or preserved, not minced	Imports	Anchovy	Prepared or preserved	NA	Anchovy	Fish	2.66	516.04	0	0	0	0	0	0	0	0	0	0	0	0	0	0	0	0	0	0	0	0	0	0	0	0	0	0	5.32	10.64	0	111.72	26.6	10.64	164.92	29.26	42.56	23.94	39.9	21.28	21.28	2.66
Angola	Argentinian hake, frozen	Imports	Argentine hake	Frozen	NA	Argentine hake	Fish	1	111.91	0	0	0	0	0	0	0	0	0	0	0	0	0	0	0	0	0	0	0	0	0	0	0	0	0	0	0	0	0	0	6	4	15	0	0	0	0	0	0	0
Angola	Atlantic(Thunnus thynnus), Pacific(T.orientalis) bluefin tuna, live	Exports	Atlantic (Thunnus thynnus)and Pacific (Thunnus orientalis) bluefin tuna	Live, fresh or chilled	NA	Atlantic and Pacific bluefin tuna	Fish	1	853	0	0	0	0	0	0	0	0	0	0	0	0	0	0	0	0	0	0	0	0	0	0	0	0	0	0	0	0	0	0	0	0	0	0	0	0	0	0	0	0
Angola	Atlantic cod, frozen	Imports	Atlantic cod	Frozen	NA	Atlantic cod	Fish	1	605.49	0	0	0	0	0	0	0	0	0	0	0	0	0	0	0	0	0	0	0	11	0	2	1	0	14	1	1	5	20	30	91	97	202	0	0	0	0	0	0	0
Angola	Atlantic mackerel prepared or preserved, not minced	Imports	Atlantic mackerel	Prepared or preserved	NA	Atlantic mackerel	Fish	2.66	1590.68	0	0	0	0	0	0	0	0	0	0	0	0	0	0	0	0	0	0	0	0	0	675.64	0	0	0	0	0	0	0	0	0	0	915.04	0	0	0	0	0	0	0
Angola	Atlantic mackerel, frozen	Exports	Atlantic mackerel	Frozen	NA	Atlantic mackerel	Fish	1	2758.5	0	0	0	0	0	0	0	0	0	0	0	0	0	0	0	0	0	0	0	0	0	0	0	0	0	0	0	0	0	0	0	0	0	0	0	0	0	0	0	0
Angola	Atlantic and Danube salmons, fresh or chilled	Imports	Atlantic salmon and Danube salmon	Live, fresh or chilled	NA	Atlantic salmon and Danube salmon	Fish	1	461.36	0	0	0	0	0	0	0	0	0	0	0	0	0	0	0	0	0	0	0	0	0	1	0	0	0	0	0	2	0	0	0	3	0	0	0	0	0	0	21	20
Angola	Atlantic salmon and Danube salmon, frozen	Imports	Atlantic salmon and Danube salmon	Frozen	NA	Atlantic salmon and Danube salmon	Fish	1	195.33	0	0	0	0	0	0	0	0	0	0	0	0	0	0	0	0	0	0	0	0	0	0	0	0	0	0	0	0	0	0	0	0	0	3	9	7	15	31	32	46
Angola	Cape hake, frozen	Imports	Cape hake	Frozen	NA	Cape hake	Fish	1	446.84	0	0	0	0	0	0	0	0	0	0	0	0	0	0	0	0	0	0	0	0	0	0	22	0	16	121	2	71	0	3	23	36	139	0	0	0	0	0	0	0
Angola	Carps, frozen	Imports	Carps	Frozen	NA	Carps	Fish	1	137	0	0	0	0	0	0	0	0	0	0	0	0	0	0	0	0	0	0	0	0	0	0	0	0	0	0	0	0	0	0	0	0	0	0	0	0	0	0	135	2
Angola	Carps, eels and snakeheads, fillets, fresh or chilled	Imports	Carps, eels and snakeheads	Live, fresh or chilled	Fillets	Carps and eels and snakeheads	Fish	1.25	498.275	0	0	0	0	0	0	0	0	0	0	0	0	0	0	0	0	0	0	0	0	0	0	0	0	0	0	0	0	0	0	0	0	0	0	0	0	0	0	315	55
Angola	Catfish fillets, fresh or chilled	Imports	Catfish	Live, fresh or chilled	Fillets	Catfish	Fish	1.25	747.3	0	0	0	0	0	0	0	0	0	0	0	0	0	0	0	0	0	0	0	0	0	0	0	0	0	0	0	0	0	0	0	0	0	0	0	0	0	0	181.25	107.5
Angola	Catfish fillets, frozen	Imports	Catfish	Frozen	Fillets	Catfish	Fish	1.25	1373.19	0	0	0	0	0	0	0	0	0	0	0	0	0	0	0	0	0	0	0	0	0	0	0	0	0	0	0	0	0	0	0	0	0	0	0	0	0	0	445	412.5
Angola	Catfish, fresh or chilled	Imports	Catfish	Live, fresh or chilled	NA	Catfish	Fish	1	123	0	0	0	0	0	0	0	0	0	0	0	0	0	0	0	0	0	0	0	0	0	0	0	0	0	0	0	0	0	0	0	0	0	0	0	0	0	0	26	96
Angola	Catfish, frozen	Imports	Catfish	Frozen	NA	Catfish	Fish	1	2497.53	0	0	0	0	0	0	0	0	0	0	0	0	0	0	0	0	0	0	0	0	0	0	0	0	0	0	0	0	0	0	0	0	0	0	0	0	0	0	541	1041
Angola	Cephalopods nei, frozen	Exports	Cephalopod	Frozen	NA	Cephalopod	Cephalopod	1	2255	0	0	0	0	0	0	0	0	0	0	0	0	0	169	94	401	252	216	1123	0	0	0	0	0	0	0	0	0	0	0	0	0	0	0	0	0	0	0	0	0
Angola	Cuttlefishes (Sepia off., Rossia macrosoma, Sepiola rondeleti), frozen	Exports	Cuttlefish	Frozen	NA	Cephalopod	Cephalopod	1	6970	0	0	0	0	0	0	0	0	0	0	0	0	0	0	0	0	0	0	0	240	93	21	388	509	956	1371	1841	447	485	308	52	259	0	0	0	0	0	0	0	0
Angola	Cuttlefishes, frozen	Exports	Cuttlefish	Frozen	NA	Cephalopod	Cephalopod	1	5658.96	0	0	0	0	0	0	0	0	0	0	0	0	0	0	0	0	0	0	0	0	5	0	0	71	435	951	1663	548	941	443	97	504	0	0	0	0	0	0	0	0
Angola	Cuttlefish and squid, other than live, fresh or chilled	Exports	Cuttlefish and squid	Live, fresh or chilled	NA	Cephalopod	Cephalopod	1	289	0	0	0	0	0	0	0	0	0	0	0	0	0	0	0	0	0	0	0	0	0	0	289	0	0	0	0	0	0	0	0	0	0	0	0	0	0	0	0	0
Angola	Cuttlefish and squid, other than live, fresh or chilled	Imports	Cuttlefish and squid	Live, fresh or chilled	NA	Cephalopod	Cephalopod	1	2436.65	0	0	0	0	0	0	0	0	0	0	0	0	0	0	0	0	0	0	0	0	0	1	1	0	2	0	0	2	4	11	43	32	56	250	271	329	208	227	468	189
Angola	Cuttlefishes and squids, live, fresh or chilled, nei	Exports	Cuttlefish and squid	Live, fresh or chilled	NA	Cephalopod	Cephalopod	1	100	0	0	0	0	0	0	0	0	0	0	0	0	0	0	0	0	0	0	0	0	0	0	0	0	0	0	0	0	0	0	0	0	0	0	0	0	0	0	0	0
Angola	Octopus, frozen	Exports	Octopus	Frozen	NA	Cephalopod	Cephalopod	1	1011.69	0	0	0	0	0	0	0	0	0	0	0	0	0	0	0	0	0	0	0	0	0	0	61	176	59	75	331	35	239	0	0	0	0	0	0	0	0	0	0	0
Angola	Octopus, other than live, fresh or chilled	Imports	Octopus	Live, fresh or chilled	NA	Cephalopod	Cephalopod	1	979	0	0	0	0	0	0	0	0	0	0	0	0	0	0	0	0	0	0	0	0	0	4	0	1	2	2	1	6	9	7	7	9	17	47	78	170	101	60	167	72
Angola	Squids (Ommastrephes sagittatus, Loligo spp.), frozen	Exports	Squid	Frozen	NA	Cephalopod	Cephalopod	1	787	0	0	0	0	0	0	0	0	0	0	0	0	0	0	0	0	0	0	0	1	4	6	36	34	51	515	135	5	0	0	0	0	0	0	0	0	0	0	0	0
Angola	Squids nei, frozen	Exports	Squid	Frozen	NA	Cephalopod	Cephalopod	1	1083	0	0	0	0	0	0	0	0	0	0	0	0	0	0	0	0	0	0	0	0	0	0	45	66	0	758	148	66	0	0	0	0	0	0	0	0	0	0	0	0
Angola	Squids nei, frozen	Imports	Squid	Frozen	NA	Cephalopod	Cephalopod	1	113	0	0	0	0	0	0	0	0	0	0	0	0	0	0	0	0	0	0	0	0	0	1	0	0	1	0	1	0	4	8	9	38	51	0	0	0	0	0	0	0
Angola	Clupeoids nei, frozen	Exports	Clupeoids	Frozen	NA	Clupeoids	Fish	1	415	0	0	0	0	0	0	0	0	0	0	0	0	0	0	0	0	0	0	0	0	0	0	0	0	0	347	0	68	0	0	0	0	0	0	0	0	0	0	0	0
Angola	Cod nei, fillets, frozen	Imports	Cod	Frozen	Fillets	Cod	Fish	1.25	736.725	0	0	0	0	0	0	0	0	0	0	0	0	0	0	0	0	0	0	0	0	0	12.5	0	3.75	0	0	0	11.25	10	2.5	28.75	0	0	0	0	0	0	0	425	38.75
Angola	Cod, salted and dried (klipfish)	Imports	Cod	Dried	NA	Cod	Fish	2.82	34577.1	0	0	0	0	0	0	0	0	0	152.28	298.92	772.68	846	1322.58	1192.86	1308.48	1009.56	736.02	0	1119.54	1635.6	2061.42	1347.96	896.76	1297.2	1096.98	1252.08	1652.52	2301.12	1906.32	2391.36	3352.98	3603.96	0	0	0	0	0	0	0
Angola	Cods nei, dried, whether or not salted	Imports	Cod	Dried	NA	Cod	Fish	2.82	178385	0	0	0	0	0	0	0	0	0	0	0	0	0	0	0	0	0	0	0	2.82	152.28	42.3	28.2	0	64.86	31.02	50.76	5.64	8.46	2.82	0	42.3	67.68	3998.76	8321.82	28764	47319.6	19740	28095.7	21245.9
Angola	Cods nei, frozen	Imports	Cod	Frozen	NA	Cod	Fish	1	2401	0	0	0	0	0	0	0	0	0	0	0	0	0	0	0	0	0	0	0	0	0	0	2	5	2	0	2	0	1	14	38	30	51	35	33	50	122	482	356	205
Angola	Cods nei, salted or in brine	Imports	Cod	Salted	NA	Cod	Fish	2.82	4450.27	0	0	0	0	0	0	0	0	0	0	0	0	0	0	0	0	0	0	0	14.1	135.36	28.2	2.82	33.84	19.74	70.5	31.02	5.64	5.64	5.64	14.1	8.46	8.46	155.1	70.5	56.4	59.22	493.5	547.08	1153.38
Angola	Cods, fresh or chilled, nei	Imports	Cod	Live, fresh or chilled	NA	Cod	Fish	1	510.96	0	0	0	0	0	0	0	0	0	0	0	0	0	0	0	0	0	0	0	0	0	0	8	9	26	40	24	26	5	3	3	3	13	37	19	25	3	10	102	98
Angola	Gadiformes fillets, frozen, nei	Imports	Cod and hake and haddock	Frozen	Fillets	Cod and hake and haddock	Fish	1.25	136.05	0	0	0	0	0	0	0	0	0	0	0	0	0	0	0	0	0	0	0	0	0	0	0	0	0	0	0	0	0	0	0	0	0	0	0	0	0	0	62.5	37.5
Angola	Gadiformes nei, dried and salted	Imports	Cod and hake and haddock	Dried	NA	Cod and hake and haddock	Fish	2.82	14666.8	0	0	0	0	0	0	0	0	0	583.74	1221.06	1714.56	1001.1	2695.92	2047.32	3336.06	518.88	1232.34	174.84	0	11.28	0	0	0	0	0	0	0	0	0	0	0	129.72	0	0	0	0	0	0	0
Angola	Gadiformes nei, frozen	Imports	Cod and hake and haddock	Frozen	NA	Cod and hake and haddock	Fish	1	1278.64	0	0	0	0	0	0	0	0	0	0	0	0	0	0	0	0	0	0	0	0	0	0	0	0	0	0	0	0	0	0	0	0	0	0	0	0	0	0	671	100
Angola	Gadiformes, dried, whether or not salted, but not smoked	Imports	Cod and hake and haddock	Dried	NA	Cod and hake and haddock	Fish	2.82	532.98	0	0	0	0	0	0	0	0	0	0	0	0	0	0	0	0	0	0	0	0	0	0	0	0	0	0	0	0	0	0	0	0	0	0	0	0	0	0	0	0
Angola	Common sole (Solea Solea), frozen	Exports	Common sole (Solea Solea)	Frozen	NA	Common sole	Fish	1	221.7	0	0	0	0	0	0	0	0	0	0	0	0	0	0	0	0	0	0	0	11	0	61	21	9	5	27	32	14	1	0	0	0	0	0	0	0	0	0	0	0
Angola	Croakers, frozen	Exports	Croaker	Frozen	NA	Croaker	Fish	1	121.2	0	0	0	0	0	0	0	0	0	0	0	0	0	0	0	0	0	0	0	0	0	0	0	0	0	0	0	0	0	0	0	0	0	0	0	0	0	0	0	0
Angola	Croakers, frozen	Imports	Croaker	Frozen	NA	Croaker	Fish	1	4150.04	0	0	0	0	0	0	0	0	0	0	0	0	0	0	0	0	0	0	0	0	0	0	0	0	331	203	416	267	331	109	148	56	834	0	0	0	0	0	0	0
Angola	Crab meat nei, prepared or preserved	Exports	Crab	Prepared or preserved	Meat	Crustacean	Crustacean	5.9701	35880.3	0	0	0	0	0	0	0	0	0	0	0	0	0	0	0	0	0	0	0	0	985.066	2507.44	2620.87	2071.62	2334.31	2573.11	2179.09	1683.57	1713.42	1008.95	704.472	0	0	0	0	0	0	0	0	0
Angola	Crabs nei, frozen	Exports	Crab	Frozen	NA	Crustacean	Crustacean	1	5559.43	0	0	0	0	0	0	0	0	0	0	0	0	15	0	0	24	37	0	0	241	66	196	211	227	173	200	184	2	9	172	247	125	86	79	13	10	70	102	81	91
Angola	Crabs nei, frozen	Imports	Crab	Frozen	NA	Crustacean	Crustacean	1	228.21	0	0	0	0	0	0	0	0	0	0	0	0	0	0	0	0	0	0	0	0	0	0	0	0	0	0	0	0	0	3	2	1	1	15	24	10	20	19	45	15
Angola	Crustaceans nei, even smoked, frozen	Imports	Crustaceans	Smoked	NA	Crustacean	Crustacean	2	719.76	0	0	0	0	0	0	0	0	0	0	0	0	0	0	0	0	0	0	0	0	0	2	0	0	0	2	0	2	0	4	0	2	12	40	64	160	86	132	80	80
Angola	Deepwater rose shrimps (Parapenaeus longirostris), frozen	Exports	Deepwater rose shrimps (Parapenaeus longirostris)	Frozen	NA	Crustacean	Crustacean	1	347.27	0	0	0	0	0	0	0	0	0	0	0	0	0	0	0	0	0	0	0	0	0	0	0	0	0	0	0	0	0	0	0	0	0	0	0	0	0	0	0	0
Angola	Rock lobster and other sea crawfish (Palinurus, Panulirus, Jasus), even smoked, frozen, nei	Imports	Lobster	Smoked	NA	Crustacean	Crustacean	2	224.36	0	0	0	0	0	0	0	0	0	0	0	0	0	0	0	0	0	0	0	0	0	0	0	0	0	0	0	0	0	0	0	0	0	50	24	10	22	26	34	12
Angola	Shrimps and prawns, frozen, nei	Exports	Shrimps and prawns	Frozen	NA	Crustacean	Crustacean	1	16032	0	0	0	0	0	0	0	0	0	0	0	0	305	67	277	333	780	0	0	0	0	16	84	105	49	185	1385	59	60	845	1196	1280	813	837	1046	609	1318	1507	1284	1592
Angola	Shrimps and prawns, frozen, nei	Imports	Shrimps and prawns	Frozen	NA	Crustacean	Crustacean	1	4260.94	0	0	0	0	0	0	0	0	0	0	0	0	0	0	0	0	0	0	0	30	13	11	9	8	5	11	18	16	18	56	47	101	82	425	738	784	1077	694	117	0
Angola	Shrimps and prawns, not frozen, nei	Exports	Shrimps and prawns	NA	NA	Crustacean	Crustacean	1	6274	0	0	0	0	0	0	0	0	0	0	0	0	0	0	0	0	0	0	0	0	0	0	0	0	0	0	0	0	0	0	0	0	0	0	0	0	0	0	0	0
Angola	Shrimps and prawns, not frozen, nei	Imports	Shrimps and prawns	NA	NA	Crustacean	Crustacean	1	267	0	0	0	0	0	0	0	0	0	0	0	0	0	0	0	0	0	0	0	0	0	0	0	0	0	0	0	0	2	0	0	1	3	2	5	6	14	12	127	44
Angola	Shrimps and prawns, other than coldwater, even smoked, frozen	Exports	Shrimps and prawns	Smoked	NA	Crustacean	Crustacean	2	7378.34	0	0	0	0	0	0	0	0	0	0	0	0	0	0	0	0	0	0	0	0	0	0	0	0	0	0	0	0	0	0	0	0	0	0	0	0	0	0	0	0
Angola	Shrimps and prawns, other than coldwater, even smoked, frozen	Imports	Shrimps and prawns	Smoked	NA	Crustacean	Crustacean	2	5559.34	0	0	0	0	0	0	0	0	0	0	0	0	0	0	0	0	0	0	0	0	0	0	0	0	0	0	0	0	0	0	0	0	0	0	0	0	0	0	2100	1002
Angola	Shrimps and prawns, prep. or pres., in airtight containers	Imports	Shrimps and prawns	Prepared or preserved	NA	Crustacean	Crustacean	2.27	542.485	0	0	0	0	0	0	0	0	0	0	0	0	0	0	0	0	0	0	0	0	0	0	0	0	0	0	0	0	0	0	0	0	0	0	0	0	0	0	106.69	138.47
Angola	Shrimps, prawns, prepared or preserved, nei	Imports	Shrimps and prawns	Prepared or preserved	NA	Crustacean	Crustacean	2.27	426.805	0	0	0	0	0	0	0	0	0	0	0	0	0	0	0	0	0	0	0	2.27	0	4.54	4.54	4.54	0	0	13.62	0	4.54	2.27	6.81	49.94	31.78	40.86	95.34	54.48	68.1	38.59	4.54	0
Angola	Cold-water shrimps and prawns (Pandalus spp., Crangon crangon), frozen, even smoked, whether in shell or not	Exports	Shrimps and prawns (Pandalus spp.)	Smoked	In shell or not	Crustacean	Crustacean	2.42	1328.58	0	0	0	0	0	0	0	0	0	0	0	0	0	0	0	0	0	0	0	0	0	0	0	0	0	0	0	0	0	0	0	0	0	0	0	0	0	0	0	0
Angola	Cold-water shrimps and prawns (Pandalus spp., Crangon crangon), frozen, even smoked, whether in shell or not	Imports	Shrimps and prawns (Pandalus spp.)	Smoked	In shell or not	Crustacean	Crustacean	2.42	774.4	0	0	0	0	0	0	0	0	0	0	0	0	0	0	0	0	0	0	0	0	0	0	0	0	0	0	0	0	0	0	0	0	0	0	0	0	0	0	379.94	145.2
Angola	Miscellaneous demersal fish, nei, frozen	Imports	Demersal fish	Frozen	NA	Demersal fish	Fish	1	266.44	0	0	0	0	0	0	0	0	0	0	0	0	0	0	0	0	0	0	0	0	0	0	0	0	0	0	0	0	0	0	0	0	0	0	0	0	0	0	0	0
Angola	Dogfish and other sharks nei (excl. Squalus acanthias, Scyliorhinus spp., Lamna nasus, Prionace glauca), frozen	Exports	Dogfish and other sharks	Frozen	NA	Dogfish and other sharks	Fish	1	559.23	0	0	0	0	0	0	0	0	0	0	0	0	0	0	0	0	0	0	0	3	2	39	54	54	115	201	73	4	0	0	2	0	0	0	0	0	0	0	0	0
Angola	European plaice, frozen	Imports	European plaice	Frozen	NA	European plaice	Fish	1	103.32	0	0	0	0	0	0	0	0	0	0	0	0	0	0	0	0	0	0	0	0	0	0	3	0	0	0	0	1	0	0	1	1	4	9	9	16	20	9	11	7
Angola	European sardine, frozen	Imports	European sardine	Frozen	NA	European sardine	Fish	1	560.62	0	0	0	0	0	0	0	0	0	0	0	0	0	0	0	0	0	0	0	12	15	128	31	2	11	18	29	46	15	28	57	54	100	0	0	0	0	0	0	0
Angola	European sardine, prepared or preserved, not minced, in oil	Imports	European sardine	Prepared or preserved	Heads-off and gutted	European sardine	Fish	2.66	12385.8	0	0	0	0	0	0	0	0	0	0	0	0	0	0	0	0	0	0	0	1223.6	954.94	1247.54	1159.76	771.4	1577.38	1614.62	311.22	220.78	135.66	180.88	369.74	539.98	2008.3	0	0	0	0	0	0	0
Angola	European sardine, prepared or preserved, not minced, nei	Imports	European sardine	Prepared or preserved	NA	European sardine	Fish	2.66	102752	0	0	0	0	0	0	0	0	13496.8	11914.1	7352.24	4410.28	14824.2	9344.58	7033.04	6665.96	6615.42	5830.72	1351.28	228.76	2125.34	271.32	577.22	273.98	34.58	87.78	82.46	140.98	0	37.24	162.26	74.48	5.32	0	0	0	0	0	0	0
Angola	Fish dried, whether or not salted, nei	Exports	Fish	Dried	NA	Fish	Fish	2.82	413.468	0	0	0	0	0	0	0	0	0	0	0	0	0	0	0	0	0	0	0	0	0	0	0	0	0	0	8.46	11.28	8.46	8.46	19.74	14.1	2.82	2.82	2.82	5.64	8.46	11.28	8.46	8.46
Angola	Fish dried, whether or not salted, nei	Imports	Fish	Dried	NA	Fish	Fish	2.82	167819	0	0	0	0	0	0	0	0	0	524.52	0	0	0	84.6	0	0	318.66	126.9	984.18	0	0	36.66	2.82	16.92	124.08	129.72	39.48	8.46	5.64	2.82	5.64	143.82	56.4	8722.26	10639.9	11559.2	14607.6	51701.9	55900.9	5730.24
Angola	Fish fillets, dried, salted or in brine, nei	Imports	Fish	Dried	Fillets	Fish	Fish	2.82	6015.06	0	0	0	0	0	0	0	0	0	56.4	0	0	0	0	0	0	155.1	0	0	0	16.92	0	0	5.64	62.04	0	0	2.82	84.6	157.92	109.98	64.86	31.02	236.88	109.98	11.28	67.68	56.4	905.22	862.92
Angola	Fish fillets, fresh or chilled, nei	Imports	Fish	Live, fresh or chilled	Fillets	Fish	Fish	1.25	341.25	0	0	0	0	0	0	0	0	0	0	0	0	0	0	0	0	0	0	0	0	0	0	0	3.75	0	0	0	3.75	3.75	0	8.75	0	15	11.25	51.25	2.5	6.25	135	48.75	33.75
Angola	Fish fillets, frozen, nei	Exports	Fish	Frozen	Fillets	Fish	Fish	1.25	125	0	0	0	0	0	0	0	0	0	0	0	0	0	0	0	0	0	0	0	0	0	48.75	68.75	0	1.25	0	0	0	0	0	5	1.25	0	0	0	0	0	0	0	0
Angola	Fish fillets, frozen, nei	Imports	Fish	Frozen	Fillets	Fish	Fish	1.25	8796.25	0	0	0	0	0	0	0	0	0	0	0	0	0	0	0	0	0	0	0	1.25	0	12.5	68.75	15	21.25	86.25	18.75	23.75	30	28.75	170	12.5	155	593.75	2366.25	2247.5	1441.25	1043.75	326.25	62.5
Angola	Fish meat, whether or not minced, frozen, nei	Imports	Fish	Frozen	Meat	Fish	Fish	1.25	1077.55	0	0	0	0	0	0	0	0	0	0	0	0	0	0	0	0	0	0	0	0	0	0	3.75	2.5	8.75	33.75	3.75	10	11.25	10	27.5	123.75	66.25	16.25	8.75	20	45	138.75	112.5	137.5
Angola	Fish meat,whether or not minced, fresh,chilled,frozen, nei	Exports	Fish	Live, fresh or chilled	Meat	Fish	Fish	1.25	140	0	0	0	0	0	0	0	0	0	0	0	0	0	0	0	0	0	0	0	0	0	0	0	0	0	0	140	0	0	0	0	0	0	0	0	0	0	0	0	0
Angola	Fish minced nei, in airtight containers prepared or preserved	Imports	Fish	Prepared or preserved	Minced	Fish	Fish	2.66	1390.75	0	0	0	0	0	0	0	0	0	0	0	0	0	0	0	0	0	0	0	0	0	0	0	0	0	0	0	0	0	0	0	0	0	0	0	0	0	0	0	0
Angola	Fish minced nei, prepared or preserved	Imports	Fish	Prepared or preserved	Minced	Fish	Fish	2.66	16997.2	0	0	0	0	0	0	0	0	0	0	0	0	0	0	0	0	0	0	0	665	0	0	0	0	7.98	42.56	880.46	39.9	42.56	154.28	154.28	933.66	2516.36	686.28	383.04	638.4	2529.66	2473.8	2120.02	1460.34
Angola	Fish nei, prepared or preserved, not minced	Imports	Fish	Prepared or preserved	NA	Fish	Fish	2.66	26226.5	0	0	0	0	0	0	0	0	0	2601.48	0	0	0	574.56	473.48	167.58	1893.92	816.62	1181.04	662.34	582.54	148.96	119.7	18.62	93.1	172.9	21.28	518.7	316.54	1218.28	1622.6	3370.22	4678.94	771.4	1867.32	271.32	191.52	172.9	372.4	90.44
Angola	Fish nei, salted or in brine	Imports	Fish	Salted	NA	Fish	Fish	2.82	12713.9	0	0	0	0	0	0	0	0	0	0	0	0	0	0	0	0	0	0	0	78.96	0	0	39.48	0	107.16	2.82	5.64	2.82	0	2.82	14.1	14.1	0	33.84	2.82	25.38	22.56	70.5	1457.94	2010.66
Angola	Fish nei, smoked	Imports	Fish	Smoked	NA	Fish	Fish	2.5	325.45	0	0	0	0	0	0	0	0	0	0	0	0	0	0	0	0	0	0	0	0	0	2.5	12.5	2.5	2.5	7.5	0	10	25	0	0	15	25	10	27.5	10	35	35	50	20
Angola	Fish, fresh or chilled, nei	Imports	Fish	Live, fresh or chilled	NA	Fish	Fish	1	459	0	0	0	0	0	0	0	0	0	0	0	0	0	0	0	0	0	0	0	0	0	0	12	0	4	7	2	0	0	17	18	9	39	2	1	0	16	94	9	140
Angola	Fish, fresh, chilled or frozen	Exports	Fish	Live, fresh or chilled	NA	Fish	Fish	1	9155	0	0	0	0	0	0	0	0	0	0	0	0	2808	1660	673	466	387	2063	1098	0	0	0	0	0	0	0	0	0	0	0	0	0	0	0	0	0	0	0	0	0
Angola	Fish, fresh, chilled or frozen	Imports	Fish	Live, fresh or chilled	NA	Fish	Fish	1	966242	0	0	0	0	0	0	97292	96926	121137	128488	152115	122669	108315	81300	58000	0	0	0	0	0	0	0	0	0	0	0	0	0	0	0	0	0	0	0	0	0	0	0	0	0
Angola	Fish, frozen, nei	Exports	Fish	Frozen	NA	Fish	Fish	1	1644.83	0	0	0	0	0	0	0	0	0	0	0	0	0	0	0	0	0	0	0	0	0	0	0	0	0	0	2	0	0	0	0	6	14	0	0	0	0	0	0	0
Angola	Fish, frozen, nei	Imports	Fish	Frozen	NA	Fish	Fish	1	215357	0	0	0	0	0	0	0	0	0	0	0	0	0	0	0	0	0	0	0	102	3	1	49	37	624	620	930	758	404	1232	1164	1182	6630	11965	18498	16500	20264	24681	43762	9600
Angola	Flatfish nei, frozen	Exports	Flatfish	Frozen	NA	Flatfish	Fish	1	3581.61	0	0	0	0	0	0	0	0	0	0	0	0	0	0	0	0	0	0	0	74	0	620	477	434	365	785	672	25	32	0	32	55	0	0	0	0	0	0	0	0
Angola	Flatfish nei, frozen	Imports	Flatfish	Frozen	NA	Flatfish	Fish	1	1045.37	0	0	0	0	0	0	0	0	0	0	0	0	0	0	0	0	0	0	0	0	0	1	2	5	1	0	4	7	19	0	0	4	3	2	0	1	32	8	130	207
Angola	Flatfish, fresh or chilled, nei	Exports	Flatfish	Live, fresh or chilled	NA	Flatfish	Fish	1	5828	0	0	0	0	0	0	0	0	0	0	0	0	0	0	0	0	0	0	0	0	0	0	0	0	0	0	0	0	0	0	0	0	0	0	0	0	0	0	0	0
Angola	Flatfish, fresh or chilled, nei	Imports	Flatfish	Live, fresh or chilled	NA	Flatfish	Fish	1	135	0	0	0	0	0	0	0	0	0	0	0	0	0	0	0	0	0	0	0	0	0	0	0	0	0	0	0	0	0	0	0	12	39	0	28	0	0	48	3	2
Angola	Freshwater fish nei, frozen	Imports	Freshwater fish	Frozen	NA	Freshwater fish	Fish	1	554.02	0	0	0	0	0	0	0	0	0	0	0	0	0	0	0	0	0	0	0	0	0	0	0	0	0	0	0	0	0	0	4	24	525	0	0	0	0	0	0	0
Angola	Hake nei fillets, frozen	Imports	Hake	Frozen	Fillets	Hake	Fish	1.25	1489.85	0	0	0	0	0	0	0	0	0	0	0	0	0	0	0	0	0	0	0	0	1.25	0	0	0	2.5	0	0	17.5	17.5	7.5	16.25	46.25	37.5	0	0	0	0	0	596.25	285
Angola	Hakes nei, frozen	Exports	Hake	Frozen	NA	Hake	Fish	1	1001.9	0	0	0	0	0	0	0	0	0	0	0	0	0	0	0	0	0	0	0	0	0	4	0	0	0	0	0	0	0	0	99	133	0	0	0	0	0	0	0	0
Angola	Hakes nei, frozen	Imports	Hake	Frozen	NA	Hake	Fish	1	10532.5	0	0	0	0	0	0	0	0	0	0	0	0	0	0	0	0	0	0	0	1	4	1	6	0	2	4	5	6	4	4	21	20	45	162	240	495	522	568	533	202
Angola	Herrings nei, frozen	Exports	Herring	Frozen	NA	Herring	Fish	1	258.27	0	0	0	0	0	0	0	0	0	0	0	0	0	0	0	0	0	0	0	0	0	0	0	0	0	0	0	0	0	0	0	0	0	0	0	0	0	0	0	0
Angola	Herrings prepared or preserved, not minced, nei	Imports	Herring	Prepared or preserved	NA	Herring	Fish	2.66	760.76	0	0	0	0	0	0	0	0	0	0	0	0	0	0	0	0	0	0	0	0	2.66	0	0	0	0	0	0	0	2.66	2.66	2.66	0	0	23.94	106.4	119.7	0	0	0	478.8
Angola	Jack and horse mackerel prepared or preserved, not minced	Imports	Jack and horse mackerel	Prepared or preserved	NA	Jack and horse mackerel	Fish	2.66	5758.9	0	0	0	0	0	0	0	0	0	0	0	0	0	0	0	0	0	0	0	0	0	0	79.8	0	2.66	82.46	18.62	186.2	1010.8	957.6	790.02	1747.62	883.12	0	0	0	0	0	0	0
Angola	Jack and horse mackerel, frozen	Exports	Jack and horse mackerel	Frozen	NA	Jack and horse mackerel	Fish	1	10502.6	0	0	0	0	0	0	0	0	0	0	0	0	0	0	0	0	0	0	0	0	6	0	0	0	0	0	0	0	0	0	0	0	0	0	0	0	0	0	0	0
Angola	Jack and horse mackerel, frozen	Imports	Jack and horse mackerel	Frozen	NA	Jack and horse mackerel	Fish	1	286832	0	0	0	0	0	0	0	0	0	0	0	0	0	0	0	0	0	0	0	0	0	3	5	0	561	327	613	4438	10961	2435	469	3366	1528	0	0	0	0	0	35744	79089
Angola	Jack and horse mackerels, fresh or chilled	Imports	Jack and horse mackerel	Live, fresh or chilled	NA	Jack and horse mackerel	Fish	1	17481.5	0	0	0	0	0	0	0	0	0	0	0	0	0	0	0	0	0	0	0	0	0	0	0	0	0	0	0	0	0	0	0	0	0	0	0	0	0	0	9172	2322
Angola	Ling, dried, whether or not salted, but not smoked	Imports	Ling	Dried	NA	Ling	Fish	2.82	442.74	0	0	0	0	0	0	0	0	0	0	0	0	0	0	0	0	0	0	0	0	78.96	16.92	0	0	0	0	0	0	0	0	135.36	0	211.5	0	0	0	0	0	0	0
Angola	Mackerel prepared or preserved, not minced, nei	Imports	Mackerel	Prepared or preserved	NA	Mackerel	Fish	2.66	17498.3	0	0	0	0	0	0	0	0	0	0	0	0	0	0	0	0	0	0	0	555.94	10.64	5.32	61.18	31.92	21.28	292.6	0	90.44	34.58	143.64	93.1	319.2	790.02	1995	231.42	3628.24	915.04	851.2	345.8	1537.48
Angola	Mackerels nei, frozen	Exports	Mackerel	Frozen	NA	Mackerel	Fish	1	8859.58	0	0	0	0	0	0	0	0	0	0	0	0	0	0	0	0	0	0	0	0	0	0	0	0	0	1186	2145	373	700	500	203	0	0	0	0	0	0	0	0	0
Angola	Mackerels nei, frozen	Imports	Mackerel	Frozen	NA	Mackerel	Fish	1	207424	0	0	0	0	0	0	0	0	0	0	0	0	0	0	0	0	0	0	0	10	0	1	5	0	1	25	18	2	4	411	6524	8659	6561	13600	22832	32473	69327	38539	8024	4
Angola	Mackerels nei, prep. or pres., not minced, in oil or in brine	Imports	Mackerel	Prepared or preserved	NA	Mackerel	Fish	2.66	11887.5	0	0	0	0	0	0	0	0	0	0	0	1000.16	1963.08	1736.98	1729	1228.92	1330	1436.4	1463	0	0	0	0	0	0	0	0	0	0	0	0	0	0	0	0	0	0	0	0	0
Angola	Mackerels, nei, fresh or chilled	Exports	Mackerel	Live, fresh or chilled	NA	Mackerel	Fish	1	22403	0	0	0	0	0	0	0	0	0	0	0	0	0	0	0	0	0	0	0	0	0	0	0	0	0	0	0	0	0	0	0	0	0	0	0	0	0	0	0	0
Angola	Mackerels, nei, fresh or chilled	Imports	Mackerel	Live, fresh or chilled	NA	Mackerel	Fish	1	738	0	0	0	0	0	0	0	0	0	0	0	0	0	0	0	0	0	0	0	0	0	0	0	0	0	0	0	0	0	0	0	0	643	80	0	5	0	0	0	10
Angola	Marine fish fillets, frozen, nei	Exports	Marine fish	Frozen	Fillets	Marine fish	Fish	1.25	126.25	0	0	0	0	0	0	0	0	0	0	0	0	0	0	0	0	0	0	0	0	0	0	0	0	58.75	28.75	30	7.5	1.25	0	0	0	0	0	0	0	0	0	0	0
Angola	Marine fish, frozen, nei	Exports	Marine fish	Frozen	NA	Marine fish	Fish	1	25648	0	0	0	0	0	0	0	0	0	0	0	0	0	0	0	0	0	0	0	1450	959	2154	2487	1927	1188	6137	2432	3430	2421	932	110	21	0	0	0	0	0	0	0	0
Angola	Nile perch (Lates niloticus) and snakeheads (Channa spp.), frozen	Imports	Nile perch (Lates niloticus) and snakeheads (Channa spp.)	Frozen	NA	Nile perch and snakeheads (Channa spp.)	Fish	1	398.73	0	0	0	0	0	0	0	0	0	0	0	0	0	0	0	0	0	0	0	0	0	0	0	0	0	0	0	0	0	0	0	0	0	6	4	7	49	3	100	56
Angola	Pacific salmons, fresh or chilled	Imports	Pacific salmons	Live, fresh or chilled	NA	Pacific salmons	Fish	1	273	0	0	0	0	0	0	0	0	0	0	0	0	0	0	0	0	0	0	0	0	0	0	0	0	0	0	0	0	0	0	0	0	0	0	0	0	0	0	168	44
Angola	Pacific salmons, frozen, nei	Exports	Pacific salmons	Frozen	NA	Pacific salmons	Fish	1	1346.77	0	0	0	0	0	0	0	0	0	0	0	0	0	0	0	0	0	0	0	0	0	0	0	0	0	0	0	0	0	0	0	0	0	0	0	0	0	0	0	0
Angola	Pacific salmons, frozen, nei	Imports	Pacific salmons	Frozen	NA	Pacific salmons	Fish	1	568.13	0	0	0	0	0	0	0	0	0	0	0	0	0	0	0	0	0	0	0	0	0	0	2	0	0	2	7	41	1	0	0	2	1	50	58	107	85	102	23	46
Angola	Pilchards (Sardinops spp.), prep. or pres., not minced, nei	Imports	Pilchards (Sardinops spp.)	Prepared or preserved	NA	Pilchards (Sardinops spp.)	Fish	2.66	9726.08	0	0	0	0	0	0	0	0	0	0	0	0	0	0	0	0	0	0	835.24	1992.34	957.6	90.44	55.86	0	0	0	1622.6	1037.4	0	340.48	0	774.06	1744.96	0	0	0	0	0	0	0
Angola	Pilchards(Sardinops spp.) and Sardinellas, frozen	Imports	Pilchards (Sardinops spp.) and Sardinellas	Frozen	NA	Pilchards (Sardinops spp.) and Sardinellas	Fish	1	1169.31	0	0	0	0	0	0	0	0	0	0	0	0	0	0	0	0	0	0	0	8	2	5	1	6	14	7	5	2	2	233	312	447	123	0	0	0	0	0	0	0
Angola	Rays and skates (Rajidae), fresh or chilled	Exports	Rays and skates (Rajidae)	Live, fresh or chilled	NA	Rays and skates (Rajidae)	Fish	1	129	0	0	0	0	0	0	0	0	0	0	0	0	0	0	0	0	0	0	0	0	0	0	0	0	0	0	0	0	0	0	0	0	0	0	0	0	0	0	0	0
Angola	Saithe (=Pollock) fillets, frozen	Exports	Saithe (=Pollock)	Frozen	Fillets	Saithe (=Pollock)	Fish	1.25	482.5	0	0	0	0	0	0	0	0	0	0	0	0	0	0	0	0	0	0	0	0	0	0	0	0	0	0	0	0	0	0	0	0	0	0	0	0	0	0	0	0
Angola	Saithe (=Pollock), frozen	Imports	Saithe (=Pollock)	Frozen	NA	Saithe (=Pollock)	Fish	1	437	0	0	0	0	0	0	0	0	0	0	0	0	0	0	0	0	0	0	0	0	0	0	0	0	0	0	0	0	0	0	0	0	378	22	0	19	0	9	0	0
Angola	Saithe, dried, whether or not salted, but not smoked	Imports	Saithe (=Pollock)	Dried	NA	Saithe (=Pollock)	Fish	2.82	32604.8	0	0	0	0	0	0	0	0	0	0	0	0	0	0	0	0	0	0	0	0	304.56	76.14	78.96	2.82	315.84	93.06	609.12	1274.64	2112.18	1993.74	4077.72	6517.02	8068.02	0	0	0	0	0	0	0
Angola	Salmon fillets, frozen	Imports	Salmon	Frozen	Fillets	Salmon	Fish	1.25	196.213	0	0	0	0	0	0	0	0	0	0	0	0	0	0	0	0	0	0	0	0	0	0	0	0	0	0	0	0	0	0	0	10	0	0	0	0	0	0	43.75	13.75
Angola	Salmon nei, not minced, prepared or preserved	Imports	Salmon	Prepared or preserved	NA	Salmon	Fish	2.66	913.816	0	0	0	0	0	0	0	0	0	0	0	0	0	0	0	0	0	0	0	0	0	0	2.66	0	0	2.66	2.66	5.32	172.9	2.66	55.86	377.72	135.66	2.66	5.32	10.64	18.62	15.96	31.92	13.3
Angola	Salmons, smoked	Imports	Salmon	Smoked	NA	Salmon	Fish	2.5	1092.4	0	0	0	0	0	0	0	0	0	0	0	0	0	0	0	0	0	0	0	5	7.5	2.5	12.5	7.5	5	7.5	10	7.5	7.5	12.5	17.5	12.5	10	82.5	62.5	115	102.5	95	145	115
Angola	Salmonoids, fresh or chilled, nei	Exports	Salmonids	Live, fresh or chilled	NA	Salmonids	Fish	1	50974	0	0	0	0	0	0	0	0	0	0	0	0	0	0	0	0	0	0	0	0	0	0	0	0	0	0	0	0	0	0	1000	2500	5000	6000	4500	2748	8700	8200	7000	5326
Angola	Salmonoids, fresh or chilled, nei	Imports	Salmonids	Live, fresh or chilled	NA	Salmonids	Fish	1	536.05	0	0	0	0	0	0	0	0	0	0	0	0	0	0	0	0	0	0	0	0	0	0	0	2	0	0	2	0	1	1	1	22	4	6	140	2	27	41	70	11
Angola	Salmonoids, frozen	Imports	Salmonids	Frozen	NA	Salmonids	Fish	1	594.31	0	0	0	0	0	0	0	0	0	0	0	0	0	0	0	0	0	0	0	0	0	0	0	0	0	0	0	2	1	18	3	6	15	0	0	0	0	0	156	120
Angola	Sardines, sardinellas, brisling or sprats, fresh or chilled	Exports	Sardine, sardinella, sprat	Live, fresh or chilled	NA	Sardine and sardinella and sprat	Fish	1	31957	0	0	0	0	0	0	0	0	0	0	0	0	0	0	0	0	0	0	0	0	0	0	0	0	0	0	0	0	0	0	0	0	0	0	0	0	0	0	0	0
Angola	Sardines, sardinellas, brisling or sprats, fresh or chilled	Imports	Sardine, sardinella, sprat	Live, fresh or chilled	NA	Sardine and sardinella and sprat	Fish	1	817	0	0	0	0	0	0	0	0	0	0	0	0	0	0	0	0	0	0	0	0	0	0	0	0	0	16	1	56	1	12	60	20	15	1	15	50	1	14	450	100
Angola	Sardines, sardinellas, brisling or sprats, frozen	Exports	Sardine, sardinella, sprat	Frozen	NA	Sardine and sardinella and sprat	Fish	1	440.17	0	0	0	0	0	0	0	0	0	0	0	0	0	0	0	0	0	0	0	0	0	0	0	0	0	18	0	0	0	0	0	0	0	0	0	0	0	0	0	0
Angola	Sardines, sardinellas, brisling or sprats, frozen	Imports	Sardine, sardinella, sprat	Frozen	NA	Sardine and sardinella and sprat	Fish	1	3882	0	0	0	0	0	0	0	0	0	0	0	0	0	0	0	0	0	0	0	0	0	0	2	0	0	0	1	1	1	2	1	1	3	780	647	788	639	435	309	89
Angola	Sardines, sardinellas, brisling or sprats, prep. or pres., not minced, nei	Exports	Sardine, sardinella, sprat	Prepared or preserved	NA	Sardine and sardinella and sprat	Fish	2.66	1239.56	0	0	0	0	0	0	0	0	0	0	0	0	0	0	0	0	0	0	0	0	0	0	26.6	0	0	0	0	0	0	0	0	0	0	0	0	0	0	0	0	0
Angola	Sardines, sardinellas, brisling or sprats, prep. or pres., not minced, nei	Imports	Sardine, sardinella, sprat	Prepared or preserved	NA	Sardine and sardinella and sprat	Fish	2.66	698463	0	0	0	0	0	0	0	0	0	0	0	0	0	0	0	0	0	0	0	465.5	340.48	3934.14	273.98	9083.9	8288.56	8990.8	9634.52	6519.66	11823.7	12677.6	18000.2	13411.7	27219.8	19582.9	17117.1	42051.9	82460	81092.8	96863.9	72352
Angola	Seabass, fresh or chilled	Exports	Seabass	Live, fresh or chilled	NA	Seabass	Fish	1	2005	0	0	0	0	0	0	0	0	0	0	0	0	0	0	0	0	0	0	0	0	0	0	0	0	0	0	0	0	0	0	0	0	0	0	0	0	0	0	0	0
Angola	Seabass, fresh or chilled	Imports	Seabass	Live, fresh or chilled	NA	Seabass	Fish	1	104.11	0	0	0	0	0	0	0	0	0	0	0	0	0	0	0	0	0	0	0	0	0	0	0	0	0	0	0	0	0	0	0	0	0	0	0	0	0	0	13	20
Angola	Seabass, frozen	Imports	Seabass	Frozen	NA	Seabass	Fish	1	524.62	0	0	0	0	0	0	0	0	0	0	0	0	0	0	0	0	0	0	0	0	0	0	0	0	0	0	0	0	0	0	0	0	377	0	4	10	26	26	25	9
Angola	Seabreams nei, fresh or chilled	Exports	Seabreams	Live, fresh or chilled	NA	Seabream	Fish	1	546	0	0	0	0	0	0	0	0	0	0	0	0	0	0	0	0	0	0	0	0	0	0	0	0	0	0	0	0	0	0	0	0	0	0	0	0	0	0	0	0
Angola	Seabreams, frozen	Exports	Seabreams	Frozen	NA	Seabream	Fish	1	3651	0	0	0	0	0	0	0	0	0	0	0	0	0	0	0	0	0	0	0	671	2	2	0	359	269	888	748	126	17	348	203	18	0	0	0	0	0	0	0	0
Angola	Seabreams, frozen	Imports	Seabreams	Frozen	NA	Seabream	Fish	1	1407	0	0	0	0	0	0	0	0	0	0	0	0	0	0	0	0	0	0	0	0	0	0	0	0	307	183	363	219	122	100	90	0	23	0	0	0	0	0	0	0
Angola	Skipjack prepared or preserved, not minced, nei	Imports	Skipjack tuna	Prepared or preserved	NA	Skipjack tuna	Fish	2.66	2141.94	0	0	0	0	0	0	0	0	0	0	0	0	0	0	0	0	0	0	0	0	0	0	0	0	0	0	486.78	0	287.28	0	0	0	0	0	0	0	0	0	0	0
Angola	Skipjack tuna, frozen	Exports	Skipjack tuna	Frozen	NA	Skipjack tuna	Fish	1	201	0	0	0	0	0	0	0	0	0	0	0	0	0	0	0	0	0	0	0	0	0	0	0	0	201	0	0	0	0	0	0	0	0	0	0	0	0	0	0	0
Angola	Skipjack tuna, frozen	Imports	Skipjack tuna	Frozen	NA	Skipjack tuna	Fish	1	152	0	0	0	0	0	0	0	0	0	0	0	0	0	0	0	0	0	0	0	0	0	0	0	0	0	0	0	0	0	0	0	0	0	0	26	112	9	0	5	0
Angola	Skipjack, prepared or preserved, whole or in pieces, not minced, in oil	Imports	Skipjack tuna	Prepared or preserved	NA	Skipjack tuna	Fish	2.66	16698.5	0	0	0	0	0	0	0	0	0	5947.76	3394.16	5487.58	0	0	0	654.36	665	0	0	0	0	0	0	0	0	0	0	0	0	0	0	0	0	0	0	0	0	0	0	0
Angola	Sockeye salmon (red salmon)(Oncorhynchus nerka), frozen	Imports	Sockeye salmon	Frozen	NA	Sockeye salmon	Fish	1	357.07	0	0	0	0	0	0	0	0	0	0	0	0	0	0	0	0	0	0	0	0	0	0	0	0	0	0	0	0	0	0	11	4	0	2	8	178	14	16	48	26
Angola	Soles (Solea spp), fresh or chilled, nei	Exports	Soles (Solea spp)	Live, fresh or chilled	NA	Soles (Solea spp)	Fish	1	872	0	0	0	0	0	0	0	0	0	0	0	0	0	0	0	0	0	0	0	0	0	0	0	0	0	0	0	0	0	0	0	0	0	0	0	0	0	0	0	0
Angola	South African pilchard, prep. or pres., not minced	Imports	South African pilchard	Prepared or preserved	NA	South African pilchard	Fish	2.66	913.949	0	0	0	0	0	0	0	0	0	0	0	0	0	0	0	0	0	0	0	436.24	0	0	2.66	0	0	0	0	0	0	13.3	5.32	26.6	417.62	0	0	0	0	0	0	0
Angola	Swordfish, fresh or chilled	Exports	Swordfish	Live, fresh or chilled	NA	Swordfish	Fish	1	1788	0	0	0	0	0	0	0	0	0	0	0	0	0	0	0	0	0	0	0	0	0	0	0	0	0	0	0	0	0	0	0	0	0	0	0	0	0	0	0	0
Angola	Swordfish, frozen	Exports	Swordfish	Frozen	NA	Swordfish	Fish	1	143.81	0	0	0	0	0	0	0	0	0	0	0	0	0	0	0	0	0	0	0	0	0	0	0	0	30	37	0	0	0	0	0	0	0	0	0	0	0	0	0	0
Angola	Tilapia fillets, fresh or chilled	Imports	Tilapia	Live, fresh or chilled	Fillets	Tilapia	Fish	1.25	998.75	0	0	0	0	0	0	0	0	0	0	0	0	0	0	0	0	0	0	0	0	0	0	0	0	0	0	0	0	0	0	0	0	0	0	0	0	0	0	406.25	181.25
Angola	Tilapia fillets, frozen	Imports	Tilapia	Frozen	Fillets	Tilapia	Fish	1.25	202.537	0	0	0	0	0	0	0	0	0	0	0	0	0	0	0	0	0	0	0	0	0	0	0	0	0	0	0	0	1.25	7.5	0	0	0	0	0	0	0	0	75	3.75
Angola	Tilapias prepared or preserved, not minced	Imports	Tilapia	Prepared or preserved	NA	Tilapia	Fish	2.66	1251.26	0	0	0	0	0	0	0	0	0	0	0	0	0	0	0	0	0	0	0	0	0	0	0	0	0	0	0	0	0	0	0	0	0	0	0	0	0	0	0	0
Angola	Tilapias, fresh or chilled	Imports	Tilapia	Live, fresh or chilled	NA	Tilapia	Fish	1	723	0	0	0	0	0	0	0	0	0	0	0	0	0	0	0	0	0	0	0	0	0	0	0	0	0	0	0	0	0	0	0	0	0	0	0	0	0	0	168	0
Angola	Tilapias, frozen	Imports	Tilapia	Frozen	NA	Tilapia	Fish	1	125886	0	0	0	0	0	0	0	0	0	0	0	0	0	0	0	0	0	0	0	0	0	0	0	0	0	0	0	22	71	188	439	363	452	0	0	0	0	0	47009	32528
Angola	Tilapia, catfish, carp, eel, Nile perch and snakeheads, fillets, dried/salted/brine, not smoked	Imports	Tilapias, catfish, carp, eels, Nile perch and snakeheads	Dried	Fillets	Tilapia and catfish and carp	Fish	2.82	1060.32	0	0	0	0	0	0	0	0	0	0	0	0	0	0	0	0	0	0	0	0	0	0	0	0	0	0	0	0	0	0	0	0	0	0	0	0	0	0	1040.58	0
Angola	Tilapias, catfish, carp, eels, Nile perch and snakeheads meat, frozen	Imports	Tilapias, catfish, carp, eels, Nile perch and snakeheads	Frozen	Meat	Tilapia and catfish and carp	Fish	1.25	397.5	0	0	0	0	0	0	0	0	0	0	0	0	0	0	0	0	0	0	0	0	0	0	0	0	0	0	0	0	0	0	0	0	0	0	0	0	0	0	1.25	20
Angola	Tunas nei, frozen	Exports	Tuna	Frozen	NA	Tuna	Fish	1	191	0	0	0	0	0	0	0	0	0	0	0	0	0	0	0	0	0	0	0	0	0	0	0	0	72	2	0	0	0	0	117	0	0	0	0	0	0	0	0	0
Angola	Tunas nei, frozen	Imports	Tuna	Frozen	NA	Tuna	Fish	1	724.27	0	0	0	0	0	0	0	0	0	0	0	0	0	0	0	0	0	0	0	0	0	0	0	0	0	0	0	0	0	0	1	0	28	28	33	100	17	8	119	7
Angola	Tunas prepared or preserved, not minced, in airtight containers	Imports	Tuna	Prepared or preserved	NA	Tuna	Fish	2.66	902.272	0	0	0	0	0	0	0	0	0	0	0	0	0	0	0	0	0	0	0	0	0	0	0	0	0	0	0	0	0	0	0	0	0	0	0	0	0	0	0	0
Angola	Tunas prepared or preserved, not minced, in oil	Imports	Tuna	Prepared or preserved	NA	Tuna	Fish	2.66	5854.71	0	0	0	0	0	0	0	0	0	2862.16	587.86	1197	1045.38	0	0	0	0	0	0	0	0	5.32	7.98	5.32	15.96	0	0	0	0	0	0	0	0	0	0	0	0	0	0	0
Angola	Tunas prepared or preserved, not minced, nei	Imports	Tuna	Prepared or preserved	NA	Tuna	Fish	2.66	252793	0	0	0	0	0	0	0	0	1484.28	1489.6	904.4	1218.28	1330	4615.1	1707.72	970.9	853.86	694.26	1279.46	768.74	1114.54	1018.78	2409.96	2093.42	4000.64	3325	1452.36	3708.04	2774.38	5567.38	11456.6	3928.82	4753.42	21671	14020.9	29871.8	35644	21080.5	19950	9044
Angola	Tusk, dried, whether or not salted, but not smoked	Imports	Tusk	Dried	NA	Tusk	Fish	2.82	356.166	0	0	0	0	0	0	0	0	0	0	0	0	0	0	0	0	0	0	0	0	95.88	0	0	0	0	33.84	0	0	0	5.64	0	0	0	0	0	0	0	0	0	0
Angola	Yellowfin tuna, frozen, nei	Exports	Yellowfin tuna	Frozen	NA	Yellowfin tuna	Fish	1	597.55	0	0	0	0	0	0	0	0	0	0	0	0	0	0	0	0	0	0	0	0	0	0	0	0	560	0	0	0	19	0	0	0	0	0	0	0	0	0	0	0
Argentina	Albacore (=Longfin tuna), frozen, nei	Imports	Albacore	Frozen	NA	Albacore	Fish	1	592	0	0	0	0	0	0	0	0	0	0	129	36	0	302	0	0	23	2	12	0	6	0	25	18	0	0	0	0	0	0	0	2	13	14	0	0	4	6	0	0
Argentina	Anchovies fillets, prepared or preserved	Exports	Anchovy	Prepared or preserved	Fillets	Anchovy	Fish	2.66	21865.2	1952.44	3575.04	1782.2	915.04	654.36	367.08	452.2	441.56	805.98	1846.04	356.44	962.92	1529.5	1431.08	1337.98	154.28	0	0	0	0	0	0	0	0	0	0	0	0	0	0	0	0	1393.84	529.34	702.24	675.64	0	0	0	0
Argentina	Anchovies, frozen	Exports	Anchovy	Frozen	NA	Anchovy	Fish	1	13625	0	0	0	0	0	0	0	0	0	0	0	0	0	0	0	0	0	0	0	0	0	0	0	0	0	656	852	2458	1131	1625	2267	339	996	894	958	427	356	412	180	52
Argentina	Anchovies, prepared or preserved, not minced	Exports	Anchovy	Prepared or preserved	NA	Anchovy	Fish	2.66	18087.4	0	0	0	0	0	0	0	0	0	0	0	0	0	0	0	0	2.66	0	2.66	23.94	26.6	39.9	82.46	109.06	194.18	582.54	601.16	744.8	1234.24	1755.6	1896.58	2032.24	454.86	555.94	1207.64	1141.14	1510.88	1415.12	734.16	545.3
Argentina	Anchovies, prepared or preserved, not minced	Imports	Anchovy	Prepared or preserved	NA	Anchovy	Fish	2.66	500.08	0	0	0	0	5.32	0	0	0	0	0	0	0	0	0	0	0	13.3	31.92	15.96	5.32	5.32	15.96	23.94	39.9	164.92	13.3	0	0	0	0	0	31.92	0	0	119.7	0	0	0	5.32	0
Argentina	Anchovies, salted or in brine	Exports	Anchovy	Salted	NA	Anchovy	Fish	2.82	827544	0	7179.72	1940.16	1875.3	4963.2	2969.46	1833	1257.72	0	0	7284.06	10916.2	20174.3	23143.7	16748	16212.2	19274.7	24559.4	25050.1	23989.7	25092.4	22833.5	33120.9	21987.5	18158	18755.8	17656	40585.4	49770.2	49553	36369.5	31617.8	33518.5	26606.7	41970.1	31383.8	23933.3	18392	20625.5	13770.1
Argentina	Anchovies, salted or in brine	Imports	Anchovy	Salted	NA	Anchovy	Fish	2.82	1078.76	0	0	0	0	0	0	0	0	0	0	0	0	0	0	0	0	0	0	0	0	0	0	0	50.76	169.2	377.88	0	47.94	0	0	0	70.5	0	0	0	0	0	59.22	62.04	0
Argentina	Argentine hake, fresh or chilled	Exports	Argentine hake	Live, fresh or chilled	NA	Argentine hake	Fish	1	110852	0	0	0	0	0	0	0	0	0	0	0	0	0	0	0	0	0	0	0	0	0	0	5388	7365	3483	3976	5796	8651	11655	7710	6938	7387	5391	6188	8295	7005	5605	4759	3626	1614
Argentina	Argentinian hake fillets, fresh or chilled	Exports	Argentine hake	Live, fresh or chilled	Fillets	Argentine hake	Fish	1.25	530	0	0	0	0	0	0	0	0	0	0	0	0	0	0	0	0	0	0	0	0	0	0	0	0	0	0	0	62.5	55	63.75	103.75	80	62.5	8.75	72.5	21.25	0	0	0	0
Argentina	Argentinian hake fillets, frozen	Exports	Argentine hake	Frozen	Fillets	Argentine hake	Fish	1.25	2.1621e+06	41608.8	67491.2	71428.8	87172.5	54345	32715	45375	44375	26500	51561.2	0	0	0	0	0	0	0	0	0	0	0	0	0	0	0	0	0	71447.5	144076	134145	140242	115979	94497.5	116415	111385	93627.5	73398.8	83717.5	86873.8	68107.5
Argentina	Argentinian hake, frozen	Exports	Argentine hake	Frozen	NA	Argentine hake	Fish	1	1.88388e+06	41798	35799	26695	30300	29689	26300	37600	40200	34100	30541	36488	37346	37398	39022	61171	65932	46083	61802	76174	85200	80636	95131	48099	44769	12994	16725	38557	35194	42668	35627	39702	32364	31466	43031	41796	44575	44343	43791	40654	39336
Argentina	Atlantic cod, frozen	Exports	Atlantic cod	Frozen	NA	Atlantic cod	Fish	1	471	0	0	0	0	0	0	0	0	0	0	0	0	0	0	0	471	0	0	0	0	0	0	0	0	0	0	0	0	0	0	0	0	0	0	0	0	0	0	0	0
Argentina	Atlantic and Danube salmons, fresh or chilled	Imports	Atlantic salmon and Danube salmon	Live, fresh or chilled	NA	Atlantic salmon and Danube salmon	Fish	1	44194.7	0	0	0	0	0	0	0	0	0	0	0	0	0	0	0	0	0	0	0	0	0	0	0	0	0	0	0	0	0	0	0	0	0	0	0	0	4104	4949	4828	5682
Argentina	Atlantic salmon and Danube salmon, frozen	Exports	Atlantic salmon and Danube salmon	Frozen	NA	Atlantic salmon and Danube salmon	Fish	1	814	0	0	0	0	0	0	0	0	0	0	0	0	0	0	0	0	374	150	55	53	79	15	10	4	9	5	16	4	14	0	14	5	7	0	0	0	0	0	0	0
Argentina	Atlantic salmon and Danube salmon, frozen	Imports	Atlantic salmon and Danube salmon	Frozen	NA	Atlantic salmon and Danube salmon	Fish	1	3855.29	0	0	0	0	0	0	0	0	0	0	0	0	0	0	0	0	13	52	90	101	69	151	228	396	393	265	88	44	87	98	222	73	80	367	117	149	193	59	43	40
Argentina	Bastard halibut fillets, fresh or chilled	Exports	Bastard halibut	Live, fresh or chilled	Fillets	Bastard halibut	Fish	1.25	545	0	0	0	0	0	0	0	0	0	0	0	0	0	0	0	0	0	0	0	0	0	0	0	0	0	0	0	0	0	0	0	0	45	170	195	135	0	0	0	0
Argentina	Bastard halibut fillets, frozen	Exports	Bastard halibut	Frozen	Fillets	Bastard halibut	Fish	1.25	9481.25	0	0	0	0	0	0	0	0	0	0	0	0	0	0	0	0	0	0	0	0	0	0	0	0	0	0	0	0	0	0	0	0	802.5	2673.75	2955	3050	0	0	0	0
Argentina	Bastard halibut, frozen	Exports	Bastard halibut	Frozen	NA	Bastard halibut	Fish	1	101	0	0	0	0	0	0	0	0	0	0	0	0	0	0	0	0	0	0	0	0	0	0	0	0	0	0	0	0	0	0	0	0	52	20	29	0	0	0	0	0
Argentina	Blue whitings (Micromesistius poutassou, Micromesistius australis), frozen	Exports	Blue whitings	Frozen	NA	Blue whitings	Fish	1	1427	0	0	0	0	0	0	0	0	0	0	0	0	0	0	0	0	0	0	0	0	0	0	0	0	0	0	0	0	0	0	0	0	0	0	0	0	144	77	124	299
Argentina	Carps, frozen	Exports	Carps	Frozen	NA	Carps	Fish	1	397	0	0	0	0	0	0	0	0	0	0	0	0	0	0	0	0	0	0	0	0	0	0	0	0	0	0	0	0	0	0	0	0	0	0	0	0	48	104	168	36
Argentina	Carps, eels and snakeheads, fillets, frozen	Exports	Carps, eels and snakeheads	Frozen	Fillets	Carps and eels and snakeheads	Fish	1.25	385	0	0	0	0	0	0	0	0	0	0	0	0	0	0	0	0	0	0	0	0	0	0	0	0	0	0	0	0	0	0	0	0	0	0	0	0	17.5	40	91.25	46.25
Argentina	Catfish fillets, frozen	Imports	Catfish	Frozen	Fillets	Catfish	Fish	1.25	524.375	0	0	0	0	0	0	0	0	0	0	0	0	0	0	0	0	0	0	0	0	0	0	0	0	0	0	0	0	0	0	0	0	0	0	0	0	0	0	0	0
Argentina	Cephalopods nei, frozen	Imports	Cephalopod	Frozen	NA	Cephalopod	Cephalopod	1	4172	574	1857	1512	229	0	0	0	0	0	0	0	0	0	0	0	0	0	0	0	0	0	0	0	0	0	0	0	0	0	0	0	0	0	0	0	0	0	0	0	0
Argentina	Cephalopods, prepared or preserved, nei	Exports	Cephalopod	Prepared or preserved	NA	Cephalopod	Cephalopod	2.66	279.3	0	0	0	0	0	0	0	0	0	0	0	0	7.98	13.3	258.02	0	0	0	0	0	0	0	0	0	0	0	0	0	0	0	0	0	0	0	0	0	0	0	0	0
Argentina	Cuttlefish and squid, prepared or preserved	Imports	Cuttlefish and squid	Prepared or preserved	NA	Cephalopod	Cephalopod	2.66	1133.77	0	0	0	0	0	0	0	0	0	0	0	0	0	0	0	0	0	0	0	0	0	0	0	0	0	0	0	0	0	0	0	0	0	0	0	0	622.44	53.2	39.9	55.86
Argentina	Cuttlefishes and squids, frozen, nei	Exports	Cuttlefish and squid	Frozen	NA	Cephalopod	Cephalopod	1	176904	0	0	0	0	0	0	0	0	0	0	0	0	0	0	0	0	0	0	0	0	0	0	0	0	0	0	0	0	0	0	0	0	0	0	0	0	0	0	0	0
Argentina	Cuttlefishes and squids, frozen, nei	Imports	Cuttlefish and squid	Frozen	NA	Cephalopod	Cephalopod	1	1795.74	0	0	0	0	0	0	0	0	0	0	0	0	0	0	0	0	0	0	0	0	0	0	0	0	0	0	0	0	0	0	0	0	0	0	0	0	0	0	0	0
Argentina	Cuttlefishes and squids, live, fresh or chilled, nei	Exports	Cuttlefish and squid	Live, fresh or chilled	NA	Cephalopod	Cephalopod	1	1012	0	0	0	0	0	0	0	0	0	0	0	0	0	0	0	0	1005	0	0	1	1	1	0	0	0	0	0	0	4	0	0	0	0	0	0	0	0	0	0	0
Argentina	Octopus, frozen	Imports	Octopus	Frozen	NA	Cephalopod	Cephalopod	1	29453.1	0	0	0	663	937	1418	700	555	950	1320	803	655	646	520	372	594	841	1225	1469	995	1035	1257	1302	1364	1490	1228	87	211	194	335	258	354	461	446	519	512	580	454	405	476
Argentina	Octopus, live, fresh or chilled	Imports	Octopus	Live, fresh or chilled	NA	Cephalopod	Cephalopod	1	267	0	0	0	0	0	0	0	0	0	0	0	0	0	0	0	0	260	0	0	0	0	2	5	0	0	0	0	0	0	0	0	0	0	0	0	0	0	0	0	0
Argentina	Octopus, prepared or preserved	Imports	Octopus	Prepared or preserved	NA	Cephalopod	Cephalopod	2.66	345.8	0	0	0	0	29.26	18.62	2.66	0	0	0	0	2.66	0	0	0	0	117.04	79.8	50.54	0	0	0	0	0	0	0	0	0	0	0	0	0	0	0	0	0	18.62	10.64	7.98	0
Argentina	Squid rings, frozen	Exports	Squid	Frozen	Rings	Cephalopod	Cephalopod	1.25	21750	0	0	0	0	0	0	0	0	0	0	1381.25	9781.25	3435	4508.75	2643.75	0	0	0	0	0	0	0	0	0	0	0	0	0	0	0	0	0	0	0	0	0	0	0	0	0
Argentina	Squids (Illex spp.), frozen	Exports	Squid	Frozen	NA	Cephalopod	Cephalopod	1	2600064	0	0	0	0	0	0	0	0	0	0	0	0	0	0	0	0	0	0	0	53998	239690	304463	215858	55598	81427	122967	102552	84302	51623	92353	176360	149391	174084	53745	53924	51669	68381	130277	120036	94530
Argentina	Squids nei, frozen	Exports	Squid	Frozen	NA	Cephalopod	Cephalopod	1	886785	3221	913	48014	61804	9593	6527	30859	22235	19927	14555	9234	24172	7793	13675	14869	41114	55320	179660	184029	130957	5217	461	345	241	190	433	79	252	174	493	72	38	54	87	34	56	62	6	4	6
Argentina	Squids nei, frozen	Imports	Squid	Frozen	NA	Cephalopod	Cephalopod	1	14709.2	0	0	0	666	111	565	239	101	0	0	152	28	273	359	225	1526	720	421	485	602	218	277	172	283	218	283	83	93	102	288	190	453	619	601	819	458	561	527	326	358
Argentina	Squids, dried, salted or in brine, smoked	Exports	Squid	Dried	NA	Cephalopod	Cephalopod	2.82	3877.5	0	0	0	0	0	0	0	0	0	0	146.64	31.02	462.48	1497.42	1229.52	0	0	0	0	352.5	5.64	152.28	0	0	0	0	0	0	0	0	0	0	0	0	0	0	0	0	0	0
Argentina	Squids, live,fresh or chilled, nei	Exports	Squid	Live, fresh or chilled	NA	Cephalopod	Cephalopod	1	113	0	0	0	0	0	0	0	0	0	0	0	105	8	0	0	0	0	0	0	0	0	0	0	0	0	0	0	0	0	0	0	0	0	0	0	0	0	0	0	0
Argentina	Squids, prepared or preserved, nei	Exports	Squid	Prepared or preserved	NA	Cephalopod	Cephalopod	2.66	1040.06	0	0	0	0	0	0	0	0	0	0	5.32	0	0	0	0	0	0	0	0	0	0	0	0	0	0	0	0	0	0	0	0	0	428.26	484.12	122.36	0	0	0	0	0
Argentina	Squids, prepared or preserved, nei	Imports	Squid	Prepared or preserved	NA	Cephalopod	Cephalopod	2.66	970.9	0	0	0	0	69.16	29.26	2.66	0	0	0	2.66	7.98	2.66	0	0	2.66	273.98	260.68	319.2	0	0	0	0	0	0	0	0	0	0	0	0	0	0	0	0	0	0	0	0	0
Argentina	Miscellaneous coastal fish, fillets, fresh or chilled, nei	Exports	Coastal fish	Live, fresh or chilled	Fillets	Coastal fish	Fish	1.25	3571.25	0	0	0	0	0	0	0	0	0	0	0	0	0	0	0	0	0	0	0	0	0	0	0	0	0	0	143.75	290	455	603.75	307.5	217.5	520	498.75	367.5	110	8.75	46.25	2.5	0
Argentina	Miscellaneous coastal fish, nei, frozen	Exports	Coastal fish	Frozen	NA	Coastal fish	Fish	1	7889	0	0	0	0	0	0	0	0	0	0	0	0	0	0	0	5892	0	0	0	0	0	0	0	0	0	0	31	24	202	143	145	19	31	17	20	148	180	376	337	115
Argentina	Miscellaneous coastal fishes fillets, frozen, nei	Exports	Coastal fish	Frozen	Fillets	Coastal fish	Fish	1.25	47402.5	0	0	0	0	0	0	0	0	0	0	0	0	0	0	0	0	0	0	0	0	0	0	0	0	0	0	430	773.75	1076.25	1130	1751.25	10853.8	17678.8	5725	4203.75	3326.25	118.75	98.75	53.75	36.25
Argentina	Miscellaneous coastal fishes,nei, fresh or chilled	Exports	Coastal fish	Live, fresh or chilled	NA	Coastal fish	Fish	1	2583	0	0	0	0	0	0	0	0	0	0	0	0	0	0	0	0	0	0	0	0	0	0	0	0	0	0	24	30	23	21	50	33	227	954	741	410	6	0	10	15
Argentina	Cods nei, dried, whether or not salted	Imports	Cod	Dried	NA	Cod	Fish	2.82	16378.6	115.62	690.9	933.42	2822.82	1813.26	1091.34	411.72	0	0	0	0	0	5.64	0	70.5	307.38	651.42	437.1	685.26	778.32	902.4	944.7	1229.52	454.02	445.56	245.34	90.24	39.48	59.22	118.44	143.82	143.82	205.86	115.62	177.66	81.78	50.76	28.2	31.02	14.1
Argentina	Cods nei, frozen	Exports	Cod	Frozen	NA	Cod	Fish	1	170	0	0	0	0	0	0	0	0	0	0	0	0	0	0	0	0	44	75	35	16	0	0	0	0	0	0	0	0	0	0	0	0	0	0	0	0	0	0	0	0
Argentina	Cods nei, frozen	Imports	Cod	Frozen	NA	Cod	Fish	1	102	0	0	0	0	0	0	0	0	0	0	0	0	0	0	0	0	0	28	53	0	0	10	0	0	0	0	0	0	0	0	0	0	1	0	3	1	0	5	0	0
Argentina	Cods nei, salted or in brine	Imports	Cod	Salted	NA	Cod	Fish	2.82	3486.2	0	0	0	225.6	259.44	950.34	1204.14	73.32	0	0	0	234.06	31.02	126.9	141	70.5	0	22.56	53.58	33.84	25.38	11.28	0	0	0	0	0	0	0	0	0	0	0	0	0	0	0	0	0	0
Argentina	Gadiformes excl. Alaska pollock, meat, whether or not minced, frozen	Exports	Cod and hake and haddock	Frozen	Meat	Cod and hake and haddock	Fish	1.25	89233.4	0	0	0	0	0	0	0	0	0	0	0	0	0	0	0	0	0	0	0	0	0	0	0	0	0	0	0	0	0	0	0	0	0	0	0	0	12596.2	9686.25	9701.25	13686.2
Argentina	Gadiformes excl. Alaska pollock, meat, whether or not minced, frozen	Imports	Cod and hake and haddock	Frozen	Meat	Cod and hake and haddock	Fish	1.25	125	0	0	0	0	0	0	0	0	0	0	0	0	0	0	0	0	0	0	0	0	0	0	0	0	0	0	0	0	0	0	0	0	0	0	0	0	48.75	61.25	0	0
Argentina	Gadiformes fillets, fresh or chilled, nei	Exports	Cod and hake and haddock	Live, fresh or chilled	Fillets	Cod and hake and haddock	Fish	1.25	2571.91	0	0	0	0	0	0	0	0	0	0	0	0	0	0	0	0	0	0	0	0	0	0	0	0	0	0	0	0	0	0	0	0	0	0	0	0	0	553.75	650	345
Argentina	Gadiformes nei, frozen	Exports	Cod and hake and haddock	Frozen	NA	Cod and hake and haddock	Fish	1	11347.8	0	0	0	0	0	0	0	0	0	0	0	0	0	0	0	0	0	0	0	0	0	0	0	0	0	0	0	0	0	0	0	0	0	0	0	0	2427	1383	1737	1616
Argentina	Gadiformes, meat, fresh or chilled, nei	Exports	Cod and hake and haddock	Live, fresh or chilled	Meat	Cod and hake and haddock	Fish	1.25	337.5	0	0	0	0	0	0	0	0	0	0	0	0	0	0	0	0	0	0	0	0	0	0	0	0	0	0	0	0	0	0	0	0	52.5	82.5	92.5	67.5	12.5	16.25	6.25	2.5
Argentina	Common sole (Solea Solea), fresh or chilled	Exports	Common sole (Solea Solea)	Live, fresh or chilled	NA	Common sole	Fish	1	528	0	0	0	0	0	0	0	0	0	0	0	0	0	0	0	19	2	4	4	27	117	144	61	72	8	16	7	17	4	11	11	2	0	1	1	0	0	0	0	0
Argentina	Common sole (Solea Solea), frozen	Exports	Common sole (Solea Solea)	Frozen	NA	Common sole	Fish	1	809	0	0	0	0	0	0	0	0	0	0	0	0	0	0	0	0	231	12	4	16	57	34	29	15	2	57	40	23	98	90	87	6	0	4	2	0	0	2	0	0
Argentina	Croakers, frozen	Exports	Croaker	Frozen	NA	Croaker	Fish	1	578955	0	0	0	0	0	0	0	16761	3469	0	0	0	0	0	0	0	0	0	0	15520	19894	21172	14490	8818	7174	6503	5278	12000	12343	22563	28729	30148	24463	37283	28011	35660	35170	40249	35517	27767
Argentina	Croakers, frozen	Imports	Croaker	Frozen	NA	Croaker	Fish	1	115	0	0	0	0	0	0	0	0	0	0	0	0	0	0	0	0	0	0	0	0	0	12	0	0	0	0	0	34	56	11	0	0	0	0	0	2	0	0	0	0
Argentina	Crab meat nei, prepared or preserved	Exports	Crab	Prepared or preserved	Meat	Crustacean	Crustacean	5.9701	2985.05	0	0	0	0	0	0	0	0	0	0	0	0	0	0	0	0	0	0	0	0	0	268.654	167.163	191.043	173.133	113.432	185.073	167.163	268.654	304.475	405.967	298.505	173.133	262.684	0	0	0	0	5.9701	0
Argentina	Crab meat nei, prepared or preserved	Imports	Crab	Prepared or preserved	Meat	Crustacean	Crustacean	5.9701	644.771	0	0	0	0	0	0	0	0	0	0	0	0	0	0	0	0	5.9701	47.7608	59.701	17.9103	107.462	131.342	77.6113	83.5814	35.8206	17.9103	0	0	17.9103	11.9402	17.9103	0	0	5.9701	5.9701	0	0	0	0	0
Argentina	Crabs nei, frozen	Exports	Crab	Frozen	NA	Crustacean	Crustacean	1	20191.3	0	0	0	0	0	0	0	0	0	0	0	0	0	0	0	0	0	0	0	0	0	0	0	7	15	11	140	557	334	167	336	293	397	282	387	1878	2452	2413	2335	2195
Argentina	Crabs nei, frozen	Imports	Crab	Frozen	NA	Crustacean	Crustacean	1	100.68	0	0	0	0	0	0	0	0	0	0	0	0	0	0	0	0	0	0	0	0	0	0	0	0	0	1	0	0	0	88	0	0	0	0	0	0	0	0	0	0
Argentina	King crab, nei, frozen	Exports	Crab	Frozen	NA	Crustacean	Crustacean	1	238	0	0	0	0	0	0	0	0	0	0	54	8	67	1	95	13	0	0	0	0	0	0	0	0	0	0	0	0	0	0	0	0	0	0	0	0	0	0	0	0
Argentina	Crustaceans nei, even smoked, frozen	Exports	Crustaceans	Smoked	NA	Crustacean	Crustacean	2	6360	0	0	0	0	0	0	0	0	0	0	0	0	402	0	4	0	2	0	14	20	88	142	42	5642	0	0	0	2	2	0	0	0	0	0	0	0	0	0	0	0
Argentina	Crustaceans nei, prepared or preserved	Exports	Crustaceans	Prepared or preserved	NA	Crustacean	Crustacean	2.27	1293.9	0	0	0	0	0	0	0	0	0	0	38.59	22.7	20.43	27.24	9.08	65.83	0	11.35	0	83.99	0	0	4.54	0	0	0	4.54	74.91	95.34	690.08	65.83	29.51	18.16	6.81	2.27	0	0	22.7	0	0
Argentina	Crustaceans nei, prepared or preserved	Imports	Crustaceans	Prepared or preserved	NA	Crustacean	Crustacean	2.27	456.27	0	0	0	0	0	0	0	0	0	0	0	0	0	0	0	0	6.81	36.32	38.59	61.29	74.91	172.52	36.32	18.16	2.27	0	0	0	0	2.27	2.27	2.27	0	0	0	0	0	0	0	0
Argentina	Crustaceans and molluscs, fresh, frozen, dried, salted, etc.	Exports	Crustaceans and molluscs	Dried	NA	Crustacean	Crustacean	2.54	14406.9	5.08	0	0	0	0	840.74	13561.1	0	0	0	0	0	0	0	0	0	0	0	0	0	0	0	0	0	0	0	0	0	0	0	0	0	0	0	0	0	0	0	0	0
Argentina	Crustaceans and molluscs, fresh, frozen, dried, salted, etc.	Imports	Crustaceans and molluscs	Dried	NA	Crustacean	Crustacean	2.54	3073.4	185.42	817.88	1049.02	1021.08	0	0	0	0	0	0	0	0	0	0	0	0	0	0	0	0	0	0	0	0	0	0	0	0	0	0	0	0	0	0	0	0	0	0	0	0
Argentina	Crustaceans and molluscs, nei, fresh or chilled	Imports	Crustaceans and molluscs	Live, fresh or chilled	NA	Crustacean	Crustacean	1	114	0	0	0	2	38	1	0	0	0	0	0	22	23	12	5	11	0	0	0	0	0	0	0	0	0	0	0	0	0	0	0	0	0	0	0	0	0	0	0	0
Argentina	Crustaceans and molluscs, nei, frozen	Exports	Crustaceans and molluscs	Frozen	NA	Crustacean	Crustacean	1	1421	0	0	0	0	0	0	0	0	0	0	73	10	51	87	1200	0	0	0	0	0	0	0	0	0	0	0	0	0	0	0	0	0	0	0	0	0	0	0	0	0
Argentina	Crustaceans and molluscs, nei, frozen	Imports	Crustaceans and molluscs	Frozen	NA	Crustacean	Crustacean	1	1846	0	0	0	157	239	124	88	68	0	0	332	376	205	54	53	150	0	0	0	0	0	0	0	0	0	0	0	0	0	0	0	0	0	0	0	0	0	0	0	0
Argentina	Crustaceans and molluscs, prepared or preserved, nei	Exports	Crustaceans and molluscs	Prepared or preserved	NA	Crustacean	Crustacean	2.27	1602.62	340.5	177.06	199.76	245.16	251.97	77.18	174.79	108.96	0	0	0	0	2.27	6.81	18.16	0	0	0	0	0	0	0	0	0	0	0	0	0	0	0	0	0	0	0	0	0	0	0	0	0
Argentina	Crustaceans and molluscs, prepared or preserved, nei	Imports	Crustaceans and molluscs	Prepared or preserved	NA	Crustacean	Crustacean	2.27	1053.28	6.81	49.94	460.81	265.59	45.4	27.24	0	0	2.27	31.78	4.54	2.27	0	0	0	2.27	13.62	34.05	106.69	0	0	0	0	0	0	0	0	0	0	0	0	0	0	0	0	0	0	0	0	0
Argentina	Rock lobster and other sea crawfish (Palinurus, Panulirus, Jasus), even smoked, frozen, nei	Imports	Lobster	Smoked	NA	Crustacean	Crustacean	2	446	0	0	0	0	0	0	0	0	0	0	0	0	0	0	0	0	14	6	20	10	38	38	64	38	38	26	2	14	6	2	4	4	4	6	10	14	8	8	16	8
Argentina	Shrimps and prawns, frozen, nei	Exports	Shrimps and prawns	Frozen	NA	Crustacean	Crustacean	1	780798	0	0	0	0	0	0	7365	19498	21527	12370	11118	2250	10795	9186	7425	9108	20385	25570	15453	6883	8846	5147	22708	16094	32806	61679	52313	47078	27480	6955	39152	44898	42961	51788	64208	77752	0	0	0	0
Argentina	Shrimps and prawns, frozen, nei	Imports	Shrimps and prawns	Frozen	NA	Crustacean	Crustacean	1	5403	0	0	0	55	106	98	46	28	0	0	81	78	50	46	38	41	189	212	267	166	207	163	149	226	322	144	31	63	73	236	500	289	261	376	415	447	0	0	0	0
Argentina	Shrimps and prawns, other than coldwater, even smoked, frozen	Exports	Shrimps and prawns	Smoked	NA	Crustacean	Crustacean	2	2.18295e+06	0	0	0	0	0	0	0	0	0	0	0	0	0	0	0	0	0	0	0	0	0	0	0	0	0	0	0	0	0	0	0	0	0	0	0	0	156164	182096	214946	241574
Argentina	Shrimps and prawns, other than coldwater, even smoked, frozen	Imports	Shrimps and prawns	Smoked	NA	Crustacean	Crustacean	2	6385.3	0	0	0	0	0	0	0	0	0	0	0	0	0	0	0	0	0	0	0	0	0	0	0	0	0	0	0	0	0	0	0	0	0	0	0	0	528	326	270	456
Argentina	Shrimps and prawns, peeled, frozen	Exports	Shrimps and prawns	Frozen	Peeled	Crustacean	Crustacean	1.21	1052.7	0	0	0	0	0	0	0	0	0	0	0	0	382.36	585.64	84.7	0	0	0	0	0	0	0	0	0	0	0	0	0	0	0	0	0	0	0	0	0	0	0	0	0
Argentina	Shrimps and prawns, prep. or pres., in airtight containers	Imports	Shrimps and prawns	Prepared or preserved	NA	Crustacean	Crustacean	2.27	2721.34	0	0	0	0	0	0	0	0	0	0	0	0	0	0	0	0	0	0	0	0	0	0	0	0	0	0	0	0	0	0	0	0	0	0	0	0	789.96	767.26	690.08	363.2
Argentina	Shrimps and prawns, prep. or pres., not in airtight containers	Imports	Shrimps and prawns	Prepared or preserved	NA	Crustacean	Crustacean	2.27	4008.66	0	0	0	0	0	0	0	0	0	0	0	0	0	0	0	0	0	0	0	0	0	0	0	0	0	0	0	0	0	0	0	0	0	0	0	0	95.34	347.31	213.38	501.67
Argentina	Shrimps and prawns, tails, shell on, frozen	Exports	Shrimps and prawns	Frozen	Meat or tails	Crustacean	Crustacean	1.43	8662.94	0	0	0	0	0	0	0	0	0	0	0	52.91	2681.25	3642.21	2286.57	0	0	0	0	0	0	0	0	0	0	0	0	0	0	0	0	0	0	0	0	0	0	0	0	0
Argentina	Shrimps, prawns, prepared or preserved, nei	Exports	Shrimps and prawns	Prepared or preserved	NA	Crustacean	Crustacean	2.27	349.58	0	0	0	0	0	0	0	0	0	0	0	0	0	0	0	38.59	4.54	0	0	0	20.43	88.53	2.27	0	34.05	4.54	56.75	70.37	27.24	2.27	0	0	0	0	0	0	0	0	0	0
Argentina	Shrimps, prawns, prepared or preserved, nei	Imports	Shrimps and prawns	Prepared or preserved	NA	Crustacean	Crustacean	2.27	15031.9	0	0	0	0	674.19	435.84	79.45	13.62	0	0	0	0	0	18.16	99.88	140.74	122.58	199.76	803.58	767.26	746.83	1184.94	1232.61	1759.25	1529.98	871.68	27.24	18.16	61.29	140.74	279.21	469.89	662.84	401.79	1162.24	1128.19	0	0	0	0
Argentina	Cold-water shrimps and prawns (Pandalus spp., Crangon crangon), frozen, even smoked, whether in shell or not	Exports	Shrimps and prawns (Pandalus spp.)	Smoked	In shell or not	Crustacean	Crustacean	2.42	372.68	0	0	0	0	0	0	0	0	0	0	0	0	0	0	0	0	0	0	0	0	0	0	0	0	0	0	0	0	0	0	0	0	0	0	0	0	280.72	72.6	9.68	9.68
Argentina	Cold-water shrimps and prawns (Pandalus spp., Crangon crangon), frozen, even smoked, whether in shell or not	Imports	Shrimps and prawns (Pandalus spp.)	Smoked	In shell or not	Crustacean	Crustacean	2.42	759.88	0	0	0	0	0	0	0	0	0	0	0	0	0	0	0	0	0	0	0	0	0	0	0	0	0	0	0	0	0	0	0	0	0	0	0	0	171.82	244.42	106.48	84.7
Argentina	Cusk-eel (=kingklip), frozen	Exports	Cusk-eel (=kingklip)	Frozen	NA	Cusk-eel	Fish	1	18626	0	0	0	0	0	0	0	0	0	0	0	0	0	0	0	0	0	0	0	0	0	0	0	0	0	0	0	0	1698	5659	5512	5757	0	0	0	0	0	0	0	0
Argentina	Demersal fish meat, whether or not minced, frozen, nei	Exports	Demersal fish	Frozen	Meat	Demersal fish	Fish	1.25	172.5	0	0	0	0	0	0	0	0	0	0	0	0	0	0	0	0	0	0	0	0	0	0	0	0	0	0	0	0	0	0	0	0	1.25	78.75	47.5	45	0	0	0	0
Argentina	Miscellaneous demersal fish, fillets, frozen, nei	Exports	Demersal fish	Frozen	Fillets	Demersal fish	Fish	1.25	11486.2	0	0	0	0	0	0	0	0	0	0	0	0	0	0	0	0	0	0	0	0	0	0	0	0	0	0	0	0	0	0	0	3428.75	511.25	2548.75	2675	2322.5	0	0	0	0
Argentina	Miscellaneous demersal fish, nei, frozen	Exports	Demersal fish	Frozen	NA	Demersal fish	Fish	1	20188	0	0	0	0	0	0	0	0	0	0	0	0	0	0	0	0	0	0	0	0	0	0	0	0	0	0	20	30	312	1587	2725	3390	4102	3336	1820	755	239	135	436	403
Argentina	Dogfish (Squalidae), frozen	Exports	Dogfish (Squalidae)	Frozen	NA	Dogfish (Squalidae)	Fish	1	176	0	0	0	0	0	0	0	0	0	0	0	0	0	0	0	0	0	0	0	0	0	0	0	0	0	0	0	0	0	0	0	0	169	0	7	0	0	0	0	0
Argentina	Dogfish and other sharks nei (excl. Squalus acanthias, Scyliorhinus spp., Lamna nasus, Prionace glauca), frozen	Exports	Dogfish and other sharks	Frozen	NA	Dogfish and other sharks	Fish	1	12656	0	0	0	0	0	0	0	0	0	0	0	0	0	0	0	968	718	1124	1378	940	1208	572	172	95	194	277	166	489	567	646	666	402	339	309	344	336	245	90	118	105
Argentina	Dogfish, other sharks, rays and skates (Rajidae), fillets, frozen	Exports	Dogfish and other sharks	Frozen	Fillets	Dogfish and other sharks	Fish	1.25	401.425	0	0	0	0	0	0	0	0	0	0	0	0	0	0	0	0	0	0	0	0	0	0	0	0	0	0	0	0	0	0	0	0	0	0	0	0	0	0	0	0
Argentina	Eels, frozen	Exports	Eels	Frozen	NA	Eels	Fish	1	111	0	0	0	0	0	0	0	0	0	0	0	0	0	0	0	22	2	85	0	0	0	1	0	1	0	0	0	0	0	0	0	0	0	0	0	0	0	0	0	0
Argentina	Fish dried, whether or not salted, nei	Exports	Fish	Dried	NA	Fish	Fish	2.82	5814.84	0	0	0	0	0	0	0	0	0	0	0	0	0	0	0	1683.54	0	0	0	84.6	8.46	19.74	126.9	33.84	16.92	39.48	341.22	459.66	431.46	391.98	470.94	360.96	90.24	47.94	39.48	59.22	253.8	152.28	279.18	126.9
Argentina	Fish dried, whether or not salted, nei	Imports	Fish	Dried	NA	Fish	Fish	2.82	4142.58	0	0	0	0	5.64	2.82	2.82	0	2.82	2.82	0	0	0	0	0	0	118.44	36.66	2.82	0	16.92	0	0	586.56	575.28	521.7	33.84	53.58	56.4	50.76	67.68	62.04	121.26	87.42	157.92	284.82	234.06	270.72	304.56	163.56
Argentina	Fish fillets, dried, salted or in brine, nei	Exports	Fish	Dried	Fillets	Fish	Fish	2.82	5933.28	0	0	0	0	0	0	0	0	0	0	0	0	0	0	0	2306.76	0	0	47.94	0	0	0	0	0	0	0	0	107.16	310.2	738.84	572.46	530.16	504.78	225.6	253.8	301.74	0	0	0	0
Argentina	Fish fillets, fresh or chilled, nei	Exports	Fish	Live, fresh or chilled	Fillets	Fish	Fish	1.25	26910.8	0	0	0	0	0	0	0	0	0	0	236.25	355	1701.25	1235	1402.5	1270	1088.75	1505	1065	1188.75	2741.25	2151.25	2592.5	3301.25	1307.5	705	946.25	596.25	398.75	345	276.25	91.25	176.25	48.75	42.5	3.75	20	63.75	32.5	8.75
Argentina	Fish fillets, fresh or chilled, nei	Imports	Fish	Live, fresh or chilled	Fillets	Fish	Fish	1.25	1247.5	0	0	0	0	0	0	0	0	0	0	0	0	0	0	0	0	1.25	16.25	56.25	31.25	26.25	31.25	66.25	30	218.75	275	18.75	6.25	0	0	5	25	93.75	48.75	7.5	290	0	0	0	0
Argentina	Fish fillets, frozen, nei	Exports	Fish	Frozen	Fillets	Fish	Fish	1.25	1.18678e+06	20902.5	7685	10098.8	8568.75	10293.8	24125	17353.8	8677.5	3033.75	13667.5	6366.25	8308.75	4545	4745	9066.25	156840	109299	137414	158968	29196.2	29273.8	31065	39745	40856.2	42848.8	22708.8	20346.2	22623.8	26840	26706.2	26458.8	12802.5	13172.5	6320	6536.25	5638.75	11721.2	9006.25	8568.75	7587.5
Argentina	Fish fillets, frozen, nei	Imports	Fish	Frozen	Fillets	Fish	Fish	1.25	8378.34	0	0	0	5	0	0	0	0	0	40	0	12.5	8.75	0	0	40	92.5	131.25	840	128.75	98.75	205	412.5	332.5	690	496.25	133.75	250	398.75	506.25	418.75	440	608.75	877.5	656.25	473.75	0	23.75	0	27.5
Argentina	Fish heads, tails, maws, tongues, nei frozen	Exports	Fish	Frozen	Heads, tails, maws	Fish	Fish	5	79100.7	0	0	0	0	0	0	0	0	0	0	0	0	0	0	0	0	0	0	0	0	0	0	0	0	0	0	0	0	0	0	0	0	23435	90	35	40	0	0	0	0
Argentina	Fish meat, whether or not minced nei, fresh or chilled	Exports	Fish	Live, fresh or chilled	Meat	Fish	Fish	1.25	486.25	0	0	0	0	0	0	0	0	0	0	0	0	0	0	0	0	0	0	0	0	0	0	0	0	0	0	83.75	157.5	127.5	115	1.25	1.25	0	0	0	0	0	0	0	0
Argentina	Fish meat, whether or not minced, frozen, nei	Exports	Fish	Frozen	Meat	Fish	Fish	1.25	105080	0	0	0	0	0	0	0	0	0	0	0	0	0	0	0	0	9246.25	9423.75	6606.25	7347.5	9473.75	7428.75	10115	18745	2065	3190	5638.75	3751.25	1131.25	1792.5	1970	0	1512.5	1968.75	1827.5	1846.25	0	0	0	0
Argentina	Fish meat, whether or not minced, frozen, nei	Imports	Fish	Frozen	Meat	Fish	Fish	1.25	2173.25	0	0	0	0	0	0	0	0	0	0	0	0	0	0	0	0	3.75	28.75	5	2.5	48.75	100	55	141.25	205	197.5	67.5	91.25	86.25	120	226.25	250	5	5	28.75	65	50	45	23.75	46.25
Argentina	Fish minced (=surimi), frozen	Exports	Fish	Frozen	Minced	Fish	Fish	1.25	244450	0	0	0	0	0	0	0	0	0	0	2808.75	5657.5	8478.75	6645	8152.5	0	0	0	0	0	0	0	0	10481.2	32272.5	22498.8	21733.8	19081.2	25626.2	18133.8	19366.2	12342.5	0	14998.8	9560	6612.5	0	0	0	0
Argentina	Fish minced nei, prepared or preserved	Exports	Fish	Prepared or preserved	Minced	Fish	Fish	2.66	515111	0	0	0	0	0	0	0	0	0	0	0	0	0	0	0	2.66	31803	75363.1	60914	69833	68556.2	56958.6	73080.8	19434	2080.12	579.88	1784.86	1782.2	2558.92	1633.24	2181.2	3402.14	4689.58	5192.32	6748.42	5402.46	5173.7	3069.64	2763.74	2886.1
Argentina	Fish nei, dried, unsalted	Exports	Fish	Dried	NA	Fish	Fish	2.82	634.5	0	0	0	0	0	0	0	0	0	0	62.04	62.04	62.04	124.08	324.3	0	0	0	0	0	0	0	0	0	0	0	0	0	0	0	0	0	0	0	0	0	0	0	0	0
Argentina	Fish nei, prepared or preserved, not minced	Exports	Fish	Prepared or preserved	NA	Fish	Fish	2.66	821.94	0	0	0	0	0	0	0	0	0	0	0	0	0	0	0	0	0	0	0	0	0	0	0	0	0	0	0	0	0	0	0	0	816.62	0	5.32	0	0	0	0	0
Argentina	Fish nei, prepared or preserved, not minced	Imports	Fish	Prepared or preserved	NA	Fish	Fish	2.66	145259	0	0	0	0	0	0	0	0	0	0	0	0	0	0	0	0	0	0	0	779.38	665	1082.62	7812.42	9296.7	12672.2	13257.4	295.26	3583.02	8724.8	12813.2	13624.5	12209.4	6038.2	6189.82	3439.38	7809.76	4998.14	3434.06	1665.16	3630.9
Argentina	Fish nei, salted or in brine	Exports	Fish	Salted	NA	Fish	Fish	2.82	64180.4	4379.46	3728.04	3175.32	4060.8	2811.54	4382.28	6308.34	8849.16	10284.5	8008.8	558.36	451.2	1522.8	2535.18	1635.6	375.06	174.84	265.08	50.76	42.3	28.2	0	50.76	0	42.3	0	0	0	132.54	118.44	146.64	62.04	0	0	0	0	0	0	0	0
Argentina	Fish, dried, salted or smoked	Exports	Fish	Dried	NA	Fish	Fish	2.82	5222.64	284.82	1094.16	389.16	28.2	2605.68	211.5	476.58	132.54	0	0	0	0	0	0	0	0	0	0	0	0	0	0	0	0	0	0	0	0	0	0	0	0	0	0	0	0	0	0	0	0
Argentina	Fish, fresh or chilled, nei	Exports	Fish	Live, fresh or chilled	NA	Fish	Fish	1	92920	0	0	0	0	0	0	0	0	0	0	0	0	0	0	0	0	3663	5008	5904	6351	5825	7256	9973	12050	9125	3658	2914	3369	4677	5836	2594	1947	1926	229	389	207	15	4	0	0
Argentina	Fish, fresh, chilled or frozen	Exports	Fish	Live, fresh or chilled	NA	Fish	Fish	1	327666	4618	37184	47721	48833	46320	26830	87073	29087	0	0	0	0	0	0	0	0	0	0	0	0	0	0	0	0	0	0	0	0	0	0	0	0	0	0	0	0	0	0	0	0
Argentina	Fish, fresh, chilled or frozen	Imports	Fish	Live, fresh or chilled	NA	Fish	Fish	1	16876	124	6834	6459	3459	0	0	0	0	0	0	0	0	0	0	0	0	0	0	0	0	0	0	0	0	0	0	0	0	0	0	0	0	0	0	0	0	0	0	0	0
Argentina	Fish, frozen, nei	Exports	Fish	Frozen	NA	Fish	Fish	1	134041	0	0	0	0	0	0	0	0	0	0	0	0	0	0	0	0	24028	34992	72862	80	0	0	0	0	0	0	0	0	0	0	0	0	907	587	528	55	0	0	2	0
Argentina	Fish, frozen, nei	Imports	Fish	Frozen	NA	Fish	Fish	1	105794	0	0	0	5363	7690	7007	10190	8181	11908	4932	4359	13456	9765	4668	3535	11462	2969	203	28	0	0	0	0	0	0	0	0	0	0	0	0	0	0	0	0	0	1	7	0	0
Argentina	Flatfish nei, frozen	Exports	Flatfish	Frozen	NA	Flatfish	Fish	1	1042	0	0	0	0	0	0	0	0	0	0	0	0	0	0	0	152	7	8	60	486	4	23	33	1	0	0	5	1	12	30	57	79	0	0	0	62	14	0	8	0
Argentina	Flatfish, fresh or chilled, nei	Exports	Flatfish	Live, fresh or chilled	NA	Flatfish	Fish	1	2377	0	0	0	0	0	0	0	0	0	0	0	0	0	0	0	2278	0	0	0	2	0	0	35	10	0	2	18	17	3	2	0	0	0	3	7	0	0	0	0	0
Argentina	Freshwater fish nei, frozen	Exports	Freshwater fish	Frozen	NA	Freshwater fish	Fish	1	311368	0	0	0	0	0	0	0	0	0	0	0	0	0	0	0	0	0	0	0	0	0	0	0	0	0	0	0	1379	33774	31048	26237	16908	12353	14836	14354	16972	13234	14189	15782	18271
Argentina	Freshwater fish nei, frozen	Imports	Freshwater fish	Frozen	NA	Freshwater fish	Fish	1	235.18	0	0	0	0	0	0	0	0	0	0	0	0	0	0	0	0	0	0	0	0	0	0	0	0	0	0	0	0	100	0	0	0	0	22	0	24	24	0	0	0
Argentina	Grenadiers fillets, frozen	Exports	Grenadiers	Frozen	Fillets	Grenadiers	Fish	1.25	209524	0	0	0	0	0	0	0	0	0	0	0	0	0	0	0	0	0	0	0	0	0	0	0	0	23.75	13938.8	12270	16971.2	16653.8	21612.5	23128.8	18812.5	2527.5	15126.2	10497.5	11792.5	8812.5	8097.5	8371.25	6032.5
Argentina	Grenadiers, frozen	Exports	Grenadiers	Frozen	NA	Grenadiers	Fish	1	164432	0	0	0	0	0	0	0	0	0	0	0	0	0	0	0	0	0	0	0	0	0	0	0	0	0	12984	8674	14257	15720	16565	12313	9071	14152	13197	9559	9070	6338	3691	5090	6656
Argentina	Hake nei fillets, frozen	Exports	Hake	Frozen	Fillets	Hake	Fish	1.25	1070830	0	0	0	0	0	0	0	0	0	0	0	0	0	0	0	0	0	0	0	180460	192291	152172	136226	102866	60000	68751.2	126728	51232.5	0	0	66.25	33.75	2.5	0	0	0	0	0	0	0
Argentina	Hake nei fillets, frozen	Imports	Hake	Frozen	Fillets	Hake	Fish	1.25	6037.71	0	0	0	0	0	0	0	0	0	0	0	0	0	0	0	0	0	0	0	225	906.25	271.25	491.25	310	268.75	161.25	85	26.25	73.75	192.5	20	112.5	252.5	76.25	207.5	408.75	241.25	63.75	251.25	101.25
Argentina	Hake nei, fresh or chilled	Exports	Hake	Live, fresh or chilled	NA	Hake	Fish	1	11656	0	0	0	0	0	0	0	0	0	0	0	0	0	0	0	0	0	0	0	1720	4857	4376	367	2	0	1	48	284	0	0	0	0	1	0	0	0	0	0	0	0
Argentina	Hake, not minced, prepared or preserved	Exports	Hake	Prepared or preserved	NA	Hake	Fish	2.66	4269.3	0	0	0	0	0	0	0	0	0	0	872.48	736.82	5.32	37.24	0	0	0	0	0	0	0	0	0	0	0	0	0	0	0	0	0	0	117.04	593.18	537.32	1369.9	0	0	0	0
Argentina	Hakes nei, frozen	Exports	Hake	Frozen	NA	Hake	Fish	1	3284	0	0	0	0	0	0	0	0	0	0	0	0	0	0	0	0	0	0	0	0	0	0	774	964	693	388	70	66	92	66	37	33	63	13	25	0	0	0	0	0
Argentina	Hakes nei, frozen	Imports	Hake	Frozen	NA	Hake	Fish	1	1433	0	0	0	0	0	0	0	0	0	0	0	0	0	0	0	0	649	0	0	47	0	0	9	17	9	24	0	0	25	16	75	27	19	0	16	125	110	48	27	27
Argentina	Hakes, dried, unsalted	Exports	Hake	Dried	NA	Hake	Fish	2.82	318.66	0	0	0	0	0	0	0	0	0	0	318.66	0	0	0	0	0	0	0	0	0	0	0	0	0	0	0	0	0	0	0	0	0	0	0	0	0	0	0	0	0
Argentina	Hakes, salted or in brine	Exports	Hake	Salted	NA	Hake	Fish	2.82	12893	0	0	0	0	0	0	0	0	0	0	7388.4	4032.6	245.34	634.5	592.2	0	0	0	0	0	0	0	0	0	0	0	0	0	0	0	0	0	0	0	0	0	0	0	0	0
Argentina	Hake meat, frozen	Exports	Hake	Frozen	Meat	Hake	Fish	1.25	73785	0	0	0	0	0	0	0	0	0	0	0	0	0	0	0	0	0	0	0	0	0	0	0	0	0	0	0	2860	6028.75	5212.5	6837.5	5371.25	18000	10627.5	8235	6375	1857.5	1175	997.5	166.25
Argentina	Herrings minced, prepared or preserved	Imports	Herring	Prepared or preserved	Minced	Herring	Fish	2.66	359.1	0	0	0	0	0	0	0	0	0	0	0	0	0	0	0	0	74.48	87.78	196.84	0	0	0	0	0	0	0	0	0	0	0	0	0	0	0	0	0	0	0	0	0
Argentina	Herrings prepared or preserved, not minced, nei	Imports	Herring	Prepared or preserved	NA	Herring	Fish	2.66	1772.54	0	0	0	109.06	7.98	37.24	26.6	0	0	0	0	2.66	0	0	0	5.32	29.26	0	0	0	29.26	45.22	159.6	258.02	263.34	156.94	0	15.96	103.74	31.92	87.78	151.62	114.38	31.92	0	31.92	37.24	31.92	0	0
Argentina	Herrings, dried, whether or not salted	Imports	Herring	Dried	NA	Herring	Fish	2.82	434.28	0	36.66	70.5	98.7	28.2	64.86	42.3	0	0	0	39.48	50.76	0	0	0	2.82	0	0	0	0	0	0	0	0	0	0	0	0	0	0	0	0	0	0	0	0	0	0	0	0
Argentina	Mackerel prepared or preserved, not minced, nei	Exports	Mackerel	Prepared or preserved	NA	Mackerel	Fish	2.66	907.06	0	0	0	0	0	0	0	0	0	0	0	0	0	0	0	0	0	0	0	2.66	58.52	5.32	170.24	77.14	61.18	146.3	0	0	0	0	0	0	42.56	34.58	74.48	90.44	0	61.18	2.66	34.58
Argentina	Mackerel prepared or preserved, not minced, nei	Imports	Mackerel	Prepared or preserved	NA	Mackerel	Fish	2.66	90587.9	0	0	0	0	0	0	0	0	0	0	0	0	0	0	0	0	5.32	0	39.9	651.7	867.16	5059.32	3857	7200.62	6314.84	6115.34	335.16	3133.48	7017.08	9397.78	6958.56	6785.66	5389.16	4208.12	1093.26	332.5	300.58	138.32	486.78	1787.52
Argentina	Mackerel, minced, prepared or preserved	Imports	Mackerel	Prepared or preserved	Minced	Mackerel	Fish	2.66	595.84	0	0	0	0	0	0	0	0	0	0	0	0	0	0	0	0	42.56	39.9	513.38	0	0	0	0	0	0	0	0	0	0	0	0	0	0	0	0	0	0	0	0	0
Argentina	Mackerels nei, frozen	Exports	Mackerel	Frozen	NA	Mackerel	Fish	1	53682	0	0	0	0	0	0	0	0	0	0	0	0	0	0	0	0	0	562	2298	3597	3246	1489	660	1596	3432	911	2817	1823	1150	1049	385	288	4154	1254	7667	6171	4900	2908	596	11
Argentina	Mackerels nei, frozen	Imports	Mackerel	Frozen	NA	Mackerel	Fish	1	15804	0	0	0	0	0	0	0	0	0	0	0	0	0	0	0	0	2966	2171	1750	2210	1429	1888	196	46	649	253	0	0	545	0	410	378	108	0	0	0	0	0	0	587
Argentina	Marine fish fillets in blocks, nei, frozen	Exports	Marine fish	Frozen	Fillets	Marine fish	Fish	1.25	523395	0	0	0	0	0	0	0	0	0	0	79737.5	110504	95875	106329	130950	0	0	0	0	0	0	0	0	0	0	0	0	0	0	0	0	0	0	0	0	0	0	0	0	0
Argentina	Marine fish nei, minced, prepared or preserved	Exports	Marine fish	Prepared or preserved	Minced	Marine fish	Fish	2.66	36657.5	0	0	0	0	0	0	0	0	0	0	0	0	5969.04	5450.34	819.28	24418.8	0	0	0	0	0	0	0	0	0	0	0	0	0	0	0	0	0	0	0	0	0	0	0	0
Argentina	Marine fish nei, minced, prepared or preserved	Imports	Marine fish	Prepared or preserved	Minced	Marine fish	Fish	2.66	51271.5	0	0	0	0	0	0	0	0	0	0	0	0	0	0	0	0	13882.5	14050.1	23338.8	0	0	0	0	0	0	0	0	0	0	0	0	0	0	0	0	0	0	0	0	0
Argentina	Marine fish nei, prepared or preserved, not minced	Exports	Marine fish	Prepared or preserved	NA	Marine fish	Fish	2.66	23653.4	15.96	196.84	659.68	529.34	933.66	361.76	252.7	69.16	0	0	2.66	2.66	119.7	39.9	188.86	0	0	55.86	66.5	119.7	462.84	329.84	0	2.66	162.26	148.96	151.62	26.6	170.24	1042.72	989.52	949.62	0	0	0	0	492.1	1973.72	2394	2566.9
Argentina	Marine fish nei, prepared or preserved, not minced	Imports	Marine fish	Prepared or preserved	NA	Marine fish	Fish	2.66	12528.6	0	53.2	595.84	4162.9	3372.88	2803.64	359.1	202.16	0	0	0	0	133	0	0	7.98	146.3	196.84	494.76	0	0	0	0	0	0	0	0	0	0	0	0	0	0	0	0	0	0	0	0	0
Argentina	Marine fish nei, smoked	Exports	Marine fish	Smoked	NA	Marine fish	Fish	2.5	4060	0	0	0	0	0	0	0	0	0	0	0	0	0	0	0	97.5	2072.5	0	5	35	195	0	0	285	200	82.5	322.5	105	275	212.5	72.5	100	0	0	0	0	0	0	0	0
Argentina	Marine fish nei, smoked	Imports	Marine fish	Smoked	NA	Marine fish	Fish	2.5	450	0	0	0	20	57.5	17.5	12.5	22.5	0	0	0	10	17.5	25	17.5	90	10	20	40	15	5	5	15	10	27.5	10	0	0	0	0	0	0	0	0	0	2.5	0	0	0	0
Argentina	Marine fish, fresh or chilled, nei	Exports	Marine fish	Live, fresh or chilled	NA	Marine fish	Fish	1	55521	0	0	0	0	0	0	0	0	0	0	10246	6841	5634	13848	10995	7957	0	0	0	0	0	0	0	0	0	0	0	0	0	0	0	0	0	0	0	0	0	0	0	0
Argentina	Marine fish, fresh or chilled, nei	Imports	Marine fish	Live, fresh or chilled	NA	Marine fish	Fish	1	115	0	0	0	6	32	7	3	4	0	0	0	3	3	0	2	5	0	0	0	0	0	8	12	1	8	1	20	0	0	0	0	0	0	0	0	0	0	0	0	0
Argentina	Marine fish, frozen, nei	Exports	Marine fish	Frozen	NA	Marine fish	Fish	1	1.08397e+06	0	13444	14220	17482	26732	39892	0	0	20927	33513	52860	49371	38100	28644	24931	23167	0	0	0	47551	46238	36888	46540	48685	65210	42866	41185	54207	32345	25085	29744	19751	23907	26074	21454	15976	14890	11451	9771	8985
Argentina	Marine fish, frozen, nei	Imports	Marine fish	Frozen	NA	Marine fish	Fish	1	8538	0	0	0	0	0	0	0	0	0	367	12	200	0	3680	0	0	0	0	0	43	2	785	61	41	2713	106	44	58	45	25	75	117	48	29	37	50	0	0	0	0
Argentina	Pacific salmons, frozen, nei	Imports	Pacific salmons	Frozen	NA	Pacific salmons	Fish	1	955	0	0	0	0	0	0	0	0	0	0	0	0	0	0	0	0	13	20	156	71	35	12	25	0	0	0	14	11	8	0	103	31	23	0	119	68	69	77	0	44
Argentina	Miscellaneous pelagic fish, nei, frozen	Exports	Pelagic fish	Frozen	NA	Pelagic fish	Fish	1	2027	0	0	0	0	0	0	0	0	0	0	0	0	0	0	0	0	0	0	0	0	0	0	0	0	0	0	0	7	6	265	846	62	0	241	0	444	154	0	0	0
Argentina	Pilchards (Sardinops spp.), prep. or pres., not minced, nei	Imports	Pilchards (Sardinops spp.)	Prepared or preserved	NA	Pilchards (Sardinops spp.)	Fish	2.66	72236.6	0	0	0	582.54	3096.24	3793.16	308.56	0	0	0	5.32	175.56	29.26	34.58	0	1489.6	337.82	324.52	787.36	1425.76	2561.58	4436.88	4503.38	5149.76	3575.04	3465.98	364.42	462.84	1388.52	1295.42	2010.96	2162.58	1883.28	2295.58	2965.9	3085.6	2050.86	1697.08	1635.9	2322.18
Argentina	Rays, chimaeras meat, frozen	Exports	Rays, chimaeras	Frozen	Meat	Rays and chimaeras	Fish	1.25	303.75	0	0	0	0	0	0	0	0	0	0	0	0	0	0	0	0	0	0	0	0	0	0	0	0	0	0	0	0	0	0	0	303.75	0	0	0	0	0	0	0	0
Argentina	Rays and skates (Rajidae), fresh or chilled	Exports	Rays and skates (Rajidae)	Live, fresh or chilled	NA	Rays and skates (Rajidae)	Fish	1	168	0	0	0	0	0	0	0	0	0	0	0	0	0	0	0	0	0	0	0	0	0	0	0	0	0	0	0	0	0	0	0	0	0	0	0	0	65	76	21	6
Argentina	Rays and skates (Rajidae), frozen	Exports	Rays and skates (Rajidae)	Frozen	NA	Rays and skates (Rajidae)	Fish	1	106077	0	0	0	0	0	0	0	0	0	0	0	0	0	0	0	0	0	0	0	0	0	0	0	0	0	0	0	0	0	0	0	10715	8690	7225	8252	9024	9874	10	12048	14959
Argentina	Saithe (=Pollock), frozen	Exports	Saithe (=Pollock)	Frozen	NA	Saithe (=Pollock)	Fish	1	10008	0	0	0	0	0	0	0	0	0	0	0	0	0	0	0	0	0	0	0	0	0	1	0	0	0	0	0	0	0	0	0	0	148	3779	3080	3000	0	0	0	0
Argentina	Salmon fillets, fresh or chilled	Imports	Salmon	Live, fresh or chilled	Fillets	Salmon	Fish	1.25	12162	0	0	0	0	0	0	0	0	0	0	0	0	0	0	0	0	0	0	0	0	0	0	0	0	0	0	0	0	0	0	0	0	0	0	0	0	941.25	1277.5	1740	2632.5
Argentina	Salmon fillets, frozen	Imports	Salmon	Frozen	Fillets	Salmon	Fish	1.25	3116.25	0	0	0	0	0	0	0	0	0	0	0	0	0	0	0	0	0	0	0	0	0	0	0	0	0	0	0	0	0	0	0	0	0	0	0	0	386.25	680	472.5	578.75
Argentina	Salmon minced, prepared or preserved	Imports	Salmon	Prepared or preserved	Minced	Salmon	Fish	2.66	289.94	0	0	0	0	0	0	0	0	0	0	0	0	0	0	0	0	109.06	95.76	85.12	0	0	0	0	0	0	0	0	0	0	0	0	0	0	0	0	0	0	0	0	0
Argentina	Salmon nei, not minced, prepared or preserved	Imports	Salmon	Prepared or preserved	NA	Salmon	Fish	2.66	1252.86	0	0	0	2.66	2.66	0	0	0	0	0	0	0	0	0	0	0	0	15.96	13.3	58.52	71.82	45.22	281.96	135.66	125.02	74.48	10.64	0	0	0	0	0	50.54	61.18	50.54	37.24	50.54	55.86	26.6	34.58
Argentina	Salmons, fresh or chilled, nei	Exports	Salmon	Live, fresh or chilled	NA	Salmon	Fish	1	841	0	0	0	0	0	0	0	0	0	0	0	0	0	0	0	144	0	0	0	37	84	60	13	13	1	4	3	14	3	95	202	101	62	0	5	0	0	0	0	0
Argentina	Salmons, fresh or chilled, nei	Imports	Salmon	Live, fresh or chilled	NA	Salmon	Fish	1	27150	0	0	0	0	129	0	0	0	0	0	0	0	0	0	0	0	0	26	70	183	480	749	910	911	1230	1622	545	931	1368	1893	2096	2240	2719	2450	2880	3718	0	0	0	0
Argentina	Salmons, smoked	Exports	Salmon	Smoked	NA	Salmon	Fish	2.5	872.5	0	0	0	0	0	0	0	0	0	0	0	0	0	0	0	0	0	0	0	0	0	0	0	0	0	0	0	0	0	0	0	0	0	0	0	0	97.5	327.5	212.5	32.5
Argentina	Salmons, smoked	Imports	Salmon	Smoked	NA	Salmon	Fish	2.5	4112.82	0	0	0	0	0	0	0	0	0	0	0	0	0	0	0	0	22.5	87.5	180	172.5	140	227.5	227.5	270	175	180	37.5	65	52.5	75	95	125	97.5	105	100	100	95	90	57.5	165
Argentina	Salmonoids, fresh or chilled, nei	Exports	Salmonids	Live, fresh or chilled	NA	Salmonids	Fish	1	27608	0	0	0	0	0	0	0	0	0	0	0	0	0	0	0	1869	1890	3832	4269	4556	5415	3342	1124	1018	11	11	20	58	24	79	12	54	23	0	1	0	0	0	0	0
Argentina	Salmonoids, frozen	Exports	Salmonids	Frozen	NA	Salmonids	Fish	1	3229	0	0	0	0	0	0	0	0	0	0	0	0	0	0	0	561	197	267	306	6	466	1006	35	87	61	64	62	31	7	35	23	15	0	0	0	0	0	0	0	0
Argentina	Sardines, sardinellas, brisling or sprats, fresh or chilled	Imports	Sardine, sardinella, sprat	Live, fresh or chilled	NA	Sardine and sardinella and sprat	Fish	1	285	0	0	0	0	0	0	0	0	0	0	0	0	0	0	0	0	60	0	0	72	153	0	0	0	0	0	0	0	0	0	0	0	0	0	0	0	0	0	0	0
Argentina	Sardines, sardinellas, brisling or sprats, frozen	Exports	Sardine, sardinella, sprat	Frozen	NA	Sardine and sardinella and sprat	Fish	1	217	0	0	0	0	0	0	0	0	0	0	0	0	0	0	0	0	150	0	0	0	0	0	54	0	0	0	0	0	12	0	0	0	0	1	0	0	0	0	0	0
Argentina	Sardines, sardinellas, brisling or sprats, frozen	Imports	Sardine, sardinella, sprat	Frozen	NA	Sardine and sardinella and sprat	Fish	1	14707.8	0	0	0	0	0	0	0	0	0	1961	1070	2271	1208	227	0	0	968	1252	493	472	754	442	731	370	627	624	116	98	56	67	23	159	168	38	96	63	19	49	58	37
Argentina	Sardines, sardinellas, brisling or sprats, prep. or pres., not minced, nei	Imports	Sardine, sardinella, sprat	Prepared or preserved	NA	Sardine and sardinella and sprat	Fish	2.66	1604.94	0	0	0	0	0	0	0	0	0	0	0	0	0	0	0	0	0	0	0	0	0	0	0	0	0	53.2	0	0	0	0	0	98.42	0	79.8	162.26	82.46	82.46	199.5	0	0
Argentina	Sardines, sardinellas, sprats minced, prepared or preserved	Exports	Sardine, sardinella, sprat	Prepared or preserved	Minced	Sardine and sardinella and sprat	Fish	2.66	2404.64	0	0	0	0	0	0	0	0	0	0	0	0	0	0	0	0	638.4	619.78	617.12	109.06	162.26	220.78	5.32	0	0	0	0	0	0	0	0	0	29.26	2.66	0	0	0	0	0	0
Argentina	Sardines, sardinellas, sprats minced, prepared or preserved	Imports	Sardine, sardinella, sprat	Prepared or preserved	Minced	Sardine and sardinella and sprat	Fish	2.66	34967.7	0	0	0	0	0	0	0	0	0	0	0	0	0	0	0	0	0	0	0	6096.72	5447.68	4460.82	2667.98	1250.2	2221.1	1627.92	133	180.88	289.94	321.86	252.7	611.8	1018.78	399	880.46	1032.08	1218.28	1029.42	1351.28	657.02
Argentina	Seabass, fresh or chilled	Exports	Seabass	Live, fresh or chilled	NA	Seabass	Fish	1	506	0	0	0	0	0	0	0	0	0	0	0	0	0	0	0	0	0	0	0	0	0	0	0	0	0	0	8	60	95	112	63	32	24	28	43	19	9	8	0	0
Argentina	Seabass, frozen	Exports	Seabass	Frozen	NA	Seabass	Fish	1	11472	0	0	0	0	0	0	0	0	0	0	0	0	0	0	0	1	2	0	3	8	19	6	92	497	44	0	512	836	422	394	205	508	799	878	1146	940	819	944	721	567
Argentina	Seabreams nei, fresh or chilled	Exports	Seabreams	Live, fresh or chilled	NA	Seabream	Fish	1	435	0	0	0	0	0	0	0	0	0	0	0	0	0	0	0	0	0	0	0	0	0	0	0	0	0	0	0	0	0	0	0	0	0	0	0	0	44	198	72	13
Argentina	Seabreams, frozen	Exports	Seabreams	Frozen	NA	Seabream	Fish	1	1861	0	0	0	0	0	0	0	0	0	0	0	0	0	0	0	0	0	0	0	0	0	0	0	0	0	0	785	712	220	8	36	26	42	5	27	0	0	0	0	0
Argentina	Shads, nei, fresh or chilled	Exports	Shad	Live, fresh or chilled	NA	Shad	Fish	1	26034	0	0	0	0	0	0	10738	9544	1910	0	0	0	0	0	0	0	0	0	0	0	0	0	0	0	0	0	0	30	140	392	3113	167	0	0	0	0	0	0	0	0
Argentina	Shark fillets nei, frozen	Exports	Shark	Frozen	Fillets	Shark	Fish	1.25	7258.75	0	0	0	0	0	0	0	0	0	0	0	0	0	0	0	0	0	0	0	0	0	0	0	0	0	0	0	0	0	0	0	0	4747.5	936.25	926.25	648.75	0	0	0	0
Argentina	Sharks nei, fresh or chilled	Exports	Shark	Live, fresh or chilled	NA	Shark	Fish	1	407	0	0	0	0	0	0	0	0	0	0	0	0	0	0	0	0	0	0	0	32	12	10	20	47	50	26	53	39	51	37	17	2	8	1	2	0	0	0	0	0
Argentina	Sharks, dried, whether or not salted, but not smoked	Exports	Shark	Dried	NA	Shark	Fish	2.82	893.94	0	0	0	0	0	0	0	0	0	0	0	0	0	0	0	0	0	0	0	0	0	0	31.02	104.34	183.3	375.06	16.92	8.46	2.82	67.68	2.82	0	31.02	14.1	31.02	25.38	0	0	0	0
Argentina	Sharks, rays, chimeras, dried, whether or not salted, nei	Exports	Shark, ray, chimaera	Dried	NA	Shark and ray and chimaera	Fish	2.82	1627.14	0	0	0	0	0	0	0	0	0	0	0	0	0	0	0	0	0	0	0	0	0	0	0	0	0	0	327.12	135.36	115.62	73.32	149.46	174.84	236.88	163.56	149.46	101.52	0	0	0	0
Argentina	Sharks,rays,chimaeras, skates, fillets, frozen, nei	Exports	Shark, ray, chimaera, skate	Frozen	Fillets	Shark and ray and chimaera and skate	Fish	1.25	828.75	0	0	0	0	0	0	0	0	0	0	0	0	0	0	0	0	0	0	0	0	0	0	0	0	0	0	0	0	0	0	0	236.25	167.5	106.25	146.25	172.5	0	0	0	0
Argentina	Skipjack prepared or preserved, not minced, nei	Imports	Skipjack tuna	Prepared or preserved	NA	Skipjack tuna	Fish	2.66	23278.7	0	0	0	0	0	0	0	0	0	0	0	0	0	0	0	0	0	0	0	53.2	0	0	183.54	2739.8	2431.24	122.36	0	776.72	1146.46	1064	2253.02	2143.96	1553.44	1372.56	3202.64	3649.52	0	0	0	0
Argentina	Skipjack tuna, fresh or chilled	Imports	Skipjack tuna	Live, fresh or chilled	NA	Skipjack tuna	Fish	1	162	0	0	0	0	0	0	0	0	0	0	0	0	0	0	0	0	60	0	0	102	0	0	0	0	0	0	0	0	0	0	0	0	0	0	0	0	0	0	0	0
Argentina	Skipjack tuna, frozen	Imports	Skipjack tuna	Frozen	NA	Skipjack tuna	Fish	1	42149	0	0	0	0	0	0	0	0	0	0	0	0	0	2623	0	0	6030	3294	3533	2003	2210	2125	2039	1872	1761	1361	1060	1902	1074	1371	1326	1396	1055	730	515	662	711	490	466	49
Argentina	Southern blue whiting (Micromesistius australis), frozen	Exports	Southern blue whiting	Frozen	NA	Southern blue whiting	Fish	1	6117	0	0	0	0	0	0	0	0	0	0	0	0	0	0	0	0	0	0	0	0	0	0	0	0	0	0	0	0	782	916	885	923	1274	657	665	15	0	0	0	0
Argentina	Southern hake, frozen	Exports	Southern hake	Frozen	NA	Southern hake	Fish	1	30069	0	0	0	0	0	0	0	0	0	0	0	0	0	0	0	0	0	0	0	0	0	0	516	1324	4038	2538	2751	3697	3892	2223	2054	1638	1822	2035	1487	54	0	0	0	0
Argentina	Swordfish fillets, frozen	Exports	Swordfish	Frozen	Fillets	Swordfish	Fish	1.25	148.75	0	0	0	0	0	0	0	0	0	0	0	0	0	0	0	0	0	0	0	0	0	0	0	0	0	0	0	0	0	0	0	148.75	0	0	0	0	0	0	0	0
Argentina	Swordfish, fresh or chilled	Exports	Swordfish	Live, fresh or chilled	NA	Swordfish	Fish	1	567	0	0	0	0	0	0	0	0	0	0	0	0	0	0	0	567	0	0	0	0	0	0	0	0	0	0	0	0	0	0	0	0	0	0	0	0	0	0	0	0
Argentina	Swordfish, frozen	Imports	Swordfish	Frozen	NA	Swordfish	Fish	1	203	0	0	0	0	0	0	0	0	0	0	0	0	0	0	0	0	0	0	0	0	0	0	0	0	0	0	0	12	7	8	17	17	20	32	14	17	8	9	5	16
Argentina	Toothfish (Dissostichus spp.), fillets, frozen	Exports	Toothfish (Dissostichus spp.)	Frozen	Fillets	Toothfish (Dissostichus spp.)	Fish	1.25	1035	0	0	0	0	0	0	0	0	0	0	0	0	0	0	0	0	0	0	0	0	0	0	0	0	0	0	608.75	233.75	165	0	6.25	3.75	0	1.25	0	0	0	0	0	16.25
Argentina	Toothfish (Dissostichus spp.), frozen	Exports	Toothfish (Dissostichus spp.)	Frozen	NA	Toothfish (Dissostichus spp.)	Fish	1	35953.3	0	0	0	0	0	0	0	0	0	0	0	0	0	0	0	0	0	0	0	0	0	0	0	0	0	0	3147	3117	1841	782	747	1163	945	1957	1572	2055	2031	2255	2810	2555
Argentina	Toothfish (Dissostichus spp.), meat, frozen	Exports	Toothfish (Dissostichus spp.)	Frozen	Meat	Toothfish (Dissostichus spp.)	Fish	1.25	841.25	0	0	0	0	0	0	0	0	0	0	0	0	0	0	0	0	0	0	0	0	0	0	0	0	0	0	0	10	22.5	1.25	16.25	298.75	25	33.75	23.75	26.25	50	73.75	77.5	43.75
Argentina	Trout fillets, frozen	Exports	Trout	Frozen	Fillets	Trout	Fish	1.25	642.5	0	0	0	0	0	0	0	0	0	0	0	0	0	0	0	0	0	0	0	0	0	0	0	0	0	0	0	0	0	0	0	0	63.75	271.25	67.5	23.75	0	31.25	23.75	55
Argentina	Trout fillets, frozen	Imports	Trout	Frozen	Fillets	Trout	Fish	1.25	186.613	0	0	0	0	0	0	0	0	0	0	0	0	0	0	0	0	0	0	0	0	0	0	0	0	0	0	0	0	0	0	0	0	0	0	0	0	21.25	0	0	0
Argentina	Trouts and chars, fresh or chilled	Exports	Trouts and chars	Live, fresh or chilled	NA	Trout and char	Fish	1	629	0	0	0	0	0	0	0	0	0	0	0	0	0	0	0	474	0	0	0	0	19	44	2	3	9	7	7	8	7	5	0	0	0	0	39	0	0	0	0	0
Argentina	Trouts and chars, fresh or chilled	Imports	Trouts and chars	Live, fresh or chilled	NA	Trout and char	Fish	1	858	0	0	0	0	0	0	0	0	0	0	0	0	0	0	0	0	4	0	0	0	6	3	1	0	2	0	0	8	0	0	40	122	16	124	384	148	0	0	0	0
Argentina	Trouts and chars, frozen	Exports	Trouts and chars	Frozen	NA	Trout and char	Fish	1	419	0	0	0	0	0	0	0	0	0	0	0	0	0	0	0	0	0	1	81	132	2	0	11	0	0	0	0	25	23	0	0	0	86	37	18	0	0	0	0	1
Argentina	Trouts and chars, frozen	Imports	Trouts and chars	Frozen	NA	Trout and char	Fish	1	1225.26	0	0	0	0	0	0	0	0	0	0	0	0	0	0	0	0	10	13	29	23	29	48	67	12	27	34	10	29	14	12	61	92	73	36	138	218	19	41	18	0
Argentina	Tunas nei, frozen	Exports	Tuna	Frozen	NA	Tuna	Fish	1	165	0	0	0	0	0	0	0	0	0	0	0	0	0	0	0	9	126	11	6	8	1	0	4	0	0	0	0	0	0	0	0	0	0	0	0	0	0	0	0	0
Argentina	Tunas nei, frozen	Imports	Tuna	Frozen	NA	Tuna	Fish	1	19123	0	0	0	0	0	0	0	0	0	1563	5669	7288	3334	98	0	0	205	710	76	21	44	47	19	9	13	17	0	0	0	0	3	0	0	1	0	2	4	0	0	0
Argentina	Tunas nei, minced, prepared or preserved	Exports	Tuna	Prepared or preserved	Minced	Tuna	Fish	2.66	271.32	0	0	0	0	0	0	0	0	0	0	0	0	0	0	0	0	0	2.66	13.3	53.2	2.66	10.64	53.2	0	0	0	0	0	0	0	0	0	34.58	63.84	21.28	15.96	0	0	0	0
Argentina	Tunas nei, minced, prepared or preserved	Imports	Tuna	Prepared or preserved	Minced	Tuna	Fish	2.66	18316.9	0	0	0	0	0	0	0	0	0	0	0	0	0	0	0	0	0	0	0	0	0	0	0	0	0	0	122.36	518.7	2165.24	1686.44	2723.84	2330.16	1558.76	1497.58	2715.86	2021.6	53.2	53.2	31.92	0
Argentina	Tunas prepared or preserved, not minced, nei	Exports	Tuna	Prepared or preserved	NA	Tuna	Fish	2.66	534.66	0	0	0	0	0	0	0	0	0	0	0	0	0	0	0	29.26	0	0	2.66	2.66	53.2	18.62	0	5.32	0	0	0	0	7.98	2.66	2.66	0	0	0	0	0	167.58	0	242.06	0
Argentina	Tunas prepared or preserved, not minced, nei	Imports	Tuna	Prepared or preserved	NA	Tuna	Fish	2.66	667871	0	0	0	694.26	1420.44	2370.06	561.26	0	0	0	2.66	42.56	47.88	95.76	875.14	3407.46	2064.16	6642.02	9528.12	11150.7	12693.5	20205.4	21899.8	25823.3	25192.9	27427.3	6876.1	9751.56	14111.3	15502.5	17646.4	24602.3	18665.2	21641.8	26091.9	33446.8	37410.2	34694.4	29108.4	40642.1
Argentina	Tunas, bonitos, billfishes, nei, minced, prepared or preserved	Exports	Tunas, bonitos, billfishes	Prepared or preserved	Minced	Tuna and bonito and billfish	Fish	2.66	614.46	0	0	0	0	0	0	0	0	0	0	0	0	0	0	0	369.74	5.32	0	42.56	2.66	0	0	5.32	2.66	0	0	0	2.66	178.22	0	5.32	0	0	0	0	0	0	0	0	0
Argentina	Tunas, bonitos, billfishes, nei, minced, prepared or preserved	Imports	Tunas, bonitos, billfishes	Prepared or preserved	Minced	Tuna and bonito and billfish	Fish	2.66	639360	0	0	0	0	0	0	0	0	0	0	0	0	0	0	0	0	2037.56	3484.6	5609.94	23314.9	20232	20083	14749.7	16061.1	20000.5	23251.1	4075.12	13044.6	21399.7	25038.6	22679.2	33031.9	26884.6	22354.6	37096.4	34673.1	34447	30068.6	24530.5	33026.6
Argentina	Weakfish, frozen	Exports	Weakfish	Frozen	NA	Weakfish	Fish	1	164986	0	0	0	0	0	0	0	0	0	0	0	0	0	0	0	0	0	0	0	3741	7201	7577	6729	3248	2007	4834	949	1136	3154	2086	2800	3114	6209	7614	8331	10802	12685	13867	12105	12382
Argentina	Yellowfin tuna, frozen, nei	Exports	Yellowfin tuna	Frozen	NA	Yellowfin tuna	Fish	1	109	0	0	0	0	0	0	0	0	0	0	0	0	0	0	0	16	57	0	33	0	0	2	0	0	0	0	0	0	0	1	0	0	0	0	0	0	0	0	0	0
Argentina	Yellowfin tuna, frozen, nei	Imports	Yellowfin tuna	Frozen	NA	Yellowfin tuna	Fish	1	1186.02	0	0	0	0	0	0	0	0	0	0	0	0	0	0	0	0	60	100	16	0	27	38	150	99	8	49	62	143	47	10	24	14	75	31	10	14	31	40	27	30
Armenia	Alaska pollock, frozen	Imports	Alaska pollock	Frozen	NA	Alaska pollock	Fish	1	207.09	0	0	0	0	0	0	0	0	0	0	0	0	0	0	0	0	0	0	0	0	0	0	0	17	0	0	0	0	1	0	0	0	95	0	0	0	0	0	0	0
Armenia	Albacore (=Longfin tuna), frozen, nei	Imports	Albacore	Frozen	NA	Albacore	Fish	1	1142	0	0	0	0	0	0	0	0	0	0	0	0	0	0	0	0	0	0	0	0	0	0	0	0	0	0	0	0	0	0	0	0	0	480	365	25	37	194	41	0
Armenia	Anchovies, Indian mackerels, seerfishes, jacks, crevalles, silver pomfrets, Pacific saury, scads, capelin, Kawakawa, bonitos, marlins, sailfishes, spearfish, frozen	Imports	Anchovies, Indian mackerels, seerfishes, jacks, crevalles, silver pomfrets, Pacific saury, scads, capelin, Kawakawa, bonitos, marlins, sailfishes, spearfish	Frozen	NA	Anchovies and Indian mackerels and seerfishes	Fish	1	125.47	0	0	0	0	0	0	0	0	0	0	0	0	0	0	0	0	0	0	0	0	0	0	0	0	0	0	0	0	0	0	0	0	0	0	0	0	0	0	0	0
Armenia	Atlantic mackerel prepared or preserved, not minced	Imports	Atlantic mackerel	Prepared or preserved	NA	Atlantic mackerel	Fish	2.66	931.346	0	0	0	0	0	0	0	0	0	0	0	0	0	0	0	0	0	0	0	0	0	0	0	0	0	0	2.66	0	2.66	13.3	29.26	26.6	106.4	77.14	34.58	90.44	79.8	55.86	103.74	55.86
Armenia	Atlantic salmon and Danube salmon, frozen	Imports	Atlantic salmon and Danube salmon	Frozen	NA	Atlantic salmon and Danube salmon	Fish	1	210.36	0	0	0	0	0	0	0	0	0	0	0	0	0	0	0	0	0	0	0	0	0	0	0	0	0	0	0	0	0	0	0	0	7	3	5	0	0	0	8	21
Armenia	Catfish, frozen	Imports	Catfish	Frozen	NA	Catfish	Fish	1	939	0	0	0	0	0	0	0	0	0	0	0	0	0	0	0	0	0	0	0	0	0	0	0	0	0	0	0	0	0	0	0	0	0	0	0	0	0	346	426	96
Armenia	Gadiformes nei, frozen	Imports	Cod and hake and haddock	Frozen	NA	Cod and hake and haddock	Fish	1	214.41	0	0	0	0	0	0	0	0	0	0	0	0	0	0	0	0	0	0	0	0	0	0	0	0	0	0	0	0	0	0	0	0	0	0	0	0	0	65	25	1
Armenia	Crustaceans nei, even smoked, frozen	Exports	Crustaceans	Smoked	NA	Crustacean	Crustacean	2	1034	0	0	0	0	0	0	0	0	0	0	0	0	0	0	0	0	0	0	0	0	0	0	0	0	0	0	6	2	20	0	0	0	142	0	4	2	4	38	64	296
Armenia	Crustaceans nei, prepared or preserved	Exports	Crustaceans	Prepared or preserved	NA	Crustacean	Crustacean	2.27	4633.84	0	0	0	0	0	0	0	0	0	0	0	0	0	0	0	0	0	0	0	0	0	0	0	0	0	0	0	0	0	99.88	77.18	0	492.59	376.82	238.35	506.21	796.77	719.59	363.2	227
Armenia	Miscellaneous crustaceans, not frozen, nei	Imports	Crustaceans	NA	NA	Crustacean	Crustacean	1	114	0	0	0	0	0	0	0	0	0	0	0	0	0	0	0	0	0	0	0	0	0	0	0	0	0	0	0	0	0	0	0	0	0	0	0	0	0	26	16	35
Armenia	Crayfish (freshwater), live, fresh or chilled	Exports	Freshwater crayfish	Live, fresh or chilled	NA	Crustacean	Crustacean	1	22167	0	0	0	0	0	0	0	0	0	0	0	0	0	0	0	0	0	0	0	0	0	0	52	0	20	5	388	760	794	672	934	797	618	473	791	1122	1734	4265	4254	2676
Armenia	Shrimps and prawns, frozen, nei	Exports	Shrimps and prawns	Frozen	NA	Crustacean	Crustacean	1	300	0	0	0	0	0	0	0	0	0	0	0	0	0	0	0	0	0	0	0	0	0	0	0	300	0	0	0	0	0	0	0	0	0	0	0	0	0	0	0	0
Armenia	Shrimps and prawns, other than coldwater, even smoked, frozen	Imports	Shrimps and prawns	Smoked	NA	Crustacean	Crustacean	2	224.02	0	0	0	0	0	0	0	0	0	0	0	0	0	0	0	0	0	0	0	0	0	0	0	0	0	0	0	0	0	0	0	0	0	0	0	0	0	22	6	16
Armenia	Euthynnus excl. skipjack or stripe-bellied bonitos, frozen	Imports	Euthynnus other than skipjack	Frozen	NA	Euthynnus other than skipjack	Fish	1	208	0	0	0	0	0	0	0	0	0	0	0	0	0	0	0	0	0	0	0	0	0	0	0	0	0	0	0	0	0	0	0	3	54	127	24	0	0	0	0	0
Armenia	Fish dried, whether or not salted, nei	Imports	Fish	Dried	NA	Fish	Fish	2.82	707.341	0	0	0	0	0	0	0	0	0	0	0	0	0	0	0	0	0	0	0	0	0	0	0	0	0	0	0	0	0	0	59.22	28.2	59.22	47.94	45.12	22.56	0	11.28	0	14.1
Armenia	Fish fillets, dried, salted or in brine, nei	Imports	Fish	Dried	Fillets	Fish	Fish	2.82	372.973	0	0	0	0	0	0	0	0	0	0	0	0	0	0	0	0	0	0	0	197.4	36.66	5.64	0	62.04	0	0	0	0	0	0	0	0	0	0	0	5.64	5.64	0	2.82	2.82
Armenia	Fish live, nei	Exports	Fish	Live, fresh or chilled	NA	Fish	Fish	1	910.56	0	0	0	0	0	0	0	0	0	0	0	0	0	0	0	0	0	0	0	0	0	0	0	0	1	0	0	0	0	0	1	4	6	9	4	13	16	24	34	253
Armenia	Fish meat,whether or not minced, fresh,chilled,frozen, nei	Imports	Fish	Live, fresh or chilled	Meat	Fish	Fish	1.25	213.75	0	0	0	0	0	0	0	0	0	0	0	0	0	0	0	0	0	0	0	166.25	47.5	0	0	0	0	0	0	0	0	0	0	0	0	0	0	0	0	0	0	0
Armenia	Fish minced nei, prepared or preserved	Exports	Fish	Prepared or preserved	Minced	Fish	Fish	2.66	3160.61	0	0	0	0	0	0	0	0	0	0	0	0	0	0	0	0	0	0	0	0	0	0	0	0	0	39.9	0	7.98	0	21.28	2.66	26.6	18.62	5.32	0	0	0	31.92	79.8	194.18
Armenia	Fish minced nei, prepared or preserved	Imports	Fish	Prepared or preserved	Minced	Fish	Fish	2.66	3705.67	0	0	0	0	0	0	0	0	0	0	0	0	0	0	0	0	0	0	0	0	0	138.32	0	90.44	579.88	138.32	85.12	2.66	393.68	263.34	13.3	45.22	164.92	82.46	45.22	138.32	21.28	31.92	34.58	406.98
Armenia	Fish nei, prepared or preserved, not minced	Imports	Fish	Prepared or preserved	NA	Fish	Fish	2.66	3430.12	0	0	0	0	0	0	0	0	0	0	0	0	0	0	0	0	0	0	763.42	518.7	2.66	13.3	1064	133	0	122.36	0	7.98	0	13.3	13.3	23.94	212.8	47.88	42.56	50.54	39.9	39.9	15.96	45.22
Armenia	Fish nei, salted or in brine	Imports	Fish	Salted	NA	Fish	Fish	2.82	671.273	0	0	0	0	0	0	0	0	0	0	0	0	0	0	0	0	0	0	0	0	0	0	0	0	84.6	0	0	0	0	203.04	95.88	45.12	129.72	25.38	59.22	25.38	0	0	0	2.82
Armenia	Fish, fresh or chilled, nei	Exports	Fish	Live, fresh or chilled	NA	Fish	Fish	1	5062.05	0	0	0	0	0	0	0	0	0	0	0	0	0	0	0	0	0	0	0	0	0	0	0	0	0	0	0	0	0	0	0	0	0	0	0	0	0	1356	794	833
Armenia	Fish, frozen, nei	Exports	Fish	Frozen	NA	Fish	Fish	1	181.87	0	0	0	0	0	0	0	0	0	0	0	0	0	0	0	0	0	0	0	0	0	0	0	0	0	68	36	0	0	0	0	0	0	0	0	0	0	27	0	7
Armenia	Fish, frozen, nei	Imports	Fish	Frozen	NA	Fish	Fish	1	1439.44	0	0	0	0	0	0	0	0	0	0	0	0	0	0	0	0	0	0	0	0	0	0	0	0	0	18	0	0	0	0	0	0	0	0	0	0	0	455	238	332
Armenia	Flatfish nei, frozen	Imports	Flatfish	Frozen	NA	Flatfish	Fish	1	292	0	0	0	0	0	0	0	0	0	0	0	0	0	0	0	0	0	0	0	0	0	0	0	0	0	0	0	3	0	28	0	0	0	76	52	102	0	0	1	2
Armenia	Freshwater fish fillets, nei, frozen	Imports	Freshwater fish	Frozen	Fillets	Freshwater fish	Fish	1.25	157.5	0	0	0	0	0	0	0	0	0	0	0	0	0	0	0	0	0	0	0	0	0	0	0	0	0	0	0	0	0	0	0	0	0	0	0	62.5	95	0	0	0
Armenia	Freshwater fish nei, frozen	Exports	Freshwater fish	Frozen	NA	Freshwater fish	Fish	1	930	0	0	0	0	0	0	0	0	0	0	0	0	0	0	0	0	0	0	0	0	0	0	0	0	0	0	2	0	0	20	0	1	1	0	201	557	148	0	0	0
Armenia	Freshwater fish nei, frozen	Imports	Freshwater fish	Frozen	NA	Freshwater fish	Fish	1	101	0	0	0	0	0	0	0	0	0	0	0	0	0	0	0	0	0	0	0	0	0	0	0	0	0	0	0	5	0	0	6	1	2	27	27	20	13	0	0	0
Armenia	Freshwater fish, nei, fresh or chilled	Exports	Freshwater fish	Live, fresh or chilled	NA	Freshwater fish	Fish	1	1547.32	0	0	0	0	0	0	0	0	0	0	0	0	0	0	0	0	0	0	0	0	0	0	0	0	0	0	0	0	0	0	1	1	4	1	15	355	990	3	0	2
Armenia	Grenadiers, frozen	Imports	Grenadiers	Frozen	NA	Grenadiers	Fish	1	257	0	0	0	0	0	0	0	0	0	0	0	0	0	0	0	0	0	0	0	0	0	0	0	0	0	0	0	0	0	0	257	0	0	0	0	0	0	0	0	0
Armenia	Hakes nei, frozen	Imports	Hake	Frozen	NA	Hake	Fish	1	2360.28	0	0	0	0	0	0	0	0	0	0	0	0	0	0	0	0	0	0	0	0	0	1	0	0	0	0	0	0	0	28	0	65	0	27	0	0	25	27	330	400
Armenia	Herring, salted or in brine	Imports	Herring	Salted	NA	Herring	Fish	2.82	665.774	0	0	0	0	0	0	0	0	0	0	0	0	0	0	0	0	0	0	0	0	0	2.82	0	25.38	0	0	0	45.12	45.12	0	59.22	0	45.12	81.78	53.58	205.86	50.76	2.82	0	0
Armenia	Herrings nei, frozen	Imports	Herring	Frozen	NA	Herring	Fish	1	932.64	0	0	0	0	0	0	0	0	0	0	0	0	0	0	0	0	0	0	0	0	0	6	0	11	10	0	0	0	1	0	15	0	62	51	58	177	53	103	107	82
Armenia	Herrings prepared or preserved, not minced, nei	Imports	Herring	Prepared or preserved	NA	Herring	Fish	2.66	4594.86	0	0	0	0	0	0	0	0	0	0	0	0	0	0	0	0	0	0	0	938.98	492.1	138.32	0	26.6	0	0	2.66	0	2.66	95.76	292.6	324.52	508.06	327.18	218.12	258.02	151.62	175.56	135.66	66.5
Armenia	Herrings, not minced, prep. or pres., not in airtight containers	Imports	Herring	Prepared or preserved	NA	Herring	Fish	2.66	512.901	0	0	0	0	0	0	0	0	0	0	0	0	0	0	0	0	0	0	0	0	0	0	0	0	2.66	0	37.24	0	87.78	23.94	154.28	13.3	5.32	0	0	5.32	0	2.66	0	103.74
Armenia	Jack and horse mackerel, frozen	Imports	Jack and horse mackerel	Frozen	NA	Jack and horse mackerel	Fish	1	211.4	0	0	0	0	0	0	0	0	0	0	0	0	0	0	0	0	0	0	0	0	0	0	0	0	0	0	0	0	0	10	0	3	32	132	8	20	0	0	0	0
Armenia	Mackerels nei, frozen	Imports	Mackerel	Frozen	NA	Mackerel	Fish	1	4847.88	0	0	0	0	0	0	0	0	0	0	0	0	0	0	0	0	0	0	0	0	0	0	0	0	4	0	0	0	2	0	57	132	268	249	301	443	597	599	559	403
Armenia	Marine fish, frozen, nei	Imports	Marine fish	Frozen	NA	Marine fish	Fish	1	9216	0	0	0	0	0	0	0	0	0	0	0	0	0	0	0	0	0	0	0	0	0	0	0	0	0	0	0	52	147	5475	259	226	865	817	70	303	1002	0	0	0
Armenia	Pacific salmons, frozen, nei	Imports	Pacific salmons	Frozen	NA	Pacific salmons	Fish	1	102.17	0	0	0	0	0	0	0	0	0	0	0	0	0	0	0	0	0	0	0	0	0	10	0	18	1	0	0	0	0	0	0	10	0	0	3	4	1	26	1	13
Armenia	Salmon fillets, frozen	Imports	Salmon	Frozen	Fillets	Salmon	Fish	1.25	168.35	0	0	0	0	0	0	0	0	0	0	0	0	0	0	0	0	0	0	0	0	0	0	0	0	0	0	0	0	0	0	0	0	0	0	0	0	0	2.5	10	6.25
Armenia	Salmonoids, frozen	Imports	Salmonids	Frozen	NA	Salmonids	Fish	1	247.68	0	0	0	0	0	0	0	0	0	0	0	0	0	0	0	0	0	0	0	0	0	0	0	0	0	0	0	0	0	0	0	0	30	12	21	8	5	120	5	0
Armenia	Sardines, sardinellas, brisling or sprats, frozen	Imports	Sardine, sardinella, sprat	Frozen	NA	Sardine and sardinella and sprat	Fish	1	4111	0	0	0	0	0	0	0	0	0	0	0	0	0	0	0	0	0	0	0	0	0	0	0	0	0	0	0	0	0	0	56	51	314	708	831	1004	902	206	0	35
Armenia	Sardines, sardinellas, brisling or sprats, prep. or pres., not minced, nei	Imports	Sardine, sardinella, sprat	Prepared or preserved	NA	Sardine and sardinella and sprat	Fish	2.66	35321.4	0	0	0	0	0	0	0	0	0	0	0	0	0	0	0	0	0	0	0	0	0	236.74	0	657.02	1383.2	1431.08	2593.5	1723.68	997.5	2130.66	1851.36	2274.3	2077.46	1569.4	672.98	2582.86	1399.16	1409.8	1641.22	1643.88
Armenia	Trouts and chars, fresh or chilled	Exports	Trouts and chars	Live, fresh or chilled	NA	Trout and char	Fish	1	14503.3	0	0	0	0	0	0	0	0	0	0	0	0	0	0	0	0	0	0	0	0	0	0	0	1	1	3	2	6	22	46	64	40	46	0	200	371	672	832	860	418
Armenia	Trouts and chars, frozen	Exports	Trouts and chars	Frozen	NA	Trout and char	Fish	1	265.38	0	0	0	0	0	0	0	0	0	0	0	0	0	0	0	0	0	0	0	0	0	0	0	10	0	3	12	0	0	0	3	12	17	4	1	9	3	3	0	31
Armenia	Tunas nei, frozen	Imports	Tuna	Frozen	NA	Tuna	Fish	1	132	0	0	0	0	0	0	0	0	0	0	0	0	0	0	0	0	0	0	0	0	0	0	0	0	0	0	0	0	0	0	25	0	24	74	9	0	0	0	0	0
Armenia	Tunas prepared or preserved, not minced, nei	Imports	Tuna	Prepared or preserved	NA	Tuna	Fish	2.66	907.938	0	0	0	0	0	0	0	0	0	0	0	0	0	0	0	0	0	0	0	0	0	0	0	18.62	0	0	13.3	0	0	45.22	0	10.64	69.16	13.3	385.7	55.86	7.98	18.62	61.18	42.56
Armenia	Tunas, bonitos, billfishes, nei, minced, prepared or preserved	Imports	Tunas, bonitos, billfishes	Prepared or preserved	Minced	Tuna and bonito and billfish	Fish	2.66	490.344	0	0	0	0	0	0	0	0	0	0	0	0	0	0	0	0	0	0	0	0	0	0	0	0	0	473.48	0	0	0	0	0	0	0	0	2.66	0	0	0	0	0
Armenia	Blue whiting (Micromesistius poutassou), frozen	Imports	Blue whiting (Micromesistius poutassou)	Frozen	NA	Blue whiting	Fish	1	516	0	0	0	0	0	0	0	0	0	0	0	0	0	0	0	0	0	0	0	0	0	0	0	0	0	230	211	75	0	0	0	0	0	0	0	0	0	0	0	0
Australia	Alaska pollock fillets, frozen	Imports	Alaska pollock	Frozen	Fillets	Alaska pollock	Fish	1.25	845.2	0	0	0	0	0	0	0	0	0	0	0	0	0	0	0	0	0	0	0	0	0	0	0	0	0	0	0	0	0	0	0	0	0	0	0	0	52.5	87.5	53.75	228.75
Australia	Alaska pollock, meat, whether or not minced, frozen	Imports	Alaska pollock	Frozen	Meat	Alaska pollock	Fish	1.25	7910.76	0	0	0	0	0	0	0	0	0	0	0	0	0	0	0	0	0	0	0	0	0	0	0	0	0	0	0	0	0	0	0	0	0	0	0	0	135	807.5	1203.75	1092.5
Australia	Albacore (=Longfin tuna), fresh or chilled	Exports	Albacore	Live, fresh or chilled	NA	Albacore	Fish	1	4517.48	0	0	0	0	0	0	0	0	0	0	0	0	0	4	0	1	94	4	60	55	192	4	0	0	14	37	200	74	71	251	643	982	267	409	188	60	33	29	70	232
Australia	Albacore (=Longfin tuna), frozen, nei	Exports	Albacore	Frozen	NA	Albacore	Fish	1	8656.86	0	0	0	0	0	0	0	0	0	0	0	0	0	151	7	18	65	55	132	12	0	164	84	86	144	191	155	186	484	243	274	688	671	708	438	488	403	217	314	353
Australia	Anchovies, Indian mackerels, seerfishes, jacks, crevalles, silver pomfrets, Pacific saury, scads, capelin, Kawakawa, bonitos, marlins, sailfishes, spearfish, frozen	Imports	Anchovies, Indian mackerels, seerfishes, jacks, crevalles, silver pomfrets, Pacific saury, scads, capelin, Kawakawa, bonitos, marlins, sailfishes, spearfish	Frozen	NA	Anchovies and Indian mackerels and seerfishes	Fish	1	987.74	0	0	0	0	0	0	0	0	0	0	0	0	0	0	0	0	0	0	0	0	0	0	0	0	0	0	0	0	0	0	0	0	0	0	0	0	0	0	0	0
Australia	Anchovies, prepared or preserved, not minced	Exports	Anchovy	Prepared or preserved	NA	Anchovy	Fish	2.66	1071.53	0	0	0	0	0	0	0	0	0	0	0	0	0	23.94	2.66	15.96	26.6	7.98	39.9	2.66	0	0	0	2.66	2.66	236.74	7.98	5.32	23.94	15.96	31.92	18.62	31.92	47.88	53.2	31.92	31.92	13.3	87.78	37.24
Australia	Anchovies, prepared or preserved, not minced	Imports	Anchovy	Prepared or preserved	NA	Anchovy	Fish	2.66	73212.7	478.8	795.34	587.86	619.78	779.38	726.18	986.86	468.16	574.56	1013.46	795.34	1037.4	702.24	1154.44	1090.6	1183.7	1133.16	1045.38	1396.5	1553.44	1699.74	1987.02	2638.72	1694.42	1984.36	1710.38	1965.74	2098.74	2213.12	2670.64	2955.26	2574.88	2226.42	2276.96	2463.16	2617.44	2580.2	2447.2	2404.64	2614.78
Australia	Anchovies, salted or in brine	Imports	Anchovy	Salted	NA	Anchovy	Fish	2.82	4404.42	0	0	0	0	0	0	0	0	0	0	0	0	76.14	304.56	346.86	352.5	211.5	214.32	239.7	242.52	203.04	0	0	0	290.46	217.14	191.76	152.28	36.66	53.58	19.74	42.3	36.66	78.96	36.66	56.4	183.3	157.92	112.8	118.44
Australia	Anchovies, semi-preserved	Imports	Anchovy	Prepared or preserved	NA	Anchovy	Fish	2.66	433.58	0	0	0	0	0	0	0	0	0	0	0	0	93.1	66.5	21.28	21.28	23.94	13.3	39.9	0	154.28	0	0	0	0	0	0	0	0	0	0	0	0	0	0	0	0	0	0	0
Australia	Atlantic(Thunnus thynnus), Pacific(T.orientalis) bluefin tuna, live	Exports	Atlantic (Thunnus thynnus)and Pacific (Thunnus orientalis) bluefin tuna	Live, fresh or chilled	NA	Atlantic and Pacific bluefin tuna	Fish	1	278.9	0	0	0	0	0	0	0	0	0	0	0	0	0	0	0	0	0	0	0	0	0	0	0	0	0	0	0	0	0	0	0	0	0	0	0	0	1	2	10	29
Australia	Atlantic(Thunnus thynnus)and Pacific(Thunnus orientalis)bluefin tuna, fresh or chilled	Exports	Atlantic (Thunnus thynnus)and Pacific (Thunnus orientalis) bluefin tuna	Live, fresh or chilled	NA	Atlantic and Pacific bluefin tuna	Fish	1	159.43	0	0	0	0	0	0	0	0	0	0	0	0	0	0	0	0	0	0	0	0	0	0	0	0	0	0	16	10	6	67	2	9	1	7	2	7	1	0	14	1
Australia	Atlantic(Thunnus thynnus)and Pacific(Thunnus orientalis)bluefin tuna, frozen	Exports	Atlantic (Thunnus thynnus)and Pacific (Thunnus orientalis) bluefin tuna	Frozen	NA	Atlantic and Pacific bluefin tuna	Fish	1	440	0	0	0	0	0	0	0	0	0	0	0	0	0	0	0	0	0	0	0	0	0	0	0	0	0	0	0	0	0	345	85	0	0	0	0	0	0	0	0	10
Australia	Atlantic and Danube salmons, fresh or chilled	Exports	Atlantic salmon and Danube salmon	Live, fresh or chilled	NA	Atlantic salmon and Danube salmon	Fish	1	48332.1	0	0	0	0	0	0	0	0	0	0	0	0	0	0	0	0	0	0	0	0	0	0	0	0	0	0	0	0	0	0	0	0	0	0	0	0	2432	1518	1375	8451
Australia	Atlantic and Danube salmons, fresh or chilled	Imports	Atlantic salmon and Danube salmon	Live, fresh or chilled	NA	Atlantic salmon and Danube salmon	Fish	1	251.06	0	0	0	0	0	0	0	0	0	0	0	0	0	0	0	0	0	0	0	0	0	0	0	0	0	0	0	0	0	0	0	0	0	0	0	0	0	42	148	33
Australia	Atlantic salmon and Danube salmon, frozen	Exports	Atlantic salmon and Danube salmon	Frozen	NA	Atlantic salmon and Danube salmon	Fish	1	4221.46	0	0	0	0	0	0	0	0	0	0	0	0	0	0	2	139	44	35	63	94	103	115	134	129	200	91	170	110	30	36	7	24	132	275	83	18	8	27	157	305
Australia	Atlantic salmon and Danube salmon, frozen	Imports	Atlantic salmon and Danube salmon	Frozen	NA	Atlantic salmon and Danube salmon	Fish	1	3086.44	0	0	0	0	0	0	0	0	0	0	0	0	0	39	0	1	0	0	9	14	10	25	36	5	4	0	10	53	129	17	16	26	14	10	95	174	280	487	912	681
Australia	Bigeye tuna, fresh or chilled	Exports	Bigeye tuna	Live, fresh or chilled	NA	Bigeye tuna	Fish	1	9696.19	0	0	0	0	0	0	0	0	0	0	0	0	0	0	0	0	0	0	0	0	0	0	0	0	0	0	1214	1024	646	486	303	650	725	534	423	367	467	383	396	663
Australia	Bigeye tuna, fresh or chilled	Imports	Bigeye tuna	Live, fresh or chilled	NA	Bigeye tuna	Fish	1	206.18	0	0	0	0	0	0	0	0	0	0	0	0	0	0	0	0	0	0	0	0	0	0	0	0	0	0	0	43	1	8	13	19	24	12	8	9	8	4	24	15
Australia	Bigeye tuna, frozen, nei	Exports	Bigeye tuna	Frozen	NA	Bigeye tuna	Fish	1	244.05	0	0	0	0	0	0	0	0	0	0	0	0	0	0	0	0	0	0	0	0	0	0	0	0	0	0	29	29	24	20	2	10	10	17	2	1	1	92	4	1
Australia	Blue whitings (Micromesistius poutassou, Micromesistius australis), frozen	Exports	Blue whitings	Frozen	NA	Blue whitings	Fish	1	828	0	0	0	0	0	0	0	0	0	0	0	0	0	0	0	0	0	0	0	0	0	0	0	0	0	0	0	0	0	0	0	0	0	0	0	0	468	183	47	0
Australia	Carps, fresh or chilled	Exports	Carps	Live, fresh or chilled	NA	Carps	Fish	1	163.58	0	0	0	0	0	0	0	0	0	0	0	0	0	0	0	0	0	0	0	0	0	0	0	0	0	0	0	0	0	0	0	0	0	0	0	0	0	0	0	0
Australia	Carps, frozen	Exports	Carps	Frozen	NA	Carps	Fish	1	639.85	0	0	0	0	0	0	0	0	0	0	0	0	0	0	0	0	0	0	0	0	0	0	0	0	0	0	0	0	0	0	0	0	0	0	0	0	0	0	0	0
Australia	Carps, frozen	Imports	Carps	Frozen	NA	Carps	Fish	1	433.12	0	0	0	0	0	0	0	0	0	0	0	0	0	0	0	0	0	0	0	0	0	0	0	0	0	0	0	0	0	0	0	0	0	0	0	0	74	19	41	129
Australia	Carps, eels and snakeheads, fillets, fresh or chilled	Imports	Carps, eels and snakeheads	Live, fresh or chilled	Fillets	Carps and eels and snakeheads	Fish	1.25	5638.31	0	0	0	0	0	0	0	0	0	0	0	0	0	0	0	0	0	0	0	0	0	0	0	0	0	0	0	0	0	0	0	0	0	0	0	0	993.75	957.5	655	683.75
Australia	Carps, eels and snakeheads, fillets, frozen	Imports	Carps, eels and snakeheads	Frozen	Fillets	Carps and eels and snakeheads	Fish	1.25	4108.11	0	0	0	0	0	0	0	0	0	0	0	0	0	0	0	0	0	0	0	0	0	0	0	0	0	0	0	0	0	0	0	0	0	0	0	0	98.75	487.5	1550	817.5
Australia	Catfish fillets, fresh or chilled	Imports	Catfish	Live, fresh or chilled	Fillets	Catfish	Fish	1.25	9884.16	0	0	0	0	0	0	0	0	0	0	0	0	0	0	0	0	0	0	0	0	0	0	0	0	0	0	0	0	0	0	0	0	0	0	0	0	2051.25	1651.25	570	685
Australia	Catfish fillets, frozen	Exports	Catfish	Frozen	Fillets	Catfish	Fish	1.25	423.438	0	0	0	0	0	0	0	0	0	0	0	0	0	0	0	0	0	0	0	0	0	0	0	0	0	0	0	0	0	0	0	0	0	0	0	0	142.5	8.75	1.25	20
Australia	Catfish fillets, frozen	Imports	Catfish	Frozen	Fillets	Catfish	Fish	1.25	60020.7	0	0	0	0	0	0	0	0	0	0	0	0	0	0	0	0	0	0	0	0	0	0	0	0	0	0	0	0	0	0	0	0	0	0	0	0	6156.25	6782.5	7685	6876.25
Australia	Catfish, fresh or chilled	Imports	Catfish	Live, fresh or chilled	NA	Catfish	Fish	1	145	0	0	0	0	0	0	0	0	0	0	0	0	0	0	0	0	0	0	0	0	0	0	0	0	0	0	0	0	0	0	0	0	0	0	0	0	0	20	2	12
Australia	Catfish, frozen	Imports	Catfish	Frozen	NA	Catfish	Fish	1	1061.08	0	0	0	0	0	0	0	0	0	0	0	0	0	0	0	0	0	0	0	0	0	0	0	0	0	0	0	0	0	0	0	0	0	0	0	0	77	35	66	67
Australia	Cuttlefish and squid, other than live, fresh or chilled	Exports	Cuttlefish and squid	Live, fresh or chilled	NA	Cephalopod	Cephalopod	1	8179	0	0	0	0	0	0	0	0	0	0	0	0	0	0	0	0	0	0	0	571	0	310	313	573	496	419	232	305	996	898	655	306	164	242	192	362	351	328	107	172
Australia	Cuttlefish and squid, other than live, fresh or chilled	Imports	Cuttlefish and squid	Live, fresh or chilled	NA	Cephalopod	Cephalopod	1	296931	0	0	0	0	1083	1662	1450	1883	2553	2114	2797	2861	3232	3254	3698	3198	4184	4210	5772	5712	6345	7968	8914	9054	7788	7507	8773	9026	10855	11830	12747	13130	14831	14315	14253	12910	13030	14835	15762	15060
Australia	Cuttlefish and squid, prepared or preserved	Exports	Cuttlefish and squid	Prepared or preserved	NA	Cephalopod	Cephalopod	2.66	489.44	0	0	0	0	0	0	0	0	0	0	0	0	0	0	0	0	0	0	0	0	0	0	0	0	0	0	0	0	0	0	0	0	0	0	0	0	93.1	42.56	98.42	111.72
Australia	Cuttlefish and squid, prepared or preserved	Imports	Cuttlefish and squid	Prepared or preserved	NA	Cephalopod	Cephalopod	2.66	100975	0	0	0	0	0	0	0	0	0	0	0	0	0	0	0	0	0	0	0	0	0	0	0	0	0	0	0	0	0	0	0	0	0	0	0	0	9802.1	12587.1	11986	12818.5
Australia	Cuttlefishes and squids, dried, salted or in brine, smoked nei	Imports	Cuttlefish and squid	Dried	NA	Cephalopod	Cephalopod	2.82	2261.05	0	0	0	0	0	0	0	0	0	0	0	0	0	0	0	0	0	0	0	0	0	0	0	0	0	0	0	0	0	0	0	0	0	0	0	0	0	0	0	0
Australia	Cuttlefishes and squids, frozen, nei	Exports	Cuttlefish and squid	Frozen	NA	Cephalopod	Cephalopod	1	1840.52	0	0	0	0	0	0	0	0	0	0	0	0	0	119	230	10	89	263	560	0	288	0	0	0	0	0	0	0	0	0	0	0	0	0	0	0	0	0	0	0
Australia	Cuttlefishes and squids, frozen, nei	Imports	Cuttlefish and squid	Frozen	NA	Cephalopod	Cephalopod	1	42067	0	0	0	0	0	0	0	0	0	0	0	0	0	0	0	0	0	0	0	0	0	0	0	0	0	0	0	0	0	0	0	0	0	0	0	0	0	0	0	0
Australia	Cuttlefishes and squids, live, fresh or chilled, nei	Exports	Cuttlefish and squid	Live, fresh or chilled	NA	Cephalopod	Cephalopod	1	808.86	0	0	0	0	0	0	0	0	0	0	0	0	0	1	0	0	0	2	0	1	273	54	1	35	37	41	6	17	17	3	90	36	87	86	0	0	0	10	0	1
Australia	Cuttlefishes and squids, live, fresh or chilled, nei	Imports	Cuttlefish and squid	Live, fresh or chilled	NA	Cephalopod	Cephalopod	1	867	0	0	0	0	0	0	0	0	0	0	0	0	39	25	232	21	17	14	14	0	1	0	0	0	69	3	0	0	11	0	0	0	1	0	0	21	37	156	55	97
Australia	Octopus, dried, salted or in brine, smoked	Imports	Octopus	Dried	NA	Cephalopod	Cephalopod	2.82	586.052	0	0	0	0	0	0	0	0	0	0	0	0	0	0	0	0	0	0	0	0	0	0	0	0	0	0	0	0	0	0	0	0	0	0	0	0	0	0	0	0
Australia	Octopus, frozen	Exports	Octopus	Frozen	NA	Cephalopod	Cephalopod	1	212.57	0	0	0	0	0	0	0	0	0	0	0	0	0	4	44	7	13	4	86	0	21	0	0	0	0	0	0	0	0	0	0	0	0	0	0	0	0	0	0	0
Australia	Octopus, frozen	Imports	Octopus	Frozen	NA	Cephalopod	Cephalopod	1	4824.65	0	0	0	0	0	0	0	0	0	0	0	0	0	0	0	0	0	0	0	0	0	0	0	0	0	0	0	0	0	0	0	0	0	0	0	0	0	0	0	0
Australia	Octopus, live, fresh or chilled	Imports	Octopus	Live, fresh or chilled	NA	Cephalopod	Cephalopod	1	613.99	0	0	0	0	0	0	0	0	0	0	0	0	5	50	15	12	55	5	37	24	0	0	0	0	54	70	0	9	15	1	4	1	11	58	24	14	4	35	35	22
Australia	Octopus, other than live, fresh or chilled	Exports	Octopus	Live, fresh or chilled	NA	Cephalopod	Cephalopod	1	1648	0	0	0	0	0	0	0	0	0	0	0	0	0	0	0	0	0	0	0	138	0	555	88	436	21	80	67	50	27	6	12	19	8	4	37	7	21	2	8	33
Australia	Octopus, other than live, fresh or chilled	Imports	Octopus	Live, fresh or chilled	NA	Cephalopod	Cephalopod	1	47082	0	0	0	0	0	0	0	0	0	0	0	0	108	308	395	645	731	930	1326	1791	2010	0	0	0	2979	2970	2888	3088	2399	2566	2490	2248	1884	2211	1702	1962	1805	1851	1892	2069
Australia	Octopus, prepared or preserved	Imports	Octopus	Prepared or preserved	NA	Cephalopod	Cephalopod	2.66	6433.05	0	0	0	0	0	0	0	0	0	0	0	0	0	0	0	0	0	0	0	0	0	0	0	0	0	0	0	0	0	0	0	0	0	0	0	0	561.26	571.9	641.06	720.86
Australia	Clupeoids, prep. or pres., not minced, not in airtight containers	Imports	Clupeoids	Prepared or preserved	NA	Clupeoids	Fish	2.66	899.08	0	0	0	0	0	0	0	0	0	0	0	0	58.52	87.78	95.76	29.26	327.18	109.06	93.1	0	98.42	0	0	0	0	0	0	0	0	0	0	0	0	0	0	0	0	0	0	0
Australia	Cod nei, fillets, frozen	Imports	Cod	Frozen	Fillets	Cod	Fish	1.25	1479.92	0	0	0	0	0	0	0	0	0	0	0	0	0	0	0	0	0	0	0	0	0	0	0	0	0	0	0	0	0	0	0	0	0	0	0	0	111.25	88.75	117.5	273.75
Australia	Cods nei, dried, whether or not salted	Imports	Cod	Dried	NA	Cod	Fish	2.82	11951.9	0	0	0	290.46	338.4	225.6	423	273.54	248.16	279.18	236.88	242.52	222.78	239.7	225.6	157.92	298.92	214.32	871.38	552.72	369.42	0	0	0	346.86	200.22	248.16	485.04	208.68	360.96	267.9	304.56	287.64	552.72	304.56	307.38	344.04	442.74	284.82	279.18
Australia	Cods nei, frozen	Exports	Cod	Frozen	NA	Cod	Fish	1	251.51	0	0	0	0	0	0	0	0	0	0	0	0	0	1	4	0	0	1	96	0	0	0	0	18	22	11	38	10	3	0	0	0	0	2	0	17	0	2	1	1
Australia	Cods nei, frozen	Imports	Cod	Frozen	NA	Cod	Fish	1	1649.42	0	0	0	0	0	0	0	0	0	0	0	0	1	26	12	38	58	33	380	50	73	0	0	0	67	18	5	20	29	35	8	11	36	33	24	67	107	106	132	55
Australia	Cods nei, salted or in brine	Imports	Cod	Salted	NA	Cod	Fish	2.82	1740.36	0	0	0	0	0	0	0	0	0	0	0	0	67.68	109.98	194.58	253.8	36.66	109.98	126.9	56.4	129.72	0	0	0	31.02	36.66	16.92	16.92	39.48	76.14	95.88	11.28	59.22	53.58	33.84	42.3	16.92	0	14.1	31.02
Australia	Cods, fresh or chilled, nei	Exports	Cod	Live, fresh or chilled	NA	Cod	Fish	1	110.29	0	0	0	0	0	0	0	0	0	0	0	0	0	2	0	0	0	3	0	0	0	14	0	0	7	33	20	18	2	0	0	1	1	1	0	0	0	1	0	1
Australia	Cods, fresh or chilled, nei	Imports	Cod	Live, fresh or chilled	NA	Cod	Fish	1	161	0	0	0	0	0	0	0	0	0	0	0	0	0	0	0	2	0	2	6	0	0	0	0	0	1	13	13	14	5	16	6	4	11	8	4	1	20	25	2	0
Australia	Gadiformes excl. Alaska pollock, meat, whether or not minced, frozen	Imports	Cod and hake and haddock	Frozen	Meat	Cod and hake and haddock	Fish	1.25	3830.35	0	0	0	0	0	0	0	0	0	0	0	0	0	0	0	0	0	0	0	0	0	0	0	0	0	0	0	0	0	0	0	0	0	0	0	0	17.5	2.5	13.75	37.5
Australia	Gadiformes fillets, frozen, nei	Exports	Cod and hake and haddock	Frozen	Fillets	Cod and hake and haddock	Fish	1.25	1182.62	0	0	0	0	0	0	0	0	0	0	0	0	0	0	0	0	0	0	0	0	0	0	0	0	0	0	0	0	0	0	0	0	0	0	0	0	322.5	782.5	33.75	31.25
Australia	Gadiformes fillets, frozen, nei	Imports	Cod and hake and haddock	Frozen	Fillets	Cod and hake and haddock	Fish	1.25	7211.5	0	0	0	0	0	0	0	0	0	0	0	0	0	0	0	0	0	0	0	0	0	0	0	0	0	0	0	0	0	0	0	0	0	0	0	0	957.5	273.75	237.5	242.5
Australia	Gadiformes nei, frozen	Exports	Cod and hake and haddock	Frozen	NA	Cod and hake and haddock	Fish	1	5746.44	0	0	0	0	0	0	0	0	0	0	0	0	0	0	0	0	0	0	0	0	0	0	0	0	0	0	0	0	0	0	0	0	0	0	0	0	693	775	349	741
Australia	Gadiformes nei, frozen	Imports	Cod and hake and haddock	Frozen	NA	Cod and hake and haddock	Fish	1	197.03	0	0	0	0	0	0	0	0	0	0	0	0	0	0	0	0	0	0	0	0	0	0	0	0	0	0	0	0	0	0	0	0	0	0	0	0	24	33	20	48
Australia	Gadiformes, fresh or chilled, nei	Exports	Cod and hake and haddock	Live, fresh or chilled	NA	Cod and hake and haddock	Fish	1	470.88	0	0	0	0	0	0	0	0	0	0	0	0	0	0	0	0	0	0	0	0	0	0	0	0	0	0	0	0	0	0	0	0	0	0	0	0	28	77	62	159
Australia	Gadiformes, meat, whether or not minced, frozen, nei	Exports	Cod and hake and haddock	Frozen	Meat	Cod and hake and haddock	Fish	1.25	1243.75	0	0	0	0	0	0	0	0	0	0	0	0	0	20	41.25	440	301.25	215	151.25	0	75	0	0	0	0	0	0	0	0	0	0	0	0	0	0	0	0	0	0	0
Australia	Common sole (Solea Solea), frozen	Imports	Common sole (Solea Solea)	Frozen	NA	Common sole	Fish	1	5305	0	0	0	0	0	0	0	0	0	0	0	0	229	228	434	298	309	298	199	248	256	0	0	0	278	215	161	247	299	103	25	51	75	83	47	35	246	241	170	175
Australia	American/European lobsters (Homarus spp.), nei, even smoked, frozen	Imports	American/European lobsters (Homarus spp.)	Smoked	NA	Crustacean	Crustacean	2	20019.1	0	0	0	0	0	0	0	0	0	0	0	0	104	214	178	350	266	198	652	526	364	902	872	772	912	328	530	432	456	526	614	668	780	604	570	692	730	1090	1022	752
Australia	American/European lobsters (Homarus spp.), not frozen	Exports	American/European lobsters (Homarus spp.)	NA	NA	Crustacean	Crustacean	1	4971	0	0	0	0	0	0	0	0	0	0	0	0	0	19	341	462	22	34	50	116	444	58	35	34	182	435	674	490	104	43	20	0	0	1	1	149	306	217	192	151
Australia	American/European lobsters (Homarus spp.), not frozen	Imports	American/European lobsters (Homarus spp.)	NA	NA	Crustacean	Crustacean	1	212	0	0	0	0	0	0	0	0	0	0	0	0	2	3	5	5	19	16	13	9	1	0	0	0	7	2	4	32	14	10	4	0	0	0	0	0	5	17	28	14
Australia	American/European lobsters (Homarus spp.), whole, even smoked, frozen	Exports	American/European lobsters (Homarus spp.)	Smoked	NA	Crustacean	Crustacean	2	8551.28	0	0	0	0	0	0	0	0	0	0	0	0	0	26	154	946	1460	1656	76	266	288	378	470	206	352	826	548	196	88	38	44	118	16	14	20	72	24	22	16	30
Australia	American/European lobsters (Homarus spp.), whole, fresh or chilled	Imports	American/European lobsters (Homarus spp.)	Live, fresh or chilled	NA	Crustacean	Crustacean	1	271	0	0	0	0	0	0	0	0	0	0	0	0	36	141	23	30	22	5	5	3	6	0	0	0	0	0	0	0	0	0	0	0	0	0	0	0	0	0	0	0
Australia	Crab meat nei, prepared or preserved	Exports	Crab	Prepared or preserved	Meat	Crustacean	Crustacean	5.9701	1320.41	0	0	0	0	0	0	0	0	0	0	0	0	0	5.9701	23.8804	65.6711	107.462	53.7309	11.9402	89.5515	0	0	11.9402	0	47.7608	23.8804	5.9701	35.8206	35.8206	29.8505	71.6412	23.8804	41.7907	137.312	59.701	95.5216	23.8804	5.9701	35.8206	77.6113
Australia	Crab meat nei, prepared or preserved	Imports	Crab	Prepared or preserved	Meat	Crustacean	Crustacean	5.9701	98797.5	1408.94	2059.68	1946.25	2095.51	2322.37	3796.98	3188.03	3247.73	2919.38	4399.96	3426.84	3020.87	3391.02	3444.75	2280.58	1528.35	2495.5	2071.62	2417.89	1599.99	1820.88	1444.76	1623.87	1522.38	2656.69	1826.85	1797	2316.4	1928.34	991.037	2202.97	1707.45	919.395	853.724	925.365	1337.3	2805.95	3110.42	2865.65	2155.21
Australia	Crab meat, in airtight containers, prep.or pres.	Imports	Crab	Prepared or preserved	Meat	Crustacean	Crustacean	5.9701	11814.8	0	0	0	0	0	0	0	0	0	0	0	0	0	0	0	0	0	0	0	0	0	0	0	0	0	0	0	0	0	1176.11	1367.15	1456.7	1862.67	2017.89	1653.72	2280.58	0	0	0	0
Australia	Crabs nei, frozen	Exports	Crab	Frozen	NA	Crustacean	Crustacean	1	17354	0	0	0	0	0	0	0	0	0	0	0	0	0	277	279	386	351	487	1504	1272	1115	1319	791	626	391	314	485	396	463	670	489	796	865	518	578	334	264	254	311	447
Australia	Crabs nei, frozen	Imports	Crab	Frozen	NA	Crustacean	Crustacean	1	17477.9	0	0	0	0	0	0	0	0	0	0	0	0	20	81	51	101	73	67	125	138	96	119	147	95	171	158	136	194	262	383	416	652	567	688	728	848	1134	1399	1412	1589
Australia	Crabs, not frozen	Exports	Crab	NA	NA	Crustacean	Crustacean	1	27508	0	0	0	0	0	0	0	0	0	0	0	0	0	15	9	31	184	983	2034	2504	2605	2299	1721	1518	2158	2181	1489	1209	1101	963	858	653	560	617	506	502	270	148	107	117
Australia	Crabs, not frozen	Imports	Crab	NA	NA	Crustacean	Crustacean	1	145	0	0	0	0	0	0	0	0	0	0	0	0	2	7	13	8	2	4	7	3	9	0	0	0	3	3	1	3	5	27	11	7	1	1	0	4	0	4	16	2
Australia	Crabs, peeled or not, live, fresh or chilled, nei	Exports	Crab	Live, fresh or chilled	NA	Crustacean	Crustacean	1	403.35	0	0	0	0	0	0	0	0	0	0	0	0	0	0	0	0	0	0	0	0	0	0	0	0	0	0	0	0	0	0	0	0	0	0	0	0	0	0	0	0
Australia	Crustaceans nei, dried, salted or in brine, smoked	Exports	Crustaceans	Dried	NA	Crustacean	Crustacean	2.54	1794.18	0	0	0	0	0	0	0	0	0	0	0	0	0	2.54	25.4	825.5	500.38	93.98	236.22	0	93.98	0	0	0	0	0	0	0	0	0	0	0	0	0	0	0	0	0	0	0
Australia	Crustaceans nei, even smoked, frozen	Exports	Crustaceans	Smoked	NA	Crustacean	Crustacean	2	5502.52	66	96	42	198	0	0	0	0	0	0	0	0	0	202	296	68	230	428	326	118	10	148	96	90	480	686	380	340	252	84	86	30	14	2	36	6	60	254	120	76
Australia	Crustaceans nei, even smoked, frozen	Imports	Crustaceans	Smoked	NA	Crustacean	Crustacean	2	15973.3	0	0	0	0	0	0	0	0	0	0	0	0	400	92	204	460	404	338	220	194	358	0	0	0	228	390	262	272	104	284	418	504	454	368	280	304	1460	2082	1296	1250
Australia	Crustaceans nei, prepared or preserved	Exports	Crustaceans	Prepared or preserved	NA	Crustacean	Crustacean	2.27	367.014	0	0	0	0	0	0	0	0	0	0	0	0	0	2.27	4.54	15.89	2.27	4.54	29.51	36.32	74.91	49.94	4.54	2.27	0	4.54	2.27	86.26	2.27	0	0	0	4.54	0	0	38.59	0	0	0	0
Australia	Crustaceans nei, prepared or preserved	Imports	Crustaceans	Prepared or preserved	NA	Crustacean	Crustacean	2.27	4377.6	0	0	0	0	0	143.01	147.55	231.54	170.25	231.54	263.32	342.77	93.07	199.76	297.37	143.01	127.12	106.69	45.4	0	22.7	0	0	0	18.16	15.89	20.43	147.55	61.29	102.15	49.94	13.62	131.66	177.06	158.9	124.85	24.97	52.21	13.62	131.66
Australia	Miscellaneous crustaceans, not frozen, nei	Exports	Crustaceans	NA	NA	Crustacean	Crustacean	1	1298	6	0	4	92	22	3	94	77	78	81	24	24	0	18	15	5	36	38	104	54	29	20	22	45	69	76	52	33	35	31	35	19	21	15	7	2	2	2	2	3
Australia	Miscellaneous crustaceans, not frozen, nei	Imports	Crustaceans	NA	NA	Crustacean	Crustacean	1	2477	139	141	105	276	110	70	132	125	179	248	280	308	173	6	39	35	16	5	6	3	3	0	0	0	12	2	5	5	6	2	5	3	0	1	1	1	7	6	8	7
Australia	Crustacean and mollusc preparations, not in airtight containers	Exports	Crustaceans and molluscs	Prepared or preserved	NA	Crustacean	Crustacean	2.27	4612.64	34.05	40.86	152.09	324.61	147.55	324.61	542.53	517.56	690.08	660.57	556.15	122.58	499.4	0	0	0	0	0	0	0	0	0	0	0	0	0	0	0	0	0	0	0	0	0	0	0	0	0	0	0
Australia	Crustacean and mollusc preparations, not in airtight containers	Imports	Crustaceans and molluscs	Prepared or preserved	NA	Crustacean	Crustacean	2.27	5148.36	329.15	124.85	143.01	3193.89	1357.46	0	0	0	0	0	0	0	0	0	0	0	0	0	0	0	0	0	0	0	0	0	0	0	0	0	0	0	0	0	0	0	0	0	0	0
Australia	Crustaceans and molluscs, dried, salted or in brine, nei	Exports	Crustaceans and molluscs	Dried	NA	Crustacean	Crustacean	2.54	2743.2	0	0	0	0	236.22	101.6	104.14	193.04	231.14	190.5	419.1	1267.46	0	0	0	0	0	0	0	0	0	0	0	0	0	0	0	0	0	0	0	0	0	0	0	0	0	0	0	0
Australia	Crustaceans and molluscs, dried, salted or in brine, nei	Imports	Crustaceans and molluscs	Dried	NA	Crustacean	Crustacean	2.54	5252.72	337.82	325.12	614.68	325.12	190.5	228.6	251.46	411.48	421.64	744.22	551.18	558.8	292.1	0	0	0	0	0	0	0	0	0	0	0	0	0	0	0	0	0	0	0	0	0	0	0	0	0	0	0
Australia	Crustaceans and molluscs, nei, frozen	Exports	Crustaceans and molluscs	Frozen	NA	Crustacean	Crustacean	1	10800	25	3	6	61	8730	194	47	32	37	68	155	252	1190	0	0	0	0	0	0	0	0	0	0	0	0	0	0	0	0	0	0	0	0	0	0	0	0	0	0	0
Australia	Crustaceans and molluscs, nei, frozen	Imports	Crustaceans and molluscs	Frozen	NA	Crustacean	Crustacean	1	14240	885	1371	953	1016	561	668	661	688	879	1271	1355	2472	1460	0	0	0	0	0	0	0	0	0	0	0	0	0	0	0	0	0	0	0	0	0	0	0	0	0	0	0
Australia	Crustaceans and molluscs, prepared or preserved, nei	Exports	Crustaceans and molluscs	Prepared or preserved	NA	Crustacean	Crustacean	2.27	728.67	13.62	74.91	43.13	47.67	65.83	140.74	81.72	29.51	88.53	59.02	22.7	15.89	45.4	0	0	0	0	0	0	0	0	0	0	0	0	0	0	0	0	0	0	0	0	0	0	0	0	0	0	0
Australia	Crustaceans and molluscs, prepared or preserved, nei	Imports	Crustaceans and molluscs	Prepared or preserved	NA	Crustacean	Crustacean	2.27	23760.1	908	1377.89	1302.98	885.3	696.89	115.77	99.88	95.34	104.42	52.21	56.75	61.29	43.13	0	0	0	0	0	0	4272.14	0	4356.13	4083.73	5248.24	0	0	0	0	0	0	0	0	0	0	0	0	0	0	0	0
Australia	Lobster tails or meat, prep. or pres.	Exports	Lobster	Prepared or preserved	Meat or tails	Crustacean	Crustacean	3.2461	360.317	0	0	0	0	0	0	0	0	0	0	0	0	0	9.7383	29.2149	0	230.473	12.9844	19.4766	12.9844	6.4922	0	0	0	0	0	0	0	0	0	0	9.7383	25.9688	3.2461	0	0	0	0	0	0
Australia	Lobster tails or meat, prep. or pres.	Imports	Lobster	Prepared or preserved	Meat or tails	Crustacean	Crustacean	3.2461	1311.2	0	0	0	0	0	0	0	0	0	0	0	0	25.9688	29.2149	25.9688	58.4298	29.2149	32.461	81.1525	0	6.4922	0	0	0	6.4922	0	6.4922	38.9532	6.4922	16.2305	12.9844	38.9532	81.1525	100.629	133.09	266.18	142.828	3.2461	12.9844	3.2461
Australia	Lobsters nei, whole, fresh or chilled	Imports	Lobster	Live, fresh or chilled	NA	Crustacean	Crustacean	1	4335	220	328	165	101	194	508	417	571	528	478	520	247	58	0	0	0	0	0	0	0	0	0	0	0	0	0	0	0	0	0	0	0	0	0	0	0	0	0	0	0
Australia	Lobsters, dried, salted or in brine, smoked nei	Exports	Lobster	Dried	NA	Crustacean	Crustacean	2.54	581.66	0	0	0	0	0	0	0	0	0	0	0	0	0	0	0	0	0	0	0	0	0	0	0	0	139.7	83.82	0	7.62	2.54	2.54	68.58	167.64	73.66	20.32	12.7	2.54	0	0	0	0
Australia	Rock lobster & other sea crawfish (Palinurus, Panulirus, Jasus), meat or tails, frozen	Exports	Lobster	Frozen	Meat or tails	Crustacean	Crustacean	1.43	1025.31	0	0	0	0	0	0	0	0	0	0	0	0	0	0	0	0	0	0	0	0	0	0	0	0	0	0	0	0	0	0	0	0	0	0	0	0	300.3	283.14	0	0
Australia	Rock lobster and other sea crawfish (Palinurus, Panulirus, Jasus), even smoked, frozen, nei	Exports	Lobster	Smoked	NA	Crustacean	Crustacean	2	980.02	0	0	0	0	0	0	0	0	0	0	0	0	0	0	0	0	0	0	0	0	0	0	0	0	0	0	0	0	0	0	0	0	0	0	0	0	494	342	0	0
Australia	Rock lobster and other sea crawfish (Palinurus, Panulirus, Jasus), even smoked, frozen, nei	Imports	Lobster	Smoked	NA	Crustacean	Crustacean	2	16153.6	0	0	0	0	0	0	0	0	0	0	0	0	48	250	66	92	74	68	172	316	208	0	0	0	398	258	308	434	424	520	576	802	444	618	840	830	950	802	992	900
Australia	Rock lobster and other sea crawfish (Palinurus, Panulirus, Jasus), whole, frozen	Exports	Lobster	Frozen	NA	Crustacean	Crustacean	1	134.58	0	0	0	0	0	0	0	0	0	0	0	0	0	0	0	0	0	0	0	0	0	0	0	0	0	0	0	0	0	0	0	0	0	0	0	0	84	33	0	0
Australia	Rock lobsters (Jasus spp.), meat or tails, fresh or chilled	Exports	Lobster	Live, fresh or chilled	Meat or tails	Crustacean	Crustacean	1.43	2639.78	0	0	0	0	0	0	0	0	0	0	0	0	0	41.47	153.01	74.36	644.93	872.3	397.54	0	111.54	0	0	0	147.29	35.75	0	27.17	48.62	30.03	1.43	14.3	0	1.43	34.32	4.29	0	0	0	0
Australia	Rock lobsters (Jasus spp.), meat or tails, frozen	Exports	Lobster	Frozen	Meat or tails	Crustacean	Crustacean	1.43	119514	5761.47	7132.84	6593.73	6659.51	6179.03	5083.65	6243.38	6868.29	7150	6044.61	5206.63	4969.25	8951.8	3507.79	3706.56	2305.16	2599.74	2092.09	1434.29	0	1917.63	0	0	0	2097.81	1241.24	0	2513.94	3186.04	2396.68	2159.3	2070.64	1399.97	998.14	623.48	418.99	0	0	0	0
Australia	Rock lobsters (Jasus spp.), nei, frozen	Exports	Lobster	Frozen	NA	Crustacean	Crustacean	1	4183	0	0	0	0	0	0	0	0	0	0	0	0	0	0	0	0	0	0	0	0	65	0	0	0	398	322	0	386	619	476	392	427	318	369	201	210	0	0	0	0
Australia	Rock lobsters (Jasus spp.), whole, fresh or chilled	Exports	Lobster	Live, fresh or chilled	NA	Crustacean	Crustacean	1	227352	210	155	711	1389	727	1788	1006	1117	1650	774	980	1620	0	2749	2111	2380	3984	6835	7934	8802	8622	9460	9496	10576	8110	7414	6083	6306	7305	6619	7267	5836	6214	6536	5544	5580	6556	7264	7954	7807
Australia	Rock lobsters (Jasus spp.), whole, frozen	Exports	Lobster	Frozen	NA	Crustacean	Crustacean	1	101809	123	203	357	314	461	363	402	585	1073	875	900	1533	2340	3983	3679	4515	5735	4654	6205	6204	4420	5849	5689	6667	5383	3612	4466	3702	3435	3309	2553	2066	2290	1301	1058	405	0	0	330	278
Australia	Norway lobsters (Nephrops spp.), nei, even smoked, frozen	Imports	Norway lobster (Nephrops norvegicus)	Smoked	NA	Crustacean	Crustacean	2	301.74	0	0	0	0	0	0	0	0	0	0	0	0	0	0	0	0	0	0	0	0	0	0	0	0	0	0	0	0	0	0	0	0	0	0	0	0	0	0	30	38
Australia	Shrimps and prawns, cooked, frozen	Imports	Shrimps and prawns	Frozen	NA	Crustacean	Crustacean	1	39939	0	0	0	0	0	0	0	0	0	0	0	0	0	0	0	0	0	0	0	0	0	0	0	0	0	0	0	0	0	6992	7714	6038	4396	4882	4969	4948	0	0	0	0
Australia	Shrimps and prawns, dried, salted or in brine, smoked nei	Imports	Shrimps and prawns	Dried	NA	Crustacean	Crustacean	2.54	766.724	0	0	0	0	0	0	0	0	0	0	0	0	0	0	0	0	0	0	0	0	0	0	0	0	0	0	0	0	0	0	0	0	0	0	0	0	0	0	0	0
Australia	Shrimps and prawns, fan tails, frozen	Exports	Shrimps and prawns	Frozen	Meat or tails	Crustacean	Crustacean	1.43	13758	577.72	1571.57	623.48	607.75	1269.84	124.41	231.66	317.46	486.2	401.83	453.31	560.56	0	197.34	278.85	125.84	180.18	210.21	88.66	0	201.63	0	0	0	271.7	449.02	0	247.39	340.34	201.63	174.46	380.38	533.39	406.12	962.39	1282.71	0	0	0	0
Australia	Shrimps and prawns, frozen, nei	Exports	Shrimps and prawns	Frozen	NA	Crustacean	Crustacean	1	295632	1310	2177	2283	4239	5018	6128	9909	9591	10404	8342	8768	9616	15200	9204	8508	9155	7429	6352	9185	14941	10761	13475	13031	14444	9198	11259	10448	8769	9105	9411	7189	4029	4210	3528	4706	4310	0	0	0	0
Australia	Shrimps and prawns, frozen, nei	Imports	Shrimps and prawns	Frozen	NA	Crustacean	Crustacean	1	193703	1330	616	504	1899	1485	2572	2684	3844	3194	4513	4402	6360	4925	5947	5508	6893	6772	6590	8304	7928	8071	8744	9109	10108	9508	11394	12005	18235	20259	0	0	0	0	0	0	0	0	0	0	0
Australia	Shrimps and prawns, frozen, nei	Reexports	Shrimps and prawns	Frozen	NA	Crustacean	Crustacean	1	200	0	0	0	0	0	0	0	0	0	0	0	0	0	0	0	0	0	0	0	0	0	35	59	106	0	0	0	0	0	0	0	0	0	0	0	0	0	0	0	0
Australia	Shrimps and prawns, live, fresh or chilled, nei	Imports	Shrimps and prawns	Live, fresh or chilled	NA	Crustacean	Crustacean	1	1361.02	0	0	0	0	0	0	0	0	0	0	0	0	70	248	267	234	180	91	45	63	95	0	0	0	0	0	0	0	0	0	0	0	0	0	0	0	0	0	0	0
Australia	Shrimps and prawns, not cooked, frozen	Imports	Shrimps and prawns	Frozen	NA	Crustacean	Crustacean	1	95080	0	0	0	0	0	0	0	0	0	0	0	0	0	0	0	0	0	0	0	0	0	0	0	0	0	0	0	0	0	15319	18397	16751	7670	11401	11726	13816	0	0	0	0
Australia	Shrimps and prawns, not frozen, nei	Exports	Shrimps and prawns	NA	NA	Crustacean	Crustacean	1	17131	170	71	183	358	430	768	894	167	28	81	73	121	0	577	1408	1951	1404	1030	812	1120	1301	920	1256	520	284	265	269	112	184	56	156	43	40	13	7	5	39	2	9	4
Australia	Shrimps and prawns, not frozen, nei	Imports	Shrimps and prawns	NA	NA	Crustacean	Crustacean	1	5203	0	0	0	0	0	0	0	0	0	0	0	0	107	223	190	416	275	253	447	648	382	0	0	0	145	820	154	79	105	155	28	129	80	79	79	75	55	64	71	75
Australia	Shrimps and prawns, other than coldwater, even smoked, frozen	Exports	Shrimps and prawns	Smoked	NA	Crustacean	Crustacean	2	86667.1	0	0	0	0	0	0	0	0	0	0	0	0	0	0	0	0	0	0	0	0	0	0	0	0	0	0	0	0	0	0	0	0	0	0	0	0	6940	10238	12638	12596
Australia	Shrimps and prawns, other than coldwater, even smoked, frozen	Imports	Shrimps and prawns	Smoked	NA	Crustacean	Crustacean	2	300347	0	0	0	0	0	0	0	0	0	0	0	0	0	0	0	0	0	0	0	0	0	0	0	0	0	0	0	0	0	0	0	0	0	0	0	0	42994	43390	47072	39888
Australia	Shrimps and prawns, prep. or pres., in airtight containers	Exports	Shrimps and prawns	Prepared or preserved	NA	Crustacean	Crustacean	2.27	1540.58	0	0	0	0	0	0	0	0	0	0	0	0	0	0	0	0	0	0	0	0	0	0	0	0	0	0	0	0	0	0	0	0	0	0	0	0	224.73	143.01	140.74	140.74
Australia	Shrimps and prawns, prep. or pres., in airtight containers	Imports	Shrimps and prawns	Prepared or preserved	NA	Crustacean	Crustacean	2.27	141667	674.19	971.56	1293.9	2006.68	2086.13	1343.84	1357.46	1357.46	1770.6	1720.66	1627.59	1468.69	1534.52	1191.75	1564.03	1266.66	1162.24	980.64	794.5	812.66	665.11	0	0	0	0	0	0	0	0	898.92	867.14	919.35	964.75	1146.35	1759.25	1613.97	13554.2	11375	12741.5	10276.3
Australia	Shrimps and prawns, prep. or pres., not in airtight containers	Exports	Shrimps and prawns	Prepared or preserved	NA	Crustacean	Crustacean	2.27	1654.72	0	0	0	0	0	0	0	0	0	0	0	0	0	170.25	90.8	106.69	156.63	104.42	140.74	0	27.24	0	0	0	0	0	0	0	0	0	0	0	0	0	0	0	20.43	13.62	74.91	59.02
Australia	Shrimps and prawns, prep. or pres., not in airtight containers	Imports	Shrimps and prawns	Prepared or preserved	NA	Crustacean	Crustacean	2.27	512720	8569.25	10169.6	7624.93	2817.07	3484.45	7055.16	9461.36	7436.52	8853	8882.51	9724.68	10208.2	10494.2	11127.5	9701.98	11261.5	10680.4	12140	10215	0	10893.7	0	0	0	0	0	0	0	0	15844.6	16039.8	18441.5	32261.2	32899.1	36928.4	33087.5	21117.8	17815	16636.8	15581.3
Australia	Shrimps and prawns, tails, shell on, frozen	Exports	Shrimps and prawns	Frozen	Meat or tails	Crustacean	Crustacean	1.43	98100.9	5671.38	6500.78	6928.35	6882.59	8249.67	6833.97	6778.2	5611.32	5662.8	5248.1	5828.68	4320.03	0	2608.32	2310.88	2263.69	1337.05	2030.6	2798.51	0	3270.41	0	0	0	1129.7	1367.08	0	457.6	509.08	461.89	153.01	284.57	890.89	420.42	765.05	526.24	0	0	0	0
Australia	Shrimps, prawns, prepared or preserved, nei	Exports	Shrimps and prawns	Prepared or preserved	NA	Crustacean	Crustacean	2.27	2388.04	0	0	0	0	0	0	0	0	0	0	0	0	0	4.54	22.7	13.62	6.81	4.54	6.81	34.05	2.27	138.47	301.91	106.69	199.76	106.69	59.02	24.97	99.88	95.34	102.15	320.07	256.51	247.43	170.25	63.56	0	0	0	0
Australia	Shrimps, prawns, prepared or preserved, nei	Imports	Shrimps and prawns	Prepared or preserved	NA	Crustacean	Crustacean	2.27	100400	0	0	0	0	0	0	0	0	0	0	0	0	18.16	213.38	224.73	183.87	152.09	133.93	158.9	0	129.39	11506.6	12934.5	12834.6	11057.2	12242.1	12006	11747.2	14857.1	0	0	0	0	0	0	0	0	0	0	0
Australia	Cold-water shrimps and prawns (Pandalus spp., Crangon crangon), frozen, even smoked, whether in shell or not	Exports	Shrimps and prawns (Pandalus spp.)	Smoked	In shell or not	Crustacean	Crustacean	2.42	6223.97	0	0	0	0	0	0	0	0	0	0	0	0	0	0	0	0	0	0	0	0	0	0	0	0	0	0	0	0	0	0	0	0	0	0	0	0	421.08	786.5	2911.26	648.56
Australia	Cold-water shrimps and prawns (Pandalus spp., Crangon crangon), frozen, even smoked, whether in shell or not	Imports	Shrimps and prawns (Pandalus spp.)	Smoked	In shell or not	Crustacean	Crustacean	2.42	8687.49	0	0	0	0	0	0	0	0	0	0	0	0	0	0	0	0	0	0	0	0	0	0	0	0	0	0	0	0	0	0	0	0	0	0	0	0	1427.8	793.76	212.96	53.24
Australia	Spiny lobsters (Panulirus spp.), meat or tails, fresh or chilled	Exports	Spiny lobsters (Panulirus spp.)	Live, fresh or chilled	Meat or tails	Crustacean	Crustacean	1.43	187.33	0	0	0	0	0	0	0	0	0	0	0	0	0	7.15	4.29	18.59	2.86	11.44	61.49	0	81.51	0	0	0	0	0	0	0	0	0	0	0	0	0	0	0	0	0	0	0
Australia	Spiny lobsters (Panulirus spp.), whole, fresh or chilled	Exports	Spiny lobsters (Panulirus spp.)	Live, fresh or chilled	NA	Crustacean	Crustacean	1	226	0	0	0	0	0	0	0	0	0	0	0	0	0	9	34	14	31	66	60	0	12	0	0	0	0	0	0	0	0	0	0	0	0	0	0	0	0	0	0	0
Australia	Spiny lobsters (Panulirus spp.), whole, frozen	Exports	Spiny lobsters (Panulirus spp.)	Frozen	NA	Crustacean	Crustacean	1	1851	0	0	0	0	0	0	0	0	0	0	0	0	0	118	437	252	357	217	220	0	107	0	0	0	63	42	0	5	1	10	2	2	0	16	2	0	0	0	0	0
Australia	Dogfish and other sharks nei (excl. Squalus acanthias, Scyliorhinus spp., Lamna nasus, Prionace glauca), frozen	Exports	Dogfish and other sharks	Frozen	NA	Dogfish and other sharks	Fish	1	666.55	0	0	0	0	0	0	0	0	0	0	0	0	0	7	10	273	5	24	5	3	0	0	10	13	13	18	1	3	32	40	49	42	15	61	40	0	0	0	0	0
Australia	Dogfish and other sharks nei (excl. Squalus acanthias, Scyliorhinus spp., Lamna nasus, Prionace glauca), frozen	Imports	Dogfish and other sharks	Frozen	NA	Dogfish and other sharks	Fish	1	824.55	0	0	0	0	0	0	0	0	0	0	0	0	33	14	13	1	0	40	34	19	14	0	0	0	128	146	41	36	80	15	5	0	1	1	2	0	16	49	114	0
Australia	Dogfish, other sharks, rays and skates (Rajidae), fillets, frozen	Imports	Dogfish and other sharks	Frozen	Fillets	Dogfish and other sharks	Fish	1.25	1019.15	0	0	0	0	0	0	0	0	0	0	0	0	0	0	0	0	0	0	0	0	0	0	0	0	0	0	0	0	0	0	0	0	0	0	0	0	0	0	0	0
Australia	Eels and elvers live	Exports	Eels	Live, fresh or chilled	NA	Eels	Fish	1	6574.54	0	0	0	0	0	0	0	0	0	0	0	0	0	0	0	0	0	0	443	445	414	307	290	227	322	438	393	325	295	210	215	229	243	169	188	248	324	243	186	177
Australia	Eels, fresh or chilled	Exports	Eels	Live, fresh or chilled	NA	Eels	Fish	1	337	0	0	0	0	0	0	0	0	0	0	0	0	0	11	8	1	11	15	13	16	2	36	16	64	95	21	6	2	6	7	1	1	2	0	1	0	0	2	0	0
Australia	Eels, fresh or chilled	Imports	Eels	Live, fresh or chilled	NA	Eels	Fish	1	117	0	0	0	0	0	0	0	0	0	0	0	0	0	6	5	2	12	5	2	19	16	0	0	0	8	8	7	4	0	1	1	0	0	0	0	0	0	0	4	0
Australia	Eels, frozen	Exports	Eels	Frozen	NA	Eels	Fish	1	3054	0	0	0	0	0	0	0	0	0	0	0	0	0	216	235	250	290	325	198	241	230	159	170	133	98	115	26	22	68	56	18	76	0	0	0	79	29	20	0	0
Australia	Eels, frozen	Imports	Eels	Frozen	NA	Eels	Fish	1	1379.1	0	0	0	0	0	0	0	0	0	0	0	0	12	7	19	19	71	64	58	65	35	0	0	0	40	55	47	101	97	74	158	101	46	69	104	66	5	26	20	6
Australia	River eels, prepared or preserved, not minced, nei	Imports	Eels	Prepared or preserved	NA	Eels	Fish	2.66	4533.62	0	0	0	0	0	0	0	0	0	0	0	0	0	0	0	0	0	0	0	0	0	0	0	0	0	0	0	0	0	0	0	0	0	0	0	0	226.1	340.48	489.44	428.26
Australia	Fish dried, whether or not salted, nei	Exports	Fish	Dried	NA	Fish	Fish	2.82	6704.18	50.76	19.74	78.96	25.38	47.94	42.3	42.3	157.92	50.76	14.1	84.6	56.4	98.7	31.02	67.68	50.76	64.86	104.34	78.96	104.34	124.08	180.48	265.08	205.86	321.48	282	296.1	349.68	355.32	324.3	298.92	360.96	315.84	456.84	358.14	301.74	276.36	231.24	109.98	2.82
Australia	Fish dried, whether or not salted, nei	Imports	Fish	Dried	NA	Fish	Fish	2.82	24609.3	0	0	0	0	0	0	0	0	0	0	0	0	135.36	930.6	465.3	541.44	501.96	544.26	586.56	767.04	750.12	1418.46	1488.96	1271.82	944.7	817.8	806.52	998.28	868.56	871.38	874.2	826.26	823.44	792.42	893.94	767.04	659.88	606.3	611.94	707.82
Australia	Fish fillets, dried, salted or in brine, nei	Exports	Fish	Dried	Fillets	Fish	Fish	2.82	349.849	0	0	0	0	0	0	0	0	0	0	0	0	0	0	19.74	0	2.82	5.64	19.74	2.82	0	2.82	8.46	25.38	28.2	64.86	16.92	14.1	5.64	8.46	2.82	56.4	19.74	2.82	2.82	0	14.1	0	0	11.28
Australia	Fish fillets, dried, salted or in brine, nei	Imports	Fish	Dried	Fillets	Fish	Fish	2.82	15073.7	0	0	0	0	0	0	0	0	0	0	0	0	219.96	795.24	750.12	200.22	456.84	507.6	448.38	355.32	310.2	0	0	0	389.16	383.52	403.26	406.08	394.8	501.96	341.22	707.82	713.46	792.42	490.68	600.66	758.58	580.92	634.5	640.14
Australia	Fish fillets, fresh or chilled, nei	Exports	Fish	Live, fresh or chilled	Fillets	Fish	Fish	1.25	13352.6	0	0	0	27.5	23.75	26.25	78.75	37.5	22.5	26.25	32.5	126.25	225	420	353.75	535	1910	201.25	540	437.5	441.25	667.5	641.25	936.25	793.75	765	705	180	130	341.25	1040	980	31.25	152.5	98.75	76.25	1.25	12.5	6.25	12.5
Australia	Fish fillets, fresh or chilled, nei	Imports	Fish	Live, fresh or chilled	Fillets	Fish	Fish	1.25	37208.2	0	0	0	1303.75	680	315	1172.5	811.25	496.25	201.25	208.75	92.5	221.25	548.75	416.25	438.75	507.5	440	581.25	506.25	398.75	380	285	276.25	922.5	241.25	393.75	527.5	350	500	721.25	827.5	820	917.5	1246.25	1126.25	2906.25	2936.25	2321.25	2448.75
Australia	Fish fillets, frozen, nei	Exports	Fish	Frozen	Fillets	Fish	Fish	1.25	98307.8	0	0	0	180	142.5	195	723.75	616.25	506.25	510	585	1998.75	2700	3037.5	9846.25	10283.8	6398.75	6410	2875	4275	2588.75	3000	5778.75	7271.25	3048.75	3896.25	3871.25	2605	3382.5	2580	1367.5	250	405	1035	1751.25	1477.5	751.25	78.75	156.25	217.5
Australia	Fish fillets, frozen, nei	Imports	Fish	Frozen	Fillets	Fish	Fish	1.25	1.17561e+06	21371.2	21568.8	21757.5	19500	20197.5	15660	9022.5	0	0	0	0	0	5772.5	11953.8	13336.2	12395	15060	14851.2	20308.8	20215	21155	20367.5	27242.5	29180	46572.5	45200	47216.2	48687.5	48638.8	40835	44962.5	46053.8	45910	43087.5	49275	47023.8	36131.2	36995	37808.8	35602.5
Australia	Fish fillets, frozen, nei	Reexports	Fish	Frozen	Fillets	Fish	Fish	1.25	200	0	0	0	0	0	0	0	0	0	0	0	0	0	0	0	0	0	0	0	0	0	100	22.5	77.5	0	0	0	0	0	0	0	0	0	0	0	0	0	0	0	0
Australia	Fish fillets, prep. or pres, incl. raw, coated in batter or breadcrum, cooked or not, frozen	Imports	Fish	Frozen	Fillets	Fish	Fish	1.25	102021	8487.5	12325	10445	9915	11843.8	7293.75	5887.5	5567.5	8198.75	7860	7047.5	5592.5	1557.5	0	0	0	0	0	0	0	0	0	0	0	0	0	0	0	0	0	0	0	0	0	0	0	0	0	0	0
Australia	Fish heads, tail, maws etc., smoked, dried, salted, or in brine	Exports	Fish	Smoked	Heads, tails, maws	Fish	Fish	10	1024.7	0	0	0	0	0	0	0	0	0	0	0	0	0	0	0	0	0	0	0	0	0	0	0	0	0	0	0	0	0	0	0	0	0	0	0	0	0	0	0	0
Australia	Fish heads, tail, maws etc., smoked, dried, salted, or in brine	Imports	Fish	Smoked	Heads, tails, maws	Fish	Fish	10	6111.3	0	0	0	0	0	0	0	0	0	0	0	0	0	0	0	0	0	0	0	0	0	0	0	0	0	0	0	0	0	0	0	0	0	0	0	0	1290	740	630	1110
Australia	Fish heads, tails, maws, tongues, nei frozen	Exports	Fish	Frozen	Heads, tails, maws	Fish	Fish	5	1774.5	0	0	0	0	0	0	0	0	0	0	0	0	0	0	0	0	0	0	0	0	0	0	0	0	0	0	0	0	0	0	0	0	0	0	0	0	0	0	0	0
Australia	Fish heads, tails, maws, tongues, nei frozen	Imports	Fish	Frozen	Heads, tails, maws	Fish	Fish	5	1107	0	0	0	0	0	0	0	0	0	0	0	0	0	0	0	0	0	0	0	0	0	0	0	0	0	0	0	0	0	0	0	0	0	0	0	0	0	0	0	0
Australia	Fish live, nei	Exports	Fish	Live, fresh or chilled	NA	Fish	Fish	1	8557.88	0	0	0	0	0	0	0	0	0	0	0	0	0	0	0	0	0	0	22	70	187	153	57	40	13	92	388	585	539	734	724	671	685	593	547	344	224	216	198	228
Australia	Fish meat, whether or not minced nei, fresh or chilled	Imports	Fish	Live, fresh or chilled	Meat	Fish	Fish	1.25	225.25	0	0	0	0	0	0	0	0	0	0	0	0	0	0	0	0	0	0	0	0	0	0	0	0	0	0	0	0	0	0	0	0	0	0	0	0	28.75	23.75	76.25	20
Australia	Fish meat, whether or not minced, frozen, nei	Exports	Fish	Frozen	Meat	Fish	Fish	1.25	35848.5	0	0	0	0	0	0	0	0	0	0	0	0	0	103.75	273.75	556.25	755	1118.75	655	3125	308.75	4816.25	3132.5	3950	2117.5	1928.75	1972.5	1476.25	1620	1473.75	1141.25	625	772.5	423.75	627.5	725	450	537.5	345	291.25
Australia	Fish meat, whether or not minced, frozen, nei	Imports	Fish	Frozen	Meat	Fish	Fish	1.25	135247	0	0	0	0	0	0	0	0	0	0	0	0	683.75	1893.75	2887.5	3088.75	2538.75	2533.75	1435	3148.75	4820	5738.75	4410	5256.25	6013.75	9108.75	7863.75	9253.75	9080	5216.25	3348.75	4407.5	3952.5	4235	3053.75	3025	3831.25	3057.5	4237.5	3693.75
Australia	Fish minced (=surimi), frozen	Imports	Fish	Frozen	Minced	Fish	Fish	1.25	796.25	0	0	0	0	0	0	121.25	220	63.75	21.25	216.25	92.5	61.25	0	0	0	0	0	0	0	0	0	0	0	0	0	0	0	0	0	0	0	0	0	0	0	0	0	0	0
Australia	Fish minced nei, in airtight containers prepared or preserved	Exports	Fish	Prepared or preserved	Minced	Fish	Fish	2.66	885.78	0	0	0	0	0	0	0	0	0	0	0	0	0	135.66	119.7	47.88	250.04	103.74	34.58	0	194.18	0	0	0	0	0	0	0	0	0	0	0	0	0	0	0	0	0	0	0
Australia	Fish minced nei, not in airtight containers prepared or preserved	Exports	Fish	Prepared or preserved	Minced	Fish	Fish	2.66	957.6	0	0	0	0	0	0	0	0	0	0	0	0	0	5.32	21.28	2.66	66.5	146.3	446.88	0	268.66	0	0	0	0	0	0	0	0	0	0	0	0	0	0	0	0	0	0	0
Australia	Fish minced nei, prepared or preserved	Exports	Fish	Prepared or preserved	Minced	Fish	Fish	2.66	29334	0	0	0	0	0	0	0	0	0	0	0	0	0	0	0	0	0	0	0	574.56	0	614.46	329.84	489.44	529.34	1162.42	864.5	1013.46	428.26	651.7	1447.04	2338.14	3583.02	1566.74	194.18	210.14	569.24	372.4	1173.06	2404.64
Australia	Fish minced nei, prepared or preserved	Imports	Fish	Prepared or preserved	Minced	Fish	Fish	2.66	505498	0	0	0	0	0	0	0	0	0	0	0	0	0	0	0	0	0	0	0	0	0	12004.6	11701.3	14568.8	23870.8	30222.9	27695.9	31497.1	28251.9	24711.4	21104.4	24142.2	17790.1	18393.9	19590.9	22024.8	21921.1	23408	21721.6	25347.1
Australia	Fish nei, dried, unsalted	Imports	Fish	Dried	NA	Fish	Fish	2.82	11485.9	211.5	538.62	313.02	197.4	273.54	282	250.98	259.44	290.46	335.58	1085.7	1314.12	6133.5	0	0	0	0	0	0	0	0	0	0	0	0	0	0	0	0	0	0	0	0	0	0	0	0	0	0	0
Australia	Fish nei, prepared or preserved, not minced	Exports	Fish	Prepared or preserved	NA	Fish	Fish	2.66	18418.1	393.68	526.68	202.16	279.3	359.1	351.12	343.14	391.02	353.78	313.88	505.4	691.6	758.1	223.44	276.64	109.06	1542.8	284.62	297.92	901.74	949.62	694.26	542.64	13.3	34.58	61.18	133	172.9	31.92	50.54	37.24	444.22	723.52	425.6	720.86	337.82	340.48	234.08	1141.14	276.64
Australia	Fish nei, prepared or preserved, not minced	Imports	Fish	Prepared or preserved	NA	Fish	Fish	2.66	223845	191.52	289.94	393.68	215.46	449.54	425.6	2149.28	1492.26	1279.46	2085.44	1566.74	1186.36	494.76	0	0	0	0	0	0	0	0	7471.94	5487.58	4785.34	4149.6	5703.04	6131.3	8046.5	8073.1	0	0	0	0	0	0	0	21035.3	23937.3	20160.1	14425.2
Australia	Fish nei, salted or in brine	Exports	Fish	Salted	NA	Fish	Fish	2.82	2702.41	0	0	0	0	0	0	0	0	0	0	0	0	0	31.02	33.84	47.94	104.34	22.56	152.28	188.94	186.12	975.72	439.92	211.5	16.92	59.22	19.74	64.86	36.66	11.28	8.46	0	25.38	8.46	5.64	2.82	5.64	11.28	5.64	16.92
Australia	Fish nei, salted or in brine	Imports	Fish	Salted	NA	Fish	Fish	2.82	47386.1	1849.92	2757.96	2662.08	2450.58	2236.26	2233.44	2360.34	1928.88	1982.46	1841.46	1923.24	1703.28	1159.02	521.7	338.4	259.44	293.28	431.46	338.4	865.74	279.18	967.26	1099.8	3127.38	3454.5	510.42	564	944.7	400.44	470.94	761.4	530.16	448.38	521.7	549.9	456.84	459.66	318.66	245.34	287.64
Australia	Fish nei, smoked	Exports	Fish	Smoked	NA	Fish	Fish	2.5	1535.25	0	0	0	0	0	0	0	0	0	0	0	0	0	55	95	137.5	80	82.5	92.5	22.5	87.5	27.5	17.5	10	575	5	17.5	17.5	2.5	15	70	40	5	12.5	15	35	2.5	0	0	0
Australia	Fish nei, smoked	Imports	Fish	Smoked	NA	Fish	Fish	2.5	195102	7915	10150	4925	8735	7920	7645	8505	8802.5	9795	9537.5	8467.5	7195	4820	1705	2780	2712.5	3992.5	3057.5	3657.5	3337.5	4695	4725	3827.5	5495	3215	2305	2655	2150	2360	2742.5	3480	3377.5	3370	2925	2697.5	3782.5	2827.5	2372.5	1537.5	1432.5
Australia	Fish not minced, prep. or pres., in airtight containers	Imports	Fish	Prepared or preserved	NA	Fish	Fish	2.66	40573	960.26	1729	2675.96	1252.86	2053.52	1393.84	1883.28	875.14	1787.52	1875.3	1125.18	1431.08	1721.02	1300.74	1899.24	1348.62	1521.52	1915.2	2926	0	4615.1	0	0	0	0	0	0	0	0	553.28	462.84	550.62	643.72	848.54	643.72	579.88	0	0	0	0
Australia	Fish not minced, prep. or pres., not in airtight containers	Imports	Fish	Prepared or preserved	NA	Fish	Fish	2.66	193470	0	0	0	0	0	0	0	0	0	0	0	0	2606.8	6397.3	7051.66	8437.52	10326.1	9464.28	13300	6008.94	10004.3	0	0	0	0	0	0	0	0	7530.46	10658.6	13257.4	18955.2	21378.4	25323.2	22769.6	0	0	0	0
Australia	Fish, fresh or chilled, nei	Exports	Fish	Live, fresh or chilled	NA	Fish	Fish	1	30254	0	0	0	73	235	163	146	64	163	351	634	1434	1600	233	176	192	94	323	365	686	849	1476	814	686	436	689	2102	2165	1586	1254	1097	516	959	1471	1559	978	342	111	210	466
Australia	Fish, fresh or chilled, nei	Imports	Fish	Live, fresh or chilled	NA	Fish	Fish	1	143870	0	0	0	1228	1327	1662	1653	1266	1051	1237	1519	1076	1056	1281	1384	1711	1991	2023	2123	2200	2771	3094	3517	3870	3565	3408	3607	3718	3841	4335	4683	5153	5657	6311	6111	5826	6478	6772	6515	6162
Australia	Fish, frozen, nei	Exports	Fish	Frozen	NA	Fish	Fish	1	98978.1	450	395	653	818	1956	1213	1227	1102	1840	1443	3579	2625	2160	619	1036	1201	1314	1289	1994	4453	1692	4401	6899	5457	992	1208	7258	6122	3805	3854	3171	1162	1312	671	1050	1062	1646	1009	1771	2762
Australia	Fish, frozen, nei	Imports	Fish	Frozen	NA	Fish	Fish	1	190355	2232	2937	3420	3280	6184	6829	4154	3311	5476	9908	8629	10869	4559	2942	2587	3514	5342	3515	4532	3032	2944	5595	6083	5422	2410	2614	3104	4339	3139	3766	3645	3800	4218	3963	3311	3810	3506	3682	3930	3700
Australia	Fish paste	Imports	Fish	Paste	NA	Fish	Fish	0.88	2364.56	110.88	97.68	93.28	79.2	148.72	93.28	435.6	672.32	114.4	140.8	140.8	168.08	69.52	0	0	0	0	0	0	0	0	0	0	0	0	0	0	0	0	0	0	0	0	0	0	0	0	0	0	0
Australia	Flatfish nei, fillets, frozen	Imports	Flatfish	Frozen	Fillets	Flatfish	Fish	1.25	1274.94	0	0	0	0	0	0	0	0	0	0	0	0	0	0	0	0	0	0	0	0	0	0	0	0	0	0	0	0	0	0	0	0	0	0	0	0	397.5	235	183.75	103.75
Australia	Flatfish nei, frozen	Exports	Flatfish	Frozen	NA	Flatfish	Fish	1	2709.91	0	0	0	0	0	0	0	0	0	0	0	0	0	57	388	159	158	48	184	3	62	58	60	63	54	264	168	105	234	277	125	15	45	65	31	60	0	3	0	20
Australia	Flatfish nei, frozen	Imports	Flatfish	Frozen	NA	Flatfish	Fish	1	12840.7	0	0	0	0	0	0	0	0	0	0	0	0	278	458	256	231	266	455	497	409	434	0	0	0	505	541	552	530	761	868	621	732	637	531	523	479	461	359	360	317
Australia	Flatfish, fresh or chilled, nei	Exports	Flatfish	Live, fresh or chilled	NA	Flatfish	Fish	1	763.07	0	0	0	0	0	0	0	0	0	0	0	0	0	83	145	64	34	31	26	74	10	19	3	2	14	17	10	15	41	18	25	65	0	24	21	8	0	0	0	0
Australia	Flatfish, fresh or chilled, nei	Imports	Flatfish	Live, fresh or chilled	NA	Flatfish	Fish	1	1091.3	0	0	0	0	0	0	0	0	0	0	0	0	123	21	14	3	10	21	31	14	26	0	0	0	27	10	8	17	22	35	20	24	16	56	49	30	42	41	58	71
Australia	Hake fillets in blocks, frozen	Imports	Hake	Frozen	Fillets	Hake	Fish	1.25	165232	0	0	0	0	0	0	4571.25	11883.8	15523.8	16671.2	15356.2	19357.5	22571.2	9961.25	3088.75	4228.75	6743.75	5676.25	4392.5	3226.25	4097.5	0	0	0	0	0	0	0	0	3617.5	4415	4773.75	1687.5	936.25	1255	1197.5	0	0	0	0
Australia	Hake minced, frozen	Imports	Hake	Frozen	Minced	Hake	Fish	1.25	43387.5	0	0	0	0	0	0	965	487.5	771.25	2276.25	1485	2133.75	3441.25	3182.5	3028.75	2300	1646.25	3615	1321.25	1521.25	2888.75	2576.25	2232.5	1376.25	0	0	0	0	0	2682.5	1557.5	1492.5	405	1.25	0	0	0	0	0	0
Australia	Hake nei fillets, frozen	Imports	Hake	Frozen	Fillets	Hake	Fish	1.25	245782	0	0	0	0	4925	12555	8625	0	0	0	0	0	0	6295	11028.8	11245	9221.25	10425	11827.5	13202.5	12328.8	17730	15598.8	15733.8	0	0	0	0	0	4435	3816.25	3777.5	5258.75	5986.25	6620	5722.5	6723.75	6728.75	5682.5	6536.25
Australia	Hakes nei, frozen	Exports	Hake	Frozen	NA	Hake	Fish	1	1347	0	0	0	0	0	0	0	0	0	0	0	0	0	6	9	0	0	44	8	0	0	839	3	239	59	36	0	0	0	8	0	57	0	0	0	0	1	0	17	0
Australia	Hakes nei, frozen	Imports	Hake	Frozen	NA	Hake	Fish	1	8781.18	0	0	0	0	583	1510	751	437	546	1119	602	357	314	125	25	360	203	405	61	33	351	405	24	3	22	9	2	6	5	0	0	0	1	2	7	0	29	38	93	70
Australia	Halibuts nei, frozen	Imports	Halibut	Frozen	NA	Halibut	Fish	1	224.7	0	0	0	0	0	0	0	0	0	0	0	0	0	7	6	0	0	3	0	12	5	0	0	0	30	0	0	0	0	1	4	5	5	8	11	9	4	11	11	26
Australia	Herring, salted or in brine	Imports	Herring	Salted	NA	Herring	Fish	2.82	1716.25	0	0	0	0	0	0	0	0	0	0	0	0	521.7	59.22	47.94	8.46	2.82	8.46	16.92	36.66	19.74	0	0	0	8.46	155.1	50.76	47.94	28.2	39.48	115.62	366.6	11.28	5.64	2.82	14.1	2.82	31.02	11.28	14.1
Australia	Herrings minced, prepared or preserved	Imports	Herring	Prepared or preserved	Minced	Herring	Fish	2.66	532	0	0	0	0	0	0	0	0	0	0	0	0	15.96	140.98	130.34	77.14	39.9	37.24	26.6	0	63.84	0	0	0	0	0	0	0	0	0	0	0	0	0	0	0	0	0	0	0
Australia	Herrings nei, frozen	Exports	Herring	Frozen	NA	Herring	Fish	1	169	0	0	0	0	0	0	0	0	0	0	0	0	0	0	0	0	0	0	0	0	0	0	0	0	0	93	0	0	0	0	0	0	50	14	0	0	0	0	0	0
Australia	Herrings nei, frozen	Imports	Herring	Frozen	NA	Herring	Fish	1	8217.02	0	0	0	0	0	0	0	0	0	0	0	0	773	124	64	863	1446	1278	156	209	345	0	0	0	68	52	14	1	8	21	17	13	20	1	3	147	1	890	365	10
Australia	Herrings nei, smoked	Imports	Herring	Smoked	NA	Herring	Fish	2.5	8455.27	0	0	0	0	0	0	0	0	0	0	0	0	225	535	2457.5	652.5	235	272.5	142.5	125	170	207.5	182.5	120	112.5	132.5	122.5	187.5	160	110	177.5	200	150	225	210	220	187.5	165	102.5	142.5
Australia	Herrings prepared or preserved, not minced, nei	Imports	Herring	Prepared or preserved	NA	Herring	Fish	2.66	50809.6	0	0	0	0	0	0	0	0	0	0	0	0	0	0	0	0	0	0	0	0	0	2689.26	2396.66	2359.42	2681.28	2205.14	2793	2268.98	1920.52	2561.58	2375.38	1598.66	2202.48	2468.48	1907.22	2077.46	2138.64	2159.92	1697.08	1981.7
Australia	Herrings, not minced, prep. or pres. in airtight containers, nei	Imports	Herring	Prepared or preserved	NA	Herring	Fish	2.66	52771.7	3218.6	4240.04	3133.48	2787.68	2117.36	3226.58	2646.7	2255.68	2391.34	2612.12	2135.98	1359.26	2218.44	3154.76	3098.9	2790.34	2572.22	2154.6	2128	0	2529.66	0	0	0	0	0	0	0	0	0	0	0	0	0	0	0	0	0	0	0
Australia	Herrings, not minced, prep. or pres., not in airtight containers	Imports	Herring	Prepared or preserved	NA	Herring	Fish	2.66	3710.7	0	0	0	0	0	0	0	0	0	0	0	0	109.06	61.18	45.22	29.26	53.2	42.56	532	2785.02	53.2	0	0	0	0	0	0	0	0	0	0	0	0	0	0	0	0	0	0	0
Australia	Herring,achovy,sardine,sardinella,brisling/sprat,mackerel,Indian mackerel,seerfish,jack&horse mackerel,jack,crevalle,cobia,silver pomfret,Pacif.saury,scad,capelin,etc,dried,salted or not,not smoked	Imports	Herring,achovy,sardine,sardinella,brisling/sprat,mackerel,Indian mackerel,seerfish,jack&horse mackerel,jack,crevalle,cobia,silver pomfret,Pacif.saury,scad,capelin,etc	Salted	NA	Herring and anchovy and sardine	Fish	2.82	646.711	0	0	0	0	0	0	0	0	0	0	0	0	0	0	0	0	0	0	0	0	0	0	0	0	0	0	0	0	0	0	0	0	0	0	0	0	0	0	0	0
Australia	Indian mackerels, seerfishes, jacks, crevalles, silver pomfrets, Pacific saury, scads, capelin, Kawakawa, bonitos, marlins, sailfishes, spearfish, fresh or chilled	Exports	Indian mackerels, seerfishes, jacks, crevalles, silver pomfrets, Pacific saury, scads, capelin, Kawakawa, bonitos, marlins, sailfishes, spearfish	Live, fresh or chilled	NA	Indian mackerels and seerfishes and jacks	Fish	1	964.34	0	0	0	0	0	0	0	0	0	0	0	0	0	0	0	0	0	0	0	0	0	0	0	0	0	0	0	0	0	0	0	0	0	0	0	0	0	0	0	0
Australia	Jack and horse mackerel, frozen	Exports	Jack and horse mackerel	Frozen	NA	Jack and horse mackerel	Fish	1	13037	0	0	0	0	0	0	0	0	0	0	0	0	0	0	0	0	0	0	0	0	0	0	0	0	0	0	0	0	0	0	0	0	0	0	0	0	0	0	0	1512
Australia	Jack and horse mackerel, frozen	Imports	Jack and horse mackerel	Frozen	NA	Jack and horse mackerel	Fish	1	677.63	0	0	0	0	0	0	0	0	0	0	0	0	0	0	0	0	0	0	0	0	0	0	0	0	0	0	0	0	0	0	0	0	0	0	0	0	62	99	267	74
Australia	Mackerel prepared or preserved, not minced, nei	Exports	Mackerel	Prepared or preserved	NA	Mackerel	Fish	2.66	15990.2	0	0	0	0	0	0	0	0	0	0	0	0	0	18.62	2.66	0	2.66	58.52	66.5	15.96	79.8	47.88	0	45.22	50.54	47.88	13.3	2.66	0	2.66	0	0	55.86	321.86	151.62	207.48	175.56	114.38	45.22	1848.7
Australia	Mackerel prepared or preserved, not minced, nei	Imports	Mackerel	Prepared or preserved	NA	Mackerel	Fish	2.66	105703	641.06	1635.9	2032.24	2093.42	3152.1	3513.86	2117.36	1643.88	1707.72	1638.56	1909.88	1556.1	2141.3	1840.72	2574.88	1625.26	1702.4	1947.12	2287.6	0	2997.82	0	0	0	2816.94	1957.76	2832.9	2548.28	2511.04	2617.44	2721.18	2588.18	3133.48	2963.24	2912.7	3465.98	2827.58	4032.56	3606.96	3511.2
Australia	Mackerels nei, frozen	Exports	Mackerel	Frozen	NA	Mackerel	Fish	1	2320	0	0	0	0	0	0	0	0	0	0	0	0	0	55	0	25	1	8	98	0	8	4	0	1	800	871	149	0	8	18	108	0	19	30	82	0	0	0	1	0
Australia	Mackerels nei, frozen	Imports	Mackerel	Frozen	NA	Mackerel	Fish	1	19506	0	0	0	0	0	0	0	0	0	0	0	0	223	685	1096	1378	2270	1348	2026	832	715	0	0	0	605	495	411	528	239	215	128	310	336	343	360	294	468	666	599	621
Australia	Mackerels, nei, fresh or chilled	Exports	Mackerel	Live, fresh or chilled	NA	Mackerel	Fish	1	1889.34	0	0	0	0	0	0	0	0	0	0	0	0	0	10	0	3	0	11	8	22	32	305	33	16	401	683	87	69	67	35	14	7	0	3	76	0	0	0	1	6
Australia	Mackerels, nei, fresh or chilled	Imports	Mackerel	Live, fresh or chilled	NA	Mackerel	Fish	1	364.5	0	0	0	0	0	0	0	0	0	0	0	0	2	44	0	0	0	1	0	9	13	0	0	0	34	2	34	0	1	2	0	20	5	11	4	1	10	11	41	70
Australia	Marine fish fillets in blocks, nei, frozen	Imports	Marine fish	Frozen	Fillets	Marine fish	Fish	1.25	91177.5	0	0	0	0	0	0	6825	16057.5	17422.5	16748.8	15726.2	12031.2	6366.25	0	0	0	0	0	0	0	0	0	0	0	0	0	0	0	0	0	0	0	0	0	0	0	0	0	0	0
Australia	Marine fish nei, minced, prepared or preserved	Reexports	Marine fish	Prepared or preserved	Minced	Marine fish	Fish	2.66	766.08	0	0	0	0	0	0	0	0	0	0	0	0	0	0	0	0	0	0	0	0	0	744.8	13.3	7.98	0	0	0	0	0	0	0	0	0	0	0	0	0	0	0	0
Australia	Nile perch fillets, frozen	Imports	Nile perch	Frozen	Fillets	Nile perch	Fish	1.25	4546.62	0	0	0	0	0	0	0	0	0	0	0	0	0	0	0	0	0	0	0	0	0	0	0	0	0	0	0	0	0	0	0	0	0	0	0	0	901.25	865	540	475
Australia	Nile perch (Lates niloticus) and snakeheads (Channa spp.), frozen	Imports	Nile perch (Lates niloticus) and snakeheads (Channa spp.)	Frozen	NA	Nile perch and snakeheads (Channa spp.)	Fish	1	348.42	0	0	0	0	0	0	0	0	0	0	0	0	0	0	0	0	0	0	0	0	0	0	0	0	0	0	0	0	0	0	0	0	0	0	0	0	19	14	68	64
Australia	Nile perch and snakeheads (Channa spp.), fresh or chilled	Exports	Nile perch (Lates niloticus) and snakeheads (Channa spp.)	Live, fresh or chilled	NA	Nile perch and snakeheads (Channa spp.)	Fish	1	144.16	0	0	0	0	0	0	0	0	0	0	0	0	0	0	0	0	0	0	0	0	0	0	0	0	0	0	0	0	0	0	0	0	0	0	0	0	0	0	0	0
Australia	Pacific salmons, fresh or chilled	Exports	Pacific salmons	Live, fresh or chilled	NA	Pacific salmons	Fish	1	1273.19	0	0	0	0	0	0	0	0	0	0	0	0	0	0	0	0	0	0	0	0	0	0	0	0	0	0	0	0	0	0	0	0	0	0	0	0	412	202	10	139
Australia	Pacific salmons, fresh or chilled	Imports	Pacific salmons	Live, fresh or chilled	NA	Pacific salmons	Fish	1	3988.09	0	0	0	0	0	0	0	0	0	0	0	0	0	0	0	0	0	0	0	0	0	0	0	0	0	0	0	0	0	0	0	0	0	0	0	0	456	625	406	394
Australia	Pacific salmons, frozen, nei	Exports	Pacific salmons	Frozen	NA	Pacific salmons	Fish	1	1635.98	0	0	0	0	0	0	0	0	0	0	0	0	0	135	485	109	3	92	2	12	50	11	32	19	127	259	14	0	0	56	52	108	30	6	9	11	6	0	1	1
Australia	Pacific salmons, frozen, nei	Imports	Pacific salmons	Frozen	NA	Pacific salmons	Fish	1	1765.05	0	0	0	0	0	0	0	0	0	0	0	0	6	296	2	8	1	4	0	23	21	0	0	0	70	12	254	124	41	157	539	40	18	21	32	12	0	17	18	2
Australia	Miscellaneous pelagic fish nei, prep. or pres., not minced	Imports	Pelagic fish	Prepared or preserved	NA	Pelagic fish	Fish	2.66	795.34	0	0	0	0	0	0	0	0	0	0	0	0	47.88	101.08	47.88	47.88	140.98	388.36	13.3	0	7.98	0	0	0	0	0	0	0	0	0	0	0	0	0	0	0	0	0	0	0
Australia	Pilchards (Sardinops spp.), prep. or pres., not minced, nei	Exports	Pilchards (Sardinops spp.)	Prepared or preserved	NA	Pilchards (Sardinops spp.)	Fish	2.66	2195.94	0	0	0	0	0	0	0	0	0	0	0	0	0	0	0	0	0	0	0	0	0	0	2.66	0	85.12	162.26	111.72	29.26	271.32	143.64	138.32	39.9	202.16	263.34	162.26	119.7	101.08	111.72	135.66	39.9
Australia	Pilchards (Sardinops spp.), prep. or pres., not minced, nei	Imports	Pilchards (Sardinops spp.)	Prepared or preserved	NA	Pilchards (Sardinops spp.)	Fish	2.66	94685.4	8166.2	6205.78	8629.04	6806.94	7370.86	9198.28	7924.14	6471.78	6849.5	8275.26	6783	8022.56	3982.02	0	0	0	0	0	0	0	0	0	0	0	0	0	0	0	0	0	0	0	0	0	0	0	0	0	0	0
Australia	Plaices, frozen, nei	Imports	Plaice	Frozen	NA	Plaice	Fish	1	375	0	0	0	0	0	0	0	0	0	0	0	0	106	74	53	47	17	29	38	0	0	0	0	0	0	0	0	0	0	0	0	6	5	0	0	0	0	0	0	0
Australia	Salmon fillets, fresh or chilled	Imports	Salmon	Live, fresh or chilled	Fillets	Salmon	Fish	1.25	2268.94	0	0	0	0	0	0	0	0	0	0	0	0	0	0	0	0	0	0	0	0	0	0	0	0	0	0	0	0	0	0	0	0	0	0	0	0	106.25	186.25	308.75	317.5
Australia	Salmon fillets, frozen	Exports	Salmon	Frozen	Fillets	Salmon	Fish	1.25	360.288	0	0	0	0	0	0	0	0	0	0	0	0	0	0	0	0	0	0	0	0	0	0	0	0	0	0	0	0	0	0	0	0	0	0	0	0	1.25	38.75	21.25	27.5
Australia	Salmon fillets, frozen	Imports	Salmon	Frozen	Fillets	Salmon	Fish	1.25	23686.5	0	0	0	0	0	0	0	0	0	0	57.5	16.25	0	0	0	0	0	0	0	0	0	0	0	0	0	0	0	0	0	0	0	0	0	0	0	0	691.25	1418.75	2502.5	2996.25
Australia	Salmon minced, prepared or preserved	Imports	Salmon	Prepared or preserved	Minced	Salmon	Fish	2.66	10523	0	0	0	0	0	0	0	0	0	0	0	0	526.68	1441.72	893.76	1186.36	638.4	1061.34	452.2	0	133	0	0	0	0	0	0	0	0	412.3	665	965.58	513.38	425.6	726.18	481.46	0	0	0	0
Australia	Salmon nei prep. or pres., not minced, not in airtight containers	Imports	Salmon	Prepared or preserved	NA	Salmon	Fish	2.66	345.8	0	0	0	0	0	0	0	0	0	0	0	0	0	34.58	7.98	5.32	79.8	154.28	13.3	0	50.54	0	0	0	0	0	0	0	0	0	0	0	0	0	0	0	0	0	0	0
Australia	Salmon nei, not minced, prep.or pres, in airtight containers	Exports	Salmon	Prepared or preserved	NA	Salmon	Fish	2.66	2513.7	715.54	55.86	127.68	122.36	172.9	133	101.08	236.74	109.06	300.58	148.96	53.2	13.3	31.92	13.3	15.96	15.96	53.2	93.1	0	0	0	0	0	0	0	0	0	0	0	0	0	0	0	0	0	0	0	0	0
Australia	Salmon nei, not minced, prep.or pres, in airtight containers	Imports	Salmon	Prepared or preserved	NA	Salmon	Fish	2.66	392135	8722.14	15906.8	17891.2	10679.9	13629.8	19872.9	24916.2	12297.2	22040.8	18761	21992.9	22889.3	15422.7	19529.7	18657.2	16954.8	25900.4	19186.6	16758	23400	26725	0	0	0	0	0	0	0	0	0	0	0	0	0	0	0	0	0	0	0
Australia	Salmon nei, not minced, prepared or preserved	Exports	Salmon	Prepared or preserved	NA	Salmon	Fish	2.66	8398.84	0	0	0	0	0	0	0	0	0	0	0	0	0	0	0	0	0	0	0	101.08	0	50.54	2.66	0	106.4	143.64	95.76	247.38	726.18	1154.44	670.32	859.18	843.22	7.98	7.98	101.08	66.5	465.5	1295.42	571.9
Australia	Salmon nei, not minced, prepared or preserved	Imports	Salmon	Prepared or preserved	NA	Salmon	Fish	2.66	489718	0	0	0	0	0	0	0	0	0	0	0	0	0	0	0	0	0	0	0	0	0	21524.7	21524.7	20897	26389.9	25706.2	19676	19726.6	23139.3	23868.2	25373.7	22280.2	25727.5	19085.5	19590.9	19715.9	20157.5	21577.9	21410.3	21192.2
Australia	Salmons, fresh or chilled, nei	Exports	Salmon	Live, fresh or chilled	NA	Salmon	Fish	1	42780	0	0	0	0	0	0	0	0	0	0	0	0	0	134	618	1276	309	1354	2529	2398	2615	2192	1406	968	755	1069	1269	310	670	1083	396	2435	3602	4926	5179	5287	0	0	0	0
Australia	Salmons, fresh or chilled, nei	Imports	Salmon	Live, fresh or chilled	NA	Salmon	Fish	1	6837	0	0	0	0	0	0	0	0	0	0	0	0	0	0	0	0	0	0	3	0	0	0	0	0	127	446	299	546	472	488	575	760	623	592	1265	641	0	0	0	0
Australia	Salmons, smoked	Exports	Salmon	Smoked	NA	Salmon	Fish	2.5	2747.85	0	0	0	0	0	0	0	0	0	0	0	0	0	90	2.5	12.5	35	30	212.5	137.5	165	152.5	102.5	107.5	252.5	112.5	75	185	27.5	52.5	77.5	140	55	145	50	17.5	82.5	37.5	30	22.5
Australia	Salmons, smoked	Imports	Salmon	Smoked	NA	Salmon	Fish	2.5	91523.8	0	0	0	0	0	0	0	0	0	0	0	0	482.5	962.5	677.5	657.5	370	382.5	537.5	507.5	450	467.5	490	680	757.5	1210	1620	1872.5	2857.5	2925	3380	3680	3847.5	3247.5	3055	3510	4152.5	5775	7447.5	6270
Australia	Salmonoids, fresh or chilled, nei	Exports	Salmonids	Live, fresh or chilled	NA	Salmonids	Fish	1	3794.9	0	0	0	0	0	0	0	0	0	0	0	0	0	111	222	285	159	125	366	421	435	452	228	122	192	250	44	1	4	3	15	28	53	55	63	9	7	21	35	25
Australia	Salmonoids, fresh or chilled, nei	Imports	Salmonids	Live, fresh or chilled	NA	Salmonids	Fish	1	177	0	0	0	0	0	0	0	0	0	0	0	0	0	0	71	2	1	0	14	31	7	0	0	0	31	2	1	1	3	2	3	1	3	2	0	0	1	0	1	0
Australia	Salmonoids, frozen	Exports	Salmonids	Frozen	NA	Salmonids	Fish	1	2492.43	0	0	0	0	0	0	0	0	0	0	0	0	0	76	26	27	23	60	33	260	111	270	468	309	75	14	195	4	0	0	0	48	0	3	0	1	97	13	9	68
Australia	Salmonoids, frozen	Imports	Salmonids	Frozen	NA	Salmonids	Fish	1	1283.56	0	0	0	0	0	0	0	0	0	0	0	0	3	186	27	4	90	345	214	46	17	0	0	0	23	64	16	2	5	24	6	33	1	0	22	37	18	40	13	8
Australia	Sardines, sardinellas, brisling or sprats, fresh or chilled	Exports	Sardine, sardinella, sprat	Live, fresh or chilled	NA	Sardine and sardinella and sprat	Fish	1	274	0	0	0	0	0	0	0	0	0	0	0	0	0	0	0	83	0	3	0	3	0	85	17	44	3	0	0	2	0	0	0	0	15	1	0	0	0	0	18	0
Australia	Sardines, sardinellas, brisling or sprats, fresh or chilled	Imports	Sardine, sardinella, sprat	Live, fresh or chilled	NA	Sardine and sardinella and sprat	Fish	1	3183.92	0	0	0	0	0	0	0	0	0	0	0	0	0	1	5	7	0	0	78	29	0	0	0	0	11	626	410	3	0	5	0	0	0	0	2	0	86	602	734	405
Australia	Sardines, sardinellas, brisling or sprats, frozen	Exports	Sardine, sardinella, sprat	Frozen	NA	Sardine and sardinella and sprat	Fish	1	1716.45	0	0	0	0	0	0	0	0	0	0	0	0	0	146	46	160	57	53	28	19	32	20	76	59	65	56	155	75	61	3	8	13	1	6	16	11	27	15	57	0
Australia	Sardines, sardinellas, brisling or sprats, frozen	Imports	Sardine, sardinella, sprat	Frozen	NA	Sardine and sardinella and sprat	Fish	1	29170.4	0	0	0	0	0	0	0	0	0	0	0	0	61	83	69	434	135	1710	2195	221	219	0	0	0	706	1531	1683	1449	5696	1413	1579	916	504	654	967	866	2811	1624	616	199
Australia	Sardines, sardinellas, brisling or sprats, prep. or pres., not minced, nei	Exports	Sardine, sardinella, sprat	Prepared or preserved	NA	Sardine and sardinella and sprat	Fish	2.66	335.16	0	0	0	0	0	0	0	0	0	0	0	0	0	191.52	21.28	39.9	31.92	23.94	15.96	0	5.32	5.32	0	0	0	0	0	0	0	0	0	0	0	0	0	0	0	0	0	0
Australia	Sardines, sardinellas, brisling or sprats, prep. or pres., not minced, nei	Imports	Sardine, sardinella, sprat	Prepared or preserved	NA	Sardine and sardinella and sprat	Fish	2.66	337765	0	0	0	0	0	0	0	0	0	0	0	0	4756.08	9296.7	10030.9	9573.34	8692.88	8490.72	8352.4	9373.84	8317.82	8586.48	8581.16	9828.7	12978.1	11374.2	11762.5	11938.1	10315.5	11238.5	11783.8	11469.9	11642.8	10570.8	11182.6	11339.6	9748.9	10509.7	11371.5	10709.2
Australia	Sharks nei, fresh or chilled	Imports	Shark	Live, fresh or chilled	NA	Shark	Fish	1	8824.72	0	0	0	0	0	0	0	0	0	0	0	0	0	0	1	0	3	0	0	134	91	0	0	0	426	449	296	274	298	436	390	448	408	553	582	432	489	521	531	494
Australia	Skipjack tuna, fresh or chilled	Exports	Skipjack tuna	Live, fresh or chilled	NA	Skipjack tuna	Fish	1	919	0	0	0	0	0	0	0	0	0	0	0	0	0	0	0	0	900	0	0	0	0	0	0	2	0	0	1	16	0	0	0	0	0	0	0	0	0	0	0	0
Australia	Skipjack tuna, fresh or chilled	Imports	Skipjack tuna	Live, fresh or chilled	NA	Skipjack tuna	Fish	1	2191	0	0	0	0	0	0	0	0	0	0	0	0	0	91	1078	0	0	0	0	0	2	0	0	0	0	0	0	0	1018	0	0	0	1	0	0	0	0	1	0	0
Australia	Skipjack tuna, frozen	Exports	Skipjack tuna	Frozen	NA	Skipjack tuna	Fish	1	1258.13	0	0	0	0	0	0	0	0	0	0	0	0	0	0	0	0	0	800	0	0	0	0	4	72	5	0	12	0	330	0	2	4	14	1	2	0	0	1	1	2
Australia	Skipjack tuna, frozen	Imports	Skipjack tuna	Frozen	NA	Skipjack tuna	Fish	1	48753.2	0	0	0	0	0	0	0	0	0	0	0	0	806	8142	4420	2740	2653	895	6244	4683	5881	0	0	0	481	1163	3063	2328	2729	0	48	22	0	0	0	13	286	222	285	233
Australia	Soles (Solea spp), frozen, nei	Imports	Soles (Solea spp)	Frozen	NA	Soles (Solea spp)	Fish	1	336.4	0	0	0	0	0	0	0	0	0	0	0	0	0	0	0	0	0	0	0	0	0	0	0	0	0	0	0	0	0	0	0	0	0	0	0	0	0	0	0	0
Australia	Southern bluefin tuna(Thunnus maccoyii), fresh or chilled	Exports	Southern bluefin tuna (Thunnus maccoyii)	Live, fresh or chilled	NA	Southern bluefin tuna	Fish	1	28866.8	0	0	0	0	0	0	0	0	0	0	0	0	0	0	0	0	0	0	0	0	0	0	0	0	0	0	2100	3070	2936	2733	2089	1077	1364	3427	1675	767	926	1097	692	902
Australia	Southern bluefin tuna(Thunnus maccoyii), frozen	Exports	Southern bluefin tuna (Thunnus maccoyii)	Frozen	NA	Southern bluefin tuna	Fish	1	119879	0	0	0	0	0	0	0	0	0	0	0	0	0	0	0	0	0	0	0	0	0	0	0	0	0	0	6304	5544	5179	6073	6143	8388	6416	4675	4425	6467	6304	6882	8312	7688
Australia	Swordfish fillets, fresh or chilled	Imports	Swordfish	Live, fresh or chilled	Fillets	Swordfish	Fish	1.25	593.875	0	0	0	0	0	0	0	0	0	0	0	0	0	0	0	0	0	0	0	0	0	0	0	0	0	0	0	0	0	0	0	48.75	36.25	41.25	48.75	53.75	27.5	37.5	45	52.5
Australia	Swordfish fillets, frozen	Imports	Swordfish	Frozen	Fillets	Swordfish	Fish	1.25	382.212	0	0	0	0	0	0	0	0	0	0	0	0	0	0	0	0	0	0	0	0	0	0	0	0	0	0	0	0	0	0	0	23.75	27.5	70	20	25	31.25	17.5	43.75	57.5
Australia	Swordfish meat, frozen	Imports	Swordfish	Frozen	Meat	Swordfish	Fish	1.25	193.375	0	0	0	0	0	0	0	0	0	0	0	0	0	0	0	0	0	0	0	0	0	0	0	0	0	0	0	0	0	0	0	58.75	26.25	23.75	13.75	0	15	1.25	32.5	0
Australia	Swordfish, fresh or chilled	Exports	Swordfish	Live, fresh or chilled	NA	Swordfish	Fish	1	5496.37	0	0	0	0	0	0	0	0	0	0	0	0	0	0	0	0	0	0	0	0	0	0	0	0	0	0	0	0	0	0	0	221	364	426	482	375	510	365	518	492
Australia	Swordfish, fresh or chilled	Imports	Swordfish	Live, fresh or chilled	NA	Swordfish	Fish	1	1119.02	0	0	0	0	0	0	0	0	0	0	0	0	0	0	0	0	0	0	0	0	0	0	0	0	0	0	0	0	0	0	0	59	69	82	129	136	121	128	97	84
Australia	Tilapia fillets, fresh or chilled	Imports	Tilapia	Live, fresh or chilled	Fillets	Tilapia	Fish	1.25	376.938	0	0	0	0	0	0	0	0	0	0	0	0	0	0	0	0	0	0	0	0	0	0	0	0	0	0	0	0	0	0	0	0	0	0	0	0	65	37.5	35	32.5
Australia	Tilapia fillets, frozen	Imports	Tilapia	Frozen	Fillets	Tilapia	Fish	1.25	744.925	0	0	0	0	0	0	0	0	0	0	0	0	0	0	0	0	0	0	0	0	0	0	0	0	0	0	0	0	0	0	0	0	0	0	0	0	97.5	46.25	57.5	81.25
Australia	Tilapias, frozen	Imports	Tilapia	Frozen	NA	Tilapia	Fish	1	8605.7	0	0	0	0	0	0	0	0	0	0	0	0	0	0	0	0	0	0	0	0	0	0	0	0	0	0	0	0	0	0	0	0	0	0	0	0	787	1069	1138	1094
Australia	Meat of tilapias, catfish, carp, eels, nile perch and snakeheads, fresh or chilled	Imports	Tilapias, catfish, carp, eels, Nile perch and snakeheads	Live, fresh or chilled	Meat	Tilapia and catfish and carp	Fish	1.25	135.762	0	0	0	0	0	0	0	0	0	0	0	0	0	0	0	0	0	0	0	0	0	0	0	0	0	0	0	0	0	0	0	0	0	0	0	0	0	0	0	5
Australia	Tilapias, catfish, carp, eels, Nile perch and snakeheads meat, frozen	Imports	Tilapias, catfish, carp, eels, Nile perch and snakeheads	Frozen	Meat	Tilapia and catfish and carp	Fish	1.25	2078.9	0	0	0	0	0	0	0	0	0	0	0	0	0	0	0	0	0	0	0	0	0	0	0	0	0	0	0	0	0	0	0	0	0	0	0	0	117.5	155	145	82.5
Australia	Tilapias, catfish, carp, eels, Nile perch and snakeheads, including fillets, smoked	Imports	Tilapias, catfish, carp, eels, Nile perch and snakeheads	Smoked	Fillets	Tilapia and catfish and carp	Fish	2.5	431.575	0	0	0	0	0	0	0	0	0	0	0	0	0	0	0	0	0	0	0	0	0	0	0	0	0	0	0	0	0	0	0	0	0	0	0	0	7.5	65	35	40
Australia	Toothfish (Dissostichus spp.), fillets, frozen	Exports	Toothfish (Dissostichus spp.)	Frozen	Fillets	Toothfish (Dissostichus spp.)	Fish	1.25	1356.19	0	0	0	0	0	0	0	0	0	0	0	0	0	0	0	0	0	0	0	0	0	0	0	0	462.5	357.5	0	115	0	0	0	0	0	0	0	0	0	0	17.5	47.5
Australia	Toothfish (Dissostichus spp.), fillets, frozen	Imports	Toothfish (Dissostichus spp.)	Frozen	Fillets	Toothfish (Dissostichus spp.)	Fish	1.25	296.875	0	0	0	0	0	0	0	0	0	0	0	0	0	0	0	0	0	0	0	0	0	0	0	0	0	0	0	0	0	0	0	26.25	31.25	0	0	2.5	5	175	0	11.25
Australia	Toothfish (Dissostichus spp.), frozen	Exports	Toothfish (Dissostichus spp.)	Frozen	NA	Toothfish (Dissostichus spp.)	Fish	1	5445.44	0	0	0	0	0	0	0	0	0	0	0	0	0	0	0	0	0	0	0	0	0	0	0	0	2457	1427	0	301	0	0	0	0	0	0	0	0	0	0	0	92
Australia	Toothfish (Dissostichus spp.), frozen	Imports	Toothfish (Dissostichus spp.)	Frozen	NA	Toothfish (Dissostichus spp.)	Fish	1	1790.27	0	0	0	0	0	0	0	0	0	0	0	0	0	0	0	0	0	0	0	0	0	0	0	0	0	0	0	0	0	26	3	80	34	69	83	67	133	100	148	197
Australia	Toothfish (Dissostichus spp.), meat, frozen	Exports	Toothfish (Dissostichus spp.)	Frozen	Meat	Toothfish (Dissostichus spp.)	Fish	1.25	1214.19	0	0	0	0	0	0	0	0	0	0	0	0	0	0	0	0	0	0	0	0	0	0	0	0	0	0	0	0	0	0	0	0	0	713.75	0	110	1.25	0	0	236.25
Australia	Trout fillets, frozen	Imports	Trout	Frozen	Fillets	Trout	Fish	1.25	3042.5	0	0	0	0	0	0	0	0	0	0	37.5	8.75	351.25	11.25	0	10	113.75	36.25	23.75	28.75	1.25	0	0	0	0	0	0	0	0	0	0	0	0	0	0	0	87.5	96.25	398.75	281.25
Australia	Trouts and chars live	Exports	Trouts and chars	Live, fresh or chilled	NA	Trout and char	Fish	1	13389.8	0	0	0	0	0	0	0	0	0	0	0	0	0	0	0	0	0	0	170	583	883	1028	754	1715	1065	1261	822	575	386	130	131	242	274	288	219	166	386	456	378	352
Australia	Trouts and chars, fresh or chilled	Exports	Trouts and chars	Live, fresh or chilled	NA	Trout and char	Fish	1	2668.23	0	0	0	0	0	0	0	0	0	0	0	0	0	1	0	13	27	60	20	50	33	6	1	7	36	49	189	42	61	81	114	102	141	250	127	183	112	132	178	272
Australia	Trouts and chars, fresh or chilled	Imports	Trouts and chars	Live, fresh or chilled	NA	Trout and char	Fish	1	452.74	0	0	0	0	0	0	0	0	0	0	0	0	0	0	0	0	0	0	0	2	0	0	0	0	0	0	1	8	7	0	0	3	0	0	0	0	2	6	2	2
Australia	Trouts and chars, frozen	Exports	Trouts and chars	Frozen	NA	Trout and char	Fish	1	2072.65	0	0	0	0	0	0	0	0	0	0	0	0	0	33	3	6	13	136	127	121	167	274	146	144	173	67	58	54	20	9	24	46	45	61	78	66	44	42	15	18
Australia	Trouts and chars, frozen	Imports	Trouts and chars	Frozen	NA	Trout and char	Fish	1	346.67	0	0	0	0	0	0	0	0	0	0	0	0	0	2	0	37	0	1	17	4	3	0	0	0	0	0	5	9	77	22	1	3	21	0	0	0	0	5	20	22
Australia	Trouts and chars, smoked	Imports	Trouts and chars	Smoked	NA	Trout and char	Fish	2.5	10801.2	0	0	0	0	0	0	0	0	0	0	0	0	0	0	0	0	0	0	0	0	0	0	0	0	0	0	0	0	0	0	0	0	0	0	0	0	555	1490	1745	1690
Australia	Tuna loins and fillets, frozen	Imports	Tuna	Frozen	Loins	Tuna	Fish	1.25	3078.82	0	0	0	0	0	0	0	0	0	0	0	0	0	0	0	0	0	0	0	0	0	0	0	0	0	0	0	0	0	0	0	0	0	0	0	0	126.25	193.75	482.5	216.25
Australia	Tuna meat, whether or not minced, frozen	Exports	Tuna	Frozen	Meat	Tuna	Fish	1.25	10250	0	0	0	0	0	0	0	0	0	0	0	0	0	7.5	21.25	632.5	311.25	956.25	2143.75	0	2156.25	0	0	0	3446.25	312.5	0	17.5	30	5	210	0	0	0	0	0	0	0	0	0
Australia	Tunas nei, frozen	Exports	Tuna	Frozen	NA	Tuna	Fish	1	74348.2	626	4535	1771	1858	6038	4050	9659	12107	5146	3525	2326	3802	1600	1239	854	220	24	112	18	4	2	572	1637	3855	3375	5086	86	22	3	7	2	15	33	28	44	35	0	3	19	4
Australia	Tunas nei, frozen	Imports	Tuna	Frozen	NA	Tuna	Fish	1	23188.4	0	0	0	0	0	0	0	0	0	0	0	0	1142	241	24	54	2	5	0	11	11	8320	6609	6458	46	15	2	8	5	5	25	4	0	0	3	8	0	14	32	30
Australia	Tunas prepared or preserved, not minced, in airtight containers	Exports	Tuna	Prepared or preserved	NA	Tuna	Fish	2.66	9759.54	864.5	194.18	69.16	55.86	196.84	130.34	2441.88	3489.92	45.22	18.62	218.12	122.36	505.4	345.8	534.66	66.5	90.44	85.12	50.54	0	234.08	0	0	0	0	0	0	0	0	0	0	0	0	0	0	0	0	0	0	0
Australia	Tunas prepared or preserved, not minced, in airtight containers	Imports	Tuna	Prepared or preserved	NA	Tuna	Fish	2.66	1.91307e+06	566.58	1742.3	4067.14	4043.2	7796.46	6189.82	3138.8	3753.26	6969.2	7043.68	6676.6	9413.74	11148.1	18516.3	17439	19692	20354.3	23312.2	27930	28323.7	28858.3	0	0	0	0	0	0	0	0	83345.8	84933.8	87375.7	107858	88870.6	111332	116503	119636	124331	127417	125483
Australia	Tunas prepared or preserved, not minced, nei	Exports	Tuna	Prepared or preserved	NA	Tuna	Fish	2.66	37199.6	0	0	0	0	0	0	0	0	0	0	0	0	0	0	0	0	2.66	0	0	47.88	0	348.46	678.3	835.24	1239.56	731.5	340.48	553.28	952.28	1654.52	960.26	622.44	1314.04	500.08	649.04	425.6	659.68	2769.06	5833.38	3487.26
Australia	Tunas prepared or preserved, not minced, nei	Imports	Tuna	Prepared or preserved	NA	Tuna	Fish	2.66	486533	0	0	0	0	0	0	0	0	0	0	0	0	0	0	0	0	0	0	0	0	0	29504.7	30140.5	38447.6	44746.5	52048.2	63334.6	84093.2	144217	0	0	0	0	0	0	0	0	0	0	0
Australia	Tunas prepared or preserved, not minced, not in airtight containers	Imports	Tuna	Prepared or preserved	NA	Tuna	Fish	2.66	39970.9	0	0	0	0	0	0	0	0	0	0	0	0	2.66	127.68	82.46	0	103.74	542.64	3458	0	2516.36	0	0	0	0	0	0	0	0	3960.74	6232.38	6610.1	2721.18	6495.72	55.86	66.5	399	776.72	808.64	646.38
Australia	Tunas, fresh or chilled, nei	Exports	Tuna	Live, fresh or chilled	NA	Tuna	Fish	1	28637.5	0	0	0	0	0	0	0	0	0	0	0	0	0	295	1709	722	940	357	1059	1576	1798	3277	4112	2549	3291	5119	627	178	61	22	69	169	167	153	99	111	3	3	6	15
Australia	Tunas, fresh or chilled, nei	Imports	Tuna	Live, fresh or chilled	NA	Tuna	Fish	1	1191.44	0	0	0	0	0	0	0	0	0	0	0	0	0	0	9	3	2	3	3	97	95	137	188	215	21	11	7	262	54	18	10	15	6	1	16	1	0	0	0	0
Australia	Tunas, bonitos, billfishes, nei, minced, prepared or preserved	Exports	Tunas, bonitos, billfishes	Prepared or preserved	Minced	Tuna and bonito and billfish	Fish	2.66	273.98	0	0	0	0	0	0	0	0	0	0	0	0	0	0	5.32	2.66	0	21.28	95.76	0	148.96	0	0	0	0	0	0	0	0	0	0	0	0	0	0	0	0	0	0	0
Australia	Tunas, bonitos, billfishes, nei, minced, prepared or preserved	Imports	Tunas, bonitos, billfishes	Prepared or preserved	Minced	Tuna and bonito and billfish	Fish	2.66	7910.84	0	0	0	0	0	0	0	0	0	0	0	0	98.42	162.26	502.74	978.88	1106.56	585.2	1197	0	819.28	0	0	0	0	0	0	0	0	688.94	428.26	276.64	194.18	119.7	319.2	433.58	0	0	0	0
Australia	Whiting, frozen	Exports	Whiting (Merlangius merlangus)	Frozen	NA	Whiting	Fish	1	43847	544	761	527	465	725	777	1499	1253	1091	1042	1347	2033	1600	1256	1778	3156	1103	1604	2847	0	2200	0	0	0	1006	1360	0	1120	1824	1950	1890	1642	1110	1478	1490	1369	0	0	0	0
Australia	Yellowfin tuna, fresh or chilled	Exports	Yellowfin tuna	Live, fresh or chilled	NA	Yellowfin tuna	Fish	1	34202.9	0	0	0	0	0	0	0	0	0	0	0	0	0	198	238	271	206	253	635	711	720	1607	2617	3042	3573	3877	2787	2408	1361	676	1956	311	523	416	528	815	290	281	468	854
Australia	Yellowfin tuna, fresh or chilled	Imports	Yellowfin tuna	Live, fresh or chilled	NA	Yellowfin tuna	Fish	1	2896.28	0	0	0	0	0	0	0	0	0	0	0	0	0	0	424	2	2	1	1	36	70	0	0	0	57	110	132	93	188	144	222	179	84	145	106	59	127	118	106	68
Australia	Yellowfin tuna, frozen, nei	Exports	Yellowfin tuna	Frozen	NA	Yellowfin tuna	Fish	1	2067.99	0	0	0	0	0	0	0	0	0	0	0	0	0	316	295	3	190	91	114	133	215	6	40	155	130	189	23	31	16	0	3	7	1	23	14	17	0	0	7	7
Australia	Yellowfin tuna, frozen, nei	Imports	Yellowfin tuna	Frozen	NA	Yellowfin tuna	Fish	1	13467	0	0	0	0	0	0	0	0	0	0	0	0	10	1227	2531	372	587	2476	1089	2010	962	0	0	0	29	1683	200	63	95	7	3	1	5	11	0	0	8	29	40	7
Austria	Alaska pollock fillets, frozen	Exports	Alaska pollock	Frozen	Fillets	Alaska pollock	Fish	1.25	679.7	0	0	0	0	0	0	0	0	0	0	0	0	0	0	0	0	0	0	0	0	0	0	0	0	0	0	0	0	0	20	10	0	16.25	13.75	36.25	156.25	363.75	22.5	6.25	10
Austria	Alaska pollock fillets, frozen	Imports	Alaska pollock	Frozen	Fillets	Alaska pollock	Fish	1.25	50058.8	0	0	0	0	0	0	0	0	0	0	0	0	0	0	0	0	0	0	0	1470	2732.5	2172.5	2336.25	1881.25	1178.75	1948.75	1950	1847.5	2272.5	1747.5	2850	2681.25	2416.25	2468.75	3011.25	3366.25	2432.5	1681.25	1285	1092.5
Austria	Alaska pollock, fresh or chilled	Imports	Alaska pollock	Live, fresh or chilled	NA	Alaska pollock	Fish	1	138.8	0	0	0	0	0	0	0	0	0	0	0	0	0	0	0	0	0	0	0	0	0	0	0	0	0	0	0	0	0	0	16	31	26	16	0	2	0	8	6	9
Austria	Alaska pollock, frozen	Imports	Alaska pollock	Frozen	NA	Alaska pollock	Fish	1	3573.75	0	0	0	0	0	0	0	0	0	0	0	0	0	0	0	0	0	0	0	0	0	0	0	1	2	0	0	0	0	0	4	13	2	0	1	0	317	459	538	387
Austria	Alaska pollock, meat, whether or not minced, frozen	Imports	Alaska pollock	Frozen	Meat	Alaska pollock	Fish	1.25	1921.64	0	0	0	0	0	0	0	0	0	0	0	0	0	0	0	0	0	0	0	56.25	28.75	42.5	52.5	78.75	88.75	107.5	143.75	103.75	125	161.25	148.75	177.5	232.5	161.25	107.5	30	26.25	8.75	11.25	6.25
Austria	Alaska pollock, not minced, prepared or preserved	Exports	Alaska pollock	Prepared or preserved	NA	Alaska pollock	Fish	2.66	1317.18	0	0	0	0	0	0	0	0	0	0	0	0	0	0	0	0	0	0	0	0	0	5.32	7.98	0	0	0	2.66	7.98	13.3	0	39.9	220.78	63.84	98.42	69.16	61.18	79.8	71.82	87.78	186.2
Austria	Alaska pollock, not minced, prepared or preserved	Imports	Alaska pollock	Prepared or preserved	NA	Alaska pollock	Fish	2.66	84850.5	0	0	0	0	0	0	0	0	0	0	0	0	0	0	0	0	0	0	0	848.54	1029.42	1077.3	1170.4	1077.3	811.3	978.88	867.16	787.36	808.64	758.1	2715.86	3926.16	4104.38	3027.08	3434.06	3668.14	5083.26	6578.18	5961.06	6376.02
Austria	Albacore (=Longfin tuna), fresh or chilled	Imports	Albacore	Live, fresh or chilled	NA	Albacore	Fish	1	352.5	0	0	0	0	0	0	0	0	0	0	0	0	1	1	0	1	2	1	0	0	0	2	1	0	0	3	35	24	25	59	23	27	13	21	29	9	17	14	4	4
Austria	Anchovies (Engraulis spp), fresh or chilled	Imports	Anchovies (Engraulis spp)	Live, fresh or chilled	NA	Anchovies (Engraulis spp)	Fish	1	309.07	0	0	0	0	0	0	0	0	0	0	0	0	0	0	0	0	0	0	0	2	1	19	1	4	3	5	8	5	5	17	4	3	3	9	29	28	13	10	19	21
Austria	Anchovies minced, prepared or preserved	Exports	Anchovy	Prepared or preserved	Minced	Anchovy	Fish	2.66	929.537	0	0	0	0	0	0	0	0	0	0	0	0	0	0	0	0	0	0	0	0	0	15.96	138.32	111.72	90.44	77.14	66.5	69.16	74.48	63.84	74.48	63.84	29.26	2.66	7.98	13.3	7.98	2.66	2.66	2.66
Austria	Anchovies minced, prepared or preserved	Imports	Anchovy	Prepared or preserved	Minced	Anchovy	Fish	2.66	1717.93	0	0	0	0	0	0	0	0	0	0	0	0	0	0	0	0	0	0	0	2.66	0	18.62	7.98	37.24	53.2	85.12	42.56	15.96	23.94	37.24	47.88	170.24	164.92	101.08	103.74	111.72	74.48	106.4	87.78	101.08
Austria	Anchovies nei, dried, whether or not salted, but not smoked	Imports	Anchovy	Dried	NA	Anchovy	Fish	2.82	717.013	0	0	0	0	0	0	0	0	0	0	0	0	0	0	0	0	0	0	0	0	0	56.4	0	0	64.86	0	132.54	64.86	267.9	2.82	2.82	19.74	5.64	0	2.82	0	31.02	2.82	8.46	14.1
Austria	Anchovies, frozen	Exports	Anchovy	Frozen	NA	Anchovy	Fish	1	4343.51	0	0	0	0	0	0	0	0	0	0	0	0	0	0	0	0	0	0	0	0	0	0	0	0	0	0	50	63	203	95	345	385	535	324	535	361	168	364	277	272
Austria	Anchovies, frozen	Imports	Anchovy	Frozen	NA	Anchovy	Fish	1	5004.99	0	0	0	0	0	0	0	0	0	0	0	0	0	0	0	0	0	0	0	79	11	21	7	10	2	26	57	70	214	104	449	401	580	354	622	392	194	404	307	292
Austria	Anchovies, prepared or preserved, not minced	Exports	Anchovy	Prepared or preserved	NA	Anchovy	Fish	2.66	2036.87	0	0	0	0	0	0	0	0	0	0	0	0	31.92	7.98	5.32	15.96	18.62	2.66	10.64	5.32	2.66	15.96	2.66	0	0	0	2.66	26.6	2.66	0	18.62	172.9	114.38	119.7	196.84	125.02	87.78	135.66	242.06	143.64
Austria	Anchovies, prepared or preserved, not minced	Imports	Anchovy	Prepared or preserved	NA	Anchovy	Fish	2.66	24223.4	0	0	0	0	0	0	0	0	0	0	0	0	202.16	85.12	194.18	593.18	414.96	513.38	537.32	508.06	630.42	641.06	449.54	500.08	500.08	500.08	524.02	694.26	680.96	1274.14	1268.82	1433.74	1792.84	1287.44	1439.06	1191.68	941.64	954.94	782.04	968.24
Austria	Anchovies, salted or in brine	Imports	Anchovy	Salted	NA	Anchovy	Fish	2.82	1836.58	0	0	0	0	0	0	0	0	0	0	0	0	0	0	0	0	0	0	0	56.4	174.84	194.58	276.36	242.52	129.72	186.12	132.54	135.36	5.64	0	0	0	0	2.82	81.78	70.5	50.76	64.86	5.64	5.64
Austria	Angler (=Monk) fillets, frozen	Imports	Angler (=Monk)	Frozen	Fillets	Angler	Fish	1.25	684.587	0	0	0	0	0	0	0	0	0	0	0	0	0	0	0	0	0	0	0	37.5	40	40	32.5	22.5	28.75	40	25	25	35	41.25	32.5	37.5	41.25	28.75	30	30	22.5	17.5	11.25	13.75
Austria	Angler (=monk), fresh or chilled	Imports	Angler (=Monk)	Live, fresh or chilled	NA	Angler	Fish	1	2562.6	0	0	0	0	0	0	0	0	0	0	0	0	0	0	0	0	0	0	0	76	71	73	78	67	61	65	39	57	77	108	113	133	63	76	160	276	210	182	144	119
Austria	Argentinian hake fillets, frozen	Imports	Argentine hake	Frozen	Fillets	Argentine hake	Fish	1.25	492.087	0	0	0	0	0	0	0	0	0	0	0	0	0	0	0	0	0	0	0	0	0	2.5	33.75	120	35	3.75	23.75	25	6.25	3.75	10	11.25	5	8.75	10	5	22.5	23.75	21.25	16.25
Austria	Atlantic(Thunnus thynnus)and Pacific(Thunnus orientalis)bluefin tuna, fresh or chilled	Imports	Atlantic (Thunnus thynnus)and Pacific (Thunnus orientalis) bluefin tuna	Live, fresh or chilled	NA	Atlantic and Pacific bluefin tuna	Fish	1	392.43	0	0	0	0	0	0	0	0	0	0	0	0	0	0	0	0	0	0	0	4	0	2	0	0	0	0	17	23	34	42	14	7	0	0	0	0	30	31	30	29
Austria	Atlantic(Thunnus thynnus)and Pacific(Thunnus orientalis)bluefin tuna, frozen	Imports	Atlantic (Thunnus thynnus)and Pacific (Thunnus orientalis) bluefin tuna	Frozen	NA	Atlantic and Pacific bluefin tuna	Fish	1	112.8	0	0	0	0	0	0	0	0	0	0	0	0	0	0	0	0	0	0	0	0	0	0	0	0	0	0	0	0	0	0	0	0	0	0	0	0	51	51	0	0
Austria	Atlantic cod, fresh or chilled	Imports	Atlantic cod	Live, fresh or chilled	NA	Atlantic cod	Fish	1	1068.65	0	0	0	0	0	0	0	0	0	0	0	0	0	0	0	0	0	0	0	7	9	9	47	418	19	34	7	6	11	5	8	7	5	6	15	20	10	47	55	41
Austria	Atlantic cod, frozen	Imports	Atlantic cod	Frozen	NA	Atlantic cod	Fish	1	1314.95	0	0	0	0	0	0	0	0	0	0	0	0	0	0	0	0	0	0	0	1	0	0	0	0	0	0	4	4	3	5	7	3	2	26	37	126	119	133	140	142
Austria	Atlantic halibut, fresh or chilled	Imports	Atlantic halibut	Live, fresh or chilled	NA	Atlantic halibut	Fish	1	561.38	0	0	0	0	0	0	0	0	0	0	0	0	0	0	0	0	0	0	0	6	0	3	0	1	1	3	3	4	7	5	1	56	24	39	58	66	60	50	61	61
Austria	Atlantic halibut, smoked	Imports	Atlantic halibut	Smoked	NA	Atlantic halibut	Fish	2.5	1078.75	0	0	0	0	0	0	0	0	0	0	0	0	0	0	0	0	0	0	0	5	12.5	270	142.5	125	105	155	17.5	17.5	20	12.5	12.5	25	12.5	10	15	25	15	20	17.5	15
Austria	Atlantic herring, fresh or chilled	Imports	Atlantic herring	Live, fresh or chilled	NA	Atlantic herring	Fish	1	542	0	0	0	0	0	0	0	0	0	0	0	0	0	0	0	0	0	0	0	542	0	0	0	0	0	0	0	0	0	0	0	0	0	0	0	0	0	0	0	0
Austria	Atlantic mackerel, frozen	Imports	Atlantic mackerel	Frozen	NA	Atlantic mackerel	Fish	1	395	0	0	0	0	0	0	0	0	0	0	0	0	0	0	0	0	0	0	0	395	0	0	0	0	0	0	0	0	0	0	0	0	0	0	0	0	0	0	0	0
Austria	Atlantic redfishes, fillets, frozen	Imports	Atlantic redfish	Frozen	Fillets	Atlantic redfish	Fish	1.25	2324.46	0	0	0	0	0	0	0	0	0	0	0	0	0	0	0	0	0	0	0	40	63.75	73.75	85	167.5	115	101.25	86.25	121.25	153.75	112.5	81.25	68.75	76.25	111.25	142.5	96.25	66.25	63.75	85	83.75
Austria	Atlantic redfishes, fresh or chilled	Imports	Atlantic redfish	Live, fresh or chilled	NA	Atlantic redfish	Fish	1	475.61	0	0	0	0	0	0	0	0	0	0	0	0	0	0	0	0	0	0	0	0	1	2	1	2	4	15	4	10	8	5	4	3	2	7	10	20	8	15	82	91
Austria	Atlantic redfishes, frozen	Exports	Atlantic redfish	Frozen	NA	Atlantic redfish	Fish	1	107.01	0	0	0	0	0	0	0	0	0	0	0	0	0	0	0	0	0	0	0	0	0	0	0	11	0	0	96	0	0	0	0	0	0	0	0	0	0	0	0	0
Austria	Atlantic redfishes, frozen	Imports	Atlantic redfish	Frozen	NA	Atlantic redfish	Fish	1	150.35	0	0	0	0	0	0	0	0	0	0	0	0	0	0	0	0	0	0	0	6	6	2	1	0	0	0	96	0	4	5	3	1	1	7	5	3	3	0	0	0
Austria	Atlantic and Danube salmons, fresh or chilled	Exports	Atlantic salmon and Danube salmon	Live, fresh or chilled	NA	Atlantic salmon and Danube salmon	Fish	1	2034.79	0	0	0	0	0	0	0	0	0	0	0	0	0	0	0	0	0	0	0	0	0	0	0	0	0	0	0	0	0	0	0	0	0	0	0	0	184	201	309	301
Austria	Atlantic and Danube salmons, fresh or chilled	Imports	Atlantic salmon and Danube salmon	Live, fresh or chilled	NA	Atlantic salmon and Danube salmon	Fish	1	18352.6	0	0	0	0	0	0	0	0	0	0	0	0	0	0	0	0	0	0	0	0	0	0	0	0	0	0	0	0	0	0	0	0	0	0	0	0	1931	2082	2586	2788
Austria	Atlantic salmon and Danube salmon, frozen	Imports	Atlantic salmon and Danube salmon	Frozen	NA	Atlantic salmon and Danube salmon	Fish	1	2959.19	0	0	0	0	0	0	0	0	0	0	0	0	10	11	18	21	2	22	2	68	57	46	264	200	86	28	32	33	68	48	55	408	142	115	131	167	133	135	128	106
Austria	Blue mackerel, frozen	Imports	Blue mackerel	Frozen	NA	Blue mackerel	Fish	1	264.3	0	0	0	0	0	0	0	0	0	0	0	0	0	0	0	0	0	0	0	5	12	2	3	3	40	11	21	26	0	0	2	0	3	44	2	0	3	6	23	10
Austria	Brisling or sprats, frozen	Imports	Brisling or sprats	Frozen	NA	Brisling or sprats	Fish	1	186.17	0	0	0	0	0	0	0	0	0	0	0	0	0	0	0	0	0	0	0	34	8	6	12	13	10	12	25	7	39	7	4	0	1	0	0	1	1	1	2	1
Austria	Cape hake fillets, frozen	Imports	Cape hake	Frozen	Fillets	Cape hake	Fish	1.25	1718.1	0	0	0	0	0	0	0	0	0	0	0	0	0	0	0	0	0	0	0	0	0	0	6.25	0	2.5	25	20	36.25	13.75	30	10	10	7.5	23.75	63.75	121.25	110	211.25	161.25	165
Austria	Cape hake, fresh or chilled	Imports	Cape hake	Live, fresh or chilled	NA	Cape hake	Fish	1	111.35	0	0	0	0	0	0	0	0	0	0	0	0	0	0	0	0	0	0	0	0	0	0	0	0	0	0	0	3	3	3	2	4	4	6	21	23	10	14	10	4
Austria	Cape hake, frozen	Imports	Cape hake	Frozen	NA	Cape hake	Fish	1	261.94	0	0	0	0	0	0	0	0	0	0	0	0	0	0	0	0	0	0	0	0	0	0	0	0	0	0	1	1	0	1	1	1	1	0	4	7	13	21	33	43
Austria	Carp fillets, fresh or chilled	Imports	Carps	Live, fresh or chilled	Fillets	Carps	Fish	1.25	176.25	0	0	0	0	0	0	0	0	0	0	0	0	0	0	2.5	26.25	50	52.5	45	0	0	0	0	0	0	0	0	0	0	0	0	0	0	0	0	0	0	0	0	0
Austria	Carps live	Exports	Carps	Live, fresh or chilled	NA	Carps	Fish	1	4055	12	8	5	0	8	0	0	0	2	0	1	0	2	0	0	0	0	0	0	6	69	349	680	550	649	559	627	408	118	0	0	0	0	0	0	0	0	1	1	0
Austria	Carps live	Imports	Carps	Live, fresh or chilled	NA	Carps	Fish	1	27123.5	671	529	517	776	723	694	615	609	542	558	541	539	527	425	432	520	502	494	578	448	813	1055	1489	1344	1552	1441	1522	1286	757	489	483	536	352	353	357	291	256	275	264	223
Austria	Carps, fresh or chilled	Imports	Carps	Live, fresh or chilled	NA	Carps	Fish	1	1096.89	0	0	0	0	0	0	0	0	0	0	0	0	8	15	9	8	14	37	27	10	27	59	62	73	42	27	32	42	0	7	11	8	12	0	53	48	156	35	38	48
Austria	Carps, frozen	Exports	Carps	Frozen	NA	Carps	Fish	1	300.03	0	0	0	0	0	0	0	0	0	0	0	0	0	0	0	0	0	0	0	0	0	0	0	0	0	0	0	5	5	0	0	0	0	0	0	0	0	0	0	0
Austria	Carps, frozen	Imports	Carps	Frozen	NA	Carps	Fish	1	414.66	0	0	0	0	0	0	0	0	0	0	0	0	0	0	0	3	2	3	0	0	0	0	0	0	0	1	0	6	6	2	12	1	1	24	0	16	1	1	1	1
Austria	Carps, eels and snakeheads, fillets, fresh or chilled	Exports	Carps, eels and snakeheads	Live, fresh or chilled	Fillets	Carps and eels and snakeheads	Fish	1.25	253.613	0	0	0	0	0	0	0	0	0	0	0	0	0	0	0	0	0	0	0	0	0	0	0	0	0	0	0	0	0	0	0	0	0	0	0	0	47.5	50	33.75	35
Austria	Carps, eels and snakeheads, fillets, fresh or chilled	Imports	Carps, eels and snakeheads	Live, fresh or chilled	Fillets	Carps and eels and snakeheads	Fish	1.25	1576.88	0	0	0	0	0	0	0	0	0	0	0	0	0	0	0	0	0	0	0	0	0	0	0	0	0	0	0	0	0	0	0	0	0	0	0	0	356.25	257.5	375	365
Austria	Carps, eels and snakeheads, fillets, frozen	Imports	Carps, eels and snakeheads	Frozen	Fillets	Carps and eels and snakeheads	Fish	1.25	343.613	0	0	0	0	0	0	0	0	0	0	0	0	0	0	0	0	0	0	0	0	0	0	0	0	0	0	0	0	0	0	0	0	0	0	0	0	121.25	3.75	0	1.25
Austria	Catfish fillets, fresh or chilled	Exports	Catfish	Live, fresh or chilled	Fillets	Catfish	Fish	1.25	320.038	0	0	0	0	0	0	0	0	0	0	0	0	0	0	0	0	0	0	0	0	0	0	0	0	0	0	0	0	0	0	0	0	0	0	1.25	1.25	28.75	41.25	26.25	47.5
Austria	Catfish fillets, fresh or chilled	Imports	Catfish	Live, fresh or chilled	Fillets	Catfish	Fish	1.25	3729.88	0	0	0	0	0	0	0	0	0	0	0	0	0	0	0	0	0	0	0	0	0	0	0	0	0	0	0	0	0	0	0	0	0	0	268.75	397.5	512.5	562.5	252.5	437.5
Austria	Catfish fillets, frozen	Exports	Catfish	Frozen	Fillets	Catfish	Fish	1.25	508.2	0	0	0	0	0	0	0	0	0	0	0	0	0	0	0	0	0	0	0	0	0	0	0	0	0	0	0	0	0	0	0	0	0	0	35	51.25	51.25	48.75	50	68.75
Austria	Catfish fillets, frozen	Imports	Catfish	Frozen	Fillets	Catfish	Fish	1.25	17006.6	0	0	0	0	0	0	0	0	0	0	0	0	0	0	0	0	0	0	0	0	0	0	0	0	0	0	0	0	0	0	0	0	0	0	2516.25	2642.5	1676.25	1615	1527.5	1330
Austria	Catfish, fresh or chilled	Imports	Catfish	Live, fresh or chilled	NA	Catfish	Fish	1	503.32	0	0	0	0	0	0	0	0	0	0	0	0	0	0	0	0	0	0	0	0	0	0	0	0	0	0	0	0	0	0	0	0	0	0	0	0	169	92	71	49
Austria	Catfish, frozen	Imports	Catfish	Frozen	NA	Catfish	Fish	1	541.92	0	0	0	0	0	0	0	0	0	0	0	0	0	0	0	0	0	0	0	0	0	0	0	0	0	0	0	0	0	0	0	0	0	0	0	0	19	162	176	33
Austria	Cuttle fish "Sepia officinalis" and "Rossia macrosoma", with or without shell, frozen	Imports	Cuttlefish	Frozen	NA	Cephalopod	Cephalopod	1	185.74	0	0	0	0	0	0	0	0	0	0	0	0	0	0	0	0	0	0	0	0	0	0	0	0	0	0	0	0	0	0	0	0	0	0	0	0	0	0	0	0
Austria	Cuttle fish "Sepia officinalis, Rossia macrosoma, Sepiola spp.", smoked, dried, salted/in brine, with or without shell	Imports	Cuttlefish	Dried	NA	Cephalopod	Cephalopod	2.82	559.714	0	0	0	0	0	0	0	0	0	0	0	0	0	0	0	0	0	0	0	0	0	0	0	0	0	0	0	0	0	0	0	0	0	0	0	0	0	0	0	0
Austria	Cuttle fish "Sepiola", with or without shell (excl. "Sepiola rondeleti"), frozen	Exports	Cuttlefish	Frozen	NA	Cephalopod	Cephalopod	1	101.02	0	0	0	0	0	0	0	0	0	0	0	0	0	0	0	0	0	0	0	0	0	0	0	0	0	0	0	0	0	0	1	1	2	1	1	9	8	7	3	8
Austria	Cuttle fish "Sepiola", with or without shell (excl. "Sepiola rondeleti"), frozen	Imports	Cuttlefish	Frozen	NA	Cephalopod	Cephalopod	1	1858.95	0	0	0	0	0	0	0	0	0	0	0	0	0	0	0	0	0	0	0	42	59	75	60	53	77	78	73	49	50	59	54	80	164	67	74	134	116	99	66	67
Austria	Cuttlefishes (Sepia off., Rossia macrosoma, Sepiola rondeleti), live, fresh or chilled	Imports	Cuttlefish	Live, fresh or chilled	NA	Cephalopod	Cephalopod	1	146.22	0	0	0	0	0	0	0	0	0	0	0	0	0	0	0	0	0	0	0	0	0	0	0	0	0	0	0	0	0	0	0	0	0	0	0	0	0	0	0	0
Austria	Cuttlefishes, frozen	Imports	Cuttlefish	Frozen	NA	Cephalopod	Cephalopod	1	3292	0	0	0	0	0	0	0	0	0	0	0	0	0	0	0	0	0	0	0	88	82	104	62	77	153	136	119	156	127	126	129	252	199	176	237	264	209	149	142	170
Austria	Cuttlefishes, other than live, fresh or chilled	Imports	Cuttlefish	Live, fresh or chilled	NA	Cephalopod	Cephalopod	1	177	0	0	0	0	0	0	0	0	0	0	0	0	0	0	0	0	0	0	0	6	7	2	1	1	0	1	0	6	1	1	5	14	11	14	21	21	28	8	4	11
Austria	Cuttlefish and squid, prepared or preserved	Exports	Cuttlefish and squid	Prepared or preserved	NA	Cephalopod	Cephalopod	2.66	808.8	0	0	0	0	0	0	0	0	0	0	0	0	0	0	0	0	0	0	0	0	0	0	0	0	0	0	0	0	0	0	0	0	0	0	0	0	21.28	37.24	26.6	135.66
Austria	Cuttlefish and squid, prepared or preserved	Imports	Cuttlefish and squid	Prepared or preserved	NA	Cephalopod	Cephalopod	2.66	8176.63	0	0	0	0	0	0	0	0	0	0	0	0	0	0	0	0	0	0	0	0	0	0	0	0	0	0	0	0	0	0	0	0	0	0	0	0	779.38	728.84	819.28	1093.26
Austria	Cuttlefishes and squids, dried, salted or in brine, smoked nei	Imports	Cuttlefish and squid	Dried	NA	Cephalopod	Cephalopod	2.82	305.35	0	0	0	0	0	0	0	0	0	0	0	0	0	0	0	0	0	0	0	0	0	0	0	0	0	0	0	0	0	0	0	0	0	0	0	0	0	0	0	0
Austria	Cuttlefishes and squids, frozen, nei	Imports	Cuttlefish and squid	Frozen	NA	Cephalopod	Cephalopod	1	534.43	0	0	0	0	0	0	0	0	0	0	0	0	0	0	0	0	0	0	0	0	0	0	0	0	0	0	0	0	0	0	0	0	0	0	0	0	0	0	0	0
Austria	Cuttlefishes and squids, live, fresh or chilled, nei	Imports	Cuttlefish and squid	Live, fresh or chilled	NA	Cephalopod	Cephalopod	1	3265.23	0	0	0	0	0	0	0	0	0	0	0	0	184	215	273	303	366	340	341	14	36	59	78	61	25	206	67	17	24	46	32	32	49	48	72	38	76	52	41	58
Austria	Octopus, frozen	Exports	Octopus	Frozen	NA	Cephalopod	Cephalopod	1	165.22	0	0	0	0	0	0	0	0	0	0	0	0	0	0	0	0	0	0	0	0	0	0	0	0	0	0	0	0	0	0	1	0	3	7	8	16	12	13	14	18
Austria	Octopus, frozen	Imports	Octopus	Frozen	NA	Cephalopod	Cephalopod	1	1575	0	0	0	0	0	0	0	0	0	0	0	0	0	0	0	0	0	0	0	33	21	25	18	20	23	20	26	21	18	33	40	70	45	58	60	84	80	76	130	161
Austria	Octopus, live, fresh or chilled	Imports	Octopus	Live, fresh or chilled	NA	Cephalopod	Cephalopod	1	534.23	0	0	0	0	0	0	0	0	0	0	0	0	4	3	1	1	1	1	2	3	4	7	1	3	7	20	13	20	17	20	27	32	9	37	21	31	28	13	15	23
Austria	Octopus, other than live, fresh or chilled	Imports	Octopus	Live, fresh or chilled	NA	Cephalopod	Cephalopod	1	141.75	0	0	0	0	0	0	0	0	0	0	0	0	3	6	8	16	22	17	21	0	0	0	0	0	0	0	0	0	0	0	0	0	0	0	0	0	0	0	0	0
Austria	Octopus, prepared or preserved	Exports	Octopus	Prepared or preserved	NA	Cephalopod	Cephalopod	2.66	632.388	0	0	0	0	0	0	0	0	0	0	0	0	0	0	0	0	0	0	0	0	0	0	0	0	0	0	0	0	0	0	0	0	0	0	0	0	5.32	13.3	5.32	122.36
Austria	Octopus, prepared or preserved	Imports	Octopus	Prepared or preserved	NA	Cephalopod	Cephalopod	2.66	1110.63	0	0	0	0	0	0	0	0	0	0	0	0	0	0	0	0	0	0	0	0	0	0	0	0	0	0	0	0	0	0	0	0	0	0	0	0	31.92	69.16	21.28	183.54
Austria	Squid "Ommastrephes spp.", "Nototodarus spp." and "Sepioteuthis spp." (excl Ommastrephes sagittatus), frozen	Exports	Squid	Frozen	NA	Cephalopod	Cephalopod	1	177.18	0	0	0	0	0	0	0	0	0	0	0	0	0	0	0	0	0	0	0	0	0	0	1	0	0	0	0	0	0	0	0	5	7	5	0	15	16	26	21	19
Austria	Squid "Ommastrephes spp.", "Nototodarus spp." and "Sepioteuthis spp." (excl Ommastrephes sagittatus), frozen	Imports	Squid	Frozen	NA	Cephalopod	Cephalopod	1	1376.49	0	0	0	0	0	0	0	0	0	0	0	0	0	0	0	0	0	0	0	18	3	3	27	38	99	68	20	25	28	21	25	56	68	80	74	91	97	93	153	97
Austria	Squids (Illex spp.), frozen	Exports	Squid	Frozen	NA	Cephalopod	Cephalopod	1	146.36	0	0	0	0	0	0	0	0	0	0	0	0	0	0	0	0	0	0	0	0	0	0	0	0	0	0	0	0	0	6	5	2	4	12	29	20	12	4	3	4
Austria	Squids (Illex spp.), frozen	Imports	Squid	Frozen	NA	Cephalopod	Cephalopod	1	1159.99	0	0	0	0	0	0	0	0	0	0	0	0	0	0	0	0	0	0	0	9	13	21	27	20	48	44	22	43	22	49	61	30	35	99	120	55	71	57	23	59
Austria	Squids (Ommastrephes sagittatus, Loligo spp.), frozen	Exports	Squid	Frozen	NA	Cephalopod	Cephalopod	1	255.06	0	0	0	0	0	0	0	0	0	0	0	0	0	0	0	0	0	0	0	0	0	3	2	0	7	0	0	0	0	1	5	3	0	2	12	17	30	24	26	31
Austria	Squids (Ommastrephes sagittatus, Loligo spp.), frozen	Imports	Squid	Frozen	NA	Cephalopod	Cephalopod	1	6836.09	0	0	0	0	0	0	0	0	0	0	0	0	0	0	0	0	0	0	0	40	65	73	52	68	58	90	159	171	162	177	277	291	240	352	405	481	379	392	434	420
Austria	Squids (Ommastrephes sagittatus, Loligo spp.), live, fresh or chilled	Imports	Squid	Live, fresh or chilled	NA	Cephalopod	Cephalopod	1	693.12	0	0	0	0	0	0	0	0	0	0	0	0	0	0	0	0	0	0	0	24	52	59	59	25	2	5	7	7	6	12	10	14	24	72	53	73	54	26	35	41
Austria	Squids, dried, salted or in brine, smoked	Imports	Squid	Dried	NA	Cephalopod	Cephalopod	2.82	1009.56	0	0	0	0	0	0	0	0	0	0	0	0	0	0	0	0	0	0	0	0	0	0	2.82	0	0	5.64	5.64	33.84	31.02	64.86	59.22	118.44	174.84	84.6	39.48	81.78	186.12	121.26	0	0
Austria	Squids, live,fresh or chilled, nei	Imports	Squid	Live, fresh or chilled	NA	Cephalopod	Cephalopod	1	2095.5	0	0	0	0	0	0	0	0	0	0	0	0	0	0	0	0	0	0	0	50	62	53	59	55	26	63	37	39	207	178	156	152	115	157	125	65	86	72	82	97
Austria	Squids, other than live, fresh or chilled	Imports	Squid	Live, fresh or chilled	NA	Cephalopod	Cephalopod	1	656	0	0	0	0	0	0	0	0	0	0	0	0	0	0	0	0	0	0	0	2	6	7	7	18	20	22	21	23	21	32	69	121	75	48	62	25	21	15	12	14
Austria	Clupeoids, salted or in brine, nei	Imports	Clupeoids	Salted	NA	Clupeoids	Fish	2.82	679.62	0	0	0	0	0	0	0	0	0	0	0	0	36.66	0	0	0	177.66	169.2	296.1	0	0	0	0	0	0	0	0	0	0	0	0	0	0	0	0	0	0	0	0	0
Austria	Cod nei, fillets, frozen	Exports	Cod	Frozen	Fillets	Cod	Fish	1.25	164.588	0	0	0	0	0	0	0	0	0	0	0	0	0	0	0	0	0	0	0	0	0	0	0	0	0	0	0	28.75	0	0	30	0	0	1.25	25	10	7.5	18.75	5	33.75
Austria	Cod nei, fillets, frozen	Imports	Cod	Frozen	Fillets	Cod	Fish	1.25	14437.1	0	0	0	0	0	0	0	0	0	0	0	0	0	0	0	0	0	0	0	895	1116.25	1170	1020	657.5	543.75	716.25	876.25	876.25	641.25	556.25	673.75	712.5	668.75	502.5	392.5	390	296.25	231.25	312.5	323.75
Austria	Cod, meat, frozen	Imports	Cod	Frozen	Meat	Cod	Fish	1.25	156.25	0	0	0	0	0	0	0	0	0	0	0	0	0	0	0	0	0	0	0	0	3.75	30	2.5	3.75	8.75	6.25	6.25	11.25	17.5	11.25	10	18.75	10	1.25	1.25	1.25	6.25	1.25	5	0
Austria	Cods nei, fillets, fresh or chilled	Imports	Cod	Live, fresh or chilled	Fillets	Cod	Fish	1.25	15977.8	0	0	0	0	0	0	0	0	0	0	0	0	0	0	0	0	0	0	0	1600	1530	1423.75	1382.5	846.25	677.5	587.5	535	522.5	410	451.25	341.25	601.25	321.25	292.5	315	282.5	308.75	403.75	522.5	460
Austria	Cods nei, frozen	Imports	Cod	Frozen	NA	Cod	Fish	1	228	0	0	0	0	0	0	0	0	0	0	0	0	17	3	11	18	10	50	119	0	0	0	0	0	0	0	0	0	0	0	0	0	0	0	0	0	0	0	0	0
Austria	Cods, fresh or chilled, nei	Imports	Cod	Live, fresh or chilled	NA	Cod	Fish	1	461.08	0	0	0	0	0	0	0	0	0	0	0	0	22	5	2	3	5	7	6	9	16	1	1	1	0	18	0	0	9	6	235	1	2	7	10	18	6	4	3	2
Austria	Cods, not minced, prepared or preserved	Exports	Cod	Prepared or preserved	NA	Cod	Fish	2.66	401.101	0	0	0	0	0	0	7.98	0	0	0	0	2.66	7.98	0	2.66	47.88	34.58	87.78	138.32	7.98	2.66	0	0	0	0	0	0	0	0	0	0	2.66	10.64	0	0	0	0	0	0	18.62
Austria	Cods, not minced, prepared or preserved	Imports	Cod	Prepared or preserved	NA	Cod	Fish	2.66	189709	0	0	8650.32	9004.1	8363.04	7663.46	7878.92	8102.36	7724.64	9192.96	9799.44	10504.3	8993.46	10980.5	12443.5	13031.3	14340.1	16329.7	16696.8	281.96	55.86	875.14	1117.2	545.3	117.04	93.1	42.56	5.32	2.66	18.62	5.32	87.78	53.2	122.36	50.54	55.86	122.36	1449.7	1330	1391.18
Austria	Gadiformes excl. Alaska pollock, meat, whether or not minced, frozen	Imports	Cod and hake and haddock	Frozen	Meat	Cod and hake and haddock	Fish	1.25	215.812	0	0	0	0	0	0	0	0	0	0	0	0	0	0	0	0	0	0	0	0	0	0	0	0	0	0	0	0	0	0	0	0	0	0	0	0	37.5	11.25	13.75	27.5
Austria	Gadiformes fillets, frozen, nei	Exports	Cod and hake and haddock	Frozen	Fillets	Cod and hake and haddock	Fish	1.25	211.425	0	0	0	0	0	0	0	0	0	0	0	0	0	0	0	0	0	0	0	0	0	0	0	0	0	0	0	0	0	0	0	0	0	0	0	0	21.25	52.5	25	26.25
Austria	Gadiformes fillets, frozen, nei	Imports	Cod and hake and haddock	Frozen	Fillets	Cod and hake and haddock	Fish	1.25	2746.97	0	0	0	0	0	0	0	0	0	0	0	0	0	0	0	0	0	0	0	0	0	0	0	0	0	0	0	0	0	0	0	0	0	0	0	0	476.25	336.25	410	417.5
Austria	Common sole (Solea Solea), fresh or chilled	Imports	Common sole (Solea Solea)	Live, fresh or chilled	NA	Common sole	Fish	1	1902.94	0	0	0	0	0	0	0	0	0	0	0	0	41	47	54	73	83	70	70	138	130	73	54	48	50	37	45	37	33	54	62	33	100	74	71	63	46	34	44	42
Austria	Common sole (Solea Solea), frozen	Imports	Common sole (Solea Solea)	Frozen	NA	Common sole	Fish	1	420.24	0	0	0	0	0	0	0	0	0	0	0	0	25	20	16	21	19	11	16	6	8	12	14	23	17	24	8	10	8	6	11	37	24	6	13	9	7	9	9	6
Austria	American/European lobsters (Homarus spp.), live, fresh or chilled, nei	Imports	American/European lobsters (Homarus spp.)	Live, fresh or chilled	NA	Crustacean	Crustacean	1	264	0	0	0	0	0	0	0	0	0	0	0	0	25	27	36	51	44	33	48	0	0	0	0	0	0	0	0	0	0	0	0	0	0	0	0	0	0	0	0	0
Austria	American/European lobsters (Homarus spp.), meat or tails, even smoked, frozen	Imports	American/European lobsters (Homarus spp.)	Smoked	Meat or tails	Crustacean	Crustacean	2.86	382.868	0	0	0	0	0	0	0	0	0	0	0	0	0	0	0	0	0	0	0	14.3	0	0	2.86	0	2.86	0	5.72	0	0	5.72	11.44	8.58	11.44	2.86	14.3	17.16	20.02	31.46	25.74	34.32
Austria	American/European lobsters (Homarus spp.), whole, even smoked, frozen	Imports	American/European lobsters (Homarus spp.)	Smoked	NA	Crustacean	Crustacean	2	823.2	0	0	0	0	0	0	0	0	0	0	0	0	0	0	0	0	0	0	0	8	10	34	18	36	16	18	16	20	26	36	42	52	38	18	58	40	30	40	48	42
Austria	American/European lobsters (Homarus spp.), whole, fresh or chilled	Imports	American/European lobsters (Homarus spp.)	Live, fresh or chilled	NA	Crustacean	Crustacean	1	199.96	0	0	0	0	0	0	0	0	0	0	0	0	0	0	0	0	0	0	0	5	9	12	14	12	23	31	17	20	20	8	8	3	0	0	2	0	0	0	2	1
Austria	Common (=Crangon) shrimp, not frozen	Imports	Common shrimp (Crangon crangon)	NA	NA	Crustacean	Crustacean	1	209	0	0	0	0	0	0	0	0	0	0	0	0	0	0	0	0	0	0	0	5	1	7	8	4	3	9	23	14	20	16	13	12	15	16	18	19	3	0	1	1
Austria	Common shrimp (Crangon crangon), even smoked, frozen	Exports	Common shrimp (Crangon crangon)	Smoked	NA	Crustacean	Crustacean	2	560.78	0	0	0	0	0	0	0	0	0	0	0	0	0	0	0	0	0	0	0	0	0	0	0	0	0	0	0	0	0	0	0	0	0	0	0	0	4	2	0	0
Austria	Common shrimp (Crangon crangon), even smoked, frozen	Imports	Common shrimp (Crangon crangon)	Smoked	NA	Crustacean	Crustacean	2	2466.64	0	0	0	0	0	0	0	0	0	0	0	0	0	0	0	0	0	0	0	18	6	4	4	6	8	4	4	12	12	54	44	36	140	98	104	58	14	28	142	70
Austria	Shrimps Crangon crangon, in shell or not, live, fresh or chilled	Imports	Common shrimp (Crangon crangon)	Live, fresh or chilled	In shell or not	Crustacean	Crustacean	1.21	1482.21	0	0	0	0	0	0	0	0	0	0	0	0	0	0	0	0	0	0	0	8.47	56.87	24.2	33.88	59.29	48.4	89.54	90.75	82.28	36.3	31.46	30.25	43.56	25.41	39.93	41.14	33.88	2.42	27.83	13.31	16.94
Austria	Crab meat nei, prepared or preserved	Imports	Crab	Prepared or preserved	Meat	Crustacean	Crustacean	5.9701	25729.7	0	0	0	0	0	0	0	0	0	0	0	0	316.415	286.565	316.415	394.027	334.326	220.894	340.296	728.352	364.176	268.654	179.103	435.817	567.159	1229.84	829.844	1468.64	2596.99	4805.93	1952.22	1868.64	1552.23	1128.35	620.89	370.146	483.578	501.488	394.027	507.458
Austria	Crabs nei, frozen	Imports	Crab	Frozen	NA	Crustacean	Crustacean	1	1167.76	0	0	0	0	0	0	0	0	0	0	0	0	2	19	19	38	32	25	17	41	27	48	42	42	45	17	6	15	66	61	54	49	23	18	41	17	41	68	80	52
Austria	Crabs, not frozen	Imports	Crab	NA	NA	Crustacean	Crustacean	1	703	0	0	0	0	0	0	0	0	0	0	0	0	4	7	13	3	8	14	4	18	9	10	11	29	63	123	89	131	122	9	12	3	2	0	1	2	0	2	4	5
Austria	King crab, nei, frozen	Imports	Crab	Frozen	NA	Crustacean	Crustacean	1	389.38	0	0	0	0	0	0	0	0	0	0	0	0	0	0	0	0	0	0	0	3	4	5	2	7	4	9	5	4	17	27	23	18	40	28	28	23	19	10	6	8
Austria	Crustaceans nei, even smoked, frozen	Imports	Crustaceans	Smoked	NA	Crustacean	Crustacean	2	2330.8	0	0	0	0	0	0	0	0	0	0	0	0	10	28	40	56	16	10	30	8	4	28	36	78	66	142	114	132	118	38	156	128	76	126	202	144	216	28	28	74
Austria	Crustaceans nei, prepared or preserved	Imports	Crustaceans	Prepared or preserved	NA	Crustacean	Crustacean	2.27	3229.14	0	0	0	0	0	0	0	0	0	0	0	0	45.4	29.51	29.51	63.56	81.72	34.05	59.02	120.31	65.83	52.21	47.67	31.78	56.75	77.18	45.4	31.78	77.18	81.72	197.49	313.26	147.55	138.47	149.82	161.17	161.17	143.01	143.01	158.9
Austria	Miscellaneous crustaceans, not frozen, nei	Imports	Crustaceans	NA	NA	Crustacean	Crustacean	1	777	0	0	0	0	0	0	0	0	0	0	0	0	13	12	11	9	12	9	14	4	0	23	23	189	116	37	53	23	15	23	39	22	11	21	19	7	5	14	19	13
Austria	Crustaceans and molluscs, nei, frozen	Exports	Crustaceans and molluscs	Frozen	NA	Crustacean	Crustacean	1	315	189	19	20	30	27	0	0	20	0	3	1	6	0	0	0	0	0	0	0	0	0	0	0	0	0	0	0	0	0	0	0	0	0	0	0	0	0	0	0	0
Austria	Crustaceans and molluscs, nei, frozen	Imports	Crustaceans and molluscs	Frozen	NA	Crustacean	Crustacean	1	4560	239	214	259	316	416	268	326	391	466	498	581	586	0	0	0	0	0	0	0	0	0	0	0	0	0	0	0	0	0	0	0	0	0	0	0	0	0	0	0	0
Austria	Deepwater rose shrimps (Parapenaeus longirostris), frozen	Imports	Deepwater rose shrimps (Parapenaeus longirostris)	Frozen	NA	Crustacean	Crustacean	1	562.39	0	0	0	0	0	0	0	0	0	0	0	0	0	0	0	0	0	0	0	0	0	6	2	3	4	27	19	17	25	40	46	100	68	23	23	31	8	11	8	8
Austria	Crayfish (freshwater), even smoked, frozen	Imports	Freshwater crayfish	Smoked	NA	Crustacean	Crustacean	2	578.58	0	0	0	0	0	0	0	0	0	0	0	0	0	0	0	0	0	0	0	0	0	8	12	12	8	0	4	6	10	14	8	38	50	30	36	52	48	24	22	22
Austria	Crayfish (freshwater), not frozen	Imports	Freshwater crayfish	NA	NA	Crustacean	Crustacean	1	734	0	0	0	0	0	0	0	0	0	0	0	0	0	0	0	0	0	0	1	6	6	9	4	12	13	11	14	21	9	9	64	163	146	128	21	23	20	19	15	8
Austria	Lobster tails or meat, prep. or pres.	Imports	Lobster	Prepared or preserved	Meat or tails	Crustacean	Crustacean	3.2461	1515.93	0	0	0	0	0	0	0	0	0	0	0	0	22.7227	9.7383	32.461	12.9844	9.7383	6.4922	9.7383	6.4922	6.4922	22.7227	51.9376	42.1993	38.9532	16.2305	16.2305	12.9844	35.7071	16.2305	42.1993	90.8908	84.3986	61.6759	42.1993	64.922	58.4298	55.1837	71.4142	61.6759
Austria	Lobsters, live	Imports	Lobster	Live, fresh or chilled	NA	Crustacean	Crustacean	1	849.19	0	0	0	0	0	0	0	0	0	0	0	0	0	1	0	0	0	0	1	31	34	27	37	29	25	41	37	37	34	40	44	51	67	45	52	39	32	23	22	17
Austria	Rock lobster & other sea crawfish (Palinurus, Panulirus, Jasus), meat or tails, frozen	Imports	Lobster	Frozen	Meat or tails	Crustacean	Crustacean	1.43	487.716	0	0	0	0	0	0	0	0	0	0	0	0	0	0	0	0	0	0	0	2.86	0	42.9	61.49	115.83	7.15	4.29	0	10.01	1.43	2.86	5.72	14.3	11.44	12.87	17.16	8.58	12.87	14.3	15.73	27.17
Austria	Rock lobster and other sea crawfish (Palinurus, Panulirus, Jasus), even smoked, frozen, nei	Imports	Lobster	Smoked	NA	Crustacean	Crustacean	2	206.02	0	0	0	0	0	0	0	0	0	0	0	0	8	4	4	6	10	8	8	0	0	6	10	4	4	6	14	22	14	14	8	6	0	0	4	0	2	2	12	2
Austria	Norway lobsters (Nephrops spp.), nei, even smoked, frozen	Imports	Norway lobster (Nephrops norvegicus)	Smoked	NA	Crustacean	Crustacean	2	1004.66	0	0	0	0	0	0	0	0	0	0	0	0	0	0	0	0	0	0	0	16	42	50	148	66	26	88	34	34	18	8	22	24	24	28	44	46	56	26	22	22
Austria	Shrimps and prawns, dried, salted or in brine, smoked nei	Imports	Shrimps and prawns	Dried	NA	Crustacean	Crustacean	2.54	367.055	0	0	0	0	0	0	0	0	0	0	0	0	0	0	0	0	0	0	0	0	0	0	0	0	0	0	0	0	0	0	0	0	0	0	0	0	0	0	0	0
Austria	Shrimps and prawns, frozen, nei	Exports	Shrimps and prawns	Frozen	NA	Crustacean	Crustacean	1	205	0	0	0	0	0	0	0	0	0	0	0	0	0	0	1	0	0	1	1	4	19	9	1	0	2	1	0	3	1	1	2	5	12	24	64	54	0	0	0	0
Austria	Shrimps and prawns, frozen, nei	Imports	Shrimps and prawns	Frozen	NA	Crustacean	Crustacean	1	11867	0	0	0	0	0	0	0	0	0	0	0	0	92	118	169	169	236	233	328	342	386	260	246	296	283	358	425	536	602	674	670	1021	971	1089	1202	1161	0	0	0	0
Austria	Shrimps and prawns, not frozen, nei	Imports	Shrimps and prawns	NA	NA	Crustacean	Crustacean	1	1963	0	0	0	0	0	0	0	0	0	0	0	0	18	25	42	31	57	41	48	62	123	182	181	132	73	35	13	21	50	82	63	24	20	44	71	63	88	84	49	87
Austria	Shrimps and prawns, other than coldwater, even smoked, frozen	Exports	Shrimps and prawns	Smoked	NA	Crustacean	Crustacean	2	875.32	0	0	0	0	0	0	0	0	0	0	0	0	0	0	0	0	0	0	0	0	0	0	0	0	0	0	0	0	0	0	0	0	0	0	0	0	94	92	84	88
Austria	Shrimps and prawns, other than coldwater, even smoked, frozen	Imports	Shrimps and prawns	Smoked	NA	Crustacean	Crustacean	2	16695.2	0	0	0	0	0	0	0	0	0	0	0	0	0	0	0	0	0	0	0	0	0	0	0	0	0	0	0	0	0	0	0	0	0	0	0	0	2612	2224	2764	2136
Austria	Shrimps and prawns, prep. or pres., in airtight containers	Exports	Shrimps and prawns	Prepared or preserved	NA	Crustacean	Crustacean	2.27	2680.03	0	0	0	0	0	0	0	0	0	0	0	0	0	0	0	0	0	0	0	4.54	9.08	2.27	4.54	9.08	4.54	6.81	4.54	6.81	2.27	9.08	27.24	24.97	27.24	86.26	122.58	227	957.94	780.88	102.15	140.74
Austria	Shrimps and prawns, prep. or pres., in airtight containers	Imports	Shrimps and prawns	Prepared or preserved	NA	Crustacean	Crustacean	2.27	44589.7	0	0	0	0	0	0	0	0	0	0	0	0	0	0	0	0	0	0	0	651.49	824.01	649.22	572.04	458.54	767.26	839.9	572.04	833.09	2365.34	3999.74	2501.54	1475.5	1318.87	1520.9	1561.76	1529.98	1071.44	1114.57	1863.67	2894.25
Austria	Shrimps and prawns, prep. or pres., not in airtight containers	Exports	Shrimps and prawns	Prepared or preserved	NA	Crustacean	Crustacean	2.27	4291.46	0	0	0	0	0	0	0	0	0	0	0	0	0	0	0	0	0	0	0	2.27	18.16	0	0	0	2.27	0	4.54	6.81	4.54	11.35	320.07	372.28	558.42	376.82	63.56	497.13	179.33	170.25	251.97	331.42
Austria	Shrimps and prawns, prep. or pres., not in airtight containers	Imports	Shrimps and prawns	Prepared or preserved	NA	Crustacean	Crustacean	2.27	35339.9	0	0	0	0	0	0	0	0	0	0	0	0	0	0	0	0	0	0	0	349.58	751.37	649.22	590.2	610.63	669.65	533.45	562.96	562.96	583.39	631.06	708.24	1037.39	1384.7	3309.66	1843.24	1770.6	1582.19	1734.28	2036.19	1863.67
Austria	Shrimps, prawns, prepared or preserved, nei	Imports	Shrimps and prawns	Prepared or preserved	NA	Crustacean	Crustacean	2.27	6494.47	0	0	0	0	0	0	0	0	0	0	0	0	653.76	751.37	758.18	896.65	939.78	1082.79	1411.94	0	0	0	0	0	0	0	0	0	0	0	0	0	0	0	0	0	0	0	0	0
Austria	Cold-water shrimps and prawns (Pandalus spp., Crangon crangon), frozen, even smoked, whether in shell or not	Exports	Shrimps and prawns (Pandalus spp.)	Smoked	In shell or not	Crustacean	Crustacean	2.42	379.94	0	0	0	0	0	0	0	0	0	0	0	0	0	0	0	0	0	0	0	0	0	0	0	0	0	0	0	0	0	0	0	0	0	0	0	0	48.4	70.18	79.86	48.4
Austria	Cold-water shrimps and prawns (Pandalus spp., Crangon crangon), frozen, even smoked, whether in shell or not	Imports	Shrimps and prawns (Pandalus spp.)	Smoked	In shell or not	Crustacean	Crustacean	2.42	2197.36	0	0	0	0	0	0	0	0	0	0	0	0	0	0	0	0	0	0	0	0	0	0	0	0	0	0	0	0	0	0	0	0	0	0	0	0	319.44	435.6	396.88	479.16
Austria	Cold-water shrimps and prawns (Pandalus spp., Crangon crangon), not frozen	Imports	Shrimps and prawns (Pandalus spp.)	NA	NA	Crustacean	Crustacean	1	587	0	0	0	0	0	0	0	0	0	0	0	0	0	0	0	0	0	0	0	0	0	0	0	0	0	0	0	0	0	0	0	0	0	0	0	0	163	155	161	98
Austria	Shrimps and prawns (Pandalus spp.), frozen	Exports	Shrimps and prawns (Pandalus spp.)	Frozen	NA	Crustacean	Crustacean	1	411.27	0	0	0	0	0	0	0	0	0	0	0	0	0	0	0	0	0	5	1	0	0	0	0	0	0	2	1	1	0	1	6	14	16	14	9	13	6	6	9	9
Austria	Shrimps and prawns (Pandalus spp.), frozen	Imports	Shrimps and prawns (Pandalus spp.)	Frozen	NA	Crustacean	Crustacean	1	4738.12	0	0	0	0	0	0	0	0	0	0	0	0	77	95	109	177	203	224	315	78	73	68	93	115	103	97	85	122	139	140	263	405	397	391	212	216	48	64	45	39
Austria	Shrimps and prawns (Pandalus spp.), not frozen	Imports	Shrimps and prawns (Pandalus spp.)	NA	NA	Crustacean	Crustacean	1	727	0	0	0	0	0	0	0	0	0	0	0	0	4	1	1	1	1	3	2	27	16	56	59	34	33	32	26	18	7	8	16	2	65	33	132	150	0	0	0	0
Austria	Shrimps and prawns (Penaeus spp.), frozen	Exports	Shrimps and prawns (Penaeus spp.)	Frozen	NA	Crustacean	Crustacean	1	1802.58	0	0	0	0	0	0	0	0	0	0	0	0	0	0	0	0	0	0	0	0	0	0	0	0	0	0	1	3	0	3	13	32	41	80	78	161	175	152	169	168
Austria	Shrimps and prawns (Penaeus spp.), frozen	Imports	Shrimps and prawns (Penaeus spp.)	Frozen	NA	Crustacean	Crustacean	1	17750.1	0	0	0	0	0	0	0	0	0	0	0	0	0	0	0	0	0	0	0	0	0	0	23	83	86	83	91	144	350	322	458	506	535	675	1173	1313	1481	1214	1173	1385
Austria	Shrimps Pandalidae nei (excl. Pandalus spp), not frozen	Imports	Shrimps of the family Pandalidae	NA	NA	Crustacean	Crustacean	1	144	0	0	0	0	0	0	0	0	0	0	0	0	0	0	0	0	0	0	0	0	0	0	0	0	0	0	0	0	0	0	0	0	0	0	0	0	42	27	21	25
Austria	Shrimps of the family Pandalidae nei (excl Pandalus spp), frozen	Imports	Shrimps of the family Pandalidae	Frozen	NA	Crustacean	Crustacean	1	1171.95	0	0	0	0	0	0	0	0	0	0	0	0	0	0	0	0	0	0	0	0	0	0	0	0	0	0	0	0	0	0	0	0	0	0	0	0	172	273	137	125
Austria	Dogfish and other sharks nei (excl. Squalus acanthias, Scyliorhinus spp., Lamna nasus, Prionace glauca), frozen	Imports	Dogfish and other sharks	Frozen	NA	Dogfish and other sharks	Fish	1	270.3	0	0	0	0	0	0	0	0	0	0	0	0	21	25	30	29	15	16	19	14	19	19	13	9	5	2	2	4	1	3	2	5	4	2	2	1	1	3	1	1
Austria	Eels and elvers live	Exports	Eels	Live, fresh or chilled	NA	Eels	Fish	1	793	0	0	0	0	0	0	0	0	0	0	0	0	70	103	81	40	54	46	40	100	98	86	62	2	1	2	6	1	1	0	0	0	0	0	0	0	0	0	0	0
Austria	Eels, frozen	Imports	Eels	Frozen	NA	Eels	Fish	1	118.01	0	0	0	0	0	0	0	0	0	0	0	0	3	0	3	1	0	1	1	0	0	1	1	0	0	1	4	6	12	11	14	1	5	1	14	12	17	0	3	1
Austria	River eels, prepared or preserved, not minced, nei	Imports	Eels	Prepared or preserved	NA	Eels	Fish	2.66	783.104	0	0	0	0	0	0	0	0	0	0	0	0	2.66	2.66	2.66	0	0	0	0	0	0	0	0	0	0	0	0	0	0	0	0	0	0	0	0	0	212.8	159.6	90.44	85.12
Austria	European plaice (Pleuronectes platessa), fresh or chilled	Imports	European plaice	Live, fresh or chilled	NA	European plaice	Fish	1	676	0	0	0	0	0	0	0	0	0	0	0	0	13	9	15	7	5	8	4	35	30	20	13	7	6	24	21	13	34	55	43	13	13	14	22	22	23	26	29	25
Austria	European plaice fillets, frozen	Exports	European plaice	Frozen	Fillets	European plaice	Fish	1.25	355.7	0	0	0	0	0	0	0	0	0	0	0	0	0	0	0	0	0	0	0	0	1.25	6.25	0	10	0	0	0	0	0	8.75	15	3.75	11.25	5	20	22.5	13.75	3.75	90	116.25
Austria	European plaice fillets, frozen	Imports	European plaice	Frozen	Fillets	European plaice	Fish	1.25	26549.6	0	0	0	0	0	0	0	0	0	0	0	0	0	0	0	0	0	0	0	1411.25	1992.5	1906.25	1750	1516.25	1560	1590	1467.5	1515	1390	1187.5	1333.75	1783.75	870	672.5	443.75	615	462.5	318.75	651.25	540
Austria	European plaice, frozen	Imports	European plaice	Frozen	NA	European plaice	Fish	1	2677.25	0	0	0	0	0	0	0	0	0	0	0	0	12	3	7	1	4	1	6	85	95	100	108	95	5	72	70	72	50	41	79	84	99	267	203	235	209	170	156	96
Austria	European sardine , fresh or chilled	Imports	European sardine	Live, fresh or chilled	NA	European sardine	Fish	1	250.47	0	0	0	0	0	0	0	0	0	0	0	0	0	0	0	0	0	0	0	1	3	2	8	11	23	25	11	12	5	4	5	5	1	1	5	19	9	11	9	14
Austria	European sardine, frozen	Exports	European sardine	Frozen	NA	European sardine	Fish	1	364.04	0	0	0	0	0	0	0	0	0	0	0	0	0	0	0	0	0	0	0	0	0	0	0	0	0	19	36	68	96	18	115	0	0	0	0	3	1	0	0	2
Austria	European sardine, frozen	Imports	European sardine	Frozen	NA	European sardine	Fish	1	1011.4	0	0	0	0	0	0	0	0	0	0	0	0	0	0	0	0	0	0	0	33	28	29	9	9	27	45	73	128	213	46	151	33	37	18	8	6	7	8	7	12
Austria	European sardine, prepared or preserved, not minced, in oil	Exports	European sardine	Prepared or preserved	Heads-off and gutted	European sardine	Fish	2.66	1898.79	0	0	0	0	0	0	0	0	0	0	0	0	2.66	23.94	13.3	106.4	10.64	42.56	95.76	670.32	55.86	66.5	2.66	45.22	2.66	13.3	15.96	0	0	15.96	26.6	199.5	21.28	21.28	37.24	58.52	26.6	66.5	103.74	18.62
Austria	European sardine, prepared or preserved, not minced, in oil	Imports	European sardine	Prepared or preserved	Heads-off and gutted	European sardine	Fish	2.66	67933.9	0	0	0	0	0	0	0	0	0	0	0	0	4096.4	5200.3	5187	4338.46	6974.52	4256	6469.12	1292.76	917.7	571.9	688.94	766.08	202.16	1042.72	1699.74	1957.76	1885.94	1787.52	1627.92	1989.68	1851.36	1705.06	1694.42	1388.52	1287.44	1239.56	1061.34	678.3
Austria	European sardine, prepared or preserved, not minced, nei	Exports	European sardine	Prepared or preserved	NA	European sardine	Fish	2.66	7848.33	0	0	0	0	0	0	0	0	0	0	0	0	0	0	0	0	0	0	0	37.24	26.6	140.98	55.86	61.18	7.98	47.88	7.98	0	2.66	1026.76	383.04	827.26	1218.28	550.62	1002.82	359.1	239.4	79.8	82.46	69.16
Austria	European sardine, prepared or preserved, not minced, nei	Imports	European sardine	Prepared or preserved	NA	European sardine	Fish	2.66	60445.5	0	0	0	0	0	0	0	0	0	0	0	0	348.46	42.56	82.46	74.48	63.84	93.1	77.14	5854.66	6221.74	1439.06	1508.22	1901.9	1314.04	1343.3	1662.5	1569.4	1670.48	2282.28	2449.86	3165.4	3801.14	2436.56	2691.92	1790.18	1997.66	2010.96	1760.92	1912.54
Austria	Euthynnus excl. skipjack or stripe-bellied bonitos, fresh or chilled	Imports	Euthynnus other than skipjack	Live, fresh or chilled	NA	Euthynnus other than skipjack	Fish	1	549.02	0	0	0	0	0	0	0	0	0	0	0	0	0	0	0	0	0	0	0	3	6	13	5	3	23	56	14	27	11	1	7	8	13	51	52	72	41	18	29	17
Austria	Euthynnus excl. skipjack or stripe-bellied bonitos, frozen	Imports	Euthynnus other than skipjack	Frozen	NA	Euthynnus other than skipjack	Fish	1	626	0	0	0	0	0	0	0	0	0	0	0	0	0	0	0	0	0	0	0	8	5	0	7	52	69	27	95	71	58	51	22	36	26	32	48	10	1	1	5	2
Austria	Euthynnus other than skipjack prep. or pres. not minced, nei	Imports	Euthynnus other than skipjack	Prepared or preserved	NA	Euthynnus other than skipjack	Fish	2.66	883.705	0	0	0	0	0	0	0	0	0	0	0	0	0	0	0	0	0	0	0	74.48	23.94	13.3	13.3	133	21.28	18.62	7.98	26.6	0	13.3	2.66	90.44	380.38	0	0	0	0	0	15.96	23.94
Austria	Fish dried, whether or not salted, nei	Imports	Fish	Dried	NA	Fish	Fish	2.82	329.884	0	0	0	0	0	0	0	0	0	0	0	0	0	0	0	0	0	0	0	0	84.6	2.82	0	0	0	0	64.86	101.52	8.46	2.82	0	0	2.82	0	5.64	11.28	0	0	5.64	2.82
Austria	Fish fillets, dried, salted or in brine, nei	Imports	Fish	Dried	Fillets	Fish	Fish	2.82	2159.44	0	0	0	0	0	0	0	0	0	0	0	0	8.46	14.1	25.38	50.76	59.22	64.86	14.1	118.44	90.24	107.16	81.78	33.84	42.3	90.24	64.86	84.6	98.7	177.66	253.8	160.74	53.58	104.34	107.16	177.66	2.82	8.46	8.46	8.46
Austria	Fish fillets, fresh or chilled, nei	Imports	Fish	Live, fresh or chilled	Fillets	Fish	Fish	1.25	20303.8	0	0	0	0	0	0	0	0	0	0	0	0	3355	3525	3547.5	3160	2376.25	2126.25	2213.75	0	0	0	0	0	0	0	0	0	0	0	0	0	0	0	0	0	0	0	0	0
Austria	Fish fillets, prep. or pres, incl. raw, coated in batter or breadcrum, cooked or not, frozen	Exports	Fish	Frozen	Fillets	Fish	Fish	1.25	10497.6	0	0	0	0	0	0	0	0	0	0	0	0	0	0	1.25	6.25	21.25	2.5	2.5	107.5	102.5	60	63.75	16.25	5	41.25	16.25	47.5	52.5	112.5	132.5	103.75	155	341.25	691.25	735	765	753.75	833.75	1017.5
Austria	Fish fillets, prep. or pres, incl. raw, coated in batter or breadcrum, cooked or not, frozen	Imports	Fish	Frozen	Fillets	Fish	Fish	1.25	178283	0	0	0	0	0	0	0	0	0	0	0	0	347.5	498.75	750	906.25	770	928.75	966.25	7338.75	7893.75	6621.25	6253.75	6367.5	5023.75	5748.75	6226.25	5642.5	5628.75	5912.5	7271.25	7302.5	6337.5	6185	7027.5	6911.25	7430	8248.75	8283.75	8788.75
Austria	Fish heads, tail, maws etc., smoked, dried, salted, or in brine	Imports	Fish	Smoked	Heads, tails, maws	Fish	Fish	10	14052.1	0	0	0	0	0	0	0	0	0	0	0	0	0	0	0	0	0	0	0	0	0	0	0	0	0	0	0	0	0	0	0	0	0	0	0	0	4110	1720	2060	2000
Austria	Fish live, nei	Imports	Fish	Live, fresh or chilled	NA	Fish	Fish	1	1014	0	0	0	0	0	0	0	0	0	0	0	0	94	108	77	126	182	174	253	0	0	0	0	0	0	0	0	0	0	0	0	0	0	0	0	0	0	0	0	0
Austria	Fish meat, whether or not minced, frozen, nei	Imports	Fish	Frozen	Meat	Fish	Fish	1.25	625	0	0	0	0	0	0	0	0	0	0	0	0	67.5	71.25	65	82.5	107.5	120	111.25	0	0	0	0	0	0	0	0	0	0	0	0	0	0	0	0	0	0	0	0	0
Austria	Fish minced (=surimi), frozen	Exports	Fish	Frozen	Minced	Fish	Fish	1.25	268.212	0	0	0	0	0	0	0	0	0	0	0	0	0	0	0	0	0	0	0	0	0	0	1.25	0	0	0	0	0	0	0	0	0	0	0	0	22.5	16.25	18.75	32.5	40
Austria	Fish minced (=surimi), frozen	Imports	Fish	Frozen	Minced	Fish	Fish	1.25	1427.49	0	0	0	0	0	0	0	0	0	0	0	0	0	0	0	0	0	0	0	1.25	3.75	12.5	10	11.25	13.75	18.75	16.25	8.75	31.25	43.75	53.75	53.75	53.75	66.25	90	100	55	6.25	271.25	110
Austria	Fish minced nei, prepared or preserved	Exports	Fish	Prepared or preserved	Minced	Fish	Fish	2.66	5650.32	0	0	0	0	0	0	0	0	0	0	0	0	71.82	103.74	66.5	122.36	127.68	87.78	156.94	212.8	117.04	119.7	5.32	21.28	18.62	130.34	37.24	42.56	55.86	148.96	226.1	175.56	151.62	79.8	138.32	513.38	837.9	271.32	273.98	236.74
Austria	Fish minced nei, prepared or preserved	Imports	Fish	Prepared or preserved	Minced	Fish	Fish	2.66	114690	0	0	0	0	0	0	0	0	0	0	0	0	1633.24	915.04	840.56	505.4	468.16	699.58	1327.34	1689.1	1082.62	1601.32	1367.24	1375.22	1739.64	2851.52	2452.52	4011.28	5362.56	6104.7	5282.76	4934.3	5048.68	4737.46	5867.96	5719	6043.52	6346.76	7025.06	5516.84
Austria	Fish nei, prepared or preserved, not minced	Exports	Fish	Prepared or preserved	NA	Fish	Fish	2.66	12245.7	327.18	335.16	228.76	289.94	276.64	1061.34	1588.02	2104.06	1548.12	907.06	1165.08	611.8	13.3	31.92	18.62	37.24	13.3	13.3	23.94	26.6	18.62	39.9	23.94	0	5.32	7.98	18.62	15.96	69.16	143.64	34.58	234.08	39.9	45.22	82.46	50.54	23.94	90.44	63.84	140.98
Austria	Fish nei, prepared or preserved, not minced	Imports	Fish	Prepared or preserved	NA	Fish	Fish	2.66	281115	28201.3	25927	14212.4	16787.3	16050.4	16590.4	16625	20053.7	17925.7	17630.5	19662.7	21623.1	1306.06	1298.08	1274.14	1032.08	1210.3	1292.76	1324.68	694.26	1441.72	1319.36	1569.4	2580.2	2000.32	1931.16	1521.52	1452.36	1585.36	2362.08	2723.84	4349.1	3053.68	1388.52	1314.04	1353.94	1000.16	1212.96	532	574.56
Austria	Fish nei, salted or in brine	Imports	Fish	Salted	NA	Fish	Fish	2.82	14143.3	854.46	1119.54	798.06	764.22	814.98	1536.9	1336.68	846	820.62	987	851.64	665.52	62.04	180.48	64.86	738.84	115.62	2.82	0	59.22	0	0	8.46	45.12	141	327.12	191.76	50.76	19.74	16.92	76.14	5.64	5.64	2.82	11.28	11.28	22.56	78.96	67.68	93.06
Austria	Fish nei, smoked	Exports	Fish	Smoked	NA	Fish	Fish	2.5	414.45	0	0	0	0	0	2.5	2.5	40	30	20	7.5	2.5	45	12.5	5	15	2.5	17.5	20	0	0	7.5	0	0	5	17.5	15	10	20	17.5	17.5	15	2.5	0	35	17.5	0	0	0	0
Austria	Fish nei, smoked	Imports	Fish	Smoked	NA	Fish	Fish	2.5	15151.8	600	625	547.5	640	662.5	615	625	722.5	727.5	750	962.5	1132.5	430	572.5	582.5	607.5	735	740	692.5	0	72.5	60	87.5	80	77.5	45	42.5	132.5	112.5	70	65	87.5	65	42.5	102.5	115	90	62.5	82.5	287.5
Austria	Flatfish nei, fillets, fresh or chilled	Imports	Flatfish	Live, fresh or chilled	Fillets	Flatfish	Fish	1.25	293.5	0	0	0	0	0	0	0	0	0	0	0	0	0	0	0	0	0	0	0	0	0	0	0	0	0	0	0	0	0	0	0	0	0	0	0	0	45	31.25	57.5	40
Austria	Flatfish nei, fillets, frozen	Imports	Flatfish	Frozen	Fillets	Flatfish	Fish	1.25	1946.92	0	0	0	0	0	0	0	0	0	0	0	0	0	0	0	0	0	0	0	0	0	0	0	0	0	0	0	0	0	0	0	0	0	0	0	0	108.75	136.25	177.5	221.25
Austria	Flatfish nei, frozen	Imports	Flatfish	Frozen	NA	Flatfish	Fish	1	590.21	0	0	0	0	0	0	0	0	0	0	0	0	17	5	3	2	2	7	7	9	35	65	40	99	0	0	1	36	25	31	16	34	64	34	31	21	2	0	1	1
Austria	Flatfish, fresh or chilled, nei	Imports	Flatfish	Live, fresh or chilled	NA	Flatfish	Fish	1	1987.23	0	0	0	0	0	0	0	0	0	0	0	0	37	39	42	49	56	58	57	66	64	52	54	60	67	52	73	69	138	142	166	128	174	110	121	63	10	6	3	6
Austria	Flounder fillets, frozen	Imports	Flounder	Frozen	Fillets	Flounder	Fish	1.25	156.725	0	0	0	0	0	0	0	0	0	0	0	0	0	0	0	0	0	0	0	55	11.25	13.75	12.5	8.75	5	0	0	0	0	0	0	0	0	0	0	0	2.5	8.75	6.25	5
Austria	Flounder, frozen	Imports	Flounder	Frozen	NA	Flounder	Fish	1	196.04	0	0	0	0	0	0	0	0	0	0	0	0	0	0	0	0	0	0	0	0	0	0	1	20	0	0	12	27	20	16	8	1	2	1	2	3	2	1	4	3
Austria	Freshwater fish fillets, fresh or chilled, nei	Exports	Freshwater fish	Live, fresh or chilled	Fillets	Freshwater fish	Fish	1.25	22608.3	0	0	0	0	0	0	0	0	0	0	0	0	6.25	55	70	96.25	77.5	63.75	66.25	5	0	2.5	0	47.5	8.75	7.5	2028.75	7047.5	10915	1952.5	0	11.25	13.75	2.5	3.75	12.5	5	10	17.5	16.25
Austria	Freshwater fish fillets, fresh or chilled, nei	Imports	Freshwater fish	Live, fresh or chilled	Fillets	Freshwater fish	Fish	1.25	35487.8	0	0	0	0	0	0	0	0	0	0	0	0	2.5	2.5	28.75	12.5	31.25	46.25	75	240	360	335	336.25	616.25	312.5	402.5	2372.5	7480	11450	2628.75	653.75	1192.5	630	516.25	507.5	598.75	195	357.5	645	748.75
Austria	Freshwater fish fillets, nei, frozen	Exports	Freshwater fish	Frozen	Fillets	Freshwater fish	Fish	1.25	2229.2	0	0	0	0	0	0	0	0	0	0	0	0	0	0	2.5	3.75	5	3.75	1.25	113.75	48.75	33.75	3.75	6.25	31.25	31.25	11.25	26.25	20	3.75	30	56.25	206.25	372.5	108.75	63.75	117.5	60	50	52.5
Austria	Freshwater fish fillets, nei, frozen	Imports	Freshwater fish	Frozen	Fillets	Freshwater fish	Fish	1.25	44468.9	0	0	0	0	0	0	0	0	0	0	0	0	321.25	467.5	395	421.25	598.75	490	493.75	806.25	632.5	740	1016.25	1195	835	1093.75	932.5	1140	1763.75	1691.25	2062.5	3395	4012.5	4580	2036.25	1990	1346.25	1337.5	1377.5	1138.75
Austria	Freshwater fish meat, whether or not minced, fresh or chilled, nei	Imports	Freshwater fish	Live, fresh or chilled	Meat	Freshwater fish	Fish	1.25	245.25	0	0	0	0	0	0	0	0	0	0	0	0	0	0	0	0	0	0	0	0	0	0	0	0	0	0	0	0	0	0	0	21.25	27.5	40	68.75	75	0	0	0	2.5
Austria	Freshwater fish meat, whether or not minced, frozen, nei	Imports	Freshwater fish	Frozen	Meat	Freshwater fish	Fish	1.25	1873.38	0	0	0	0	0	0	0	0	0	0	0	0	0	0	0	0	0	0	0	0	0	0	0	0	0	0	0	0	0	0	0	418.75	276.25	196.25	195	112.5	120	61.25	131.25	168.75
Austria	Freshwater fish nei, frozen	Exports	Freshwater fish	Frozen	NA	Freshwater fish	Fish	1	1373.04	0	0	0	0	0	0	0	0	0	0	0	0	0	0	0	0	0	0	0	0	0	0	0	1	0	1	1	11	7	87	89	216	124	206	201	386	21	1	19	1
Austria	Freshwater fish nei, frozen	Imports	Freshwater fish	Frozen	NA	Freshwater fish	Fish	1	1420.65	0	0	0	0	0	0	0	0	0	0	0	0	11	13	24	17	3	25	87	20	14	18	9	24	50	51	21	54	43	50	45	155	89	79	122	60	110	88	41	23
Austria	Freshwater fish nei, live	Exports	Freshwater fish	Live, fresh or chilled	NA	Freshwater fish	Fish	1	1560.68	0	0	0	0	0	0	0	0	0	0	0	0	0	0	0	0	0	0	0	1	32	141	156	195	173	228	222	265	89	31	3	0	0	1	0	0	2	1	5	6
Austria	Freshwater fish nei, live	Imports	Freshwater fish	Live, fresh or chilled	NA	Freshwater fish	Fish	1	11925.3	0	0	0	0	0	0	0	0	0	0	0	0	0	0	0	0	0	0	0	119	206	424	418	423	438	450	445	598	438	382	579	639	598	888	949	380	412	336	449	576
Austria	Freshwater fish, nei, fresh or chilled	Exports	Freshwater fish	Live, fresh or chilled	NA	Freshwater fish	Fish	1	2508.09	167	142	204	293	152	125	261	158	100	138	236	100	5	4	19	33	31	16	4	0	0	0	36	36	2	4	39	55	106	0	1	0	0	3	2	3	0	6	3	3
Austria	Freshwater fish, nei, fresh or chilled	Imports	Freshwater fish	Live, fresh or chilled	NA	Freshwater fish	Fish	1	7225.47	183	248	215	267	339	301	281	330	232	400	353	385	37	52	64	93	95	83	93	98	74	81	105	85	72	65	73	104	157	58	34	64	75	93	55	61	85	128	339	149
Austria	Gilt-head seabream, fresh or chilled	Exports	Gilt-head seabream	Live, fresh or chilled	NA	Gilt-head seabream	Fish	1	2666.45	0	0	0	0	0	0	0	0	0	0	0	0	0	0	0	0	0	0	0	0	0	0	0	0	46	0	4	28	10	0	0	0	67	47	82	643	724	62	5	25
Austria	Gilt-head seabream, fresh or chilled	Imports	Gilt-head seabream	Live, fresh or chilled	NA	Gilt-head seabream	Fish	1	6571.96	0	0	0	0	0	0	0	0	0	0	0	0	0	0	0	0	0	0	0	0	19	36	52	35	94	61	72	144	130	140	156	194	222	188	269	798	864	181	206	206
Austria	Gilt-head seabream, frozen	Exports	Gilt-head seabream	Frozen	NA	Gilt-head seabream	Fish	1	2339.97	0	0	0	0	0	0	0	0	0	0	0	0	0	0	0	0	0	0	0	0	0	0	0	0	0	0	0	0	0	0	0	0	0	0	0	0	253	512	385	458
Austria	Gilt-head seabream, frozen	Imports	Gilt-head seabream	Frozen	NA	Gilt-head seabream	Fish	1	2523.98	0	0	0	0	0	0	0	0	0	0	0	0	0	0	0	0	0	0	0	0	0	0	0	0	0	0	0	0	0	0	0	0	0	0	0	0	272	530	422	479
Austria	Greenland cod, frozen	Imports	Greenland cod	Frozen	NA	Greenland cod	Fish	1	155.74	0	0	0	0	0	0	0	0	0	0	0	0	0	0	0	0	0	0	0	0	0	0	0	0	0	0	8	0	0	0	0	0	0	0	0	0	9	2	3	4
Austria	Greenland halibut, fresh or chilled	Imports	Greenland halibut	Live, fresh or chilled	NA	Greenland halibut	Fish	1	611.82	0	0	0	0	0	0	0	0	0	0	0	0	0	0	0	0	0	0	0	14	10	8	3	2	2	0	1	0	1	0	3	33	37	79	57	10	14	3	6	3
Austria	Greenland halibut, frozen	Imports	Greenland halibut	Frozen	NA	Greenland halibut	Fish	1	875.22	0	0	0	0	0	0	0	0	0	0	0	0	0	0	0	0	0	0	0	28	40	32	38	35	39	25	26	22	14	15	13	15	18	17	58	43	50	41	55	66
Austria	Greenland halibut, smoked	Imports	Greenland halibut	Smoked	NA	Greenland halibut	Fish	2.5	317.35	0	0	0	0	0	0	0	0	0	0	0	0	10	10	5	5	5	5	5	0	0	5	0	17.5	17.5	15	12.5	37.5	27.5	12.5	5	2.5	5	7.5	5	10	12.5	22.5	10	17.5
Austria	Grenadiers fillets, frozen	Imports	Grenadiers	Frozen	Fillets	Grenadiers	Fish	1.25	1134.51	0	0	0	0	0	0	0	0	0	0	0	0	52.5	121.25	21.25	52.5	132.5	32.5	65	165	6.25	46.25	56.25	1.25	12.5	0	31.25	5	5	2.5	1.25	0	2.5	13.75	6.25	10	65	18.75	35	16.25
Austria	Grenadiers, frozen	Imports	Grenadiers	Frozen	NA	Grenadiers	Fish	1	184.16	0	0	0	0	0	0	0	0	0	0	0	0	0	0	0	0	0	0	0	0	0	0	0	0	0	0	0	0	0	1	0	0	2	0	0	0	3	22	76	28
Austria	Haddock fillets, frozen	Imports	Haddock	Frozen	Fillets	Haddock	Fish	1.25	973.862	0	0	0	0	0	0	0	0	0	0	0	0	0	0	0	0	0	0	0	278.75	93.75	26.25	33.75	20	12.5	13.75	20	18.75	57.5	33.75	68.75	45	28.75	16.25	17.5	18.75	13.75	5	28.75	50
Austria	Hake meat, frozen	Imports	Hake	Frozen	Meat	Hake	Fish	1.25	305.238	0	0	0	0	0	0	0	0	0	0	0	0	0	0	0	0	0	0	0	3.75	0	1.25	0	0	0	32.5	31.25	31.25	13.75	0	0	0	0	0	0	0	5	6.25	18.75	25
Austria	Hake nei fillets, frozen	Imports	Hake	Frozen	Fillets	Hake	Fish	1.25	3728.22	0	0	0	0	0	0	0	0	0	0	0	0	0	0	0	0	0	0	0	657.5	780	338.75	340	277.5	165	266.25	177.5	130	137.5	22.5	21.25	12.5	13.75	7.5	12.5	36.25	53.75	31.25	40	45
Austria	Hake nei, fresh or chilled	Imports	Hake	Live, fresh or chilled	NA	Hake	Fish	1	176.23	0	0	0	0	0	0	0	0	0	0	0	0	0	0	0	0	0	0	0	0	2	1	0	0	0	1	3	4	3	6	5	9	12	9	13	4	2	3	4	2
Austria	Hake, not minced, prepared or preserved	Imports	Hake	Prepared or preserved	NA	Hake	Fish	2.66	27849.3	0	0	0	0	0	0	0	0	0	0	0	0	0	0	0	0	0	0	0	1582.7	1518.86	1681.12	1183.7	1162.42	1016.12	1130.5	1204.98	1024.1	1375.22	1481.62	1470.98	2399.32	2218.44	1931.16	965.58	712.88	928.34	904.4	649.04	444.22
Austria	Hakes nei, frozen	Imports	Hake	Frozen	NA	Hake	Fish	1	165.57	0	0	0	0	0	0	0	0	0	0	0	0	5	1	0	2	0	0	0	0	3	0	0	0	11	13	8	1	3	1	1	4	3	2	9	15	8	15	9	7
Austria	Hake of the genus Urophycis, fillets, frozen	Imports	Hake of the genus Urophycis	Frozen	Fillets	Hake of the genus Urophycis	Fish	1.25	149.225	0	0	0	0	0	0	0	0	0	0	0	0	0	0	0	0	0	0	0	0	5	20	8.75	8.75	5	0	0	0	3.75	2.5	0	13.75	3.75	0	1.25	0	2.5	2.5	23.75	2.5
Austria	Hake of the genus Urophycis, frozen	Imports	Hake of the genus Urophycis	Frozen	NA	Hake of the genus Urophycis	Fish	1	123.12	0	0	0	0	0	0	0	0	0	0	0	0	0	0	0	0	0	0	0	0	0	0	0	2	0	0	1	0	0	0	1	0	0	0	0	0	0	9	15	1
Austria	Halibuts nei, frozen	Imports	Halibut	Frozen	NA	Halibut	Fish	1	177	0	0	0	0	0	0	0	0	0	0	0	0	20	25	36	29	23	21	23	0	0	0	0	0	0	0	0	0	0	0	0	0	0	0	0	0	0	0	0	0
Austria	Flaps of herring, fresh or chilled	Exports	Herring	Live, fresh or chilled	Flaps	Herring	Fish	1.25	3232.51	0	0	0	0	0	0	0	0	0	0	0	0	0	0	0	0	0	0	0	0	85	302.5	282.5	196.25	835	785	643.75	102.5	0	0	0	0	0	0	0	0	0	0	0	0
Austria	Flaps of herring, fresh or chilled	Imports	Herring	Live, fresh or chilled	Flaps	Herring	Fish	1.25	19439.9	0	0	0	0	0	0	0	0	0	0	0	0	0	0	0	0	0	0	0	1187.5	680	1437.5	1945	1555	2007.5	2191.25	1746.25	1306.25	1712.5	1367.5	1562.5	670	31.25	0	0	23.75	0	1.25	1.25	2.5
Austria	Herring fillets, dried, salted or in brine	Imports	Herring	Dried	Fillets	Herring	Fish	2.82	741.66	0	0	0	0	0	0	0	0	0	0	0	0	138.18	126.9	135.36	98.7	135.36	84.6	22.56	0	0	0	0	0	0	0	0	0	0	0	0	0	0	0	0	0	0	0	0	0
Austria	Herring fillets, incl. coated in batter, cooked or not	Exports	Herring	NA	Fillets	Herring	Fish	1.25	186.3	0	0	0	0	0	0	0	0	0	0	0	0	0	0	0	0	0	0	0	0	0	1.25	0	1.25	0	0	0	0	0	1.25	5	11.25	15	6.25	3.75	0	5	1.25	3.75	5
Austria	Herring fillets, incl. coated in batter, cooked or not	Imports	Herring	NA	Fillets	Herring	Fish	1.25	4145.16	0	0	0	0	0	0	0	0	0	0	0	0	0	0	0	0	0	0	0	63.75	281.25	45	52.5	83.75	70	102.5	193.75	172.5	217.5	776.25	260	290	297.5	237.5	202.5	73.75	70	62.5	67.5	91.25
Austria	Herring meat, frozen	Imports	Herring	Frozen	Meat	Herring	Fish	1.25	1193.2	0	0	0	0	0	0	0	0	0	0	0	0	16.25	15	0	0	3.75	2.5	6.25	5	2.5	0	2.5	0	0	0	10	23.75	22.5	0	31.25	27.5	0	127.5	100	101.25	121.25	102.5	75	102.5
Austria	Herring nei, fillets, fresh or chilled	Imports	Herring	Live, fresh or chilled	Fillets	Herring	Fish	1.25	9148.75	0	0	0	0	0	0	0	0	0	0	0	0	1402.5	1538.75	1406.25	1208.75	1162.5	946.25	1073.75	52.5	5	0	46.25	46.25	27.5	58.75	68.75	72.5	25	7.5	0	0	0	0	0	0	0	0	0	0
Austria	Herring nei, fillets, frozen	Imports	Herring	Frozen	Fillets	Herring	Fish	1.25	754.1	0	0	0	0	0	0	0	0	0	0	0	0	0	0	0	0	0	0	0	43.75	53.75	43.75	16.25	32.5	38.75	32.5	23.75	43.75	135	47.5	25	43.75	17.5	15	17.5	18.75	17.5	23.75	17.5	16.25
Austria	Herring, salted or in brine	Imports	Herring	Salted	NA	Herring	Fish	2.82	11663.6	0	0	0	0	0	0	0	0	0	0	0	0	287.64	126.9	180.48	138.18	118.44	194.58	211.5	19.74	5.64	62.04	45.12	33.84	8.46	2.82	5.64	11.28	197.4	14.1	42.3	14.1	118.44	166.38	1133.64	1534.08	1023.66	1201.32	1632.78	1192.86
Austria	Herrings nei, frozen	Exports	Herring	Frozen	NA	Herring	Fish	1	464	0	0	0	0	0	6	1	0	1	0	0	0	0	0	0	0	0	0	0	0	0	415	2	0	4	0	0	21	0	14	0	0	0	0	0	0	0	0	0	0
Austria	Herrings nei, frozen	Imports	Herring	Frozen	NA	Herring	Fish	1	1187.11	0	0	0	0	0	0	0	0	0	0	0	0	26	128	36	61	64	37	34	4	10	257	72	0	8	90	10	21	3	14	74	193	11	9	7	1	6	0	2	6
Austria	Herrings nei, smoked	Imports	Herring	Smoked	NA	Herring	Fish	2.5	3149.62	0	0	0	0	0	0	0	0	0	0	0	0	60	102.5	95	105	145	132.5	132.5	140	137.5	140	157.5	127.5	117.5	115	87.5	100	87.5	60	55	90	105	97.5	180	97.5	70	52.5	90	80
Austria	Herrings prepared or preserved, not minced, nei	Exports	Herring	Prepared or preserved	NA	Herring	Fish	2.66	2609.46	0	0	0	0	0	0	0	0	0	0	0	0	5.32	2.66	15.96	21.28	13.3	957.6	1593.34	0	0	0	0	0	0	0	0	0	0	0	0	0	0	0	0	0	0	0	0	0
Austria	Herrings prepared or preserved, not minced, nei	Imports	Herring	Prepared or preserved	NA	Herring	Fish	2.66	22429.1	0	0	0	0	0	0	0	0	0	0	0	0	1252.86	1625.26	1835.4	1768.9	1675.8	6852.16	7418.74	0	0	0	0	0	0	0	0	0	0	0	0	0	0	0	0	0	0	0	0	0
Austria	Herrings, fresh or chilled, nei	Exports	Herring	Live, fresh or chilled	NA	Herring	Fish	1	445.13	0	0	0	0	0	0	0	0	0	0	0	0	0	0	0	0	0	0	0	0	0	0	70	85	192	68	30	0	0	0	0	0	0	0	0	0	0	0	0	0
Austria	Herrings, fresh or chilled, nei	Imports	Herring	Live, fresh or chilled	NA	Herring	Fish	1	51685.7	2274	2469	2665	2651	2381	2904	3123	3389	3273	3411	3162	3243	987	1355	1464	1457	1736	1820	1677	124	781	549	831	595	543	759	431	545	445	270	308	3	4	5	7	8	4	2	5	6
Austria	Herrings, not minced, in oil, prepared or preserved	Imports	Herring	Prepared or preserved	NA	Herring	Fish	2.66	2135.98	0	0	0	0	0	0	0	0	0	0	0	0	250.04	372.4	353.78	311.22	266	255.36	327.18	0	0	0	0	0	0	0	0	0	0	0	0	0	0	0	0	0	0	0	0	0
Austria	Herrings, not minced, prep. or pres. in airtight containers, nei	Exports	Herring	Prepared or preserved	NA	Herring	Fish	2.66	12038.1	0	0	0	0	0	0	0	0	0	0	0	0	0	0	0	2.66	2.66	31.92	0	202.16	273.98	508.06	1702.4	1877.96	2050.86	853.86	627.76	351.12	582.54	196.84	156.94	194.18	207.48	188.86	279.3	281.96	258.02	202.16	231.42	212.8
Austria	Herrings, not minced, prep. or pres. in airtight containers, nei	Imports	Herring	Prepared or preserved	NA	Herring	Fish	2.66	203741	0	0	0	0	0	0	0	0	0	0	0	0	5.32	7.98	0	0	5.32	5.32	0	10358	9381.82	6687.24	8352.4	9993.62	14364	10275.6	8184.82	4529.98	5351.92	6128.64	7402.78	11645.5	11137.4	7873.6	8075.76	8211.42	8389.64	7445.34	7317.66	6822.9
Austria	Herrings, not minced, prep. or pres., not in airtight containers	Exports	Herring	Prepared or preserved	NA	Herring	Fish	2.66	7251.35	0	0	0	0	0	0	0	0	0	0	0	0	292.6	345.8	460.18	66.5	2.66	0	0	2354.1	2104.06	1008.14	409.64	7.98	23.94	21.28	18.62	7.98	0	23.94	2.66	42.56	2.66	0	26.6	0	0	2.66	2.66	2.66
Austria	Herrings, not minced, prep. or pres., not in airtight containers	Imports	Herring	Prepared or preserved	NA	Herring	Fish	2.66	89747.8	0	0	0	0	0	0	0	0	0	0	0	0	71.82	95.76	220.78	117.04	260.68	452.2	404.32	2215.78	7179.34	8945.58	4966.22	5343.94	2343.46	2404.64	1901.9	3471.3	1734.32	3535.14	2705.22	2835.56	4091.08	4287.92	3811.78	2870.14	2649.36	2598.82	2540.3	3149.44
Austria	Herrings, not minced, smoked, in oil or in tomato sauce, prep. or pres.	Exports	Herring	Prepared or preserved	NA	Herring	Fish	2.66	3120.18	0	0	0	0	0	0	0	0	0	0	0	0	2.66	0	50.54	250.04	1782.2	816.62	218.12	0	0	0	0	0	0	0	0	0	0	0	0	0	0	0	0	0	0	0	0	0
Austria	Herrings, not minced, smoked, in oil or in tomato sauce, prep. or pres.	Imports	Herring	Prepared or preserved	NA	Herring	Fish	2.66	41065.1	0	0	0	0	0	0	0	0	0	0	0	0	4194.82	4950.26	4883.76	5120.5	9903.18	5668.46	6344.1	0	0	0	0	0	0	0	0	0	0	0	0	0	0	0	0	0	0	0	0	0
Austria	Indian mackerels, seerfishes, jacks, crevalles, silver pomfrets, Pacific saury, scads, capelin, Kawakawa, bonitos, marlins, sailfishes, spearfish, fresh or chilled	Imports	Indian mackerels, seerfishes, jacks, crevalles, silver pomfrets, Pacific saury, scads, capelin, Kawakawa, bonitos, marlins, sailfishes, spearfish	Live, fresh or chilled	NA	Indian mackerels and seerfishes and jacks	Fish	1	3258.47	0	0	0	0	0	0	0	0	0	0	0	0	0	0	0	0	0	0	0	0	0	0	0	0	0	0	0	0	0	0	0	0	0	0	0	0	0	0	0	0
Austria	Jack and horse mackerel, frozen	Exports	Jack and horse mackerel	Frozen	NA	Jack and horse mackerel	Fish	1	247.13	0	0	0	0	0	0	0	0	0	0	0	0	0	0	0	0	0	0	0	0	0	0	0	0	0	0	11	22	10	4	0	23	24	8	4	0	47	45	25	12
Austria	Jack and horse mackerel, frozen	Imports	Jack and horse mackerel	Frozen	NA	Jack and horse mackerel	Fish	1	261.13	0	0	0	0	0	0	0	0	0	0	0	0	0	0	0	0	0	0	0	0	0	0	0	0	0	0	11	22	10	4	1	23	24	8	4	0	54	50	26	12
Austria	Jack and horse mackerels, fresh or chilled	Imports	Jack and horse mackerel	Live, fresh or chilled	NA	Jack and horse mackerel	Fish	1	136.82	0	0	0	0	0	0	0	0	0	0	0	0	0	0	0	0	0	0	0	0	0	2	0	1	1	1	0	0	0	0	0	0	1	7	0	1	31	24	27	20
Austria	Lemon sole, frozen	Imports	Lemon sole	Frozen	NA	Lemon sole	Fish	1	306	0	0	0	0	0	0	0	0	0	0	0	0	0	0	0	0	0	0	0	0	0	0	0	0	0	20	0	3	81	107	82	12	1	0	0	0	0	0	0	0
Austria	Mackerel fillets, frozen	Imports	Mackerel	Frozen	Fillets	Mackerel	Fish	1.25	3735.97	0	0	0	0	0	0	0	0	0	0	0	0	0	0	0	0	0	0	0	388.75	415	137.5	33.75	18.75	196.25	560	345	296.25	251.25	180	208.75	171.25	46.25	16.25	21.25	28.75	37.5	73.75	53.75	76.25
Austria	Mackerel prepared or preserved, not minced, nei	Exports	Mackerel	Prepared or preserved	NA	Mackerel	Fish	2.66	1859.1	0	0	0	0	0	0	0	0	0	0	0	0	0	0	0	2.66	0	0	29.26	10.64	53.2	2.66	0	0	0	2.66	0	0	7.98	21.28	109.06	196.84	228.76	170.24	223.44	180.88	172.9	210.14	164.92	7.98
Austria	Mackerel prepared or preserved, not minced, nei	Imports	Mackerel	Prepared or preserved	NA	Mackerel	Fish	2.66	86235.6	0	0	0	0	0	0	0	0	0	0	0	0	3636.22	3335.64	4351.76	3864.98	6391.98	3676.12	3053.68	1760.92	1933.82	1843.38	2026.92	2298.24	1742.3	1944.46	2675.96	2146.62	2431.24	2665.32	2681.28	2468.48	2181.2	2186.52	2101.4	2955.26	2338.14	2481.78	2976.54	2883.44
Austria	Mackerels nei, frozen	Exports	Mackerel	Frozen	NA	Mackerel	Fish	1	426.31	0	0	0	0	0	0	0	0	0	0	0	0	8	14	0	0	0	4	21	0	0	0	19	0	18	10	14	52	48	21	3	1	10	1	3	48	3	24	19	7
Austria	Mackerels nei, frozen	Imports	Mackerel	Frozen	NA	Mackerel	Fish	1	21396.5	0	0	0	0	0	0	0	0	0	0	0	0	965	996	1154	953	1046	881	907	285	714	1069	1429	890	701	943	617	651	585	601	859	485	286	390	403	482	324	251	380	366
Austria	Mackerels, fillets, prepared or preserved	Exports	Mackerel	Prepared or preserved	Fillets	Mackerel	Fish	2.66	946.295	0	0	0	0	0	0	0	0	0	0	0	0	0	0	0	2.66	0	21.28	21.28	0	0	13.3	0	5.32	13.3	0	2.66	0	0	0	0	15.96	13.3	151.62	122.36	53.2	45.22	47.88	23.94	95.76
Austria	Mackerels, fillets, prepared or preserved	Imports	Mackerel	Prepared or preserved	Fillets	Mackerel	Fish	2.66	19135.9	0	0	0	0	0	0	0	0	0	0	0	0	122.36	125.02	218.12	127.68	162.26	207.48	151.62	361.76	465.5	329.84	300.58	633.08	662.34	744.8	558.6	263.34	601.16	696.92	667.66	755.44	798	829.92	478.8	790.02	986.86	1175.72	989.52	1050.7
Austria	Mackerels, nei, fresh or chilled	Imports	Mackerel	Live, fresh or chilled	NA	Mackerel	Fish	1	888.2	0	0	0	0	0	0	0	0	0	0	0	0	38	13	20	2	15	7	68	9	2	10	14	23	66	8	25	25	13	5	16	9	29	22	20	16	13	44	14	27
Austria	Mackerels, smoked	Imports	Mackerel	Smoked	NA	Mackerel	Fish	2.5	8269.52	0	0	0	0	0	0	0	0	0	0	0	0	0	0	0	0	0	0	0	562.5	472.5	357.5	330	215	162.5	127.5	67.5	90	145	65	45	590	860	257.5	297.5	127.5	222.5	342.5	392.5	377.5
Austria	Marine fish fillets, frozen, nei	Exports	Marine fish	Frozen	Fillets	Marine fish	Fish	1.25	3663.05	0	0	0	0	0	0	0	0	0	0	0	0	7.5	25	17.5	41.25	52.5	33.75	48.75	6.25	11.25	15	12.5	8.75	0	0	3.75	6.25	23.75	18.75	21.25	26.25	68.75	165	227.5	242.5	292.5	325	422.5	307.5
Austria	Marine fish fillets, frozen, nei	Imports	Marine fish	Frozen	Fillets	Marine fish	Fish	1.25	70578.7	0	0	0	0	0	0	0	0	0	0	0	0	6386.25	7597.5	7016.25	7440	7178.75	6996.25	7176.25	602.5	783.75	728.75	686.25	903.75	525	606.25	671.25	655	516.25	582.5	623.75	1110	1215	987.5	1216.25	1335	787.5	931.25	893.75	685
Austria	Marine fish meat,whether or not minced nei, fresh or chilled	Exports	Marine fish	Live, fresh or chilled	Meat	Marine fish	Fish	1.25	754.388	0	0	0	0	0	0	0	0	0	0	0	0	0	0	0	0	0	0	0	2.5	332.5	117.5	0	83.75	0	0	31.25	0	0	6.25	0	0	18.75	3.75	5	3.75	60	30	12.5	0
Austria	Marine fish meat,whether or not minced nei, fresh or chilled	Imports	Marine fish	Live, fresh or chilled	Meat	Marine fish	Fish	1.25	3413.1	0	0	0	0	0	0	0	0	0	0	0	0	0	0	0	0	0	0	0	120	211.25	421.25	28.75	271.25	246.25	531.25	242.5	101.25	76.25	145	136.25	223.75	95	22.5	40	28.75	88.75	50	81.25	67.5
Austria	Marine fish nei, prepared or preserved, not minced	Imports	Marine fish	Prepared or preserved	NA	Marine fish	Fish	2.66	146922	12549.9	10945.9	11376.8	12914.3	11517.8	12496.7	13180.3	13321.3	11892.9	11837	12079.1	12810.6	0	0	0	0	0	0	0	0	0	0	0	0	0	0	0	0	0	0	0	0	0	0	0	0	0	0	0	0
Austria	Marine fish, fresh or chilled, nei	Exports	Marine fish	Live, fresh or chilled	NA	Marine fish	Fish	1	487.13	0	0	0	0	0	0	0	0	0	0	0	0	0	0	0	0	0	0	0	0	0	1	0	1	6	10	14	59	7	3	0	3	21	4	8	22	31	64	55	80
Austria	Marine fish, fresh or chilled, nei	Imports	Marine fish	Live, fresh or chilled	NA	Marine fish	Fish	1	15907.7	0	0	0	0	0	0	0	0	0	0	0	0	148	171	167	162	154	155	185	177	124	170	125	407	230	275	214	324	215	196	330	230	213	320	387	802	765	1492	1826	2148
Austria	Marine fish, frozen, nei	Exports	Marine fish	Frozen	NA	Marine fish	Fish	1	1171.18	2	1	0	0	5	5	2	7	30	7	34	55	0	0	0	0	1	0	0	1	0	0	0	0	1	0	15	6	2	18	27	21	17	25	118	99	38	114	21	14
Austria	Marine fish, frozen, nei	Imports	Marine fish	Frozen	NA	Marine fish	Fish	1	110002	8549	7996	7531	8585	9309	8339	7967	8286	8713	8449	8913	9285	53	49	52	79	114	109	103	67	54	45	54	43	31	72	65	90	154	285	493	294	378	606	606	528	394	476	388	337
Austria	Miscellaneous marine fish fillets, fresh or chilled, nei	Exports	Marine fish	Live, fresh or chilled	Fillets	Marine fish	Fish	1.25	2669.66	0	0	0	0	0	0	0	0	0	0	0	0	0	0	0	0	0	0	0	0	0	6.25	0	1.25	3.75	3.75	5	8.75	22.5	0	0	1.25	20	68.75	152.5	186.25	657.5	313.75	326.25	537.5
Austria	Miscellaneous marine fish fillets, fresh or chilled, nei	Imports	Marine fish	Live, fresh or chilled	Fillets	Marine fish	Fish	1.25	15255	0	0	0	0	0	0	0	0	0	0	0	0	0	0	0	0	0	0	0	532.5	502.5	481.25	482.5	403.75	537.5	600	577.5	511.25	511.25	535	681.25	572.5	632.5	697.5	586.25	743.75	645	438.75	375	501.25
Austria	Miscellaneous marine fish meat, minced or not, frozen, nei	Exports	Marine fish	Frozen	Meat	Marine fish	Fish	1.25	411.375	0	0	0	0	0	0	0	0	0	0	0	0	0	0	0	0	0	0	0	1.25	0	0	0	0	2.5	17.5	11.25	13.75	30	41.25	26.25	11.25	0	22.5	32.5	20	60	38.75	12.5	12.5
Austria	Miscellaneous marine fish meat, minced or not, frozen, nei	Imports	Marine fish	Frozen	Meat	Marine fish	Fish	1.25	5390.3	0	0	0	0	0	0	0	0	0	0	0	0	0	0	0	0	0	0	0	112.5	128.75	95	90	157.5	226.25	380	376.25	223.75	422.5	338.75	305	106.25	152.5	245	175	131.25	421.25	400	298.75	188.75
Austria	Nile perch fillets, fresh or chilled	Imports	Nile perch	Live, fresh or chilled	Fillets	Nile perch	Fish	1.25	611.138	0	0	0	0	0	0	0	0	0	0	0	0	0	0	0	0	0	0	0	0	0	0	0	0	0	0	0	0	0	0	0	0	0	0	190	60	67.5	78.75	52.5	50
Austria	Nile perch fillets, frozen	Imports	Nile perch	Frozen	Fillets	Nile perch	Fish	1.25	177.65	0	0	0	0	0	0	0	0	0	0	0	0	0	0	0	0	0	0	0	0	0	0	0	0	0	0	0	0	0	0	0	0	0	0	8.75	10	21.25	16.25	15	12.5
Austria	Pacific cod fillets, frozen	Imports	Pacific cod	Frozen	Fillets	Pacific cod	Fish	1.25	2961.51	0	0	0	0	0	0	0	0	0	0	0	0	0	0	0	0	0	0	0	11.25	27.5	16.25	28.75	203.75	218.75	98.75	61.25	37.5	70	18.75	130	230	128.75	108.75	92.5	111.25	115	112.5	143.75	186.25
Austria	Pacific cod, frozen	Imports	Pacific cod	Frozen	NA	Pacific cod	Fish	1	222.92	0	0	0	0	0	0	0	0	0	0	0	0	0	0	0	0	0	0	0	9	24	23	33	17	0	1	1	0	0	0	0	0	0	0	0	0	1	1	3	10
Austria	Pacific salmons, fresh or chilled	Imports	Pacific salmons	Live, fresh or chilled	NA	Pacific salmons	Fish	1	2012.43	0	0	0	0	0	0	0	0	0	0	0	0	0	0	0	0	0	0	0	0	0	0	0	0	0	0	0	0	0	0	0	0	0	0	0	0	784	173	249	341
Austria	Pacific salmons, frozen, nei	Exports	Pacific salmons	Frozen	NA	Pacific salmons	Fish	1	186.1	0	0	0	0	0	0	0	0	0	0	0	0	0	0	0	0	0	0	0	0	0	12	0	1	1	0	0	13	14	19	19	27	25	22	13	3	1	5	7	4
Austria	Pacific salmons, frozen, nei	Imports	Pacific salmons	Frozen	NA	Pacific salmons	Fish	1	2673.49	0	0	0	0	0	0	0	0	0	0	0	0	1	10	15	12	20	6	19	16	44	280	343	411	137	66	8	26	29	81	61	138	123	133	85	38	61	93	120	74
Austria	Miscellaneous pelagic fish nei, minced, prepared or preserved	Exports	Pelagic fish	Prepared or preserved	Minced	Pelagic fish	Fish	2.66	920.812	0	0	0	0	0	0	0	0	0	0	0	0	0	0	0	0	0	0	0	71.82	0	29.26	0	0	0	7.98	2.66	0	5.32	0	50.54	37.24	66.5	55.86	79.8	29.26	37.24	39.9	45.22	74.48
Austria	Miscellaneous pelagic fish nei, minced, prepared or preserved	Imports	Pelagic fish	Prepared or preserved	Minced	Pelagic fish	Fish	2.66	3557.38	0	0	0	0	0	0	0	0	0	0	0	0	0	0	0	0	0	0	0	130.34	93.1	47.88	21.28	37.24	58.52	39.9	31.92	18.62	202.16	164.92	82.46	50.54	98.42	111.72	284.62	316.54	316.54	79.8	127.68	242.06
Austria	Pilchards(Sardinops spp.) and Sardinellas, fresh or chilled	Imports	Pilchards (Sardinops spp.) and Sardinellas	Live, fresh or chilled	NA	Pilchards (Sardinops spp.) and Sardinellas	Fish	1	180.44	0	0	0	0	0	0	0	0	0	0	0	0	0	0	0	0	0	0	0	1	2	25	5	4	21	7	0	0	0	69	22	0	0	0	4	5	4	4	4	2
Austria	Pilchards(Sardinops spp.) and Sardinellas, frozen	Exports	Pilchards (Sardinops spp.) and Sardinellas	Frozen	NA	Pilchards (Sardinops spp.) and Sardinellas	Fish	1	357	0	0	0	0	0	0	0	0	0	0	0	0	0	0	0	0	0	0	0	0	4	11	16	0	15	74	170	8	18	5	17	19	0	0	0	0	0	0	0	0
Austria	Pilchards(Sardinops spp.) and Sardinellas, frozen	Imports	Pilchards (Sardinops spp.) and Sardinellas	Frozen	NA	Pilchards (Sardinops spp.) and Sardinellas	Fish	1	524.1	0	0	0	0	0	0	0	0	0	0	0	0	0	0	0	0	0	0	0	22	17	68	1	10	52	91	173	0	6	26	18	19	1	0	3	2	7	4	2	1
Austria	Polar cod (Boreogadus saida), fresh or chilled	Imports	Polar cod	Live, fresh or chilled	NA	Polar cod	Fish	1	413.63	0	0	0	0	0	0	0	0	0	0	0	0	0	0	0	0	0	0	0	0	0	0	0	0	0	0	0	3	1	0	0	1	1	3	2	2	54	60	12	36
Austria	Polar cod, frozen	Imports	Polar cod	Frozen	NA	Polar cod	Fish	1	1292.74	0	0	0	0	0	0	0	0	0	0	0	0	0	0	0	0	0	0	0	0	0	0	0	0	0	0	0	0	0	0	0	7	12	13	17	19	84	223	233	203
Austria	Redfish fillets, fresh or chilled	Exports	Redfish	Live, fresh or chilled	Fillets	Redfish	Fish	1.25	1104.3	0	0	0	0	0	0	0	0	0	0	0	0	0	0	0	0	0	0	0	0	0	0	0	138.75	0	0	780	122.5	0	0	0	0	0	1.25	3.75	5	0	41.25	8.75	1.25
Austria	Redfish fillets, fresh or chilled	Imports	Redfish	Live, fresh or chilled	Fillets	Redfish	Fish	1.25	2882.39	0	0	0	0	0	0	0	0	0	0	0	0	0	0	0	0	0	0	0	97.5	75	68.75	48.75	175	37.5	46.25	846.25	196.25	36.25	56.25	65	100	127.5	146.25	107.5	75	30	53.75	77.5	93.75
Austria	Redfish nei, fillets, frozen	Imports	Redfish	Frozen	Fillets	Redfish	Fish	1.25	1904.86	0	0	0	0	0	0	0	0	0	0	0	0	0	0	0	0	0	0	0	33.75	46.25	31.25	61.25	63.75	51.25	71.25	30	55	77.5	77.5	43.75	76.25	52.5	45	63.75	135	130	66.25	110	158.75
Austria	Redfish, frozen, nei	Imports	Redfish	Frozen	NA	Redfish	Fish	1	253.57	0	0	0	0	0	0	0	0	0	0	0	0	0	0	0	0	0	0	0	0	0	0	0	0	0	6	4	4	4	5	10	38	7	13	23	18	39	20	30	3
Austria	Redfishes, fresh or chilled, nei	Imports	Redfish	Live, fresh or chilled	NA	Redfish	Fish	1	514.21	0	0	0	0	0	0	0	0	0	0	0	0	0	0	0	0	0	0	0	15	14	17	34	14	0	1	4	1	5	95	107	70	56	11	11	15	5	4	4	4
Austria	Saithe (=Pollock) fillets, fresh or chilled	Imports	Saithe (=Pollock)	Live, fresh or chilled	Fillets	Saithe (=Pollock)	Fish	1.25	1404.97	0	0	0	0	0	0	0	0	0	0	0	0	0	0	0	0	0	0	0	118.75	181.25	130	137.5	102.5	18.75	27.5	70	115	118.75	47.5	32.5	33.75	30	18.75	38.75	25	23.75	21.25	17.5	7.5
Austria	Saithe (=Pollock) fillets, frozen	Exports	Saithe (=Pollock)	Frozen	Fillets	Saithe (=Pollock)	Fish	1.25	621.663	0	0	0	0	0	0	0	0	0	0	0	0	0	0	0	0	0	0	0	0	0	0	0	0	0	0	0	0	25	1.25	8.75	0	1.25	2.5	2.5	5	6.25	13.75	75	121.25
Austria	Saithe (=Pollock) fillets, frozen	Imports	Saithe (=Pollock)	Frozen	Fillets	Saithe (=Pollock)	Fish	1.25	6762.29	0	0	0	0	0	0	0	0	0	0	0	0	0	0	0	0	0	0	0	190	262.5	296.25	330	286.25	148.75	252.5	391.25	285	282.5	202.5	307.5	398.75	238.75	191.25	171.25	330	166.25	202.5	381.25	322.5
Austria	Saithe (=Pollock), fresh or chilled	Imports	Saithe (=Pollock)	Live, fresh or chilled	NA	Saithe (=Pollock)	Fish	1	260.15	0	0	0	0	0	0	0	0	0	0	0	0	2	0	0	0	1	4	0	0	0	0	0	0	0	0	0	11	10	9	12	24	22	19	27	34	10	12	20	21
Austria	Saithe (=Pollock), frozen	Imports	Saithe (=Pollock)	Frozen	NA	Saithe (=Pollock)	Fish	1	210.29	0	0	0	0	0	0	0	0	0	0	0	0	0	0	0	0	1	0	0	0	0	0	0	0	0	0	11	0	0	0	2	0	0	0	0	0	16	19	26	25
Austria	Saithe (=Pollock), not minced, prepared or preserved	Imports	Saithe (=Pollock)	Prepared or preserved	NA	Saithe (=Pollock)	Fish	2.66	9363.49	0	0	0	0	0	0	0	0	0	0	0	0	465.5	494.76	399	348.46	311.22	396.34	614.46	760.76	508.06	460.18	417.62	146.3	212.8	220.78	234.08	260.68	268.66	250.04	260.68	207.48	130.34	151.62	138.32	130.34	154.28	159.6	303.24	244.72
Austria	Salmon fillets, dried, salted or in brine	Imports	Salmon	Dried	Fillets	Salmon	Fish	2.82	3164.46	0	0	0	0	0	0	0	0	0	0	0	0	0	0	0	0	0	0	0	5.64	0	2.82	67.68	33.84	11.28	11.28	22.56	67.68	70.5	282	234.06	64.86	28.2	78.96	166.38	242.52	428.64	476.58	372.24	197.4
Austria	Salmon fillets, fresh or chilled	Exports	Salmon	Live, fresh or chilled	Fillets	Salmon	Fish	1.25	558.325	0	0	0	0	0	0	0	0	0	0	0	0	0	3.75	0	1.25	1.25	1.25	3.75	0	0	1.25	0	0	0	0	2.5	3.75	2.5	1.25	1.25	6.25	0	2.5	11.25	12.5	23.75	25	36.25	55
Austria	Salmon fillets, fresh or chilled	Imports	Salmon	Live, fresh or chilled	Fillets	Salmon	Fish	1.25	19898.8	0	0	0	0	0	0	0	0	0	0	0	0	13.75	17.5	65	113.75	170	173.75	191.25	276.25	152.5	206.25	366.25	161.25	218.75	678.75	455	503.75	595	311.25	496.25	357.5	510	675	738.75	1005	932.5	965	1293.75	1498.75
Austria	Salmon fillets, frozen	Exports	Salmon	Frozen	Fillets	Salmon	Fish	1.25	1094.3	0	0	0	0	0	0	0	0	0	0	0	0	0	0	0	0	0	1.25	6.25	0	0	0	0	3.75	1.25	0	3.75	5	3.75	2.5	7.5	42.5	106.25	133.75	115	192.5	111.25	37.5	13.75	48.75
Austria	Salmon fillets, frozen	Imports	Salmon	Frozen	Fillets	Salmon	Fish	1.25	32795.1	0	0	0	0	0	0	0	0	0	0	0	0	10	23.75	28.75	40	47.5	80	110	137.5	212.5	206.25	316.25	573.75	776.25	638.75	522.5	780	797.5	1123.75	1510	2037.5	2987.5	3090	1830	1532.5	1623.75	1347.5	1721.25	1558.75
Austria	Salmon minced, prepared or preserved	Exports	Salmon	Prepared or preserved	Minced	Salmon	Fish	2.66	573.363	0	0	0	0	0	0	0	0	0	0	0	0	0	0	0	0	0	0	0	5.32	0	2.66	5.32	5.32	5.32	13.3	42.56	47.88	29.26	2.66	23.94	15.96	21.28	23.94	31.92	50.54	34.58	26.6	21.28	21.28
Austria	Salmon minced, prepared or preserved	Imports	Salmon	Prepared or preserved	Minced	Salmon	Fish	2.66	14179.1	0	0	0	0	0	0	0	0	0	0	0	0	0	0	0	0	0	0	0	111.72	335.16	284.62	372.4	85.12	119.7	135.66	175.56	103.74	175.56	771.4	603.82	425.6	534.66	758.1	938.98	869.82	747.46	683.62	311.22	273.98
Austria	Salmon nei, not minced, in oil, prepared or preserved	Imports	Salmon	Prepared or preserved	Heads-off and gutted	Salmon	Fish	2.66	2064.16	0	0	0	0	0	0	0	0	0	0	0	0	438.9	266	372.4	252.7	343.14	202.16	188.86	0	0	0	0	0	0	0	0	0	0	0	0	0	0	0	0	0	0	0	0	0
Austria	Salmon nei, not minced, prepared or preserved	Exports	Salmon	Prepared or preserved	NA	Salmon	Fish	2.66	1899.35	0	0	0	0	0	0	0	0	0	0	0	0	0	0	0	0	5.32	13.3	10.64	21.28	34.58	37.24	29.26	42.56	55.86	37.24	23.94	34.58	23.94	37.24	135.66	183.54	29.26	21.28	29.26	140.98	55.86	98.42	138.32	146.3
Austria	Salmon nei, not minced, prepared or preserved	Imports	Salmon	Prepared or preserved	NA	Salmon	Fish	2.66	53982	0	0	0	0	0	0	0	0	0	0	0	0	731.5	143.64	151.62	98.42	82.46	119.7	297.92	867.16	569.24	510.72	659.68	840.56	1869.98	1726.34	1079.96	1888.6	4370.38	9892.54	5343.94	2920.68	1518.86	1481.62	1300.74	1276.8	1348.62	1524.18	1447.04	1542.8
Austria	Salmons, fresh or chilled, nei	Exports	Salmon	Live, fresh or chilled	NA	Salmon	Fish	1	811	0	0	0	0	0	0	0	0	0	0	0	0	0	0	0	1	1	2	1	1	1	8	2	0	5	6	7	0	0	6	25	70	139	253	121	162	0	0	0	0
Austria	Salmons, fresh or chilled, nei	Imports	Salmon	Live, fresh or chilled	NA	Salmon	Fish	1	18835	0	0	0	0	0	0	0	0	0	0	0	0	193	323	333	401	444	415	507	439	643	555	771	554	426	455	538	929	801	923	1138	1128	1523	1732	1799	1865	0	0	0	0
Austria	Salmons, live	Imports	Salmon	Live, fresh or chilled	NA	Salmon	Fish	1	687.28	0	0	0	0	0	0	0	0	0	0	0	0	0	0	0	0	0	0	0	0	2	2	20	15	4	17	22	14	11	18	6	17	29	40	23	52	58	47	40	46
Austria	Salmons, meat. frozen	Exports	Salmon	Frozen	Meat	Salmon	Fish	1.25	372.5	0	0	0	0	0	0	0	0	0	0	0	0	0	0	0	0	0	1.25	0	0	1.25	3.75	2.5	0	1.25	0	90	138.75	132.5	0	1.25	0	0	0	0	0	0	0	0	0
Austria	Salmons, meat. frozen	Imports	Salmon	Frozen	Meat	Salmon	Fish	1.25	1368.75	0	0	0	0	0	0	0	0	0	0	0	0	12.5	6.25	6.25	8.75	5	16.25	11.25	51.25	42.5	42.5	21.25	31.25	58.75	105	193.75	258.75	251.25	123.75	122.5	0	0	0	0	0	0	0	0	0
Austria	Salmons, salted or in brine	Imports	Salmon	Salted	NA	Salmon	Fish	2.82	1771.92	0	0	0	0	0	0	0	0	0	0	0	0	0	0	0	0	0	0	0	0	0	5.64	5.64	0	0	0	0	2.82	0	62.04	0	16.92	25.38	45.12	64.86	53.58	56.4	87.42	126.9	344.04
Austria	Salmons, smoked	Exports	Salmon	Smoked	NA	Salmon	Fish	2.5	11508.6	0	0	0	0	0	0	0	0	0	0	0	0	0	0	2.5	2.5	7.5	7.5	7.5	2.5	0	7.5	5	15	27.5	17.5	22.5	27.5	27.5	57.5	77.5	207.5	62.5	62.5	115	132.5	1335	1280	1055	987.5
Austria	Salmons, smoked	Imports	Salmon	Smoked	NA	Salmon	Fish	2.5	124683	0	0	0	0	0	0	0	0	0	0	0	0	552.5	800	1065	1100	1262.5	1282.5	1595	2560	2612.5	2120	2307.5	2125	2345	3625	2440	2945	4462.5	5107.5	3695	6192.5	5785	4352.5	5137.5	5862.5	5880	5685	6155	6202.5
Austria	Salmonoids nei, minced, prepared or preserved	Imports	Salmonids	Prepared or preserved	Minced	Salmonids	Fish	2.66	963.851	0	0	0	0	0	0	0	0	0	0	0	0	0	0	0	0	0	0	0	244.72	287.28	220.78	7.98	82.46	2.66	2.66	0	0	2.66	2.66	5.32	15.96	18.62	15.96	10.64	5.32	5.32	7.98	5.32	5.32
Austria	Salmonoids, fresh or chilled, nei	Exports	Salmonids	Live, fresh or chilled	NA	Salmonids	Fish	1	104.68	0	0	0	0	0	0	0	0	0	0	0	0	2	0	0	0	0	0	0	1	0	0	4	9	19	18	15	0	0	0	0	0	0	0	4	1	3	2	1	1
Austria	Salmonoids, fresh or chilled, nei	Imports	Salmonids	Live, fresh or chilled	NA	Salmonids	Fish	1	1355.87	0	0	0	0	0	0	0	0	0	0	0	0	35	5	5	13	34	94	139	87	90	50	25	15	16	4	5	11	10	24	37	60	35	18	24	63	72	71	76	73
Austria	Salmonoids, frozen	Imports	Salmonids	Frozen	NA	Salmonids	Fish	1	537.72	0	0	0	0	0	0	0	0	0	0	0	0	1	1	1	5	0	9	10	21	25	31	32	18	1	4	8	7	7	5	29	3	2	0	4	9	23	59	68	21
Austria	Salmonoids, not minced, prepared or preserved	Exports	Salmonids	Prepared or preserved	NA	Salmonids	Fish	2.66	931.08	0	0	0	0	0	0	0	0	0	0	0	0	0	0	0	0	0	0	0	2.66	0	0	0	0	0	0	0	0	7.98	0	7.98	0	0	0	0	0	2.66	0	0	805.98
Austria	Salmonoids, not minced, prepared or preserved	Imports	Salmonids	Prepared or preserved	NA	Salmonids	Fish	2.66	5771.16	0	0	0	0	0	0	0	0	0	0	0	0	0	0	0	0	0	0	0	26.6	18.62	21.28	13.3	2.66	5.32	7.98	438.9	183.54	130.34	109.06	175.56	5.32	13.3	31.92	7.98	0	7.98	15.96	7.98	805.98
Austria	Saltwater fish nei, live	Imports	Saltwater fish	Live, fresh or chilled	NA	Saltwater fish	Fish	1	700.26	0	0	0	0	0	0	0	0	0	0	0	0	7	1	2	2	1	3	5	1	0	10	5	13	11	9	10	9	4	15	17	6	97	6	3	0	4	6	10	121
Austria	Sardines, sardinellas, brisling or sprats, fresh or chilled	Imports	Sardine, sardinella, sprat	Live, fresh or chilled	NA	Sardine and sardinella and sprat	Fish	1	111	0	0	0	0	0	0	0	0	0	0	0	0	26	38	13	1	32	0	1	0	0	0	0	0	0	0	0	0	0	0	0	0	0	0	0	0	0	0	0	0
Austria	Sardines, sardinellas, brisling or sprats, frozen	Imports	Sardine, sardinella, sprat	Frozen	NA	Sardine and sardinella and sprat	Fish	1	384	0	0	0	0	0	0	0	0	0	0	0	0	36	38	42	60	64	67	77	0	0	0	0	0	0	0	0	0	0	0	0	0	0	0	0	0	0	0	0	0
Austria	Sardines, sardinellas, brisling or sprats, prep. or pres., not minced, nei	Imports	Sardine, sardinella, sprat	Prepared or preserved	NA	Sardine and sardinella and sprat	Fish	2.66	24030.6	0	0	0	0	0	0	0	0	0	0	0	0	1337.98	1659.84	1242.22	1572.06	1532.16	1372.56	1377.88	71.82	281.96	119.7	135.66	247.38	247.38	159.6	795.34	2175.88	2641.38	3362.24	1239.56	151.62	172.9	231.42	90.44	183.54	263.34	236.74	191.52	188.86
Austria	Seabass, fresh or chilled	Exports	Seabass	Live, fresh or chilled	NA	Seabass	Fish	1	3323.98	0	0	0	0	0	0	0	0	0	0	0	0	0	0	0	0	0	0	0	0	0	0	0	0	114	0	26	360	110	8	0	0	191	320	346	934	478	61	1	5
Austria	Seabass, fresh or chilled	Imports	Seabass	Live, fresh or chilled	NA	Seabass	Fish	1	6671.32	0	0	0	0	0	0	0	0	0	0	0	0	0	0	0	0	0	0	0	0	17	18	32	38	157	54	93	440	204	118	129	145	335	462	522	1103	648	194	206	183
Austria	Seabass, frozen	Exports	Seabass	Frozen	NA	Seabass	Fish	1	302.36	0	0	0	0	0	0	0	0	0	0	0	0	0	0	0	0	0	0	0	0	0	0	0	0	0	0	0	0	0	4	0	0	35	84	10	7	32	24	12	24
Austria	Seabass, frozen	Imports	Seabass	Frozen	NA	Seabass	Fish	1	702.86	0	0	0	0	0	0	0	0	0	0	0	0	2	3	2	2	1	1	1	0	0	0	0	0	0	0	1	0	0	5	3	14	54	95	24	28	86	71	56	66
Austria	Seabreams nei, fresh or chilled	Exports	Seabreams	Live, fresh or chilled	NA	Seabream	Fish	1	520.05	0	0	0	0	0	0	0	0	0	0	0	0	0	0	0	0	0	0	0	0	0	0	0	0	0	0	8	52	28	0	0	0	0	47	179	201	1	0	0	0
Austria	Seabreams nei, fresh or chilled	Imports	Seabreams	Live, fresh or chilled	NA	Seabream	Fish	1	840.43	0	0	0	0	0	0	0	0	0	0	0	0	0	0	0	0	0	0	0	23	4	7	3	2	3	3	12	56	30	6	3	1	11	66	196	218	28	24	24	30
Austria	Seabreams, frozen	Exports	Seabreams	Frozen	NA	Seabream	Fish	1	310	0	0	0	0	0	0	0	0	0	0	0	0	0	0	0	0	0	0	0	0	0	0	0	0	0	0	0	0	0	0	0	0	17	6	229	58	0	0	0	0
Austria	Seabreams, frozen	Imports	Seabreams	Frozen	NA	Seabream	Fish	1	387.07	0	0	0	0	0	0	0	0	0	0	0	0	0	0	0	0	0	0	0	0	0	0	0	1	0	1	0	0	0	0	0	1	20	9	241	74	11	6	8	7
Austria	Shark fillets nei, frozen	Imports	Shark	Frozen	Fillets	Shark	Fish	1.25	272.5	0	0	0	0	0	0	0	0	0	0	0	0	0	0	0	0	0	0	0	6.25	7.5	13.75	8.75	8.75	7.5	10	10	8.75	17.5	13.75	13.75	10	6.25	6.25	7.5	13.75	18.75	18.75	23.75	18.75
Austria	Skipjack prepared or preserved, not minced, nei	Exports	Skipjack tuna	Prepared or preserved	NA	Skipjack tuna	Fish	2.66	2958.37	0	0	0	0	0	0	0	0	0	0	0	0	0	0	0	0	0	0	0	0	0	0	0	0	0	0	0	0	0	0	0	0	0	0	0	0	0	0	0	667.66
Austria	Skipjack prepared or preserved, not minced, nei	Imports	Skipjack tuna	Prepared or preserved	NA	Skipjack tuna	Fish	2.66	28265.9	0	0	0	0	0	0	0	0	0	0	0	0	0	0	0	0	0	0	0	0	0	0	0	0	0	0	0	0	0	0	0	0	0	0	0	0	0	0	0	6019.58
Austria	Skipjack, prepared or preserved, whole or in pieces, not minced, in oil	Exports	Skipjack tuna	Prepared or preserved	NA	Skipjack tuna	Fish	2.66	7813.38	0	0	0	0	0	0	0	0	0	0	0	0	0	0	0	0	0	0	0	0	0	0	0	0	0	0	0	0	0	0	0	0	0	0	0	0	0	0	0	1814.12
Austria	Skipjack, prepared or preserved, whole or in pieces, not minced, in oil	Imports	Skipjack tuna	Prepared or preserved	NA	Skipjack tuna	Fish	2.66	61831	0	0	0	0	0	0	0	0	0	0	0	0	0	0	0	0	0	0	0	0	0	0	0	0	0	0	0	0	0	0	0	0	0	0	0	0	0	0	0	11504.5
Austria	Sockeye salmon (red salmon)(Oncorhynchus nerka), frozen	Imports	Sockeye salmon	Frozen	NA	Sockeye salmon	Fish	1	297.91	0	0	0	0	0	0	0	0	0	0	0	0	0	0	0	0	0	0	0	0	0	0	0	0	0	0	2	2	0	2	1	2	7	8	2	2	8	13	13	15
Austria	Soles (Solea spp), frozen, nei	Imports	Soles (Solea spp)	Frozen	NA	Soles (Solea spp)	Fish	1	1164.62	0	0	0	0	0	0	0	0	0	0	0	0	0	0	0	0	0	0	0	0	0	0	0	0	0	0	0	0	0	0	0	0	0	0	0	0	124	132	150	228
Austria	Southern hake, fresh or chilled	Imports	Southern hake	Live, fresh or chilled	NA	Southern hake	Fish	1	159.28	0	0	0	0	0	0	0	0	0	0	0	0	0	0	0	0	0	0	0	0	0	0	0	0	0	0	1	0	0	0	0	0	0	2	9	12	15	14	15	22
Austria	Swordfish fillets, fresh or chilled	Imports	Swordfish	Live, fresh or chilled	Fillets	Swordfish	Fish	1.25	283.887	0	0	0	0	0	0	0	0	0	0	0	0	0	0	0	0	0	0	0	0	0	0	0	0	0	0	0	0	0	0	0	86.25	27.5	37.5	28.75	13.75	12.5	7.5	12.5	8.75
Austria	Swordfish fillets, frozen	Imports	Swordfish	Frozen	Fillets	Swordfish	Fish	1.25	1101.9	0	0	0	0	0	0	0	0	0	0	0	0	0	0	0	0	0	0	0	1.25	2.5	2.5	1.25	18.75	5	8.75	7.5	11.25	6.25	6.25	5	831.25	117.5	7.5	5	10	27.5	1.25	3.75	3.75
Austria	Swordfish, fresh or chilled	Imports	Swordfish	Live, fresh or chilled	NA	Swordfish	Fish	1	104.13	0	0	0	0	0	0	0	0	0	0	0	0	0	0	0	0	0	0	0	2	2	2	2	1	2	6	4	4	11	12	4	1	1	2	3	5	2	2	2	4
Austria	Swordfish, meat, fresh or chilled	Imports	Swordfish	Live, fresh or chilled	Meat	Swordfish	Fish	1.25	216.463	0	0	0	0	0	0	0	0	0	0	0	0	0	0	0	0	0	0	0	0	0	0	0	0	0	0	0	0	0	0	0	161.25	18.75	25	6.25	1.25	0	3.75	0	0
Austria	Tilapia fillets, fresh or chilled	Imports	Tilapia	Live, fresh or chilled	Fillets	Tilapia	Fish	1.25	321.538	0	0	0	0	0	0	0	0	0	0	0	0	0	0	0	0	0	0	0	0	0	0	0	0	0	0	0	0	0	0	0	0	0	0	0	0	88.75	55	46.25	61.25
Austria	Tilapia fillets, frozen	Exports	Tilapia	Frozen	Fillets	Tilapia	Fish	1.25	146.562	0	0	0	0	0	0	0	0	0	0	0	0	0	0	0	0	0	0	0	0	0	0	0	0	0	0	0	0	0	0	0	0	0	0	1.25	11.25	15	13.75	17.5	21.25
Austria	Tilapia fillets, frozen	Imports	Tilapia	Frozen	Fillets	Tilapia	Fish	1.25	2503.04	0	0	0	0	0	0	0	0	0	0	0	0	0	0	0	0	0	0	0	0	0	0	0	0	0	0	0	0	0	0	0	0	0	0	53.75	246.25	228.75	288.75	260	310
Austria	Tilapias, fresh or chilled	Imports	Tilapia	Live, fresh or chilled	NA	Tilapia	Fish	1	607.57	0	0	0	0	0	0	0	0	0	0	0	0	0	0	0	0	0	0	0	0	0	0	0	0	0	0	0	0	0	0	0	0	0	0	61	58	83	95	109	91
Austria	Tilapias, frozen	Imports	Tilapia	Frozen	NA	Tilapia	Fish	1	453.77	0	0	0	0	0	0	0	0	0	0	0	0	0	0	0	0	0	0	0	0	0	0	0	0	0	0	0	0	0	0	0	0	0	0	0	0	33	71	72	86
Austria	Meat of tilapias, catfish, carp, eels, nile perch and snakeheads, fresh or chilled	Imports	Tilapias, catfish, carp, eels, Nile perch and snakeheads	Live, fresh or chilled	Meat	Tilapia and catfish and carp	Fish	1.25	456.525	0	0	0	0	0	0	0	0	0	0	0	0	0	0	0	0	0	0	0	0	0	0	0	0	0	0	0	0	0	0	0	0	0	0	0	0	88.75	76.25	91.25	57.5
Austria	Tilapia, catfish, carp, eel, Nile perch and snakeheads, fillets, dried/salted/brine, not smoked	Imports	Tilapias, catfish, carp, eels, Nile perch and snakeheads	Dried	Fillets	Tilapia and catfish and carp	Fish	2.82	2712.19	0	0	0	0	0	0	0	0	0	0	0	0	0	0	0	0	0	0	0	0	0	0	0	0	0	0	0	0	0	0	0	0	0	0	0	0	944.7	916.5	329.94	138.18
Austria	Toothfish (Dissostichus spp.), meat, fresh or chilled	Imports	Toothfish (Dissostichus spp.)	Live, fresh or chilled	Meat	Toothfish (Dissostichus spp.)	Fish	1.25	418.538	0	0	0	0	0	0	0	0	0	0	0	0	0	0	0	0	0	0	0	0	0	0	0	0	0	0	0	0	0	0	0	57.5	77.5	53.75	67.5	38.75	42.5	28.75	13.75	17.5
Austria	Toothfish (Dissostichus spp.), meat, frozen	Imports	Toothfish (Dissostichus spp.)	Frozen	Meat	Toothfish (Dissostichus spp.)	Fish	1.25	642.875	0	0	0	0	0	0	0	0	0	0	0	0	0	0	0	0	0	0	0	0	0	0	0	0	0	0	0	0	0	0	0	161.25	197.5	93.75	162.5	8.75	8.75	6.25	0	1.25
Austria	Trout fillets, fresh and chilled	Exports	Trout	Live, fresh or chilled	Fillets	Trout	Fish	1.25	557.462	0	0	0	0	0	0	0	0	0	0	0	0	0	0	0	0	0	0	0	35	53.75	96.25	101.25	15	18.75	12.5	2.5	2.5	3.75	3.75	5	5	6.25	6.25	2.5	2.5	12.5	12.5	6.25	25
Austria	Trout fillets, fresh and chilled	Imports	Trout	Live, fresh or chilled	Fillets	Trout	Fish	1.25	4327.49	0	0	0	0	0	0	0	0	0	0	0	0	0	0	0	0	0	0	0	16.25	12.5	37.5	27.5	60	36.25	290	215	32.5	80	42.5	47.5	158.75	48.75	100	120	152.5	292.5	296.25	243.75	245
Austria	Trout fillets, frozen	Exports	Trout	Frozen	Fillets	Trout	Fish	1.25	908.562	0	0	0	0	0	0	0	0	0	0	0	0	0	0	0	0	0	0	0	0	1.25	10	11.25	2.5	1.25	15	7.5	2.5	3.75	7.5	10	16.25	61.25	13.75	0	20	41.25	75	93.75	141.25
Austria	Trout fillets, frozen	Imports	Trout	Frozen	Fillets	Trout	Fish	1.25	3048.65	0	0	0	0	0	0	0	0	0	0	0	0	0	0	0	0	0	0	0	27.5	22.5	30	28.75	13.75	28.75	23.75	13.75	1.25	8.75	26.25	36.25	35	62.5	23.75	60	105	271.25	290	310	310
Austria	Trouts and chars live	Exports	Trouts and chars	Live, fresh or chilled	NA	Trout and char	Fish	1	5284.05	82	135	49	38	26	37	58	39	29	21	34	27	38	17	26	10	5	13	9	12	3	5	31	630	618	406	708	221	174	358	440	458	227	135	42	34	23	5	3	5
Austria	Trouts and chars live	Imports	Trouts and chars	Live, fresh or chilled	NA	Trout and char	Fish	1	75999.1	204	195	228	269	322	328	329	451	435	610	666	908	669	795	1161	1263	1191	1184	1502	1381	1488	1799	1604	2428	2011	2200	2261	2148	1594	1623	1877	2028	1962	2103	2084	2739	3545	3817	3983	4166
Austria	Trouts and chars, fresh or chilled	Exports	Trouts and chars	Live, fresh or chilled	NA	Trout and char	Fish	1	1707.62	0	0	0	0	0	0	0	0	0	0	0	0	16	17	23	6	24	17	23	5	2	1	2	5	4	27	40	4	31	15	14	12	14	132	234	135	267	469	70	17
Austria	Trouts and chars, fresh or chilled	Imports	Trouts and chars	Live, fresh or chilled	NA	Trout and char	Fish	1	5537.81	0	0	0	0	0	0	0	0	0	0	0	0	28	27	13	27	34	35	20	52	30	36	58	168	125	135	158	230	265	179	207	241	221	572	338	320	322	531	114	98
Austria	Trouts and chars, frozen	Exports	Trouts and chars	Frozen	NA	Trout and char	Fish	1	8981.54	0	0	0	0	0	0	0	0	0	0	0	0	0	0	0	0	0	0	0	1	26	25	0	19	82	81	37	23	15	49	71	9	20	583	107	115	983	1843	1304	937
Austria	Trouts and chars, frozen	Imports	Trouts and chars	Frozen	NA	Trout and char	Fish	1	14350.3	0	0	0	0	0	0	0	0	0	0	0	0	47	36	37	50	65	45	48	81	73	93	79	100	128	239	198	87	153	322	241	252	247	839	417	532	1280	2142	1592	1188
Austria	Trouts and chars, smoked	Exports	Trouts and chars	Smoked	NA	Trout and char	Fish	2.5	62445.1	0	0	0	0	0	0	0	0	0	0	0	0	0	0	0	0	0	0	0	0	10	10	0	12.5	20	25	27.5	62.5	62.5	80	542.5	492.5	1785	2107.5	3117.5	4947.5	5787.5	6412.5	5717.5	4587.5
Austria	Trouts and chars, smoked	Imports	Trouts and chars	Smoked	NA	Trout and char	Fish	2.5	76479.1	0	0	0	0	0	0	0	0	0	0	0	0	0	0	0	17.5	20	27.5	25	35	50	60	52.5	75	547.5	712.5	392.5	1040	1345	2252.5	1365	1150	2577.5	2912.5	4115	5837.5	6440	7272.5	6737.5	5485
Austria	Tuna loins and fillets, frozen	Exports	Tuna	Frozen	Loins	Tuna	Fish	1.25	310.1	0	0	0	0	0	0	0	0	0	0	0	0	0	0	0	0	0	0	0	0	0	0	0	0	0	0	0	0	0	3.75	5	5	2.5	5	26.25	41.25	32.5	22.5	17.5	31.25
Austria	Tuna loins and fillets, frozen	Imports	Tuna	Frozen	Loins	Tuna	Fish	1.25	2555.89	0	0	0	0	0	0	0	0	0	0	0	0	0	0	0	0	0	0	0	1.25	0	6.25	15	13.75	25	32.5	40	47.5	62.5	82.5	176.25	176.25	76.25	102.5	106.25	75	91.25	121.25	226.25	198.75
Austria	Tuna loins, prepared or preserved	Exports	Tuna	Prepared or preserved	Loins	Tuna	Fish	2.66	4511.15	0	0	0	0	0	0	0	0	0	0	0	0	0	13.3	5.32	23.94	15.96	23.94	66.5	1731.66	1896.58	7.98	7.98	103.74	111.72	7.98	0	0	0	0	45.22	10.64	13.3	10.64	0	0	23.94	21.28	34.58	93.1
Austria	Tuna loins, prepared or preserved	Imports	Tuna	Prepared or preserved	Loins	Tuna	Fish	2.66	76607.5	0	0	0	0	0	0	0	0	0	0	0	0	4577.86	5812.1	5873.28	6376.02	6700.54	7080.92	9956.38	2207.8	2585.52	856.52	758.1	3742.62	1465.66	1678.46	2449.86	4306.54	1718.36	3521.84	1138.48	23.94	18.62	18.62	47.88	101.08	276.64	228.76	542.64	1218.28
Austria	Tunas nei, frozen	Imports	Tuna	Frozen	NA	Tuna	Fish	1	610.67	0	0	0	0	0	0	0	0	0	0	0	0	3	3	2	3	1	5	1	2	8	8	4	7	3	17	0	7	12	27	15	92	93	126	33	77	3	1	10	35
Austria	Tunas prepared or preserved, not minced, in oil	Exports	Tuna	Prepared or preserved	NA	Tuna	Fish	2.66	25084.7	0	0	0	0	0	0	0	0	0	0	0	0	0	0	47.88	26.6	26.6	90.44	226.1	3418.1	133	47.88	23.94	130.34	231.42	252.7	228.76	210.14	351.12	1731.66	989.52	1955.1	2032.24	1537.48	1893.92	1638.56	1736.98	1731.66	2476.46	133
Austria	Tunas prepared or preserved, not minced, in oil	Imports	Tuna	Prepared or preserved	NA	Tuna	Fish	2.66	312740	0	0	0	0	0	0	0	0	0	0	0	0	4604.46	5676.44	6200.46	6995.8	8333.78	8860.46	19298.3	2981.86	5969.04	11480.6	10046.8	8437.52	7506.52	8168.86	9091.88	9927.12	11666.8	12722.8	13531.4	15457.3	16364.3	13433	13536.7	15978.6	17220.8	13544.7	13946.4	4192.16
Austria	Tunas prepared or preserved, not minced, nei	Exports	Tuna	Prepared or preserved	NA	Tuna	Fish	2.66	5728.18	0	0	0	0	0	0	0	0	0	0	0	0	0	0	13.3	21.28	34.58	55.86	39.9	58.52	0	29.26	26.6	172.9	69.16	50.54	82.46	21.28	13.3	327.18	327.18	811.3	513.38	242.06	428.26	497.42	359.1	289.94	585.2	138.32
Austria	Tunas prepared or preserved, not minced, nei	Imports	Tuna	Prepared or preserved	NA	Tuna	Fish	2.66	169072	0	0	0	0	0	0	0	0	0	0	0	0	111.72	252.7	183.54	239.4	223.44	284.62	1183.7	1909.88	2814.28	4974.2	4684.26	3867.64	3782.52	4599.14	4327.82	4327.82	5109.86	5785.5	8477.42	11890.2	12419.5	12262.6	9339.26	14023.5	10562.9	14010.2	10871.4	3745.28
Austria	Tunas, fresh or chilled, nei	Imports	Tuna	Live, fresh or chilled	NA	Tuna	Fish	1	552.92	0	0	0	0	0	0	0	0	0	0	0	0	12	14	11	13	17	15	8	9	11	12	7	14	26	12	2	21	7	28	17	21	1	3	17	26	11	10	18	24
Austria	Tunas, bonitos, billfishes, nei, minced, prepared or preserved	Exports	Tunas, bonitos, billfishes	Prepared or preserved	Minced	Tuna and bonito and billfish	Fish	2.66	976.912	0	0	0	0	0	0	0	0	0	0	0	0	0	0	0	0	0	0	0	7.98	0	13.3	0	23.94	29.26	26.6	0	2.66	7.98	7.98	10.64	5.32	34.58	87.78	58.52	66.5	29.26	47.88	66.5	95.76
Austria	Tunas, bonitos, billfishes, nei, minced, prepared or preserved	Imports	Tunas, bonitos, billfishes	Prepared or preserved	Minced	Tuna and bonito and billfish	Fish	2.66	31377.8	0	0	0	0	0	0	0	0	0	0	0	0	0	0	0	0	0	0	0	348.46	380.38	53.2	164.92	340.48	1292.76	2516.36	2335.48	3833.06	2175.88	3072.3	1260.84	547.96	688.94	1143.8	452.2	734.16	497.42	3761.24	675.64	819.28
Austria	Turbot, fresh or chilled	Imports	Turbot	Live, fresh or chilled	NA	Turbot	Fish	1	565.18	0	0	0	0	0	0	0	0	0	0	0	0	0	0	0	0	0	0	0	0	0	0	0	0	0	0	0	0	0	0	0	0	0	0	0	0	65	75	68	56
Austria	Yellowfin tuna, fresh or chilled	Imports	Yellowfin tuna	Live, fresh or chilled	NA	Yellowfin tuna	Fish	1	750.17	0	0	0	0	0	0	0	0	0	0	0	0	0	0	0	0	0	1	1	0	0	0	0	0	2	13	1	39	16	2	25	49	28	20	13	17	20	34	50	49
Austria	Yellowfin tuna, frozen, nei	Imports	Yellowfin tuna	Frozen	NA	Yellowfin tuna	Fish	1	107.25	0	0	0	0	0	0	0	0	0	0	0	0	1	0	0	0	1	0	0	0	0	0	1	26	34	3	1	0	1	0	0	0	0	0	7	7	5	3	0	0
Azerbaijan	Alaska pollock, frozen	Imports	Alaska pollock	Frozen	NA	Alaska pollock	Fish	1	440	0	0	0	0	0	0	0	0	0	0	0	0	0	0	0	0	0	0	0	0	0	0	0	223	0	0	0	0	0	5	4	0	6	0	0	0	0	5	0	0
Azerbaijan	Atlantic and Danube salmons, fresh or chilled	Imports	Atlantic salmon and Danube salmon	Live, fresh or chilled	NA	Atlantic salmon and Danube salmon	Fish	1	333.44	0	0	0	0	0	0	0	0	0	0	0	0	0	0	0	0	0	0	0	0	0	0	0	0	0	0	0	0	0	0	0	0	0	0	0	0	0	21	110	90
Azerbaijan	Atlantic salmon and Danube salmon, frozen	Imports	Atlantic salmon and Danube salmon	Frozen	NA	Atlantic salmon and Danube salmon	Fish	1	6691.59	0	0	0	0	0	0	0	0	0	0	0	0	0	0	0	0	0	0	0	0	0	0	0	23	0	0	3	0	6	9	0	0	0	85	165	33	48	548	1020	900
Azerbaijan	Blue whiting (Micromesistius poutassou), fresh or chilled	Imports	Blue whiting (Micromesistius poutassou)	Live, fresh or chilled	NA	Blue whiting	Fish	1	240	0	0	0	0	0	0	0	0	0	0	0	0	0	0	0	0	0	0	0	0	0	0	0	0	0	0	0	210	30	0	0	0	0	0	0	0	0	0	0	0
Azerbaijan	Blue whiting (Micromesistius poutassou), frozen	Imports	Blue whiting (Micromesistius poutassou)	Frozen	NA	Blue whiting	Fish	1	2480	0	0	0	0	0	0	0	0	0	0	0	0	0	0	0	0	0	0	0	0	0	0	0	9	0	500	191	0	187	236	670	200	160	307	20	0	0	0	0	0
Azerbaijan	Blue whitings (Micromesistius poutassou, Micromesistius australis), frozen	Imports	Blue whitings	Frozen	NA	Blue whitings	Fish	1	5615.57	0	0	0	0	0	0	0	0	0	0	0	0	0	0	0	0	0	0	0	0	0	0	0	0	0	0	0	0	0	0	0	0	0	0	0	0	139	66	500	140
Azerbaijan	Brisling or sprats, frozen	Exports	Brisling or sprats	Frozen	NA	Brisling or sprats	Fish	1	2807	0	0	0	0	0	0	0	0	0	0	0	0	0	0	0	0	0	0	0	0	0	0	0	0	0	0	0	0	1680	588	19	120	0	200	200	0	0	0	0	0
Azerbaijan	Carps live	Imports	Carps	Live, fresh or chilled	NA	Carps	Fish	1	114.33	0	0	0	0	0	0	0	0	0	0	0	0	0	0	0	0	0	0	0	0	0	0	0	0	0	0	0	0	0	0	0	0	0	0	2	0	0	0	4	0
Azerbaijan	Carps, fresh or chilled	Imports	Carps	Live, fresh or chilled	NA	Carps	Fish	1	3721.77	0	0	0	0	0	0	0	0	0	0	0	0	0	0	0	0	0	0	0	0	0	0	0	0	0	0	0	0	0	0	0	0	0	0	0	0	0	4	0	4
Azerbaijan	Carps, frozen	Imports	Carps	Frozen	NA	Carps	Fish	1	348.65	0	0	0	0	0	0	0	0	0	0	0	0	0	0	0	0	0	0	0	0	0	0	0	0	0	0	0	0	0	0	0	0	0	0	0	0	0	0	0	2
Azerbaijan	Catfish fillets, frozen	Imports	Catfish	Frozen	Fillets	Catfish	Fish	1.25	2086.88	0	0	0	0	0	0	0	0	0	0	0	0	0	0	0	0	0	0	0	0	0	0	0	0	0	0	0	0	0	0	0	0	0	0	0	0	2.5	571.25	552.5	225
Azerbaijan	Catfish, frozen	Imports	Catfish	Frozen	NA	Catfish	Fish	1	6377.02	0	0	0	0	0	0	0	0	0	0	0	0	0	0	0	0	0	0	0	0	0	0	0	0	0	0	0	0	0	0	0	0	0	0	0	0	0	692	1093	700
Azerbaijan	Cod nei, fillets, frozen	Exports	Cod	Frozen	Fillets	Cod	Fish	1.25	155	0	0	0	0	0	0	0	0	0	0	0	0	0	0	0	0	0	0	0	0	0	0	0	0	0	0	0	155	0	0	0	0	0	0	0	0	0	0	0	0
Azerbaijan	Cods nei, dried, whether or not salted	Imports	Cod	Dried	NA	Cod	Fish	2.82	1491.89	0	0	0	0	0	0	0	0	0	0	0	0	0	0	0	0	0	0	0	0	0	0	778.32	702.18	0	0	0	0	0	0	0	0	0	0	0	8.46	2.82	0	0	0
Azerbaijan	Cods, fresh or chilled, nei	Exports	Cod	Live, fresh or chilled	NA	Cod	Fish	1	2818	0	0	0	0	0	0	0	0	0	0	0	0	0	0	0	0	0	0	0	0	0	0	0	1290	1497	0	0	0	0	0	0	31	0	0	0	0	0	0	0	0
Azerbaijan	Gadiformes nei, frozen	Imports	Cod and hake and haddock	Frozen	NA	Cod and hake and haddock	Fish	1	2068	0	0	0	0	0	0	0	0	0	0	0	0	0	0	0	0	0	0	0	0	0	0	0	0	0	0	0	0	0	0	0	0	0	0	0	0	1034	938	0	0
Azerbaijan	Gadiformes, fresh or chilled, nei	Imports	Cod and hake and haddock	Live, fresh or chilled	NA	Cod and hake and haddock	Fish	1	240	0	0	0	0	0	0	0	0	0	0	0	0	0	0	0	0	0	0	0	0	0	0	0	0	0	0	0	0	0	0	0	0	0	0	0	0	68	106	47	19
Azerbaijan	Crustaceans nei, even smoked, frozen	Imports	Crustaceans	Smoked	NA	Crustacean	Crustacean	2	1040.86	0	0	0	0	0	0	0	0	0	0	0	0	0	0	0	0	0	0	0	0	0	0	0	0	0	0	0	0	0	0	0	0	0	0	126	324	208	282	62	12
Azerbaijan	Shrimps and prawns, other than coldwater, even smoked, frozen	Imports	Shrimps and prawns	Smoked	NA	Crustacean	Crustacean	2	1898.26	0	0	0	0	0	0	0	0	0	0	0	0	0	0	0	0	0	0	0	0	0	0	0	0	0	0	0	0	0	0	0	0	0	0	0	0	12	16	24	58
Azerbaijan	Shrimps and prawns, prep. or pres., in airtight containers	Imports	Shrimps and prawns	Prepared or preserved	NA	Crustacean	Crustacean	2.27	1088.33	0	0	0	0	0	0	0	0	0	0	0	0	0	0	0	0	0	0	0	0	0	0	0	0	0	0	0	0	0	0	0	0	0	0	0	0	27.24	38.59	45.4	22.7
Azerbaijan	Cold-water shrimps and prawns (Pandalus spp., Crangon crangon), frozen, even smoked, whether in shell or not	Imports	Shrimps and prawns (Pandalus spp.)	Smoked	In shell or not	Crustacean	Crustacean	2.42	955.682	0	0	0	0	0	0	0	0	0	0	0	0	0	0	0	0	0	0	0	0	0	0	0	0	0	0	0	0	0	0	0	0	0	0	0	0	12.1	43.56	496.1	210.54
Azerbaijan	Miscellaneous demersal fish,nei, fresh or chilled	Imports	Demersal fish	Live, fresh or chilled	NA	Demersal fish	Fish	1	160	0	0	0	0	0	0	0	0	0	0	0	0	0	0	0	0	0	0	0	0	0	0	0	59	0	101	0	0	0	0	0	0	0	0	0	0	0	0	0	0
Azerbaijan	European plaice, frozen	Imports	European plaice	Frozen	NA	European plaice	Fish	1	109	0	0	0	0	0	0	0	0	0	0	0	0	0	0	0	0	0	0	0	0	0	0	0	0	5	5	0	0	0	4	0	0	0	0	95	0	0	0	0	0
Azerbaijan	Euthynnus excl. skipjack or stripe-bellied bonitos, frozen	Imports	Euthynnus other than skipjack	Frozen	NA	Euthynnus other than skipjack	Fish	1	198	0	0	0	0	0	0	0	0	0	0	0	0	0	0	0	0	0	0	0	0	0	0	0	0	0	0	0	120	0	18	53	7	0	0	0	0	0	0	0	0
Azerbaijan	Fish dried, whether or not salted, nei	Imports	Fish	Dried	NA	Fish	Fish	2.82	390.316	0	0	0	0	0	0	0	0	0	0	0	0	0	0	0	0	0	0	0	0	0	78.96	115.62	0	0	0	0	56.4	0	14.1	0	0	0	11.28	0	11.28	0	47.94	16.92	5.64
Azerbaijan	Fish fillets, dried, salted or in brine, nei	Imports	Fish	Dried	Fillets	Fish	Fish	2.82	560.39	0	0	0	0	0	0	0	0	0	0	0	0	0	0	0	0	0	0	0	0	0	31.02	211.5	0	11.28	0	0	0	0	0	5.64	45.12	143.82	47.94	5.64	0	0	2.82	0	0
Azerbaijan	Fish fillets, frozen, nei	Imports	Fish	Frozen	Fillets	Fish	Fish	1.25	612.2	0	0	0	0	0	0	0	0	0	0	0	0	0	0	0	0	0	0	0	0	2.5	0	427.5	0	1.25	2.5	5	2.5	1.25	38.75	15	23.75	7.5	2.5	3.75	7.5	0	0	0	0
Azerbaijan	Fish heads, tails, maws, tongues, nei frozen	Exports	Fish	Frozen	Heads, tails, maws	Fish	Fish	5	2054.25	0	0	0	0	0	0	0	0	0	0	0	0	0	0	0	0	0	0	0	0	0	0	0	0	0	0	0	0	0	0	0	0	0	0	0	0	0	0	0	0
Azerbaijan	Fish live, nei	Imports	Fish	Live, fresh or chilled	NA	Fish	Fish	1	110	0	0	0	0	0	0	0	0	0	0	0	0	0	0	0	0	0	0	0	0	0	0	0	0	0	0	0	0	0	0	0	0	2	20	5	2	0	14	6	5
Azerbaijan	Fish meat, whether or not minced, frozen, nei	Imports	Fish	Frozen	Meat	Fish	Fish	1.25	707.9	0	0	0	0	0	0	0	0	0	0	0	0	0	0	0	0	0	0	0	0	128.75	0	0	1.25	1.25	1.25	0	7.5	0	7.5	1.25	6.25	13.75	372.5	8.75	0	3.75	7.5	32.5	8.75
Azerbaijan	Fish minced nei, prepared or preserved	Imports	Fish	Prepared or preserved	Minced	Fish	Fish	2.66	7511.41	0	0	0	0	0	0	0	0	0	0	0	0	0	0	0	0	0	0	0	0	55.86	37.24	15.96	228.76	0	409.64	106.4	2.66	0	74.48	87.78	260.68	167.58	218.12	31.92	502.74	436.24	287.28	276.64	311.22
Azerbaijan	Fish nei, prepared or preserved, not minced	Imports	Fish	Prepared or preserved	NA	Fish	Fish	2.66	6454.62	0	0	0	0	0	0	0	0	0	0	0	0	0	0	0	0	0	0	840.56	0	18.62	74.48	103.74	0	0	0	2.66	444.22	79.8	359.1	563.92	603.82	510.72	821.94	1026.76	119.7	119.7	122.36	103.74	109.06
Azerbaijan	Fish nei, salted or in brine	Exports	Fish	Salted	NA	Fish	Fish	2.82	606.3	0	0	0	0	0	0	0	0	0	0	0	0	0	0	0	0	0	0	0	0	197.4	0	211.5	0	197.4	0	0	0	0	0	0	0	0	0	0	0	0	0	0	0
Azerbaijan	Fish nei, salted or in brine	Imports	Fish	Salted	NA	Fish	Fish	2.82	4122.87	0	0	0	0	0	0	0	0	0	0	0	0	0	0	0	0	0	0	0	0	710.64	1159.02	1204.14	95.88	0	360.96	197.4	121.26	0	174.84	16.92	0	76.14	5.64	0	0	0	0	0	0
Azerbaijan	Fish, dried, salted or smoked	Imports	Fish	Dried	NA	Fish	Fish	2.82	626.04	0	0	0	0	0	0	0	0	0	0	0	0	0	0	0	0	0	0	626.04	0	0	0	0	0	0	0	0	0	0	0	0	0	0	0	0	0	0	0	0	0
Azerbaijan	Fish, fresh or chilled, nei	Imports	Fish	Live, fresh or chilled	NA	Fish	Fish	1	511.53	0	0	0	0	0	0	0	0	0	0	0	0	0	0	0	0	0	0	45	0	0	0	0	0	0	0	50	0	0	0	4	16	60	94	112	0	44	0	0	0
Azerbaijan	Fish, frozen, nei	Exports	Fish	Frozen	NA	Fish	Fish	1	2851.47	0	0	0	0	0	0	0	0	0	0	0	0	0	0	0	0	0	0	0	0	174	0	20	0	0	0	0	0	0	2277	365	0	0	0	0	0	0	0	0	0
Azerbaijan	Fish, frozen, nei	Imports	Fish	Frozen	NA	Fish	Fish	1	21599.8	0	0	0	0	0	0	0	0	0	0	0	0	0	0	0	0	0	0	0	0	86	86	279	0	1067	0	0	0	383	51	392	13	10	8	4	5141	1041	2771	2485	1900
Azerbaijan	Flatfish nei, frozen	Exports	Flatfish	Frozen	NA	Flatfish	Fish	1	1143	0	0	0	0	0	0	0	0	0	0	0	0	0	0	0	0	0	0	0	0	0	63	140	0	0	0	0	98	533	139	60	110	0	0	0	0	0	0	0	0
Azerbaijan	Flatfish nei, frozen	Imports	Flatfish	Frozen	NA	Flatfish	Fish	1	4199	0	0	0	0	0	0	0	0	0	0	0	0	0	0	0	0	0	0	0	0	0	0	30	11	5	0	479	85	55	11	0	175	1080	603	791	694	0	180	0	0
Azerbaijan	Flatfish, fresh or chilled, nei	Imports	Flatfish	Live, fresh or chilled	NA	Flatfish	Fish	1	115	0	0	0	0	0	0	0	0	0	0	0	0	0	0	0	0	0	0	0	0	0	0	0	0	0	0	0	0	0	0	0	0	0	0	1	1	0	0	0	0
Azerbaijan	Freshwater fish fillets, nei, frozen	Exports	Freshwater fish	Frozen	Fillets	Freshwater fish	Fish	1.25	127.5	0	0	0	0	0	0	0	0	0	0	0	0	0	0	0	0	0	0	0	0	0	0	0	0	0	0	0	106.25	0	21.25	0	0	0	0	0	0	0	0	0	0
Azerbaijan	Freshwater fish fillets, nei, frozen	Imports	Freshwater fish	Frozen	Fillets	Freshwater fish	Fish	1.25	873.75	0	0	0	0	0	0	0	0	0	0	0	0	0	0	0	0	0	0	0	0	0	0	0	2.5	0	0	0	2.5	0	2.5	0	2.5	327.5	443.75	92.5	0	0	0	0	0
Azerbaijan	Freshwater fish nei, frozen	Exports	Freshwater fish	Frozen	NA	Freshwater fish	Fish	1	2393	0	0	0	0	0	0	0	0	0	0	0	0	0	0	0	0	0	0	680	44	165	993	170	16	100	180	0	0	0	0	0	0	0	0	45	0	0	0	0	0
Azerbaijan	Freshwater fish nei, frozen	Imports	Freshwater fish	Frozen	NA	Freshwater fish	Fish	1	17169	0	0	0	0	0	0	0	0	0	0	0	0	0	0	0	0	0	0	0	0	0	0	0	7	0	434	781	1925	2126	3349	1009	468	1194	2544	3332	0	0	0	0	0
Azerbaijan	Freshwater fish, nei, fresh or chilled	Imports	Freshwater fish	Live, fresh or chilled	NA	Freshwater fish	Fish	1	690	0	0	0	0	0	0	0	0	0	0	0	0	0	0	0	0	0	0	0	0	0	0	80	0	321	0	0	181	0	0	0	0	0	0	0	108	0	0	0	0
Azerbaijan	Miscellaneous freshwater fish, dried, whether or not salted, not smoked, nei	Exports	freshwater fish	Dried	NA	Freshwater fish	Fish	2.82	2552.1	0	0	0	0	0	0	0	0	0	0	0	0	0	0	0	0	0	0	2261.64	290.46	0	0	0	0	0	0	0	0	0	0	0	0	0	0	0	0	0	0	0	0
Azerbaijan	Miscellaneous freshwater fish, prepared or preserved, not minced, nei	Exports	freshwater fish	Prepared or preserved	NA	Freshwater fish	Fish	2.66	305.9	0	0	0	0	0	0	0	0	0	0	0	0	0	0	0	0	0	0	305.9	0	0	0	0	0	0	0	0	0	0	0	0	0	0	0	0	0	0	0	0	0
Azerbaijan	Hakes nei, frozen	Imports	Hake	Frozen	NA	Hake	Fish	1	1633.11	0	0	0	0	0	0	0	0	0	0	0	0	0	0	0	0	0	0	0	0	0	0	0	0	0	0	0	0	0	10	0	0	0	0	0	0	40	7	0	0
Azerbaijan	Herring fillets, incl. coated in batter, cooked or not	Imports	Herring	NA	Fillets	Herring	Fish	1.25	715	0	0	0	0	0	0	0	0	0	0	0	0	0	0	0	0	0	0	0	0	0	0	0	1.25	0	0	0	0	0	0	5	41.25	195	456.25	16.25	0	0	0	0	0
Azerbaijan	Herrings nei, frozen	Imports	Herring	Frozen	NA	Herring	Fish	1	6382	0	0	0	0	0	0	0	0	0	0	0	0	0	0	0	0	0	0	0	0	0	24	0	200	589	694	389	250	125	373	99	544	942	556	481	118	340	101	133	130
Azerbaijan	Herrings, not minced, prep. or pres. in airtight containers, nei	Imports	Herring	Prepared or preserved	NA	Herring	Fish	2.66	13403.2	0	0	0	0	0	0	0	0	0	0	0	0	0	0	0	0	0	0	0	0	18.62	2.66	45.22	26.6	53.2	2.66	39.9	10.64	15.96	1220.94	196.84	5620.58	808.64	420.28	659.68	672.98	577.22	476.14	406.98	340.48
Azerbaijan	Herrings, not minced, prep. or pres., not in airtight containers	Imports	Herring	Prepared or preserved	NA	Herring	Fish	2.66	2261	0	0	0	0	0	0	0	0	0	0	0	0	0	0	0	0	0	0	0	0	0	0	0	7.98	0	106.4	0	0	273.98	0	1667.82	101.08	13.3	63.84	26.6	0	0	0	0	0
Azerbaijan	Jack and horse mackerel, frozen	Imports	Jack and horse mackerel	Frozen	NA	Jack and horse mackerel	Fish	1	268.8	0	0	0	0	0	0	0	0	0	0	0	0	0	0	0	0	0	0	0	0	0	0	0	0	0	0	50	0	5	10	34	0	0	0	0	0	0	20	48	49
Azerbaijan	Mackerel fillets, frozen	Imports	Mackerel	Frozen	Fillets	Mackerel	Fish	1.25	166.25	0	0	0	0	0	0	0	0	0	0	0	0	0	0	0	0	0	0	0	0	0	0	0	121.25	0	0	0	0	0	3.75	0	2.5	2.5	0	36.25	0	0	0	0	0
Azerbaijan	Mackerel prepared or preserved, not minced, nei	Imports	Mackerel	Prepared or preserved	NA	Mackerel	Fish	2.66	34092	0	0	0	0	0	0	0	0	0	0	0	0	0	0	0	0	0	0	0	0	0	0	0	0	0	0	47.88	774.06	0	1324.68	148.96	516.04	3383.52	4484.76	2436.56	5926.48	4138.96	4753.42	784.7	324.52
Azerbaijan	Mackerels nei, frozen	Imports	Mackerel	Frozen	NA	Mackerel	Fish	1	39725.9	0	0	0	0	0	0	0	0	0	0	0	0	0	0	0	0	0	0	0	150	0	32	0	39	77	35	50	431	1140	310	1043	1040	77	0	1695	3089	271	2970	2750	2400
Azerbaijan	Mackerels, fillets, prepared or preserved	Imports	Mackerel	Prepared or preserved	Fillets	Mackerel	Fish	2.66	569.24	0	0	0	0	0	0	0	0	0	0	0	0	0	0	0	0	0	0	0	2.66	0	0	0	0	2.66	0	0	0	0	0	21.28	90.44	250.04	74.48	127.68	0	0	0	0	0
Azerbaijan	Marine fish nei, smoked	Imports	Marine fish	Smoked	NA	Marine fish	Fish	2.5	1263.85	0	0	0	0	0	0	0	0	0	0	0	0	0	0	0	0	0	0	0	0	305	90	167.5	0	5	0	0	0	175	222.5	117.5	7.5	0	2.5	5	15	12.5	12.5	10	0
Azerbaijan	Pacific salmons, frozen, nei	Exports	Pacific salmons	Frozen	NA	Pacific salmons	Fish	1	1372	0	0	0	0	0	0	0	0	0	0	0	0	0	0	0	0	0	0	0	0	0	0	0	0	0	0	0	0	60	11	61	480	480	280	0	0	0	0	0	0
Azerbaijan	Pacific salmons, frozen, nei	Imports	Pacific salmons	Frozen	NA	Pacific salmons	Fish	1	717.39	0	0	0	0	0	0	0	0	0	0	0	0	0	0	0	0	0	0	0	0	0	0	0	0	6	16	15	5	0	13	10	26	17	0	0	0	0	8	53	21
Azerbaijan	Pilchards (Sardinops spp.), prep. or pres., not minced, nei	Imports	Pilchards (Sardinops spp.)	Prepared or preserved	NA	Pilchards (Sardinops spp.)	Fish	2.66	6357.4	0	0	0	0	0	0	0	0	0	0	0	0	0	0	0	0	0	0	0	0	0	0	0	2.66	0	0	13.3	329.84	1149.12	53.2	199.5	577.22	2295.58	931	805.98	0	0	0	0	0
Azerbaijan	Pilchards(Sardinops spp.) and Sardinellas, frozen	Imports	Pilchards (Sardinops spp.) and Sardinellas	Frozen	NA	Pilchards (Sardinops spp.) and Sardinellas	Fish	1	1368	0	0	0	0	0	0	0	0	0	0	0	0	0	0	0	0	0	0	0	0	0	0	0	0	0	0	0	0	0	5	200	0	0	1136	27	0	0	0	0	0
Azerbaijan	Polar cod, frozen	Imports	Polar cod	Frozen	NA	Polar cod	Fish	1	254	0	0	0	0	0	0	0	0	0	0	0	0	0	0	0	0	0	0	0	0	0	0	0	0	0	0	0	0	0	0	0	0	254	0	0	0	0	0	0	0
Azerbaijan	Pomfrets, ocean breams, frozen	Imports	Pomfret and ocean breams	Frozen	NA	Pomfret and ocean breams	Fish	1	888	0	0	0	0	0	0	0	0	0	0	0	0	0	0	0	0	0	0	0	0	0	0	0	12	0	25	191	104	157	34	0	150	190	0	25	0	0	0	0	0
Azerbaijan	Saithe (=Pollock), frozen	Imports	Saithe (=Pollock)	Frozen	NA	Saithe (=Pollock)	Fish	1	459	0	0	0	0	0	0	0	0	0	0	0	0	0	0	0	0	0	0	0	0	0	0	0	0	0	0	0	0	1	80	145	233	0	0	0	0	0	0	0	0
Azerbaijan	Salmon fillets, frozen	Imports	Salmon	Frozen	Fillets	Salmon	Fish	1.25	1363.16	0	0	0	0	0	0	0	0	0	0	0	0	0	0	0	0	0	0	0	0	0	0	0	0	0	1.25	0	5	0	0	0	0	0	0	0	0	6.25	32.5	125	187.5
Azerbaijan	Salmon nei, not minced, prepared or preserved	Imports	Salmon	Prepared or preserved	NA	Salmon	Fish	2.66	356.945	0	0	0	0	0	0	0	0	0	0	0	0	0	0	0	0	0	0	0	0	0	15.96	119.7	0	7.98	0	0	0	0	0	0	133	71.82	0	5.32	0	0	0	0	0
Azerbaijan	Salmons, smoked	Imports	Salmon	Smoked	NA	Salmon	Fish	2.5	639.3	0	0	0	0	0	0	0	0	0	0	0	0	0	0	0	0	0	0	0	0	0	0	0	0	0	0	0	0	0	0	0	0	2.5	5	22.5	2.5	10	10	35	32.5
Azerbaijan	Salmonoids, fresh or chilled, nei	Exports	Salmonids	Live, fresh or chilled	NA	Salmonids	Fish	1	177	0	0	0	0	0	0	0	0	0	0	0	0	0	0	0	0	0	0	0	0	0	177	0	0	0	0	0	0	0	0	0	0	0	0	0	0	0	0	0	0
Azerbaijan	Salmonoids, frozen	Exports	Salmonids	Frozen	NA	Salmonids	Fish	1	421	0	0	0	0	0	0	0	0	0	0	0	0	0	0	0	0	0	0	0	0	0	111	115	175	0	0	0	0	0	0	0	0	0	0	0	0	0	20	0	0
Azerbaijan	Salmonoids, frozen	Imports	Salmonids	Frozen	NA	Salmonids	Fish	1	981.42	0	0	0	0	0	0	0	0	0	0	0	0	0	0	0	0	0	0	0	0	78	0	189	46	57	10	0	0	60	8	2	0	0	0	0	0	115	195	67	59
Azerbaijan	Sardines, sardinellas, brisling or sprats, fresh or chilled	Exports	Sardine, sardinella, sprat	Live, fresh or chilled	NA	Sardine and sardinella and sprat	Fish	1	127	0	0	0	0	0	0	0	0	0	0	0	0	0	0	0	0	0	0	0	0	0	23	104	0	0	0	0	0	0	0	0	0	0	0	0	0	0	0	0	0
Azerbaijan	Sardines, sardinellas, brisling or sprats, frozen	Exports	Sardine, sardinella, sprat	Frozen	NA	Sardine and sardinella and sprat	Fish	1	2439.22	0	0	0	0	0	0	0	0	0	0	0	0	0	0	0	0	0	0	0	0	250	72	0	821	30	130	0	0	0	0	0	20	6	0	0	250	0	12	0	0
Azerbaijan	Sardines, sardinellas, brisling or sprats, frozen	Imports	Sardine, sardinella, sprat	Frozen	NA	Sardine and sardinella and sprat	Fish	1	3918	0	0	0	0	0	0	0	0	0	0	0	0	0	0	0	0	0	0	0	0	0	160	0	0	24	0	29	0	0	0	200	960	1483	614	407	2	0	0	0	0
Azerbaijan	Sardines, sardinellas, brisling or sprats, prep. or pres., not minced, nei	Imports	Sardine, sardinella, sprat	Prepared or preserved	NA	Sardine and sardinella and sprat	Fish	2.66	74804.9	0	0	0	0	0	0	0	0	0	0	0	0	0	0	0	0	0	0	0	0	15.96	2.66	18.62	0	1561.42	457.52	3758.58	388.36	303.24	2641.38	5636.54	2029.58	4777.36	4394.32	7086.24	3354.26	7511.84	6532.96	4285.26	2838.22
Azerbaijan	Seabass, frozen	Imports	Seabass	Frozen	NA	Seabass	Fish	1	619.34	0	0	0	0	0	0	0	0	0	0	0	0	0	0	0	0	0	0	0	0	0	0	0	0	5	0	0	0	0	0	0	0	0	0	0	0	0	13	7	14
Azerbaijan	Seabreams, frozen	Imports	Seabreams	Frozen	NA	Seabream	Fish	1	186	0	0	0	0	0	0	0	0	0	0	0	0	0	0	0	0	0	0	0	0	0	0	0	0	0	10	24	21	0	0	131	0	0	0	0	0	0	0	0	0
Azerbaijan	Skipjack tuna, frozen	Imports	Skipjack tuna	Frozen	NA	Skipjack tuna	Fish	1	268	0	0	0	0	0	0	0	0	0	0	0	0	0	0	0	0	0	0	0	0	2	0	0	0	0	0	0	0	0	0	0	18	2	5	7	17	44	80	45	48
Azerbaijan	Tilapia fillets, frozen	Imports	Tilapia	Frozen	Fillets	Tilapia	Fish	1.25	1755.84	0	0	0	0	0	0	0	0	0	0	0	0	0	0	0	0	0	0	0	0	0	0	0	0	0	0	0	0	0	0	0	0	0	0	0	0	0	401.25	357.5	150
Azerbaijan	Tilapias, frozen	Imports	Tilapia	Frozen	NA	Tilapia	Fish	1	143.44	0	0	0	0	0	0	0	0	0	0	0	0	0	0	0	0	0	0	0	0	0	0	0	0	0	0	0	0	0	0	0	0	0	0	0	0	0	0	0	0
Azerbaijan	Toothfish (Dissostichus spp.), fillets, fresh or chilled	Imports	Toothfish (Dissostichus spp.)	Live, fresh or chilled	Fillets	Toothfish (Dissostichus spp.)	Fish	1.25	290	0	0	0	0	0	0	0	0	0	0	0	0	0	0	0	0	0	0	0	0	0	0	0	0	0	0	0	0	0	0	0	0	162.5	122.5	5	0	0	0	0	0
Azerbaijan	Trouts and chars live	Imports	Trouts and chars	Live, fresh or chilled	NA	Trout and char	Fish	1	154.28	0	0	0	0	0	0	0	0	0	0	0	0	0	0	0	0	0	0	0	0	0	0	0	0	0	0	0	0	0	0	1	0	0	0	2	7	0	20	0	0
Azerbaijan	Trouts and chars, frozen	Imports	Trouts and chars	Frozen	NA	Trout and char	Fish	1	2301.78	0	0	0	0	0	0	0	0	0	0	0	0	0	0	0	0	0	0	0	0	0	0	0	3	0	8	0	0	1	0	0	23	38	14	45	14	6	70	242	255
Azerbaijan	Tunas nei, frozen	Imports	Tuna	Frozen	NA	Tuna	Fish	1	240	0	0	0	0	0	0	0	0	0	0	0	0	0	0	0	0	0	0	0	0	0	0	0	3	24	0	0	0	0	1	0	0	0	0	199	0	3	0	0	10
Azerbaijan	Tunas prepared or preserved, not minced, nei	Imports	Tuna	Prepared or preserved	NA	Tuna	Fish	2.66	2353.7	0	0	0	0	0	0	0	0	0	0	0	0	0	0	0	0	0	0	0	0	0	0	5.32	15.96	13.3	7.98	42.56	31.92	47.88	5.32	159.6	2.66	47.88	18.62	66.5	79.8	119.7	313.88	587.86	61.18
Azerbaijan	Tunas, bonitos, billfishes, nei, minced, prepared or preserved	Imports	Tunas, bonitos, billfishes	Prepared or preserved	Minced	Tuna and bonito and billfish	Fish	2.66	409.64	0	0	0	0	0	0	0	0	0	0	0	0	0	0	0	0	0	0	0	0	0	0	0	0	0	0	0	0	0	0	2.66	167.58	82.46	29.26	127.68	0	0	0	0	0
Bahamas	Anchovies, prepared or preserved, not minced	Imports	Anchovy	Prepared or preserved	NA	Anchovy	Fish	2.66	534.66	0	0	0	0	0	0	0	0	0	0	0	0	0	0	0	0	0	0	0	0	0	23.94	26.6	37.24	31.92	21.28	26.6	23.94	18.62	15.96	47.88	37.24	29.26	26.6	23.94	21.28	23.94	23.94	34.58	39.9
Bahamas	Atlantic salmon and Danube salmon, frozen	Imports	Atlantic salmon and Danube salmon	Frozen	NA	Atlantic salmon and Danube salmon	Fish	1	116.86	0	0	0	0	0	0	0	0	0	0	0	0	0	0	0	0	0	0	0	0	0	2	0	2	2	3	4	3	5	3	2	3	5	2	2	4	4	1	1	5
Bahamas	Cuttlefishes, frozen	Imports	Cuttlefish	Frozen	NA	Cephalopod	Cephalopod	1	604	0	0	0	0	0	0	0	0	0	0	0	0	0	0	0	0	0	0	0	0	0	0	0	9	6	35	22	5	6	20	31	36	57	51	43	34	38	44	44	66
Bahamas	Cuttlefishes and squids, live, fresh or chilled, nei	Imports	Cuttlefish and squid	Live, fresh or chilled	NA	Cephalopod	Cephalopod	1	386.02	0	0	0	0	0	0	0	0	0	0	0	0	0	0	0	0	0	0	0	0	0	15	0	7	56	220	11	11	7	6	2	4	12	2	4	6	9	4	4	5
Bahamas	Octopus, frozen	Imports	Octopus	Frozen	NA	Cephalopod	Cephalopod	1	256.21	0	0	0	0	0	0	0	0	0	0	0	0	0	0	0	0	0	0	0	0	0	11	26	11	13	6	17	32	14	5	3	2	3	5	5	8	15	13	11	16
Bahamas	Squids (Ommastrephes sagittatus, Loligo spp.), frozen	Imports	Squid	Frozen	NA	Cephalopod	Cephalopod	1	134.36	0	0	0	0	0	0	0	0	0	0	0	0	0	0	0	0	0	0	0	0	0	0	0	0	0	0	0	0	0	0	0	0	0	0	0	0	0	0	0	0
Bahamas	Miscellaneous coastal fish, fillets, fresh or chilled, nei	Imports	Coastal fish	Live, fresh or chilled	Fillets	Coastal fish	Fish	1.25	233.75	0	0	0	0	0	0	0	0	0	0	0	0	0	0	0	0	0	0	0	0	0	0	0	0	87.5	41.25	0	0	0	8.75	3.75	3.75	3.75	17.5	2.5	11.25	3.75	10	18.75	21.25
Bahamas	Miscellaneous coastal fishes fillets, frozen, nei	Imports	Coastal fish	Frozen	Fillets	Coastal fish	Fish	1.25	1047.4	0	0	0	0	0	0	0	0	0	0	0	0	0	0	0	0	0	0	0	0	0	0	0	0	263.75	115	0	0	0	106.25	56.25	78.75	80	6.25	3.75	8.75	2.5	5	16.25	107.5
Bahamas	Cods nei, dried, whether or not salted	Imports	Cod	Dried	NA	Cod	Fish	2.82	2191.17	0	0	0	0	0	0	0	0	0	0	0	0	0	0	0	0	0	0	0	0	0	0	0	22.56	33.84	19.74	16.92	28.2	14.1	22.56	45.12	50.76	62.04	81.78	146.64	214.32	228.42	172.02	160.74	163.56
Bahamas	Cods nei, frozen	Imports	Cod	Frozen	NA	Cod	Fish	1	427.86	0	0	0	0	0	0	0	0	0	0	0	0	0	0	0	0	0	0	0	0	0	1	0	5	23	26	6	9	1	2	2	1	0	3	1	4	8	3	2	1
Bahamas	Gadiformes, fresh or chilled, nei	Imports	Cod and hake and haddock	Live, fresh or chilled	NA	Cod and hake and haddock	Fish	1	131.04	0	0	0	0	0	0	0	0	0	0	0	0	0	0	0	0	0	0	0	0	0	0	0	0	0	0	0	0	0	0	0	0	0	0	0	0	0	10	21	20
Bahamas	American/European lobsters (Homarus spp.), live, fresh or chilled, nei	Imports	American/European lobsters (Homarus spp.)	Live, fresh or chilled	NA	Crustacean	Crustacean	1	172	0	0	0	0	0	0	0	0	0	0	0	0	0	0	0	0	0	0	0	0	0	0	0	0	20	36	11	12	6	2	8	0	3	6	58	3	2	4	1	0
Bahamas	Crab meat nei, prepared or preserved	Exports	Crab	Prepared or preserved	Meat	Crustacean	Crustacean	5.9701	1637.36	0	0	0	0	0	0	0	0	0	0	0	0	0	0	0	0	95.5216	197.013	280.595	167.163	149.252	131.342	262.684	286.565	0	0	0	0	0	0	0	0	0	0	0	5.9701	0	0	0	0
Bahamas	Crab meat nei, prepared or preserved	Imports	Crab	Prepared or preserved	Meat	Crustacean	Crustacean	5.9701	5499.06	0	0	0	0	0	0	0	0	0	0	0	0	0	0	0	0	0	0	0	0	0	197.013	340.296	358.206	453.728	686.561	447.757	411.937	459.698	346.266	232.834	334.326	83.5814	137.312	191.043	137.312	119.402	125.372	131.342	149.252
Bahamas	Crabs nei, frozen	Exports	Crab	Frozen	NA	Crustacean	Crustacean	1	1064.73	0	0	0	0	0	0	0	0	0	0	0	0	0	0	0	0	0	0	0	0	0	0	0	43	38	48	41	36	23	20	40	41	48	38	57	56	53	89	110	89
Bahamas	Crabs nei, frozen	Imports	Crab	Frozen	NA	Crustacean	Crustacean	1	949.33	0	0	0	0	0	0	0	0	0	0	0	0	0	0	0	0	0	0	0	0	0	15	30	16	41	16	25	30	22	16	23	29	49	71	41	47	53	50	42	40
Bahamas	Crabs, not frozen	Imports	Crab	NA	NA	Crustacean	Crustacean	1	114	0	0	0	0	0	0	0	0	0	0	0	0	0	0	0	0	0	0	0	0	0	19	0	4	23	13	18	16	6	1	1	1	0	1	2	1	1	2	2	3
Bahamas	Crustaceans nei, even smoked, frozen	Imports	Crustaceans	Smoked	NA	Crustacean	Crustacean	2	509.68	0	0	0	0	0	0	0	0	0	0	0	0	0	0	0	0	0	0	0	0	0	8	4	28	66	56	64	54	22	24	20	10	8	14	12	12	6	12	16	24
Bahamas	Crustaceans nei, prepared or preserved	Imports	Crustaceans	Prepared or preserved	NA	Crustacean	Crustacean	2.27	299.64	0	0	0	0	0	0	0	0	0	0	0	0	0	0	0	0	0	0	0	0	0	6.81	15.89	18.16	11.35	11.35	18.16	18.16	22.7	11.35	13.62	40.86	11.35	15.89	13.62	15.89	15.89	9.08	18.16	11.35
Bahamas	Miscellaneous crustaceans, not frozen, nei	Imports	Crustaceans	NA	NA	Crustacean	Crustacean	1	373	0	0	0	0	0	0	0	0	0	0	0	0	0	0	0	0	0	0	0	0	0	2	0	3	6	30	3	8	23	70	64	41	30	10	6	5	6	7	21	38
Bahamas	Crustaceans and molluscs, fresh, frozen, dried, salted, etc.	Imports	Crustaceans and molluscs	Dried	NA	Crustacean	Crustacean	2.54	9174.48	238.76	200.66	200.66	0	1203.96	157.48	307.34	294.64	246.38	294.64	419.1	444.5	386.08	553.72	508	594.36	632.46	614.68	802.64	449.58	457.2	0	167.64	0	0	0	0	0	0	0	0	0	0	0	0	0	0	0	0	0
Bahamas	Crustaceans and molluscs, nei, frozen	Exports	Crustaceans and molluscs	Frozen	NA	Crustacean	Crustacean	1	541	10	4	0	0	0	196	26	0	0	0	56	48	142	0	0	59	0	0	0	0	0	0	0	0	0	0	0	0	0	0	0	0	0	0	0	0	0	0	0	0
Bahamas	Crustaceans and molluscs, prepared or preserved, nei	Imports	Crustaceans and molluscs	Prepared or preserved	NA	Crustacean	Crustacean	2.27	1432.37	38.59	61.29	61.29	0	0	0	0	0	0	0	118.04	113.5	54.48	56.75	45.4	242.89	183.87	133.93	115.77	104.42	102.15	0	0	0	0	0	0	0	0	0	0	0	0	0	0	0	0	0	0	0
Bahamas	Lobsters, live	Exports	Lobster	Live, fresh or chilled	NA	Crustacean	Crustacean	1	213	0	0	0	0	0	0	0	0	0	0	0	0	0	0	0	0	0	0	0	0	0	0	0	0	43	8	0	0	0	0	44	8	6	0	0	0	1	1	8	94
Bahamas	Rock lobster & other sea crawfish (Palinurus, Panulirus, Jasus), meat or tails, frozen	Exports	Lobster	Frozen	Meat or tails	Crustacean	Crustacean	1.43	559.216	0	0	0	0	0	0	0	0	0	0	0	0	0	0	0	0	0	0	0	0	0	0	0	0	0	0	0	0	0	0	0	0	0	0	0	0	0	0	0	0
Bahamas	Rock lobster and other sea crawfish (Palinurus, Panulirus, Jasus), even smoked, frozen, nei	Exports	Lobster	Smoked	NA	Crustacean	Crustacean	2	906.72	0	0	0	0	0	0	0	0	0	0	0	0	0	0	0	0	0	0	0	0	0	0	0	0	0	0	0	0	0	0	0	0	0	0	0	0	0	0	0	0
Bahamas	Rock lobsters (Jasus spp.), nei, fresh or chilled	Exports	Lobster	Live, fresh or chilled	NA	Crustacean	Crustacean	1	785	0	0	0	0	0	0	0	0	0	0	0	0	0	0	0	0	0	0	0	0	0	0	0	739	41	0	0	0	2	0	0	3	0	0	0	0	0	0	0	0
Bahamas	Shrimps and prawns, frozen, nei	Imports	Shrimps and prawns	Frozen	NA	Crustacean	Crustacean	1	2672	0	0	0	0	0	0	0	0	0	0	0	0	0	0	0	0	0	0	0	0	0	98	83	103	107	80	81	84	79	140	220	223	304	276	245	239	258	52	0	0
Bahamas	Shrimps and prawns, not frozen, nei	Imports	Shrimps and prawns	NA	NA	Crustacean	Crustacean	1	1114	0	0	0	0	0	0	0	0	0	0	0	0	0	0	0	0	0	0	0	0	0	37	26	58	180	210	160	113	53	13	7	50	40	36	40	26	33	13	10	9
Bahamas	Shrimps and prawns, other than coldwater, even smoked, frozen	Imports	Shrimps and prawns	Smoked	NA	Crustacean	Crustacean	2	547.5	0	0	0	0	0	0	0	0	0	0	0	0	0	0	0	0	0	0	0	0	0	0	0	0	0	0	0	0	0	0	0	0	0	0	0	0	0	26	68	60
Bahamas	Shrimps and prawns, prep. or pres., not in airtight containers	Imports	Shrimps and prawns	Prepared or preserved	NA	Crustacean	Crustacean	2.27	322.567	0	0	0	0	0	0	0	0	0	0	0	0	0	0	0	0	0	0	0	0	0	0	0	0	0	0	0	0	0	0	0	0	0	0	0	0	0	15.89	31.78	36.32
Bahamas	Shrimps, prawns, prepared or preserved, nei	Imports	Shrimps and prawns	Prepared or preserved	NA	Crustacean	Crustacean	2.27	1164.51	0	0	0	0	0	0	0	0	0	0	0	0	0	0	0	0	0	0	0	0	0	63.56	63.56	63.56	108.96	113.5	111.23	118.04	59.02	56.75	72.64	54.48	56.75	20.43	63.56	24.97	104.42	9.08	0	0
Bahamas	Cold-water shrimps and prawns (Pandalus spp., Crangon crangon), frozen, even smoked, whether in shell or not	Imports	Shrimps and prawns (Pandalus spp.)	Smoked	In shell or not	Crustacean	Crustacean	2.42	2544.39	0	0	0	0	0	0	0	0	0	0	0	0	0	0	0	0	0	0	0	0	0	0	0	0	0	0	0	0	0	0	0	0	0	0	0	0	0	212.96	425.92	510.62
Bahamas	Spiny lobsters (Panulirus spp.), meat or tails, fresh or chilled	Exports	Spiny lobsters (Panulirus spp.)	Live, fresh or chilled	Meat or tails	Crustacean	Crustacean	1.43	2769.91	0	0	0	0	0	0	0	0	0	0	0	0	0	0	0	0	0	0	0	0	0	0	0	0	1162.59	0	0	0	0	0	0	0	484.77	1.43	51.48	0	0	1025.31	0	44.33
Bahamas	Spiny lobsters (Panulirus spp.), meat or tails, frozen	Exports	Spiny lobsters (Panulirus spp.)	Frozen	Meat or tails	Crustacean	Crustacean	1.43	111609	982.41	1139.71	903.76	1026.74	1189.76	939.51	1155.44	1215.5	1522.95	1853.28	2173.6	1644.5	2215.07	1754.61	2860	2982.98	3359.07	3493.49	3546.4	3238.95	3546.4	3147.43	3280.42	2648.36	3519.23	3226.08	3693.69	4843.41	3800.94	2952.95	3227.51	2934.36	2475.33	3188.9	2870.01	2779.92	2955.81	2701.27	2589.73	2782.78
Bahamas	Spiny lobsters (Panulirus spp.), meat or tails, frozen	Imports	Spiny lobsters (Panulirus spp.)	Frozen	Meat or tails	Crustacean	Crustacean	1.43	217.36	27.17	28.6	28.6	0	0	0	0	0	0	0	21.45	0	2.86	0	0	5.72	0	0	0	0	0	0	0	0	0	0	0	0	0	4.29	2.86	1.43	0	0	2.86	8.58	5.72	2.86	71.5	2.86
Bahamas	Spiny lobsters (Panulirus spp.), nei, frozen	Exports	Spiny lobsters (Panulirus spp.)	Frozen	NA	Crustacean	Crustacean	1	814.39	0	0	0	0	0	0	0	0	0	0	0	0	0	0	0	0	0	0	0	0	0	0	0	0	33	0	0	0	0	0	0	0	1	0	0	14	0	0	0	0
Bahamas	Spiny lobsters (Panulirus spp.), nei, frozen	Imports	Spiny lobsters (Panulirus spp.)	Frozen	NA	Crustacean	Crustacean	1	108.96	0	0	0	0	0	0	0	0	0	0	0	0	0	0	0	0	0	0	0	0	0	0	0	0	0	1	0	0	0	1	9	17	30	3	3	5	4	6	4	6
Bahamas	Spiny lobsters (Panulirus spp.), whole, frozen	Exports	Spiny lobsters (Panulirus spp.)	Frozen	NA	Crustacean	Crustacean	1	1212	0	0	0	0	0	0	0	0	0	0	0	0	0	0	0	0	0	0	0	0	0	0	0	0	246	12	0	0	0	0	0	0	0	101	68	118	164	49	0	22
Bahamas	Dolphinfishes, frozen	Imports	Dolphinfish	Frozen	NA	Dolphinfish	Fish	1	227	0	0	0	0	0	0	0	0	0	0	0	0	0	0	0	0	0	0	0	0	0	0	0	0	3	0	0	0	0	0	0	1	4	21	35	16	40	16	31	60
Bahamas	Fish fillets, fresh or chilled, nei	Imports	Fish	Live, fresh or chilled	Fillets	Fish	Fish	1.25	1393.03	0	0	0	0	0	0	0	0	0	0	0	0	0	0	0	0	0	0	0	0	0	40	688.75	83.75	93.75	176.25	40	25	35	12.5	13.75	10	12.5	33.75	18.75	21.25	7.5	8.75	16.25	31.25
Bahamas	Fish fillets, frozen, nei	Imports	Fish	Frozen	Fillets	Fish	Fish	1.25	1676.96	0	0	0	0	0	0	0	0	0	0	0	0	0	0	0	0	0	0	0	0	0	110	0	208.75	102.5	93.75	155	115	196.25	71.25	68.75	58.75	35	21.25	10	41.25	11.25	20	45	35
Bahamas	Fish live, nei	Imports	Fish	Live, fresh or chilled	NA	Fish	Fish	1	213.75	0	0	0	0	0	0	0	0	0	0	0	0	0	0	0	0	0	0	0	0	0	20	0	0	0	0	40	58	87	0	0	0	0	0	0	0	0	0	0	0
Bahamas	Fish meat, whether or not minced, frozen, nei	Imports	Fish	Frozen	Meat	Fish	Fish	1.25	3538.06	0	0	0	0	0	0	0	0	0	0	0	0	0	0	0	0	0	0	0	0	0	83.75	0	53.75	116.25	206.25	211.25	288.75	262.5	372.5	408.75	473.75	300	38.75	16.25	40	36.25	42.5	87.5	102.5
Bahamas	Fish minced nei, in airtight containers prepared or preserved	Imports	Fish	Prepared or preserved	Minced	Fish	Fish	2.66	1635.87	0	0	0	0	0	0	0	0	0	0	0	0	0	0	0	0	0	0	0	0	0	0	0	0	117.04	156.94	0	0	0	71.82	236.74	164.92	303.24	85.12	10.64	42.56	10.64	7.98	10.64	39.9
Bahamas	Fish minced nei, prepared or preserved	Imports	Fish	Prepared or preserved	Minced	Fish	Fish	2.66	3172.74	0	0	0	0	0	0	0	0	0	0	0	0	0	0	0	0	0	0	0	0	0	289.94	486.78	638.4	2.66	10.64	281.96	518.7	231.42	23.94	2.66	45.22	194.18	109.06	82.46	23.94	15.96	42.56	2.66	21.28
Bahamas	Fish nei, prepared or preserved, not minced	Imports	Fish	Prepared or preserved	NA	Fish	Fish	2.66	45589.7	1117.2	747.46	747.46	258.02	1846.04	1460.34	1822.1	1710.38	1867.32	2308.88	1758.26	2394	1963.08	2561.58	2830.24	2598.82	3226.58	3912.86	3114.86	3511.2	3458	0	0	26.6	18.62	29.26	50.54	127.68	42.56	2.66	2.66	2.66	0	2.66	2.66	2.66	2.66	5.32	13.3	7.98
Bahamas	Fish nei, smoked	Imports	Fish	Smoked	NA	Fish	Fish	2.5	2007.83	0	0	0	0	0	0	0	0	0	0	0	0	0	0	0	0	0	0	0	0	0	107.5	170	202.5	262.5	137.5	55	77.5	50	67.5	75	72.5	60	87.5	82.5	80	45	72.5	50	52.5
Bahamas	Fish not minced, prep. or pres., in airtight containers	Imports	Fish	Prepared or preserved	NA	Fish	Fish	2.66	529.819	0	0	0	0	0	0	0	0	0	0	0	0	0	0	0	0	0	0	0	0	0	23.94	34.58	0	135.66	114.38	0	0	0	37.24	29.26	39.9	42.56	5.32	2.66	2.66	2.66	2.66	2.66	2.66
Bahamas	Fish, dried, salted or smoked	Imports	Fish	Dried	NA	Fish	Fish	2.82	3581.4	98.7	59.22	59.22	0	121.26	109.98	124.08	95.88	186.12	222.78	236.88	211.5	166.38	160.74	157.92	451.2	112.8	84.6	676.8	115.62	112.8	0	16.92	0	0	0	0	0	0	0	0	0	0	0	0	0	0	0	0	0
Bahamas	Fish, fresh or chilled, nei	Exports	Fish	Live, fresh or chilled	NA	Fish	Fish	1	215	0	0	0	0	0	0	0	0	0	0	0	0	0	0	0	0	0	0	0	0	0	0	0	107	0	0	0	0	8	0	0	0	0	0	0	0	0	1	73	26
Bahamas	Fish, fresh or chilled, nei	Imports	Fish	Live, fresh or chilled	NA	Fish	Fish	1	1962.1	0	0	0	0	0	0	0	0	0	0	0	0	0	0	0	0	0	0	0	0	0	67	24	43	146	31	21	40	61	10	81	164	237	126	189	292	246	73	1	8
Bahamas	Fish, fresh, chilled or frozen	Exports	Fish	Live, fresh or chilled	NA	Fish	Fish	1	2960	4	48	66	34	92	153	202	273	30	70	150	169	157	211	220	242	193	93	20	42	134	146	211	0	0	0	0	0	0	0	0	0	0	0	0	0	0	0	0	0
Bahamas	Fish, fresh, chilled or frozen	Imports	Fish	Live, fresh or chilled	NA	Fish	Fish	1	4836	123	75	75	210	158	73	189	152	142	252	200	200	222	270	312	328	314	310	290	471	470	0	0	0	0	0	0	0	0	0	0	0	0	0	0	0	0	0	0	0
Bahamas	Fish, frozen, nei	Imports	Fish	Frozen	NA	Fish	Fish	1	2033.69	0	0	0	0	0	0	0	0	0	0	0	0	0	0	0	0	0	0	0	0	0	82	184	163	173	281	260	175	85	38	8	8	18	15	8	13	15	5	1	3
Bahamas	Flatfish nei, frozen	Imports	Flatfish	Frozen	NA	Flatfish	Fish	1	1560.38	0	0	0	0	0	0	0	0	0	0	0	0	0	0	0	0	0	0	0	0	0	3	2	1	1	17	2	12	3	23	119	128	132	112	87	112	77	92	105	114
Bahamas	Freshwater fish nei, live	Imports	Freshwater fish	Live, fresh or chilled	NA	Freshwater fish	Fish	1	177	0	0	0	0	0	0	0	0	0	0	0	0	0	0	0	0	0	0	0	0	0	0	0	0	5	0	0	0	0	14	37	48	34	9	11	9	3	1	1	5
Bahamas	Grouper, fresh or chilled	Exports	Grouper	Live, fresh or chilled	NA	Grouper	Fish	1	143	0	0	0	0	0	0	0	0	0	0	0	0	0	0	0	0	0	0	0	0	0	0	0	0	6	9	0	0	0	0	3	6	2	6	37	5	32	31	0	0
Bahamas	Grouper, fresh or chilled	Imports	Grouper	Live, fresh or chilled	NA	Grouper	Fish	1	127.04	0	0	0	0	0	0	0	0	0	0	0	0	0	0	0	0	0	0	0	0	0	0	0	0	9	6	0	0	0	20	39	24	10	0	1	9	3	2	1	3
Bahamas	Grouper, frozen	Imports	Grouper	Frozen	NA	Grouper	Fish	1	741	0	0	0	0	0	0	0	0	0	0	0	0	0	0	0	0	0	0	0	0	0	0	0	0	37	37	0	0	0	37	107	56	65	31	27	27	64	75	56	62
Bahamas	Herrings nei, frozen	Imports	Herring	Frozen	NA	Herring	Fish	1	600.55	0	0	0	0	0	0	0	0	0	0	0	0	0	0	0	0	0	0	0	0	0	48	0	21	19	32	4	1	4	1	2	3	6	3	0	0	0	0	0	5
Bahamas	Herrings, not minced, prep. or pres. in airtight containers, nei	Imports	Herring	Prepared or preserved	NA	Herring	Fish	2.66	276.64	0	0	0	0	0	0	0	0	0	0	0	0	0	0	0	0	0	0	0	0	0	29.26	29.26	26.6	18.62	13.3	0	0	0	26.6	23.94	37.24	18.62	5.32	10.64	7.98	5.32	5.32	7.98	10.64
Bahamas	Mackerel prepared or preserved, not minced, nei	Imports	Mackerel	Prepared or preserved	NA	Mackerel	Fish	2.66	16443.5	0	0	0	0	0	0	0	0	0	0	0	0	0	0	0	0	0	0	0	0	0	188.86	167.58	207.48	414.96	207.48	226.1	486.78	619.78	837.9	1441.72	1364.58	1518.86	691.6	345.8	585.2	601.16	625.1	611.8	766.08
Bahamas	Marine fish, frozen, nei	Exports	Marine fish	Frozen	NA	Marine fish	Fish	1	543	0	0	0	0	0	0	0	0	0	0	0	0	0	0	0	0	0	0	0	0	0	0	0	1	0	32	42	110	13	0	19	62	42	55	14	74	9	53	0	17
Bahamas	Miscellaneous marine fish, salted or in brine, nei	Imports	Marine fish	Salted	NA	Marine fish	Fish	2.82	564	0	0	0	0	0	0	0	0	0	0	0	0	0	0	0	0	0	0	0	0	0	8.46	0	19.74	53.58	42.3	33.84	53.58	53.58	109.98	50.76	42.3	36.66	22.56	16.92	5.64	2.82	2.82	2.82	2.82
Bahamas	Pacific salmons, frozen, nei	Imports	Pacific salmons	Frozen	NA	Pacific salmons	Fish	1	278.61	0	0	0	0	0	0	0	0	0	0	0	0	0	0	0	0	0	0	0	0	0	3	0	6	8	3	2	2	4	2	2	11	21	46	68	58	23	0	1	1
Bahamas	Pilchards (Sardinops spp.), prep. or pres., not minced, nei	Imports	Pilchards (Sardinops spp.)	Prepared or preserved	NA	Pilchards (Sardinops spp.)	Fish	2.66	12290.5	0	0	0	0	0	0	0	0	0	0	0	0	0	0	0	0	0	0	0	0	0	667.66	0	0	829.92	877.8	0	0	0	707.56	718.2	649.04	840.56	625.1	683.62	625.1	702.24	686.28	529.34	715.54
Bahamas	Salmon nei prep. or pres., not minced, not in airtight containers	Imports	Salmon	Prepared or preserved	NA	Salmon	Fish	2.66	516.998	0	0	0	0	0	0	0	0	0	0	0	0	0	0	0	0	0	0	0	0	0	0	0	0	0	0	0	0	0	0	0	0	0	0	0	0	0	0	0	0
Bahamas	Salmon nei, not minced, prep.or pres, in airtight containers	Imports	Salmon	Prepared or preserved	NA	Salmon	Fish	2.66	1721.02	0	0	0	0	0	0	0	0	0	0	0	0	0	0	0	0	0	0	0	0	0	55.86	191.52	79.8	111.72	82.46	0	0	0	114.38	122.36	135.66	196.84	122.36	69.16	87.78	77.14	74.48	85.12	114.38
Bahamas	Salmon nei, not minced, prepared or preserved	Imports	Salmon	Prepared or preserved	NA	Salmon	Fish	2.66	614.859	0	0	0	0	0	0	0	0	0	0	0	0	0	0	0	0	0	0	0	0	0	0	0	0	7.98	0	82.46	87.78	111.72	2.66	0	2.66	0	0	2.66	0	0	2.66	5.32	2.66
Bahamas	Salmons, fresh or chilled, nei	Imports	Salmon	Live, fresh or chilled	NA	Salmon	Fish	1	133	0	0	0	0	0	0	0	0	0	0	0	0	0	0	0	0	0	0	0	0	0	2	27	2	11	6	5	2	7	6	11	12	7	7	9	10	7	2	0	0
Bahamas	Salmons, smoked	Imports	Salmon	Smoked	NA	Salmon	Fish	2.5	5084.85	0	0	0	0	0	0	0	0	0	0	0	0	0	0	0	0	0	0	0	0	0	90	62.5	47.5	137.5	267.5	255	1275	267.5	357.5	225	202.5	182.5	107.5	110	132.5	170	162.5	215	200
Bahamas	Salmonoids, fresh or chilled, nei	Imports	Salmonids	Live, fresh or chilled	NA	Salmonids	Fish	1	229.18	0	0	0	0	0	0	0	0	0	0	0	0	0	0	0	0	0	0	0	0	0	27	0	34	2	15	9	9	3	4	3	15	13	3	18	11	6	7	10	37
Bahamas	Salmonoids, frozen	Imports	Salmonids	Frozen	NA	Salmonids	Fish	1	604.13	0	0	0	0	0	0	0	0	0	0	0	0	0	0	0	0	0	0	0	0	0	7	0	20	22	16	20	13	6	11	4	4	7	4	5	3	6	27	51	84
Bahamas	Saltwater fish nei, live	Imports	Saltwater fish	Live, fresh or chilled	NA	Saltwater fish	Fish	1	274	0	0	0	0	0	0	0	0	0	0	0	0	0	0	0	0	0	0	0	0	0	0	0	0	16	17	0	0	0	54	44	39	21	12	9	7	30	4	7	7
Bahamas	Sardines, sardinellas, brisling or sprats, frozen	Imports	Sardine, sardinella, sprat	Frozen	NA	Sardine and sardinella and sprat	Fish	1	157.03	0	0	0	0	0	0	0	0	0	0	0	0	0	0	0	0	0	0	0	0	0	12	0	5	6	1	1	19	0	1	1	5	6	3	3	0	1	0	1	0
Bahamas	Sardines, sardinellas, brisling or sprats, prep. or pres., not minced, nei	Imports	Sardine, sardinella, sprat	Prepared or preserved	NA	Sardine and sardinella and sprat	Fish	2.66	3757.44	0	0	0	0	0	0	0	0	0	0	0	0	0	0	0	0	0	0	0	0	0	0	646.38	760.76	34.58	2.66	821.94	619.78	837.9	0	0	0	0	0	0	2.66	0	0	2.66	15.96
Bahamas	Skipjack prepared or preserved, not minced, nei	Imports	Skipjack tuna	Prepared or preserved	NA	Skipjack tuna	Fish	2.66	9712.83	0	0	0	0	0	0	0	0	0	0	0	0	0	0	0	0	0	0	0	0	0	0	0	0	0	0	0	0	0	0	0	0	0	0	0	0	0	0	0	0
Bahamas	Skipjack tuna, frozen	Exports	Skipjack tuna	Frozen	NA	Skipjack tuna	Fish	1	122	0	0	0	0	0	0	0	0	0	0	0	0	0	0	0	0	0	0	0	0	0	0	0	0	0	0	0	0	0	0	0	0	0	0	0	0	0	0	0	0
Bahamas	Snapper, fresh or chilled	Exports	Snapper	Live, fresh or chilled	NA	Snapper	Fish	1	197	0	0	0	0	0	0	0	0	0	0	0	0	0	0	0	0	0	0	0	0	0	0	0	0	2	7	0	0	0	12	18	10	0	42	13	13	29	32	0	1
Bahamas	Snapper, fresh or chilled	Imports	Snapper	Live, fresh or chilled	NA	Snapper	Fish	1	112.04	0	0	0	0	0	0	0	0	0	0	0	0	0	0	0	0	0	0	0	0	0	0	0	0	30	2	0	0	0	10	4	0	3	2	8	21	20	7	1	4
Bahamas	Snappers, frozen	Imports	Snapper	Frozen	NA	Snapper	Fish	1	111.35	0	0	0	0	0	0	0	0	0	0	0	0	0	0	0	0	0	0	0	0	0	0	0	0	4	1	0	0	0	1	1	1	4	8	12	5	19	2	23	15
Bahamas	Sockeye salmon (red salmon)(Oncorhynchus nerka), frozen	Imports	Sockeye salmon	Frozen	NA	Sockeye salmon	Fish	1	212.68	0	0	0	0	0	0	0	0	0	0	0	0	0	0	0	0	0	0	0	0	0	0	0	0	0	0	0	0	0	0	2	9	15	10	24	12	17	25	41	26
Bahamas	Tunas nei, frozen	Imports	Tuna	Frozen	NA	Tuna	Fish	1	401.01	0	0	0	0	0	0	0	0	0	0	0	0	0	0	0	0	0	0	0	0	0	2	9	9	14	18	98	17	8	4	3	15	13	9	5	6	17	16	13	41
Bahamas	Tunas prepared or preserved, not minced, in airtight containers	Imports	Tuna	Prepared or preserved	NA	Tuna	Fish	2.66	58936.2	0	0	0	0	0	0	0	0	0	0	0	0	0	0	0	0	0	0	0	0	0	2452.52	2771.72	2846.2	3630.9	2827.58	0	0	0	3186.68	3008.46	2941.96	3527.16	4136.3	2859.5	4373.04	4838.54	5115.18	4870.46	3915.52
Bahamas	Tunas prepared or preserved, not minced, nei	Imports	Tuna	Prepared or preserved	NA	Tuna	Fish	2.66	11331.9	0	0	0	0	0	0	0	0	0	0	0	0	0	0	0	0	0	0	0	0	0	0	0	0	0	5.32	3591	2846.2	3234.56	2.66	0	0	2.66	2.66	0	5.32	2.66	2.66	2.66	2.66
Bahamas	Tunas, fresh or chilled, nei	Imports	Tuna	Live, fresh or chilled	NA	Tuna	Fish	1	1188.2	0	0	0	0	0	0	0	0	0	0	0	0	0	0	0	0	0	0	0	0	0	5	12	12	4	10	4	4	2	3	5	3	10	37	47	27	29	62	128	172
Bahamas	Yellowfin tuna, fresh or chilled	Imports	Yellowfin tuna	Live, fresh or chilled	NA	Yellowfin tuna	Fish	1	101	0	0	0	0	0	0	0	0	0	0	0	0	0	0	0	0	0	0	0	0	0	0	0	1	0	1	3	4	4	3	4	8	8	7	12	12	12	8	7	7
Bahamas	Yellowfin tuna, frozen, nei	Imports	Yellowfin tuna	Frozen	NA	Yellowfin tuna	Fish	1	112.5	0	0	0	0	0	0	0	0	0	0	0	0	0	0	0	0	0	0	0	0	0	1	0	4	2	1	0	0	0	0	3	3	3	1	3	1	6	8	4	3
Bangladesh	Anchovies, Indian mackerels, seerfishes, jacks, crevalles, silver pomfrets, Pacific saury, scads, capelin, Kawakawa, bonitos, marlins, sailfishes, spearfish, frozen	Imports	Anchovies, Indian mackerels, seerfishes, jacks, crevalles, silver pomfrets, Pacific saury, scads, capelin, Kawakawa, bonitos, marlins, sailfishes, spearfish	Frozen	NA	Anchovies and Indian mackerels and seerfishes	Fish	1	2111.8	0	0	0	0	0	0	0	0	0	0	0	0	0	0	0	0	0	0	0	0	0	0	0	0	0	0	0	0	0	0	0	0	0	0	0	0	0	0	0	0
Bangladesh	Atlantic and Danube salmons, fresh or chilled	Imports	Atlantic salmon and Danube salmon	Live, fresh or chilled	NA	Atlantic salmon and Danube salmon	Fish	1	142.32	0	0	0	0	0	0	0	0	0	0	0	0	0	0	0	0	0	0	0	0	0	0	0	0	0	0	0	0	0	0	0	0	0	0	0	0	1	7	14	15
Bangladesh	Carps live	Imports	Carps	Live, fresh or chilled	NA	Carps	Fish	1	117.2	0	0	0	0	0	0	0	0	0	0	0	0	0	0	0	0	0	0	0	0	50	0	28	0	8	25	1	0	0	0	0	0	0	0	0	0	0	0	0	0
Bangladesh	Carps, fresh or chilled	Exports	Carps	Live, fresh or chilled	NA	Carps	Fish	1	271.09	0	0	0	0	0	0	0	0	0	0	0	0	0	0	0	0	0	0	0	0	0	0	0	0	0	0	0	0	0	0	0	0	0	0	0	0	0	0	0	0
Bangladesh	Carps, fresh or chilled	Imports	Carps	Live, fresh or chilled	NA	Carps	Fish	1	25017.4	0	0	0	0	0	0	0	0	0	0	0	0	0	0	0	0	0	0	0	0	0	0	0	0	0	0	0	0	0	0	0	0	0	0	0	0	0	0	0	0
Bangladesh	Carps, frozen	Exports	Carps	Frozen	NA	Carps	Fish	1	1690.9	0	0	0	0	0	0	0	0	0	0	0	0	0	0	0	0	0	0	0	0	0	0	0	0	0	0	0	0	0	0	0	0	0	0	0	0	0	0	0	0
Bangladesh	Carps, frozen	Imports	Carps	Frozen	NA	Carps	Fish	1	2646	0	0	0	0	0	0	0	0	0	0	0	0	0	0	0	0	0	0	0	0	0	0	0	0	0	0	0	0	0	0	0	0	0	0	0	0	0	0	0	0
Bangladesh	Carps, eels and snakeheads, fillets, fresh or chilled	Exports	Carps, eels and snakeheads	Live, fresh or chilled	Fillets	Carps and eels and snakeheads	Fish	1.25	1100	0	0	0	0	0	0	0	0	0	0	0	0	0	0	0	0	0	0	0	0	0	0	0	0	0	0	0	0	0	0	0	0	0	0	0	0	0	0	0	0
Bangladesh	Carps, eels and snakeheads, fillets, frozen	Exports	Carps, eels and snakeheads	Frozen	Fillets	Carps and eels and snakeheads	Fish	1.25	228.15	0	0	0	0	0	0	0	0	0	0	0	0	0	0	0	0	0	0	0	0	0	0	0	0	0	0	0	0	0	0	0	0	0	0	0	0	0	0	0	0
Bangladesh	Catfish fillets, fresh or chilled	Imports	Catfish	Live, fresh or chilled	Fillets	Catfish	Fish	1.25	333.75	0	0	0	0	0	0	0	0	0	0	0	0	0	0	0	0	0	0	0	0	0	0	0	0	0	0	0	0	0	0	0	0	0	0	0	0	0	3.75	0	0
Bangladesh	Catfish fillets, frozen	Exports	Catfish	Frozen	Fillets	Catfish	Fish	1.25	286.7	0	0	0	0	0	0	0	0	0	0	0	0	0	0	0	0	0	0	0	0	0	0	0	0	0	0	0	0	0	0	0	0	0	0	0	0	0	0	0	0
Bangladesh	Catfish fillets, frozen	Imports	Catfish	Frozen	Fillets	Catfish	Fish	1.25	304.137	0	0	0	0	0	0	0	0	0	0	0	0	0	0	0	0	0	0	0	0	0	0	0	0	0	0	0	0	0	0	0	0	0	0	0	0	0	0	26.25	27.5
Bangladesh	Catfish, fresh or chilled	Imports	Catfish	Live, fresh or chilled	NA	Catfish	Fish	1	126.37	0	0	0	0	0	0	0	0	0	0	0	0	0	0	0	0	0	0	0	0	0	0	0	0	0	0	0	0	0	0	0	0	0	0	0	0	86	0	0	0
Bangladesh	Catfish, frozen	Exports	Catfish	Frozen	NA	Catfish	Fish	1	3196.29	0	0	0	0	0	0	0	0	0	0	0	0	0	0	0	0	0	0	0	0	0	0	0	0	0	0	0	0	0	0	0	0	0	0	0	0	5	0	0	0
Bangladesh	Catfish, frozen	Imports	Catfish	Frozen	NA	Catfish	Fish	1	3266.81	0	0	0	0	0	0	0	0	0	0	0	0	0	0	0	0	0	0	0	0	0	0	0	0	0	0	0	0	0	0	0	0	0	0	0	0	27	140	100	0
Bangladesh	Cuttlefishes, frozen	Exports	Cuttlefish	Frozen	NA	Cephalopod	Cephalopod	1	120.99	0	0	0	0	0	0	0	0	0	0	0	0	0	0	0	0	0	0	0	0	0	0	0	0	0	0	0	0	0	0	0	0	0	0	0	0	0	0	0	0
Bangladesh	Cuttlefish and squid, other than live, fresh or chilled	Exports	Cuttlefish and squid	Live, fresh or chilled	NA	Cephalopod	Cephalopod	1	4135	0	0	0	0	0	0	0	0	0	0	0	0	0	0	0	0	0	0	0	0	0	0	0	0	0	0	52	56	124	100	126	368	679	462	0	3	159	775	538	161
Bangladesh	Cuttlefishes and squids, frozen, nei	Exports	Cuttlefish and squid	Frozen	NA	Cephalopod	Cephalopod	1	3501.39	0	0	0	0	0	0	0	0	0	0	0	0	0	0	0	0	0	0	0	0	0	0	0	0	0	0	0	0	0	0	0	0	0	0	0	0	0	0	0	0
Bangladesh	Cuttlefishes and squids, live, fresh or chilled, nei	Exports	Cuttlefish and squid	Live, fresh or chilled	NA	Cephalopod	Cephalopod	1	15203	0	0	0	0	0	0	0	0	0	0	0	0	0	0	0	0	0	0	0	0	0	0	0	0	0	0	50	40	2478	1266	1397	2184	1600	1569	1248	993	190	387	900	401
Bangladesh	Miscellaneous coastal fish, nei, frozen	Imports	Coastal fish	Frozen	NA	Coastal fish	Fish	1	377.71	0	0	0	0	0	0	0	0	0	0	0	0	0	0	0	0	0	0	0	0	0	0	0	0	0	0	0	0	0	0	0	0	0	0	0	0	0	0	0	0
Bangladesh	Cods nei, dried, whether or not salted	Exports	Cod	Dried	NA	Cod	Fish	2.82	1951.44	0	0	0	0	0	0	42.3	0	0	78.96	8.46	62.04	0	0	0	0	0	0	0	0	0	0	0	0	0	0	0	132.54	56.4	121.26	59.22	121.26	0	16.92	22.56	22.56	188.94	208.68	141	414.54
Bangladesh	Cods nei, dried, whether or not salted	Imports	Cod	Dried	NA	Cod	Fish	2.82	1060.26	0	0	0	0	0	0	0	0	0	0	0	0	0	0	0	0	0	0	0	0	0	0	11.28	0	0	0	0	0	0	0	0	0	0	0	0	0	0	31.02	84.6	177.66
Bangladesh	Cods nei, frozen	Exports	Cod	Frozen	NA	Cod	Fish	1	147	0	0	0	0	0	0	0	0	0	0	0	0	0	0	0	0	0	0	0	0	0	0	0	0	0	0	0	0	0	0	0	0	0	0	115	32	0	0	0	0
Bangladesh	Gadiformes nei, frozen	Exports	Cod and hake and haddock	Frozen	NA	Cod and hake and haddock	Fish	1	4916.15	0	0	0	0	0	0	0	0	0	0	0	0	0	0	0	0	0	0	0	0	0	0	0	0	0	0	0	0	0	0	0	0	0	0	0	0	1539	1556	482	0
Bangladesh	Gadiformes nei, frozen	Imports	Cod and hake and haddock	Frozen	NA	Cod and hake and haddock	Fish	1	2424.6	0	0	0	0	0	0	0	0	0	0	0	0	0	0	0	0	0	0	0	0	0	0	0	0	0	0	0	0	0	0	0	0	0	0	0	0	2	408	425	529
Bangladesh	Gadiformes, fresh or chilled, nei	Imports	Cod and hake and haddock	Live, fresh or chilled	NA	Cod and hake and haddock	Fish	1	5669.55	0	0	0	0	0	0	0	0	0	0	0	0	0	0	0	0	0	0	0	0	0	0	0	0	0	0	0	0	0	0	0	0	0	0	0	0	0	0	0	14
Bangladesh	Common sole (Solea Solea), frozen	Exports	Common sole (Solea Solea)	Frozen	NA	Common sole	Fish	1	4945.76	0	0	0	0	0	0	0	0	0	0	0	0	0	0	0	0	0	0	0	0	0	0	0	0	0	0	9	0	58	347	307	1731	635	448	12	0	0	14	578	641
Bangladesh	Croakers, frozen	Imports	Croaker	Frozen	NA	Croaker	Fish	1	452.4	0	0	0	0	0	0	0	0	0	0	0	0	0	0	0	0	0	0	0	0	0	0	0	0	0	0	0	0	0	0	0	0	0	0	0	0	0	0	0	0
Bangladesh	American/European lobsters (Homarus spp.), live, fresh or chilled, nei	Exports	American/European lobsters (Homarus spp.)	Live, fresh or chilled	NA	Crustacean	Crustacean	1	212.62	0	0	0	0	0	0	0	0	0	0	0	0	0	0	0	0	0	0	0	0	0	0	0	0	20	0	1	189	0	0	0	0	0	0	0	0	0	0	0	0
Bangladesh	American/European lobsters (Homarus spp.), not frozen	Exports	American/European lobsters (Homarus spp.)	NA	NA	Crustacean	Crustacean	1	322	0	0	0	0	0	0	0	0	0	0	0	0	0	0	0	0	0	0	0	0	0	0	0	0	0	0	0	0	290	0	29	0	0	0	0	0	0	0	0	0
Bangladesh	Crabs nei, frozen	Exports	Crab	Frozen	NA	Crustacean	Crustacean	1	3610.28	0	0	0	0	0	0	0	0	0	0	0	0	0	76	18	0	0	0	0	0	5	0	0	0	0	10	0	7	53	18	0	16	89	256	392	260	29	53	105	705
Bangladesh	Crabs, live	Exports	Crab	Live, fresh or chilled	NA	Crustacean	Crustacean	1	2075.91	0	0	0	0	0	0	0	0	0	0	0	0	0	0	0	0	0	0	0	0	0	0	0	0	0	0	0	0	0	0	0	0	0	0	0	0	0	0	0	0
Bangladesh	Crabs, not frozen	Exports	Crab	NA	NA	Crustacean	Crustacean	1	49381	0	0	1	1	0	0	0	0	0	0	0	0	0	0	0	0	0	0	0	0	0	0	0	0	0	0	191	1121	1800	3078	2040	2507	2407	3462	3044	3000	2602	5553	6850	2942
Bangladesh	Crabs, peeled or not, live, fresh or chilled, nei	Exports	Crab	Live, fresh or chilled	NA	Crustacean	Crustacean	1	18937	0	0	0	0	0	0	0	0	0	0	0	0	0	0	0	0	0	0	0	0	0	0	0	0	0	0	0	0	0	0	0	0	0	0	0	0	0	0	0	0
Bangladesh	Crustaceans nei, even smoked, frozen	Exports	Crustaceans	Smoked	NA	Crustacean	Crustacean	2	11525.7	0	0	0	0	0	0	0	0	0	0	0	0	0	0	0	640	70	440	1082	428	236	220	308	972	214	0	94	240	76	164	90	148	22	154	180	122	260	568	882	0
Bangladesh	Crustaceans, live, fresh, chilled or boiled in water, nei	Exports	Crustaceans	Live, fresh or chilled	NA	Crustacean	Crustacean	1	5418.42	0	0	0	0	0	0	0	0	0	0	0	0	0	4	9	0	1000	1932	2080	81	56	5	128	0	0	41	14	21	0	0	0	0	17	1	29	0	0	0	0	0
Bangladesh	Crustaceans, live, fresh, chilled or boiled in water, nei	Imports	Crustaceans	Live, fresh or chilled	NA	Crustacean	Crustacean	1	150	0	0	0	0	0	0	0	0	0	0	0	0	0	0	0	0	0	0	0	0	0	0	0	0	120	26	3	1	0	0	0	0	0	0	0	0	0	0	0	0
Bangladesh	Crustaceans and molluscs, fresh, frozen, dried, salted, etc.	Exports	Crustaceans and molluscs	Dried	NA	Crustacean	Crustacean	2.54	1617.98	0	0	2.54	0	368.3	2.54	22.86	370.84	53.34	167.64	55.88	276.86	215.9	0	0	81.28	0	0	0	0	0	0	0	0	0	0	0	0	0	0	0	0	0	0	0	0	0	0	0	0
Bangladesh	Freshwater crustaceans nei, live, fresh or chilled	Exports	Freshwater crustacean	Live, fresh or chilled	NA	Crustacean	Crustacean	1	238	0	0	0	0	0	0	0	0	0	0	0	0	0	0	0	0	0	0	0	0	0	0	0	0	0	0	0	0	0	0	0	0	0	0	0	0	0	0	0	0
Bangladesh	Rock lobster and other sea crawfish (Palinurus, Panulirus, Jasus), even smoked, frozen, nei	Exports	Lobster	Smoked	NA	Crustacean	Crustacean	2	517.18	0	0	0	0	0	0	0	0	0	0	0	0	0	0	38	0	0	0	0	0	0	0	0	0	32	0	0	0	0	0	0	0	40	124	4	2	4	2	10	204
Bangladesh	Rock lobster and other sea crawfish, not frozen	Exports	Lobster	NA	NA	Crustacean	Crustacean	1	278	0	0	0	0	0	0	0	0	0	0	0	0	0	0	0	0	0	0	0	0	0	0	0	0	6	0	0	23	8	0	14	171	31	16	7	0	0	2	0	0
Bangladesh	Shrimps and prawns, dried, salted or in brine, smoked nei	Exports	Shrimps and prawns	Dried	NA	Crustacean	Crustacean	2.54	1049.3	0	17.78	68.58	45.72	0	0	106.68	129.54	266.7	213.36	0	63.5	53.34	0	0	0	0	0	0	30.48	0	0	0	0	0	0	0	0	0	0	0	0	0	0	0	0	0	0	0	0
Bangladesh	Shrimps and prawns, frozen, nei	Exports	Shrimps and prawns	Frozen	NA	Crustacean	Crustacean	1	925178	3825	2707	2163	4131	8564	6757	8028	11430	14563	22255	17448	20113	20017	20585	25996	22203	23849	25191	31314	27741	27579	31425	22875	20127	28514	33441	29214	32899	39902	37714	43205	64985	55208	39644	47802	50000	1763	0	0	0
Bangladesh	Shrimps and prawns, frozen, nei	Imports	Shrimps and prawns	Frozen	NA	Crustacean	Crustacean	1	2787	0	0	0	0	0	0	0	0	0	0	0	0	0	0	0	0	0	0	0	0	43	34	57	9	10	15	78	18	483	207	48	17	88	1045	222	337	76	0	0	0
Bangladesh	Shrimps and prawns, live, fresh or chilled, nei	Exports	Shrimps and prawns	Live, fresh or chilled	NA	Crustacean	Crustacean	1	3595	0	691	240	171	134	120	24	23	397	0	35	26	0	26	0	0	0	0	0	150	157	89	104	0	150	91	245	114	0	5	8	0	92	123	110	0	0	0	0	0
Bangladesh	Shrimps and prawns, not frozen, nei	Exports	Shrimps and prawns	NA	NA	Crustacean	Crustacean	1	149	0	0	0	0	0	0	0	0	0	0	0	0	0	0	0	0	0	0	0	0	0	0	0	0	0	0	0	0	0	0	23	3	0	0	0	0	0	0	0	0
Bangladesh	Shrimps and prawns, other than coldwater, even smoked, frozen	Exports	Shrimps and prawns	Smoked	NA	Crustacean	Crustacean	2	438347	0	0	0	0	0	0	0	0	0	0	0	0	0	0	0	0	0	0	0	0	0	0	0	0	0	0	0	0	0	0	0	0	0	0	0	0	58962	86762	88556	67378
Bangladesh	Shrimps and prawns, other than coldwater, even smoked, frozen	Imports	Shrimps and prawns	Smoked	NA	Crustacean	Crustacean	2	2588.88	0	0	0	0	0	0	0	0	0	0	0	0	0	0	0	0	0	0	0	0	0	0	0	0	0	0	0	0	0	0	0	0	0	0	0	0	112	714	696	708
Bangladesh	Shrimps and prawns, peeled, frozen	Exports	Shrimps and prawns	Frozen	Peeled	Crustacean	Crustacean	1.21	271.367	0	0	0	0	0	0	0	0	0	0	0	0	0	0	0	0	0	0	0	0	0	0	0	0	0	0	0	0	0	0	0	0	0	0	0	0	0	0	0	0
Bangladesh	Shrimps and prawns, prep. or pres., in airtight containers	Exports	Shrimps and prawns	Prepared or preserved	NA	Crustacean	Crustacean	2.27	2068.42	0	0	0	0	0	0	0	0	0	0	0	0	0	0	0	0	0	0	0	0	0	0	0	0	0	0	0	0	0	0	0	0	0	0	0	0	0	43.13	0	0
Bangladesh	Shrimps and prawns, prep. or pres., not in airtight containers	Exports	Shrimps and prawns	Prepared or preserved	NA	Crustacean	Crustacean	2.27	15352.2	0	0	0	0	0	0	0	0	0	0	0	0	0	0	0	0	0	0	0	0	0	0	0	0	0	0	0	0	0	0	0	0	0	0	0	0	385.9	2036.19	2270	662.84
Bangladesh	Shrimps, prawns, prepared or preserved, nei	Exports	Shrimps and prawns	Prepared or preserved	NA	Crustacean	Crustacean	2.27	3475.37	0	0	0	0	0	0	0	0	0	0	9.08	0	0	0	0	0	0	0	0	0	0	0	0	0	0	0	0	0	0	0	0	138.47	419.95	880.76	869.41	1135	22.7	0	0	0
Bangladesh	Shrimps, prawns, prepared or preserved, nei	Imports	Shrimps and prawns	Prepared or preserved	NA	Crustacean	Crustacean	2.27	1949.93	0	0	0	0	0	0	0	0	0	0	0	0	0	0	0	0	0	0	0	0	0	0	0	0	0	0	215.65	81.72	192.95	27.24	431.3	276.94	63.56	6.81	65.83	456.27	131.66	0	0	0
Bangladesh	Cold-water shrimps and prawns (Pandalus spp., Crangon crangon), frozen, even smoked, whether in shell or not	Exports	Shrimps and prawns (Pandalus spp.)	Smoked	In shell or not	Crustacean	Crustacean	2.42	906.943	0	0	0	0	0	0	0	0	0	0	0	0	0	0	0	0	0	0	0	0	0	0	0	0	0	0	0	0	0	0	0	0	0	0	0	0	0	0	0	0
Bangladesh	Shrimps and prawns (Penaeus spp.), frozen	Exports	Shrimps and prawns (Penaeus spp.)	Frozen	NA	Crustacean	Crustacean	1	66958.4	0	0	0	0	0	0	0	0	0	0	0	0	0	0	0	0	0	0	0	0	0	0	0	0	0	0	0	0	0	0	0	0	0	0	0	0	0	0	0	0
Bangladesh	Shrimps and prawns (Penaeus spp.), frozen	Imports	Shrimps and prawns (Penaeus spp.)	Frozen	NA	Crustacean	Crustacean	1	137.4	0	0	0	0	0	0	0	0	0	0	0	0	0	0	0	0	0	0	0	0	0	0	0	0	0	0	0	0	0	0	0	0	0	0	0	0	0	0	0	0
Bangladesh	Miscellaneous demersal fish, nei, frozen	Imports	Demersal fish	Frozen	NA	Demersal fish	Fish	1	387.98	0	0	0	0	0	0	0	0	0	0	0	0	0	0	0	0	0	0	0	0	0	0	0	0	0	0	0	0	0	0	0	0	0	0	0	0	0	0	0	0
Bangladesh	Miscellaneous diadromous fish, nei, frozen	Imports	Diadromous fish	Frozen	NA	Diadromous fish	Fish	1	533.06	0	0	0	0	0	0	0	0	0	0	0	0	0	0	0	0	0	0	0	0	0	0	0	0	0	0	0	0	0	0	0	0	0	0	0	0	0	0	0	0
Bangladesh	Eels and elvers live	Exports	Eels	Live, fresh or chilled	NA	Eels	Fish	1	28431.3	0	0	0	0	0	0	0	0	0	0	0	0	0	0	0	0	0	0	0	0	0	0	0	0	0	6	110	232	330	388	467	826	1330	2143	2217	2300	2498	4543	2150	2247
Bangladesh	Eels, frozen	Exports	Eels	Frozen	NA	Eels	Fish	1	1719.86	0	0	0	0	0	0	0	0	0	0	0	0	0	10	0	0	0	0	0	0	0	0	0	0	0	0	0	0	0	24	24	177	261	148	0	3	0	0	98	39
Bangladesh	Euthynnus excl. skipjack or stripe-bellied bonitos, frozen	Imports	Euthynnus other than skipjack	Frozen	NA	Euthynnus other than skipjack	Fish	1	137	0	0	0	0	0	0	0	0	0	0	0	0	0	0	0	0	0	0	0	0	0	0	0	0	0	0	0	0	0	0	0	0	0	0	0	0	0	0	0	0
Bangladesh	Fish dried, whether or not salted, nei	Exports	Fish	Dried	NA	Fish	Fish	2.82	64140.6	217.14	28.2	166.38	569.64	1178.76	1294.38	1080.06	1192.86	1119.54	1153.38	1880.94	2583.12	2292.66	995.46	1288.74	282	225.6	2639.52	141	2800.26	2986.38	2653.62	2394.18	3474.24	2281.38	1954.26	1001.1	637.32	772.68	2106.54	1548.18	1652.52	1057.5	817.8	831.9	592.2	789.6	987	1003.92	987
Bangladesh	Fish dried, whether or not salted, nei	Imports	Fish	Dried	NA	Fish	Fish	2.82	118053	0	0	0	28.2	0	0	0	0	0	0	0	0	0	0	0	0	0	0	0	0	0	0	0	39.48	98.7	425.82	485.04	262.26	1018.02	0	0	0	6751.08	3572.94	2616.96	2710.02	1638.42	933.42	12963.5	20896.2
Bangladesh	Fish fillets, dried, salted or in brine, nei	Exports	Fish	Dried	Fillets	Fish	Fish	2.82	26219	0	0	0	0	0	0	0	0	0	0	0	0	0	1446.66	1708.92	2679	846	70.5	0	28.2	0	0	0	0	0	141	50.76	524.52	1085.7	2098.08	2929.98	812.16	879.84	769.86	1063.14	2050.14	566.82	0	0	0
Bangladesh	Fish fillets, dried, salted or in brine, nei	Imports	Fish	Dried	Fillets	Fish	Fish	2.82	5758.44	0	0	0	0	0	0	0	0	0	0	0	0	0	0	0	0	0	0	0	0	0	0	5.64	0	0	0	135.36	180.48	2.82	0	0	0	0	0	0	0	0	0	0	0
Bangladesh	Fish fillets, fresh or chilled, nei	Exports	Fish	Live, fresh or chilled	Fillets	Fish	Fish	1.25	6350	0	22.5	1.25	0	0	0	1.25	1.25	5	35	0	10	0	0	0	0	87.5	0	0	0	0	0	0	0	32.5	127.5	98.75	663.75	1231.25	1372.5	625	1218.75	0	0	0	0	0	5	1.25	48.75
Bangladesh	Fish fillets, frozen, nei	Exports	Fish	Frozen	Fillets	Fish	Fish	1.25	8321.46	0	15	0	6.25	0	0	105	165	6.25	2.5	0	0	0	0	0	0	3621.25	0	0	0	0	0	127.5	0	0	27.5	192.5	466.25	213.75	462.5	478.75	2296.25	0	0	0	1.25	0	0	0	0
Bangladesh	Fish fillets, frozen, nei	Imports	Fish	Frozen	Fillets	Fish	Fish	1.25	2514.66	0	0	0	0	0	0	0	0	0	0	0	0	0	0	0	0	0	0	0	0	0	0	0	0	75	288.75	121.25	187.5	1027.5	626.25	67.5	0	0	0	3.75	3.75	12.5	33.75	15	0
Bangladesh	Fish heads, tail, maws etc., smoked, dried, salted, or in brine	Exports	Fish	Smoked	Heads, tails, maws	Fish	Fish	10	29811.5	0	0	0	330	0	0	340	280	210	610	800	530	2620	390	700	0	0	0	0	2450	2260	1690	960	1540	2620	0	0	0	0	0	0	0	0	0	0	0	1080	1900	2360	1600
Bangladesh	Fish heads, tails, maws, tongues, nei frozen	Imports	Fish	Frozen	Heads, tails, maws	Fish	Fish	5	680	0	0	0	0	0	0	0	0	0	0	0	0	0	0	0	0	0	0	0	0	0	0	0	0	0	0	0	0	0	0	0	0	0	0	0	0	0	0	140	0
Bangladesh	Fish live, nei	Exports	Fish	Live, fresh or chilled	NA	Fish	Fish	1	24000.1	0	0	0	0	0	0	0	0	0	0	0	0	0	0	0	0	300	0	4	0	0	0	0	0	0	0	0	0	1	0	0	0	0	0	494	1196	1503	1879	500	0
Bangladesh	Fish live, nei	Imports	Fish	Live, fresh or chilled	NA	Fish	Fish	1	1050	0	0	0	0	0	0	0	0	0	0	0	0	0	0	0	0	0	0	1	309	347	0	83	15	40	8	8	1	1	1	0	0	0	1	4	11	14	34	5	2
Bangladesh	Fish meat, whether or not minced, frozen, nei	Exports	Fish	Frozen	Meat	Fish	Fish	1.25	3230.41	0	0	0	0	0	0	0	0	0	0	0	0	0	0	0	0	0	0	361.25	0	87.5	198.75	93.75	0	0	13.75	46.25	1120	567.5	286.25	25	36.25	58.75	0	1.25	0	0	0	0	0
Bangladesh	Fish meat, whether or not minced, frozen, nei	Imports	Fish	Frozen	Meat	Fish	Fish	1.25	961.05	0	0	0	0	0	0	0	0	0	0	0	0	0	0	0	0	0	0	0	3.75	1.25	1.25	0	1.25	0	1.25	6.25	0	10	0	0	3.75	18.75	0	0	0	0	12.5	5	0
Bangladesh	Fish minced nei, prepared or preserved	Imports	Fish	Prepared or preserved	Minced	Fish	Fish	2.66	4741.96	0	0	0	0	0	0	0	0	0	0	0	0	0	0	0	0	0	0	0	0	10.64	0	0	0	0	2.66	0	2.66	5.32	2.66	2.66	7.98	0	13.3	2.66	7.98	15.96	34.58	47.88	63.84
Bangladesh	Fish nei, dried and salted	Imports	Fish	Dried	NA	Fish	Fish	2.82	2120.64	0	0	0	0	0	0	0	0	0	0	0	0	0	0	0	0	0	0	0	0	19.74	0	569.64	0	0	0	0	0	0	0	1128	0	0	0	0	0	0	0	403.26	0
Bangladesh	Fish nei, dried, unsalted	Exports	Fish	Dried	NA	Fish	Fish	2.82	7137.42	0	0	0	0	0	0	8.46	33.84	95.88	31.02	219.96	107.16	391.98	5.64	0	0	0	0	3713.94	115.62	250.98	321.48	242.52	386.34	606.3	0	0	0	0	0	217.14	389.16	0	0	0	0	0	0	0	0
Bangladesh	Fish nei, dried, unsalted	Imports	Fish	Dried	NA	Fish	Fish	2.82	10075.9	0	0	0	0	0	0	0	0	0	0	0	0	0	0	0	0	0	0	0	0	2.82	0	22.56	0	0	0	0	0	0	0	913.68	9136.8	0	0	0	0	0	0	0	0
Bangladesh	Fish nei, prepared or preserved, not minced	Imports	Fish	Prepared or preserved	NA	Fish	Fish	2.66	4002.53	0	0	0	0	0	0	0	0	0	0	0	0	0	0	0	2.66	106.4	93.1	93.1	0	0	0	0	2.66	0	2.66	0	2.66	2.66	2.66	0	5.32	0	0	0	2.66	26.6	7.98	10.64	37.24
Bangladesh	Fish nei, salted or in brine	Exports	Fish	Salted	NA	Fish	Fish	2.82	4909.62	0	0	0	0	0	0	0	0	0	0	0	0	0	1001.1	1201.32	0	0	0	0	28.2	0	0	56.4	0	8.46	284.82	262.26	8.46	101.52	81.78	81.78	33.84	146.64	0	0	0	183.3	118.44	736.02	166.38
Bangladesh	Fish nei, smoked	Exports	Fish	Smoked	NA	Fish	Fish	2.5	5490	0	62.5	202.5	112.5	0	0	2.5	0	7.5	0	40	62.5	0	0	0	530	425	750	450	0	0	10	0	0	0	547.5	507.5	300	0	265	0	0	0	252.5	310	450	107.5	30	20	20
Bangladesh	Fish, fresh or chilled, nei	Exports	Fish	Live, fresh or chilled	NA	Fish	Fish	1	60875.5	0	0	11	15	0	0	1	6	485	63	6	5	0	0	0	0	120	0	0	0	0	0	13	0	26	14	2	134	881	3402	3671	5565	7284	4512	5999	11000	2728	2171	2100	2147
Bangladesh	Fish, fresh or chilled, nei	Imports	Fish	Live, fresh or chilled	NA	Fish	Fish	1	20119.6	0	0	0	0	0	0	0	0	0	0	0	0	0	4	2	4	20	15	0	0	0	0	5	2	96	4	537	0	0	0	0	6	199	265	0	1352	13032	381	120	6
Bangladesh	Fish, frozen, nei	Exports	Fish	Frozen	NA	Fish	Fish	1	190914	0	91	184	147	396	602	737	2165	4601	3991	6324	4986	5708	3341	3806	5395	2604	2704	3125	10069	9982	12548	6217	6395	8362	5954	6352	1851	417	591	517	1887	8900	4659	8167	9300	4715	3637	8111	7983
Bangladesh	Fish, frozen, nei	Imports	Fish	Frozen	NA	Fish	Fish	1	408591	0	0	0	0	20	0	0	0	0	0	0	0	0	0	0	5	0	0	0	0	0	2	1	1526	82	2	203	3	3	12	12	3	24	358	3138	2739	8591	47689	52893	66841
Bangladesh	Fish, sauce	Imports	Fish	Sauce	NA	Fish	Fish	0.5	68.825	0	0	0	0	0	0	0	0	0	0	0	0	0	0	0	0	0	0	0	0	0	0	0	0	0	0	0	0	0	0	0	0	0	0	0	0	0	0	0	0
Bangladesh	Flatfish nei, frozen	Exports	Flatfish	Frozen	NA	Flatfish	Fish	1	2852.87	0	0	0	0	0	0	0	0	0	0	0	0	0	0	0	0	0	0	0	0	0	9	0	0	0	0	157	71	4	0	8	0	49	0	0	0	0	28	6	0
Bangladesh	Flatfish nei, frozen	Imports	Flatfish	Frozen	NA	Flatfish	Fish	1	13548	0	0	0	0	0	0	0	0	0	0	0	0	0	0	0	0	0	0	0	0	0	0	0	0	800	503	600	239	108	1302	2669	3358	1347	1076	297	0	50	0	116	51
Bangladesh	Flatfish, fresh or chilled, nei	Exports	Flatfish	Live, fresh or chilled	NA	Flatfish	Fish	1	518.58	0	0	0	0	0	0	0	0	0	0	0	0	0	0	0	0	0	0	0	0	0	0	0	0	0	0	0	0	0	0	0	0	4	0	23	4	7	8	0	0
Bangladesh	Flatfish, fresh or chilled, nei	Imports	Flatfish	Live, fresh or chilled	NA	Flatfish	Fish	1	2648	0	0	0	0	0	0	0	0	0	0	0	0	0	0	0	0	0	0	14	159	1850	598	17	0	0	0	0	0	0	0	0	0	0	10	0	0	0	0	0	0
Bangladesh	Freshwater fish fillets, fresh or chilled, nei	Exports	Freshwater fish	Live, fresh or chilled	Fillets	Freshwater fish	Fish	1.25	272.5	0	0	0	0	0	0	0	0	0	0	0	0	0	0	0	0	0	0	0	0	0	0	0	0	0	0	0	0	0	0	0	0	0	0	0	0	80	77.5	55	56.25
Bangladesh	Freshwater fish nei, frozen	Exports	Freshwater fish	Frozen	NA	Freshwater fish	Fish	1	6722.32	0	0	0	0	0	0	0	0	0	0	0	0	0	0	0	0	0	0	0	0	0	0	0	0	0	0	0	0	0	0	0	0	0	0	0	0	0	0	0	0
Bangladesh	Freshwater fish nei, frozen	Imports	Freshwater fish	Frozen	NA	Freshwater fish	Fish	1	154.1	0	0	0	0	0	0	0	0	0	0	0	0	0	0	0	0	0	0	0	0	0	0	0	0	0	0	0	0	0	0	0	0	0	0	0	0	0	0	0	0
Bangladesh	Freshwater fish nei, live	Exports	Freshwater fish	Live, fresh or chilled	NA	Freshwater fish	Fish	1	311.2	0	0	0	0	0	0	0	0	0	0	0	0	0	0	0	0	0	0	0	0	0	0	0	0	0	0	0	0	0	0	0	0	0	0	0	0	0	0	0	0
Bangladesh	Grouper, frozen	Imports	Grouper	Frozen	NA	Grouper	Fish	1	171	0	0	0	0	0	0	0	0	0	0	0	0	0	0	0	0	0	0	0	0	0	0	0	0	0	0	0	0	0	0	0	0	0	0	0	0	0	0	0	0
Bangladesh	Hairtails, frozen	Exports	Hairtails	Frozen	NA	Hairtails	Fish	1	779.59	0	0	0	0	0	0	0	0	0	0	0	0	0	0	0	0	0	0	0	0	0	0	0	0	0	0	0	0	0	0	0	0	0	0	0	0	0	0	0	0
Bangladesh	Hairtails, frozen	Imports	Hairtails	Frozen	NA	Hairtails	Fish	1	147.12	0	0	0	0	0	0	0	0	0	0	0	0	0	0	0	0	0	0	0	0	0	0	0	0	0	0	0	0	0	0	0	0	0	0	0	0	0	0	0	0
Bangladesh	Halibuts nei, frozen	Exports	Halibut	Frozen	NA	Halibut	Fish	1	252	0	0	0	0	0	0	0	0	0	0	0	0	0	0	0	0	0	0	0	0	22	0	0	0	0	0	0	0	0	0	0	65	0	0	0	0	0	0	0	0
Bangladesh	Jack and horse mackerel, frozen	Imports	Jack and horse mackerel	Frozen	NA	Jack and horse mackerel	Fish	1	1723.89	0	0	0	0	0	0	0	0	0	0	0	0	0	0	0	0	0	0	0	0	0	0	0	0	0	0	0	0	0	0	0	0	0	0	0	0	0	10	0	0
Bangladesh	Jack and horse mackerels, fresh or chilled	Imports	Jack and horse mackerel	Live, fresh or chilled	NA	Jack and horse mackerel	Fish	1	255	0	0	0	0	0	0	0	0	0	0	0	0	0	0	0	0	0	0	0	0	0	0	0	0	0	0	0	0	0	0	0	0	0	0	0	0	0	0	0	0
Bangladesh	Lizardfish, frozen	Imports	Lizardfish	Frozen	NA	Lizardfish	Fish	1	159	0	0	0	0	0	0	0	0	0	0	0	0	0	0	0	0	0	0	0	0	0	0	0	0	0	0	0	0	0	0	0	0	0	0	0	0	0	0	0	0
Bangladesh	Mackerels nei, frozen	Exports	Mackerel	Frozen	NA	Mackerel	Fish	1	696.83	0	0	0	0	0	0	0	0	0	0	0	0	0	0	0	0	0	0	0	0	0	0	0	0	0	0	0	0	0	0	0	0	0	0	0	0	105	0	89	92
Bangladesh	Mackerels nei, frozen	Imports	Mackerel	Frozen	NA	Mackerel	Fish	1	1530.72	0	0	0	0	0	0	0	0	0	0	0	0	0	0	0	0	0	0	0	0	0	0	0	0	0	1	3	0	0	0	0	0	0	75	54	105	157	27	231	0
Bangladesh	Mackerels, nei, fresh or chilled	Imports	Mackerel	Live, fresh or chilled	NA	Mackerel	Fish	1	5293	0	0	0	0	0	0	0	0	0	0	0	0	0	0	0	0	0	0	0	0	0	0	0	0	0	1	0	0	0	0	0	0	0	0	0	0	0	0	0	0
Bangladesh	Marine fish nei, prepared or preserved, not minced	Exports	Marine fish	Prepared or preserved	NA	Marine fish	Fish	2.66	555.94	0	5.32	0	0	0	18.62	0	0	0	0	0	0	0	0	0	0	532	0	0	0	0	0	0	0	0	0	0	0	0	0	0	0	0	0	0	0	0	0	0	0
Bangladesh	Marine fish, fresh or chilled, nei	Exports	Marine fish	Live, fresh or chilled	NA	Marine fish	Fish	1	281.46	0	0	0	0	0	0	0	0	0	0	0	0	0	0	0	0	0	0	0	0	0	0	0	0	0	0	0	0	0	0	0	0	0	0	0	0	0	0	0	0
Bangladesh	Marine fish, frozen, nei	Exports	Marine fish	Frozen	NA	Marine fish	Fish	1	681.78	0	0	0	0	0	0	0	0	0	0	0	0	0	0	0	0	0	0	0	0	0	0	0	0	0	0	0	0	0	0	0	0	0	0	0	0	0	0	0	0
Bangladesh	Marine fish, frozen, nei	Imports	Marine fish	Frozen	NA	Marine fish	Fish	1	206.5	0	0	0	0	0	0	0	0	0	0	0	0	0	0	0	0	0	0	0	0	0	0	0	0	0	0	0	0	0	0	0	0	0	0	0	0	0	0	0	0
Bangladesh	Nile perch fillets, fresh or chilled	Exports	Nile perch	Live, fresh or chilled	Fillets	Nile perch	Fish	1.25	1741.25	0	0	0	0	0	0	0	0	0	0	0	0	0	0	0	0	0	0	0	0	0	0	0	0	0	0	0	0	0	0	0	0	0	0	0	0	113.75	338.75	312.5	276.25
Bangladesh	Nile perch (Lates niloticus) and snakeheads (Channa spp.), frozen	Exports	Nile perch (Lates niloticus) and snakeheads (Channa spp.)	Frozen	NA	Nile perch and snakeheads (Channa spp.)	Fish	1	4840.36	0	0	0	0	0	0	0	0	0	0	0	0	0	0	0	0	0	0	0	0	0	0	0	0	0	0	0	0	0	0	0	0	0	0	0	0	1908	1918	222	10
Bangladesh	Nile perch (Lates niloticus) and snakeheads (Channa spp.), frozen	Imports	Nile perch (Lates niloticus) and snakeheads (Channa spp.)	Frozen	NA	Nile perch and snakeheads (Channa spp.)	Fish	1	2053.04	0	0	0	0	0	0	0	0	0	0	0	0	0	0	0	0	0	0	0	0	0	0	0	0	0	0	0	0	0	0	0	0	0	0	0	0	35	12	0	0
Bangladesh	Nile perch and snakeheads (Channa spp.), fresh or chilled	Exports	Nile perch (Lates niloticus) and snakeheads (Channa spp.)	Live, fresh or chilled	NA	Nile perch and snakeheads (Channa spp.)	Fish	1	2659	0	0	0	0	0	0	0	0	0	0	0	0	0	0	0	0	0	0	0	0	0	0	0	0	0	0	0	0	0	0	0	0	0	0	0	0	1	0	0	0
Bangladesh	Nile perch and snakeheads (Channa spp.), fresh or chilled	Imports	Nile perch (Lates niloticus) and snakeheads (Channa spp.)	Live, fresh or chilled	NA	Nile perch and snakeheads (Channa spp.)	Fish	1	103601	0	0	0	0	0	0	0	0	0	0	0	0	0	0	0	0	0	0	0	0	0	0	0	0	0	0	0	0	0	0	0	0	0	0	0	0	4621	12825	18000	26465
Bangladesh	Pacific salmons, frozen, nei	Imports	Pacific salmons	Frozen	NA	Pacific salmons	Fish	1	793.75	0	0	0	0	0	0	0	0	0	0	0	0	0	0	0	0	0	0	0	0	6	0	73	0	38	12	325	0	0	21	0	1	0	0	0	0	11	17	0	14
Bangladesh	Miscellaneous pelagic fish, nei, fresh or chilled	Exports	Pelagic fish	Live, fresh or chilled	NA	Pelagic fish	Fish	1	112.21	0	0	0	0	0	0	0	0	0	0	0	0	0	0	0	0	0	0	0	0	0	0	0	0	0	0	0	0	0	0	0	0	0	0	0	0	0	0	0	0
Bangladesh	Plaices, frozen, nei	Exports	Plaice	Frozen	NA	Plaice	Fish	1	299.67	0	0	0	0	0	0	0	0	0	0	0	0	0	0	0	0	0	0	0	0	0	0	0	0	0	0	0	0	0	0	0	171	0	0	0	0	0	0	0	0
Bangladesh	Pomfrets, ocean breams, frozen	Exports	Pomfret and ocean breams	Frozen	NA	Pomfret and ocean breams	Fish	1	736.34	0	0	0	0	0	0	0	0	0	0	0	0	0	0	0	0	0	0	0	0	0	0	0	0	0	0	0	0	0	0	0	0	0	0	0	0	0	0	0	0
Bangladesh	Pomfrets, ocean breams, frozen	Imports	Pomfret and ocean breams	Frozen	NA	Pomfret and ocean breams	Fish	1	1338.28	0	0	0	0	0	0	0	0	0	0	0	0	0	0	0	0	0	0	0	0	0	0	0	0	0	0	0	0	0	0	0	0	0	0	0	0	0	0	0	0
Bangladesh	Rays and skates (Rajidae), frozen	Exports	Rays and skates (Rajidae)	Frozen	NA	Rays and skates (Rajidae)	Fish	1	141.14	0	0	0	0	0	0	0	0	0	0	0	0	0	0	0	0	0	0	0	0	0	0	0	0	0	0	0	0	0	0	0	0	0	0	0	0	0	0	0	0
Bangladesh	Saithe (=Pollock), fresh or chilled	Imports	Saithe (=Pollock)	Live, fresh or chilled	NA	Saithe (=Pollock)	Fish	1	1617	0	0	0	0	0	0	0	0	0	0	0	0	0	0	0	0	0	0	0	0	0	0	0	0	0	0	1617	0	0	0	0	0	0	0	0	0	0	0	0	0
Bangladesh	Salmonoids, fresh or chilled, nei	Exports	Salmonids	Live, fresh or chilled	NA	Salmonids	Fish	1	841	0	0	0	0	0	0	0	0	0	0	0	0	0	0	0	0	0	0	0	0	0	0	0	0	0	0	0	7	7	102	45	29	3	1	1	29	24	30	14	35
Bangladesh	Salmonoids, fresh or chilled, nei	Imports	Salmonids	Live, fresh or chilled	NA	Salmonids	Fish	1	58213.5	0	0	0	0	0	0	0	0	0	0	0	0	0	0	0	0	0	0	0	21	0	0	2	0	0	13	454	464	1389	0	0	0	850	5776	17713	12385	182	82	6000	8191
Bangladesh	Salmonoids, frozen	Exports	Salmonids	Frozen	NA	Salmonids	Fish	1	59053.1	0	0	0	0	0	0	0	0	0	0	0	0	0	97	0	0	80	0	0	22	0	0	0	0	0	0	19	1807	3827	7298	6137	4459	6173	6623	7823	7082	1846	2439	1047	776
Bangladesh	Salmonoids, frozen	Imports	Salmonids	Frozen	NA	Salmonids	Fish	1	4745.17	0	0	0	0	0	0	0	0	0	0	0	0	0	0	0	0	0	0	0	22	0	0	0	0	0	20	122	1460	120	20	47	992	595	584	323	208	6	2	26	4
Bangladesh	Sardines, sardinellas, brisling or sprats, fresh or chilled	Imports	Sardine, sardinella, sprat	Live, fresh or chilled	NA	Sardine and sardinella and sprat	Fish	1	2127.8	0	0	0	0	0	0	0	0	0	0	0	0	0	0	0	0	0	0	0	0	0	0	0	0	0	0	0	0	0	0	0	0	0	0	0	0	0	0	0	0
Bangladesh	Sardines, sardinellas, brisling or sprats, frozen	Exports	Sardine, sardinella, sprat	Frozen	NA	Sardine and sardinella and sprat	Fish	1	115.43	0	0	0	0	0	0	0	0	0	0	0	0	0	0	0	0	0	0	0	0	0	0	0	0	0	0	0	15	0	0	0	0	0	37	0	0	0	0	0	0
Bangladesh	Sardines, sardinellas, brisling or sprats, frozen	Imports	Sardine, sardinella, sprat	Frozen	NA	Sardine and sardinella and sprat	Fish	1	14638.9	0	0	0	0	0	0	0	0	0	0	0	0	0	0	0	0	0	0	0	0	0	0	0	0	0	0	116	19	19	0	0	0	0	313	1716	305	203	0	434	0
Bangladesh	Sardines, sardinellas, brisling or sprats, prep. or pres., not minced, nei	Imports	Sardine, sardinella, sprat	Prepared or preserved	NA	Sardine and sardinella and sprat	Fish	2.66	979.518	0	0	0	0	0	0	0	0	0	0	0	0	0	0	0	0	0	0	0	0	0	0	0	0	0	0	7.98	15.96	15.96	0	13.3	15.96	18.62	29.26	23.94	13.3	7.98	10.64	29.26	13.3
Bangladesh	Seabreams, frozen	Imports	Seabreams	Frozen	NA	Seabream	Fish	1	366	0	0	0	0	0	0	0	0	0	0	0	0	0	0	0	0	0	0	0	0	0	0	0	0	0	0	0	0	0	0	0	0	0	0	0	0	0	0	0	0
Bangladesh	Shads, nei, fresh or chilled	Exports	Shad	Live, fresh or chilled	NA	Shad	Fish	1	476.56	0	0	0	0	0	0	0	0	0	0	0	0	0	0	0	0	0	0	0	0	0	0	0	0	0	0	0	0	0	0	0	0	0	0	0	0	0	0	0	0
Bangladesh	Swordfish fillets, fresh or chilled	Exports	Swordfish	Live, fresh or chilled	Fillets	Swordfish	Fish	1.25	955	0	0	0	0	0	0	0	0	0	0	0	0	0	0	0	0	0	0	0	0	0	0	0	0	0	0	0	0	0	0	0	0	533.75	245	80	77.5	17.5	0	0	0
Bangladesh	Tilapias, fresh or chilled	Exports	Tilapia	Live, fresh or chilled	NA	Tilapia	Fish	1	2356.16	0	0	0	0	0	0	0	0	0	0	0	0	0	0	0	0	0	0	0	0	0	0	0	0	0	0	0	0	0	0	0	0	0	0	0	0	0	0	0	0
Bangladesh	Tilapias, frozen	Exports	Tilapia	Frozen	NA	Tilapia	Fish	1	1885.55	0	0	0	0	0	0	0	0	0	0	0	0	0	0	0	0	0	0	0	0	0	0	0	0	0	0	0	0	0	0	0	0	0	0	0	0	104	0	0	0
Bangladesh	Trouts and chars live	Exports	Trouts and chars	Live, fresh or chilled	NA	Trout and char	Fish	1	369	0	0	0	0	0	0	0	0	0	0	0	0	0	0	0	0	0	0	0	0	0	0	0	0	0	0	0	0	0	0	0	1	0	0	2	1	1	85	90	109
Bangladesh	Trouts and chars, fresh or chilled	Imports	Trouts and chars	Live, fresh or chilled	NA	Trout and char	Fish	1	6218	0	0	0	0	0	0	0	0	0	0	0	0	0	0	0	0	0	0	0	5	2	43	975	0	445	1503	3144	1	0	0	0	100	0	0	0	0	0	0	0	0
Bangladesh	Tunas nei, frozen	Exports	Tuna	Frozen	NA	Tuna	Fish	1	186	0	0	0	0	0	0	0	0	0	0	0	0	0	0	0	0	0	0	0	0	0	0	21	0	0	0	14	0	0	40	40	0	0	0	2	0	0	27	17	0
Bangladesh	Tunas nei, frozen	Imports	Tuna	Frozen	NA	Tuna	Fish	1	1253.03	0	0	0	0	0	0	0	0	0	0	0	0	0	0	0	0	0	0	0	0	0	0	0	25	0	0	0	0	0	0	3	1	0	0	13	0	0	0	62	36
Bangladesh	Tunas prepared or preserved, not minced, nei	Imports	Tuna	Prepared or preserved	NA	Tuna	Fish	2.66	2181.81	0	0	0	0	0	0	0	0	0	0	0	0	0	0	0	0	0	0	0	0	2.66	0	0	18.62	0	7.98	79.8	50.54	85.12	31.92	53.2	66.5	79.8	101.08	61.18	106.4	79.8	643.72	438.9	119.7
Barbados	Albacore (=Longfin tuna), fresh or chilled	Exports	Albacore	Live, fresh or chilled	NA	Albacore	Fish	1	192	0	0	0	0	0	0	0	0	0	0	0	0	0	0	0	0	0	0	0	0	0	0	0	0	6	0	20	9	84	73	0	0	0	0	0	0	0	0	0	0
Barbados	Albacore (=Longfin tuna), frozen, nei	Imports	Albacore	Frozen	NA	Albacore	Fish	1	132.07	0	0	0	0	0	0	0	0	0	0	0	0	0	0	0	0	0	0	0	0	0	0	0	0	18	40	4	10	12	30	3	0	0	1	0	5	5	0	1	2
Barbados	Anchovies, Indian mackerels, seerfishes, jacks, crevalles, silver pomfrets, Pacific saury, scads, capelin, Kawakawa, bonitos, marlins, sailfishes, spearfish, frozen	Imports	Anchovies, Indian mackerels, seerfishes, jacks, crevalles, silver pomfrets, Pacific saury, scads, capelin, Kawakawa, bonitos, marlins, sailfishes, spearfish	Frozen	NA	Anchovies and Indian mackerels and seerfishes	Fish	1	492.63	0	0	0	0	0	0	0	0	0	0	0	0	0	0	0	0	0	0	0	0	0	0	0	0	0	0	0	0	0	0	0	0	0	0	0	0	0	0	0	0
Barbados	Anchovies, prepared or preserved, not minced	Imports	Anchovy	Prepared or preserved	NA	Anchovy	Fish	2.66	282.332	0	0	0	0	0	0	0	0	0	0	0	0	0	0	0	0	0	0	0	0	0	0	0	0	15.96	13.3	15.96	18.62	10.64	18.62	18.62	18.62	15.96	10.64	10.64	10.64	13.3	13.3	10.64	15.96
Barbados	Cuttlefish and squid, other than live, fresh or chilled	Imports	Cuttlefish and squid	Live, fresh or chilled	NA	Cephalopod	Cephalopod	1	556.8	0	0	0	0	0	0	0	0	0	0	0	0	0	0	0	0	0	0	0	0	0	0	0	9	39	29	11	11	17	29	18	7	44	31	5	4	5	28	22	7
Barbados	Octopus, live, fresh or chilled	Imports	Octopus	Live, fresh or chilled	NA	Cephalopod	Cephalopod	1	121.03	0	0	0	0	0	0	0	0	0	0	0	0	0	0	0	0	0	0	0	0	0	0	0	0	0	6	5	2	0	0	7	22	15	12	9	3	3	4	1	27
Barbados	Octopus, other than live, fresh or chilled	Imports	Octopus	Live, fresh or chilled	NA	Cephalopod	Cephalopod	1	1037.89	0	0	0	0	0	0	0	0	0	0	0	0	0	0	0	0	0	0	0	0	0	0	0	0	77	55	29	77	67	77	91	23	13	27	14	73	42	60	124	15
Barbados	Cods nei, dried, whether or not salted	Imports	Cod	Dried	NA	Cod	Fish	2.82	38336.7	933.42	1037.76	967.26	0	327.12	1404.36	1426.92	0	0	933.42	924.96	987	758.58	1280.28	1195.68	955.98	882.66	507.6	521.7	544.26	628.86	671.16	360.96	924.96	1300.02	1497.42	1457.94	1269	1195.68	1488.96	2552.1	2444.94	1624.32	885.48	874.2	623.22	755.76	640.14	454.02	242.52
Barbados	Cods nei, salted or in brine	Imports	Cod	Salted	NA	Cod	Fish	2.82	425.82	0	0	0	0	0	0	0	0	0	0	0	0	0	0	0	0	0	0	0	0	0	0	0	0	19.74	11.28	31.02	129.72	124.08	28.2	19.74	14.1	22.56	2.82	0	0	0	0	22.56	0
Barbados	American/European lobsters (Homarus spp.), nei, even smoked, frozen	Imports	American/European lobsters (Homarus spp.)	Smoked	NA	Crustacean	Crustacean	2	848.6	0	0	0	0	0	0	0	0	0	0	0	0	0	0	0	0	0	0	0	0	0	0	0	0	12	32	10	18	28	18	34	8	12	6	40	36	42	42	76	92
Barbados	Crab meat nei, prepared or preserved	Imports	Crab	Prepared or preserved	Meat	Crustacean	Crustacean	5.9701	2127.8	0	0	0	0	0	0	0	0	0	0	0	0	0	0	0	0	0	0	0	0	0	0	0	0	59.701	53.7309	107.462	53.7309	71.6412	71.6412	107.462	107.462	143.282	65.6711	107.462	83.5814	101.492	83.5814	125.372	125.372
Barbados	Crabs nei, frozen	Imports	Crab	Frozen	NA	Crustacean	Crustacean	1	213.35	0	0	0	0	0	0	0	0	0	0	0	0	0	0	0	0	0	0	0	0	0	0	0	0	15	20	13	22	8	12	10	7	10	8	6	5	5	6	10	7
Barbados	Crustaceans nei, even smoked, frozen	Imports	Crustaceans	Smoked	NA	Crustacean	Crustacean	2	412.44	0	0	0	0	0	0	0	0	0	0	0	0	0	0	0	4	10	2	4	4	10	18	6	64	14	14	6	2	2	2	10	8	36	26	4	40	18	18	16	8
Barbados	Crustaceans nei, prepared or preserved	Imports	Crustaceans	Prepared or preserved	NA	Crustacean	Crustacean	2.27	345.63	0	0	0	0	0	0	0	0	0	0	0	0	0	0	0	6.81	4.54	4.54	11.35	9.08	11.35	15.89	6.81	43.13	9.08	6.81	13.62	22.7	9.08	2.27	15.89	4.54	2.27	2.27	4.54	6.81	9.08	4.54	6.81	4.54
Barbados	Crustaceans, live, fresh, chilled or boiled in water, nei	Imports	Crustaceans	Live, fresh or chilled	NA	Crustacean	Crustacean	1	288.17	0	0	0	0	0	0	0	0	0	0	0	0	0	0	0	8	8	8	8	20	36	94	57	16	2	1	0	1	1	1	0	3	8	14	2	0	0	0	0	0
Barbados	Crustaceans and molluscs, nei, frozen	Exports	Crustaceans and molluscs	Frozen	NA	Crustacean	Crustacean	1	272	54	181	9	3	0	3	0	9	10	0	0	0	3	0	0	0	0	0	0	0	0	0	0	0	0	0	0	0	0	0	0	0	0	0	0	0	0	0	0	0
Barbados	Crustaceans and molluscs, nei, frozen	Imports	Crustaceans and molluscs	Frozen	NA	Crustacean	Crustacean	1	972	8	15	44	51	32	31	107	25	50	242	98	100	155	5	9	0	0	0	0	0	0	0	0	0	0	0	0	0	0	0	0	0	0	0	0	0	0	0	0	0
Barbados	Crustaceans and molluscs, prepared or preserved, nei	Imports	Crustaceans and molluscs	Prepared or preserved	NA	Crustacean	Crustacean	2.27	331.42	15.89	6.81	24.97	90.8	20.43	29.51	9.08	13.62	13.62	13.62	18.16	0	24.97	24.97	20.43	4.54	0	0	0	0	0	0	0	0	0	0	0	0	0	0	0	0	0	0	0	0	0	0	0	0
Barbados	Rock lobster and other sea crawfish (Palinurus, Panulirus, Jasus), even smoked, frozen, nei	Imports	Lobster	Smoked	NA	Crustacean	Crustacean	2	521.6	0	0	0	0	0	0	0	0	0	0	0	0	0	0	0	72	44	54	40	38	48	24	16	8	24	8	8	8	12	4	8	12	2	0	6	6	6	0	0	12
Barbados	Shrimps and prawns, frozen, nei	Imports	Shrimps and prawns	Frozen	NA	Crustacean	Crustacean	1	4061.57	0	0	0	0	0	0	0	0	0	0	0	0	0	70	81	94	227	96	86	97	111	123	77	136	140	149	124	136	58	170	139	161	131	120	131	138	111	138	127	191
Barbados	Shrimps, prawns, prepared or preserved, nei	Imports	Shrimps and prawns	Prepared or preserved	NA	Crustacean	Crustacean	2.27	1353.31	0	0	0	0	0	0	0	0	0	0	0	0	0	0	0	0	0	0	0	0	0	0	0	0	11.35	36.32	65.83	29.51	27.24	68.1	70.37	54.48	133.93	111.23	95.34	95.34	99.88	88.53	81.72	56.75
Barbados	Dogfish and other sharks nei (excl. Squalus acanthias, Scyliorhinus spp., Lamna nasus, Prionace glauca), frozen	Imports	Dogfish and other sharks	Frozen	NA	Dogfish and other sharks	Fish	1	547.97	0	0	0	0	0	0	0	0	0	0	0	0	0	0	0	0	0	0	0	0	0	0	0	0	4	14	25	18	21	47	25	37	42	33	24	27	59	41	33	21
Barbados	Fish dried, whether or not salted, nei	Imports	Fish	Dried	NA	Fish	Fish	2.82	25823.2	124.08	129.72	118.44	1613.04	829.08	42.3	454.02	1827.36	2044.5	578.1	569.64	620.4	654.24	16.92	0	0	0	0	0	8.46	25.38	0	0	0	141	163.56	141	600.66	611.94	905.22	916.5	1009.56	1037.76	705	1065.96	1288.74	1108.26	905.22	1102.62	908.04
Barbados	Fish fillets, dried, salted or in brine, nei	Imports	Fish	Dried	Fillets	Fish	Fish	2.82	3970.08	0	0	0	0	0	0	0	0	0	0	0	0	0	0	0	0	0	0	0	0	0	0	0	0	0	2.82	2.82	0	0	0	5.64	0	0	0	0	2.82	0	5.64	205.86	668.34
Barbados	Fish fillets, fresh or chilled, nei	Imports	Fish	Live, fresh or chilled	Fillets	Fish	Fish	1.25	1695.11	0	0	0	0	0	0	0	0	0	3.75	0	0	0	10	0	25	6.25	11.25	45	85	78.75	26.25	17.5	43.75	143.75	78.75	65	23.75	15	96.25	101.25	62.5	27.5	51.25	38.75	101.25	65	83.75	50	47.5
Barbados	Fish fillets, frozen, nei	Imports	Fish	Frozen	Fillets	Fish	Fish	1.25	8204.73	0	0	0	0	7.5	15	2.5	0	0	3.75	2.5	0	0	6.25	35	51.25	53.75	56.25	138.75	42.5	122.5	200	135	390	241.25	153.75	258.75	333.75	196.25	463.75	332.5	485	521.25	303.75	347.5	377.5	576.25	455	328.75	461.25
Barbados	Fish meat, whether or not minced, frozen, nei	Imports	Fish	Frozen	Meat	Fish	Fish	1.25	2373.5	0	0	0	0	0	0	0	0	0	0	0	0	0	0	0	0	0	0	0	0	0	0	0	0	286.25	226.25	222.5	81.25	6.25	140	333.75	53.75	47.5	16.25	92.5	42.5	116.25	102.5	105	126.25
Barbados	Fish minced nei, prepared or preserved	Imports	Fish	Prepared or preserved	Minced	Fish	Fish	2.66	1007.4	0	0	0	0	0	0	0	0	0	0	0	0	0	0	0	0	0	0	0	0	0	0	0	0	23.94	45.22	50.54	42.56	39.9	45.22	53.2	37.24	34.58	37.24	34.58	42.56	58.52	66.5	71.82	58.52
Barbados	Fish nei, dried and salted	Imports	Fish	Dried	NA	Fish	Fish	2.82	2687.46	0	0	0	0	0	0	0	0	0	0	0	0	0	2.82	5.64	107.16	62.04	335.58	532.98	391.98	459.66	544.26	217.14	28.2	0	0	0	0	0	0	0	0	0	0	0	0	0	0	0	0
Barbados	Fish nei, prepared or preserved, not minced	Imports	Fish	Prepared or preserved	NA	Fish	Fish	2.66	24766.1	63.84	133	159.6	2652.02	2157.26	258.02	2455.18	2008.3	2143.96	2577.54	2545.62	2394	2319.52	920.36	1048.04	223.44	119.7	18.62	13.3	23.94	18.62	47.88	18.62	50.54	10.64	2.66	13.3	2.66	2.66	13.3	7.98	5.32	10.64	15.96	18.62	23.94	21.28	23.94	34.58	53.2
Barbados	Fish nei, salted or in brine	Imports	Fish	Salted	NA	Fish	Fish	2.82	313.048	0	0	0	0	0	0	0	0	0	0	0	0	0	0	0	0	0	0	0	0	0	0	0	0	11.28	0	0	0	0	2.82	2.82	5.64	5.64	11.28	0	2.82	0	0	0	5.64
Barbados	Fish nei, smoked	Imports	Fish	Smoked	NA	Fish	Fish	2.5	1996.58	0	0	0	0	187.5	152.5	122.5	0	0	85	75	75	72.5	7.5	62.5	105	200	82.5	80	62.5	77.5	77.5	52.5	75	45	10	17.5	10	2.5	5	12.5	22.5	45	55	32.5	17.5	7.5	2.5	5	7.5
Barbados	Fish, fresh or chilled, nei	Imports	Fish	Live, fresh or chilled	NA	Fish	Fish	1	255.77	0	0	0	0	0	0	0	0	0	0	0	0	0	0	0	0	0	0	0	0	0	0	0	0	58	27	7	5	13	6	4	5	6	2	8	5	4	7	16	6
Barbados	Fish, frozen, nei	Imports	Fish	Frozen	NA	Fish	Fish	1	10669.5	0	0	0	0	0	0	0	0	0	0	0	0	0	0	0	0	0	0	0	0	0	0	0	0	0	597	814	978	1053	2722	355	366	407	353	310	572	452	441	429	609
Barbados	Flying fish, fillets, fresh or chilled	Imports	Flying fish	Live, fresh or chilled	Fillets	Flying fish	Fish	1.25	310	0	0	0	0	0	0	0	0	0	0	0	0	0	0	0	0	0	0	0	0	0	0	0	0	0	56.25	53.75	53.75	21.25	1.25	21.25	2.5	12.5	5	45	25	1.25	8.75	0	2.5
Barbados	Flyingfishes, frozen	Imports	Flying fish	Frozen	NA	Flying fish	Fish	1	176	0	0	0	0	0	0	0	0	0	0	0	0	0	0	0	0	0	0	0	0	0	0	0	0	0	2	8	19	11	1	0	0	17	22	22	11	10	19	21	13
Barbados	Herrings nei, smoked	Imports	Herring	Smoked	NA	Herring	Fish	2.5	1385.33	0	0	0	0	0	0	0	0	0	0	0	0	0	65	87.5	17.5	0	0	0	0	0	0	0	0	42.5	57.5	60	47.5	40	77.5	95	60	70	57.5	85	80	65	42.5	100	57.5
Barbados	Herrings prepared or preserved, not minced, nei	Imports	Herring	Prepared or preserved	NA	Herring	Fish	2.66	694.393	50.54	29.26	61.18	0	0	63.84	0	0	0	0	0	0	0	31.92	39.9	82.46	23.94	47.88	7.98	13.3	31.92	23.94	10.64	5.32	2.66	2.66	7.98	5.32	5.32	5.32	7.98	63.84	5.32	2.66	5.32	5.32	5.32	2.66	2.66	7.98
Barbados	Herrings, dried, whether or not salted	Imports	Herring	Dried	NA	Herring	Fish	2.82	507.6	118.44	98.7	234.06	0	0	22.56	0	0	0	0	0	0	0	14.1	14.1	5.64	0	0	0	0	0	0	0	0	0	0	0	0	0	0	0	0	0	0	0	0	0	0	0	0
Barbados	Mackerel prepared or preserved, not minced, nei	Imports	Mackerel	Prepared or preserved	NA	Mackerel	Fish	2.66	35369.8	625.1	933.66	1282.12	0	0	2138.64	0	0	0	0	0	0	0	997.5	888.44	1018.78	864.5	1183.7	1122.52	1372.56	1135.82	1319.36	747.46	1058.68	1002.82	1202.32	952.28	1220.94	960.26	1436.4	1074.64	1087.94	803.32	1111.88	571.9	853.86	970.9	699.58	739.48	763.42
Barbados	Mackerels nei, frozen	Imports	Mackerel	Frozen	NA	Mackerel	Fish	1	104.87	0	0	0	0	0	0	0	0	0	0	0	0	0	0	0	0	0	0	0	0	0	0	0	1	2	8	0	0	0	0	0	0	3	0	0	6	36	24	3	4
Barbados	Marine fish fillets, frozen, nei	Exports	Marine fish	Frozen	Fillets	Marine fish	Fish	1.25	555	0	0	0	0	0	0	0	0	0	1.25	2.5	0	15	7.5	1.25	8.75	25	40	53.75	83.75	68.75	51.25	72.5	66.25	3.75	0	1.25	0	0	43.75	0	0	0	0	0	0	0	2.5	0	0
Barbados	Marine fish nei, prepared or preserved, not minced	Reexports	Marine fish	Prepared or preserved	NA	Marine fish	Fish	2.66	409.64	0	2.66	0	332.5	53.2	21.28	0	0	0	0	0	0	0	0	0	0	0	0	0	0	0	0	0	0	0	0	0	0	0	0	0	0	0	0	0	0	0	0	0	0
Barbados	Marine fish, fresh or chilled, nei	Exports	Marine fish	Live, fresh or chilled	NA	Marine fish	Fish	1	149	0	0	0	0	2	0	1	0	0	3	20	0	24	10	2	0	1	0	1	19	0	14	23	25	1	1	0	1	0	0	0	0	0	0	0	0	0	1	0	0
Barbados	Marine fish, fresh or chilled, nei	Imports	Marine fish	Live, fresh or chilled	NA	Marine fish	Fish	1	623.51	0	0	0	0	28	0	13	0	0	4	4	0	13	108	21	22	14	11	12	2	10	37	16	76	0	21	44	47	45	27	0	0	25	3	0	2	0	18	0	0
Barbados	Marine fish, frozen, nei	Exports	Marine fish	Frozen	NA	Marine fish	Fish	1	249	34	9	1	1	0	1	0	18	8	9	4	25	23	14	1	1	8	5	9	17	3	3	3	0	0	0	3	0	11	0	0	2	29	2	0	0	0	5	0	0
Barbados	Marine fish, frozen, nei	Imports	Marine fish	Frozen	NA	Marine fish	Fish	1	19726	373	237	273	118	195	404	234	0	174	224	259	300	133	338	290	282	229	224	239	225	422	367	324	450	582	254	295	330	94	269	623	491	373	415	405	415	448	363	382	348
Barbados	Miscellaneous marine fish fillets, fresh or chilled, nei	Exports	Marine fish	Live, fresh or chilled	Fillets	Marine fish	Fish	1.25	416.25	0	0	0	0	0	0	0	0	0	0	1.25	0	0	0	1.25	5	2.5	2.5	2.5	1.25	0	0	2.5	1.25	3.75	0	0	2.5	0	100	0	0	0	0	0	0	0	0	0	0
Barbados	Miscellaneous marine fish meat, minced or not, frozen, nei	Exports	Marine fish	Frozen	Meat	Marine fish	Fish	1.25	136.25	0	0	0	0	0	0	0	0	0	0	0	0	0	0	0	0	0	0	0	0	0	0	0	0	36.25	27.5	1.25	0	0	0	1.25	56.25	10	2.5	1.25	0	0	0	0	0
Barbados	Miscellaneous marine fish, salted or in brine, nei	Imports	Marine fish	Salted	NA	Marine fish	Fish	2.82	1301.99	0	0	0	0	0	0	0	0	0	0	0	0	0	0	0	16.92	14.1	33.84	95.88	104.34	124.08	93.06	8.46	0	0	0	0	8.46	0	33.84	73.32	109.98	76.14	33.84	67.68	31.02	39.48	59.22	33.84	81.78
Barbados	Miscellaneous pelagic fish fillets, frozen, nei	Imports	Pelagic fish	Frozen	Fillets	Pelagic fish	Fish	1.25	1491.69	0	0	0	0	0	0	0	0	0	0	0	0	0	0	0	0	0	0	0	0	0	0	0	0	0	95	148.75	177.5	337.5	60	67.5	110	73.75	77.5	50	76.25	12.5	33.75	71.25	68.75
Barbados	Miscellaneous pelagic fish, nei, frozen	Imports	Pelagic fish	Frozen	NA	Pelagic fish	Fish	1	11221.5	0	0	0	0	0	0	0	0	0	0	0	0	0	0	0	0	0	0	0	0	0	0	0	0	0	0	0	0	0	0	889	916	882	986	942	1016	1127	709	1162	1154
Barbados	Pilchards (Sardinops spp.), prep. or pres., not minced, nei	Imports	Pilchards (Sardinops spp.)	Prepared or preserved	NA	Pilchards (Sardinops spp.)	Fish	2.66	38270.8	489.44	856.52	1391.18	0	0	992.18	0	0	0	0	0	0	0	1212.96	1008.14	1167.74	553.28	1066.66	1002.82	1415.12	760.76	1239.56	449.54	976.22	1369.9	896.42	1202.32	1109.22	1021.44	1473.64	1048.04	1114.54	1069.32	1784.86	1247.54	1239.56	1189.02	1194.34	1194.34	1157.1
Barbados	Salmon nei, not minced, prepared or preserved	Imports	Salmon	Prepared or preserved	NA	Salmon	Fish	2.66	5913.18	15.96	15.96	74.48	0	0	114.38	0	0	0	0	0	0	0	79.8	15.96	55.86	10.64	7.98	29.26	50.54	50.54	135.66	93.1	127.68	167.58	244.72	258.02	305.9	255.36	436.24	321.86	258.02	287.28	178.22	255.36	250.04	300.58	178.22	284.62	239.4
Barbados	Salmons nei, frozen	Imports	Salmon	Frozen	NA	Salmon	Fish	1	102.96	0	0	0	0	0	0	0	0	0	0	0	0	0	0	0	4	0	0	0	3	0	1	0	3	1	3	1	1	4	5	4	5	5	9	13	1	2	1	0	2
Barbados	Salmons, smoked	Imports	Salmon	Smoked	NA	Salmon	Fish	2.5	1616.72	0	0	0	0	0	0	0	0	0	0	0	0	0	20	17.5	7.5	17.5	17.5	27.5	32.5	50	75	75	65	37.5	52.5	47.5	50	20	50	45	60	60	42.5	60	55	65	72.5	90	80
Barbados	Salmonoids, fresh or chilled, nei	Imports	Salmonids	Live, fresh or chilled	NA	Salmonids	Fish	1	106.25	0	0	0	0	0	0	0	0	0	0	0	0	0	0	0	1	1	2	2	2	3	5	5	9	11	6	5	5	1	2	1	1	1	1	3	3	1	2	3	5
Barbados	Tuna loins and fillets, fresh or chilled	Exports	Tuna	Live, fresh or chilled	Loins	Tuna	Fish	1.25	296.837	0	0	0	0	0	0	0	0	0	0	0	0	0	0	0	0	0	0	0	0	0	0	0	0	0	0	0	0	0	0	0	0	0	10	21.25	33.75	51.25	35	35	43.75
Barbados	Tunas nei, frozen	Exports	Tuna	Frozen	NA	Tuna	Fish	1	266	0	0	0	0	0	0	0	0	0	0	0	0	0	0	0	0	0	5	23	33	24	2	19	6	0	0	0	0	0	0	44	62	47	0	1	0	0	0	0	0
[truncated: 30,683 more rows]
[truncated: 4 more columns]
