# Supplementary material for: Effect of trade on global aquatic food consumption patterns
Source: Nat Commun. 2024 Feb 15;15:1412. doi: 10.1038/s41467-024-45556-w (PMC10869811; doi:10.1038/s41467-024-45556-w)
Supplement: Supplementary file 5 — Supplementary Data 2 [file 41467_2024_45556_MOESM5_ESM.xlsx]

## Sheet: Sheet1
Country	Country.Abbreviation	Detailed.production.source	ASFIS.species	Common.name	FAO.major.fishing.area	Taxon	Latin.name.Species.group	Aqua.Cap.items	Trophic.level	Total.production	1976	1977	1978	1979	1980	1981	1982	1983	1984	1985	1986	1987	1988	1989	1990	1991	1992	1993	1994	1995	1996	1997	1998	1999	2000	2001	2002	2003	2004	2005	2006	2007	2008	2009	2010	2011	2012	2013	2014
Afghanistan	AFG	Capture	Freshwater fishes nei	Freshwater fish	Asia - Inland waters	Freshwater fish	Weighted mean	Freshwater fish	2.82125	48750	600	600	600	600	700	700	700	800	800	800	800	1000	1000	1000	1100	1100	1200	1200	1300	1300	1300	1250	1200	1200	1000	800	900	900	1000	1000	1000	1000	1000	1000	1000	1150	1300	1450	1600
Afghanistan	AFG	Aquaculture	Cyprinids nei	Carp	Asia - Inland waters	Freshwater fish	A13	Carp	2.73333	62500	150	150	150	150	150	150	150	150	150	150	150	150	150	150	300	300	300	300	300	300	300	300	300	300	300	400	400	400	400	400	400	900	900	1500	2100	2800	3430	4060	4710
Afghanistan	AFG	Aquaculture	Rainbow trout	Rainbow trout	Asia - Inland waters	Freshwater fish	Oncorhynchus mykiss (Walbaum, 1792)	Rainbow trout	4.1	1630	20	20	20	20	20	20	20	20	20	20	20	20	20	20	0	0	0	0	0	0	0	0	0	0	0	50	50	50	50	50	50	150	150	150	150	50	50	50	50
Albania	ALB	Capture	Angelsharks, sand devils nei	Angelshark	Mediterranean and Black Sea	Marine fish	Squatina squatina (Linnaeus, 1758)	Angelshark	4.1	547	0	0	0	0	0	0	0	0	0	0	0	0	0	0	0	0	0	0	0	0	53	20	31	30	30	16	79	1	4	68	55	12	23	14	78	12	5	5	4
Albania	ALB	Capture	Atlantic bluefin tuna	Atlantic bluefin tuna	Mediterranean and Black Sea	Marine fish	Thunnus thynnus (Linnaeus, 1758)	Atlantic bluefin tuna	4.5	493	0	0	0	0	0	0	0	0	0	0	0	0	0	0	0	0	0	0	0	0	0	0	0	0	0	0	0	0	0	0	0	0	0	50	0	0	0	9	34
Albania	ALB	Capture	Atlantic bonito	Atlantic bonito	Mediterranean and Black Sea	Marine fish	Sarda sarda (Bloch, 1793)	Atlantic bonito	4.5	383	0	0	0	0	0	0	0	0	0	0	0	0	0	0	0	0	0	0	0	1	2	0	12	30	25	30	24	4	2	23	30	19	27	21	23	12	5	4	3
Albania	ALB	Capture	Scomber mackerels nei	Atlantic mackerel	Mediterranean and Black Sea	Marine fish	Scomber scombrus Linnaeus, 1758	Atlantic mackerel	3.6	976	0	0	0	0	0	0	0	0	0	0	0	0	0	0	0	0	0	0	0	0	10	5	4	4	4	11	11	20	51	38	47	84	84	92	80	52	13	25	24
Albania	ALB	Capture	Bighead carp	Bighead carp	Europe - Inland waters	Freshwater fish	Hypophthalmichthys nobilis (Richardson, 1845)	Bighead carp	2.8	196	0	0	0	0	0	0	0	0	0	0	0	0	0	0	0	0	0	0	0	0	0	0	0	0	0	0	0	0	0	0	0	24	24	5	0	23	12	13	10
Albania	ALB	Capture	Bleak	Bleak	Europe - Inland waters	Freshwater fish	Alburnus alburnus (Linnaeus, 1758)	Bleak	2.7	6174	0	0	0	0	0	0	0	0	0	0	0	0	0	0	0	0	0	0	0	151	162	68	149	160	190	478	234	280	330	457	402	504	190	530	505	360	195	200	210
Albania	ALB	Capture	Bogue	Bogue	Mediterranean and Black Sea	Marine fish	Boops boops (Linnaeus, 1758)	Bogue	2.8	7872	0	0	0	0	0	0	0	559	392	406	499	564	724	583	754	283	196	150	100	52	104	65	220	220	220	120	150	84	76	68	86	132	132	154	80	88	55	50	78
Albania	ALB	Capture	Common carp	Common carp	Europe - Inland waters	Freshwater fish	Cyprinus carpio Linnaeus, 1758	Common carp	3.1	9351	0	0	0	0	0	0	0	0	0	0	0	64	104	146	89	27	14	20	30	34	45	38	230	216	230	300	260	350	415	540	430	435	371	214	335	450	398	418	434
Albania	ALB	Capture	Common dentex	Common dentex	Mediterranean and Black Sea	Marine fish	Dentex dentex (Linnaeus, 1758)	Common dentex	4.5	448	0	0	0	0	0	0	0	0	0	0	0	0	0	0	0	0	0	0	0	0	0	0	0	0	0	26	80	4	5	25	40	27	32	43	25	22	14	13	11
Albania	ALB	Capture	Pandoras nei	Common pandora	Mediterranean and Black Sea	Marine fish	Pagellus erythrinus (Linnaeus, 1758)	Common pandora	3.5	763	0	0	0	0	0	0	0	0	0	0	0	0	0	0	0	0	0	0	0	12	27	25	33	35	34	15	26	13	20	3	30	25	54	39	23	31	25	34	43
Albania	ALB	Capture	Common sole	Common sole	Mediterranean and Black Sea	Marine fish	Solea solea (Linnaeus, 1758)	Common sole	3.2	1451	0	0	0	0	0	0	0	0	0	0	0	0	0	0	0	0	0	0	0	25	27	21	35	31	41	14	195	38	73	40	48	63	63	69	120	68	79	62	44
Albania	ALB	Capture	Crucian carp	Crucian carp	Europe - Inland waters	Freshwater fish	Carassius carassius (Linnaeus, 1758)	Crucian carp	3.1	6236	0	0	0	0	0	0	0	0	0	0	0	148	143	149	97	32	11	10	9	0	0	0	77	62	65	326	260	300	350	381	394	431	380	208	225	230	90	99	110
Albania	ALB	Capture	Freshwater crustaceans nei	Crustacean	Europe - Inland waters	Crustacean	Crustacean	Crustacean	2.5	677	0	0	0	0	0	0	0	0	0	0	0	154	220	208	45	20	15	10	5	0	0	0	0	0	0	0	0	0	0	0	0	0	0	0	0	0	0	0	0
Albania	ALB	Capture	Common cuttlefish	Cuttlefish	Mediterranean and Black Sea	Cephalopod	Cephalopod	Cephalopod	3	1655	0	0	0	0	0	0	0	0	0	0	0	0	0	0	0	0	0	0	0	39	33	33	51	51	50	22	52	43	70	75	86	47	62	126	98	90	80	85	75
Albania	ALB	Capture	Dogfish sharks nei	Dogfish shark	Mediterranean and Black Sea	Marine fish	Carcharias taurus Rafinesque, 1810	Dogfish shark	4.5	485	0	0	0	0	0	0	0	0	0	0	0	0	0	0	0	0	0	0	0	1	64	13	0	0	0	10	77	1	7	56	73	30	36	48	31	38	0	0	0
Albania	ALB	Capture	European anchovy	European anchovy	Mediterranean and Black Sea	Marine fish	Engraulis encrasicolus (Linnaeus, 1758)	European anchovy	3.1	7671	0	0	0	0	0	0	0	0	0	0	0	0	0	0	0	0	0	0	0	0	2	0	0	0	0	4	3	1	1	1	1	10	7	5	3	7	1206	1591	1236
Albania	ALB	Capture	European conger	European conger	Mediterranean and Black Sea	Marine fish	Conger conger (Linnaeus, 1758)	European conger	4.3	257	0	0	0	0	0	0	0	0	0	0	0	0	0	0	0	0	0	0	0	0	1	2	0	0	0	0	10	7	5	3	3	61	47	41	0	22	6	6	10
Albania	ALB	Capture	European eel	European eel	Europe - Inland waters	Freshwater fish	Anguilla anguilla (Linnaeus, 1758)	European eel	3.6	2574	0	0	0	0	0	0	0	0	0	0	0	177	194	143	165	81	188	150	100	6	10	21	58	63	70	0	23	0	50	102	190	116	93	66	55	45	50	47	43
Albania	ALB	Capture	European eel	European eel	Mediterranean and Black Sea	Marine fish	Anguilla anguilla (Linnaeus, 1758)	European eel	3.6	200	0	0	0	0	0	0	0	0	0	0	0	0	0	0	0	0	0	0	0	33	40	0	0	0	0	98	2	0	2	3	3	3	5	4	4	3	0	0	0
Albania	ALB	Capture	European flounder	European flounder	Mediterranean and Black Sea	Marine fish	Platichthys flesus (Linnaeus, 1758)	European flounder	3.3	432	0	0	0	0	0	0	0	0	0	0	0	0	0	0	0	0	0	0	0	0	3	9	42	41	45	15	3	0	37	20	27	15	17	17	34	8	16	15	12
Albania	ALB	Capture	European hake	European hake	Mediterranean and Black Sea	Marine fish	Merluccius merluccius (Linnaeus, 1758)	European hake	4.4	14748	0	0	0	0	0	0	0	71	65	83	98	96	67	105	562	238	454	400	300	227	293	185	340	341	330	380	200	384	473	267	280	275	275	336	280	286	899	851	902
Albania	ALB	Capture	European perch	European perch	Europe - Inland waters	Freshwater fish	Perca fluviatilis Linnaeus, 1758	European perch	4.4	884	0	0	0	0	0	0	0	0	0	0	0	0	0	0	0	0	0	0	0	0	0	0	0	0	0	0	0	0	0	0	0	64	111	58	136	20	25	20	21
Albania	ALB	Capture	European pilchard(=Sardine)	European pilchard	Mediterranean and Black Sea	Marine fish	Sardina pilchardus (Walbaum, 1792)	European pilchard	3.1	39698	0	0	0	0	0	0	0	2503	2071	5050	3664	4673	4487	2535	3818	492	34	50	100	235	196	28	28	40	45	123	90	70	32	104	115	95	110	120	104	125	1690	1474	1106
Albania	ALB	Capture	European seabass	European seabass	Mediterranean and Black Sea	Marine fish	Dicentrarchus labrax (Linnaeus, 1758)	European seabass	3.5	1349	0	0	0	0	0	0	0	0	0	0	0	0	0	0	0	0	0	0	0	14	32	14	30	30	50	70	64	2	13	43	58	116	116	73	170	95	42	39	44
Albania	ALB	Capture	European sprat	European sprat	Mediterranean and Black Sea	Marine fish	Sprattus sprattus (Linnaeus, 1758)	European sprat	3	198	0	0	0	0	0	0	0	0	0	0	0	0	0	0	0	0	0	0	0	0	0	0	0	0	0	0	0	0	2	1	2	3	8	5	0	2	22	28	27
Albania	ALB	Capture	Mullets nei	Flathead grey mullet	Europe - Inland waters	Freshwater fish	Mugil cephalus Linnaeus, 1758	Flathead grey mullet	2.5	4254	0	0	0	0	0	0	0	0	0	0	0	0	0	0	0	0	0	0	0	0	0	0	100	74	105	50	50	65	320	430	560	250	210	150	104	85	178	210	193
Albania	ALB	Capture	Freshwater fishes nei	Freshwater fish	Europe - Inland waters	Freshwater fish	Weighted mean	Freshwater fish	2.91235	36966	2879	2846	2817	2790	2761	2778	3092	2745	2432	2772	2784	734	863	927	635	317	481	500	440	0	0	0	0	0	0	0	24	30	0	3	3	210	321	508	157	73	2	3	0
Albania	ALB	Capture	Gilthead seabream	Gilthead seabream	Mediterranean and Black Sea	Marine fish	Sparus aurata Linnaeus, 1758	Gilthead seabream	3.7	1527	0	0	0	0	0	0	0	0	0	0	0	0	0	0	0	0	0	0	0	17	27	11	20	20	23	90	181	8	8	25	110	51	110	67	225	70	54	56	43
Albania	ALB	Capture	Grass carp(=White amur)	Grass carp	Europe - Inland waters	Freshwater fish	Ctenopharyngodon idella (Valenciennes, 1844)	Grass carp	2	590	0	0	0	0	0	0	0	0	0	0	0	2	7	6	6	2	1	1	1	0	1	0	3	5	45	10	14	20	23	43	38	88	45	64	67	60	2	2	3
Albania	ALB	Capture	Greater amberjack	Greater amberjack	Mediterranean and Black Sea	Marine fish	Seriola dumerili (Risso, 1810)	Greater amberjack	4.5	114	0	0	0	0	0	0	0	0	0	0	0	0	0	0	0	0	0	0	0	0	2	1	0	0	0	2	19	1	7	5	8	2	5	10	2	2	7	8	4
Albania	ALB	Capture	Greater weever	Greater weever	Mediterranean and Black Sea	Marine fish	Trachinus draco Linnaeus, 1758	Greater weever	4.2	217	0	0	0	0	0	0	0	0	0	0	0	0	0	0	0	0	0	0	0	0	0	0	0	0	0	0	0	0	48	51	118	0	0	0	0	0	0	0	0
Albania	ALB	Capture	Groupers nei	Grouper	Mediterranean and Black Sea	Marine fish	C88	Grouper	4.05	146	0	0	0	0	0	0	0	0	0	0	0	0	0	0	0	0	0	0	0	0	2	1	0	0	0	0	3	2	5	1	7	16	23	21	0	18	7	6	4
Albania	ALB	Capture	Gurnards, searobins nei	Gurnard	Mediterranean and Black Sea	Marine fish	C106	Gurnard	3.85	464	0	0	0	0	0	0	0	0	0	0	0	0	0	0	0	0	0	0	0	2	15	0	0	0	0	34	72	25	7	20	26	41	39	36	16	40	7	4	6
Albania	ALB	Capture	Orfe(=Ide)	Ide	Europe - Inland waters	Freshwater fish	Leuciscus idus (Linnaeus, 1758)	Ide	3.8	139	0	0	0	0	0	0	0	0	0	0	0	24	23	34	31	4	10	8	5	0	0	0	0	0	0	0	0	0	0	0	0	0	0	0	0	0	0	0	0
Albania	ALB	Capture	Jack and horse mackerels nei	Jack and horse mackerel	Mediterranean and Black Sea	Marine fish	C121	Jack and horse mackerel	3.6	2399	0	0	0	0	0	0	0	0	0	0	0	0	0	0	0	0	0	0	0	50	68	18	85	92	90	21	65	66	94	75	118	130	139	182	90	170	80	93	95
Albania	ALB	Capture	John dory	John dory	Mediterranean and Black Sea	Marine fish	Zeus faber Linnaeus, 1758	John dory	4.5	181	0	0	0	0	0	0	0	0	0	0	0	0	0	0	0	0	0	0	0	2	0	0	0	0	0	0	5	3	2	2	4	12	12	22	0	18	12	11	9
Albania	ALB	Capture	Leerfish	Leerfish	Mediterranean and Black Sea	Marine fish	Lichia amia (Linnaeus, 1758)	Leerfish	4.5	222	0	0	0	0	0	0	0	0	0	0	0	0	0	0	0	0	0	0	0	0	0	0	0	0	0	0	1	1	1	4	2	37	42	13	32	13	6	7	12
Albania	ALB	Capture	Norway lobster	Lobster	Mediterranean and Black Sea	Crustacean	Crustacean	Crustacean	2.5	2937	0	0	0	0	0	0	0	0	0	0	0	0	0	0	0	0	0	0	0	0	3	0	0	0	0	10	5	2	2	2	4	0	1	0	0	0	435	398	400
Albania	ALB	Capture	Marine fishes nei	Marine fish	Mediterranean and Black Sea	Marine fish	Weighted mean	Marine fish	3.39224	63817	5498	5490	5990	5950	5900	6143	5720	1261	923	857	1536	982	1029	2485	714	571	48	250	450	105	327	108	370	375	789	312	323	4	720	944	900	772	852	980	880	1019	316	430	520
Albania	ALB	Capture	Megrim	Megrim	Mediterranean and Black Sea	Marine fish	Lepidorhombus whiffiagonis (Walbaum, 1792)	Megrim	4.3	278	0	0	0	0	0	0	0	0	0	0	0	0	0	0	0	0	0	0	0	1	1	0	0	0	0	1	6	0	2	7	5	11	29	28	15	8	20	18	21
Albania	ALB	Capture	Monkfishes nei	Monkfish	Mediterranean and Black Sea	Marine fish	Lophius piscatorius Linnaeus, 1758	Monkfish	4.5	524	0	0	0	0	0	0	0	0	0	0	0	0	0	0	0	0	0	0	0	0	46	0	42	48	44	0	14	25	22	12	18	21	18	39	0	16	17	15	16
Albania	ALB	Capture	Mullets nei	Mullet	Mediterranean and Black Sea	Marine fish	C160	Mullet	2.8	4288	0	0	0	0	0	0	0	0	0	0	0	361	371	310	778	200	196	150	100	52	105	42	36	66	45	130	78	3	55	140	76	75	110	128	140	75	55	61	78
Albania	ALB	Capture	Common octopus	Octopus	Mediterranean and Black Sea	Cephalopod	Cephalopod	Cephalopod	3	2715	0	0	0	0	0	0	0	0	0	0	0	0	0	0	0	0	0	0	0	66	75	59	93	90	85	24	105	137	135	47	82	82	82	109	47	113	165	170	173
Albania	ALB	Capture	Picarels nei	Picarel	Mediterranean and Black Sea	Marine fish	Spicara smaris (Linnaeus, 1758)	Picarel	3	6523	0	0	0	0	0	0	0	1041	620	781	783	590	459	406	1150	133	127	100	50	0	11	0	7	7	10	5	11	59	47	53	4	2	10	0	53	4	0	0	0
Albania	ALB	Capture	Pike-perch	Pike-perch	Europe - Inland waters	Freshwater fish	Sander lucioperca (Linnaeus, 1758)	Pike-perch	4	1017	0	0	0	0	0	0	0	0	0	0	0	0	0	5	171	57	34	25	20	5	10	4	0	0	0	45	30	45	60	55	68	74	55	62	80	55	6	5	7
Albania	ALB	Capture	Porgies, seabreams nei	Porgy, seabream	Mediterranean and Black Sea	Marine fish	C188	Porgy and seabream	3.55	986	0	0	0	0	0	0	0	68	63	48	78	69	111	107	146	59	82	70	50	3	9	1	0	0	0	1	2	2	4	3	7	0	0	0	3	0	0	0	0
Albania	ALB	Capture	Caramote prawn	Prawn	Mediterranean and Black Sea	Crustacean	Crustacean	Crustacean	2.5	1464	0	0	0	0	0	0	0	0	0	0	0	0	0	0	0	0	0	0	0	30	8	4	18	18	20	23	84	178	285	150	102	18	23	20	228	9	19	24	33
Albania	ALB	Capture	Rainbow trout	Rainbow trout	Europe - Inland waters	Freshwater fish	Oncorhynchus mykiss (Walbaum, 1792)	Rainbow trout	4.1	114	0	0	0	0	0	0	0	0	0	0	0	26	21	0	0	0	0	0	0	0	0	0	0	0	0	0	67	0	0	0	0	0	0	0	0	0	0	0	0
Albania	ALB	Capture	Rays, stingrays, mantas nei	Ray, stingray, manta	Mediterranean and Black Sea	Marine fish	C201	Ray and stingray and manta	4.03333	2558	0	0	0	0	0	0	0	270	179	141	236	491	429	58	20	10	10	10	15	67	23	24	86	78	85	14	28	16	28	44	51	27	50	32	6	30	0	0	0
Albania	ALB	Capture	Roaches nei	Roach	Europe - Inland waters	Freshwater fish	Rutilus rutilus (Linnaeus, 1758)	Roach	3	4162	0	0	0	0	0	0	0	0	0	0	0	43	29	48	21	16	8	6	4	0	0	0	0	0	0	0	0	0	95	16	132	105	90	115	114	110	300	320	370
Albania	ALB	Capture	Round sardinella	Round sardinella	Mediterranean and Black Sea	Marine fish	Sardinella aurita Valenciennes, 1847	Round sardinella	3.4	142	0	0	0	0	0	0	0	0	0	0	0	0	0	0	0	0	0	0	0	0	0	0	0	0	0	0	0	54	42	15	25	0	0	0	6	0	0	0	0
Albania	ALB	Capture	Salmonoids nei	Salmon, trout, char	Europe - Inland waters	Freshwater fish	C337	Salmon and trout and char	3.74167	1485	0	0	0	0	0	0	0	0	0	0	0	11	9	6	32	21	17	16	13	11	35	15	102	104	110	56	43	50	66	27	41	58	58	49	29	59	50	51	52
Albania	ALB	Capture	Silversides(=Sand smelts) nei	Sand smelt	Mediterranean and Black Sea	Marine fish	C233	Sand smelt	3.45	731	0	0	0	0	0	0	0	0	0	0	0	132	140	138	63	18	20	20	15	8	20	8	11	15	20	10	16	0	2	4	3	5	10	8	4	4	5	5	4
Albania	ALB	Capture	Shads nei	Shad	Europe - Inland waters	Freshwater fish	C231	Shad	3.5	696	0	0	0	0	0	0	0	0	0	0	0	93	132	20	18	6	3	3	2	1	2	1	0	0	0	2	23	25	30	14	32	42	42	23	23	30	12	15	14
Albania	ALB	Capture	Blue and red shrimp	Shrimp	Mediterranean and Black Sea	Crustacean	Crustacean	Crustacean	2.5	557	0	0	0	0	0	0	0	0	0	0	0	0	0	0	0	0	0	0	0	0	3	0	0	0	0	0	34	22	15	12	18	0	0	0	0	0	0	0	0
Albania	ALB	Capture	Deep-water rose shrimp	Shrimp	Mediterranean and Black Sea	Crustacean	Crustacean	Crustacean	2.5	11422	0	0	0	0	0	0	0	0	0	0	0	0	0	0	0	0	0	0	0	0	20	8	0	0	0	52	57	1	8	78	65	198	187	262	7	209	1170	1210	1430
Albania	ALB	Capture	Giant red shrimp	Shrimp	Mediterranean and Black Sea	Crustacean	Crustacean	Crustacean	2.5	618	0	0	0	0	0	0	0	0	0	0	0	0	0	0	0	0	0	0	0	0	0	0	0	0	0	0	0	0	0	0	0	0	0	0	0	0	0	0	0
Albania	ALB	Capture	Spottail mantis squillid	Shrimp	Mediterranean and Black Sea	Crustacean	Crustacean	Crustacean	2.5	340	0	0	0	0	0	0	0	0	0	0	0	0	0	0	0	0	0	0	0	0	0	0	0	0	0	0	0	0	0	0	0	0	0	0	0	0	0	0	0
Albania	ALB	Capture	Silver carp	Silver carp	Europe - Inland waters	Freshwater fish	Hypophthalmichthys molitrix (Valenciennes, 1844)	Silver carp	2	6352	0	0	0	0	0	0	0	0	0	0	0	546	678	585	373	217	133	100	70	11	52	33	104	130	140	101	129	100	68	140	148	169	125	183	165	180	170	160	190
Albania	ALB	Capture	Smooth-hounds nei	Smooth-hound	Mediterranean and Black Sea	Marine fish	C237	Smooth-hound	3.9	479	0	0	0	0	0	0	0	0	0	0	0	0	0	0	0	0	0	0	0	20	12	3	12	12	32	5	23	10	12	2	8	15	21	40	10	14	34	38	35
Albania	ALB	Capture	Common squids nei	Squid	Mediterranean and Black Sea	Cephalopod	Cephalopod	Cephalopod	3	2110	0	0	0	0	0	0	0	0	0	0	0	0	0	0	0	0	0	0	0	7	47	34	93	93	90	65	85	45	73	64	103	81	107	60	64	52	76	92	105
Albania	ALB	Capture	Surmullets(=Red mullets) nei	Surmullet	Mediterranean and Black Sea	Marine fish	Mullus surmuletus Linnaeus, 1758	Surmullet	3.5	7708	0	0	0	0	0	0	0	135	64	53	79	62	74	124	172	158	537	400	200	76	64	61	143	145	140	170	97	141	158	113	185	154	162	187	113	132	450	448	380
Albania	ALB	Capture	Swordfish	Swordfish	Mediterranean and Black Sea	Marine fish	Xiphias gladius Linnaeus, 1758	Swordfish	4.5	244	0	0	0	0	0	0	0	0	0	0	0	0	0	0	0	0	0	0	0	0	13	0	0	0	0	2	15	0	5	12	23	20	28	12	17	20	9	12	11
Albania	ALB	Capture	Wuchang bream	Wuchang bream	Europe - Inland waters	Freshwater fish	Megalobrama amblycephala Yih, 1955	Wuchang bream	3.3	105	0	0	0	0	0	0	0	0	0	0	0	12	13	32	13	2	1	1	1	0	0	0	0	0	0	0	3	0	0	2	4	3	3	12	0	1	1	1	0
Albania	ALB	Aquaculture	Common carp	Common carp	Europe - Inland waters	Freshwater fish	Cyprinus carpio Linnaeus, 1758	Common carp	3.1	679	0	0	0	0	0	0	4	10	10	20	48	42	62	126	76	23	13	13	14	34	45	4	4	2	2	3	4	6	8	6	10	10	74	6	0	0	0	0	0
Albania	ALB	Aquaculture	European seabass	European seabass	Mediterranean and Black Sea	Marine fish	Dicentrarchus labrax (Linnaeus, 1758)	European seabass	3.5	6973	0	0	0	0	0	0	0	0	0	0	0	0	0	0	0	0	0	0	0	0	0	0	0	0	0	0	0	0	0	0	87	84	142	135	135	170	400	600	700
Albania	ALB	Aquaculture	Gilthead seabream	Gilthead seabream	Mediterranean and Black Sea	Marine fish	Sparus aurata Linnaeus, 1758	Gilthead seabream	3.7	19177	0	0	0	0	0	0	0	0	0	0	0	0	0	0	0	0	0	0	0	0	0	0	0	0	0	100	200	250	400	250	370	402	343	370	467	375	1600	1600	1600
Albania	ALB	Aquaculture	Grass carp(=White amur)	Grass carp	Europe - Inland waters	Freshwater fish	Ctenopharyngodon idella (Valenciennes, 1844)	Grass carp	2	187	0	0	0	0	0	0	0	0	0	0	0	0	0	7	6	2	1	1	1	0	0	0	0	1	1	2	2	3	6	3	6	5	70	70	0	0	0	0	0
Albania	ALB	Aquaculture	Rainbow trout	Rainbow trout	Europe - Inland waters	Freshwater fish	Oncorhynchus mykiss (Walbaum, 1792)	Rainbow trout	4.1	11558	0	0	0	2	8	5	10	10	20	20	22	220	245	270	203	37	20	20	20	0	0	2	8	100	100	15	350	350	350	350	217	221	254	300	500	500	500	500	500
Albania	ALB	Aquaculture	Silver carp	Silver carp	Europe - Inland waters	Freshwater fish	Hypophthalmichthys molitrix (Valenciennes, 1844)	Silver carp	2	4404	121	154	183	208	231	249	265	292	250	250	300	272	302	346	221	129	78	76	63	6	28	1	4	2	2	2	4	4	5	4	7	7	160	178	0	0	0	0	0
Algeria	DZA	Capture	Atlantic bluefin tuna	Atlantic bluefin tuna	Mediterranean and Black Sea	Marine fish	Thunnus thynnus (Linnaeus, 1758)	Atlantic bluefin tuna	4.5	31485	49	40	20	150	190	220	250	252	254	260	566	420	677	820	782	800	1104	1097	1560	156	156	157	1947	2142	2330	2012	1710	1015	1208	950	1038	833	889	223	19	39	69	244	244
Algeria	DZA	Capture	Atlantic bonito	Atlantic bonito	Mediterranean and Black Sea	Marine fish	Sarda sarda (Bloch, 1793)	Atlantic bonito	4.5	26330	143	206	196	515	640	740	860	867	874	880	459	203	625	1528	1307	261	315	471	418	506	277	357	511	475	405	350	597	839	609	575	684	910	1042	976	1009	355	353	614	504
Algeria	DZA	Capture	Atlantic mackerel	Atlantic mackerel	Mediterranean and Black Sea	Marine fish	Scomber scombrus Linnaeus, 1758	Atlantic mackerel	3.6	36619.8	265	124	214	513	640	750	860	867	874	880	342	1575	387	367	350	299	382	379	539	1243	590	750	1055	1053	1144	1167	567	3403	1688	817	791	932	3108	761	435	738	330	213	501
Algeria	DZA	Capture	Axillary seabream	Axillary seabream	Mediterranean and Black Sea	Marine fish	Pagellus acarne (Risso, 1827)	Axillary seabream	3.8	694	0	0	0	0	0	0	0	0	0	0	0	0	0	0	0	0	0	0	0	332	0	0	362	0	0	0	0	0	0	0	0	0	0	0	0	0	0	0	0
Algeria	DZA	Capture	Bogue	Bogue	Mediterranean and Black Sea	Marine fish	Boops boops (Linnaeus, 1758)	Bogue	2.8	117339	0	0	0	0	0	0	0	0	0	0	0	0	0	0	0	0	0	0	0	2282	1425	1631	3234	3452	4132	4135	4697	6951	5819	6597	5677	4972	7661	6618	6545	7288	6467	4989	3975
Algeria	DZA	Capture	Frigate and bullet tunas	Bullet tuna	Mediterranean and Black Sea	Marine fish	Auxis rochei (Risso, 1810)	Bullet tuna	4.4	17714.8	0	0	0	0	0	0	0	0	0	0	0	0	0	0	0	174	270	348	306	230	237	179	299	173	225	230	481	588	391	547	586	477	1134	806	970	1119	1236	577	1025
Algeria	DZA	Capture	Cephalopods nei	Cephalopod	Mediterranean and Black Sea	Cephalopod	Cephalopod	Cephalopod	3	1446	0	0	0	0	0	0	0	0	0	0	0	0	0	0	0	0	0	0	0	0	0	0	70	29	6	22	113	45	0	0	0	824	29	19	38	54	22	111	64
Algeria	DZA	Capture	Common dentex	Common dentex	Mediterranean and Black Sea	Marine fish	Dentex dentex (Linnaeus, 1758)	Common dentex	4.5	101.54	0	0	0	0	0	0	0	0	0	0	0	0	0	0	0	0	0	0	0	0	0	0	0	0	0	0	0	0	0	0	0	0	2	18	15	11	11	8	12
Algeria	DZA	Capture	Common pandora	Common pandora	Mediterranean and Black Sea	Marine fish	Pagellus erythrinus (Linnaeus, 1758)	Common pandora	3.5	77505.1	3752	3567	3613	3676	4560	5320	6130	6177	6224	6270	0	0	0	0	0	0	0	0	0	1204	1633	2661	1503	1145	1518	1339	1515	2082	1361	1494	1206	973	951	588	547	848	1265	1033	930
Algeria	DZA	Capture	Common sole	Common sole	Mediterranean and Black Sea	Marine fish	Solea solea (Linnaeus, 1758)	Common sole	3.2	13447.6	240	225	260	248	310	360	410	413	416	420	372	798	774	374	350	280	320	350	400	313	387	333	285	234	278	271	377	585	271	255	213	201	241	245	116	164	175	161	164
Algeria	DZA	Capture	Marine crustaceans nei	Crustacean	Mediterranean and Black Sea	Crustacean	Crustacean	Crustacean	2.5	4759.41	4	7	14	47	60	70	80	81	82	90	0	0	0	348	250	150	150	150	250	73	67	71	154	83	308	222	297	49	0	0	0	4	10	44	108	83	222	79	58
Algeria	DZA	Capture	Common cuttlefish	Cuttlefish	Mediterranean and Black Sea	Cephalopod	Cephalopod	Cephalopod	3	12354.4	0	0	0	0	0	0	0	0	0	0	0	0	0	424	400	350	400	500	600	351	567	619	492	312	392	340	318	586	455	476	344	453	449	317	291	259	268	240	270
Algeria	DZA	Capture	Dogfish sharks nei	Dogfish shark	Mediterranean and Black Sea	Marine fish	Carcharias taurus Rafinesque, 1810	Dogfish shark	4.5	425.49	0	0	0	0	0	0	0	0	0	0	0	0	0	0	0	0	0	0	0	0	0	0	0	0	0	0	0	0	0	0	0	98	117	68	32	26	23	14	20
Algeria	DZA	Capture	European anchovy	European anchovy	Mediterranean and Black Sea	Marine fish	Engraulis encrasicolus (Linnaeus, 1758)	European anchovy	3.1	140213	3339	4382	2734	3290	4080	4760	5480	5522	5564	5610	4813	1736	947	2692	2500	2000	2500	2700	3500	1913	1330	1855	3511	3141	5721	6085	2182	1711	1374	3119	1542	1382	2216	3188	2015	2708	2265	990	2192
Algeria	DZA	Capture	Barracudas nei	European barracuda	Mediterranean and Black Sea	Marine fish	Sphyraena sphyraena (Linnaeus, 1758)	European barracuda	4	7090.64	0	0	0	0	0	0	0	0	0	0	0	0	0	518	400	300	200	100	100	0	0	0	0	6	47	392	447	721	618	546	398	302	301	251	300	248	96	126	127
Algeria	DZA	Capture	European conger	European conger	Mediterranean and Black Sea	Marine fish	Conger conger (Linnaeus, 1758)	European conger	4.3	262.74	0	0	0	0	0	0	0	0	0	0	0	0	0	0	0	0	0	0	0	0	0	0	0	0	0	0	0	0	0	0	0	5	16	36	18	18	18	13	17
Algeria	DZA	Capture	European eel	European eel	Mediterranean and Black Sea	Marine fish	Anguilla anguilla (Linnaeus, 1758)	European eel	3.6	549.44	0	0	0	0	0	0	0	0	0	0	0	0	0	0	0	0	0	0	0	0	0	0	10	0	0	0	0	0	0	0	0	0	0	0	0	15	64	60	71
Algeria	DZA	Capture	European hake	European hake	Mediterranean and Black Sea	Marine fish	Merluccius merluccius (Linnaeus, 1758)	European hake	4.4	44900.2	850	950	1192	1739	2160	2520	2900	2922	2944	2960	1139	2081	1806	828	850	650	900	1000	1200	1115	1154	1012	1310	1681	3	196	209	31	22	12	44	193	96	307	288	383	515	670	888
Algeria	DZA	Capture	European pilchard(=Sardine)	European pilchard	Mediterranean and Black Sea	Marine fish	Sardina pilchardus (Walbaum, 1792)	European pilchard	3.1	2.12931e+06	21069	27753	19707	21479	26650	31100	35820	36098	36375	36620	40323	68485	85307	65531	58000	52000	60000	63000	87000	58989	49906	49142	49295	56724	47677	58966	72547	70258	63796	69512	83928	73703	40047	55523	31219	33975	31873	36169	35762
Algeria	DZA	Capture	European seabass	European seabass	Mediterranean and Black Sea	Marine fish	Dicentrarchus labrax (Linnaeus, 1758)	European seabass	3.5	315.01	0	0	0	0	0	0	0	0	0	0	0	0	0	0	0	0	0	0	0	0	0	0	0	0	0	0	0	0	0	0	0	8	9	89	122	32	4	3	4
Algeria	DZA	Capture	Greater amberjack	Greater amberjack	Mediterranean and Black Sea	Marine fish	Seriola dumerili (Risso, 1810)	Greater amberjack	4.5	5086.93	0	0	0	0	0	0	0	0	0	0	0	0	0	0	0	0	0	0	0	87	32	19	48	75	99	341	542	686	719	441	255	231	0	67	220	243	110	149	136
Algeria	DZA	Capture	Greater forkbeard	Greater forkbeard	Mediterranean and Black Sea	Marine fish	Phycis blennoides (Brünnich, 1768)	Greater forkbeard	3.7	918.88	0	0	0	0	0	0	0	0	0	0	0	0	0	0	0	0	0	0	0	0	0	0	0	4	5	19	39	16	26	42	55	48	79	13	4	2	17	72	66
Algeria	DZA	Capture	Groupers nei	Grouper	Mediterranean and Black Sea	Marine fish	C88	Grouper	4.05	1220.44	0	0	0	0	0	0	0	0	0	0	0	0	0	0	0	0	0	0	0	0	0	0	0	0	0	0	0	0	0	0	0	200	267	198	173	85	53	51	41
Algeria	DZA	Capture	Jack and horse mackerels nei	Jack and horse mackerel	Mediterranean and Black Sea	Marine fish	C121	Jack and horse mackerel	3.6	333713	1868	1568	1368	1597	1980	2310	2660	2681	2702	2720	4221	4491	5208	3612	4000	3500	4500	5000	7000	6552	3644	5491	4827	6212	7702	8174	7088	7867	5975	10590	18695	27607	31990	18564	11145	11339	11992	12253	8260
Algeria	DZA	Capture	Leerfish	Leerfish	Mediterranean and Black Sea	Marine fish	Lichia amia (Linnaeus, 1758)	Leerfish	4.5	104.37	0	0	0	0	0	0	0	0	0	0	0	0	0	0	0	0	0	0	0	0	0	0	0	0	0	0	0	0	0	0	0	0	0	31	6	25	3	7	4
Algeria	DZA	Capture	Little tunny(=Atl.black skipj)	Little tunny	Mediterranean and Black Sea	Marine fish	Euthynnus alletteratus (Rafinesque, 1810)	Little tunny	4.5	8624.34	0	0	0	0	0	0	0	0	0	0	0	0	0	0	0	522	585	495	459	552	554	448	384	562	494	407	148	7	158	116	187	96	142	119	131	98	6	157	341
Algeria	DZA	Capture	Norway lobster	Lobster	Mediterranean and Black Sea	Crustacean	Crustacean	Crustacean	2.5	3994.27	101	53	33	64	80	90	110	111	112	120	200	196	238	113	110	100	120	130	150	129	100	89	138	96	92	45	56	119	69	60	25	14	53	84	99	151	74	31	32
Algeria	DZA	Capture	Palinurid spiny lobsters nei	Lobster	Mediterranean and Black Sea	Crustacean	Crustacean	Crustacean	2.5	1959.91	28	18	25	52	60	70	80	81	82	90	50	50	42	14	15	10	20	25	30	22	9	44	141	70	33	34	46	74	123	46	31	51	131	93	34	20	17	6	8
Algeria	DZA	Capture	Mackerels nei	Mackerel	Mediterranean and Black Sea	Marine fish	C144	Mackerel	3.75	2796	300	320	290	180	230	260	300	302	304	310	0	0	0	0	0	0	0	0	0	0	0	0	0	0	0	0	0	0	0	0	0	0	0	0	0	0	0	0	0
Algeria	DZA	Capture	Marine fishes nei	Marine fish	Mediterranean and Black Sea	Marine fish	Weighted mean	Marine fish	3.26569	256935	200	232	277	156	190	220	260	262	264	270	0	0	0	4083	2612	2836	1869	1912	2737	3890	3964	3799	2351	3403	9324	6010	6749	8271	0	0	0	6452	14419	13560	13871	13489	16635	16845	17438
Algeria	DZA	Capture	Monkfishes nei	Monkfish	Mediterranean and Black Sea	Marine fish	Lophius piscatorius Linnaeus, 1758	Monkfish	4.5	1304.19	0	0	0	0	0	0	0	0	0	0	0	0	0	0	0	0	0	0	0	0	0	0	0	0	0	0	0	0	0	0	0	25	119	161	119	79	78	59	107
Algeria	DZA	Capture	Mullets nei	Mullet	Mediterranean and Black Sea	Marine fish	C160	Mullet	2.8	4076.31	0	0	0	0	0	0	0	0	0	0	0	0	0	0	0	0	0	0	0	0	0	0	0	0	0	0	0	0	0	0	0	339	356	275	354	695	490	282	348
Algeria	DZA	Capture	Catsharks, nursehounds nei	Nursehound	Mediterranean and Black Sea	Marine fish	Scyliorhinus stellaris (Linnaeus, 1761)	Nursehound	4	3143.28	0	0	0	0	0	0	0	0	0	0	0	0	0	0	0	0	0	0	0	0	0	0	0	0	0	0	0	0	0	0	0	49	139	197	113	210	305	232	229
Algeria	DZA	Capture	Octopuses, etc. nei	Octopus	Mediterranean and Black Sea	Cephalopod	Cephalopod	Cephalopod	3	16402.5	0	0	0	0	0	0	0	0	0	0	0	0	0	0	0	0	0	0	0	382	190	185	543	305	306	343	366	639	684	1240	750	823	895	735	672	971	977	854	844
Algeria	DZA	Capture	Plain bonito	Plain bonito	Mediterranean and Black Sea	Marine fish	Orcynopsis unicolor (Geoffroy Saint-Hilaire, 1817)	Plain bonito	4.5	1822.23	0	0	0	0	0	0	0	0	0	0	0	0	0	0	0	87	135	198	153	92	119	224	128	216	135	145	128	0	0	0	0	0	0	27	7	9	7	3	3
Algeria	DZA	Capture	Porgies, seabreams nei	Porgy, seabream	Mediterranean and Black Sea	Marine fish	C188	Porgy and seabream	3.55	33480	0	0	0	0	0	0	0	0	0	0	0	0	0	7273	5200	4500	5000	5500	6000	0	0	0	0	7	0	0	0	0	0	0	0	0	0	0	0	0	0	0	0
Algeria	DZA	Capture	Common prawn	Prawn	Mediterranean and Black Sea	Crustacean	Crustacean	Crustacean	2.5	210	0	0	0	0	0	0	0	0	0	0	0	0	0	0	0	0	0	0	0	37	40	35	89	9	0	0	0	0	0	0	0	0	0	0	0	0	0	0	0
Algeria	DZA	Capture	Rays, stingrays, mantas nei	Ray, stingray, manta	Mediterranean and Black Sea	Marine fish	C201	Ray and stingray and manta	4.03333	9406.18	130	172	196	220	270	320	370	373	376	380	0	0	0	0	0	0	0	0	0	124	272	120	450	207	191	298	491	641	330	344	359	399	383	255	173	192	173	144	130
Algeria	DZA	Capture	Pargo breams nei	Red porgy	Mediterranean and Black Sea	Marine fish	Pagrus pagrus (Linnaeus, 1758)	Red porgy	3.9	6290.27	0	0	0	0	0	0	0	0	0	0	0	0	0	0	0	0	0	0	0	71	81	58	255	254	153	267	394	283	363	365	373	398	427	387	199	255	259	179	185
Algeria	DZA	Capture	Red porgy	Red porgy	Mediterranean and Black Sea	Marine fish	Pagrus pagrus (Linnaeus, 1758)	Red porgy	3.9	2189.53	0	0	0	0	0	0	0	0	0	0	0	0	0	0	0	0	0	0	0	0	0	0	0	0	0	0	0	0	0	0	0	518	529	409	237	200	73	34	36
Algeria	DZA	Capture	Scorpionfishes, redfishes nei	Red scorpionfish	Mediterranean and Black Sea	Marine fish	Scorpaena scrofa Linnaeus, 1758	Red scorpionfish	4.3	2022.53	0	0	0	0	0	0	0	0	0	0	0	0	0	0	0	0	0	0	0	0	0	0	0	0	0	0	0	0	0	0	0	192	361	272	109	88	97	71	155
Algeria	DZA	Capture	Saddled seabream	Saddled seabream	Mediterranean and Black Sea	Marine fish	Oblada melanura (Linnaeus, 1758)	Saddled seabream	3.4	304.43	0	0	0	0	0	0	0	0	0	0	0	0	0	0	0	0	0	0	0	0	0	0	0	0	0	0	0	0	0	0	0	3	13	46	20	32	21	18	26
Algeria	DZA	Capture	Salema	Salema	Mediterranean and Black Sea	Marine fish	Sarpa salpa (Linnaeus, 1758)	Salema	2	1387.83	0	0	0	0	0	0	0	0	0	0	0	0	0	0	0	0	0	0	0	0	0	0	0	0	0	0	0	0	0	0	0	22	46	239	125	143	132	115	110
Algeria	DZA	Capture	Sand steenbras	Sand steenbras	Mediterranean and Black Sea	Marine fish	Lithognathus mormyrus (Linnaeus, 1758)	Sand steenbras	3.4	196.53	0	0	0	0	0	0	0	0	0	0	0	0	0	0	0	0	0	0	0	0	0	0	0	0	0	0	0	0	0	0	0	12	6	19	12	11	9	10	11
Algeria	DZA	Capture	Sardinellas nei	Sardine	Mediterranean and Black Sea	Marine fish	C208	Sardine	3.3	524373	232	860	754	1294	1600	1870	2160	2177	2194	2210	4550	3490	4388	2809	5000	4000	9000	10000	13000	17887	8150	15741	9992	11393	20399	33748	24480	26397	22516	22942	23527	16853	22826	16176	11124	13431	17300	12920	11993
Algeria	DZA	Capture	Clupeoids nei	Sardine, Pilchard	Mediterranean and Black Sea	Marine fish	C32	Sardine and Pilchard	3.3	83488.9	0	0	0	0	0	0	0	0	0	0	0	0	0	3364	3200	2500	2700	2900	3500	2012	1182	1261	2279	2634	2608	1074	1541	2006	0	0	0	1449	1621	1060	6689	7830	7483	6834	6547
Algeria	DZA	Capture	Sharks, rays, skates, etc. nei	Shark, ray, skate	Mediterranean and Black Sea	Marine fish	C327	Shark and ray and skate	4.16154	14068.7	91	230	350	270	340	390	450	453	456	460	0	0	0	0	474	709	751	1127	1200	1000	965	415	867	854	331	679	519	25	12	30	11	11	34	59	41	53	39	41	44
Algeria	DZA	Capture	Blue and red shrimp	Shrimp	Mediterranean and Black Sea	Crustacean	Crustacean	Crustacean	2.5	60395.8	1192	1370	1499	1206	1500	1750	2010	2025	2041	2060	3523	4091	933	1530	1450	1300	1400	1500	1600	1305	1230	1186	1485	880	1116	740	893	1027	1310	1542	1423	1137	1244	1175	895	1010	881	725	891
Algeria	DZA	Capture	Deep-water rose shrimp	Shrimp	Mediterranean and Black Sea	Crustacean	Crustacean	Crustacean	2.5	45047.5	118	130	221	371	460	540	620	625	630	640	2279	2849	745	768	730	600	700	800	1000	539	918	1433	1639	2147	2696	2107	1654	1384	1134	1152	850	639	760	1204	719	925	1115	893	986
Algeria	DZA	Capture	Skipjack tuna	Skipjack tuna	Mediterranean and Black Sea	Marine fish	Katsuwonus pelamis (Linnaeus, 1758)	Skipjack tuna	4.4	380	0	0	0	0	0	0	0	0	0	0	0	0	0	0	0	0	0	0	0	0	0	0	171	43	89	77	0	0	0	0	0	0	0	0	0	0	0	0	0
Algeria	DZA	Capture	Common squids nei	Squid	Mediterranean and Black Sea	Cephalopod	Cephalopod	Cephalopod	3	6867.77	0	0	0	0	0	0	0	0	0	0	0	0	0	331	250	200	250	250	300	101	53	138	202	240	212	224	172	210	201	183	270	219	236	227	121	198	177	157	271
Algeria	DZA	Capture	Surmullets(=Red mullets) nei	Surmullet	Mediterranean and Black Sea	Marine fish	Mullus surmuletus Linnaeus, 1758	Surmullet	3.5	60933.1	783	898	860	1090	1350	1580	1820	1834	1848	1860	1577	1807	1736	1267	1250	1000	1300	1400	1800	1576	1950	1320	1480	1420	2170	2081	2140	1775	1665	1625	1795	1862	1624	933	817	999	926	757	698
Algeria	DZA	Capture	Swordfish	Swordfish	Mediterranean and Black Sea	Marine fish	Xiphias gladius Linnaeus, 1758	Swordfish	4.5	32231	368	370	320	521	650	760	870	877	884	890	847	1820	2621	590	712	562	395	562	600	807	807	807	825	709	816	1081	814	665	564	635	702	602	802	468	459	216	465	487	702
Algeria	DZA	Capture	White seabream	White seabream	Mediterranean and Black Sea	Marine fish	Diplodus sargus (Linnaeus, 1758)	White seabream	3.4	987.37	0	0	0	0	0	0	0	0	0	0	0	0	0	0	0	0	0	0	0	0	0	0	0	0	0	0	0	0	0	0	0	22	35	94	30	61	49	59	71
Algeria	DZA	Capture	Whiting	Whiting	Mediterranean and Black Sea	Marine fish	Merlangius merlangus (Linnaeus, 1758)	Whiting	4.4	5137.07	0	0	0	0	0	0	0	0	0	0	0	0	0	0	0	0	0	0	0	0	0	0	0	0	0	0	0	0	0	0	0	758	966	510	539	342	343	195	252
Algeria	DZA	Aquaculture	Barbel	Barbel	Africa - Inland waters	Freshwater fish	Barbus barbus (Linnaeus, 1758)	Barbel	3.1	1828.75	0	0	0	0	0	0	0	0	0	0	0	0	0	0	0	0	0	0	0	0	0	0	0	0	0	0	0	0	0	0	0	0	0	186.38	269.62	197.99	167.52	185.27	179.05
Algeria	DZA	Aquaculture	Bighead carp	Bighead carp	Africa - Inland waters	Freshwater fish	Hypophthalmichthys nobilis (Richardson, 1845)	Bighead carp	2.8	121.81	0	0	0	0	0	0	0	0	0	0	0	0	0	0	0	0	0	0	0	0	0	0	0	0	0	0	0	0	0	0	0	0	0	0	0	0	0	0	0
Algeria	DZA	Aquaculture	Common carp	Common carp	Africa - Inland waters	Freshwater fish	Cyprinus carpio Linnaeus, 1758	Common carp	3.1	1026.52	0	0	0	0	0	0	0	0	0	0	0	0	0	0	0	0	0	0	0	0	0	0	0	0	0	0	0	0	0	0	0	0	0	0	0	0	0	0	0
Algeria	DZA	Aquaculture	Crucian carp	Crucian carp	Africa - Inland waters	Freshwater fish	Carassius carassius (Linnaeus, 1758)	Crucian carp	3.1	201.44	0	0	0	0	0	0	0	0	0	0	0	0	0	0	0	0	0	0	0	0	0	0	0	0	0	0	0	0	0	0	0	0	0	0	0	0	0	0	0
Algeria	DZA	Aquaculture	Cyprinids nei	Carp	Africa - Inland waters	Freshwater fish	A13	Carp	2.73333	11244.1	0	0	0	0	0	0	0	0	15	54	79	20	19	30	17	0	0	0	2	3	3	3	1	1	1	2	2	7	6	6	0	0	1643.71	1014.39	716.78	1210.44	1460.21	1116.67	799.96
Algeria	DZA	Aquaculture	European eel	European eel	Africa - Inland waters	Freshwater fish	Anguilla anguilla (Linnaeus, 1758)	European eel	3.6	778.11	0	0	0	0	0	0	0	0	44	34	82	69	72	53	46	22	1	0	22	20	17	17	22	15	23	32	33	16	16	15	7	15	11.73	14.2	4.22	0	0.41	0	0
Algeria	DZA	Aquaculture	European seabass	European seabass	Mediterranean and Black Sea	Marine fish	Dicentrarchus labrax (Linnaeus, 1758)	European seabass	3.5	1103.94	0	0	0	0	0	0	0	0	2	4	5	6	7	5	2	4	3	6	5	10	10	10	0	0	0	0	0	3	3	3	0	1	1.34	14.69	50.5	85.31	202.04	0.2	246.12
Algeria	DZA	Aquaculture	Freshwater bream	Freshwater bream	Africa - Inland waters	Freshwater fish	Abramis brama (Linnaeus, 1758)	Freshwater bream	3.1	154.7	0	0	0	0	0	0	0	0	0	0	0	0	0	0	0	0	0	0	0	0	0	0	0	0	0	0	0	0	0	0	0	0	0	0	0	34.12	30.06	10.91	69.6
Algeria	DZA	Aquaculture	Freshwater fishes nei	Freshwater fish	Africa - Inland waters	Freshwater fish	Weighted mean	Freshwater fish	2.5421	1525.06	0	0	0	0	0	0	0	0	0	0	0	7	0	0	13	2	0	15	2	3	3	3	0	0	0	0	0	1	1	1	40	23	366.19	257.35	180.11	145.82	71.87	121.61	91.08
Algeria	DZA	Aquaculture	Gilthead seabream	Gilthead seabream	Mediterranean and Black Sea	Marine fish	Sparus aurata Linnaeus, 1758	Gilthead seabream	3.7	5659.98	0	0	0	0	0	0	0	0	1	0	0	0	0	0	2	1	0	1	1	0	0	0	8	18	26	32	34	1	1	1	0	0	3.49	28.33	64.93	109.18	161.35	348.64	650.82
Algeria	DZA	Aquaculture	Grass carp(=White amur)	Grass carp	Africa - Inland waters	Freshwater fish	Ctenopharyngodon idella (Valenciennes, 1844)	Grass carp	2	9894.01	0	0	0	0	0	0	0	0	2	14	42	122	166	252	281	46	113	180	278	270	235	235	218	184	255	324	342	369	548	331	216	316	400	340	240	400	490	370	270
Algeria	DZA	Aquaculture	Long-finned charr	Long-finned charr	Africa - Inland waters	Freshwater fish	Salvethymus svetovidovi Chereshnev & Skopets, 1990	Long-finned charr	3.7	103.39	0	0	0	0	0	0	0	0	0	0	0	0	0	0	0	0	0	0	0	0	0	0	0	0	0	0	0	0	0	0	0	0	0	0	0	0	0	0	0
Algeria	DZA	Aquaculture	Mullets nei	Mullet	Africa - Inland waters	Freshwater fish	Mugil cephalus Linnaeus, 1758	Mullet	2.5	685.22	0	0	0	0	0	0	0	0	22	25	30	36	32	20	19	18	8	55	50	30	26	26	12	18	25	32	34	1	1	1	9	6	51.71	24.95	4.39	5.53	6.07	0.35	1.68
Algeria	DZA	Aquaculture	North African catfish	North African catfish	Africa - Inland waters	Freshwater fish	Clarias gariepinus (Burchell, 1822)	North African catfish	3.8	578.78	0	0	0	0	0	0	0	0	0	0	0	0	0	0	0	0	0	0	0	0	0	0	0	0	0	0	0	0	0	0	0	0	0	0	0	0	0	0	0
Algeria	DZA	Aquaculture	Pike-perch	Pike-perch	Africa - Inland waters	Freshwater fish	Sander lucioperca (Linnaeus, 1758)	Pike-perch	4	181.66	0	0	0	0	0	0	0	0	0	0	1	1	2	4	4	4	2	5	2	3	3	3	0	0	0	0	0	0	0	0	0	0	0	2.98	4.9	12.74	16.12	10.3	12.42
Algeria	DZA	Aquaculture	Tilapias nei	Tilapia	Africa - Inland waters	Freshwater fish	A38	Tilapia	2.15714	1342.46	0	0	0	0	0	0	0	0	0	0	0	0	0	0	0	0	0	0	0	0	0	0	0	0	0	0	0	0	0	0	0	0	296.79	266.45	218.3	26.37	14.01	1.95	22.66
Angola	AGO	Capture	Albacore	Albacore	Atlantic, Southeast	Marine fish	Thunnus alalunga (Bonnaterre, 1788)	Albacore	4.3	216	0	0	0	0	0	0	0	0	0	0	0	0	0	0	0	0	0	0	0	0	0	0	0	0	0	0	0	0	0	0	0	0	0	0	0	0	168	0	5
Angola	AGO	Capture	Atlantic bonito	Atlantic bonito	Atlantic, Southeast	Marine fish	Sarda sarda (Bloch, 1793)	Atlantic bonito	4.5	14450	831	938	531	251	377	196	253	124	225	120	101	144	180	168	128	102	4	49	20	9	39	32	0	2	118	1157	118	762	0	138	900	931	0	1962	1997	131	267	1134	2
Angola	AGO	Capture	Atlantic bumper	Atlantic bumper	Atlantic, Southeast	Marine fish	Chloroscombrus chrysurus (Linnaeus, 1766)	Atlantic bumper	3.5	2760	0	103	270	331	264	383	776	0	319	314	0	0	0	0	0	0	0	0	0	0	0	0	0	0	0	0	0	0	0	0	0	0	0	0	0	0	0	0	0
Angola	AGO	Capture	Atlantic chub mackerel	Atlantic chub mackerel	Atlantic, Southeast	Marine fish	Scomber colias Gmelin, 1789	Atlantic chub mackerel	3.9	239497	0	536	391	647	57	49	38	0	0	0	0	0	0	0	0	0	0	0	0	0	0	0	0	0	0	0	0	9703	6574	6000	6573	6435	7555	10054	10100	10100	10200	10200	10335
Angola	AGO	Capture	Barracudas nei	Barracuda	Atlantic, Southeast	Marine fish	C11	Barracuda	4.46667	20072	0	0	0	0	0	0	0	0	0	0	0	0	0	0	0	0	0	0	0	0	0	0	0	119	0	0	0	0	0	0	0	16	3	32	800	1500	2200	2900	3768
Angola	AGO	Capture	Bigeye grunt	Bigeye grunt	Atlantic, Southeast	Marine fish	Brachydeuterus auritus (Valenciennes, 1832)	Bigeye grunt	3	73358	0	0	0	0	0	0	0	0	0	0	0	0	0	0	0	0	0	17	75	124	146	228	262	167	191	1176	4078	3662	3484	3000	3075	3168	4157	6097	5200	4400	3600	2800	2009
Angola	AGO	Capture	Bigeye tuna	Bigeye tuna	Atlantic, Southeast	Marine fish	Thunnus obesus (Lowe, 1839)	Bigeye tuna	4.5	4858	0	0	0	0	0	0	0	0	0	0	0	0	0	0	0	0	0	0	0	0	0	0	0	0	0	0	0	0	476	75	0	0	0	452	410	320	394	375	372
Angola	AGO	Capture	Black seabream	Black seabream	Atlantic, Southeast	Marine fish	Spondyliosoma cantharus (Linnaeus, 1758)	Black seabream	3.3	3475	0	0	0	65	28	105	34	0	0	0	0	0	0	0	0	0	0	0	0	0	0	0	93	129	212	494	13	1	1065	300	0	211	195	26	50	75	100	125	154
Angola	AGO	Capture	Bluefish	Bluefish	Atlantic, Southeast	Marine fish	Pomatomus saltatrix (Linnaeus, 1766)	Bluefish	4.5	7117	0	0	0	0	0	0	0	0	51	0	66	0	0	0	0	0	0	0	0	0	0	0	0	0	0	167	0	0	0	0	720	0	0	6	14	22	30	37	45
Angola	AGO	Capture	Bogue	Bogue	Atlantic, Southeast	Marine fish	Boops boops (Linnaeus, 1758)	Bogue	2.8	386	0	0	91	28	11	79	177	0	0	0	0	0	0	0	0	0	0	0	0	0	0	0	0	0	0	0	0	0	0	0	0	0	0	0	0	0	0	0	0
Angola	AGO	Capture	Frigate and bullet tunas	Bullet tuna	Atlantic, Southeast	Marine fish	Auxis rochei (Risso, 1810)	Bullet tuna	4.4	4009	27	197	357	357	256	351	515	212	256	90	21	115	20	70	28	1	0	4	6	21	29	12	31	2	301	206	114	35	0	0	0	95	4	64	19	59	39	22	47
Angola	AGO	Capture	Canary drum(=Baardman)	Canary drum	Atlantic, Southeast	Marine fish	Umbrina canariensis Valenciennes, 1843	Canary drum	3.4	14130	0	0	0	0	0	0	0	0	0	0	0	0	0	0	0	0	0	0	0	0	0	0	0	830	0	2202	0	2605	1357	1500	4502	1134	0	0	0	0	0	0	0
Angola	AGO	Capture	Cape horse mackerel	Cape horse mackerel	Atlantic, Southeast	Marine fish	Trachurus capensis Castelnau, 1861	Cape horse mackerel	3.5	96846	253	105	226	410	190	26	117	0	0	0	0	0	0	0	0	0	0	0	0	0	0	0	0	0	0	0	0	0	0	0	0	0	0	0	0	0	0	0	36351
Angola	AGO	Capture	Conger eels, etc. nei	Conger eel	Atlantic, Southeast	Marine fish	C36	Conger eel	4.1	5018	0	51	386	153	21	25	51	51	3	0	0	0	0	0	0	0	0	0	0	0	0	0	0	0	0	0	0	1511	0	1300	1466	0	0	0	0	0	0	0	0
Angola	AGO	Capture	Marine crabs nei	Crab	Atlantic, Southeast	Crustacean	Crustacean	Crustacean	2.5	20616	0	0	0	0	0	0	0	0	0	0	0	0	0	0	0	0	0	0	0	0	0	0	0	602	800	836	1400	1111	1596	900	296	172	103	117	500	800	1100	1400	1779
Angola	AGO	Capture	West African geryon	Crab	Atlantic, Southeast	Crustacean	Crustacean	Crustacean	2.5	1671	0	0	0	0	0	0	0	0	0	0	0	0	0	0	0	0	0	0	0	0	0	0	0	0	0	0	0	0	0	0	0	0	0	0	0	0	0	0	0
Angola	AGO	Capture	Crevalle jack	Crevalle jack	Atlantic, Southeast	Marine fish	Caranx hippos (Linnaeus, 1766)	Crevalle jack	3.6	15412	0	1197	567	381	1046	664	953	953	304	987	415	11	227	59	124	13	0	15	43	42	39	16	89	302	1835	674	271	992	943	700	643	0	14	0	0	0	0	0	0
Angola	AGO	Capture	West African croakers nei	Croaker	Atlantic, Southeast	Marine fish	C318	Croaker	3.78571	308703	0	0	0	0	0	0	0	0	0	0	0	111	172	1427	1139	1071	1044	1745	2962	1035	4044	1606	7095	8936	8005	8725	25946	18896	18289	17000	19280	15268	21887	19141	17700	16250	14800	13350	11921
Angola	AGO	Capture	Croakers, drums nei	Croaker, drum	Atlantic, Southeast	Marine fish	C41	Croaker and drum	4.03333	30558	1622	2800	2071	2579	1111	845	1034	0	0	0	0	0	0	0	0	0	129	45	33	5	0	12	70	91	29	594	1332	2349	0	2000	2185	1851	1908	1111	900	700	500	300	143
Angola	AGO	Capture	Cunene horse mackerel	Cunene horse mackerel	Atlantic, Southeast	Marine fish	Trachurus trecae Cadenat, 1950	Cunene horse mackerel	3.5	1852011	30168	33764	41595	56723	36873	49686	49135	49135	5912	19297	19069	17614	52463	59600	64928	34573	31475	43970	29459	25308	19764	35797	39739	47719	53243	40898	43292	28123	34863	30000	33563	31659	44395	13826	30000	45000	60000	75000	94354
Angola	AGO	Capture	Dentex nei	Dentex	Atlantic, Southeast	Marine fish	C48	Dentex	4	450443	1840	780	991	872	249	173	328	328	136	124	115	26	19	375	466	520	941	2490	2883	7283	2624	1567	8683	8758	13765	16080	8948	18186	17879	18000	22660	22098	26156	33802	30000	27000	24000	21000	18547
Angola	AGO	Capture	European anchovy	European anchovy	Atlantic, Southeast	Marine fish	Engraulis encrasicolus (Linnaeus, 1758)	European anchovy	3.1	9894	1519	16	1974	2564	288	1722	1354	0	0	0	1	0	0	0	0	0	0	0	0	0	0	0	0	0	0	0	0	0	0	0	0	0	0	0	0	0	0	0	45
Angola	AGO	Capture	False scad	False scad	Atlantic, Southeast	Marine fish	Caranx rhonchus Geoffroy Saint-Hilaire, 1817	False scad	3.6	1956	0	0	164	89	28	270	265	265	64	790	21	0	0	0	0	0	0	0	0	0	0	0	0	0	0	0	0	0	0	0	0	0	0	0	0	0	0	0	0
Angola	AGO	Capture	Flatfishes nei	Flatfish	Atlantic, Southeast	Marine fish	C61	Flatfish	3.7	129513	335	216	368	72	50	40	82	82	8	27	37	13	15	33	323	235	467	784	428	97	195	120	928	912	592	1928	3463	3069	2636	2000	1336	12275	3762	3479	3800	4100	4400	4700	4974
Angola	AGO	Capture	Groupers nei	Grouper	Atlantic, Eastern Central	Marine fish	C95	Grouper	4.1	2411	0	0	0	0	0	0	0	0	0	0	0	0	0	0	0	0	0	0	0	0	0	0	0	0	0	0	0	0	0	0	0	0	0	0	0	0	0	0	0
Angola	AGO	Capture	Groupers, seabasses nei	Grouper, seabass	Atlantic, Southeast	Marine fish	C95	Grouper and seabass	4.1	46577	188	74	125	499	41	55	129	0	15	35	3	2	6	27	282	11	5	5	66	235	1002	460	1326	347	2341	4214	5774	4513	5418	4000	4118	3391	1695	1533	1300	1050	800	550	335
Angola	AGO	Capture	Grunts, sweetlips nei	Grunt, sweetlips	Atlantic, Southeast	Marine fish	C96	Grunt and sweetlips	3.48	60125	380	581	481	1818	821	403	1975	1975	16	0	11	0	0	3	18	0	0	67	78	149	1031	557	438	412	799	1688	3513	1880	2142	1500	1142	955	387	4179	4500	4700	4900	5100	5458
Angola	AGO	Capture	John dory	John dory	Atlantic, Southeast	Marine fish	Zeus faber Linnaeus, 1758	John dory	4.5	67681	0	0	0	0	0	0	0	0	12	509	810	0	0	124	163	13	27	299	770	72	315	307	1339	1668	1582	1303	2061	2681	2792	2000	1493	1473	541	866	1150	1400	1650	1900	2187
Angola	AGO	Capture	Large-eye dentex	Large-eye dentex	Atlantic, Southeast	Marine fish	Dentex macrophthalmus (Bloch, 1791)	Large-eye dentex	3.5	11715	0	0	0	0	0	0	0	0	0	0	0	0	0	0	0	0	0	0	0	0	0	0	0	0	0	0	0	0	0	0	0	0	0	0	0	0	0	0	0
Angola	AGO	Capture	Largehead hairtail	Largehead hairtail	Atlantic, Southeast	Marine fish	Trichiurus lepturus Linnaeus, 1758	Largehead hairtail	4.4	87673	6845	9929	4455	1971	3801	6944	4867	0	0	0	0	0	0	0	0	0	0	0	0	0	0	0	0	28	623	0	6579	6773	0	0	0	0	0	0	0	0	0	0	8901
Angola	AGO	Capture	Leerfish	Leerfish	Atlantic, Southeast	Marine fish	Lichia amia (Linnaeus, 1758)	Leerfish	4.5	113	0	0	0	29	52	13	8	8	3	0	0	0	0	0	0	0	0	0	0	0	0	0	0	0	0	0	0	0	0	0	0	0	0	0	0	0	0	0	0
Angola	AGO	Capture	Little tunny(=Atl.black skipj)	Little tunny	Atlantic, Southeast	Marine fish	Euthynnus alletteratus (Rafinesque, 1810)	Little tunny	4.5	56288	10	1326	826	646	1328	1171	1734	1632	1632	1433	1167	1345	1148	1225	285	306	14	175	121	117	235	75	406	118	132	231	155	1813	0	2	1654	4365	1373	129	1759	3455	1905	1085	1240
Angola	AGO	Capture	Lobsters nei	Lobster	Atlantic, Southeast	Crustacean	Crustacean	Crustacean	2.5	11347	0	0	0	0	0	0	0	0	0	0	0	0	0	0	0	0	0	0	0	0	0	0	0	0	0	1062	1000	655	783	500	483	487	290	862	860	857	854	851	848
Angola	AGO	Capture	Marine fishes nei	Marine fish	Atlantic, Eastern Central	Marine fish	Weighted mean	Marine fish	4.00538	3985	400	400	400	400	400	400	148	148	148	148	148	148	148	148	9	0	0	0	0	0	0	0	0	0	0	0	144	165	0	0	83	0	0	0	0	0	0	0	0
Angola	AGO	Capture	Marine fishes nei	Marine fish	Atlantic, Southeast	Marine fish	Weighted mean	Marine fish	3.53508	1913667	1808	1396	4596	3841	540	2236	3862	45947	65031	37276	30183	71530	38458	45487	42579	53399	53026	52634	64541	44922	80633	74578	43038	32185	30788	80741	78416	20302	34510	20119	22785	38053	39703	37710	47755	61290	71154	78091	46782
Angola	AGO	Capture	Mullets nei	Mullet	Atlantic, Southeast	Marine fish	C161	Mullet	2.53333	2960	308	560	344	363	299	356	320	320	50	0	0	0	0	0	0	0	0	0	0	0	0	0	0	0	0	0	0	0	0	0	0	0	0	0	0	0	0	0	0
Angola	AGO	Capture	Octopuses, etc. nei	Octopus	Atlantic, Eastern Central	Cephalopod	Cephalopod	Cephalopod	3	284	0	0	0	0	0	0	0	0	0	0	0	0	0	0	2	0	0	0	0	0	0	0	0	0	0	0	43	150	0	0	89	0	0	0	0	0	0	0	0
Angola	AGO	Capture	Octopuses, etc. nei	Octopus	Atlantic, Southeast	Cephalopod	Cephalopod	Cephalopod	3	4442	0	0	0	0	0	0	0	0	0	0	0	0	0	0	0	0	4	0	0	0	0	0	0	45	0	0	0	0	0	0	0	8	6	411	400	380	360	340	326
Angola	AGO	Capture	Pelagic percomorphs nei	Pelagic fish	Atlantic, Southeast	Marine fish	Weighted mean	Pelagic fish	3.53508	2110	0	173	324	96	49	763	705	0	0	0	0	0	0	0	0	0	0	0	0	0	0	0	0	0	0	0	0	0	0	0	0	0	0	0	0	0	0	0	0
Angola	AGO	Capture	Pemarco blackfish	Pemarco blackfish	Atlantic, Southeast	Marine fish	Schedophilus pemarco (Poll, 1959)	Pemarco blackfish	4	5261	0	0	0	0	0	0	0	0	0	0	0	0	0	0	0	0	0	0	0	0	0	0	0	0	0	0	0	0	0	0	0	4683	487	91	0	0	0	0	0
Angola	AGO	Capture	Picarels nei	Picarel	Atlantic, Southeast	Marine fish	Spicara smaris (Linnaeus, 1758)	Picarel	3	13571	445	1493	1692	1495	836	2121	1664	0	0	20	0	30	60	82	2	31	52	407	113	9	7	0	55	188	13	744	674	454	0	400	484	0	0	0	0	0	0	0	0
Angola	AGO	Capture	Pompano	Pompano	Atlantic, Southeast	Marine fish	Trachinotus ovatus (Linnaeus, 1758)	Pompano	3.7	484	0	0	0	0	0	0	0	0	0	0	0	0	0	0	0	0	0	0	0	0	0	0	0	0	0	0	0	0	484	0	0	0	0	0	0	0	0	0	0
Angola	AGO	Capture	Porgies, seabreams nei	Porgy, seabream	Atlantic, Southeast	Marine fish	C188	Porgy and seabream	3.55	1344	0	0	0	0	0	0	0	0	0	0	0	0	0	0	0	0	1344	0	0	0	0	0	0	0	0	0	0	0	0	0	0	0	0	0	0	0	0	0	0
Angola	AGO	Capture	Rays, stingrays, mantas nei	Ray, stingray, manta	Atlantic, Southeast	Marine fish	C202	Ray and stingray and manta	3.72	38239	0	0	0	0	0	0	0	0	16	14	10	9	41	1	448	0	696	860	568	215	21	16	750	1399	593	1430	2696	1641	1876	1700	1876	5686	172	822	950	1060	1170	1280	1397
Angola	AGO	Capture	Red pandora	Red pandora	Atlantic, Southeast	Marine fish	Pagellus bellottii Steindachner, 1882	Red pandora	3.6	3182	1222	326	438	599	166	291	140	0	0	0	0	0	0	0	0	0	0	0	0	0	0	0	0	0	0	0	0	0	0	0	0	0	0	0	0	0	0	0	0
Angola	AGO	Capture	Pargo breams nei	Red porgy	Atlantic, Southeast	Marine fish	Pagrus pagrus (Linnaeus, 1758)	Red porgy	3.9	59890	0	0	0	0	0	0	0	0	21	19	1	0	2	8	18	60	151	334	246	39	95	716	1077	183	1840	4484	5773	3932	3616	3700	4616	1671	1085	977	1700	2500	3300	4100	4875
Angola	AGO	Capture	Sand steenbras	Sand steenbras	Atlantic, Southeast	Marine fish	Lithognathus mormyrus (Linnaeus, 1758)	Sand steenbras	3.4	38620	941	297	254	264	271	74	88	0	0	0	0	0	0	0	0	0	0	642	580	279	214	176	1072	726	999	1735	2802	3217	3334	3000	3353	223	772	2031	1960	1900	1840	1780	1709
Angola	AGO	Capture	Sardinellas nei	Sardine	Atlantic, Eastern Central	Marine fish	C209	Sardine	3.16667	272	0	0	0	0	0	0	34	34	34	34	34	34	34	34	0	0	0	0	0	0	0	0	0	0	0	0	0	0	0	0	0	0	0	0	0	0	0	0	0
Angola	AGO	Capture	Sardinellas nei	Sardine	Atlantic, Southeast	Marine fish	C209	Sardine	3.16667	2505806	21085	47949	46092	22490	22752	49385	27627	0	12552	28701	21556	7927	24253	19906	11905	18054	14742	12357	19731	34211	17484	21014	45483	57579	108211	57896	28513	44955	58569	46000	50000	66837	68049	74184	79000	84000	89000	94000	98110
Angola	AGO	Capture	Sargo breams nei	Seabream	Atlantic, Southeast	Marine fish	C214	Seabream	3.3	2610	0	713	532	276	156	414	232	232	55	0	0	0	0	0	0	0	0	0	0	0	0	0	0	0	0	0	0	0	0	0	0	0	0	0	0	0	0	0	0
Angola	AGO	Capture	Shallow-water Cape hake	Shallow-water Cape hake	Atlantic, Southeast	Marine fish	Merluccius capensis Castelnau, 1861	Shallow-water Cape hake	3.9	100071	0	0	0	0	0	0	0	0	5	16	19	19	5	2	17	109	219	92	24	26	832	777	906	2060	658	1863	3225	1457	1799	1600	1800	5876	2565	2146	3800	5400	7000	8600	10145
Angola	AGO	Capture	Sharks, rays, skates, etc. nei	Shark, ray, skate	Atlantic, Southeast	Marine fish	C328	Shark and ray and skate	4.20556	34704	572	414	1107	282	209	140	183	0	59	38	46	21	71	10	52	35	7	29	35	755	379	90	376	0	157	3354	3236	1438	1746	1600	1746	2855	895	106	500	900	1300	1700	2099
Angola	AGO	Capture	Deep-water rose shrimp	Shrimp	Atlantic, Southeast	Crustacean	Crustacean	Crustacean	2.5	27969	0	0	0	0	0	0	0	0	0	0	0	0	0	0	0	0	0	796	904	682	1367	1175	1900	1101	1600	1660	2200	1500	1677	1350	1200	1069	275	124	450	750	1050	1350	1633
Angola	AGO	Capture	Natantian decapods nei	Shrimp	Atlantic, Eastern Central	Crustacean	Crustacean	Crustacean	2.5	197	0	0	0	0	0	0	0	0	0	0	0	0	0	0	63	0	0	0	0	0	0	0	0	0	0	0	58	70	0	0	6	0	0	0	0	0	0	0	0
Angola	AGO	Capture	Natantian decapods nei	Shrimp	Atlantic, Southeast	Crustacean	Crustacean	Crustacean	2.5	4998	329	90	253	98	456	88	58	58	32	883	75	168	297	261	121	70	598	387	676	0	0	0	0	0	0	0	0	0	0	0	0	0	0	0	0	0	0	0	0
Angola	AGO	Capture	Striped red shrimp	Shrimp	Atlantic, Southeast	Crustacean	Crustacean	Crustacean	2.5	22596	0	0	0	0	0	0	0	0	0	0	0	0	0	0	716	528	590	331	364	538	814	543	876	820	1154	1200	1553	1133	0	0	0	913	299	253	600	900	1200	1450	1722
Angola	AGO	Capture	Silver scabbardfish	Silver scabbardfish	Atlantic, Southeast	Marine fish	Lepidopus caudatus (Euphrasen, 1788)	Silver scabbardfish	3.8	1628	0	0	0	0	0	0	0	0	0	0	0	0	0	0	0	0	0	0	0	0	0	0	0	0	0	0	0	0	0	0	0	0	0	0	0	0	0	0	0
Angola	AGO	Capture	Skipjack tuna	Skipjack tuna	Atlantic, Southeast	Marine fish	Katsuwonus pelamis (Linnaeus, 1758)	Skipjack tuna	4.4	41769	1514	4036	3501	3628	3482	2532	2257	318	46	131	56	80	30	85	69	66	41	13	7	3	15	52	2	32	14	687	14	14	10	0	0	0	0	50	636	44	91	514	12
Angola	AGO	Capture	Sea catfishes nei	Smoothmouth sea catfish	Atlantic, Southeast	Marine fish	Carlarius heudelotii (Valenciennes, 1840)	Smoothmouth sea catfish	3.8	116501	387	227	548	258	32	38	179	179	45	35	21	6	20	2	212	2	0	35	17	8	1	43	90	69	407	2424	3616	3176	3621	3200	3483	5404	13901	11166	10000	9000	8000	7000	5993
Angola	AGO	Capture	Southern African pilchard	South American pilchard	Atlantic, Southeast	Marine fish	Sardinops sagax (Jenyns, 1842)	South American pilchard	2.8	77699	0	0	0	0	0	0	0	0	0	0	0	0	0	0	0	0	0	0	0	0	0	0	0	0	0	0	0	0	0	0	0	13771	2389	0	4700	7000	9300	11600	13987
Angola	AGO	Capture	Southern meagre(=Mulloway)	Southern meagre	Atlantic, Southeast	Marine fish	Argyrosomus hololepidotus (Lacepède, 1801)	Southern meagre	4.5	211831	0	0	0	0	0	0	0	0	305	835	1768	0	0	0	0	0	0	0	0	0	0	0	0	259	0	2540	0	3787	4758	4400	4758	12878	26765	17313	16700	16000	15300	14600	13940
Angola	AGO	Capture	Cuttlefish, bobtail squids nei	Squid	Atlantic, Eastern Central	Cephalopod	Cephalopod	Cephalopod	3	414	0	0	0	0	0	0	0	0	0	0	0	0	0	0	20	0	0	0	0	0	0	0	0	0	0	0	225	55	0	0	114	0	0	0	0	0	0	0	0
Angola	AGO	Capture	Cuttlefish, bobtail squids nei	Squid	Atlantic, Southeast	Cephalopod	Cephalopod	Cephalopod	3	18167	0	0	0	0	0	0	0	0	0	0	0	0	0	0	0	0	237	32	0	0	0	0	0	0	0	0	1500	1066	1007	700	678	694	322	844	1000	1200	1350	1500	1715
Angola	AGO	Capture	Various squids nei	Squid	Atlantic, Southeast	Cephalopod	Cephalopod	Cephalopod	3	13515	508	214	95	18	24	72	87	87	14	3	0	0	27	170	94	139	352	228	191	122	42	0	390	463	442	292	1000	825	750	500	480	19	65	38	100	160	220	280	347
Angola	AGO	Capture	Swordfish	Swordfish	Atlantic, Southeast	Marine fish	Xiphias gladius Linnaeus, 1758	Swordfish	4.5	1379	0	0	0	0	0	0	0	0	26	228	815	84	84	84	0	0	0	0	0	0	0	0	0	0	0	0	0	0	0	3	0	0	0	0	0	0	0	0	18
Angola	AGO	Capture	Threadfins, tasselfishes nei	Threadfin	Atlantic, Southeast	Marine fish	C284	Threadfin	3.8	79075	0	0	0	0	0	0	0	0	10	60	31	2	5	4	585	256	19	136	309	259	370	265	520	1378	872	1834	2664	3082	3297	3000	3945	4972	7603	5724	5200	4650	4100	3550	3065
Angola	AGO	Capture	Tuna-like fishes nei	Tuna, bonito	Atlantic, Southeast	Marine fish	C309	Tuna and bonito	4.45556	10891	0	0	0	0	0	0	0	0	0	0	0	0	0	0	0	0	0	0	0	0	0	0	0	0	0	0	0	206	330	0	0	0	0	3918	2520	413	1146	2300	36
Angola	AGO	Capture	West African ilisha	West African ilisha	Atlantic, Southeast	Marine fish	Ilisha africana (Bloch, 1795)	West African ilisha	3.6	67763	0	0	0	0	0	0	0	0	0	0	0	0	0	0	0	0	0	0	0	0	0	0	0	0	0	0	0	0	0	0	0	15217	17616	8930	8000	7000	6000	5000	0
Angola	AGO	Capture	West African Spanish mackerel	West African Spanish mackerel	Atlantic, Southeast	Marine fish	Scomberomorus tritor (Cuvier, 1832)	West African Spanish mackerel	4.4	9732	0	20	81	24	70	68	138	0	0	0	0	0	0	0	0	0	0	0	0	0	0	0	0	0	0	0	0	0	0	3518	0	0	0	86	1650	249	221	1386	914
Angola	AGO	Capture	West coast sole	West coast sole	Atlantic, Southeast	Marine fish	Austroglossus microlepis (Bleeker, 1863)	West coast sole	3.5	49816	0	0	0	0	0	0	0	0	0	0	0	0	0	0	0	0	0	0	0	0	0	0	0	0	0	0	0	0	8287	6800	6987	10218	868	831	800	800	800	750	0
Angola	AGO	Capture	Yellowfin tuna	Yellowfin tuna	Atlantic, Southeast	Marine fish	Thunnus albacares (Bonnaterre, 1788)	Yellowfin tuna	4.4	24575	1005	2085	2296	904	558	959	1467	788	237	350	59	51	246	67	292	510	441	211	137	216	78	70	115	170	35	34	34	34	34	111	669	405	98	701	520	485	191	0	541
Angola	AGO	Capture	Yellowtail amberjack	Yellowtail amberjack	Atlantic, Southeast	Marine fish	Seriola lalandi Valenciennes, 1833	Yellowtail amberjack	4.2	2093	0	0	0	4	35	15	18	0	0	0	0	0	0	0	0	0	0	0	0	0	0	0	0	0	0	0	0	0	0	0	0	0	0	0	0	0	0	0	0
Angola	AGO	Capture	Demersal percomorphs nei	Demersal percomorph	Atlantic, Southeast	Marine fish	Demersal percomorph	Demersal percomorph	4	2893	0	401	208	546	357	304	954	0	46	76	1	0	0	0	0	0	0	0	0	0	0	0	0	0	0	0	0	0	0	0	0	0	0	0	0	0	0	0	0
Angola	AGO	Capture	Freshwater fishes nei	Freshwater fish	Africa - Inland waters	Freshwater fish	Weighted mean	Freshwater fish	2.90538	484432	7000	7000	7000	7000	7500	7500	7500	7500	7500	7500	8000	8000	8000	8000	8000	7000	7000	7000	7000	6000	6000	6000	6000	6000	7000	8000	9000	10000	10000	10000	10500	9000	7500	5848	10000	14000	18000	23000	28887
Angola	AGO	Aquaculture	Tilapias nei	Tilapia	Africa - Inland waters	Freshwater fish	A38	Tilapia	2.15714	8831	0	0	0	0	0	0	0	0	0	0	0	0	0	0	0	0	0	0	0	0	0	0	0	0	5	10	50	70	90	120	150	180	180	250	300	300	300	47	305
Angola	AGO	Aquaculture	Torpedo-shaped catfishes nei	Catfish	Africa - Inland waters	Freshwater fish	A40	Catfish	3.525	157	0	0	0	0	0	0	0	0	0	0	0	0	0	0	0	0	0	0	0	0	0	0	0	0	0	1	1	2	2	6	6	10	10	10	10	10	10	10	0
Argentina	ARG	Capture	[Leporinus obtusidens]	/	America, South - Inland waters	Freshwater fish	Megaleporinus obtusidens (Valenciennes, 1837)	/	3.2	3955	0	0	0	0	0	0	0	0	0	0	0	0	0	0	0	0	0	0	0	0	0	0	0	0	0	0	0	0	0	0	0	0	0	264	1	669	406	91	140
Argentina	ARG	Capture	Albacore	Albacore	Atlantic, Southwest	Marine fish	Thunnus alalunga (Bonnaterre, 1788)	Albacore	4.3	2931	48	80	8	0	4	2	7	55	209	153	356	469	344	354	151	60	306	0	2	0	0	120	0	0	0	0	0	12	18	0	0	0	0	0	130	43	0	0	0
Argentina	ARG	Capture	American harvestfish	American harvestfish	Atlantic, Southwest	Marine fish	Peprilus paru (Linnaeus, 1758)	American harvestfish	4.5	10254	0	0	0	0	0	0	0	0	0	0	0	0	0	0	0	0	0	0	0	0	0	0	0	0	0	137	67	149	118	423	709	1210	1202	1364	1463	788	444	310	325
Argentina	ARG	Capture	Antarctic toothfish	Antarctic toothfish	Pacific, Antarctic	Marine fish	Dissostichus mawsoni Norman, 1937	Antarctic toothfish	3.9	860	0	0	0	0	0	0	0	0	0	0	0	0	0	0	0	0	0	0	0	0	0	0	0	0	0	0	0	0	162	253	213	194	0	0	38	0	0	0	0
Argentina	ARG	Capture	Argentine anchovy	Argentine anchovy	Atlantic, Southwest	Marine fish	Engraulis anchoita Hubbs & Marini, 1935	Argentine anchovy	2.5	805244	20426	21770	16102	19853	10702	12371	10098	10577	9700	12047	15712	19369	19468	20730	13100	20615	19728	19149	19438	24457	21001	25198	13350	10659	12158	12815	21324	28428	37266	34403	31385	27824	22887	27754	26323	21084	15434	18081	13955
Argentina	ARG	Capture	Argentine angelshark	Argentine angelshark	Atlantic, Southwest	Marine fish	Squatina argentina (Marini, 1930)	Argentine angelshark	4.1	110169	0	0	0	0	0	0	0	0	0	0	0	0	0	0	3242	4167	3647	4080	3662	3802	4281	4410	4310	3803	3123	3840	2812	3555	3767	3863	4218	4293	5214	5065	5252	4509	3643	2854	3010
Argentina	ARG	Capture	Argentine conger	Argentine conger	Atlantic, Southwest	Marine fish	Conger orbignianus Valenciennes, 1837	Argentine conger	3.7	1279	48	105	57	24	6	7	12	10	61	141	72	19	20	21	19	19	17	13	44	21	22	28	81	18	14	95	43	34	23	18	32	4	15	12	31	16	9	9	5
Argentina	ARG	Capture	Argentine croaker	Argentine croaker	Atlantic, Southwest	Marine fish	Umbrina canosai Berg, 1895	Argentine croaker	3.9	73111	3661	2145	1807	812	1533	1229	650	220	208	56	309	180	176	564	373	436	399	90	921	3561	6770	2753	1956	1433	421	2083	1539	1668	1889	2548	4702	3859	2483	3085	3094	2327	3432	2215	1773
Argentina	ARG	Capture	Argentine goatfish	Argentine goatfish	Atlantic, Southwest	Marine fish	Mullus argentinae Hubbs & Marini, 1933	Argentine goatfish	3.5	5120	0	0	0	0	0	0	0	0	0	0	0	0	0	0	0	0	134	20	26	63	75	73	99	229	498	225	78	88	178	238	416	350	304	447	357	315	189	75	56
Argentina	ARG	Capture	Argentine hake	Argentine hake	Atlantic, Southwest	Marine fish	Merluccius hubbsi Marini, 1933	Argentine hake	4.2	14309076	174906	281848	341161	370905	277350	228729	281862	257100	183224	259334	270558	304078	296026	294333	341042	409250	392979	451564	465368	574317	604208	585679	458569	314073	193700	249443	358819	334098	416739	361971	353109	301691	263323	280679	281757	287780	257983	275059	259202
Argentina	ARG	Capture	Argentine seabass	Argentine seabass	Atlantic, Southwest	Marine fish	Acanthistius brasilianus (Cuvier, 1828)	Argentine seabass	4	299938	1700	3970	4977	5090	12690	16223	24351	10891	8682	15938	11936	11529	10466	14204	7546	6954	6779	9755	7934	10926	10742	9117	5216	6360	4134	4881	3622	4029	5034	5982	4343	4455	4562	4672	4198	3711	2125	2462	1846
Argentina	ARG	Capture	Argentinian sandperch	Argentinian sandperch	Atlantic, Southwest	Marine fish	Pseudopercis semifasciata (Cuvier, 1829)	Argentinian sandperch	3.9	118093	1589	1583	2239	4103	3162	2784	5916	3288	4189	5673	4329	4147	4550	5275	2949	5460	2791	3774	3046	3023	3452	2487	2223	2817	1910	2007	1778	2232	2237	2902	2724	2627	2602	2258	1759	1473	1230	1116	912
Argentina	ARG	Capture	Argentinian silverside	Argentinian silverside	America, South - Inland waters	Freshwater fish	Odontesthes bonariensis (Valenciennes, 1835)	Argentinian silverside	2.6	4146	0	0	0	0	0	0	0	0	0	0	0	0	0	0	0	0	0	0	0	0	0	0	0	0	0	0	0	0	0	0	0	0	0	241	0	444	351	0	0
Argentina	ARG	Capture	Atlantic bonito	Atlantic bonito	Atlantic, Southwest	Marine fish	Sarda sarda (Bloch, 1793)	Atlantic bonito	4.5	28457	283	2026	1746	1288	2600	846	1775	310	2058	1399	699	1607	2794	1327	1207	1794	1559	448	4	138	108	130	12	68	19	235	1	129	269	110	180	34	7	220	59	6	32	78	264
Argentina	ARG	Capture	Atlantic chub mackerel	Atlantic chub mackerel	Atlantic, Southwest	Marine fish	Scomber colias Gmelin, 1789	Atlantic chub mackerel	3.9	358144	466	987	379	533	764	1599	2142	5250	2577	4393	4806	4197	4654	7966	3736	6235	5023	6884	10533	13442	11195	10468	3224	10172	10122	4602	11616	5036	5008	2388	6081	10631	13354	12830	27433	28253	20794	18161	7589
Argentina	ARG	Capture	Atlantic sabretooth anchovy	Atlantic sabretooth anchovy	America, South - Inland waters	Freshwater fish	Lycengraulis grossidens (Spix & Agassiz, 1829)	Atlantic sabretooth anchovy	3.7	1229	41	84	16	30	80	4	8	0	4	0	7	0	5	110	50	50	50	60	70	80	90	100	100	100	90	0	0	0	0	0	0	0	0	0	0	0	0	0	0
Argentina	ARG	Capture	Bastard halibuts nei	Bastard halibut	Atlantic, Southwest	Marine fish	C14	Bastard halibut	4.15	273474	909	1989	2280	2248	2072	3320	2924	2852	3176	7273	9034	7899	7667	9341	8965	9737	8514	9739	7676	10213	8753	10063	8746	7154	6498	5944	4297	5805	6246	7073	7921	7559	8054	7335	7247	7619	6747	5158	5830
Argentina	ARG	Capture	Bigeye tuna	Bigeye tuna	Atlantic, Southwest	Marine fish	Thunnus obesus (Lowe, 1839)	Bigeye tuna	4.5	663	176	84	23	0	0	0	0	0	0	100	41	72	50	17	78	22	0	0	0	0	0	0	0	0	0	0	0	0	0	0	0	0	0	0	0	0	0	0	0
Argentina	ARG	Capture	Black drum	Black drum	Atlantic, Southwest	Marine fish	Pogonias cromis (Linnaeus, 1766)	Black drum	3.4	4054	11	30	26	3	0	3	28	7	1	1	11	6	32	13	1	1	53	96	11	40	159	81	272	95	13	52	33	152	56	92	10	19	68	66	83	21	367	452	379
Argentina	ARG	Capture	Blackbelly rosefish	Blackbelly rosefish	Atlantic, Southwest	Marine fish	Helicolenus dactylopterus (Delaroche, 1809)	Blackbelly rosefish	3.5	38943	4	20	9	33	10	11	17	26	34	27	2013	77	111	132	953	864	235	705	884	4670	1502	2563	1195	3360	3051	1176	494	549	960	946	1523	1070	1007	2231	1686	1444	325	949	1052
Argentina	ARG	Capture	Bluefish	Bluefish	Atlantic, Southwest	Marine fish	Pomatomus saltatrix (Linnaeus, 1766)	Bluefish	4.5	16327	637	448	53	68	52	347	59	57	129	132	110	598	484	381	241	520	1105	1333	202	565	342	416	15	286	416	181	701	404	525	392	463	69	199	174	629	199	136	645	509
Argentina	ARG	Capture	Brazilian codling	Brazilian codling	Atlantic, Southwest	Marine fish	Urophycis brasiliensis (Kaup, 1858)	Brazilian codling	3.9	18651	0	0	0	0	0	0	0	0	0	0	0	1202	2549	1538	2248	1457	2136	2184	1534	416	297	203	124	165	41	90	309	380	170	111	77	100	92	110	190	140	218	120	56
Argentina	ARG	Capture	Brazilian flathead	Brazilian flathead	Atlantic, Southwest	Marine fish	Percophis brasiliensis Quoy & Gaimard, 1825	Brazilian flathead	4.2	261573	2670	4709	4078	2897	2686	2731	3494	2084	2116	1640	2323	2255	3255	4242	3832	4636	3838	5706	6213	8680	8771	11475	9670	7897	7255	8324	5433	6268	6101	7741	8546	7636	8076	8068	7784	7961	8185	6276	7882
Argentina	ARG	Capture	Brazilian menhaden	Brazilian menhaden	Atlantic, Southwest	Marine fish	Brevoortia aurea (Spix & Agassiz, 1829)	Brazilian menhaden	2.8	14495	460	1243	877	445	473	556	506	0	0	168	455	282	420	755	275	267	357	137	573	294	427	893	104	205	271	265	94	151	275	324	251	480	223	262	170	83	407	309	471
Argentina	ARG	Capture	Broadnose skate	Broadnose skate	Atlantic, Southwest	Marine fish	Bathyraja brachyurops (Fowler, 1910)	Broadnose skate	4.1	360	0	0	0	0	0	0	0	0	0	0	0	0	0	0	0	0	0	0	0	0	0	0	0	0	0	0	0	0	0	0	0	0	0	182	0	42	25	11	41
Argentina	ARG	Capture	Castaneta	Castaneta	Atlantic, Southwest	Marine fish	Nemadactylus bergi (Norman, 1937)	Castaneta	3.2	65920	2931	2766	2575	1858	1506	2700	1348	101	99	24	133	173	406	293	251	74	55	1923	21983	10409	204	744	1827	164	80	98	149	146	682	3048	605	1291	1372	1071	869	696	358	180	171
Argentina	ARG	Capture	Choicy ruff	Choicy ruff	Atlantic, Southwest	Marine fish	Seriolella porosa Guichenot, 1848	Choicy ruff	3.4	84939	0	0	0	0	0	0	0	0	0	0	0	0	0	0	0	0	503	888	1310	1536	2171	2596	2462	3342	3571	4059	5360	5917	5971	3785	6160	4691	6241	6479	2834	2605	1693	1292	2636
Argentina	ARG	Capture	Common carp	Common carp	America, South - Inland waters	Freshwater fish	Cyprinus carpio Linnaeus, 1758	Common carp	3.1	2499	0	0	0	0	0	0	0	0	0	0	0	0	0	0	0	0	0	0	0	0	0	0	0	0	0	0	0	0	0	0	0	0	0	494	633	306	267	0	0
Argentina	ARG	Capture	Marine crabs nei	Crab	Atlantic, Southwest	Crustacean	Crustacean	Crustacean	2.5	2811	5	5	18	25	21	6	57	93	110	173	165	108	128	132	170	204	20	27	16	345	27	34	5	33	14	44	34	23	19	21	62	63	79	57	148	139	24	16	27
Argentina	ARG	Capture	Softshell red crab	Crab	Atlantic, Southwest	Crustacean	Crustacean	Crustacean	2.5	2826	0	0	0	0	0	0	0	0	0	0	0	0	0	0	0	0	37	28	151	0	363	368	321	138	266	213	129	175	167	52	344	29	0	0	0	0	0	0	0
Argentina	ARG	Capture	Southern king crab	Crab	Atlantic, Southwest	Crustacean	Crustacean	Crustacean	2.5	40890	279	322	370	62	77	174	203	179	201	188	195	153	121	120	125	113	143	169	286	380	202	413	155	132	104	88	385	1506	1162	961	845	533	769	325	682	3112	4522	4077	3449
Argentina	ARG	Capture	Marine crustaceans nei	Crustacean	Atlantic, Southwest	Crustacean	Crustacean	Crustacean	2.5	12748	0	0	0	0	0	0	0	0	0	0	0	0	0	0	0	0	0	395	4902	80	2	335	0	7026	0	0	0	0	0	0	0	0	0	7	1	0	0	0	0
Argentina	ARG	Capture	Dorado	Dorado	America, South - Inland waters	Freshwater fish	Coryphaena hippurus Linnaeus, 1758	Dorado	4.4	218	0	0	0	0	0	0	0	0	0	0	0	0	0	0	0	0	0	0	0	0	0	0	0	0	0	0	0	0	0	0	0	0	0	1	2	135	80	0	0
Argentina	ARG	Capture	Antarctic rockcods, noties nei	Emerald rockcod	Atlantic, Southwest	Marine fish	Trematomus bernacchii Boulenger, 1902	Emerald rockcod	3.4	99915	0	0	0	0	0	0	0	0	0	0	0	0	0	0	0	0	0	0	0	0	0	0	0	0	0	182	180	259	469	4170	9842	8355	12433	16645	9448	8575	7937	6518	6850
Argentina	ARG	Capture	Eyespot skate	Eyespot skate	Atlantic, Southwest	Marine fish	Atlantoraja cyclophora (Regan, 1903)	Eyespot skate	3.5	752	0	0	0	0	0	0	0	0	0	0	0	0	0	0	0	0	0	0	0	0	0	0	0	0	0	0	0	0	0	0	0	0	0	73	288	43	35	16	29
Argentina	ARG	Capture	Freshwater fishes nei	Freshwater fish	America, South - Inland waters	Freshwater fish	Weighted mean	Freshwater fish	2.50842	42800	661	606	682	1243	886	592	428	249	157	344	450	266	350	341	308	308	1996	1754	3254	8508	1097	3235	2297	5758	6228	0	102	0	0	181	352	60	107	0	0	0	0	0	0
Argentina	ARG	Capture	Gadiformes nei	Gadiformes	Atlantic, Southwest	Marine fish	C78	Gadiformes	3.8	18021	25	62	6174	2660	633	1708	999	958	222	1847	2685	48	0	0	0	0	0	0	0	0	0	0	0	0	0	0	0	0	0	0	0	0	0	0	0	0	0	0	0
Argentina	ARG	Capture	Freshwater siluroids nei	Granulated catfish	America, South - Inland waters	Freshwater fish	Pterodoras granulosus (Valenciennes, 1821)	Granulated catfish	2.6	61072	2196	2147	1883	3077	2756	2649	1693	1784	3416	2284	4176	3084	3980	2900	3089	3089	1781	1800	1700	1600	1500	1400	1300	1200	1100	292	276	205	287	498	485	684	342	40	82	55	25	1	27
Argentina	ARG	Capture	Grenadiers nei	Grenadiers	Pacific, Antarctic	Marine fish	Coryphaenoides filicauda Günther, 1878	Grenadier	3.5	176	0	0	0	0	0	0	0	0	0	0	0	0	0	0	0	0	0	0	0	0	0	0	0	0	0	0	0	0	59	31	47	35	0	0	4	0	0	0	0
Argentina	ARG	Capture	King weakfish	King weakfish	Atlantic, Southwest	Marine fish	Macrodon ancylodon (Bloch & Schneider, 1801)	King weakfish	3.9	7037	22	4	83	18	16	50	62	20	11	4	55	4	8	3	0	0	0	11	9	149	380	224	181	88	44	64	90	108	171	239	139	198	167	317	136	117	220	1163	925
Argentina	ARG	Capture	Largehead hairtail	Largehead hairtail	Atlantic, Southwest	Marine fish	Trichiurus lepturus Linnaeus, 1758	Largehead hairtail	4.4	6904	4	0	0	0	0	0	0	0	0	0	0	0	0	0	21	21	33	0	0	66	1247	309	285	136	10	37	75	90	77	435	273	399	258	308	458	315	322	465	420
Argentina	ARG	Capture	Characins nei	Leporinus	America, South - Inland waters	Freshwater fish	C30	Leporinus	3	198833	6948	7599	12496	11732	4685	6444	13266	12561	5709	6937	3982	4440	6160	7350	6734	6734	7000	8000	7500	7000	6500	6000	5500	4500	4000	1557	1000	1515	1737	3927	5258	3349	713	0	0	0	0	0	0
Argentina	ARG	Capture	Marine fishes nei	Marine fish	Atlantic, Southwest	Marine fish	Weighted mean	Marine fish	3.97886	87267	0	0	0	0	0	0	0	0	0	0	0	0	0	0	0	0	2323	2655	4442	10945	3972	5796	6217	3549	7213	7218	3765	3520	4360	6735	2929	2064	3428	2723	1219	253	159	245	170
Argentina	ARG	Capture	Mullets nei	Mullet	Atlantic, Southwest	Marine fish	C162	Mullet	2.16667	2417	11	8	17	13	4	30	12	16	14	11	13	69	6	9	3	3	8	3	8	18	10	8	7	11	5	11	8	33	194	99	81	27	46	37	47	20	93	470	304
Argentina	ARG	Capture	Narrownose smooth-hound	Narrownose smooth-hound	Atlantic, Southwest	Marine fish	Mustelus schmitti Springer, 1939	Narrownose smooth-hound	3.6	319402	4883	4816	5981	4549	5108	4680	5789	5344	5307	6099	7191	7173	13597	8096	7610	8547	10359	11332	11734	11057	10245	9956	11264	9786	7120	9613	7019	7899	7715	7744	9378	9142	10362	9028	7948	6538	5699	4378	3875
Argentina	ARG	Capture	Octopuses, etc. nei	Octopus	Atlantic, Southwest	Cephalopod	Cephalopod	Cephalopod	3	689	7	0	7	57	18	9	14	29	27	11	75	32	59	33	52	13	12	6	5	34	39	48	17	34	5	13	3	6	2	7	3	7	3	0	0	1	0	0	0
Argentina	ARG	Capture	Parona leatherjacket	Parona leatherjacket	Atlantic, Southwest	Marine fish	Parona signata (Jenyns, 1841)	Parona leatherjacket	3.4	39796	88	408	175	359	311	210	1013	417	266	477	852	522	1484	932	836	728	678	712	2296	1478	1925	1807	1744	1730	1483	933	868	1314	2489	1192	1446	1235	935	797	526	738	986	1121	705
Argentina	ARG	Capture	Patagonian blennie	Patagonian blennie	Atlantic, Southwest	Marine fish	Eleginops maclovinus (Cuvier, 1830)	Patagonian blennie	3.5	9045	54	275	118	44	21	30	124	68	25	247	227	86	21	27	29	82	333	282	625	66	148	57	1198	2028	1745	233	50	60	56	53	47	7	15	25	66	11	7	343	2
Argentina	ARG	Capture	Patagonian grenadier	Patagonian grenadier	Atlantic, Southwest	Marine fish	Macruronus magellanicus Lönnberg, 1907	Patagonian grenadier	3.9	2026553	0	0	1062	257	73	1150	881	665	534	1011	1452	782	6951	3033	3840	5289	9534	29174	17472	22796	46241	41705	96360	118356	123684	111836	98723	97773	116944	115270	124608	98782	110267	110717	82665	70903	59595	55973	58384
Argentina	ARG	Capture	Patagonian toothfish	Patagonian toothfish	Atlantic, Antarctic	Marine fish	Dissostichus eleginoides Smitt, 1898	Patagonian toothfish	4.5	917	0	0	0	0	0	0	0	0	0	0	0	0	0	0	0	0	0	0	0	816	101	0	0	0	0	0	0	0	0	0	0	0	0	0	0	0	0	0	0
Argentina	ARG	Capture	Patagonian toothfish	Patagonian toothfish	Atlantic, Southwest	Marine fish	Dissostichus eleginoides Smitt, 1898	Patagonian toothfish	4.5	154207	0	0	39	64	0	26	48	152	27	107	144	22	53	105	135	132	554	4703	12545	19180	14939	8783	9975	7722	7771	6410	8164	5652	2348	1219	1411	1873	2171	2434	3015	2989	3266	3464	3897
Argentina	ARG	Capture	Pati	Pati	America, South - Inland waters	Freshwater fish	Luciopimelodus pati (Valenciennes, 1835)	Pati	3.1	2167	0	0	0	0	0	0	0	0	0	0	0	0	0	0	0	0	0	0	0	0	0	0	0	0	0	0	0	0	0	0	0	0	0	226	315	241	357	94	94
Argentina	ARG	Capture	Picked dogfish	Picked dogfish	Atlantic, Southwest	Marine fish	Squalus acanthias Linnaeus, 1758	Picked dogfish	4.4	1513	0	0	0	0	0	0	0	0	0	0	0	0	0	0	0	0	0	0	0	0	0	0	0	0	0	0	0	0	0	0	113	119	148	232	268	187	237	31	57
Argentina	ARG	Capture	Pink cusk-eel	Pink cusk-eel	Atlantic, Southwest	Marine fish	Genypterus blacodes (Forster, 1801)	Pink cusk-eel	4.2	617393	3361	2948	5050	7343	6561	4346	8820	9291	3894	9208	14363	15276	17307	20798	34096	18124	24168	26003	21720	23265	22094	21930	25109	21649	15166	19633	17794	14601	17101	18605	20580	20609	17558	16694	16357	16276	10112	6695	5738
Argentina	ARG	Capture	Plownose chimaera	Plownose chimaera	Atlantic, Southwest	Marine fish	Callorhinchus callorynchus (Linnaeus, 1758)	Plownose chimaera	3.4	58565	895	1064	1093	1244	1687	1221	1882	1408	722	1262	782	684	921	779	850	646	488	715	1142	921	815	1365	1770	1979	1390	457	568	1712	1619	1873	1512	1688	2688	2782	2138	2323	1588	1299	918
Argentina	ARG	Capture	Prochilods nei	Prochilod	America, South - Inland waters	Freshwater fish	C196	Prochilod	2.2	417242	0	0	0	0	0	0	0	0	0	0	0	0	0	0	0	0	0	0	0	0	10000	12000	14000	16000	19000	13687	17096	24876	31879	29396	27522	15602	10084	14839	13999	15164	12148	11986	14181
Argentina	ARG	Capture	Rainbow trout	Rainbow trout	America, South - Inland waters	Freshwater fish	Oncorhynchus mykiss (Walbaum, 1792)	Rainbow trout	4.1	2057	0	0	0	0	0	0	0	0	250	150	210	145	100	100	150	100	400	186	261	3	2	0	0	0	0	0	0	0	0	0	0	0	0	0	0	0	0	0	0
Argentina	ARG	Capture	Rays, stingrays, mantas nei	Ray, stingray, manta	Atlantic, Southwest	Marine fish	C203	Ray and stingray and manta	3.4125	474924	3554	2924	3620	3098	3879	935	1087	1367	1290	2017	2814	3190	3232	3492	459	222	761	920	5955	7190	12478	12130	14855	12669	13289	17026	14722	17469	18170	22455	23618	28038	26958	19941	20326	20426	15168	15195	15739
Argentina	ARG	Capture	Red porgy	Red porgy	Atlantic, Southwest	Marine fish	Pagrus pagrus (Linnaeus, 1758)	Red porgy	3.9	193367	2924	7899	12941	9965	8768	15365	8612	6755	6562	6192	2494	3946	5728	5460	2768	2861	2673	1314	1252	1203	1590	1159	574	2371	1301	935	904	1822	2298	2802	4747	4302	6574	7102	5869	3645	2997	4204	3055
Argentina	ARG	Capture	Ridge scaled rattail	Ridge scaled rattail	Atlantic, Southwest	Marine fish	Macrourus carinatus (Günther, 1878)	Ridge scaled rattail	3.7	82013	0	0	0	0	0	0	0	0	0	0	0	318	61	94	36	36	32	5	61	664	793	1041	3292	2580	10503	3200	5329	8196	5067	1826	2356	2201	12542	5378	4332	3862	2026	564	844
Argentina	ARG	Capture	Rio skate	Rio skate	Atlantic, Southwest	Marine fish	Rioraja agassizii (Müller & Henle, 1841)	Rio skate	3.6	1146	0	0	0	0	0	0	0	0	0	0	0	0	0	0	0	0	0	0	0	0	0	0	0	0	0	0	0	0	0	0	0	0	0	237	417	221	108	89	24
Argentina	ARG	Capture	Rough scad	Rough scad	Atlantic, Southwest	Marine fish	Trachurus lathami Nichols, 1920	Rough scad	4	17035	1293	1600	2004	595	867	1405	676	379	338	418	81	157	722	666	232	316	227	207	215	196	587	290	247	470	67	117	127	103	110	181	243	293	265	282	161	309	82	210	143
Argentina	ARG	Capture	Silversides(=Sand smelts) nei	Sand smelt	Atlantic, Southwest	Marine fish	Odontesthes incisa (Jenyns, 1841)	Sand smelt	3.4	22025	1169	1188	739	1201	1034	1012	1000	660	561	753	717	485	466	949	454	403	809	571	489	411	63	82	48	618	15	363	206	129	38	32	255	396	525	379	564	374	282	568	489
Argentina	ARG	Capture	Clupeoids nei	Sardine, Pilchard	Atlantic, Southwest	Marine fish	C33	Sardine and Pilchard	3.23333	113	1	0	0	1	0	1	0	4	2	0	1	1	4	3	1	94	0	0	0	0	0	0	0	0	0	0	0	0	0	0	0	0	0	0	0	0	0	0	0
Argentina	ARG	Capture	Sea catfishes nei	Sea catfish	Atlantic, Southwest	Marine fish	C225	Sea catfish	3.75	962	0	0	0	0	0	0	0	0	0	0	0	0	0	0	0	0	3	3	22	16	6	13	18	5	5	20	27	19	13	42	71	61	56	63	78	53	46	81	63
Argentina	ARG	Capture	Various sharks nei	Shark	Atlantic, Southwest	Marine fish	C325	Shark	4.34615	78658	1051	814	1752	1055	580	1424	4019	1392	2838	5841	5325	4280	3216	4108	4459	3958	4007	2087	1759	2230	2251	1070	1220	1159	719	798	1101	998	684	1088	1337	917	989	820	936	842	894	763	1281
Argentina	ARG	Capture	Antarctic krill	Shrimp	Atlantic, Antarctic	Crustacean	Crustacean	Crustacean	2.5	6524	0	0	0	0	0	0	0	0	0	0	0	0	0	0	0	0	0	0	0	0	0	0	0	6524	0	0	0	0	0	0	0	0	0	0	0	0	0	0	0
Argentina	ARG	Capture	Argentine red shrimp	Shrimp	Atlantic, Southwest	Crustacean	Crustacean	Crustacean	2.5	2188280	151	125	41	4	728	2616	7667	18975	22994	9835	6768	1083	17800	11680	9852	8218	24496	19271	16670	6705	9874	6482	23333	15988	37150	78843	51410	52896	27127	7473	44405	47619	47406	53731	72085	82922	79927	101105	127250
Argentina	ARG	Capture	Argentine stiletto shrimp	Shrimp	Atlantic, Southwest	Crustacean	Crustacean	Crustacean	2.5	8367	255	521	200	48	74	114	147	314	124	429	211	295	338	177	197	149	382	200	216	250	263	178	146	37	38	283	298	414	166	181	121	104	367	221	104	224	57	44	73
Argentina	ARG	Capture	Skipjack tuna	Skipjack tuna	Atlantic, Southwest	Marine fish	Katsuwonus pelamis (Linnaeus, 1758)	Skipjack tuna	4.4	1896	0	33	4	0	17	1	137	243	505	101	138	0	7	111	106	272	123	50	1	0	1	0	0	0	1	0	0	0	30	0	0	0	0	3	12	0	0	0	0
Argentina	ARG	Capture	Smallnose fanskate	Smallnose fanskate	Atlantic, Southwest	Marine fish	Sympterygia bonapartii Müller & Henle, 1841	Smallnose fanskate	3.9	1183	0	0	0	0	0	0	0	0	0	0	0	0	0	0	0	0	0	0	0	0	0	0	0	0	0	0	0	0	0	0	0	0	0	187	424	84	96	54	85
Argentina	ARG	Capture	Sorubims nei	Sorubim	America, South - Inland waters	Freshwater fish	C260	Sorubim	4.46667	141	0	0	0	0	0	0	0	0	0	0	0	0	0	0	0	0	0	0	0	0	0	0	0	0	0	0	0	0	0	0	0	0	0	29	105	7	0	0	0
Argentina	ARG	Capture	South American silver porgy	South American silver croaker	Atlantic, Southwest	Marine fish	Plagioscion squamosissimus (Heckel, 1840)	South American silver croaker	4.4	428	0	0	0	0	0	0	0	0	0	0	0	0	0	0	0	0	3	7	6	8	39	84	15	5	2	2	1	2	7	7	18	18	21	9	17	60	30	20	13
Argentina	ARG	Capture	Southern blue whiting	Southern blue whiting	Atlantic, Southwest	Marine fish	Micromesistius australis Norman, 1937	Southern blue whiting	3.3	1297958	0	0	2598	2121	2351	4538	7016	707	352	2304	2398	189	1307	5000	32836	44143	90095	128525	91048	104208	84624	79937	71643	55097	61313	54311	42453	44584	50216	36663	31292	18979	19841	21677	11636	3518	8379	7887	9050
Argentina	ARG	Capture	Southern hake	Southern hake	Atlantic, Southwest	Marine fish	Merluccius australis (Hutton, 1872)	Southern hake	4.5	118341	0	0	0	912	339	782	1182	1091	6	1394	569	1364	2326	3139	4894	1940	5368	4782	1743	3899	4063	3037	3126	3471	7035	4742	5301	6693	5923	3865	3418	2871	3172	3212	2755	2383	3143	2633	3376
Argentina	ARG	Capture	Southwest Atlantic butterfish	Southwest Atlantic butterfish	Atlantic, Southwest	Marine fish	Stromateus brasiliensis Fowler, 1906	Southwest Atlantic butterfish	3.4	20915	0	0	0	0	0	0	0	0	0	0	0	0	0	0	0	0	0	0	0	0	0	0	0	0	0	0	0	0	0	0	1035	1162	1171	2480	2489	2596	1568	2178	1346
Argentina	ARG	Capture	Spotback skate	Spotback skate	Atlantic, Southwest	Marine fish	Atlantoraja castelnaui (Miranda Ribeiro, 1907)	Spotback skate	4.5	128	0	0	0	0	0	0	0	0	0	0	0	0	0	0	0	0	0	0	0	0	0	0	0	0	0	0	0	0	0	0	0	0	0	25	60	4	4	5	8
Argentina	ARG	Capture	Argentine shortfin squid	Squid	Atlantic, Southwest	Cephalopod	Cephalopod	Cephalopod	3	5474430	7493	2168	59001	83579	9111	10622	38885	28687	28969	21541	12455	29610	20777	23106	27603	46313	78014	195512	198833	199744	294252	411719	291240	343437	279046	230272	177314	140938	76485	146097	292070	233062	255531	72604	85989	76598	94984	191741	168727
Argentina	ARG	Capture	Patagonian squid	Squid	Atlantic, Southwest	Cephalopod	Cephalopod	Cephalopod	3	15595	128	255	238	349	186	201	262	243	104	239	250	205	109	157	123	49	2080	971	1076	921	184	1999	802	209	268	251	64	325	221	608	280	238	234	255	374	261	400	116	118
Argentina	ARG	Capture	Sevenstar flying squid	Squid	Atlantic, Southwest	Cephalopod	Cephalopod	Cephalopod	3	2327	0	0	0	0	0	0	0	0	0	0	0	0	0	0	0	0	0	0	0	599	0	310	0	643	653	113	0	1	1	3	0	0	0	4	0	0	0	0	0
Argentina	ARG	Capture	Stripped weakfish	Striped weakfish	Atlantic, Southwest	Marine fish	Cynoscion striatus (Cuvier, 1829)	Striped weakfish	3.9	509942	4034	2064	3601	5897	9010	8272	15025	7132	3463	8132	12513	10347	17684	10082	9488	5319	10173	6407	15712	19218	18971	24132	17093	11583	9433	11844	11412	6597	15603	10133	15312	15670	15158	13255	12772	13710	15214	16388	14399
Argentina	ARG	Capture	Swordfish	Swordfish	Atlantic, Southwest	Marine fish	Xiphias gladius Linnaeus, 1758	Swordfish	4.5	1863	111	132	4	0	0	0	20	0	0	361	31	351	198	175	230	88	88	14	24	0	0	0	0	0	0	5	10	8	0	0	0	0	3	0	1	0	4	4	0
Argentina	ARG	Capture	Tadpole codling	Tadpole codling	Atlantic, Southwest	Marine fish	Salilota australis (Günther, 1878)	Tadpole codling	4.4	105560	0	0	0	0	0	0	0	0	0	0	0	0	0	0	0	0	1212	514	102	2241	2077	2610	6819	7203	9431	4449	3129	5689	4664	3186	2952	4610	8010	6963	6808	5191	3922	3815	2780
Argentina	ARG	Capture	Tope shark	Tope shark	Atlantic, Southwest	Marine fish	Galeorhinus galeus (Linnaeus, 1758)	Tope shark	4.3	3258	199	0	32	20	7	29	31	6	5	48	1	15	175	38	67	88	58	230	75	104	93	103	92	89	109	50	29	58	79	138	143	128	91	170	128	158	131	47	54
Argentina	ARG	Capture	Trahira	Trahira	America, South - Inland waters	Freshwater fish	Hoplias malabaricus (Bloch, 1794)	Trahira	4.5	7053	0	0	0	0	0	0	0	0	0	0	0	0	0	0	0	0	0	0	0	0	0	0	0	0	0	0	0	0	0	0	0	0	0	123	308	1277	689	111	138
Argentina	ARG	Capture	Tuna-like fishes nei	Tuna, bonito	Atlantic, Southwest	Marine fish	C311	Tuna and bonito	4.44545	327	0	0	0	0	17	0	36	9	16	11	2	0	0	1	1	0	1	2	0	0	0	0	0	0	0	0	0	0	83	3	16	0	0	1	121	0	3	0	0
Argentina	ARG	Capture	Whitemouth croaker	Whitemouth croaker	Atlantic, Southwest	Marine fish	Micropogonias furnieri (Desmarest, 1823)	Whitemouth croaker	3.1	732433	5176	3955	4544	4449	6518	13657	16760	18160	5311	4065	11006	8893	11346	6025	6398	4663	10955	12743	19052	29989	23514	26108	9439	6762	5296	6368	5414	11492	10905	21945	26723	25654	22417	26647	15843	24679	37868	45637	38591
Argentina	ARG	Capture	Wreckfish	Wreckfish	Atlantic, Southwest	Marine fish	Polyprion americanus (Bloch & Schneider, 1801)	Wreckfish	4.1	2269	0	0	0	0	0	0	0	0	0	0	0	0	0	0	0	0	120	155	91	227	226	122	75	221	129	109	69	61	47	39	116	52	64	76	44	34	30	25	25
Argentina	ARG	Capture	Yellowfin tuna	Yellowfin tuna	Atlantic, Southwest	Marine fish	Thunnus albacares (Bonnaterre, 1788)	Yellowfin tuna	4.4	366	57	43	4	0	0	8	7	0	0	44	23	18	66	33	23	34	1	0	0	0	0	0	0	0	0	0	0	0	0	0	0	0	0	5	0	0	0	0	0
Argentina	ARG	Capture	Yellownose skate	Yellownose skate	Atlantic, Southwest	Marine fish	Dipturus chilensis (Guichenot, 1848)	Yellownose skate	4.5	7297	0	0	0	0	0	0	0	0	0	0	0	0	0	0	0	0	0	0	0	0	0	0	0	0	0	0	0	0	0	0	0	0	0	1331	1459	714	817	628	432
Argentina	ARG	Capture	Yellowtail amberjack	Yellowtail amberjack	Atlantic, Southwest	Marine fish	Seriola lalandi Valenciennes, 1833	Yellowtail amberjack	4.2	2598	316	95	129	52	199	200	195	103	143	335	147	85	54	142	49	49	60	24	13	9	16	17	7	9	10	33	8	3	2	4	13	6	6	16	9	2	3	9	8
Argentina	ARG	Capture	Demersal percomorphs nei	Demersal percomorph	Atlantic, Southwest	Marine fish	Demersal percomorph	Demersal percomorph	4	42518	3135	5710	10205	5295	1563	2476	600	1373	1416	1208	918	672	1561	2069	2484	1833	0	0	0	0	0	0	0	0	0	0	0	0	0	0	0	0	0	0	0	0	0	0	0
Argentina	ARG	Aquaculture	[Brycon orbignyanus]	/	America, South - Inland waters	Freshwater fish	Brycon orbignyanus (Valenciennes, 1850)	/	2.7	202.75	0	0	0	0	0	0	0	0	0	0	0	0	0	0	0	0	0	0	0	0	0	0	0	0	0	0	0	0	0	0	0	0	0	0	0	0	0	40.95	3.53
Argentina	ARG	Aquaculture	Cyprinids nei	Carp	America, South - Inland waters	Freshwater fish	A13	Carp	2.73333	1293	0	0	0	0	0	0	0	0	0	0	0	0	0	0	0	0	0	0	0	0	0	0	0	0	0	0	0	0	0	0	76	226	108	102.5	89.68	114.48	51.82	75.55	99.83
Argentina	ARG	Aquaculture	Dorado	Dorado	America, South - Inland waters	Freshwater fish	Salminus brasiliensis (Cuvier, 1816)	Dorado	3.8	113.31	0	0	0	0	0	0	0	0	0	0	0	0	0	0	0	0	0	0	0	0	0	0	0	0	0	0	0	0	0	0	0	0	0	0	1.04	0.47	0.78	19.27	19.52
Argentina	ARG	Aquaculture	Grass carp(=White amur)	Grass carp	America, South - Inland waters	Freshwater fish	Ctenopharyngodon idella (Valenciennes, 1844)	Grass carp	2	605.28	0	0	0	0	0	0	0	0	0	0	0	0	0	0	0	0	0	0	0	0	0	0	0	0	0	0	1	20	2	25	25	25	0	0	0	46	51.58	66.66	71
Argentina	ARG	Aquaculture	Pacu	Pacu	America, South - Inland waters	Freshwater fish	Lithodoras dorsalis (Valenciennes, 1840)	Pacu	2	21325.7	0	0	0	0	0	0	0	0	0	0	0	0	0	0	0	0	0	0	0	0	0	0	0	390	700	300	450	300	325	500	500	656	725	625	626	1227	1345.3	2017.45	2119.2
Argentina	ARG	Aquaculture	Rainbow trout	Rainbow trout	America, South - Inland waters	Freshwater fish	Oncorhynchus mykiss (Walbaum, 1792)	Rainbow trout	4.1	37213.5	49	57	67	78	90	105	123	143	150	250	250	350	350	300	300	350	400	650	700	1412	1242	1242	1000	781	952	950	900	1231	1328	1300	1760	1863	1600	1601	1650.7	1364.7	1255.4	1253.58	1424.3
Argentina	ARG	Aquaculture	Red claw crayfish	Crayfish	America, South - Inland waters	Crustacean	Crustacean	Crustacean	2.5	174.36	0	0	0	0	0	0	0	0	0	0	0	0	0	0	0	0	0	0	0	0	10	10	20	31	32	30	18	1	1	4	4	7	6	0.36	0	0	0	0	0
Argentina	ARG	Aquaculture	Siberian sturgeon	Siberian sturgeon	America, South - Inland waters	Freshwater fish	Acipenser baerii Brandt, 1869	Siberian sturgeon	3.3	147.54	0	0	0	0	0	0	0	0	0	0	0	0	0	0	0	0	0	0	0	0	0	0	0	0	0	0	0	0	0	0	0	0	0	0	0	1.8	6	47.5	40.34
Argentina	ARG	Aquaculture	Sorubims nei	Spotted sorubim	America, South - Inland waters	Freshwater fish	Pseudoplatystoma corruscans (Spix & Agassiz, 1829)	Spotted sorubim	4.5	739.41	0	0	0	0	0	0	0	0	0	0	0	0	0	0	0	0	0	0	0	0	0	0	0	0	0	0	0	0	0	0	0	0	0	0	22.73	1.06	54.18	173.66	95.19
Argentina	ARG	Aquaculture	Tilapias nei	Tilapia	America, South - Inland waters	Freshwater fish	A38	Tilapia	2.15714	544.75	0	0	0	0	0	0	0	0	0	0	0	0	0	0	0	0	0	0	0	0	10	10	0	0	10	0	3	5	4	12	7	15	13	12	18.53	40.12	45.19	34.55	72.93
Armenia	ARM	Capture	Cyprinids nei	Carp	Asia - Inland waters	Freshwater fish	C349	Carp	2.39091	2269.85	0	0	0	0	0	0	0	0	0	0	0	0	321	501	370	66	231	312	46	42	33	7	37	21	19	15	9	10	6	7	10	12	14	15	14	20	25	28	20
Armenia	ARM	Capture	Common carp	Common carp	Asia - Inland waters	Freshwater fish	Cyprinus carpio Linnaeus, 1758	Common carp	3.1	1157.54	0	0	0	0	0	0	0	0	0	0	0	0	0	0	0	0	9	1	0	1	91	32	14	12	9	7	11	143	26	30	42	49	56	58	58	75	77	86	70
Armenia	ARM	Capture	Danube crayfish	Crayfish	Asia - Inland waters	Crustacean	Crustacean	Crustacean	2.5	22192.7	0	0	0	0	0	0	0	0	0	0	0	0	0	0	0	0	0	0	0	0	0	0	0	0	0	0	0	0	0	0	0	717	258	266	266	340	360	3550	4350
Armenia	ARM	Capture	Crucian carp	Crucian carp	Asia - Inland waters	Freshwater fish	Carassius carassius (Linnaeus, 1758)	Crucian carp	3.1	1961.39	0	0	0	0	0	0	0	0	0	0	0	0	53	73	87	68	65	25	10	2	28	23	42	26	38	32	54	63	40	45	63	73	83	85	85	110	130	140	110
Armenia	ARM	Capture	Freshwater fishes nei	Freshwater fish	Asia - Inland waters	Freshwater fish	Weighted mean	Freshwater fish	3.13196	1328.54	0	0	0	0	0	0	0	0	0	0	0	0	0	139	0	30	0	0	0	0	0	0	0	0	0	0	22	81	49	56	80	73	69	71	70	90	92	100	80
Armenia	ARM	Capture	Trouts nei	Trout	Asia - Inland waters	Freshwater fish	C305	Trout	3.775	2270.32	0	0	0	0	0	0	0	0	0	0	0	0	0	0	0	0	50	5	7	0	0	6	0	163	186	180	167	151	62	72	100	91	78	80	80	105	120	132	115
Armenia	ARM	Capture	Whitefishes nei	Whitefish	Asia - Inland waters	Freshwater fish	C319	Whitefish	3.15	17842.7	0	0	0	0	0	0	0	0	0	0	0	0	2045	2025	2241	1769	1530	1507	970	776	428	512	605	922	881	632	202	121	35	40	55	50	43	44	44	55	57	63	50
Armenia	ARM	Aquaculture	Common carp	Common carp	Asia - Inland waters	Freshwater fish	Cyprinus carpio Linnaeus, 1758	Common carp	3.1	37234	0	0	0	0	0	0	0	0	0	0	0	0	3616	3639	3980	1972	1940	1551	950	539	301	290	101	340	372	511	305	256	216	200	300	430	750	650	680	950	1670	1770	1850
Armenia	ARM	Aquaculture	Crucian carp	Crucian carp	Asia - Inland waters	Freshwater fish	Carassius carassius (Linnaeus, 1758)	Crucian carp	3.1	1503	0	0	0	0	0	0	0	0	0	0	0	0	0	0	0	0	5	37	75	48	3	16	5	45	31	43	41	47	45	40	53	50	50	50	50	50	14	90	110
Armenia	ARM	Aquaculture	Cyprinids nei	Carp	Asia - Inland waters	Freshwater fish	A13	Carp	2.73333	3360	0	0	0	0	0	0	0	0	0	0	0	0	0	0	0	0	0	0	0	0	0	0	0	0	0	0	0	0	0	0	0	200	200	200	200	200	200	400	450
Armenia	ARM	Aquaculture	Danube crayfish	Crayfish	Asia - Inland waters	Crustacean	Crustacean	Crustacean	2.5	292	0	0	0	0	0	0	0	0	0	0	0	0	0	0	0	0	0	0	0	0	0	0	0	0	0	0	0	20	3	3	3	12	21	20	20	20	30	30	30
Armenia	ARM	Aquaculture	Freshwater fishes nei	Freshwater fish	Asia - Inland waters	Freshwater fish	Weighted mean	Freshwater fish	3.45859	2978	0	0	0	0	0	0	0	0	0	0	0	0	0	0	0	0	10	22	90	75	4	20	4	0	0	0	0	0	0	0	0	193	253	160	100	150	200	300	300
Armenia	ARM	Aquaculture	Silver carp	Silver carp	Asia - Inland waters	Freshwater fish	Hypophthalmichthys molitrix (Valenciennes, 1844)	Silver carp	2	9604	0	0	0	0	0	0	0	0	0	0	0	0	741	563	664	271	270	290	220	108	46	39	19	59	51	312	327	382	229	200	300	460	300	300	300	300	300	500	543
Armenia	ARM	Aquaculture	Sturgeons nei	Sturgeon	Asia - Inland waters	Freshwater fish	A37	Sturgeon	3.48182	29249	0	0	0	0	0	0	0	0	0	0	0	0	0	0	0	0	0	0	0	0	0	0	0	0	0	0	0	0	0	0	0	0	200	460	550	830	1636	2170	2931
Armenia	ARM	Aquaculture	Trouts nei	Trout	Asia - Inland waters	Freshwater fish	A42	Trout	3.78	92269	0	0	0	0	0	0	0	0	0	0	0	0	241	402	413	394	340	350	235	350	296	305	308	445	439	465	347	359	320	296	400	2305	3326	3400	3100	3800	4800	6440	7711
Australia	AUS	Capture	Albacore	Albacore	Indian Ocean, Eastern	Marine fish	Thunnus alalunga (Bonnaterre, 1788)	Albacore	4.3	1580.06	0	0	0	0	3	0	404	13	28	4	0	1	0	30	0	97	49	103	127	27	4	23	26	31	28	137	72	112	32	12	8	11	10	20	18.66	7.46	14.89	14.74	16.64
Australia	AUS	Capture	Albacore	Albacore	Pacific, Southwest	Marine fish	Thunnus alalunga (Bonnaterre, 1788)	Albacore	4.3	13852.2	100	100	100	100	100	5	6	7	8	9	10	140	119	93	284	213	204	226	351	401	468	317	418	225	212	222	332	248	330	353	217	94	190	224	190	106	783.66	739.19	796.62
Australia	AUS	Capture	Albacore	Albacore	Pacific, Western Central	Marine fish	Thunnus alalunga (Bonnaterre, 1788)	Albacore	4.3	15739	0	0	0	0	0	0	0	0	0	0	0	0	0	0	0	0	0	0	0	0	0	0	0	179	147	173	345	246	220	274	1081	2720	1194	1297	745	653	709	773	737
Australia	AUS	Capture	Alfonsinos nei	Alfonsino	Indian Ocean, Eastern	Marine fish	C5	Alfonsino	4.2	165.77	0	0	0	0	0	0	0	0	0	0	0	0	0	0	0	0	0	0	0	0	0	0	0	0	0	0	0	0	0	0	0	0	0	54	16	13	7	5	10
Australia	AUS	Capture	Alfonsinos nei	Alfonsino	Pacific, Southwest	Marine fish	C5	Alfonsino	4.2	728.79	0	0	0	0	0	0	0	0	0	0	0	0	0	0	0	0	0	0	0	0	0	0	0	0	0	0	3	2	1	81	209	86	0	0	14	0	201	105	15
Australia	AUS	Capture	Amberjacks nei	Amberjack	Indian Ocean, Eastern	Marine fish	C6	Amberjack	4.35	1849.26	79	68	41	57	40	61	78	79	74	78	110	140	147	123	156	150	5	7	102	105	100	10	10	1	2	2	1	3	6	0	0	0	2	1	0	0	0	0	0
Australia	AUS	Capture	Anchovies, etc. nei	Anchovy	Indian Ocean, Eastern	Marine fish	C8	Anchovy	3.3	4798.65	0	0	0	0	0	0	4	6	191	201	283	361	379	317	403	400	85	178	735	470	775	0	0	0	0	0	0	0	0	0	0	0	0	0	0	0	0	0	1
Australia	AUS	Capture	Anchovies, etc. nei	Anchovy	Pacific, Southwest	Marine fish	C8	Anchovy	3.3	1515	0	0	0	0	0	0	41	54	84	89	125	159	167	140	178	170	12	12	13	13	12	19	19	2	39	22	82	9	2	50	2	0	0	0	0	0	0	0	0
Australia	AUS	Capture	Antarctic toothfish	Antarctic toothfish	Indian Ocean, Antarctic	Marine fish	Dissostichus mawsoni Norman, 1937	Antarctic toothfish	3.9	369.45	0	0	0	0	0	0	0	0	0	0	0	0	0	0	0	0	0	0	0	0	0	0	0	0	0	0	0	117	26	0	0	0	3	0	0.01	0.02	0	0.09	0.31
Australia	AUS	Capture	Antarctic toothfish	Antarctic toothfish	Pacific, Antarctic	Marine fish	Dissostichus mawsoni Norman, 1937	Antarctic toothfish	3.9	773.01	0	0	0	0	0	0	0	0	0	0	0	0	0	0	0	0	0	0	0	0	0	0	0	0	0	0	0	0	0	0	0	0	0	0	0	0	0	0	39.44
Australia	AUS	Capture	Angelsharks, sand devils nei	Australian angelshark	Indian Ocean, Eastern	Marine fish	Squatina australis Regan, 1906	Australian angelshark	4	3905	0	0	0	0	0	0	0	0	0	0	0	0	0	0	0	0	0	0	47	98	102	129	120	102	98	71	118	184	246	319	336	278	221	141	147	158	184	240	174
Australia	AUS	Capture	Australian salmon	Australian salmon	Indian Ocean, Eastern	Marine fish	Arripis trutta (Forster, 1801)	Australian salmon	4.1	112330	2281	3188	2758	2209	2443	2335	2626	3782	4478	4719	4000	3000	2000	1851	2115	2627	1699	2946	2720	4840	3507	3457	3623	3354	4232	3932	4232	3170	3196	2292	3166	2334	1488	1859	1560	745	1382	1079	871
Australia	AUS	Capture	Australian salmon	Australian salmon	Pacific, Southwest	Marine fish	Arripis trutta (Forster, 1801)	Australian salmon	4.1	34793	850	613	467	182	263	327	307	372	393	414	583	744	781	542	436	339	787	786	489	1086	1162	1316	296	172	449	815	810	1347	2132	1135	659	1068	1449	1531	1384	741	910	1342	1058
Australia	AUS	Capture	Barramundi(=Giant seaperch)	Barramundi	Indian Ocean, Eastern	Marine fish	Lates calcarifer (Bloch, 1790)	Barramundi	3.8	1423	18	25	37	35	25	120	28	63	64	67	94	120	126	105	134	130	60	45	43	38	46	0	0	0	0	0	0	0	0	0	0	0	0	0	0	0	0	0	0
Australia	AUS	Capture	Barramundi(=Giant seaperch)	Barramundi	Pacific, Western Central	Marine fish	Lates calcarifer (Bloch, 1790)	Barramundi	3.8	57848.8	1101	1543	1649	1457	917	1007	881	774	633	667	940	1200	1259	1190	1283	1242	928	966	984	1002	1226	1178	1306	1690	1747	1953	1925	1527	1614	1440	1576	1466	1622	1745	1658	2071	2261	1596	1236
Australia	AUS	Capture	Bigeye tuna	Bigeye tuna	Indian Ocean, Eastern	Marine fish	Thunnus obesus (Lowe, 1839)	Bigeye tuna	4.5	4211.34	0	0	0	0	0	0	7	28	1	2	3	14	0	19	0	3	125	475	146	84	25	57	187	476	437	386	419	206	91	31	59	69	45	62	65.27	50.05	167.45	90.7	75.37
Australia	AUS	Capture	Bigeye tuna	Bigeye tuna	Pacific, Southwest	Marine fish	Thunnus obesus (Lowe, 1839)	Bigeye tuna	4.5	11090	0	0	0	0	0	0	0	0	0	0	2	65	43	19	17	26	37	40	120	155	293	563	1024	257	355	367	450	358	381	343	189	57	308	154	668	425	493	553	478
Australia	AUS	Capture	Bigeye tuna	Bigeye tuna	Pacific, Western Central	Marine fish	Thunnus obesus (Lowe, 1839)	Bigeye tuna	4.5	12466	0	0	0	0	0	0	0	0	0	0	0	0	0	0	0	0	0	0	0	0	0	419	845	646	317	628	568	577	408	515	326	586	944	559	458	399	561	495	509
Australia	AUS	Capture	Scorpionfishes, redfishes nei	Bight redfish	Indian Ocean, Eastern	Marine fish	Centroberyx gerrardi (Günther, 1887)	Bight redfish	4.1	203	0	0	0	0	0	0	0	0	0	0	0	0	0	0	0	0	0	0	0	0	0	0	0	0	7	8	20	141	0	10	7	5	1	0	2	1	1	0	0
Australia	AUS	Capture	Black marlin	Black marlin	Pacific, Western Central	Marine fish	Istiompax indica (Cuvier, 1832)	Black marlin	4.5	894	0	0	0	0	0	0	0	0	0	0	0	17	13	1	15	17	9	1	3	2	5	0	1	0	0	46	72	67	37	60	45	26	16	16	15	13	23	23	52
Australia	AUS	Capture	[Hemiramphus spp]	Black-barred halfbeak	Indian Ocean, Eastern	Marine fish	Hemiramphus far (Forsskål, 1775)	Black-barred halfbeak	2.9	500	0	0	0	0	0	0	0	0	0	0	0	0	0	0	0	0	0	0	0	0	0	0	0	0	0	0	0	0	0	0	0	0	0	0	0	0	0	0	0
Australia	AUS	Capture	Blue grenadier	Blue grenadier	Indian Ocean, Eastern	Marine fish	Macruronus novaezelandiae (Hector, 1871)	Blue grenadier	4.5	127257	0	0	0	0	0	0	0	0	0	0	0	0	0	2235	1372	3347	3526	3039	3048	3239	2680	2851	4752	6209	8964	7313	9014	8760	8773	6562	4313	2237	3458	3979	3471	4030	4080	4019	4002
Australia	AUS	Capture	Blue grenadier	Blue grenadier	Pacific, Southwest	Marine fish	Macruronus novaezelandiae (Hector, 1871)	Blue grenadier	4.5	7191	0	0	0	0	0	0	0	0	0	0	0	0	0	0	0	0	0	0	0	0	0	0	0	0	547	267	165	113	87	102	155	1630	108	1833	51	1680	90	82	108
Australia	AUS	Capture	Blue marlin	Blue marlin	Pacific, Western Central	Marine fish	Makaira nigricans Lacepède, 1802	Blue marlin	4.5	1015	0	0	0	0	0	0	0	0	0	0	0	51	36	0	19	2	2	0	4	4	9	0	0	0	0	72	90	107	63	73	43	28	19	19	13	9	14	14	39
Australia	AUS	Capture	Bluefin gurnard	Bluefin gurnard	Indian Ocean, Eastern	Marine fish	Chelidonichthys kumu (Cuvier, 1829)	Bluefin gurnard	3.7	3950.18	1	0	0	53	59	41	27	18	41	43	61	77	81	68	86	80	0	1	1	1	0	1	1	0	117	163	143	76	162	145	150	188	203	168	166	160	171	160	153
Australia	AUS	Capture	Bluefin gurnard	Bluefin gurnard	Pacific, Southwest	Marine fish	Chelidonichthys kumu (Cuvier, 1829)	Bluefin gurnard	3.7	5547	135	147	38	80	112	127	128	142	119	125	176	225	236	197	251	250	342	363	147	123	46	349	371	0	295	277	233	37	58	60	48	33	34	44	30	25	33	27	39
Australia	AUS	Capture	Bluefish	Bluefish	Indian Ocean, Eastern	Marine fish	Pomatomus saltatrix (Linnaeus, 1766)	Bluefish	4.5	1604.03	70	37	29	80	93	103	97	74	49	52	73	93	98	82	104	100	48	45	49	54	56	0	0	0	0	0	0	0	62	40	15	0	0	0	0	0	0	0	0
Australia	AUS	Capture	Bluefish	Bluefish	Pacific, Southwest	Marine fish	Pomatomus saltatrix (Linnaeus, 1766)	Bluefish	4.5	4246	175	141	120	96	133	145	136	63	89	94	132	168	176	1000	187	180	100	98	96	96	101	64	64	46	70	114	73	55	61	54	119	0	0	0	0	0	0	0	0
Australia	AUS	Capture	Bluefish	Bluefish	Pacific, Western Central	Marine fish	Pomatomus saltatrix (Linnaeus, 1766)	Bluefish	4.5	4162.6	178	202	183	247	176	233	0	0	0	0	0	0	0	0	0	0	121	156	98	181	103	179	128	204	139	267	224	111	127	150	117	82	0	0	0	109	55	58	43
Australia	AUS	Capture	Bluenose warehou	Bluenose warehou	Indian Ocean, Eastern	Marine fish	Hyperoglyphe antarctica (Carmichael, 1819)	Bluenose warehou	4	3625.27	0	0	0	0	0	0	0	0	0	0	0	0	0	0	0	0	0	0	0	0	0	0	0	0	0	0	0	0	0	0	0	0	0	0	434	427	357	306	403
Australia	AUS	Capture	Bluenose warehou	Bluenose warehou	Pacific, Southwest	Marine fish	Hyperoglyphe antarctica (Carmichael, 1819)	Bluenose warehou	4	191.3	0	0	0	0	0	0	0	0	0	0	0	0	0	0	0	0	0	0	0	0	0	6	26	22	6	21	27	30	2	4	8	16	3	0	0	0	4.05	11.97	1.88
Australia	AUS	Capture	Broad-barred king mackerel	Broad-barred king mackerel	Pacific, Western Central	Marine fish	Scomberomorus semifasciatus (Macleay, 1883)	Broad-barred king mackerel	4.5	9425	107	144	59	29	15	24	0	0	0	0	0	0	0	0	0	0	386	248	398	339	495	0	0	0	0	0	0	0	0	0	0	0	0	967	856	1057	971	981	719
Australia	AUS	Capture	Common dolphinfish	Common dolphinfish	Pacific, Southwest	Marine fish	Coryphaena hippurus Linnaeus, 1758	Common dolphinfish	4.4	633	0	0	0	0	0	0	0	0	0	0	0	0	0	0	0	0	0	0	0	0	0	0	0	0	0	0	0	0	0	0	0	0	0	0	198	346	89	0	0
Australia	AUS	Capture	Common warehou	Common warehou	Indian Ocean, Eastern	Marine fish	Seriolella brama (Günther, 1860)	Common warehou	3.7	2163.13	0	0	0	0	0	0	0	0	0	0	0	0	0	0	0	0	0	0	0	0	0	0	0	0	0	0	0	0	281	268	398	291	204	173	102	120	106	49	46
Australia	AUS	Capture	Blue swimming crab	Crab	Indian Ocean, Eastern	Crustacean	Crustacean	Crustacean	2.5	25978	130	175	141	125	132	108	89	158	278	293	413	528	554	327	364	348	270	308	644	607	522	740	865	717	810	1007	1027	1255	1211	1305	1146	1230	1156	658	592	638	664	569	628
Australia	AUS	Capture	Blue swimming crab	Crab	Pacific, Southwest	Crustacean	Crustacean	Crustacean	2.5	12602	148	177	225	226	327	310	344	276	206	217	306	391	410	520	421	498	686	627	662	788	800	761	745	628	377	318	272	396	198	160	182	0	0	0	0	0	0	0	0
Australia	AUS	Capture	Blue swimming crab	Crab	Pacific, Western Central	Crustacean	Crustacean	Crustacean	2.5	89073.2	395	473	492	440	444	558	761	638	530	559	788	1006	1056	1349	1567	1666	1802	2573	4047	4590	4816	4507	4390	3732	4751	5482	4935	4372	4744	4063	3668	3560	3664	3222	0	422	347	485	405
Australia	AUS	Capture	Australian crayfish	Crayfish	Oceania - Inland waters	Crustacean	Crustacean	Crustacean	2.5	959	131	82	38	20	62	67	162	70	17	15	11	7	0	0	0	0	1	0	0	0	0	0	0	66	24	23	51	35	36	1	1	0	0	0	0	24	15	0	0
Australia	AUS	Capture	Marine crustaceans nei	Crustacean	Indian Ocean, Eastern	Crustacean	Crustacean	Crustacean	2.5	25432	0	0	0	0	0	0	0	34	0	0	0	0	0	12	16	16	115	87	277	261	1017	1351	1467	858	905	1062	1062	1063	950	965	840	813	834	1256	1498	1449	742	639	907
Australia	AUS	Capture	Marine crustaceans nei	Crustacean	Pacific, Southwest	Crustacean	Crustacean	Crustacean	2.5	11510.5	0	0	0	0	0	0	0	0	0	0	0	0	0	106	126	227	169	167	366	521	156	157	92	64	307	295	260	299	535	480	491	473	381	292	441	472	462	574	683
Australia	AUS	Capture	Marine crustaceans nei	Crustacean	Pacific, Western Central	Crustacean	Crustacean	Crustacean	2.5	46643.4	0	0	0	0	0	0	0	0	0	0	0	0	0	277	557	583	1	0	0	0	179	3966	3769	964	895	614	567	78	11	633	681	561	468	514	2979	3519	3550	3306	3242
Australia	AUS	Capture	Eaton's skate	Eaton's skate	Indian Ocean, Antarctic	Marine fish	Bathyraja eatonii (Günther, 1876)	Eaton's skate	4	235.15	0	0	0	0	0	0	0	0	0	0	0	0	0	0	0	0	0	0	0	0	0	0	0	0	0	0	0	24	8	6	0	7	8	6	13.18	3.72	11.8	15.98	5.84
Australia	AUS	Capture	Filefishes, leatherjackets nei	Filefish	Indian Ocean, Eastern	Marine fish	C60	Filefish	3.44	12181.2	50	37	134	32	39	45	63	61	98	103	145	185	194	162	206	200	294	160	68	62	158	122	115	3	442	432	534	456	905	960	731	475	342	617	814	621	667	236	159
Australia	AUS	Capture	Filefishes, leatherjackets nei	Filefish	Pacific, Southwest	Marine fish	C60	Filefish	3.44	13469	358	326	231	194	334	409	436	470	390	411	579	739	775	648	824	500	164	163	195	211	70	97	69	0	220	232	429	548	719	353	291	231	347	335	371	295	267	111	79
Australia	AUS	Capture	Flatfishes nei	Flatfish	Pacific, Southwest	Marine fish	C62	Flatfish	3.695	189	1	3	4	0	4	1	0	3	4	4	6	7	7	6	8	8	5	5	3	3	5	6	6	12	15	14	8	9	9	14	9	0	0	0	0	0	0	0	0
Australia	AUS	Capture	Flatheads nei	Flathead	Indian Ocean, Eastern	Marine fish	C71	Flathead	3.76	101084	79	735	823	982	1183	983	890	1078	1149	1211	1706	2178	2285	1500	2000	1500	657	541	460	1360	1640	1477	989	3102	2782	2432	2876	3781	5173	5064	3678	3071	3380	3688	3709	3697	3889	3714	3290
Australia	AUS	Capture	Flatheads nei	Flathead	Pacific, Southwest	Marine fish	C71	Flathead	3.76	60031.2	1414	1222	1060	1106	1217	1282	1343	1234	971	1023	1441	1840	1931	2797	2275	2120	3299	2629	2647	2760	2748	3098	2296	1564	1964	1671	1527	1849	1800	921	850	855	985	916	125	174	173	126	118
Australia	AUS	Capture	Flatheads nei	Flathead	Pacific, Western Central	Marine fish	C71	Flathead	3.76	1972.1	96	80	83	80	69	61	30	30	35	37	52	66	69	58	73	73	65	0	0	0	0	0	0	72	71	0	0	57	83	88	77	1	0	0	0	73	65	61	50
Australia	AUS	Capture	Freshwater fishes nei	Freshwater fish	Oceania - Inland waters	Freshwater fish	Weighted mean	Freshwater fish	4.3	51863.3	1308	1425	1210	935	1401	1127	1938	1646	2506	1994	1660	1909	1953	1950	2480	2400	3337	2834	122	301	252	194	200	154	166	162	105	268	281	500	334	1238	1275	1389	1376	1060	1059	1113	1227
Australia	AUS	Capture	Gadiformes nei	Gadiformes	Pacific, Western Central	Marine fish	C79	Gadiformes	4.1	2266.98	2	3	2	5	4	3	2	5	7	7	10	13	14	12	15	44	55	32	55	34	24	21	33	21	43	60	104	98	60	89	95	51	42	50	151	106	125	123	123
Australia	AUS	Capture	Geelbek croaker	Geelbeck croaker	Pacific, Southwest	Marine fish	Atractoscion aequidens (Cuvier, 1830)	Geelbeck croaker	4.5	1510	99	126	85	79	89	41	35	50	39	41	58	74	78	65	83	80	48	47	27	27	20	27	27	29	32	37	17	19	13	11	7	0	0	0	0	0	0	0	0
Australia	AUS	Capture	Ghost shark	Ghost shark	Indian Ocean, Eastern	Marine fish	Callorhinchus milii Bory de Saint-Vincent, 1823	Ghost shark	3.6	2517	0	0	0	0	0	0	0	0	0	0	0	0	0	0	0	0	0	0	0	0	0	49	21	14	82	105	102	141	112	115	146	118	130	144	162	138	156	139	123
Australia	AUS	Capture	Greenback horse mackerel	Greenback horse mackerel	Indian Ocean, Eastern	Marine fish	Trachurus declivis (Jenyns, 1841)	Greenback horse mackerel	3.9	32226	0	0	0	0	0	0	0	0	0	0	0	0	0	0	0	0	0	0	0	0	0	0	0	0	323	82	594	2250	3403	1923	889	608	363	462	273	37	26	25	37
Australia	AUS	Capture	Greenback horse mackerel	Greenback horse mackerel	Pacific, Southwest	Marine fish	Trachurus declivis (Jenyns, 1841)	Greenback horse mackerel	3.9	920	0	0	0	0	0	0	0	0	0	0	0	0	0	0	0	0	0	0	0	0	68	30	18	16	129	71	40	112	92	68	50	64	48	19	18	11	13	14	27
Australia	AUS	Capture	Grenadiers nei	Grenadiers	Indian Ocean, Antarctic	Marine fish	Coryphaenoides filicauda Günther, 1878	Grenadier	3.5	2651.9	0	0	0	0	0	0	0	0	0	0	0	0	0	0	0	0	0	0	0	0	0	0	0	1	3	0	0	15	29	34	9	62	19	119	102.31	143.13	91.38	159.3	175.69
Australia	AUS	Capture	Grey rockcod	Grey rockcod	Indian Ocean, Antarctic	Marine fish	Lepidonotothen squamifrons (Günther, 1880)	Grey rockcod	3.5	263.41	0	0	0	0	0	0	0	0	0	0	0	0	0	0	0	0	2	0	0	0	0	4	3	10	0	0	1	0	3	2	5	10	20	26	48.03	27.76	36.51	46.22	7.19
Australia	AUS	Capture	Grey rockcod	Grey rockcod	Indian Ocean, Eastern	Marine fish	Lepidonotothen squamifrons (Günther, 1880)	Grey rockcod	3.5	3727.14	0	0	0	0	0	0	0	0	0	0	0	0	0	0	0	0	0	0	0	0	0	0	0	0	336	297	290	297	415	463	460	426	354	333	0	0	0	15	7
Australia	AUS	Capture	Groupers, seabasses nei	Grouper, seabass	Indian Ocean, Eastern	Marine fish	C94	Grouper and seabass	4.01176	9479.62	51	39	44	45	63	67	51	72	105	111	156	199	209	175	223	220	83	95	323	377	657	1	4	60	74	84	51	66	106	125	153	121	118	424	396	423	440	466	361
Australia	AUS	Capture	Groupers, seabasses nei	Grouper, seabass	Pacific, Southwest	Marine fish	C92	Grouper and seabass	4.00571	5711	0	0	0	0	173	201	221	293	297	313	441	563	591	494	628	620	46	55	58	85	170	132	141	11	22	8	59	24	24	27	6	4	4	0	0	0	0	0	0
Australia	AUS	Capture	Groupers, seabasses nei	Grouper, seabass	Pacific, Western Central	Marine fish	C92	Grouper and seabass	4.00571	9922.39	249	176	177	177	209	202	2	6	3	3	4	5	5	4	5	5	55	32	55	34	33	22	34	0	3	0	1	8	12	13	2	8	6	3	959	849	771	781	873
Australia	AUS	Capture	Gummy shark	Gummy shark	Indian Ocean, Eastern	Marine fish	Mustelus antarcticus Günther, 1870	Gummy shark	4.5	72682	0	0	0	0	0	0	0	0	0	0	0	0	0	0	0	0	0	0	4626	3911	3878	4169	2858	2462	1796	2485	2414	2817	2945	2951	2704	2612	3216	2612	2365	2325	2150	2299	2229
Australia	AUS	Capture	Gummy shark	Gummy shark	Pacific, Southwest	Marine fish	Mustelus antarcticus Günther, 1870	Gummy shark	4.5	617	0	0	0	0	0	0	0	0	0	0	0	0	0	0	0	0	0	0	0	0	0	0	0	0	100	110	118	78	78	24	16	19	33	41	0	0	0	0	0
Australia	AUS	Capture	Halfbeaks nei	Halfbeak	Indian Ocean, Eastern	Marine fish	C115	Halfbeak	3.1	24547.3	537	402	370	392	534	603	955	645	683	720	1014	1295	1359	1136	1445	1400	239	158	163	174	138	565	580	530	691	746	678	510	470	554	531	457	393	421	393	354	367	344	347
Australia	AUS	Capture	Halfbeaks nei	Halfbeak	Pacific, Southwest	Marine fish	C116	Halfbeak	3.17778	5019	87	71	63	70	126	129	121	175	196	207	292	373	391	327	416	400	280	280	193	193	99	115	115	0	44	66	52	29	23	48	38	0	0	0	0	0	0	0	0
Australia	AUS	Capture	Halfbeaks nei	Halfbeak	Pacific, Western Central	Marine fish	C117	Halfbeak	3.15	1258	42	36	39	54	33	44	0	0	0	0	0	0	0	0	0	0	0	0	0	0	0	0	0	0	103	143	182	179	0	210	193	0	0	0	0	0	0	0	0
Australia	AUS	Capture	John dory	John dory	Indian Ocean, Eastern	Marine fish	Zeus faber Linnaeus, 1758	John dory	4.5	1674.75	0	0	21	26	19	21	26	19	18	19	27	34	36	30	38	40	3	2	1	0	3	0	1	21	26	22	32	33	44	48	41	29	31	137	92	81	92	81	74
Australia	AUS	Capture	John dory	John dory	Pacific, Southwest	Marine fish	Zeus faber Linnaeus, 1758	John dory	4.5	8571	230	251	248	170	224	203	215	263	254	268	378	483	507	424	539	530	333	309	403	401	119	118	102	154	173	157	131	153	171	100	62	38	71	100	62	44	55	50	41
Australia	AUS	Capture	Latchet(=Sharpbeak gurnard)	Latchet	Indian Ocean, Eastern	Marine fish	Pterygotrigla polyommata (Richardson, 1839)	Latchet	3.9	4089.04	0	0	1	6	10	18	29	7	17	15	21	27	28	23	29	30	22	43	26	0	0	60	25	55	66	78	88	117	137	207	245	199	140	154	163	134	172	237	266
Australia	AUS	Capture	Latchet(=Sharpbeak gurnard)	Latchet	Pacific, Southwest	Marine fish	Pterygotrigla polyommata (Richardson, 1839)	Latchet	3.9	3910	155	59	149	122	178	162	143	119	91	96	135	172	180	150	191	190	120	133	127	121	58	76	67	39	54	73	54	65	67	37	32	33	33	47	66	43	55	95	62
Australia	AUS	Capture	Australian spiny lobster	Lobster	Indian Ocean, Eastern	Crustacean	Crustacean	Crustacean	2.5	444901	8757	9117	10773	11461	10738	9956	10483	12456	10689	11264	11000	11025	11569	14150	11943	10676	12194	12366	11046	10886	9902	9896	10400	13065	14605	11353	9050	11477	13745	12304	10441	8676	8990	7637	7260	6527	5988	7165	7025.14
Australia	AUS	Capture	Green rock lobster	Lobster	Pacific, Southwest	Crustacean	Crustacean	Crustacean	2.5	4869	119	96	93	68	108	99	144	155	158	167	150	200	210	79	87	86	98	100	143	151	97	104	108	110	117	103	103	122	108	99	101	110	122	122	122	130	142	138	146
Australia	AUS	Capture	Metanephrops lobsters nei	Lobster	Indian Ocean, Eastern	Crustacean	Crustacean	Crustacean	2.5	832.06	0	0	0	0	0	0	0	0	0	0	0	0	0	0	0	0	0	0	0	0	0	0	0	0	39	105	88	0	63	61	42	43	15	35	26	28	21	31	34
Australia	AUS	Capture	Metanephrops lobsters nei	Lobster	Pacific, Western Central	Crustacean	Crustacean	Crustacean	2.5	350.45	0	0	0	0	0	0	0	0	0	0	0	0	0	0	0	0	0	0	0	0	0	0	0	0	0	0	9	0	16	10	18	8	24	31	25	6	18	24	12
Australia	AUS	Capture	Slipper lobsters nei	Lobster	Indian Ocean, Eastern	Crustacean	Crustacean	Crustacean	2.5	385.52	2	1	1	0	26	19	8	5	7	7	7	7	7	0	0	0	0	0	18	13	21	0	0	0	0	0	0	0	0	27	22	15	20	18	33	19	12	13	8
Australia	AUS	Capture	Slipper lobsters nei	Lobster	Pacific, Southwest	Crustacean	Crustacean	Crustacean	2.5	1478	23	43	62	39	36	61	63	47	62	65	60	64	67	60	63	65	102	114	28	1	1	158	156	7	0	0	0	0	0	9	6	2	2	3	3	2	1	1	1
Australia	AUS	Capture	Slipper lobsters nei	Lobster	Pacific, Western Central	Crustacean	Crustacean	Crustacean	2.5	9856.47	60	48	126	278	247	292	266	293	293	309	300	302	317	424	467	413	506	603	901	773	600	717	789	0	0	0	0	0	0	56	56	36	33	22	13	16	28	42	43
Australia	AUS	Capture	Southern rock lobster	Lobster	Indian Ocean, Eastern	Crustacean	Crustacean	Crustacean	2.5	176968	3932	3385	3411	3501	3580	4763	5048	5066	4806	5065	4500	5000	5247	2775	3025	3021	5520	5164	4635	4507	4856	4888	4615	4655	4756	4677	4403	4271	4500	4426	4258	4294	4099	3497	3140	3132	2948	2955	3054
Australia	AUS	Capture	Tropical spiny lobsters nei	Lobster	Pacific, Western Central	Crustacean	Crustacean	Crustacean	2.5	16768.3	5	6	21	10	30	20	6	2	2	2	2	3	3	242	211	171	147	174	185	182	201	233	551	520	359	274	330	1211	1471	1061	768	675	655	440	940	951	678	613	843
Australia	AUS	Capture	Longtail tuna	Longtail tuna	Indian Ocean, Eastern	Marine fish	Thunnus tonggol (Bleeker, 1851)	Longtail tuna	4.5	901.78	3	2	10	19	5	5	0	9	131	138	135	16	40	19	52	14	13	0	2	1	0	0	0	31	8	58	23	28	17	19	4	0	1	1	0.4	13.85	13.81	4.56	5.8
Australia	AUS	Capture	Longtail tuna	Longtail tuna	Pacific, Western Central	Marine fish	Thunnus tonggol (Bleeker, 1851)	Longtail tuna	4.5	236.85	14	28	24	29	4	13	0	0	0	0	0	0	0	0	0	0	26	7	7	16	10	0	0	0	3	7	6	4	5	2	2	3	6	0	0	0	0	0	0
Australia	AUS	Capture	Mackerels nei	Mackerel	Indian Ocean, Eastern	Marine fish	C145	Mackerel	3.71667	37732	6	8	139	12	10	18	28	26	364	384	541	691	725	606	771	700	444	400	462	471	502	2	0	1478	462	445	465	844	609	551	1821	1795	1240	2415	1382	694	422	338	308
Australia	AUS	Capture	Mackerels nei	Mackerel	Pacific, Southwest	Marine fish	C146	Mackerel	3.775	5983.21	0	0	0	0	0	0	0	0	0	0	0	0	0	0	0	0	41	71	414	408	400	0	0	458	781	412	847	1144	777	87	77	15	49	0	0	0	0	0	0
Australia	AUS	Capture	Mackerels nei	Mackerel	Pacific, Western Central	Marine fish	C147	Mackerel	3.85556	48446.8	0	0	0	0	0	0	0	0	1	1	1	1	1	1	2	2	0	0	0	0	85	87	91	1792	2068	2286	1750	3380	2716	2604	2353	2317	2071	1300	2401	2504	2409	2290	2191
Australia	AUS	Capture	Mackerel icefish	Mackerel icefish	Indian Ocean, Antarctic	Marine fish	Champsocephalus gunnari Lönnberg, 1905	Mackerel icefish	3.2	11787.1	0	0	0	0	0	0	0	0	0	0	0	0	0	0	2	0	5	3	0	0	0	227	116	2	137	1136	865	2345	78	1851	660	1	199	83	352.46	0.6	157.17	742.64	864.85
Australia	AUS	Capture	Marine fishes nei	Marine fish	Atlantic, Southwest	Marine fish	Weighted mean	Marine fish	3.84561	623	0	0	0	0	0	0	0	0	0	0	0	0	0	0	0	0	0	0	0	0	0	0	234	389	0	0	0	0	0	0	0	0	0	0	0	0	0	0	0
Australia	AUS	Capture	Marine fishes nei	Marine fish	Indian Ocean, Eastern	Marine fish	Weighted mean	Marine fish	3.53096	348109	13549	15159	4734	3938	3747	3178	2198	2581	926	1867	7433	9642	6711	1556	10630	4508	21247	20820	5031	13431	11499	15562	14547	19367	7511	827	11955	8576	11766	11964	9223	8649	6611	2511	5757	3970	4022	5583	4853
Australia	AUS	Capture	Marine fishes nei	Marine fish	Pacific, Southwest	Marine fish	Weighted mean	Marine fish	3.76755	203707	1223	1842	1768	4676	1491	1656	1387	1647	1975	2081	2932	3743	3928	1000	1392	7684	8984	10281	9109	7797	12829	13950	19477	3693	1932	2283	2121	1945	2292	4293	3058	6455	5508	6408	5988	5712	4154.13	3509.09	3370.12
Australia	AUS	Capture	Marine fishes nei	Marine fish	Pacific, Western Central	Marine fish	Weighted mean	Marine fish	3.76021	158406	355	457	400	387	644	917	3681	3939	3612	3031	5405	7929	8061	4542	6756	7683	4914	4866	3827	4500	5326	197	422	7335	4617	5765	6321	5652	6298	3846	3554	4718	4208	4648	3021	2691	2712	1442	1510
Australia	AUS	Capture	Marlins,sailfishes,etc. nei	Marlin, sailfish	Pacific, Western Central	Marine fish	C154	Marlin and sailfish	4.5	5404.09	0	0	0	0	0	0	0	0	0	0	0	0	0	0	0	0	0	0	0	0	199	1084	1929	2185	3	4	0	0	0	0	0	0	0	0	0	0	0	0	0
Australia	AUS	Capture	Mirror dory	Mirror dory	Indian Ocean, Eastern	Marine fish	Zenopsis nebulosa (Temminck & Schlegel, 1845)	Mirror dory	4.4	5671.43	0	0	0	0	0	0	0	0	0	0	0	0	0	0	0	0	11	81	0	0	4	9	37	0	70	111	279	325	277	188	171	104	202	447	535	625	549	353	198
Australia	AUS	Capture	Mirror dory	Mirror dory	Pacific, Southwest	Marine fish	Zenopsis nebulosa (Temminck & Schlegel, 1845)	Mirror dory	4.4	10998	0	0	0	0	0	0	177	243	210	221	311	397	417	348	443	400	695	467	453	361	348	420	507	378	245	146	144	325	445	390	327	198	241	271	279	345	349	237	116
Australia	AUS	Capture	Morwongs	Morwongs	Indian Ocean, Eastern	Marine fish	Goniistius zonatus (Cuvier, 1830)	Morwongs	3.3	21145.7	214	309	630	427	738	943	740	350	342	360	507	647	679	567	721	720	57	48	74	75	77	94	95	638	604	776	716	768	733	772	763	625	616	718	602	577	573	508	357
Australia	AUS	Capture	Morwongs	Morwongs	Pacific, Southwest	Marine fish	Goniistius zonatus (Cuvier, 1830)	Morwongs	3.3	41276.1	1476	1300	1058	1038	1276	1969	1906	1568	1549	1632	2299	2935	3080	2394	1287	1248	1206	1146	1199	1225	1108	1419	1083	696	512	425	319	375	334	335	339	273	323	267	225	244	37.37	33.76	27.3
Australia	AUS	Capture	Mullets nei	Mullet	Indian Ocean, Eastern	Marine fish	C163	Mullet	2.33636	49916.5	1802	1678	1495	1609	1669	1804	1853	1865	1541	1624	2288	2921	3065	2561	3258	3250	754	776	773	751	607	674	679	361	704	536	444	610	652	573	501	461	564	523	550	554	424	446	477
Australia	AUS	Capture	Mullets nei	Mullet	Pacific, Southwest	Marine fish	C164	Mullet	2.4	155037	2721	2595	3041	2664	3159	3356	3127	3047	2829	2981	4200	5362	5627	2969	3128	3502	3403	3671	5683	5674	4258	4306	4451	3456	3151	3916	4482	3729	3237	4005	3980	3550	3722	1766	4060	3325	3229	2441	3926
Australia	AUS	Capture	Mullets nei	Mullet	Pacific, Western Central	Marine fish	C165	Mullet	2.38333	79532.1	1475	1362	1560	1327	1383	1515	1500	1500	1500	2000	2200	2300	2500	2529	2886	1611	2349	1448	1486	1350	1627	1630	1484	2579	1694	2631	1909	2088	2322	1749	1803	1590	1840	1864	1938	1675	1739	2099	1681
Australia	AUS	Capture	Narrow-barred Spanish mackerel	Narrow-barred Spanish mackerel	Indian Ocean, Eastern	Marine fish	Scomberomorus commerson (Lacepède, 1800)	Narrow-barred Spanish mackerel	4.5	11048.3	0	0	0	0	0	0	0	0	0	0	0	0	0	216	211	387	325	445	513	444	471	622	540	336	307	490	468	491	432	312	261	325	323	284	283.69	284.36	318.17	270.58	322.07
Australia	AUS	Capture	Narrow-barred Spanish mackerel	Narrow-barred Spanish mackerel	Pacific, Southwest	Marine fish	Scomberomorus commerson (Lacepède, 1800)	Narrow-barred Spanish mackerel	4.5	957	71	91	113	87	77	130	28	31	14	15	15	20	21	18	23	20	47	47	17	17	9	23	23	0	0	0	0	0	0	0	0	0	0	0	0	0	0	0	0
Australia	AUS	Capture	Narrow-barred Spanish mackerel	Narrow-barred Spanish mackerel	Pacific, Western Central	Marine fish	Scomberomorus commerson (Lacepède, 1800)	Narrow-barred Spanish mackerel	4.5	15685.4	972	933	1044	774	806	863	108	120	187	197	193	180	189	495	610	569	644	779	796	785	680	830	1054	0	251	251	0	0	0	0	208	161	109	70	82	75	78	85	106
Australia	AUS	Capture	Seerfishes nei	Narrow-barred Spanish mackerel	Indian Ocean, Eastern	Marine fish	Scomberomorus commerson (Lacepède, 1800)	Narrow-barred Spanish mackerel	4.5	7640	110	90	127	146	139	151	248	231	256	300	300	230	310	110	131	152	117	111	126	89	131	171	0	0	22	55	3	0	6	508	1897	0	0	0	972	400	0	1	0
Australia	AUS	Capture	Seerfishes nei	Narrow-barred Spanish mackerel	Pacific, Southwest	Marine fish	Scomberomorus commerson (Lacepède, 1800)	Narrow-barred Spanish mackerel	4.5	2445	0	0	0	0	0	0	103	117	156	164	161	150	157	131	166	150	497	493	0	0	0	0	0	0	0	0	0	0	0	0	0	0	0	0	0	0	0	0	0
Australia	AUS	Capture	Octopuses, etc. nei	Octopus	Indian Ocean, Eastern	Cephalopod	Cephalopod	Cephalopod	3	8673.38	0	0	0	0	0	0	0	0	0	0	0	0	0	0	0	0	221	218	135	111	74	84	69	121	152	158	147	124	361	274	246	313	403	331	337	538	393	478	445
Australia	AUS	Capture	Octopuses, etc. nei	Octopus	Pacific, Southwest	Cephalopod	Cephalopod	Cephalopod	3	6680.24	0	0	0	0	0	0	0	0	0	0	0	0	0	0	0	0	0	0	0	0	0	506	714	439	279	578	470	573	542	345	220	164	176	96	257	121	75.5	85	177
Australia	AUS	Capture	Orange roughy	Orange roughy	Indian Ocean, Eastern	Marine fish	Hoplostethus atlanticus Collett, 1889	Orange roughy	4.3	52726.1	0	0	0	0	0	0	0	0	0	0	0	0	0	1966	1712	959	627	432	668	227	357	350	4857	7553	4974	5197	3961	4455	2558	3250	2373	1120	288	661	653	280	264	217	210
Australia	AUS	Capture	Orange roughy	Orange roughy	Pacific, Southwest	Marine fish	Hoplostethus atlanticus Collett, 1889	Orange roughy	4.3	157994	0	0	0	0	0	0	0	0	0	0	2600	5400	6900	13542	37901	33111	18187	12050	9977	7070	4526	3129	3207	28	26	17	14	54	56	144	8	9	0	2	1	2	1	1	2
Australia	AUS	Capture	Parore	Parore	Pacific, Southwest	Marine fish	Girella tricuspidata (Quoy & Gaimard, 1824)	Parore	2.1	9558.48	0	0	0	0	0	0	0	0	0	0	0	0	0	0	0	0	0	0	0	0	501	507	496	503	541	559	525	485	390	326	372	435	391	302	302	367	429	398	372
Australia	AUS	Capture	Patagonian grenadier	Patagonian grenadier	Atlantic, Southwest	Marine fish	Macruronus magellanicus Lönnberg, 1907	Patagonian grenadier	3.9	408	0	0	0	0	0	0	0	0	0	0	0	0	0	0	0	0	0	0	0	0	0	0	31	377	0	0	0	0	0	0	0	0	0	0	0	0	0	0	0
Australia	AUS	Capture	Patagonian toothfish	Patagonian toothfish	Indian Ocean, Antarctic	Marine fish	Dissostichus eleginoides Smitt, 1898	Patagonian toothfish	4.5	66671.4	0	0	0	0	0	0	0	0	0	0	0	0	0	0	1	0	0	0	0	0	0	1927	3765	3547	3566	2981	2756	2844	2864	2745	2528	2387	2281	2464	2436.14	2548.01	2726.34	2718.05	2800.62
Australia	AUS	Capture	Patagonian toothfish	Patagonian toothfish	Pacific, Southwest	Marine fish	Dissostichus eleginoides Smitt, 1898	Patagonian toothfish	4.5	452	0	0	0	0	0	0	0	0	0	0	0	0	0	0	0	0	0	0	0	0	0	0	0	0	0	0	0	0	0	0	0	0	0	452	0	0	0	0	0
Australia	AUS	Capture	Pelagic percomorphs nei	Pelagic fish	Indian Ocean, Eastern	Marine fish	Weighted mean	Pelagic fish	3.53096	32639	240	97	365	270	365	474	433	456	792	835	1176	1501	1575	1316	1674	1670	3200	3700	3500	5000	4000	0	0	0	0	0	0	0	0	0	0	0	0	0	0	0	0	0	0
Australia	AUS	Capture	Pelagic percomorphs nei	Pelagic fish	Pacific, Southwest	Marine fish	Weighted mean	Pelagic fish	3.76755	29790	290	446	323	260	584	591	908	1188	1634	1722	2426	3097	3250	1716	1455	1400	3000	2500	2000	1000	0	0	0	0	0	0	0	0	0	0	0	0	0	0	0	0	0	0	0
Australia	AUS	Capture	Pelagic percomorphs nei	Pelagic fish	Pacific, Western Central	Marine fish	Weighted mean	Pelagic fish	3.76021	614.07	75	68	70	78	71	25	15	21	8	8	11	14	15	13	16	16	15	15	20	20	20	0	0	0	0	0	0	0	0	0	0	0	0	0	0	0	0	0	0
Australia	AUS	Capture	Percoids nei	Perch	Indian Ocean, Eastern	Marine fish	C347	Perch	3.6	7560.09	220	241	237	265	323	261	234	312	382	403	568	725	761	636	809	810	9	0	7	6	351	0	0	0	0	0	0	0	0	0	0	0	0	0	0	0	0	0	0
Australia	AUS	Capture	Percoids nei	Perch	Pacific, Southwest	Marine fish	C348	Perch	3.75	10481	565	577	421	325	349	387	468	491	449	473	666	850	892	745	948	500	146	145	130	130	146	131	131	0	69	42	54	59	65	65	62	0	0	0	0	0	0	0	0
Australia	AUS	Capture	Pink cusk-eel	Pink cusk-eel	Indian Ocean, Eastern	Marine fish	Genypterus blacodes (Forster, 1801)	Pink cusk-eel	4.2	28006.6	2	1	0	0	0	0	1	0	1	1	1	1	1	1	2	2	0	0	0	0	1397	1923	1830	1881	1148	1153	1217	1229	1265	1384	980	840	947	1046	871	1105	1217	1002	809
Australia	AUS	Capture	Pink cusk-eel	Pink cusk-eel	Pacific, Southwest	Marine fish	Genypterus blacodes (Forster, 1801)	Pink cusk-eel	4.2	7010	81	30	20	16	78	35	31	31	82	86	121	154	162	135	172	170	80	78	73	85	0	0	0	0	941	561	435	384	422	418	345	218	204	200	156	241	222	244	136
Australia	AUS	Capture	Porgies, seabreams nei	Porgy, seabream	Indian Ocean, Eastern	Marine fish	C190	Porgy and seabream	3.375	18735.2	39	229	218	213	344	360	392	385	558	588	828	1057	1109	927	1179	1100	260	320	643	552	278	113	159	325	794	832	681	395	447	540	483	192	277	151	155	186	209	187	150
Australia	AUS	Capture	Porgies, seabreams nei	Porgy, seabream	Pacific, Southwest	Marine fish	C191	Porgy and seabream	3.56667	20745.1	322	373	338	334	517	581	637	542	463	488	688	878	921	770	979	980	599	575	727	722	502	498	439	378	333	340	336	390	335	393	382	477	354	230	306	343	262	294	359
Australia	AUS	Capture	Porgies, seabreams nei	Porgy, seabream	Pacific, Western Central	Marine fish	C191	Porgy and seabream	3.56667	6065.53	311	280	274	246	158	229	0	1	1	1	1	1	1	1	2	2	199	136	127	133	160	169	157	156	182	197	169	147	223	217	229	197	279	173	169	114	128	158	134
Australia	AUS	Capture	Banana prawn	Prawn	Indian Ocean, Eastern	Crustacean	Crustacean	Crustacean	2.5	7637	0	0	0	0	0	0	0	0	0	0	0	0	0	0	0	0	0	0	0	0	0	0	0	517	329	281	345	509	470	293	473	112	244	4064	0	0	0	0	0
Australia	AUS	Capture	Banana prawn	Prawn	Pacific, Western Central	Crustacean	Crustacean	Crustacean	2.5	144603	0	0	0	0	0	0	0	0	0	0	0	0	0	5567	2541	6987	2508	4058	2433	4490	4347	4546	3711	3608	2257	6368	5493	3294	4057	3034	3162	2972	5744	6109	6598	8840	5396	3837	6709
Australia	AUS	Capture	Giant tiger prawn	Prawn	Indian Ocean, Eastern	Crustacean	Crustacean	Crustacean	2.5	237	0	0	0	0	0	0	0	0	0	0	0	0	0	0	0	0	0	0	0	0	0	0	0	0	2	14	23	75	49	29	16	1	9	19	0	0	0	0	0
Australia	AUS	Capture	Giant tiger prawn	Prawn	Pacific, Western Central	Crustacean	Crustacean	Crustacean	2.5	114587	0	0	0	0	0	0	0	0	0	0	0	0	0	4140	3707	4038	4906	3477	3339	4368	3841	3055	3686	3477	4586	4247	4168	4420	5059	4320	4212	3622	2433	2726	2777	3223	2163	2585	3452
Australia	AUS	Capture	Western king prawn	Prawn	Pacific, Western Central	Crustacean	Crustacean	Crustacean	2.5	1984	0	0	0	0	0	0	0	0	0	0	0	0	0	98	127	166	136	93	88	111	76	67	110	81	92	71	169	124	86	61	66	74	62	26	0	0	0	0	0
Australia	AUS	Capture	Puffers nei	Puffer	Indian Ocean, Eastern	Marine fish	C197	Puffer	3.95	2955.85	0	0	0	0	0	0	0	0	0	0	0	0	0	0	0	0	0	0	0	0	0	0	0	0	0	0	0	0	0	0	0	0	0	0	0	0	0	472	490
Australia	AUS	Capture	Puffers nei	Puffer	Pacific, Southwest	Marine fish	C197	Puffer	3.95	438	0	0	0	0	0	0	0	0	0	0	0	0	0	0	0	0	0	0	0	0	0	0	0	0	0	0	0	0	0	0	0	0	0	0	0	0	0	199	123
Australia	AUS	Capture	Rays, stingrays, mantas nei	Ray, stingray, manta	Indian Ocean, Antarctic	Marine fish	C204	Ray and stingray and manta	3.55	362.11	0	0	0	0	0	0	0	0	0	0	0	0	0	0	0	0	1	0	0	0	0	3	3	2	0	0	0	0	59	70	8	4	3	16	11.46	2.49	7.93	14.04	14.7
Australia	AUS	Capture	Rays, stingrays, mantas nei	Ray, stingray, manta	Indian Ocean, Eastern	Marine fish	C204	Ray and stingray and manta	3.55	1636.76	0	0	0	0	0	0	0	0	0	0	0	0	0	0	0	0	0	0	17	22	55	0	0	8	11	24	36	46	87	105	90	48	53	93	83	93	76	86	104
Australia	AUS	Capture	Rays, stingrays, mantas nei	Ray, stingray, manta	Pacific, Southwest	Marine fish	C204	Ray and stingray and manta	3.55	1647	8	1	15	32	14	19	46	20	27	28	39	50	52	43	55	50	22	29	75	68	70	72	67	43	45	46	42	74	84	61	23	24	37	40	29	37	32	40	52
Australia	AUS	Capture	Rays, stingrays, mantas nei	Ray, stingray, manta	Pacific, Western Central	Marine fish	C204	Ray and stingray and manta	3.55	287	60	60	47	55	65	0	0	0	0	0	0	0	0	0	0	0	0	0	0	0	0	0	0	0	0	0	0	0	0	0	0	0	0	0	0	0	0	0	0
Australia	AUS	Capture	Redfish	Redfish	Indian Ocean, Eastern	Marine fish	Centroberyx affinis (Günther, 1859)	Redfish	3.8	10668.6	0	0	0	0	0	0	0	0	0	0	0	0	0	0	0	0	0	0	0	0	0	0	0	0	337	408	237	383	968	1015	802	1038	820	887	673	455	444	353	308
Australia	AUS	Capture	Redfish	Redfish	Pacific, Southwest	Marine fish	Centroberyx affinis (Günther, 1859)	Redfish	3.8	12582	0	0	0	0	0	0	0	0	0	0	0	0	0	0	0	0	0	0	0	0	1284	1357	1812	1555	1069	802	913	846	693	507	488	216	222	190	181	136	85	64	89
Australia	AUS	Capture	Gadiformes nei	Ridge scaled rattail	Indian Ocean, Eastern	Marine fish	Macrourus carinatus (Günther, 1878)	Ridge scaled rattail	3.7	203	0	0	0	0	0	0	0	0	0	0	0	0	0	0	0	0	0	0	1	0	0	0	0	5	20	5	9	5	18	2	14	11	9	5	6	8	11	10	11
Australia	AUS	Capture	Percoids nei	Rosy grubfish	Pacific, Western Central	Marine fish	Ryukyupercis gushikeni (Yoshino, 1975)	Rosy grubfish	3.6	1710	378	348	309	292	263	83	3	0	3	3	4	5	5	4	5	5	0	0	0	0	0	0	0	0	0	0	0	0	0	0	0	0	0	0	0	0	0	0	0
Australia	AUS	Capture	Rudderfish	Rudderfish	Pacific, Southwest	Marine fish	Centrolophus niger (Gmelin, 1789)	Rudderfish	3.9	829.91	0	0	0	0	0	0	0	0	0	0	0	0	0	0	0	0	0	0	0	0	0	0	0	0	0	0	0	0	0	0	0	0	0	182	148	94	80	41	41
Australia	AUS	Capture	Ruff	Ruffe	Indian Ocean, Eastern	Marine fish	Gymnocephalus cernua (Linnaeus, 1758)	Ruffe	3.3	48194.2	867	801	1173	1163	1130	1084	1118	1338	1499	1580	2226	2842	2982	2492	3169	3100	2500	1500	1095	1063	1302	1287	1008	1066	1143	992	860	727	591	465	483	335	407	325	382	266	267	425	298
Australia	AUS	Capture	Ruffs, barrelfishes nei	Ruffe	Indian Ocean, Eastern	Marine fish	Gymnocephalus cernua (Linnaeus, 1758)	Ruffe	3.3	144	0	0	0	0	0	0	0	0	0	0	0	0	0	0	0	0	0	0	0	0	0	0	0	0	0	0	0	0	0	0	0	0	0	24	21	27	10	11	12
Australia	AUS	Capture	Sand flounders nei	Sand flounder	Indian Ocean, Eastern	Marine fish	Rhombosolea plebeia (Richardson, 1843)	Sand flounder	3.1	202	0	0	0	0	0	0	0	0	0	0	0	0	0	0	0	0	6	5	49	34	26	26	26	29	1	0	0	0	0	0	0	0	0	0	0	0	0	0	0
Australia	AUS	Capture	Sand flounders nei	Sand flounder	Pacific, Southwest	Marine fish	Rhombosolea plebeia (Richardson, 1843)	Sand flounder	3.1	1794	12	188	231	80	97	50	39	50	66	70	99	126	132	110	140	140	34	34	32	32	1	1	2	28	0	0	0	0	0	0	0	0	0	0	0	0	0	0	0
Australia	AUS	Capture	Clupeoids nei	Sardine, Pilchard	Indian Ocean, Eastern	Marine fish	C34	Sardine and Pilchard	2.78571	878034	1411	1355	2032	1809	1801	2072	2627	2958	8764	9236	13013	16614	17434	10527	11881	12968	9768	11020	11484	12820	12697	13028	7801	4377	5499	8525	14460	25005	36065	48918	31484	32952	33121	31658	39673	38225	41319	38436	35866
Australia	AUS	Capture	Clupeoids nei	Sardine, Pilchard	Pacific, Southwest	Marine fish	C34	Sardine and Pilchard	2.78571	15038	219	244	273	217	142	222	271	318	352	371	523	668	701	586	745	700	465	464	432	432	333	417	417	0	65	40	42	290	607	1392	2181	0	525	148	0	6	24	16	77
Australia	AUS	Capture	Sawsharks nei	Sawshark	Indian Ocean, Eastern	Marine fish	C215	Sawshark	4.1	7183.44	0	0	0	0	0	0	0	0	0	0	0	0	0	0	0	0	0	0	0	0	0	0	0	0	270	423	371	459	519	511	499	386	384	374	310	367	266	314	285
Australia	AUS	Capture	Sea catfishes nei	Sea catfish	Indian Ocean, Eastern	Marine fish	C226	Sea catfish	3.67143	322	3	3	0	0	18	6	5	22	1	1	1	1	1	1	2	2	3	6	14	14	218	0	0	0	0	0	0	0	0	0	0	0	0	0	0	0	0	0	0
Australia	AUS	Capture	Sea catfishes nei	Sea catfish	Pacific, Southwest	Marine fish	C226	Sea catfish	3.67143	123	0	0	0	0	0	0	0	0	0	0	0	0	0	0	0	0	1	1	0	0	21	21	21	32	0	4	4	6	4	4	4	0	0	0	0	0	0	0	0
Australia	AUS	Capture	Sea catfishes nei	Sea catfish	Pacific, Western Central	Marine fish	C226	Sea catfish	3.67143	165	0	0	3	4	6	1	3	3	2	2	3	4	4	3	4	4	17	41	8	17	17	18	0	0	0	0	0	1	0	0	0	0	0	0	0	0	0	0	0
Australia	AUS	Capture	Sharks, rays, skates, etc. nei	Shark, ray, skate	Indian Ocean, Eastern	Marine fish	C330	Shark and ray and skate	4.28333	162269	3219	5434	6460	5966	7522	7639	7908	7566	5469	5682	3217	3955	7582	6500	5000	6000	7603	8483	2102	2597	2533	1497	829	1000	2397	2508	2936	2616	2671	3054	1994	1629	1667	2092	2057	1816	1674	1821	1805
Australia	AUS	Capture	Sharks, rays, skates, etc. nei	Shark, ray, skate	Pacific, Southwest	Marine fish	C331	Shark and ray and skate	4.22632	43263.6	1198	1331	1453	1450	1742	1638	1614	1729	1596	1682	2370	3026	3175	1133	1169	864	675	887	1326	1324	1040	1152	1382	659	751	918	905	1001	1149	496	400	273	250	316	253	278	151.62	139.44	92.43
Australia	AUS	Capture	Sharks, rays, skates, etc. nei	Shark, ray, skate	Pacific, Western Central	Marine fish	C331	Shark and ray and skate	4.22632	46119.8	20	30	21	38	62	221	45	44	46	408	106	359	207	579	458	383	495	529	1006	938	1040	1243	1215	2014	1495	2223	2279	2730	3198	3032	2623	2585	2481	2564	1627	1587	1467	986	730
Australia	AUS	Capture	Shortbill spearfish	Shortbill spearfish	Pacific, Southwest	Marine fish	Tetrapturus angustirostris Tanaka, 1915	Shortbill spearfish	4.5	222.63	0	0	0	0	0	0	0	0	0	0	0	0	0	0	0	0	0	0	0	0	0	0	0	0	0	0	6	11	8	8	4	5	2	16	17	27	11	11	14
Australia	AUS	Capture	River eels nei	Short-finned eel	Oceania - Inland waters	Freshwater fish	Anguilla australis Richardson, 1841	Short-finned eel	4.3	3855	0	0	0	35	55	99	75	87	44	45	50	50	50	50	64	200	174	177	462	520	453	418	393	178	176	0	0	0	0	0	0	0	0	0	0	0	0	0	0
Australia	AUS	Capture	Short-finned eel	Short-finned eel	Indian Ocean, Eastern	Marine fish	Anguilla australis Richardson, 1841	Short-finned eel	4.3	6148	18	12	14	130	173	156	131	147	243	183	200	200	200	200	254	300	252	349	365	259	208	203	160	129	133	175	172	106	105	87	80	70	84	57	44	42	113	86	94
Australia	AUS	Capture	Short-finned eel	Short-finned eel	Pacific, Southwest	Marine fish	Anguilla australis Richardson, 1841	Short-finned eel	4.3	158	0	0	0	0	0	0	0	0	0	0	0	0	0	0	0	0	0	0	0	0	0	0	0	0	37	38	28	27	13	10	5	0	0	0	0	0	0	0	0
Australia	AUS	Capture	Endeavour shrimp	Shrimp	Indian Ocean, Eastern	Crustacean	Crustacean	Crustacean	2.5	166	0	0	0	0	0	0	0	0	0	0	0	0	0	0	0	0	0	0	0	0	0	0	0	0	38	23	28	9	13	36	5	1	5	8	0	0	0	0	0
Australia	AUS	Capture	Endeavour shrimp	Shrimp	Pacific, Western Central	Crustacean	Crustacean	Crustacean	2.5	54309.3	0	0	0	0	0	0	0	0	0	0	0	0	0	1320	1393	1660	2043	1801	1920	1945	2175	2245	2885	2575	3457	3314	2925	2102	2248	1862	1947	1523	1104	1137	1034	1038	1112	1093	987
Australia	AUS	Capture	Penaeus shrimps nei	Shrimp	Indian Ocean, Eastern	Crustacean	Crustacean	Crustacean	2.5	253097	7170	5892	6249	5950	5836	5483	5904	6166	6179	5112	4600	5180	5630	6069	4900	5607	5445	5221	5689	6080	6226	6051	6884	7516	7332	6322	6319	5994	6024	5839	5485	4888	5105	5052	5062	5723	5236	4490	5082
Australia	AUS	Capture	Penaeus shrimps nei	Shrimp	Pacific, Southwest	Crustacean	Crustacean	Crustacean	2.5	86515.3	2472	2619	2430	1981	2436	2736	2958	2765	3060	2670	2400	2700	2940	2850	2810	2462	2273	2100	2312	2153	1822	1926	1683	2399	2829	3024	2292	2233	1827	869	1352	1468	1830	1689	1472	1611	504.12	679.97	624.87
Australia	AUS	Capture	Penaeus shrimps nei	Shrimp	Pacific, Western Central	Crustacean	Crustacean	Crustacean	2.5	321362	9836	14585	10593	13793	13723	18707	12986	12718	13492	12753	11500	12920	14030	7831	6951	6942	6705	7207	6368	7440	8986	8172	8303	5539	2838	3660	3904	4326	4015	3511	3282	2829	3221	3484	4523	2868	3246	3937	3575
Australia	AUS	Capture	Sillago-whitings	Sillago-whitings	Indian Ocean, Eastern	Marine fish	Sillago sihama (Forsskål, 1775)	Sillago-whitings	3.3	72939.9	1279	1911	1767	1832	1578	1984	2237	1991	1965	2071	2918	3725	3909	2267	4156	4100	377	352	294	303	899	1105	1219	924	1717	1696	1544	1713	1383	1224	1257	1342	1250	1257	1252	1193	1177	1341	1354
Australia	AUS	Capture	Sillago-whitings	Sillago-whitings	Pacific, Southwest	Marine fish	Sillago sihama (Forsskål, 1775)	Sillago-whitings	3.3	54404.3	334	400	261	417	757	774	1043	1265	911	960	1353	1727	1812	1352	1563	1840	1684	1580	2002	1826	1169	700	607	1804	1115	1443	1594	2126	1866	1469	1615	1467	1397	1044	1020	1400	1220	992	706
Australia	AUS	Capture	Sillago-whitings	Sillago-whitings	Pacific, Western Central	Marine fish	Sillago sihama (Forsskål, 1775)	Sillago-whitings	3.3	41250.2	380	406	354	317	318	298	1	1	0	0	0	0	0	373	978	1832	557	1411	1835	2569	2321	2140	1828	1233	1246	814	1197	956	900	1283	1485	1357	1014	1049	1336	1421	796	1116	864
Australia	AUS	Capture	Silver gemfish	Silver gemfish	Indian Ocean, Eastern	Marine fish	Rexea solandri (Cuvier, 1832)	Silver gemfish	4.3	28627.9	8	3	1	9	898	851	532	453	469	494	696	889	933	780	992	990	3000	3000	3000	3000	2000	0	0	4	447	482	224	294	503	430	469	500	441	277	230	247	208	144	142
Australia	AUS	Capture	Silver gemfish	Silver gemfish	Pacific, Southwest	Marine fish	Rexea solandri (Cuvier, 1832)	Silver gemfish	4.3	67470.5	739	2109	2382	4533	3784	3899	3387	2593	2327	2452	3455	4411	4629	3868	4920	4500	3000	3000	2000	2000	1000	339	598	454	220	89	70	59	71	60	61	39	66	96	52	59	48	45	32
Australia	AUS	Capture	Silver seabream	Silver seabream	Indian Ocean, Eastern	Marine fish	Pagrus auratus (Forster, 1801)	Silver seabream	3.6	86931.6	771	1149	1088	956	1332	1322	1175	1300	1502	1583	2230	2847	2987	2242	2189	1897	1776	2321	2611	3025	3293	3213	2487	2588	2501	3391	3453	3987	3379	2673	2748	2563	1869	1442	1593	1607	1630	1223	1229
Australia	AUS	Capture	Silver seabream	Silver seabream	Pacific, Southwest	Marine fish	Pagrus auratus (Forster, 1801)	Silver seabream	3.6	25073.1	777	840	790	943	1011	1022	1085	950	667	703	990	1264	1326	535	474	380	590	588	523	403	324	318	272	1618	993	811	573	492	328	413	296	215	145	244	275	301	307	241	205
Australia	AUS	Capture	Silver seabream	Silver seabream	Pacific, Western Central	Marine fish	Pagrus auratus (Forster, 1801)	Silver seabream	3.6	13337.5	93	158	153	129	138	114	0	0	0	0	0	0	0	189	291	372	634	570	1181	783	644	649	872	395	303	395	353	357	391	491	518	513	554	465	95	77	65	171	106
Australia	AUS	Capture	Silver warehou	Silver warehou	Indian Ocean, Eastern	Marine fish	Seriolella punctata (Forster, 1801)	Silver warehou	3.5	21344.4	0	0	0	0	0	0	0	0	0	0	0	0	0	0	0	0	0	0	0	0	0	0	0	0	0	0	0	0	3392	2787	2586	2408	1774	1630	1251	1299	1033	787	562
Australia	AUS	Capture	Silver warehou	Silver warehou	Pacific, Southwest	Marine fish	Seriolella punctata (Forster, 1801)	Silver warehou	3.5	792	0	0	0	0	0	0	0	0	0	0	0	0	0	0	0	0	0	0	0	0	0	0	0	0	0	0	0	0	0	0	0	0	0	0	212	170	157	143	71
Australia	AUS	Capture	Skipjack tuna	Skipjack tuna	Indian Ocean, Eastern	Marine fish	Katsuwonus pelamis (Linnaeus, 1758)	Skipjack tuna	4.4	22142.2	404	68	49	58	37	44	307	67	10	136	635	947	81	12	639	761	334	29	1204	466	212	905	2247	4986	2995	1040	1145	2	30	3	446	90	892	855	0.01	0.08	0.79	0.59	0.06
Australia	AUS	Capture	Skipjack tuna	Skipjack tuna	Pacific, Southwest	Marine fish	Katsuwonus pelamis (Linnaeus, 1758)	Skipjack tuna	4.4	55412.5	529	91	403	50	39	352	357	223	209	140	77	87	634	997	4435	6483	7694	5431	3519	4312	2755	4693	1293	4397	3995	1091	221	16	780	1	48	4	1	8	3	1	2	5.96	3.59
Australia	AUS	Capture	Skipjack tuna	Skipjack tuna	Pacific, Western Central	Marine fish	Katsuwonus pelamis (Linnaeus, 1758)	Skipjack tuna	4.4	165	0	0	0	0	0	0	0	0	0	0	0	0	0	0	0	0	0	0	0	0	0	4	2	1	1	1	1	1	1	0	9	65	8	22	4	2	4	3	2
Australia	AUS	Capture	Smooth oreo dory	Smooth oreo dory	Indian Ocean, Eastern	Marine fish	Pseudocyttus maculatus Gilchrist, 1906	Smooth oreo dory	3.6	239.16	0	0	0	0	0	0	0	0	0	0	0	0	0	0	0	0	0	0	0	0	0	0	0	0	0	0	0	0	0	0	0	0	0	2	2	4	2	1	0
Australia	AUS	Capture	Smooth oreo dory	Smooth oreo dory	Pacific, Southwest	Marine fish	Pseudocyttus maculatus Gilchrist, 1906	Smooth oreo dory	3.6	1275	0	0	0	0	0	0	0	0	0	0	0	0	0	0	0	0	0	0	0	0	0	505	420	106	123	13	6	6	22	74	0	0	0	0	0	0	0	0	0
Australia	AUS	Capture	Snappers, jobfishes nei	Snapper, jobfish	Indian Ocean, Eastern	Marine fish	C249	Snapper and jobfish	3.975	58566.2	3	34	9	17	28	25	23	32	59	62	87	111	116	97	123	120	266	363	2977	533	660	952	1019	1834	2717	2943	3235	3213	3388	3736	3681	3270	3256	1822	1739	1741	1739	1684	1502
Australia	AUS	Capture	Snappers, jobfishes nei	Snapper, jobfish	Pacific, Southwest	Marine fish	C250	Snapper and jobfish	3.9814	2928	0	0	0	0	0	0	0	0	0	0	0	0	0	0	0	0	0	0	0	0	0	0	0	301	293	311	216	212	256	243	252	260	332	252	0	0	0	0	0
Australia	AUS	Capture	Snappers, jobfishes nei	Snapper, jobfish	Pacific, Western Central	Marine fish	C251	Snapper and jobfish	3.96818	54440.8	65	77	39	56	56	0	1	2	4	4	6	7	7	6	8	8	1	16	647	496	460	734	771	722	1401	1760	1961	1864	1169	1742	1706	2011	2985	2326	2330	1649	1872	3336	3373
Australia	AUS	Capture	Snoek	Snoek	Indian Ocean, Eastern	Marine fish	Thyrsites atun (Euphrasen, 1791)	Snoek	3.6	7225.18	143	375	323	109	53	56	36	28	151	159	224	286	300	251	319	320	371	370	370	400	400	300	200	88	120	154	161	110	98	110	415	70	63	77	58	53	47	17	6
Australia	AUS	Capture	Snoek	Snoek	Pacific, Southwest	Marine fish	Thyrsites atun (Euphrasen, 1791)	Snoek	3.6	6177	40	44	63	77	114	143	115	145	224	236	332	424	445	372	473	470	500	400	400	450	450	0	0	14	21	29	9	19	40	43	27	19	14	11	8	3	1	2	0
Australia	AUS	Capture	Southern blue whiting	Southern blue whiting	Atlantic, Southwest	Marine fish	Micromesistius australis Norman, 1937	Southern blue whiting	3.3	188	0	0	0	0	0	0	0	0	0	0	0	0	0	0	0	0	0	0	0	0	0	0	23	165	0	0	0	0	0	0	0	0	0	0	0	0	0	0	0
Australia	AUS	Capture	Southern bluefin tuna	Southern bluefin tuna	Indian Ocean, Eastern	Marine fish	Thunnus maccoyii (Castelnau, 1872)	Southern bluefin tuna	3.9	289350	6820	12000	7180	6490	8180	13220	19630	16340	12862	12019	11951	10271	10041	5678	4166	4089	2184	2152	2499	3362	4894	4911	4353	5448	4629	5463	4929	5618	5180	5332	5852	4822	4431	4884	4039.04	4115.32	4444.41	4561.37	4189.43
Australia	AUS	Capture	Southern bluefin tuna	Southern bluefin tuna	Pacific, Southwest	Marine fish	Thunnus maccoyii (Castelnau, 1872)	Southern bluefin tuna	3.9	43279.5	1563	569	5010	4293	3015	3623	1871	1355	549	570	580	550	550	440	420	400	2974	2743	2198	2270	623	1028	471	355	74	98	41	27	55	201	30	8	15	224	160.81	84.78	58.17	340.58	369.15
Australia	AUS	Capture	Southern meagre(=Mulloway)	Southern meagre	Indian Ocean, Eastern	Marine fish	Argyrosomus hololepidotus (Lacepède, 1801)	Southern meagre	4.5	5217.24	114	112	84	80	59	65	51	59	76	80	113	144	151	126	160	160	24	22	26	26	44	44	44	96	286	363	368	305	272	268	254	211	151	35	28	20	68	108	69
Australia	AUS	Capture	Southern meagre(=Mulloway)	Southern meagre	Pacific, Southwest	Marine fish	Argyrosomus hololepidotus (Lacepède, 1801)	Southern meagre	4.5	6163.39	285	330	291	254	249	304	274	232	167	176	248	317	333	119	154	150	147	148	140	140	95	88	91	94	79	73	70	74	102	54	58	46	48	36	55	84	79.06	78.46	57.78
Australia	AUS	Capture	Southern meagre(=Mulloway)	Southern meagre	Pacific, Western Central	Marine fish	Argyrosomus hololepidotus (Lacepède, 1801)	Southern meagre	4.5	4530.92	44	51	55	58	48	0	0	0	0	0	0	0	0	0	0	0	0	0	54	45	44	45	48	49	93	142	413	180	232	308	248	240	222	225	215	165	167	184	158
Australia	AUS	Capture	Spiky oreo	Spiky oreo	Indian Ocean, Eastern	Marine fish	Neocyttus rhomboidalis Gilchrist, 1906	Spiky oreo	3.6	254	0	0	0	0	0	0	0	0	0	0	0	0	0	0	0	0	0	0	0	0	0	0	0	0	0	0	0	0	0	0	0	0	0	24	72	87	71	0	0
Australia	AUS	Capture	Spiky oreo	Spiky oreo	Pacific, Southwest	Marine fish	Neocyttus rhomboidalis Gilchrist, 1906	Spiky oreo	3.6	1418	0	0	0	0	0	0	0	0	0	0	0	0	0	0	0	0	0	0	0	0	0	448	620	89	86	31	67	63	12	1	0	1	0	0	0	0	0	0	0
Australia	AUS	Capture	Argentine shortfin squid	Squid	Atlantic, Southwest	Cephalopod	Cephalopod	Cephalopod	3	167	0	0	0	0	0	0	0	0	0	0	0	0	0	0	0	0	0	0	0	0	0	0	0	167	0	0	0	0	0	0	0	0	0	0	0	0	0	0	0
Australia	AUS	Capture	Cuttlefish, bobtail squids nei	Squid	Indian Ocean, Eastern	Cephalopod	Cephalopod	Cephalopod	3	1972.21	1	1	1	5	2	3	7	13	18	19	27	34	36	33	33	21	12	28	42	50	56	56	56	62	32	48	46	29	46	99	89	63	58	84	60	76	81	92	114
Australia	AUS	Capture	Cuttlefish, bobtail squids nei	Squid	Pacific, Southwest	Cephalopod	Cephalopod	Cephalopod	3	8210.53	17	17	27	85	139	138	134	151	143	151	213	272	285	177	183	186	334	328	392	392	378	374	251	381	261	249	267	308	382	296	203	115	127	84	93	96	78	49	64
Australia	AUS	Capture	Cuttlefish, bobtail squids nei	Squid	Pacific, Western Central	Cephalopod	Cephalopod	Cephalopod	3	171.02	1	1	0	1	3	5	0	0	0	0	0	0	0	0	0	0	5	3	3	5	4	6	6	8	9	7	6	5	7	7	10	5	4	4	5	4	3	4	5
Australia	AUS	Capture	Patagonian squid	Squid	Atlantic, Southwest	Cephalopod	Cephalopod	Cephalopod	3	5684	0	0	0	0	0	0	0	0	0	0	0	0	0	0	0	0	0	0	0	0	0	0	3198	2486	0	0	0	0	0	0	0	0	0	0	0	0	0	0	0
Australia	AUS	Capture	Various squids nei	Squid	Indian Ocean, Eastern	Cephalopod	Cephalopod	Cephalopod	3	64553.4	83	216	263	385	463	354	666	608	770	811	1143	1459	1531	522	668	517	685	840	1315	2111	930	2657	1083	2745	1816	3272	1728	2841	3693	2907	1749	2878	1231	1534	1272	1834	2706	2591	807
Australia	AUS	Capture	Various squids nei	Squid	Pacific, Southwest	Cephalopod	Cephalopod	Cephalopod	3	21180.3	33	55	85	225	434	462	396	592	645	680	958	1223	1283	800	680	741	1471	1722	1454	1577	787	186	92	384	664	392	207	342	557	459	478	315	281	71	56	36	46	42	38
Australia	AUS	Capture	Various squids nei	Squid	Pacific, Western Central	Cephalopod	Cephalopod	Cephalopod	3	9287.25	91	87	125	119	216	229	208	244	74	78	110	140	147	223	186	227	212	211	172	133	167	508	442	512	290	622	414	244	220	264	185	295	69	103	152	104	157	146	143
Australia	AUS	Capture	Striped marlin	Striped marlin	Indian Ocean, Eastern	Marine fish	Kajikia audax (Philippi, 1887)	Striped marlin	4.5	187.45	0	0	0	0	0	0	0	0	0	0	0	0	0	42	0	1	0	3	9	7	3	17	12	62	3	0	1	0	0	4	6	4	2	0	0.46	0.66	2.48	2.03	0.59
Australia	AUS	Capture	Striped marlin	Striped marlin	Pacific, Southwest	Marine fish	Kajikia audax (Philippi, 1887)	Striped marlin	4.5	5895.22	0	0	0	0	0	0	0	0	0	0	0	32	38	3	33	16	11	13	27	43	69	99	223	245	307	363	353	357	348	234	267	111	114	142	129	122	310.46	255.56	249.43
Australia	AUS	Capture	Striped marlin	Striped marlin	Pacific, Western Central	Marine fish	Kajikia audax (Philippi, 1887)	Striped marlin	4.5	6116	0	0	0	0	0	0	0	0	0	0	0	33	38	3	33	16	11	14	27	44	69	99	224	245	209	354	416	275	226	176	214	267	248	273	247	286	262	251	274
Australia	AUS	Capture	Swordfish	Swordfish	Indian Ocean, Eastern	Marine fish	Xiphias gladius Linnaeus, 1758	Swordfish	4.5	13734	0	0	0	0	0	0	0	0	0	0	0	0	0	37	0	3	32	189	115	62	22	43	337	1360	1798	2900	1344	1766	370	301	335	301	142	349	349.42	189.92	209.27	203.53	211.57
Australia	AUS	Capture	Swordfish	Swordfish	Pacific, Southwest	Marine fish	Xiphias gladius Linnaeus, 1758	Swordfish	4.5	20992.1	0	0	0	0	0	0	0	0	0	0	0	7	7	7	12	30	25	17	19	35	320	1063	1280	1403	1144	789	1167	1397	1091	938	633	73	95	159	124	121	1254.03	1064.6	1197.42
Australia	AUS	Capture	Swordfish	Swordfish	Pacific, Western Central	Marine fish	Xiphias gladius Linnaeus, 1758	Swordfish	4.5	23676	0	0	0	0	0	0	0	0	0	0	0	7	6	7	11	29	24	16	19	34	319	1063	1280	1403	933	1064	1170	779	577	698	771	1144	1138	1133	942	916	1157	1062	1183
Australia	AUS	Capture	Tadpole codling	Tadpole codling	Atlantic, Southwest	Marine fish	Salilota australis (Günther, 1878)	Tadpole codling	4.4	145	0	0	0	0	0	0	0	0	0	0	0	0	0	0	0	0	0	0	0	0	0	0	85	60	0	0	0	0	0	0	0	0	0	0	0	0	0	0	0
Australia	AUS	Capture	Threadfins, tasselfishes nei	Threadfin	Indian Ocean, Eastern	Marine fish	C285	Threadfin	3.8	2463	16	8	25	14	14	20	34	116	101	106	149	190	199	166	211	210	61	193	42	255	333	0	0	0	0	0	0	0	0	0	0	0	0	0	0	0	0	0	0
Australia	AUS	Capture	Threadfins, tasselfishes nei	Threadfin	Pacific, Western Central	Marine fish	C286	Threadfin	3.77	32960.2	246	437	571	851	647	646	573	522	519	547	771	984	1033	863	1098	1000	28	28	475	385	573	216	272	914	1013	1116	1122	931	1151	1039	958	1057	1053	1045	1026	995	1121	940	743
Australia	AUS	Capture	Tope shark	Tope shark	Indian Ocean, Eastern	Marine fish	Galeorhinus galeus (Linnaeus, 1758)	Tope shark	4.3	6314.3	0	0	0	0	0	0	0	0	0	0	0	0	0	0	0	0	0	0	0	0	0	0	0	0	498	325	350	329	349	287	329	276	399	354	308	328	238	200	296
Australia	AUS	Capture	Trumpeters nei	Trumpeter	Indian Ocean, Eastern	Marine fish	C307	Trumpeter	3.76	1026.84	0	0	0	0	0	0	0	0	0	0	0	0	0	0	0	0	0	1	0	0	0	0	0	153	139	77	70	65	66	47	49	63	39	32	31	20	33	30	21
Australia	AUS	Capture	Trumpeters nei	Trumpeter	Pacific, Southwest	Marine fish	C307	Trumpeter	3.76	393	2	1	3	8	10	9	13	13	12	13	18	23	24	20	25	25	10	7	16	16	20	15	34	8	9	13	8	6	9	1	1	0	1	0	0	0	0	0	0
Australia	AUS	Capture	Tuna-like fishes nei	Tuna, bonito	Indian Ocean, Eastern	Marine fish	C312	Tuna and bonito	4.45385	652.31	16	21	8	9	1	1	4	1	1	20	20	15	0	101	0	7	36	19	40	24	16	9	116	34	8	12	83	15	0	3	1	2	0	2	1.92	0.68	0.89	0.39	0.38
Australia	AUS	Capture	Tuna-like fishes nei	Tuna, bonito	Pacific, Southwest	Marine fish	C312	Tuna and bonito	4.45385	2076	0	0	0	0	0	0	0	0	0	0	0	0	0	0	0	0	0	0	0	0	289	281	328	0	219	159	116	138	199	162	185	0	0	0	0	0	0	0	0
Australia	AUS	Capture	Tuna-like fishes nei	Tuna, bonito	Pacific, Western Central	Marine fish	C313	Tuna and bonito	4.45714	295.06	0	0	0	0	0	0	50	5	90	0	0	0	0	0	0	0	0	0	0	0	0	0	0	0	10	13	6	7	8	13	12	0	0	4	6	7	11	11	6
Australia	AUS	Capture	Unicorn icefish	Unicorn icefish	Indian Ocean, Antarctic	Marine fish	Channichthys rhinoceratus Richardson, 1844	Unicorn icefish	3.3	1024.77	0	0	0	0	0	0	0	0	0	0	0	0	0	0	0	0	0	1	0	0	0	4	5	1	2	1	3	21	14	34	33	15	37	51	80.09	26.05	67.71	95.43	99.24
Australia	AUS	Capture	Wahoo	Wahoo	Pacific, Southwest	Marine fish	Acanthocybium solandri (Cuvier, 1832)	Wahoo	4.3	303.6	0	0	0	0	0	0	0	0	0	0	0	0	0	0	0	0	0	0	0	0	0	0	0	0	3	1	2	3	2	2	2	1	0	43	36	36	19	20	23
Australia	AUS	Capture	Wahoo	Wahoo	Pacific, Western Central	Marine fish	Acanthocybium solandri (Cuvier, 1832)	Wahoo	4.3	213.01	0	0	0	0	0	0	0	0	0	0	0	0	0	0	0	0	0	0	0	0	0	0	0	0	8	9	13	29	16	9	26	67	36	0	0	0	0	0	0
Australia	AUS	Capture	Warehou nei	Warehou	Indian Ocean, Eastern	Marine fish	C315	Warehou	3.6	42896	0	0	0	0	0	0	0	0	0	0	0	0	0	0	0	2812	2458	2242	2603	2558	3406	4020	3356	3327	3449	4192	4008	4465	0	0	0	0	0	0	0	0	0	0	0
Australia	AUS	Capture	Scorpionfishes, redfishes nei	Weedy stingfish	Pacific, Southwest	Marine fish	Scorpaenopsis cirrosa (Thunberg, 1793)	Weedy stingfish	4.2	1785	0	0	0	0	0	0	0	0	0	0	0	0	0	0	0	0	0	0	0	0	316	349	371	356	60	29	36	265	0	1	1	1	0	0	0	0	0	0	0
Australia	AUS	Capture	White trevally	White trevally	Indian Ocean, Eastern	Marine fish	Pseudocaranx dentex (Bloch & Schneider, 1801)	White trevally	3.9	1878.02	0	0	0	0	0	0	0	0	0	0	0	0	0	0	0	0	0	0	0	0	0	0	0	0	38	26	19	14	81	114	115	48	65	165	249	230	197	96	153
Australia	AUS	Capture	White trevally	White trevally	Pacific, Southwest	Marine fish	Pseudocaranx dentex (Bloch & Schneider, 1801)	White trevally	3.9	8014.92	0	0	0	0	0	0	0	0	0	0	0	0	0	0	0	0	0	0	0	0	964	872	558	479	380	413	459	493	706	606	390	324	220	99	119	101	152	168	168
Australia	AUS	Capture	Whitson's grenadier	Whitson's grenadier	Indian Ocean, Antarctic	Marine fish	Macrourus whitsoni (Regan, 1913)	Whitson's grenadier	3.5	132.11	0	0	0	0	0	0	0	0	0	0	0	0	0	0	0	0	0	0	0	0	0	0	0	0	0	0	0	0	0	36	1	3	67	0	0.87	8.96	0.34	2.82	1.5
Australia	AUS	Capture	Wrasses, hogfishes, etc. nei	Wrasse, hogfish	Indian Ocean, Eastern	Marine fish	C320	Wrasse and hogfish	3.53548	4621.5	39	44	49	125	82	58	77	74	101	106	149	190	199	166	211	210	46	75	105	121	77	77	77	98	85	88	90	72	141	164	148	189	104	90	111	73	86	77	84
Australia	AUS	Capture	Wrasses, hogfishes, etc. nei	Wrasse, hogfish	Pacific, Western Central	Marine fish	C321	Wrasse and hogfish	3.53929	228.8	13	13	14	20	16	1	0	0	1	1	1	1	1	1	2	2	0	0	0	0	0	0	0	0	0	1	0	0	1	22	16	0	1	0	0	22	14	12	11
Australia	AUS	Capture	Yellowfin tuna	Yellowfin tuna	Indian Ocean, Eastern	Marine fish	Thunnus albacares (Bonnaterre, 1788)	Yellowfin tuna	4.4	5083.95	0	3	15	28	34	20	8	18	41	43	42	40	12	216	80	23	14	91	647	263	107	305	275	478	439	572	362	196	154	37	46	33	17	13	22.49	15.29	24.13	40.81	19.39
Australia	AUS	Capture	Yellowfin tuna	Yellowfin tuna	Pacific, Southwest	Marine fish	Thunnus albacares (Bonnaterre, 1788)	Yellowfin tuna	4.4	38307.3	190	46	60	84	151	280	122	101	110	116	114	1163	950	1646	2010	2308	1361	1291	1293	1322	1743	1109	1243	958	802	896	1111	1716	1432	997	601	573	740	629	569	902	640	468	434
Australia	AUS	Capture	Yellowfin tuna	Yellowfin tuna	Pacific, Western Central	Marine fish	Thunnus albacares (Bonnaterre, 1788)	Yellowfin tuna	4.4	29297	0	0	0	0	0	0	0	0	0	0	0	0	0	0	0	0	0	0	0	0	0	627	593	1226	498	1031	1356	1679	1004	958	781	1227	910	1029	1359	1870	1264	1342	1688
Australia	AUS	Capture	Yellowtail amberjack	Yellowtail amberjack	Indian Ocean, Eastern	Marine fish	Seriola lalandi Valenciennes, 1833	Yellowtail amberjack	4.2	232.29	0	0	0	0	0	0	0	0	0	0	0	0	0	0	0	0	0	0	0	0	0	0	0	0	0	0	0	0	0	0	0	0	0	17	18	45	62	28	22
Australia	AUS	Capture	Yellowtail amberjack	Yellowtail amberjack	Pacific, Southwest	Marine fish	Seriola lalandi Valenciennes, 1833	Yellowtail amberjack	4.2	13478.7	310	303	213	278	237	263	328	388	610	643	906	1157	1214	1015	1291	800	401	401	347	348	194	84	76	13	14	5	32	1	1	1	22	1	25	133	266	243	245	124	108
Australia	AUS	Capture	Demersal percomorphs nei	Demersal percomorph	Indian Ocean, Eastern	Marine fish	Demersal percomorph	Demersal percomorph	4	21496.7	394	344	616	230	303	322	206	154	329	347	489	624	655	547	696	700	2300	2300	2000	3000	2500	0	0	0	0	0	0	0	0	0	0	0	0	246	230	251	258	229	215
Australia	AUS	Capture	Demersal percomorphs nei	Demersal percomorph	Pacific, Southwest	Marine fish	Demersal percomorph	Demersal percomorph	4	40788	928	1421	1003	1665	2622	2493	2371	2044	2182	2299	3239	4135	4339	1307	1240	1000	2000	1500	2000	1000	0	0	0	0	0	0	0	0	0	0	0	0	0	0	0	0	0	0	0
Australia	AUS	Capture	Demersal percomorphs nei	Demersal percomorph	Pacific, Western Central	Marine fish	Demersal percomorph	Demersal percomorph	4	737.49	21	0	0	4	0	0	0	0	0	0	0	0	0	0	0	0	96	96	100	100	100	0	0	0	0	0	0	0	0	0	0	0	0	0	0	29	24	20	18
Australia	AUS	Aquaculture	Atlantic salmon	Atlantic salmon	Indian Ocean, Eastern	Marine fish	Salmo salar Linnaeus, 1758	Atlantic salmon	4.5	715240	0	0	0	0	0	0	0	0	0	0	10	53	240	1750	1750	2650	3300	3500	4000	6192	7647	7648	7069	9195	10907	12724	14356	15208	16476	16780	20710	25336	25736.9	29893	31806.8	36662	43982	42825	41590.7
Australia	AUS	Aquaculture	Barramundi(=Giant seaperch)	Barramundi	Indian Ocean, Eastern	Marine fish	Lates calcarifer (Bloch, 1790)	Barramundi	3.8	7619.25	0	0	0	0	0	0	0	0	0	0	0	0	0	0	0	0	0	0	0	0	0	0	0	0	0	0	0	0	0	0	0	0	0	455	432.97	862.47	1126.56	1190.45	699.23
Australia	AUS	Aquaculture	Barramundi(=Giant seaperch)	Barramundi	Oceania - Inland waters	Freshwater fish	Lates calcarifer (Bloch, 1790)	Barramundi	3.8	127	0	0	0	0	0	0	0	0	0	0	2	1	6	8	18	47	45	0	0	0	0	0	0	0	0	0	0	0	0	0	0	0	0	0	0	0	0	0	0
Australia	AUS	Aquaculture	Barramundi(=Giant seaperch)	Barramundi	Pacific, Southwest	Marine fish	Lates calcarifer (Bloch, 1790)	Barramundi	3.8	714.87	0	0	0	0	0	0	0	0	0	0	0	0	0	0	0	0	0	0	0	0	0	0	0	0	0	0	0	0	0	0	0	0	0	111	86	75	50	50	59
Australia	AUS	Aquaculture	Barramundi(=Giant seaperch)	Barramundi	Pacific, Western Central	Marine fish	Lates calcarifer (Bloch, 1790)	Barramundi	3.8	54218.6	0	0	0	0	0	0	0	0	0	0	0	0	16	10	15	47	100	219	312	258	596	487	683	775	822	898	1150	1750	1517	1775	2249	2632	3361.8	2400	3109	3415	3296.74	2319.1	2681.6
Australia	AUS	Aquaculture	Finfishes nei	Finfishes	Indian Ocean, Eastern	Marine fish	Weighted mean	Finfishes	4.36607	6084.48	0	0	0	0	0	0	0	0	0	0	0	0	0	0	0	0	0	0	0	0	0	0	0	0	0	0	0	0	0	0	0	1116	1892.4	1402.31	1634.62	4.6	33.84	0.71	0
Australia	AUS	Aquaculture	Finfishes nei	Finfishes	Pacific, Southwest	Marine fish	Weighted mean	Finfishes	4.36607	132	0	0	0	0	0	0	0	0	0	0	0	0	0	0	0	0	0	0	0	0	0	0	0	0	0	0	0	0	0	0	0	0	0	47	85	0	0	0	0
Australia	AUS	Aquaculture	Finfishes nei	Finfishes	Pacific, Western Central	Marine fish	Weighted mean	Finfishes	4.36607	233	0	0	0	0	0	0	0	0	0	0	0	0	0	0	0	0	0	0	0	0	0	0	0	0	0	0	0	0	0	0	0	0	0	101	132	0	0	0	0
Australia	AUS	Aquaculture	Freshwater fishes nei	Freshwater fish	Oceania - Inland waters	Freshwater fish	Weighted mean	Freshwater fish	3.89278	7674.67	0	0	0	0	0	0	0	0	0	0	0	0	0	0	0	0	0	0	0	0	0	94	48	114	42	26	111	249	257	152	127	203	189	610.1	659.41	387.54	390.66	530	440.33
Australia	AUS	Aquaculture	Giant tiger prawn	Prawn	Pacific, Southwest	Crustacean	Crustacean	Crustacean	2.5	21411	0	0	0	0	0	0	0	0	0	0	10	0	88	160	577	184	898	1097	1493	1613	1412	1278	1278	2319	2505	2558	3406	0	0	294	241	0	0	0	0	0	0	0	0
Australia	AUS	Aquaculture	Giant tiger prawn	Prawn	Pacific, Western Central	Crustacean	Crustacean	Crustacean	2.5	1062	0	0	0	0	0	0	0	0	0	0	11	19	108	300	0	624	0	0	0	0	0	0	0	0	0	0	0	0	0	0	0	0	0	0	0	0	0	0	0
Australia	AUS	Aquaculture	Golden perch	Golden perch	Oceania - Inland waters	Freshwater fish	Macquaria ambigua (Richardson, 1845)	Golden perch	3.7	145.06	0	0	0	0	0	0	0	0	0	0	0	0	0	0	10	60	11	12	8	8	8	1	1	1	2	2	1	8	2	4	2	0	0	0	0	0	0	0	0
Australia	AUS	Aquaculture	Kuruma prawn	Prawn	Pacific, Southwest	Crustacean	Crustacean	Crustacean	2.5	1714	0	0	0	0	0	0	0	0	0	0	0	0	2	0	0	0	5	22	33	35	216	115	115	154	404	262	351	0	0	0	0	0	0	0	0	0	0	0	0
Australia	AUS	Aquaculture	Marine fishes nei	Marine fish	Indian Ocean, Eastern	Marine fish	Weighted mean	Marine fish	4.36607	37537.1	0	0	0	0	0	0	0	0	0	0	0	0	0	0	0	0	0	0	0	0	0	95	47	229	82	186	158	1531	1409	2500	2455	2137	2073.6	3397.16	3796.94	3620.31	1504.1	889	579
Australia	AUS	Aquaculture	Murray cod	Murray cod	Oceania - Inland waters	Freshwater fish	Maccullochella peelii (Mitchell, 1838)	Murray cod	4.2	864.36	0	0	0	0	0	0	0	0	0	0	0	0	0	0	0	0	11	10	18	0	1	1	1	2	8	4	8	0	20	34	55	65	0	0	0	0	0	0	0
Australia	AUS	Aquaculture	Penaeus shrimps nei	Shrimp	Pacific, Southwest	Crustacean	Crustacean	Crustacean	2.5	2723.46	0	0	0	0	0	0	0	0	0	0	0	0	0	0	0	0	0	0	0	0	0	0	0	0	0	0	0	0	0	0	0	0	0	164	165	148	270	223	287
Australia	AUS	Aquaculture	Penaeus shrimps nei	Shrimp	Pacific, Western Central	Crustacean	Crustacean	Crustacean	2.5	65307.1	0	0	0	0	0	0	0	0	0	0	0	0	0	0	0	0	0	0	0	0	0	0	0	0	0	0	0	3365	3723	2964	3300	3284	3088	3821	5115	3822	3751.13	3518.7	3487
Australia	AUS	Aquaculture	Rainbow trout	Rainbow trout	Oceania - Inland waters	Freshwater fish	Oncorhynchus mykiss (Walbaum, 1792)	Rainbow trout	4.1	34324.3	141	273	400	524	643	758	870	978	951	974	524	1020	1443	1368	1185	1272	1778	1577	1750	1739	1894	2083	2109	1646	1887	1948	1864	18	40	284	249	49	13.3	11.7	7.53	11.03	4.2	4.27	2.71
Australia	AUS	Aquaculture	Rainbow trout	Rainbow trout	Pacific, Southwest	Marine fish	Oncorhynchus mykiss (Walbaum, 1792)	Rainbow trout	4.1	3880	0	0	0	0	0	0	0	0	0	0	46	207	890	750	750	437	400	400	0	0	0	0	0	0	0	0	0	0	0	0	0	0	0	0	0	0	0	0	0
Australia	AUS	Aquaculture	Red claw crayfish	Crayfish	Oceania - Inland waters	Crustacean	Crustacean	Crustacean	2.5	2277.63	0	0	0	0	0	0	0	0	0	0	0	0	7	166	32	33	40	41	35	42	56	64	64	78	71	87	75	375	91	99	105	100	67	68	57	52	41.43	40.9	35.5
Australia	AUS	Aquaculture	Sea trout	Sea trout	Oceania - Inland waters	Freshwater fish	Salmo trutta Linnaeus, 1758	Sea trout	3.4	2231.7	0	0	0	0	0	0	0	0	0	13	21	2	2	2	2	2	0	0	0	0	0	0	0	0	0	0	0	0	0	0	0	0	0	143	150	168	165	198	253
Australia	AUS	Aquaculture	Short-finned eel	Short-finned eel	Indian Ocean, Eastern	Marine fish	Anguilla australis Richardson, 1841	Short-finned eel	4.3	2865	0	0	0	0	0	0	0	0	44	45	50	50	50	50	64	200	245	200	265	200	201	315	315	107	47	71	44	32	8	8	8	141	105	0	0	0	0	0	0
Australia	AUS	Aquaculture	Silver perch	Silver perch	Oceania - Inland waters	Freshwater fish	Bidyanus bidyanus (Mitchell, 1838)	Silver perch	3	6936.97	0	0	0	0	0	0	0	0	0	0	0	0	0	0	2	10	22	40	9	21	33	115	162	195	271	285	322	345	295	332	362	348	292.9	296.5	321.24	371.99	278.71	256.46	310.25
Australia	AUS	Aquaculture	Smooth marron crayfish	Crayfish	Oceania - Inland waters	Crustacean	Crustacean	Crustacean	2.5	1620.78	0	0	0	0	0	0	0	0	8	4	8	10	3	7	14	15	17	19	21	21	32	52	55	49	54	60	58	68	68	77	64	89	80	75.9	77.1	88.32	62.47	62.66	59.79
Australia	AUS	Aquaculture	Southern bluefin tuna	Southern bluefin tuna	Indian Ocean, Eastern	Marine fish	Thunnus maccoyii (Castelnau, 1872)	Southern bluefin tuna	3.9	126937	0	0	0	0	0	0	0	0	0	0	0	0	0	0	0	0	335	636	1275	1927	2013	2089	1652	1373	2649	3889	4008	2373	4554	2231	3611	2139	4532	8785.63	7283.53	5800	7087	7486	7544
Australia	AUS	Aquaculture	Speckled longfin eel	Speckled longfin eel	Oceania - Inland waters	Freshwater fish	Anguilla reinhardtii Steindachner, 1867	Speckled longfin eel	3.6	155.13	0	0	0	0	0	0	0	0	0	0	0	0	0	0	0	0	0	0	0	0	0	0	0	0	0	0	0	0	0	0	0	0	0	0	0	63	72.13	0	0
Australia	AUS	Aquaculture	Yabby crayfish	Crayfish	Oceania - Inland waters	Crustacean	Crustacean	Crustacean	2.5	3709.31	0	0	0	0	0	0	0	0	0	1	1	3	9	31	63	87	114	149	336	273	161	188	230	245	284	276	172	121	114	120	91	110	84	60	56.67	41.71	40.42	37.33	33.91
Austria	AUT	Capture	Common carp	Common carp	Europe - Inland waters	Freshwater fish	Cyprinus carpio Linnaeus, 1758	Common carp	3.1	2240	0	0	0	0	400	500	650	400	100	150	40	0	0	0	0	0	0	0	0	0	0	0	0	0	0	0	0	0	0	0	0	0	0	0	0	0	0	0	0
Austria	AUT	Capture	Freshwater fishes nei	Freshwater fish	Europe - Inland waters	Freshwater fish	Weighted mean	Freshwater fish	3.1	21365	970	870	800	700	700	700	750	700	600	550	600	600	600	550	533	500	479	420	388	404	450	465	451	432	439	362	350	372	400	370	360	350	350	350	350	350	300	350	350
Austria	AUT	Aquaculture	Arctic char	Arctic char	Europe - Inland waters	Freshwater fish	Salvelinus alpinus (Linnaeus, 1758)	Arctic char	4.4	2076.78	0	0	0	0	0	0	0	0	0	0	0	0	0	0	0	0	0	0	0	0	0	0	2	4	2	0	1	0	10	21	16	14	13	44	45	140	120	142	328
Austria	AUT	Aquaculture	Brook trout	Brook trout	Europe - Inland waters	Freshwater fish	Salvelinus fontinalis (Mitchill, 1814)	Brook trout	3.3	7651.45	0	0	0	0	0	0	0	0	0	0	0	0	0	0	0	0	0	0	0	0	0	170	195	191	162	188	188	217	230	246	260	253	257	244	256	393	426	455	431
Austria	AUT	Aquaculture	Common carp	Common carp	Europe - Inland waters	Freshwater fish	Cyprinus carpio Linnaeus, 1758	Common carp	3.1	31395.5	770	900	900	1200	800	600	500	600	1000	1100	1160	1200	1300	1250	1050	1030	1110	1030	990	860	810	540	565	595	620	385	303	337	306	321	346	377	362	345	348	596	590	619	573
Austria	AUT	Aquaculture	Cyprinids nei	Carp	Europe - Inland waters	Freshwater fish	A13	Carp	2.73333	118.5	0	0	0	0	0	0	0	0	0	0	0	0	0	0	0	0	0	0	0	0	0	7	4	20	11	9	5	3	4	2	3	2	4	4	4	8	9	6	4
Austria	AUT	Aquaculture	Grass carp(=White amur)	Grass carp	Europe - Inland waters	Freshwater fish	Ctenopharyngodon idella (Valenciennes, 1844)	Grass carp	2	419.47	0	0	0	0	0	0	0	0	0	0	0	0	0	0	0	0	0	0	0	0	0	18	14	9	8	8	5	8	9	7	15	17	10	11	11	26	21	27	29
Austria	AUT	Aquaculture	Huchen	Huchen	Europe - Inland waters	Freshwater fish	Hucho hucho (Linnaeus, 1758)	Huchen	4.2	127.86	0	0	0	0	0	0	0	0	0	0	0	0	0	0	0	0	0	0	0	0	0	0	0	0	0	0	1	0	1	2	3	4	3	3	5	15	11	7	14
Austria	AUT	Aquaculture	North African catfish	North African catfish	Europe - Inland waters	Freshwater fish	Clarias gariepinus (Burchell, 1822)	North African catfish	3.8	3178	0	0	0	0	0	0	0	0	0	0	0	0	0	0	0	0	0	0	0	0	0	0	0	0	0	0	0	0	0	0	0	0	0	0	0	165	263	290	354
Austria	AUT	Aquaculture	Pike-perch	Pike-perch	Europe - Inland waters	Freshwater fish	Sander lucioperca (Linnaeus, 1758)	Pike-perch	4	115.04	0	0	0	0	0	0	0	0	0	0	0	0	0	0	0	0	0	0	0	0	0	7	3	4	2	3	2	2	2	2	2	2	3	2	3	11	7	6	6.7
Austria	AUT	Aquaculture	Rainbow trout	Rainbow trout	Europe - Inland waters	Freshwater fish	Oncorhynchus mykiss (Walbaum, 1792)	Rainbow trout	4.1	84144.8	620	700	2000	2200	2400	2600	2600	3000	3000	3000	2900	2800	3200	3200	2076	2105	2030	2110	2113	2058	2139	2160	1997	2097	1950	1735	1738	1594	1640	1729	1671	1633	1204	1246	1211	1271	1337	1322	1277
Austria	AUT	Aquaculture	Salmonoids nei	Salmon, trout, char	Europe - Inland waters	Freshwater fish	A32	Salmon and trout and char	3.96667	1083.77	0	0	0	0	0	0	0	0	0	0	0	0	0	0	0	0	0	0	0	0	0	0	3	6	6	3	11	5	10	16	13	51	46	49	36	0	45	40	4.5
Austria	AUT	Aquaculture	Sea trout	Sea trout	Europe - Inland waters	Freshwater fish	Salmo trutta Linnaeus, 1758	Sea trout	3.4	4151.63	0	0	0	0	0	0	0	0	0	0	0	0	0	0	0	0	0	0	0	0	0	70	104	104	61	42	52	53	44	62	68	82	73	81	85	236	267	289	335
Austria	AUT	Aquaculture	Silver carp	Silver carp	Europe - Inland waters	Freshwater fish	Hypophthalmichthys molitrix (Valenciennes, 1844)	Silver carp	2	156.39	0	0	0	0	0	0	0	0	0	0	0	0	0	0	0	0	0	0	0	0	0	6	3	4	4	5	1	2	2	2	2	1	1	1	1	12	13	10	11
Austria	AUT	Aquaculture	Tench	Tench	Europe - Inland waters	Freshwater fish	Tinca tinca (Linnaeus, 1758)	Tench	3.7	150.2	0	0	0	0	0	0	0	0	0	0	0	0	0	0	0	0	0	0	0	0	0	6	6	15	10	5	6	3	3	4	4	4	4	7	5	9	7	12	8.4
Austria	AUT	Aquaculture	Wels(=Som) catfish	Wels catfish	Europe - Inland waters	Freshwater fish	Silurus glanis Linnaeus, 1758	Wels catfish	4.4	579.67	0	0	0	0	0	0	0	0	0	0	0	0	0	0	0	0	0	0	0	0	0	7	4	3	3	1	2	1	2	2	97	91	102	98	151	4	0	0	0
Azerbaijan	AZE	Capture	Freshwater gobies nei	Asian freshwater goby	Asia - Inland waters	Freshwater fish	Synechogobius ommaturus (Richardson, 1845)	Asian freshwater goby	3.8	183	0	0	0	0	0	0	0	0	0	0	0	0	0	0	0	0	0	0	0	0	0	0	0	0	0	0	6	7	8	5	5	10	16	18	14	19	13	17	10
Azerbaijan	AZE	Capture	Asp	Asp	Asia - Inland waters	Freshwater fish	Leuciscus aspius (Linnaeus, 1758)	Asp	4.5	454	0	0	0	0	0	0	0	0	0	0	0	0	6	87	131	51	63	31	14	5	9	6	4	2	1	5	1	4	3	2	2	4	4	1	3	1	2	2	2
Azerbaijan	AZE	Capture	Black and Caspian Sea sprat	Black and Caspian Sea sprat	Asia - Inland waters	Freshwater fish	Clupeonella cultriventris (Nordmann, 1840)	Black and Caspian Sea sprat	3	364274	0	0	0	0	0	0	0	0	0	0	0	0	53327	50420	38821	36470	28100	19323	17254	9651	5828	4420	4043	20460	18520	10389	10950	6073	8897	8637	3667	2450	1020	839	708	485	372	206	164
Azerbaijan	AZE	Capture	Caspian shads	Caspian shad	Asia - Inland waters	Freshwater fish	Alosa caspia (Eichwald, 1838)	Caspian shad	3.5	3416	0	0	0	0	0	0	0	0	0	0	0	0	452	220	252	0	0	150	209	67	75	42	82	60	1	52	24	48	64	60	68	96	108	79	90	152	126	150	247
Azerbaijan	AZE	Capture	Common carp	Common carp	Asia - Inland waters	Freshwater fish	Cyprinus carpio Linnaeus, 1758	Common carp	3.1	4713	0	0	0	0	0	0	0	0	0	0	0	0	0	0	0	0	1188	1446	803	370	84	49	87	92	93	51	10	13	16	17	20	17	16	9	47	6	14	7	38
Azerbaijan	AZE	Capture	Mullets nei	Corsula	Asia - Inland waters	Freshwater fish	Rhinomugil corsula (Hamilton, 1822)	Corsula	2.4	2030	0	0	0	0	0	0	0	0	0	0	0	0	57	80	60	90	66	40	90	73	103	82	61	2	3	55	3	10	14	15	21	62	35	40	62	139	125	125	157
Azerbaijan	AZE	Capture	Crucian carp	Crucian carp	Asia - Inland waters	Freshwater fish	Carassius carassius (Linnaeus, 1758)	Crucian carp	3.1	235	0	0	0	0	0	0	0	0	0	0	0	0	13	0	0	0	0	0	0	0	0	0	0	6	4	17	6	8	7	3	9	10	20	19	12	5	5	5	3
Azerbaijan	AZE	Capture	Freshwater bream	Freshwater bream	Asia - Inland waters	Freshwater fish	Abramis brama (Linnaeus, 1758)	Freshwater bream	3.1	6163	0	0	0	0	0	0	0	0	0	0	0	0	771	610	568	448	518	412	309	219	402	346	314	52	55	127	48	50	43	63	66	75	76	72	68	72	64	59	58
Azerbaijan	AZE	Capture	Freshwater fishes nei	Freshwater fish	Asia - Inland waters	Freshwater fish	Weighted mean	Freshwater fish	3.01597	317	0	0	0	0	0	0	0	0	0	0	0	0	0	145	0	1	2	1	4	25	16	21	13	8	0	0	2	8	13	8	10	19	2	4	7	0	0	0	0
Azerbaijan	AZE	Capture	Kutum	Kutum	Asia - Inland waters	Freshwater fish	Rutilus frisii (Nordmann, 1840)	Kutum	3.6	1260	0	0	0	0	0	0	0	0	0	0	0	0	0	0	0	0	0	0	0	0	0	0	0	0	0	0	16	31	16	18	20	46	50	41	54	82	80	117	162
Azerbaijan	AZE	Capture	Northern pike	Northern pike	Asia - Inland waters	Freshwater fish	Esox lucius Linnaeus, 1758	Northern pike	4.1	728	0	0	0	0	0	0	0	0	0	0	0	0	164	75	31	78	85	82	27	15	7	23	18	21	28	25	6	9	10	8	8	3	4	1	0	0	0	0	0
Azerbaijan	AZE	Capture	Pike-perch	Pike-perch	Asia - Inland waters	Freshwater fish	Sander lucioperca (Linnaeus, 1758)	Pike-perch	4	1136	0	0	0	0	0	0	0	0	0	0	0	0	44	442	13	42	45	33	27	19	22	11	7	5	5	19	17	35	33	41	39	25	27	27	20	30	28	27	9
Azerbaijan	AZE	Capture	Roach	Roach	Asia - Inland waters	Freshwater fish	Rutilus rutilus (Linnaeus, 1758)	Roach	3	2250	0	0	0	0	0	0	0	0	0	0	0	0	185	258	281	81	78	63	53	19	74	89	62	81	8	64	19	26	36	33	32	48	58	39	34	59	63	72	52
Azerbaijan	AZE	Capture	Sichel	Sichel	Asia - Inland waters	Freshwater fish	Pelecus cultratus (Linnaeus, 1758)	Sichel	3.6	113	0	0	0	0	0	0	0	0	0	0	0	0	0	61	52	0	0	0	0	0	0	0	0	0	0	0	0	0	0	0	0	0	0	0	0	0	0	0	0
Azerbaijan	AZE	Capture	Sturgeons nei	Sturgeon	Asia - Inland waters	Freshwater fish	C276	Sturgeon	2.93333	1871	0	0	0	0	0	0	0	0	0	0	0	0	216	120	73	108	98	84	92	76	69	63	61	69	70	76	76	105	89	85	87	73	72	4	2	0	3	0	0
Azerbaijan	AZE	Capture	Tench	Tench	Asia - Inland waters	Freshwater fish	Tinca tinca (Linnaeus, 1758)	Tench	3.7	116	0	0	0	0	0	0	0	0	0	0	0	0	0	39	31	21	18	5	0	0	2	0	0	0	0	0	0	0	0	0	0	0	0	0	0	0	0	0	0
Azerbaijan	AZE	Capture	Wels(=Som) catfish	Wels catfish	Asia - Inland waters	Freshwater fish	Silurus glanis Linnaeus, 1758	Wels catfish	4.4	770	0	0	0	0	0	0	0	0	0	0	0	0	90	160	122	95	78	63	19	6	11	9	8	8	9	8	4	8	8	4	3	4	7	8	4	4	4	4	4
Azerbaijan	AZE	Aquaculture	Common carp	Common carp	Asia - Inland waters	Freshwater fish	Cyprinus carpio Linnaeus, 1758	Common carp	3.1	12845	0	0	0	0	0	0	0	0	0	0	0	0	1072	1091	1011	2106	792	578	416	245	222	163	80	39	0	23	39	78	150	260	345	650	650	650	650	150	138	141	119
Azerbaijan	AZE	Aquaculture	Crucian carp	Crucian carp	Asia - Inland waters	Freshwater fish	Carassius carassius (Linnaeus, 1758)	Crucian carp	3.1	469	0	0	0	0	0	0	0	0	0	0	0	0	0	0	0	0	115	69	27	8	6	9	8	0	0	0	0	0	0	0	0	0	0	0	0	14	12	30	29
Azerbaijan	AZE	Aquaculture	Freshwater bream	Freshwater bream	Asia - Inland waters	Freshwater fish	Abramis brama (Linnaeus, 1758)	Freshwater bream	3.1	577.4	0	0	0	0	0	0	0	0	0	0	0	0	0	0	0	0	0	0	0	0	0	0	0	0	30	33	14	14	9	14	27	18	25	22	18	14	22	20	27
Azerbaijan	AZE	Aquaculture	Freshwater fishes nei	Freshwater fish	Asia - Inland waters	Freshwater fish	Weighted mean	Freshwater fish	2.84257	544	0	0	0	0	0	0	0	0	0	0	0	0	0	0	0	0	27	18	12	7	5	7	4	177	110	34	0	0	5	9	18	28	12	13	13	22	17	6	0
Azerbaijan	AZE	Aquaculture	Grass carp(=White amur)	Grass carp	Asia - Inland waters	Freshwater fish	Ctenopharyngodon idella (Valenciennes, 1844)	Grass carp	2	578	0	0	0	0	0	0	0	0	0	0	0	0	0	0	0	0	16	2	5	2	1	0	0	0	0	0	0	0	20	50	40	70	50	50	50	50	16	11	6
Azerbaijan	AZE	Aquaculture	Pike-perch	Pike-perch	Asia - Inland waters	Freshwater fish	Sander lucioperca (Linnaeus, 1758)	Pike-perch	4	103	0	0	0	0	0	0	0	0	0	0	0	0	0	0	0	0	0	0	0	0	0	0	0	0	0	5	7	8	8	12	7	4	12	14	18	8	0	0	0
Azerbaijan	AZE	Aquaculture	Rainbow trout	Rainbow trout	Asia - Inland waters	Freshwater fish	Oncorhynchus mykiss (Walbaum, 1792)	Rainbow trout	4.1	1402	0	0	0	0	0	0	0	0	0	0	0	0	0	0	0	0	0	0	0	0	0	0	0	0	0	0	0	0	0	0	0	0	0	0	0	0	89	89	89
Azerbaijan	AZE	Aquaculture	Silver carp	Silver carp	Asia - Inland waters	Freshwater fish	Hypophthalmichthys molitrix (Valenciennes, 1844)	Silver carp	2	5900	0	0	0	0	0	0	0	0	0	0	0	0	573	530	205	40	740	534	578	254	185	185	119	0	0	0	20	30	150	150	160	130	250	250	250	250	22	28	35
Bahamas	BHS	Capture	Carangids nei	Amberjack, jack, trevally, scad, pompano	Atlantic, Western Central	Marine fish	C22	Amberjack and jack and trevally and scad and pompano	4.06667	4835.71	181	154	211	218	192	231	165	216	170	99	357	168	132	151	157	114	79	113	106	72	91	103	92	79	81	101	86	92	97	65	79	83	40	84	39	53	44	60	41
Bahamas	BHS	Capture	Black stone crab	Crab	Atlantic, Western Central	Crustacean	Crustacean	Crustacean	2.5	1470	0	0	0	0	0	0	0	0	0	0	0	0	0	0	0	1	16	40	47	40	25	42	39	50	46	47	50	49	51	34	57	31	23	30	57	59	64	74	73
Bahamas	BHS	Capture	Groupers nei	Grouper	Atlantic, Western Central	Marine fish	C89	Grouper	4.09286	14086.4	292	209	297	293	808	601	576	660	558	638	669	729	657	747	490	519	539	618	514	513	475	246	227	193	132	177	170	172	239	107	126	59	102	74	105	97	65	84	114
Bahamas	BHS	Capture	Grunts, sweetlips nei	Grunt, sweetlips	Atlantic, Western Central	Marine fish	C97	Grunt and sweetlips	3.42143	3373.91	138	132	130	120	170	178	168	159	66	172	84	69	124	43	28	14	20	13	9	8	14	67	90	66	62	67	50	72	76	58	63	39	50	125	91	82	64	89	77
Bahamas	BHS	Capture	Hogfish	Hogfish	Atlantic, Western Central	Marine fish	Lachnolaimus maximus (Walbaum, 1792)	Hogfish	4.2	339.65	0	0	0	0	0	0	0	0	0	0	0	0	0	0	0	0	0	0	0	0	0	0	0	0	0	0	0	0	0	0	0	0	0	0	0	38	38	48	60
Bahamas	BHS	Capture	Caribbean spiny lobster	Lobster	Atlantic, Western Central	Crustacean	Crustacean	Crustacean	2.5	284207	1786	2605	2479	2755	2894	2051	2463	2808	3456	5513	3573	4591	5071	6194	5808	7566	8156	7848	7589	7750	7938	7798	7553	8225	9023	7042	10012	10378	9317	9278	8294	6977	6896	7138	9692	8505	9761	6088	6569
Bahamas	BHS	Capture	Marine fishes nei	Marine fish	Atlantic, Western Central	Marine fish	Weighted mean	Marine fish	4.00676	8000.32	102	179	149	147	235	189	327	328	284	264	208	324	291	402	414	382	444	544	428	381	385	264	156	139	110	133	100	105	72	57	86	88	40	48	88	16	15	12	25
Bahamas	BHS	Capture	Nassau grouper	Nassau grouper	Atlantic, Western Central	Marine fish	Epinephelus striatus (Bloch, 1792)	Nassau grouper	4.1	6176.46	0	0	0	0	0	0	0	0	0	0	0	0	0	0	0	0	0	0	665	358	331	514	511	381	226	281	401	422	263	196	208	157	171	199	133	123	75	92	148
Bahamas	BHS	Capture	Snappers nei	Snapper	Atlantic, Western Central	Marine fish	C241	Snapper	4	21011.1	106	185	242	203	376	596	490	502	286	350	557	646	413	277	254	186	228	329	258	297	341	751	781	866	721	777	798	700	648	585	830	568	936	596	643	537	432	551	555
Bahamas	BHS	Capture	Triggerfishes, durgons nei	Triggerfish	Atlantic, Western Central	Marine fish	C302	Triggerfish	3.8	132.14	0	0	0	0	0	0	0	0	0	0	0	0	0	0	0	0	0	0	0	0	0	0	0	0	0	0	0	0	0	0	0	0	0	0	0	24	17	20	22
Bahamas	BHS	Aquaculture	Cobia	Cobia	Atlantic, Western Central	Marine fish	Rachycentron canadum (Linnaeus, 1766)	Cobia	4	155	0	0	0	0	0	0	0	0	0	0	0	0	0	0	0	0	0	0	0	0	0	0	0	0	0	0	0	10	20	30	30	30	20	15	0	0	0	0	0
Bahamas	BHS	Aquaculture	Tilapias nei	Tilapia	America, North - Inland waters	Freshwater fish	A38	Tilapia	2.15714	233	0	0	0	0	0	0	0	0	0	30	30	22	36	55	43	4	5	0	0	0	0	0	0	0	0	0	0	0	0	0	0	0	0	0	1	1	1	1	1
Bahamas	BHS	Aquaculture	Whiteleg shrimp	Shrimp	Atlantic, Western Central	Crustacean	Crustacean	Crustacean	2.5	263	0	0	0	0	0	0	0	0	10	12	12	15	15	10	3	2	5	8	4	24	1	1	1	1	2	13	25	42	7	48	0	0	0	2	0	0	0	0	0
Bangladesh	BGD	Capture	Bombay-duck	Bombay-duck	Indian Ocean, Eastern	Marine fish	Harpadon nehereus (Hamilton, 1822)	Bombay-duck	4.1	726513	0	0	0	0	0	0	0	0	0	0	0	0	0	0	0	0	0	0	0	0	0	0	0	0	0	0	0	0	0	0	0	0	36980	58263	59374	60750	62817	71745	51673
Bangladesh	BGD	Capture	Freshwater crustaceans nei	Crustacean	Asia - Inland waters	Crustacean	Crustacean	Crustacean	2.5	801961	0	0	0	0	0	0	0	0	0	0	0	0	0	0	0	0	0	0	0	0	0	0	0	0	0	0	0	0	0	0	0	0	79315	95008	134300	55132	57688	40338	45928
Bangladesh	BGD	Capture	Marine crustaceans nei	Crustacean	Indian Ocean, Eastern	Crustacean	Crustacean	Crustacean	2.5	1197344	0	0	0	0	0	0	0	0	1919	1252	7418	15660	15774	17151	17039	17500	17638	20520	21519	20363	24288	28027	31027	31742	31395	31037	31976	31931	36488	44261	48119	51869	53206	52217	52592	56989	57660	46568	47668
Bangladesh	BGD	Capture	Freshwater fishes nei	Freshwater fish	Asia - Inland waters	Freshwater fish	Weighted mean	Freshwater fish	2.9	26115857	467697	460000	449000	445000	439000	435000	462000	484000	375778	379727	343939	312842	328440	320550	317201	345719	331838	354459	445676	443319	445377	451055	457055	575609	591300	613860	620185	646389	661066	781770	878413	924316	890966	1027959	869615	884933	784932	822472	822363
Bangladesh	BGD	Capture	Hilsa shad	Hilsa shad	Asia - Inland waters	Freshwater fish	Tenualosa ilisha (Hamilton, 1822)	Hilsa shad	2.9	3673684	0	0	0	0	0	0	0	0	90000	73328	94133	91167	78551	81641	82168	84806	96596	96950	71370	84420	90240	83230	81634	73809	79165	75060	68250	62944	71001	77499	78273	82445	89900	95970	115179	114520	114475	98648	127514
Bangladesh	BGD	Capture	Hilsa shad	Hilsa shad	Indian Ocean, Eastern	Marine fish	Tenualosa ilisha (Hamilton, 1822)	Hilsa shad	2.9	6084333	0	0	0	0	0	0	0	0	56000	71050	83650	103814	104950	110311	111140	114681	125574	130295	121161	129115	135358	131204	124105	140710	140367	154654	152343	136088	184838	198363	198850	196744	200100	202957	198574	225325	232037	252575	257626
Bangladesh	BGD	Capture	Indian threadfin	Indian threadfin	Indian Ocean, Eastern	Marine fish	Leptomelanosoma indicum (Shaw, 1804)	Indian threadfin	3.9	83180	0	0	0	0	0	0	0	0	0	0	0	0	0	0	0	0	0	0	0	0	0	0	0	0	0	0	0	0	0	0	0	0	1040	7733	7732	7805	7089	6646	7249
Bangladesh	BGD	Capture	Marine fishes nei	Marine fish	Indian Ocean, Eastern	Marine fish	Weighted mean	Marine fish	3.07223	7314232	96240	105770	113240	112640	115970	118220	122370	133000	106963	115261	116333	113368	124069	124041	125214	126663	136885	161860	110314	115122	119484	135860	145260	137285	161977	193306	230101	262389	231949	230830	230103	236509	179387	259476	266116	171527	192414	194265	211899
Bangladesh	BGD	Capture	Seerfishes nei	Narrow-barred Spanish mackerel	Indian Ocean, Eastern	Marine fish	Scomberomorus commerson (Lacepède, 1800)	Narrow-barred Spanish mackerel	4.5	51313	0	0	0	0	0	0	0	0	0	95	67	16	60	60	60	40	30	40	50	50	40	50	60	60	60	500	1000	1500	1932	1143	2738	2316	1559	1548	2350	2539	3038	3578	3903
Bangladesh	BGD	Capture	Sea catfishes nei	Sea catfish	Indian Ocean, Eastern	Marine fish	C226	Sea catfish	3.67143	156481	0	0	0	0	0	0	0	0	0	0	0	0	0	0	0	0	0	0	0	0	0	0	0	0	0	0	0	0	0	0	0	0	20534	16515	16721	17193	19700	8594	9719
Bangladesh	BGD	Capture	Sharks, rays, skates, etc. nei	Shark, ray, skate	Indian Ocean, Eastern	Marine fish	C330	Shark and ray and skate	4.28333	53926	0	0	0	0	0	0	0	0	0	0	0	0	0	0	0	0	0	0	0	0	0	0	0	0	0	0	0	0	0	0	0	0	4767	3933	4033	4205	3865	5017	5648
Bangladesh	BGD	Aquaculture	Asian barbs nei	Barb	Asia - Inland waters	Freshwater fish	A7	Barb	2.75	59698	0	0	0	0	0	0	0	0	0	0	0	0	0	0	0	0	0	0	0	0	0	0	0	0	0	0	0	0	0	0	0	0	0	4652	3957	6673	6280	3881	5012
Bangladesh	BGD	Aquaculture	Bronze featherback	Bronze featherback	Asia - Inland waters	Freshwater fish	Notopterus notopterus (Pallas, 1769)	Bronze featherback	3.5	8002.5	0	0	0	0	0	0	0	0	0	0	0	0	0	0	0	0	0	0	0	0	0	0	0	0	0	0	0	0	0	0	0	0	0	1824	759	495	532.5	492	504
Bangladesh	BGD	Aquaculture	Catla	Catla	Asia - Inland waters	Freshwater fish	Gibelion catla (Hamilton, 1822)	Catla	2.8	3685603	0	0	0	0	0	0	0	0	0	0	0	0	0	0	0	0	0	0	0	51504	58574	81199	104520	111169	104435	110578	127714	137015	140576	138495	151373	155165	151698	178852	196400	215328	222859	200403	173270
Bangladesh	BGD	Aquaculture	Climbing perch	Climbing perch	Asia - Inland waters	Freshwater fish	Anabas testudineus (Bloch, 1792)	Climbing perch	3	380151	0	0	0	0	0	0	0	0	0	0	0	0	0	0	0	0	0	0	0	0	0	0	0	0	0	0	0	0	0	0	0	0	0	1824	7125	13406	31143	38839	35246
Bangladesh	BGD	Aquaculture	Clown knifefish	Clown knifefish	Asia - Inland waters	Freshwater fish	Chitala chitala (Hamilton, 1822)	Clown knifefish	3.7	2141.5	0	0	0	0	0	0	0	0	0	0	0	0	0	0	0	0	0	0	0	0	0	0	0	0	0	0	0	0	0	0	0	0	0	365	575	108	95.5	87	99
Bangladesh	BGD	Aquaculture	Common carp	Common carp	Asia - Inland waters	Freshwater fish	Cyprinus carpio Linnaeus, 1758	Common carp	3.1	1045704	0	0	0	0	0	0	0	0	0	0	0	0	0	0	0	0	0	0	0	11738	4777	4082	17675	17876	24075	12586	11918	14594	19522	16598	18568	33564	36662	40262	46313	61637	64769	85158	73579
Bangladesh	BGD	Aquaculture	Cyprinids nei	Carp	Asia - Inland waters	Freshwater fish	A13	Carp	2.73333	339655	0	0	0	0	0	0	0	0	0	0	0	0	0	0	0	0	0	0	0	0	0	0	0	0	0	0	0	0	0	0	0	0	0	11858	11762	12122	39092	22865	26726
Bangladesh	BGD	Aquaculture	Freshwater fishes nei	Freshwater fish	Asia - Inland waters	Freshwater fish	Weighted mean	Freshwater fish	2.4727	4583788	71104	70810	75660	79540	82450	87300	91180	96030	104973	108825	124772	144050	152568	156333	165087	182493	189863	191698	218048	71258	71333	66955	84523	86779	105694	107841	122080	139359	183941	153570	121572	138096	174775	15165	29052	70118	46954	30291	41315
Bangladesh	BGD	Aquaculture	Freshwater prawns, shrimps nei	Shrimp	Asia - Inland waters	Crustacean	Crustacean	Crustacean	2.5	68372	0	0	0	0	0	0	0	0	0	0	0	0	0	0	0	0	0	0	0	0	0	0	0	0	0	0	0	0	0	0	0	0	0	5108	5931	2690	4472	6443	4332
Bangladesh	BGD	Aquaculture	Giant river prawn	Prawn	Asia - Inland waters	Crustacean	Crustacean	Crustacean	2.5	631620	0	0	0	0	0	0	0	0	0	0	0	0	0	0	0	0	0	0	0	1596	4185	4534	5751	5394	5504	9471	9559	10200	17123	19609	20810	23240	23377	26137	30636	39868	45162	43713	45167
Bangladesh	BGD	Aquaculture	Giant tiger prawn	Prawn	Indian Ocean, Eastern	Crustacean	Crustacean	Crustacean	2.5	684239	0	0	0	0	0	0	0	0	0	0	0	0	0	0	0	0	0	0	0	0	0	0	0	0	0	0	0	0	0	0	0	0	0	49710	43154	56569	57785	68948	71430
Bangladesh	BGD	Aquaculture	Grass carp(=White amur)	Grass carp	Asia - Inland waters	Freshwater fish	Ctenopharyngodon idella (Valenciennes, 1844)	Grass carp	2	567065	0	0	0	0	0	0	0	0	0	0	0	0	0	0	0	0	0	0	0	3719	6302	6155	4554	5128	10402	14195	14057	14669	13122	15989	15283	15271	16720	22439	27006	21296	17661	36744	45128
Bangladesh	BGD	Aquaculture	Great snakehead	Great snakehead	Asia - Inland waters	Freshwater fish	Channa marulius (Hamilton, 1822)	Great snakehead	4.5	9409	0	0	0	0	0	0	0	0	0	0	0	0	0	0	0	0	0	0	0	0	0	0	0	0	0	0	0	0	0	0	0	0	0	939	1950	1102	1370	446	607
Bangladesh	BGD	Aquaculture	Indian white prawn	Prawn	Indian Ocean, Eastern	Crustacean	Crustacean	Crustacean	2.5	24050	0	0	0	0	0	0	0	0	0	0	0	0	0	0	0	0	0	0	0	0	0	0	0	0	0	0	0	0	0	0	0	0	0	2336	841	2364	4381	2699	1380
Bangladesh	BGD	Aquaculture	Marine fishes nei	Marine fish	Indian Ocean, Eastern	Marine fish	Weighted mean (Seas)	Marine fish	3.8186	1569381	2199	2190	2340	2460	2550	2700	2820	2970	3833	3704	5293	7277	6780	8937	8881	8945	16000	17520	17379	13301	22126	26748	25851	26912	27801	28044	32026	34101	39493	38049	42413	42320	44140	47839	73825	60290	63220	71720	93657
Bangladesh	BGD	Aquaculture	Mrigal carp	Mrigal carp	Asia - Inland waters	Freshwater fish	Cirrhinus cirrhosus (Bloch, 1795)	Mrigal carp	2.4	3115512	0	0	0	0	0	0	0	0	0	0	0	0	0	0	0	0	0	0	0	31400	44388	66441	70756	71550	78804	89366	98192	105710	120014	112913	116224	123396	122787	132608	149283	158066	161443	175490	165031
Bangladesh	BGD	Aquaculture	Olive barb	Olive barb	Asia - Inland waters	Freshwater fish	Systomus sarana (Hamilton, 1822)	Olive barb	2.9	55248	0	0	0	0	0	0	0	0	0	0	0	0	0	0	0	0	0	0	0	0	0	0	0	0	0	0	0	0	0	0	0	0	0	3466	3218	5539	5242	4650	5835
Bangladesh	BGD	Aquaculture	Orange mud crab	Crab	Indian Ocean, Eastern	Crustacean	Crustacean	Crustacean	2.5	51452	0	0	0	0	0	0	0	0	0	0	0	0	0	0	0	0	0	0	0	0	0	0	0	0	0	0	0	0	0	0	0	0	0	0	0	0	0	0	0
Bangladesh	BGD	Aquaculture	Orangefin labeo	Orangefin labeo	Asia - Inland waters	Freshwater fish	Labeo calbasu (Hamilton, 1822)	Orangefin labeo	2	265820	0	0	0	0	0	0	0	0	0	0	0	0	0	0	0	0	0	0	0	0	0	0	0	0	0	0	0	0	0	0	0	0	0	8149	39121	36563	14953	15401	28189
Bangladesh	BGD	Aquaculture	Penaeus shrimps nei	Shrimp	Indian Ocean, Eastern	Crustacean	Crustacean	Crustacean	2.5	1096631	3760	4230	4760	5360	6030	6780	7630	8000	8219	11282	14658	14773	16577	18235	18624	19555	21000	28525	28763	32434	42038	47738	56416	57770	59143	55499	56020	56503	58044	63052	64700	63600	67197	8061	2125	8071	12230	10925	4661
Bangladesh	BGD	Aquaculture	Philippine catfish	Philippine catfish	Asia - Inland waters	Freshwater fish	Clarias batrachus (Linnaeus, 1758)	Philippine catfish	3.4	79693	0	0	0	0	0	0	0	0	0	0	0	0	0	0	0	0	0	0	0	0	0	0	0	0	0	0	0	0	0	0	0	0	0	1862	6278	4156	4674	5957	5104
Bangladesh	BGD	Aquaculture	Roho labeo	Roho labeo	Asia - Inland waters	Freshwater fish	Labeo rohita (Hamilton, 1822)	Roho labeo	2.2	4883920	0	0	0	0	0	0	0	0	0	0	0	0	0	0	0	0	0	0	0	69636	78465	98779	109949	113971	120446	132974	144839	164841	166259	164154	173304	183175	203164	227030	254320	276813	295575	266442	233883
Bangladesh	BGD	Aquaculture	Silver barb	Silver barb	Asia - Inland waters	Freshwater fish	Barbonymus gonionotus (Bleeker, 1849)	Silver barb	2.4	385599	0	0	0	0	0	0	0	0	0	0	0	0	0	0	0	0	0	0	0	0	0	0	0	0	0	0	0	0	0	0	0	0	0	7297	11837	47096	43085	31606	40158
Bangladesh	BGD	Aquaculture	Silver carp	Silver carp	Asia - Inland waters	Freshwater fish	Hypophthalmichthys molitrix (Valenciennes, 1844)	Silver carp	2	3940908	0	0	0	0	0	0	0	0	0	0	0	0	0	0	0	0	0	0	0	30487	46899	83233	94817	96653	120816	152086	170199	179964	156658	159662	167802	167985	165022	172497	195596	138930	180625	233964	201009
Bangladesh	BGD	Aquaculture	Speckled shrimp	Shrimp	Indian Ocean, Eastern	Crustacean	Crustacean	Crustacean	2.5	77286	0	0	0	0	0	0	0	0	0	0	0	0	0	0	0	0	0	0	0	0	0	0	0	0	0	0	0	0	0	0	0	0	0	11500	5297	17777	13144	7533	3222
Bangladesh	BGD	Aquaculture	Spotted snakehead	Spotted snakehead	Asia - Inland waters	Freshwater fish	Channa punctata (Bloch, 1793)	Spotted snakehead	3.8	9951	0	0	0	0	0	0	0	0	0	0	0	0	0	0	0	0	0	0	0	0	0	0	0	0	0	0	0	0	0	0	0	0	0	1496	1281	610	930	649	959
Bangladesh	BGD	Aquaculture	Stinging catfish	Stinging catfish	Asia - Inland waters	Freshwater fish	Heteropneustes fossilis (Bloch, 1794)	Stinging catfish	3.6	76764	0	0	0	0	0	0	0	0	0	0	0	0	0	0	0	0	0	0	0	0	0	0	0	0	0	0	0	0	0	0	0	0	0	2790	8200	2913	3444	5076	4941
Bangladesh	BGD	Aquaculture	Striped catfish	Striped catfish	Asia - Inland waters	Freshwater fish	Pangasianodon hypophthalmus (Sauvage, 1878)	Striped catfish	3.1	3520396	0	0	0	0	0	0	0	0	0	0	0	0	0	0	0	0	0	0	0	0	0	0	0	0	0	0	0	0	0	0	0	0	0	59487	125724	156375	258137	278752	361154
Bangladesh	BGD	Aquaculture	Striped snakehead	Striped snakehead	Asia - Inland waters	Freshwater fish	Channa striata (Bloch, 1793)	Striped snakehead	3.6	9853	0	0	0	0	0	0	0	0	0	0	0	0	0	0	0	0	0	0	0	0	0	0	0	0	0	0	0	0	0	0	0	0	0	1309	1450	880	1116	535	766
Bangladesh	BGD	Aquaculture	Tilapias nei	Tilapia	Asia - Inland waters	Freshwater fish	A38	Tilapia	2.15714	2459533	0	0	0	0	0	0	0	0	0	0	0	0	0	0	0	0	0	0	0	0	0	0	0	0	0	0	0	0	0	0	0	0	0	16237	24823	104716	123712	209650	283937
Bangladesh	BGD	Aquaculture	Wallago	Wallago	Asia - Inland waters	Freshwater fish	Wallago attu (Bloch & Schneider, 1801)	Wallago	3.7	11170	0	0	0	0	0	0	0	0	0	0	0	0	0	0	0	0	0	0	0	0	0	0	0	0	0	0	0	0	0	0	0	0	0	1186	676	1188	1980	449	624
Barbados	BRB	Capture	Albacore	Albacore	Atlantic, Western Central	Marine fish	Thunnus alalunga (Bonnaterre, 1788)	Albacore	4.3	264	0	0	0	0	0	0	0	0	0	0	0	0	0	0	0	0	0	0	0	0	0	1	1	8	10	8	6	8	9	13	9	7	7	4	6	4	20	22	13
Barbados	BRB	Capture	Carangids nei	Amberjack, jack, trevally, scad, pompano	Atlantic, Western Central	Marine fish	C22	Amberjack and jack and trevally and scad and pompano	4.06667	1209	0	0	0	0	0	15	39	114	60	93	54	12	6	31	14	23	31	28	15	24	28	19	14	6	28	11	10	10	10	15	20	16	8	9	20	10	39	9	16
Barbados	BRB	Capture	Atlantic sailfish	Atlantic sailfish	Atlantic, Western Central	Marine fish	Istiophorus albicans (Latreille, 1804)	Atlantic sailfish	4.5	1220	0	0	0	0	0	0	0	0	0	0	0	0	0	69	45	29	42	50	46	74	25	71	58	44	44	42	26	26	26	42	58	42	0	0	18	36	36	39	44
Barbados	BRB	Capture	Atlantic white marlin	Atlantic white marlin	Atlantic, Western Central	Marine fish	Kajikia albida (Poey, 1860)	Atlantic white marlin	4.5	632	0	0	0	0	0	0	0	0	0	0	0	0	117	11	39	17	24	29	26	43	15	41	33	25	25	24	15	15	0	0	33	0	0	0	6	3	5	6	6
Barbados	BRB	Capture	Bigeye tuna	Bigeye tuna	Atlantic, Western Central	Marine fish	Thunnus obesus (Lowe, 1839)	Bigeye tuna	4.5	396	0	0	0	0	0	0	0	0	0	0	0	0	0	0	0	0	0	0	0	0	0	24	17	15	19	15	12	16	19	27	18	14	14	7	12	7	15	11	26
Barbados	BRB	Capture	Blue marlin	Blue marlin	Atlantic, Western Central	Marine fish	Makaira nigricans Lacepède, 1802	Blue marlin	4.5	1415	120	81	72	51	73	117	99	126	126	10	14	13	46	3	18	12	18	21	19	31	25	30	25	19	19	18	11	11	0	0	25	0	0	0	9	13	14	11	12
Barbados	BRB	Capture	Common dolphinfish	Common dolphinfish	Atlantic, Western Central	Marine fish	Coryphaena hippurus Linnaeus, 1758	Common dolphinfish	4.4	29846	1208	741	862	1040	619	543	585	1341	588	1278	912	708	2011	670	906	715	1470	513	499	758	849	721	482	745	728	574	553	458	455	357	476	428	693	870	465	505	459	514	278
Barbados	BRB	Capture	Flyingfishes nei	Flyingfish	Atlantic, Western Central	Marine fish	C72	Flyingfish	3.35714	79863	2462	1510	1756	2119	933	1968	2040	4116	4281	1914	2661	2436	5936	1423	1670	1093	1461	1987	1640	1766	2042	1566	2680	2075	1916	1673	1590	1912	1186	1112	922	1288	2354	2292	2424	908	354	1909	1314
Barbados	BRB	Capture	Marine fishes nei	Marine fish	Atlantic, Western Central	Marine fish	Weighted mean	Marine fish	3.76336	7762	210	129	150	180	1584	369	231	315	171	147	177	78	93	87	54	46	71	69	83	220	113	74	62	72	60	109	89	90	92	113	107	116	109	137	98	127	145	206	219
Barbados	BRB	Capture	Marlins,sailfishes,etc. nei	Marlin, sailfish	Atlantic, Western Central	Marine fish	C155	Marlin and sailfish	4.5	404	0	0	0	0	0	0	0	0	0	0	0	0	0	0	0	0	0	0	0	0	0	0	0	0	4	1	1	30	48	115	0	69	100	36	0	0	0	0	0
Barbados	BRB	Capture	Seerfishes nei	Narrow-barred Spanish mackerel	Atlantic, Western Central	Marine fish	Scomberomorus commerson (Lacepède, 1800)	Narrow-barred Spanish mackerel	4.5	2767	220	135	157	189	116	144	219	222	219	120	138	159	332	68	51	45	51	55	36	42	49	0	0	0	0	0	0	0	0	0	0	0	0	0	0	0	0	0	0
Barbados	BRB	Capture	Sharks, rays, skates, etc. nei	Shark, ray, skate	Atlantic, Western Central	Marine fish	C329	Shark and ray and skate	4.32353	1644	196	120	140	169	22	36	48	63	63	51	48	51	134	37	18	14	24	18	22	24	25	14	12	15	21	14	14	12	13	18	15	13	15	9	11	11	15	10	12
Barbados	BRB	Capture	Skipjack tuna	Skipjack tuna	Atlantic, Western Central	Marine fish	Katsuwonus pelamis (Linnaeus, 1758)	Skipjack tuna	4.4	433	0	0	0	0	0	78	72	39	48	36	33	21	3	9	11	14	5	6	6	6	5	5	10	3	3	1	2	2	2	2	2	0	0	0	0	1	2	0	1
Barbados	BRB	Capture	Snappers, jobfishes nei	Snapper, jobfish	Atlantic, Western Central	Marine fish	C248	Snapper and jobfish	4	2912	352	216	252	303	348	111	111	135	126	114	24	63	14	53	52	34	35	19	26	41	40	26	32	24	25	20	12	15	6	6	13	14	22	16	28	10	19	14	11
Barbados	BRB	Capture	Swordfish	Swordfish	Atlantic, Western Central	Marine fish	Xiphias gladius Linnaeus, 1758	Swordfish	4.5	527	0	0	0	0	0	0	0	0	0	0	0	0	0	0	0	0	0	0	0	0	33	16	16	12	13	19	10	21	26	44	39	27	39	20	13	23	21	16	21
Barbados	BRB	Capture	Tuna-like fishes nei	Tuna, bonito	Atlantic, Western Central	Marine fish	C310	Tuna and bonito	4.45	1362	78	186	129	123	0	0	0	0	0	0	0	0	0	0	0	71	112	167	162	255	68	0	0	0	11	0	0	0	0	0	0	0	0	0	0	0	0	0	0
Barbados	BRB	Capture	Wahoo	Wahoo	Atlantic, Western Central	Marine fish	Acanthocybium solandri (Cuvier, 1832)	Wahoo	4.3	1115	0	0	0	0	0	0	0	0	0	0	0	0	0	51	51	60	51	91	82	42	35	52	52	40	39	26	44	34	45	26	41	36	34	17	30	29	22	21	17
Barbados	BRB	Capture	Yellowfin tuna	Yellowfin tuna	Atlantic, Western Central	Marine fish	Thunnus albacares (Bonnaterre, 1788)	Yellowfin tuna	4.4	6426	94	58	67	81	40	30	36	51	90	57	39	57	236	62	89	108	179	161	156	255	160	149	150	167	210	166	125	178	211	292	197	154	156	79	129	131	195	188	218
Barbados	BRB	Aquaculture	Nile tilapia	Nile tilapia	America, North - Inland waters	Freshwater fish	Oreochromis niloticus (Linnaeus, 1758)	Nile tilapia	2	181.5	0	0	0	0	0	0	0	0	0	0	0	0	0	0	0	0	0	0	0	0	0	0	0	0	0	0	0	0	0	0	1.5	1.5	1.5	1.5	1.5	10	10	14	20
Belarus	BLR	Capture	Burbot	Burbot	Europe - Inland waters	Freshwater fish	Lota lota (Linnaeus, 1758)	Burbot	3.8	231	0	0	0	0	0	0	0	0	0	0	0	0	27	15	15	1	11	28	16	14	17	13	18	20	7	29	0	0	0	0	0	0	0	0	0	0	0	0	0
Belarus	BLR	Capture	Cyprinids nei	Carp	Europe - Inland waters	Freshwater fish	C350	Carp	2.5	4974	0	0	0	0	0	0	0	0	0	0	0	0	233	335	235	111	164	221	122	105	92	61	47	27	19	77	4	139	138	109	100	125	185	188	225	318	228	173	203
Belarus	BLR	Capture	Common carp	Common carp	Europe - Inland waters	Freshwater fish	Cyprinus carpio Linnaeus, 1758	Common carp	3.1	929	0	0	0	0	0	0	0	0	0	0	0	0	0	0	0	0	118	59	18	39	39	12	8	5	17	15	44	44	34	30	39	38	42	41	42	40	33	28	31
Belarus	BLR	Capture	European eel	European eel	Europe - Inland waters	Freshwater fish	Anguilla anguilla (Linnaeus, 1758)	European eel	3.6	522	0	0	0	0	0	0	0	0	0	0	0	0	40	56	46	15	22	19	26	15	20	15	18	16	14	25	12	8	16	13	9	9	10	8	31	8	12	9	6
Belarus	BLR	Capture	European perch	European perch	Europe - Inland waters	Freshwater fish	Perca fluviatilis Linnaeus, 1758	European perch	4.4	1781	0	0	0	0	0	0	0	0	0	0	0	0	115	114	110	31	110	215	98	93	101	75	49	38	34	86	37	40	23	24	27	28	34	33	38	45	31	25	22
Belarus	BLR	Capture	Freshwater bream	Freshwater bream	Europe - Inland waters	Freshwater fish	Abramis brama (Linnaeus, 1758)	Freshwater bream	3.1	8032	0	0	0	0	0	0	0	0	0	0	0	0	720	634	887	153	360	464	201	145	244	182	130	98	27	198	214	146	109	109	131	162	193	224	212	258	262	175	198
Belarus	BLR	Capture	Freshwater fishes nei	Freshwater fish	Europe - Inland waters	Freshwater fish	Weighted mean	Freshwater fish	3.08385	1776	0	0	0	0	0	0	0	0	0	0	0	0	412	1068	209	1	22	2	0	0	0	0	0	0	0	0	0	4	3	5	17	1	1	3	1	9	5	4	7
Belarus	BLR	Capture	Goldfish	Goldfish	Europe - Inland waters	Freshwater fish	Carassius auratus (Linnaeus, 1758)	Goldfish	2	4347	0	0	0	0	0	0	0	0	0	0	0	0	214	227	219	31	188	384	60	64	69	35	106	138	154	188	176	105	44	55	91	72	114	146	135	224	221	141	139
Belarus	BLR	Capture	Orfe(=Ide)	Ide	Europe - Inland waters	Freshwater fish	Leuciscus idus (Linnaeus, 1758)	Ide	3.8	324	0	0	0	0	0	0	0	0	0	0	0	0	31	36	27	6	31	45	22	18	19	11	14	11	5	18	1	2	2	1	1	1	1	1	2	2	2	2	1
Belarus	BLR	Capture	Northern pike	Northern pike	Europe - Inland waters	Freshwater fish	Esox lucius Linnaeus, 1758	Northern pike	4.1	3324	0	0	0	0	0	0	0	0	0	0	0	0	357	315	444	33	60	468	42	29	27	11	9	477	162	171	28	25	28	48	39	45	49	52	59	68	51	38	33
Belarus	BLR	Capture	Pike-perch	Pike-perch	Europe - Inland waters	Freshwater fish	Sander lucioperca (Linnaeus, 1758)	Pike-perch	4	712	0	0	0	0	0	0	0	0	0	0	0	0	38	58	52	8	49	67	8	9	6	3	3	10	17	24	19	3	5	4	7	5	6	8	15	21	18	21	22
Belarus	BLR	Capture	Roach	Roach	Europe - Inland waters	Freshwater fish	Rutilus rutilus (Linnaeus, 1758)	Roach	3	4670	0	0	0	0	0	0	0	0	0	0	0	0	264	530	304	388	82	417	62	83	95	42	24	19	9	33	302	277	174	189	173	188	158	108	110	108	83	68	93
Belarus	BLR	Capture	Tench	Tench	Europe - Inland waters	Freshwater fish	Tinca tinca (Linnaeus, 1758)	Tench	3.7	497	0	0	0	0	0	0	0	0	0	0	0	0	18	23	15	3	14	23	11	13	8	4	3	90	41	7	7	8	7	7	9	13	16	13	19	17	15	10	10
Belarus	BLR	Capture	Three-spined stickleback	Three-spined stickleback	Europe - Inland waters	Freshwater fish	Gasterosteus aculeatus Linnaeus, 1758	Three-spined stickleback	3.3	2271	0	0	0	0	0	0	0	0	0	0	0	0	375	221	420	0	271	577	99	85	80	34	26	13	29	41	0	0	0	0	0	0	0	0	0	0	0	0	0
Belarus	BLR	Capture	White bream	White bream	Europe - Inland waters	Freshwater fish	Blicca bjoerkna (Linnaeus, 1758)	White bream	3.2	147	0	0	0	0	0	0	0	0	0	0	0	0	0	0	0	0	0	0	0	0	0	0	0	0	0	0	147	0	0	0	0	0	0	0	0	0	0	0	0
Belarus	BLR	Capture	Whitefishes nei	Whitefish	Europe - Inland waters	Freshwater fish	C319	Whitefish	3.15	110	0	0	0	0	0	0	0	0	0	0	0	0	0	7	5	12	5	4	1	3	4	1	2	17	18	31	0	0	0	0	0	0	0	0	0	0	0	0	0
Belarus	BLR	Aquaculture	Common carp	Common carp	Europe - Inland waters	Freshwater fish	Cyprinus carpio Linnaeus, 1758	Common carp	3.1	268615	0	0	0	0	0	0	0	0	0	0	0	0	16043	17657	16554	14739	6967	5814	5902	4452	3805	2873	3254	4088	5867	3845	4504	3386	3207	4713	7460	12469	13022	13609	12834	12625	11639	10157	7121
Belarus	BLR	Aquaculture	Crucian carp	Crucian carp	Europe - Inland waters	Freshwater fish	Carassius carassius (Linnaeus, 1758)	Crucian carp	3.1	15452.2	0	0	0	0	0	0	0	0	0	0	0	0	0	0	0	0	441	301	260	259	396	286	410	354	396	268	1595	1608	721	390	391	351	398	445	641	765	692	587	835
Belarus	BLR	Aquaculture	Freshwater fishes nei	Freshwater fish	Europe - Inland waters	Freshwater fish	Weighted mean	Freshwater fish	3.04519	1482.2	0	0	0	0	0	0	0	0	0	0	0	0	0	0	0	0	0	0	0	0	0	0	0	142	36	33	109	88	54	49	71	60	71	56	72	50	91	86	36
Belarus	BLR	Aquaculture	Grass carp(=White amur)	Grass carp	Europe - Inland waters	Freshwater fish	Ctenopharyngodon idella (Valenciennes, 1844)	Grass carp	2	6196.3	0	0	0	0	0	0	0	0	0	0	0	0	0	0	0	0	1	1	0	0	0	0	0	7	6	12	17	12	5	222	207	224	116	305	665	925	1006	637	398
Belarus	BLR	Aquaculture	North African catfish	North African catfish	Europe - Inland waters	Freshwater fish	Clarias gariepinus (Burchell, 1822)	North African catfish	3.8	155	0	0	0	0	0	0	0	0	0	0	0	0	0	0	0	0	0	0	0	0	0	0	0	0	0	0	0	0	0	0	0	0	0	0	0	0	45	60	35
Belarus	BLR	Aquaculture	Northern pike	Northern pike	Europe - Inland waters	Freshwater fish	Esox lucius Linnaeus, 1758	Northern pike	4.1	9207.6	0	0	0	0	0	0	0	0	0	0	0	0	0	0	0	0	995	895	764	739	1829	1157	1062	12	40	47	23	19	31	122	116	84	89	110	111	96	88	91	69
Belarus	BLR	Aquaculture	Rainbow trout	Rainbow trout	Europe - Inland waters	Freshwater fish	Oncorhynchus mykiss (Walbaum, 1792)	Rainbow trout	4.1	2902.1	0	0	0	0	0	0	0	0	0	0	0	0	0	0	0	0	0	0	0	0	0	0	0	0	0	0	0	0	0	0	0	0	0	0	0	37	72	75	159
Belarus	BLR	Aquaculture	Siberian sturgeon	Siberian sturgeon	Europe - Inland waters	Freshwater fish	Acipenser baerii Brandt, 1869	Siberian sturgeon	3.3	1001.8	0	0	0	0	0	0	0	0	0	0	0	0	0	0	0	0	0	0	0	0	0	0	0	0	0	0	0	0	0	0	0	0	26	53.8	52	74	67	43	83
Belarus	BLR	Aquaculture	Silver carp	Silver carp	Europe - Inland waters	Freshwater fish	Hypophthalmichthys molitrix (Valenciennes, 1844)	Silver carp	2	17435.6	0	0	0	0	0	0	0	0	0	0	0	0	102	150	67	1	11	7	8	13	8	6	1	125	358	459	261	265	126	146	156	898	885	1018	1839	1667	1753	1759	1898
Belarus	BLR	Aquaculture	Sterlet sturgeon	Sterlet sturgeon	Europe - Inland waters	Freshwater fish	Acipenser ruthenus Linnaeus, 1758	Sterlet sturgeon	3.6	186.8	0	0	0	0	0	0	0	0	0	0	0	0	0	0	0	0	0	0	0	0	0	0	0	0	0	0	0	0	0	0	0	0	10	12.2	13	33	31	28	16
Belarus	BLR	Aquaculture	Trouts nei	Trout	Europe - Inland waters	Freshwater fish	A43	Trout	3.8	152	0	0	0	0	0	0	0	0	0	0	0	0	0	10	17	10	0	0	0	0	0	0	0	2	2	2	14	15	6	6	5	5	13	31	14	0	0	0	0
Belarus	BLR	Aquaculture	Wels(=Som) catfish	Wels catfish	Europe - Inland waters	Freshwater fish	Silurus glanis Linnaeus, 1758	Wels catfish	4.4	205.3	0	0	0	0	0	0	0	0	0	0	0	0	0	0	0	0	0	0	0	0	0	0	0	0	0	0	0	0	0	0	0	0	6	19	24	21	15	25	8
Belgium	BEL	Capture	Atlantic cod	Atlantic cod	Atlantic, Northeast	Marine fish	Gadus morhua Linnaeus, 1758	Atlantic cod	4.1	216458	9295	12190	19509	15125	11240	11230	7632	7715	6801	6240	8221	8792	7273	5324	4473	3504	4248	4347	3611	5938	4491	5677	6893	4540	3693	3207	3506	1856	1930	2075	1551	1268	1140	1087	797	868	1214	1343	1480
Belgium	BEL	Capture	Atlantic halibut	Atlantic halibut	Atlantic, Northeast	Marine fish	Hippoglossus hippoglossus (Linnaeus, 1758)	Atlantic halibut	4	415	30	43	29	36	41	25	9	11	14	14	19	24	15	6	3	6	3	6	2	15	5	4	3	2	2	2	3	1	2	3	2	5	7	6	4	1	0	1	1
Belgium	BEL	Capture	Atlantic herring	Atlantic herring	Atlantic, Northeast	Marine fish	Clupea harengus Linnaeus, 1758	Atlantic herring	3.4	39562	1445	57	1	2	2573	8899	10090	5970	5080	3482	415	40	4	434	179	163	242	58	145	12	2	1	1	1	1	11	23	5	8	6	3	1	0	0	1	3	4	22	27
Belgium	BEL	Capture	Atlantic horse mackerel	Atlantic horse mackerel	Atlantic, Northeast	Marine fish	Trachurus trachurus (Linnaeus, 1758)	Atlantic horse mackerel	3.7	1219	17	15	16	12	8	35	8	55	20	14	14	11	15	10	13	27	34	74	58	51	28	19	19	21	19	20	30	5	4	6	4	6	3	5	22	29	48	65	74
Belgium	BEL	Capture	Atlantic mackerel	Atlantic mackerel	Atlantic, Northeast	Marine fish	Scomber scombrus Linnaeus, 1758	Atlantic mackerel	3.6	3348	302	50	11	13	5	67	106	102	68	44	50	15	22	38	39	124	104	193	353	108	64	106	125	178	151	98	23	4	5	1	4	1	2	4	29	21	44	62	56
Belgium	BEL	Capture	Atlantic wolffish	Atlantic wolffish	Atlantic, Northeast	Marine fish	Anarhichas lupus Linnaeus, 1758	Atlantic wolffish	3.6	5171	127	158	82	85	113	93	70	124	147	164	155	98	133	123	197	159	319	180	161	206	99	125	208	201	290	175	188	69	96	130	67	74	70	52	34	33	37	33	77
Belgium	BEL	Capture	Blonde ray	Blonde ray	Atlantic, Northeast	Marine fish	Raja brachyura Lafont, 1871	Blonde ray	3.8	5267	0	0	0	0	0	0	0	0	0	0	0	0	0	0	0	0	0	0	0	0	0	0	0	0	0	0	0	0	0	0	0	0	307	296	280	366	495	543	446
Belgium	BEL	Capture	Brill	Brill	Atlantic, Northeast	Marine fish	Scophthalmus rhombus (Linnaeus, 1758)	Brill	4.4	15757	265	274	291	309	276	307	362	403	392	382	381	378	296	281	354	355	361	425	379	378	422	349	341	365	423	491	448	478	419	391	390	419	360	335	350	341	317	315	309
Belgium	BEL	Capture	Cyprinids nei	Carp	Europe - Inland waters	Freshwater fish	C350	Carp	2.5	1306	0	0	0	0	0	0	0	0	0	50	49	9	9	49	50	50	50	50	50	50	50	50	50	50	50	50	50	50	50	50	50	50	50	50	50	10	10	10	10
Belgium	BEL	Capture	Common carp	Common carp	Europe - Inland waters	Freshwater fish	Cyprinus carpio Linnaeus, 1758	Common carp	3.1	871	0	0	0	0	0	0	0	0	0	31	30	30	30	30	30	30	30	30	30	30	30	30	30	30	30	30	30	30	30	30	30	30	30	30	30	10	10	10	10
Belgium	BEL	Capture	Common dab	Common dab	Atlantic, Northeast	Marine fish	Limanda limanda (Linnaeus, 1758)	Common dab	3	27660	588	728	580	538	603	651	581	703	756	647	620	792	951	596	535	611	602	666	569	557	690	789	961	980	865	850	752	681	591	558	605	624	559	570	553	469	625	663	481
Belgium	BEL	Capture	Common sole	Common sole	Atlantic, Northeast	Marine fish	Solea solea (Linnaeus, 1758)	Common sole	3.2	177936	3419	3311	2962	3828	3746	3704	4053	3648	3609	4428	4776	4606	3691	4317	5230	5658	4509	5231	5703	5457	5150	4514	4102	4492	4479	4975	5089	5132	4712	4383	3991	3856	3771	4004	3886	3530	3055	2889	3605
Belgium	BEL	Capture	Edible crab	Crab	Atlantic, Northeast	Crustacean	Crustacean	Crustacean	2.5	8229	214	224	217	208	180	170	175	219	173	211	118	120	163	186	144	274	195	274	244	268	175	222	180	81	106	108	126	142	140	143	112	130	115	45	95	104	272	271	272
Belgium	BEL	Capture	Cuckoo ray	Cuckoo ray	Atlantic, Northeast	Marine fish	Leucoraja naevus (Müller & Henle, 1841)	Cuckoo ray	4.2	764	0	0	0	0	0	0	0	0	0	0	0	0	0	0	0	0	0	0	0	0	0	0	0	0	0	0	0	0	0	0	0	0	86	80	74	117	94	101	49
Belgium	BEL	Capture	Common cuttlefish	Cuttlefish	Atlantic, Northeast	Cephalopod	Cephalopod	Cephalopod	3	15762	0	0	0	0	0	0	0	0	0	0	0	0	0	0	0	88	171	206	288	467	386	154	252	222	463	370	741	569	818	598	730	1395	872	321	454	392	836	434	373
Belgium	BEL	Capture	Dogfishes and hounds nei	Dogfish, hound	Atlantic, Northeast	Marine fish	C56	Dogfish and hound	4.1	18776	538	422	431	424	451	518	487	525	549	473	580	640	522	562	482	323	391	288	379	377	415	430	365	345	390	396	448	444	465	488	503	478	521	502	484	565	519	470	494
Belgium	BEL	Capture	European conger	European conger	Atlantic, Northeast	Marine fish	Conger conger (Linnaeus, 1758)	European conger	4.3	1762	0	0	0	0	0	0	0	0	0	0	0	0	0	126	128	48	53	52	54	58	75	73	79	53	49	56	66	69	62	64	58	81	65	31	27	31	38	26	40
Belgium	BEL	Capture	European eel	European eel	Europe - Inland waters	Freshwater fish	Anguilla anguilla (Linnaeus, 1758)	European eel	3.6	1140	0	0	0	0	0	0	0	0	0	48	48	48	48	48	30	30	30	30	30	30	30	30	30	30	30	30	30	30	30	30	30	30	30	30	30	30	30	30	30
Belgium	BEL	Capture	European flounder	European flounder	Atlantic, Northeast	Marine fish	Platichthys flesus (Linnaeus, 1758)	European flounder	3.3	10335	97	111	124	131	191	164	111	88	274	166	158	134	164	202	155	272	170	213	223	348	278	146	307	363	322	316	230	262	410	295	227	343	345	325	299	322	401	387	379
Belgium	BEL	Capture	European hake	European hake	Atlantic, Northeast	Marine fish	Merluccius merluccius (Linnaeus, 1758)	European hake	4.4	5479	356	240	152	165	300	236	219	176	223	226	157	136	139	136	163	172	183	116	105	76	42	54	76	92	117	124	91	72	106	94	83	79	72	51	69	52	40	51	60
Belgium	BEL	Capture	European perch	European perch	Europe - Inland waters	Freshwater fish	Perca fluviatilis Linnaeus, 1758	European perch	4.4	743	0	0	0	0	0	0	0	0	0	24	24	24	24	24	25	25	25	25	25	25	25	25	25	15	25	25	25	25	25	25	25	25	25	25	25	12	12	12	12
Belgium	BEL	Capture	European plaice	European plaice	Atlantic, Northeast	Marine fish	Pleuronectes platessa Linnaeus, 1758	European plaice	3.2	390004	5912	7895	6883	8227	8058	7793	8521	10591	11627	12003	9973	12336	15386	14416	17766	17954	14823	12775	10398	9290	7684	7469	7369	8186	9148	8487	7043	6487	6053	5063	5139	5732	5220	5008	5200	6344	6687	8228	8868
Belgium	BEL	Capture	European seabass	European seabass	Atlantic, Northeast	Marine fish	Dicentrarchus labrax (Linnaeus, 1758)	European seabass	3.5	2210	0	0	0	0	0	0	0	0	0	0	0	0	0	0	0	0	0	0	0	0	0	0	0	0	0	0	0	153	159	207	211	179	187	174	216	153	155	146	148
Belgium	BEL	Capture	Freshwater bream	Freshwater bream	Europe - Inland waters	Freshwater fish	Abramis brama (Linnaeus, 1758)	Freshwater bream	3.1	1669	0	0	0	0	0	0	0	0	0	50	52	52	60	60	60	60	60	60	60	60	60	60	60	60	60	60	60	60	60	60	60	60	60	60	60	15	15	15	15
Belgium	BEL	Capture	Atlantic redfishes nei	Golden redfish	Atlantic, Northeast	Marine fish	Sebastes norvegicus (Ascanius, 1772)	Golden redfish	4	11496	1524	1396	1549	1385	1381	924	283	389	291	400	423	398	372	192	70	154	111	124	54	16	19	16	2	3	5	6	3	2	1	2	1	0	0	0	0	0	0	0	0
Belgium	BEL	Capture	Grayling	Grayling	Europe - Inland waters	Freshwater fish	Thymallus thymallus (Linnaeus, 1758)	Grayling	3.1	124	0	0	0	0	0	0	0	0	0	3	3	3	5	5	5	5	5	5	5	5	5	5	5	5	5	5	5	5	5	5	5	5	5	5	5	0	0	0	0
Belgium	BEL	Capture	Greater weever	Greater weever	Atlantic, Northeast	Marine fish	Trachinus draco Linnaeus, 1758	Greater weever	4.2	211	0	0	0	0	0	0	0	0	0	0	0	0	0	0	0	0	0	0	0	0	0	0	0	0	0	0	0	0	0	0	0	0	0	0	0	0	0	12	31
Belgium	BEL	Capture	Grey gurnard	Grey gurnard	Atlantic, Northeast	Marine fish	Eutrigla gurnardus (Linnaeus, 1758)	Grey gurnard	3.9	2403	0	0	0	0	0	0	0	0	0	137	0	115	117	117	109	92	116	125	79	59	119	61	47	49	44	33	63	37	40	38	25	21	21	30	43	63	103	97	65
Belgium	BEL	Capture	Gurnards, searobins nei	Gurnard	Atlantic, Northeast	Marine fish	C106	Gurnard	3.85	9017	568	508	463	427	402	435	519	608	638	113	435	175	219	315	327	213	236	209	270	255	235	245	200	160	161	177	183	276	0	0	0	0	0	0	0	0	0	0	0
Belgium	BEL	Capture	Haddock	Haddock	Atlantic, Northeast	Marine fish	Melanogrammus aeglefinus (Linnaeus, 1758)	Haddock	4	36475	3686	3309	2135	1800	2608	1934	1359	1264	880	1130	600	479	677	763	826	688	820	835	706	648	394	746	976	569	512	840	737	511	523	379	229	329	236	246	259	335	327	259	206
Belgium	BEL	Capture	John dory	John dory	Atlantic, Northeast	Marine fish	Zeus faber Linnaeus, 1758	John dory	4.5	207	0	0	0	0	0	0	0	0	0	0	0	0	0	0	0	0	0	0	0	0	0	0	0	0	0	0	0	0	0	0	0	0	0	0	0	0	0	17	33
Belgium	BEL	Capture	Lemon sole	Lemon sole	Atlantic, Northeast	Marine fish	Microstomus kitt (Walbaum, 1792)	Lemon sole	3.2	41901	819	883	989	916	741	843	1246	1523	1532	1410	891	803	901	787	787	749	776	710	709	1006	1094	975	1256	1020	1057	1076	1089	1027	1341	1155	925	888	885	679	663	821	947	1089	1192
Belgium	BEL	Capture	Ling	Ling	Atlantic, Northeast	Marine fish	Molva molva (Linnaeus, 1758)	Ling	4.4	8706	666	573	671	590	575	316	269	380	357	220	240	284	341	301	210	190	180	168	171	181	153	124	124	103	120	88	91	67	97	94	57	71	71	42	48	57	74	67	97
Belgium	BEL	Capture	Norway lobster	Lobster	Atlantic, Northeast	Crustacean	Crustacean	Crustacean	2.5	19036	448	475	597	312	593	552	475	659	638	680	344	437	500	574	618	439	384	418	306	413	188	316	240	349	254	284	287	231	226	190	228	215	212	282	134	306	382	317	503
Belgium	BEL	Capture	Megrim	Megrim	Atlantic, Northeast	Marine fish	Lepidorhombus whiffiagonis (Walbaum, 1792)	Megrim	4.3	10609	274	350	234	244	341	328	260	249	304	292	238	176	265	374	192	62	83	63	129	225	208	188	142	143	132	87	80	167	223	157	103	205	171	212	278	338	613	539	189
Belgium	BEL	Capture	Monkfishes nei	Monkfish	Atlantic, Northeast	Marine fish	Lophius piscatorius Linnaeus, 1758	Monkfish	4.5	56609	872	799	765	937	1070	1091	1691	2771	3013	2461	1596	1039	1020	1486	740	557	823	1024	1638	1772	1369	1113	961	818	1047	1354	1312	1250	1495	1302	1193	1363	964	853	1031	1279	1716	1633	993
Belgium	BEL	Capture	Northern pike	Northern pike	Europe - Inland waters	Freshwater fish	Esox lucius Linnaeus, 1758	Northern pike	4.1	589	0	0	0	0	0	0	0	0	0	22	21	21	21	21	20	20	20	20	20	20	20	20	20	20	20	20	20	20	20	20	20	20	20	20	20	7	7	7	7
Belgium	BEL	Capture	Nursehound	Nursehound	Atlantic, Northeast	Marine fish	Scyliorhinus stellaris (Linnaeus, 1758)	Nursehound	4	264	0	0	0	0	0	0	0	0	0	0	0	0	0	0	0	0	0	0	0	0	0	0	0	0	0	0	0	0	0	0	0	0	0	0	0	0	0	0	27
Belgium	BEL	Capture	Octopuses, etc. nei	Octopus	Atlantic, Northeast	Cephalopod	Cephalopod	Cephalopod	3	1827	0	0	0	0	0	0	0	0	0	0	0	0	0	0	0	46	44	37	40	62	28	45	49	41	44	29	70	51	50	21	35	48	31	45	69	93	128	111	46
Belgium	BEL	Capture	Picked dogfish	Picked dogfish	Atlantic, Northeast	Marine fish	Squalus acanthias Linnaeus, 1758	Picked dogfish	4.4	8459	589	652	1262	896	646	567	623	547	590	447	471	339	135	187	102	68	56	47	21	14	16	15	17	10	11	13	23	12	13	21	17	10	11	7	1	3	0	0	0
Belgium	BEL	Capture	Pike-perch	Pike-perch	Europe - Inland waters	Freshwater fish	Sander lucioperca (Linnaeus, 1758)	Pike-perch	4	1067	0	0	0	0	0	0	0	0	0	2	2	2	2	2	15	15	15	15	15	15	15	15	15	10	15	15	15	15	15	15	15	15	15	15	15	83	83	83	83
Belgium	BEL	Capture	Pollack	Pollack	Atlantic, Northeast	Marine fish	Pollachius pollachius (Linnaeus, 1758)	Pollack	4.3	6741	475	289	291	226	333	309	203	227	261	283	289	176	230	192	199	112	120	109	144	158	115	119	113	108	116	137	143	125	132	124	96	107	90	53	47	49	60	55	107
Belgium	BEL	Capture	Pouting(=Bib)	Pouting	Atlantic, Northeast	Marine fish	Trisopterus luscus (Linnaeus, 1758)	Pouting	3.7	21632	811	707	741	639	557	480	536	791	723	611	575	556	612	507	646	500	489	451	400	305	377	336	323	364	468	561	577	504	445	356	472	574	578	425	413	405	318	299	448
Belgium	BEL	Capture	Rainbow trout	Rainbow trout	Europe - Inland waters	Freshwater fish	Oncorhynchus mykiss (Walbaum, 1792)	Rainbow trout	4.1	180	0	0	0	0	0	0	0	0	0	0	0	0	0	0	0	0	0	0	0	0	0	0	0	0	0	0	0	0	0	0	0	0	0	0	0	20	20	20	20
Belgium	BEL	Capture	Rays and skates nei	Ray and skate	Atlantic, Northeast	Marine fish	C199	Ray and skate	3.8	53608	1759	1541	1612	1630	1448	1444	1466	1869	2180	2197	1790	1816	1572	1477	1299	1322	1385	1430	1307	1275	1363	1259	1232	1351	1231	1527	1734	1849	2012	2029	1861	1901	613	554	458	323	151	27	9
Belgium	BEL	Capture	Red gurnard	Red gurnard	Atlantic, Northeast	Marine fish	Chelidonichthys cuculus (Linnaeus, 1758)	Red gurnard	3.8	8731	0	0	0	0	0	0	0	0	0	178	0	203	198	250	166	110	140	113	119	116	145	128	157	262	418	493	500	525	318	280	313	328	352	227	237	306	306	288	263
Belgium	BEL	Capture	Roach	Roach	Europe - Inland waters	Freshwater fish	Rutilus rutilus (Linnaeus, 1758)	Roach	3	4350	0	0	0	0	0	0	0	0	0	156	154	154	160	160	160	160	160	160	160	160	160	160	160	150	160	160	160	160	160	160	160	160	160	160	160	24	24	24	24
Belgium	BEL	Capture	Saithe(=Pollock)	Saithe	Atlantic, Northeast	Marine fish	Pollachius virens (Linnaeus, 1758)	Saithe	4.3	12272	1874	1565	1145	1004	1014	558	220	237	311	225	259	254	366	412	222	276	269	223	169	236	161	264	256	208	126	30	120	47	23	30	16	20	9	28	16	3	4	4	7
Belgium	BEL	Capture	Sand sole	Sand sole	Atlantic, Northeast	Marine fish	Pegusa lascaris (Risso, 1810)	Sand sole	3.3	385	0	0	0	0	0	0	0	0	0	0	0	0	0	0	0	0	0	0	0	0	0	0	0	0	0	0	0	0	0	0	0	0	0	0	0	0	0	27	68
Belgium	BEL	Capture	Sandy ray	Sandy ray	Atlantic, Northeast	Marine fish	Leucoraja circularis (Couch, 1838)	Sandy ray	3.5	1162	0	0	0	0	0	0	0	0	0	0	0	0	0	0	0	0	0	0	0	0	0	0	0	0	0	0	0	0	0	0	0	0	0	0	40	123	129	107	90
Belgium	BEL	Capture	Sea trout	Sea trout	Europe - Inland waters	Freshwater fish	Salmo trutta Linnaeus, 1758	Sea trout	3.4	3149	0	0	0	0	0	0	0	0	0	95	100	100	100	100	100	100	100	100	100	100	100	100	100	150	100	100	100	100	100	100	100	100	100	100	100	56	56	56	56
Belgium	BEL	Capture	Various sharks nei	Shark	Atlantic, Northeast	Marine fish	C325	Shark	4.34615	410	0	0	0	0	0	0	0	0	0	0	0	0	0	24	16	16	23	22	19	20	19	18	11	14	15	18	12	12	15	16	12	12	15	9	10	2	8	10	9
Belgium	BEL	Capture	Common shrimp	Shrimp	Atlantic, Northeast	Crustacean	Crustacean	Crustacean	2.5	45168	2094	1212	854	1329	1334	1197	2225	976	984	883	622	784	723	1015	611	700	965	981	1223	1567	903	743	378	1053	616	988	538	1136	749	976	866	637	1024	1585	2078	769	880	1226	1178
Belgium	BEL	Capture	Small-spotted catshark	Small-spotted catshark	Atlantic, Northeast	Marine fish	Scyliorhinus canicula (Linnaeus, 1758)	Small-spotted catshark	3.8	2068	0	0	0	0	0	0	0	0	0	0	0	0	0	0	0	0	0	0	0	0	0	0	0	0	0	0	0	0	0	0	0	0	0	0	0	0	0	4	1
Belgium	BEL	Capture	Spotted ray	Spotted ray	Atlantic, Northeast	Marine fish	Raja montagui Fowler, 1910	Spotted ray	3.9	840	0	0	0	0	0	0	0	0	0	0	0	0	0	0	0	0	0	0	0	0	0	0	0	0	0	0	0	0	0	0	0	0	122	105	88	157	84	31	9
Belgium	BEL	Capture	Common squids nei	Squid	Atlantic, Northeast	Cephalopod	Cephalopod	Cephalopod	3	6830	97	278	86	37	22	58	116	308	238	241	271	187	265	391	544	34	64	84	57	45	21	17	25	23	59	51	137	131	106	72	81	145	101	83	100	99	134	154	192
Belgium	BEL	Capture	Surmullet	Surmullet	Atlantic, Northeast	Marine fish	Mullus surmuletus Linnaeus, 1758	Surmullet	3.5	1610	0	0	0	0	0	0	0	0	0	0	0	0	0	0	0	0	0	0	0	0	0	0	0	0	0	0	0	19	44	49	45	56	42	33	83	105	76	61	83
Belgium	BEL	Capture	Tench	Tench	Europe - Inland waters	Freshwater fish	Tinca tinca (Linnaeus, 1758)	Tench	3.7	370	0	0	0	0	0	0	0	0	0	13	15	15	15	15	15	15	15	15	15	15	15	15	15	15	15	15	15	15	0	0	0	15	15	15	15	3	3	3	3
Belgium	BEL	Capture	Thornback ray	Thornback ray	Atlantic, Northeast	Marine fish	Raja clavata Linnaeus, 1758	Thornback ray	3.8	5886	0	0	0	0	0	0	0	0	0	0	0	0	0	0	0	0	0	0	0	0	0	0	0	0	0	0	0	0	0	0	0	0	571	399	384	485	601	599	452
Belgium	BEL	Capture	Tub gurnard	Tub gurnard	Atlantic, Northeast	Marine fish	Chelidonichthys lucerna (Linnaeus, 1758)	Tub gurnard	4	10884	0	0	0	0	0	0	0	0	0	0	0	0	0	0	0	0	0	0	0	0	0	0	0	0	0	0	0	0	559	504	568	688	553	436	448	438	671	624	730
Belgium	BEL	Capture	Turbot	Turbot	Atlantic, Northeast	Marine fish	Scophthalmus maximus (Linnaeus, 1758)	Turbot	4.4	16739	318	213	232	252	237	228	243	303	356	345	292	266	254	318	442	512	456	480	480	499	382	337	327	368	464	506	445	451	415	367	373	406	357	384	334	386	417	404	437
Belgium	BEL	Capture	Whiting	Whiting	Atlantic, Northeast	Marine fish	Merlangius merlangus (Linnaeus, 1758)	Whiting	4.4	61172	3140	3517	3542	4241	3394	2939	2502	3170	3142	2530	2531	1790	2328	1730	1702	1462	1460	1319	1490	1250	1281	989	856	1072	826	732	500	456	381	381	300	254	309	324	345	256	289	357	361
Belgium	BEL	Capture	Witch flounder	Witch flounder	Atlantic, Northeast	Marine fish	Glyptocephalus cynoglossus (Linnaeus, 1758)	Witch flounder	3.2	508	0	0	0	0	0	0	0	0	0	0	0	0	0	0	0	0	0	0	0	0	0	0	0	0	0	0	0	0	0	0	0	0	0	0	0	0	2	72	80
Belgium	BEL	Capture	Groundfishes nei	Demersal fish	Atlantic, Northeast	Marine fish	Weighted mean	Demersal fish	3.64321	22143	569	489	1065	299	384	394	308	850	642	458	401	397	446	373	734	950	797	1081	1158	1027	1290	1389	979	774	643	501	509	350	387	389	366	342	273	276	254	225	214	95	12
Belgium	BEL	Capture	Pelagic fishes nei	Pelagic fish	Atlantic, Northeast	Marine fish	Weighted mean	Pelagic fish	3.64321	202	3	0	0	0	0	0	0	0	0	2	0	3	0	1	4	4	4	10	20	7	4	2	1	1	2	4	30	20	1	0	0	1	1	1	4	12	28	24	8
Belgium	BEL	Aquaculture	Common carp	Common carp	Europe - Inland waters	Freshwater fish	Cyprinus carpio Linnaeus, 1758	Common carp	3.1	3778	0	0	0	0	0	2	6	10	10	20	20	20	20	25	25	100	100	100	100	100	100	100	100	300	250	270	800	600	400	200	0	0	0	0	0	0	0	0	0
Belgium	BEL	Aquaculture	European eel	European eel	Europe - Inland waters	Freshwater fish	Anguilla anguilla (Linnaeus, 1758)	European eel	3.6	1535	0	0	0	0	0	0	0	0	0	0	0	0	0	30	30	125	125	125	125	125	125	125	125	100	100	100	75	50	25	25	0	0	0	0	0	0	0	0	0
Belgium	BEL	Aquaculture	Freshwater fishes nei	Freshwater fish	Europe - Inland waters	Freshwater fish	Weighted mean	Freshwater fish	3.52925	1448	0	0	0	0	0	0	0	0	0	0	0	0	0	0	0	0	0	0	0	0	0	0	0	0	0	0	0	0	0	0	35	35	25	430	200	20	277	39	39
Belgium	BEL	Aquaculture	North African catfish	North African catfish	Europe - Inland waters	Freshwater fish	Clarias gariepinus (Burchell, 1822)	North African catfish	3.8	1590	0	0	0	0	0	0	0	0	0	0	0	0	0	0	0	0	0	0	0	0	0	0	0	240	400	350	250	200	100	50	0	0	0	0	0	0	0	0	0
Belgium	BEL	Aquaculture	Rainbow trout	Rainbow trout	Europe - Inland waters	Freshwater fish	Oncorhynchus mykiss (Walbaum, 1792)	Rainbow trout	4.1	9839	7	12	20	32	90	145	197	245	300	300	350	380	450	450	420	420	420	420	420	420	350	300	300	470	700	700	400	200	100	75	68	68	46	46	39	81	0	173	175
Belgium	BEL	Aquaculture	Sea trout	Sea trout	Europe - Inland waters	Freshwater fish	Salmo trutta Linnaeus, 1758	Sea trout	3.4	1395	0	0	0	0	0	0	0	0	0	0	0	0	0	0	0	0	0	0	0	0	170	120	120	230	230	200	150	100	50	25	0	0	0	0	0	0	0	0	0
Belgium	BEL	Aquaculture	Tilapias nei	Tilapia	Europe - Inland waters	Freshwater fish	A39	Tilapia	2.35	3691	0	0	0	0	0	0	0	0	0	120	160	200	230	230	200	200	200	200	200	200	200	200	200	246	180	200	150	100	50	25	0	0	0	0	0	0	0	0	0
Belize	BLZ	Capture	African sicklefish	African sicklefish	Atlantic, Eastern Central	Marine fish	Drepane africana Osório, 1892	African sicklefish	3.1	3314	0	0	0	0	0	0	0	0	0	0	0	0	0	0	0	0	0	0	0	0	0	0	0	0	0	0	0	0	0	330	1418	0	690	369	207	0	300	0	0
Belize	BLZ	Capture	Albacore	Albacore	Atlantic, Northwest	Marine fish	Thunnus alalunga (Bonnaterre, 1788)	Albacore	4.3	1913	0	0	0	0	0	0	0	0	0	0	0	0	0	0	0	0	0	0	0	0	0	0	0	0	0	0	0	0	0	0	0	0	0	0	0	0	155	230	79
Belize	BLZ	Capture	Albacore	Albacore	Atlantic, Southwest	Marine fish	Thunnus alalunga (Bonnaterre, 1788)	Albacore	4.3	2049	0	0	0	0	0	0	0	0	0	0	0	0	0	0	0	0	0	0	0	0	0	0	0	0	0	0	0	0	0	0	54	32	31	213	303	286	171	54	94
Belize	BLZ	Capture	Albacore	Albacore	Atlantic, Western Central	Marine fish	Thunnus alalunga (Bonnaterre, 1788)	Albacore	4.3	854	0	0	0	0	0	0	0	0	0	0	0	0	0	0	0	0	0	0	0	0	0	0	0	0	0	0	0	0	0	0	0	22	26	39	416	351	0	0	0
Belize	BLZ	Capture	Albacore	Albacore	Indian Ocean, Eastern	Marine fish	Thunnus alalunga (Bonnaterre, 1788)	Albacore	4.3	556	0	0	0	0	0	0	0	0	0	0	0	0	0	0	0	0	0	0	0	0	0	0	0	0	0	82	34	78	47	278	0	12	9	0	0	16	0	0	0
Belize	BLZ	Capture	Albacore	Albacore	Indian Ocean, Western	Marine fish	Thunnus alalunga (Bonnaterre, 1788)	Albacore	4.3	4681	0	0	0	0	0	0	0	0	0	0	0	0	0	0	0	0	0	0	0	0	0	0	0	0	0	1358	550	74	44	412	631	874	288	161	141	148	0	0	0
Belize	BLZ	Capture	Albacore	Albacore	Pacific, Western Central	Marine fish	Thunnus alalunga (Bonnaterre, 1788)	Albacore	4.3	9381	0	0	0	0	0	0	0	0	0	0	0	0	0	0	0	0	0	0	0	0	0	0	182	4	194	4864	1853	972	416	313	271	164	7	26	10	105	0	0	0
Belize	BLZ	Capture	Alfonsinos nei	Alfonsino	Pacific, Southwest	Marine fish	C5	Alfonsino	4.2	566	0	0	0	0	0	0	0	0	0	0	0	0	0	0	0	0	0	0	0	0	0	0	0	0	0	0	0	73	229	102	101	61	0	0	0	0	0	0	0
Belize	BLZ	Capture	Carangids nei	Amberjack, jack, trevally, scad, pompano	Atlantic, Eastern Central	Marine fish	C23	Amberjack and jack and trevally and scad and pompano	3.9	3693	0	0	0	0	0	0	0	0	0	0	0	0	0	0	0	0	0	0	0	0	0	0	0	0	0	0	99	0	0	122	1062	0	907	441	208	56	798	0	0
Belize	BLZ	Capture	Argentine hake	Argentine hake	Atlantic, Southwest	Marine fish	Merluccius hubbsi Marini, 1933	Argentine hake	4.2	102	0	0	0	0	0	0	0	0	0	0	0	0	0	0	0	0	0	0	0	0	0	0	0	35	63	4	0	0	0	0	0	0	0	0	0	0	0	0	0
Belize	BLZ	Capture	Atlantic chub mackerel	Atlantic chub mackerel	Atlantic, Eastern Central	Marine fish	Scomber colias Gmelin, 1789	Atlantic chub mackerel	3.9	374716	0	0	0	0	0	0	0	0	0	0	0	0	0	0	0	0	0	0	0	0	0	1100	1051	1732	2139	971	7641	5690	6530	4627	7960	24331	27030	16778	36733	22967	11393	1912	10373
Belize	BLZ	Capture	Atlantic sailfish	Atlantic sailfish	Atlantic, Northwest	Marine fish	Istiophorus albicans (Latreille, 1804)	Atlantic sailfish	4.5	171.75	0	0	0	0	0	0	0	0	0	0	0	0	0	0	0	0	0	0	0	0	0	0	0	0	0	0	0	0	0	0	0	0	0	0	0	0	0.47	3.28	2.49
Belize	BLZ	Capture	Barracudas nei	Barracuda	Atlantic, Eastern Central	Marine fish	C11	Barracuda	4.46667	759	0	0	0	0	0	0	0	0	0	0	0	0	0	0	0	0	0	0	0	0	0	0	0	0	0	0	0	0	0	45	133	0	201	121	29	113	117	0	0
Belize	BLZ	Capture	Bigeye tuna	Bigeye tuna	Atlantic, Eastern Central	Marine fish	Thunnus obesus (Lowe, 1839)	Bigeye tuna	4.5	12842	0	0	0	0	0	0	0	0	0	0	0	0	0	0	0	0	0	0	0	0	0	0	0	0	0	0	0	0	0	0	0	0	0	186	246	704	1246	1274	1362
Belize	BLZ	Capture	Bigeye tuna	Bigeye tuna	Atlantic, Southwest	Marine fish	Thunnus obesus (Lowe, 1839)	Bigeye tuna	4.5	1289	0	0	0	0	0	0	0	0	0	0	0	0	0	0	0	0	0	0	0	0	0	0	0	0	0	0	0	0	0	0	4	24	27	14	10	397	8	68	110
Belize	BLZ	Capture	Bigeye tuna	Bigeye tuna	Atlantic, Western Central	Marine fish	Thunnus obesus (Lowe, 1839)	Bigeye tuna	4.5	1792	0	0	0	0	0	0	0	0	0	0	0	0	0	0	0	0	0	0	0	0	0	0	0	0	0	0	0	0	0	0	0	36	44	46	38	159	0	0	0
Belize	BLZ	Capture	Bigeye tuna	Bigeye tuna	Indian Ocean, Eastern	Marine fish	Thunnus obesus (Lowe, 1839)	Bigeye tuna	4.5	641	0	0	0	0	0	0	0	0	0	0	0	0	0	0	0	0	0	0	0	0	0	0	0	0	0	195	256	90	77	21	0	0	1	0	0	1	0	0	0
Belize	BLZ	Capture	Bigeye tuna	Bigeye tuna	Indian Ocean, Western	Marine fish	Thunnus obesus (Lowe, 1839)	Bigeye tuna	4.5	6641	0	0	0	0	0	0	0	0	0	0	0	0	0	0	0	0	0	0	0	0	0	0	0	0	0	2114	2538	525	447	108	30	150	119	16	31	9	391	33	130
Belize	BLZ	Capture	Bigeye tuna	Bigeye tuna	Pacific, Eastern Central	Marine fish	Thunnus obesus (Lowe, 1839)	Bigeye tuna	4.5	224	0	0	0	0	0	0	0	0	0	0	0	0	0	0	0	0	0	0	0	120	0	20	10	0	43	31	0	0	0	0	0	0	0	0	0	0	0	0	0
Belize	BLZ	Capture	Bigeye tuna	Bigeye tuna	Pacific, Southeast	Marine fish	Thunnus obesus (Lowe, 1839)	Bigeye tuna	4.5	13107	0	0	0	0	0	0	0	0	0	0	0	0	0	0	0	0	0	0	2360	1150	2600	4700	1150	320	555	272	0	0	0	0	0	0	0	0	0	0	0	0	0
Belize	BLZ	Capture	Bigeye tuna	Bigeye tuna	Pacific, Western Central	Marine fish	Thunnus obesus (Lowe, 1839)	Bigeye tuna	4.5	5247	0	0	0	0	0	0	0	0	0	0	0	0	0	0	0	0	0	0	0	35	49	21	48	141	14	1322	812	782	297	425	254	158	89	43	89	102	132	217	217
Belize	BLZ	Capture	Black marlin	Black marlin	Pacific, Western Central	Marine fish	Istiompax indica (Cuvier, 1832)	Black marlin	4.5	112	0	0	0	0	0	0	0	0	0	0	0	0	0	0	0	0	0	0	0	4	0	0	5	16	11	0	0	0	0	0	0	27	37	10	0	0	0	1	1
Belize	BLZ	Capture	Blue butterfish	Blue butterfish	Atlantic, Eastern Central	Marine fish	Stromateus fiatola Linnaeus, 1758	Blue butterfish	4	200	0	0	0	0	0	0	0	0	0	0	0	0	0	0	0	0	0	0	0	0	0	0	0	0	0	0	0	0	0	0	0	0	0	200	0	0	0	0	0
Belize	BLZ	Capture	Blue marlin	Blue marlin	Indian Ocean, Western	Marine fish	Makaira nigricans Lacepède, 1802	Blue marlin	4.5	322	0	0	0	0	0	0	0	0	0	0	0	0	0	0	0	0	0	0	0	0	0	0	0	0	0	110	59	30	18	11	0	10	3	0	0	0	29	11	41
Belize	BLZ	Capture	Blue marlin	Blue marlin	Pacific, Western Central	Marine fish	Makaira nigricans Lacepède, 1802	Blue marlin	4.5	158	0	0	0	0	0	0	0	0	0	0	0	0	0	0	0	0	0	0	0	2	1	1	3	6	1	0	0	0	0	0	0	52	13	10	29	3	19	9	9
Belize	BLZ	Capture	Blue shark	Blue shark	Atlantic, Northwest	Marine fish	Prionace glauca (Linnaeus, 1758)	Blue shark	4.4	3400	0	0	0	0	0	0	0	0	0	0	0	0	0	0	0	0	0	0	0	0	0	0	0	0	0	0	0	0	0	0	0	0	0	0	0	0	903	1216	392
Belize	BLZ	Capture	Blue shark	Blue shark	Atlantic, Southeast	Marine fish	Prionace glauca (Linnaeus, 1758)	Blue shark	4.4	591	0	0	0	0	0	0	0	0	0	0	0	0	0	0	0	0	0	0	0	0	0	0	0	0	0	0	0	0	0	0	0	0	0	0	0	0	0	47	6
Belize	BLZ	Capture	Blue shark	Blue shark	Atlantic, Southwest	Marine fish	Prionace glauca (Linnaeus, 1758)	Blue shark	4.4	2308	0	0	0	0	0	0	0	0	0	0	0	0	0	0	0	0	0	0	0	0	0	0	0	0	0	0	0	0	37	259	0	236	109	0	273	238	483	187	165
Belize	BLZ	Capture	Blue shark	Blue shark	Atlantic, Western Central	Marine fish	Prionace glauca (Linnaeus, 1758)	Blue shark	4.4	1614	0	0	0	0	0	0	0	0	0	0	0	0	0	0	0	0	0	0	0	0	0	0	0	0	0	0	0	0	0	0	0	0	0	114	461	1039	0	0	0
Belize	BLZ	Capture	Chilean jack mackerel	Chilean jack mackerel	Pacific, Southeast	Marine fish	Trachurus murphyi Nichols, 1920	Chilean jack mackerel	3.3	37099	0	0	0	0	0	0	0	0	0	0	0	0	0	0	0	0	0	0	0	0	0	0	0	0	0	0	0	0	0	867	481	12585	15245	5681	2240	0	0	0	0
Belize	BLZ	Capture	Pacific chub mackerel	Chub mackerel	Pacific, Southeast	Marine fish	Scomber japonicus Houttuyn, 1782	Chub mackerel	3.4	2386	0	0	0	0	0	0	0	0	0	0	0	0	0	0	0	0	0	0	0	0	0	0	0	0	0	0	0	0	0	0	0	966	1104	295	21	0	0	0	0
Belize	BLZ	Capture	Black stone crab	Crab	Atlantic, Western Central	Crustacean	Crustacean	Crustacean	2.5	742	0	0	0	0	0	73	35	6	10	7	9	17	23	14	13	13	14	14	20	28	53	210	25	29	16	8	4	2	13	16	13	4	5	6	7	7	7	7	6
Belize	BLZ	Capture	Croakers, drums nei	Croaker, drum	Atlantic, Eastern Central	Marine fish	C41	Croaker and drum	4.03333	5957	0	0	0	0	0	0	0	0	0	0	0	0	0	0	0	0	0	17	3	67	0	1	65	299	240	0	0	6	0	5189	6	56	8	0	0	0	0	0	0
Belize	BLZ	Capture	European anchovy	European anchovy	Atlantic, Eastern Central	Marine fish	Engraulis encrasicolus (Linnaeus, 1758)	European anchovy	3.1	202535	0	0	0	0	0	0	0	0	0	0	0	0	0	0	0	0	0	0	0	0	0	300	278	3251	3234	1645	11180	6690	6760	3836	14068	28759	19977	29341	31956	29245	11365	18	10
Belize	BLZ	Capture	European pilchard(=Sardine)	European pilchard	Atlantic, Eastern Central	Marine fish	Sardina pilchardus (Walbaum, 1792)	European pilchard	3.1	181277	0	0	0	0	0	0	0	0	0	0	0	0	0	0	0	0	0	0	0	0	0	2126	2229	616	398	128	3727	2652	1375	5214	23533	25479	19024	20192	14402	29849	4514	2820	425
Belize	BLZ	Capture	Flatfishes nei	Flatfish	Atlantic, Eastern Central	Marine fish	C61	Flatfish	3.7	789	0	0	0	0	0	0	0	0	0	0	0	0	0	0	0	0	0	0	0	0	0	0	0	0	0	0	0	0	0	0	0	0	0	0	0	0	0	0	0
Belize	BLZ	Capture	Frigate tuna	Frigate tuna	Atlantic, Eastern Central	Marine fish	Auxis thazard (Lacepède, 1800)	Frigate tuna	4.4	1028	0	0	0	0	0	0	0	0	0	0	0	0	0	0	0	0	0	0	0	0	0	0	0	0	0	0	0	0	0	0	0	0	0	100	154	71	0	0	0
Belize	BLZ	Capture	Frigate tuna	Frigate tuna	Atlantic, Northeast	Marine fish	Auxis thazard (Lacepède, 1800)	Frigate tuna	4.4	1098	0	0	0	0	0	0	0	0	0	0	0	0	0	0	0	0	0	0	0	0	0	0	0	0	0	0	0	0	0	0	0	0	0	0	0	0	0	0	0
Belize	BLZ	Capture	Frigate tuna	Frigate tuna	Atlantic, Southeast	Marine fish	Auxis thazard (Lacepède, 1800)	Frigate tuna	4.4	1347	0	0	0	0	0	0	0	0	0	0	0	0	0	0	0	0	0	0	0	0	0	0	0	0	0	0	0	0	0	0	0	0	0	0	0	0	86	78	143
Belize	BLZ	Capture	Grunts, sweetlips nei	Grunt, sweetlips	Atlantic, Eastern Central	Marine fish	C96	Grunt and sweetlips	3.48	1111	0	0	0	0	0	0	0	0	0	0	0	0	0	0	0	0	0	0	0	0	0	0	0	0	0	0	18	0	0	534	93	0	242	0	67	69	88	0	0
Belize	BLZ	Capture	Hakes nei	Hake	Atlantic, Eastern Central	Marine fish	C114	Hake	4.45	4356.93	0	0	0	0	0	0	0	0	0	0	0	0	0	0	0	0	0	0	0	0	0	30	29	65	1	8	21	77	56	2	135	49	83	161	272	349	214	49	211
Belize	BLZ	Capture	Jack and horse mackerels nei	Jack and horse mackerel	Atlantic, Eastern Central	Marine fish	C122	Jack and horse mackerel	3.5	1.40288e+06	0	0	0	0	0	0	0	0	0	0	0	0	0	0	0	0	0	4	0	0	0	1600	1626	5924	2764	3145	10575	10899	36694	40758	87864	128654	192114	166413	229972	113105	58580	5285	23894
Belize	BLZ	Capture	Largehead hairtail	Largehead hairtail	Atlantic, Eastern Central	Marine fish	Trichiurus lepturus Linnaeus, 1758	Largehead hairtail	4.4	28234.6	0	0	0	0	0	0	0	0	0	0	0	0	0	0	0	0	0	0	0	0	0	300	317	1121	200	7	94	528	4632	5111	2490	4900	1489	317	1353	1686	1433	163	180
Belize	BLZ	Capture	Little tunny(=Atl.black skipj)	Little tunny	Atlantic, Eastern Central	Marine fish	Euthynnus alletteratus (Rafinesque, 1810)	Little tunny	4.5	292	0	0	0	0	0	0	0	0	0	0	0	0	0	0	0	0	0	0	0	0	0	0	0	0	0	0	0	0	0	0	0	0	0	18	223	51	0	0	0
Belize	BLZ	Capture	Little tunny(=Atl.black skipj)	Little tunny	Atlantic, Southeast	Marine fish	Euthynnus alletteratus (Rafinesque, 1810)	Little tunny	4.5	521	0	0	0	0	0	0	0	0	0	0	0	0	0	0	0	0	0	0	0	0	0	0	0	0	0	0	0	0	0	0	0	0	0	0	0	0	238	144	133
Belize	BLZ	Capture	Caribbean spiny lobster	Lobster	Atlantic, Western Central	Crustacean	Crustacean	Crustacean	2.5	23912	634	504	573	663	369	678	582	602	576	654	467	474	526	487	383	493	463	388	490	608	448	534	468	552	503	394	525	541	555	439	573	630	642	624	672	833	660	652	650
Belize	BLZ	Capture	Palinurid spiny lobsters nei	Lobster	Atlantic, Eastern Central	Crustacean	Crustacean	Crustacean	2.5	121	0	0	0	0	0	0	0	0	0	0	0	0	0	0	0	0	0	0	0	0	0	0	0	0	0	0	0	0	0	0	0	0	119	0	2	0	0	0	0
Belize	BLZ	Capture	Marine fishes nei	Marine fish	Atlantic, Eastern Central	Marine fish	Weighted mean	Marine fish	3.50295	54209.7	0	0	0	0	0	0	0	0	0	0	0	0	0	0	0	0	0	80	7	27	0	372	1611	5211	673	238	1926	862	424	6425	2839	313	1563	2702	2060	2229	1454.35	232.89	692.64
Belize	BLZ	Capture	Marine fishes nei	Marine fish	Atlantic, Southwest	Marine fish	Weighted mean	Marine fish	4.21516	272	0	0	0	0	0	0	0	0	0	0	0	0	0	0	0	0	0	0	0	0	0	0	0	7	222	43	0	0	0	0	0	0	0	0	0	0	0	0	0
Belize	BLZ	Capture	Marine fishes nei	Marine fish	Atlantic, Western Central	Marine fish	Weighted mean	Marine fish	4.41511	9268	189	490	403	296	380	299	388	507	303	304	413	462	414	304	295	394	317	217	145	166	400	121	133	202	119	66	83	60	44	54	70	93	52	19	74	148	207	280	181
Belize	BLZ	Capture	Marine fishes nei	Marine fish	Indian Ocean, Western	Marine fish	Weighted mean	Marine fish	4.40034	569	0	0	0	0	0	0	0	0	0	0	0	0	0	0	0	0	0	0	0	0	0	0	0	0	0	0	327	0	0	0	0	224	0	18	0	0	0	0	0
Belize	BLZ	Capture	Mullets nei	Mullet	Atlantic, Eastern Central	Marine fish	C167	Mullet	2.8	1721.82	0	0	0	0	0	0	0	0	0	0	0	0	0	0	0	0	0	0	0	0	0	0	0	0	0	0	0	0	0	0	0	0	0	0	0	0	0	0	0
Belize	BLZ	Capture	Octopuses, etc. nei	Octopus	Atlantic, Eastern Central	Cephalopod	Cephalopod	Cephalopod	3	4698	0	0	0	0	0	0	0	0	0	0	0	0	0	0	0	0	0	17	0	86	0	185	785	3247	57	0	0	65	0	253	0	3	0	0	0	0	0	0	0
Belize	BLZ	Capture	Orange roughy	Orange roughy	Pacific, Southwest	Marine fish	Hoplostethus atlanticus Collett, 1889	Orange roughy	4.3	1961	0	0	0	0	0	0	0	0	0	0	0	0	0	0	0	0	0	0	0	0	0	0	0	0	0	0	0	9	914	506	200	332	0	0	0	0	0	0	0
Belize	BLZ	Capture	Patagonian grenadier	Patagonian grenadier	Atlantic, Southwest	Marine fish	Macruronus magellanicus Lönnberg, 1907	Patagonian grenadier	3.9	2179	0	0	0	0	0	0	0	0	0	0	0	0	0	0	0	0	0	0	0	0	0	0	0	84	1720	374	1	0	0	0	0	0	0	0	0	0	0	0	0
Belize	BLZ	Capture	Pink cusk-eel	Pink cusk-eel	Atlantic, Southwest	Marine fish	Genypterus blacodes (Forster, 1801)	Pink cusk-eel	4.2	110	0	0	0	0	0	0	0	0	0	0	0	0	0	0	0	0	0	0	0	0	0	0	0	15	87	8	0	0	0	0	0	0	0	0	0	0	0	0	0
Belize	BLZ	Capture	Porgies, seabreams nei	Porgy, seabream	Atlantic, Eastern Central	Marine fish	C188	Porgy and seabream	3.55	9430.45	0	0	0	0	0	0	0	0	0	0	0	0	0	0	0	0	0	54	7	88	0	183	1152	2826	629	15	237	41	123	240	100	78	379	417	540	304	89	34	20
Belize	BLZ	Capture	Rays, stingrays, mantas nei	Ray, stingray, manta	Atlantic, Southwest	Marine fish	C203	Ray and stingray and manta	3.4125	778	0	0	0	0	0	0	0	0	0	0	0	0	0	0	0	0	0	0	0	0	0	0	0	519	48	201	10	0	0	0	0	0	0	0	0	0	0	0	0
Belize	BLZ	Capture	Grenadiers, rattails nei	Ridge scaled rattail	Pacific, Southeast	Marine fish	Macrourus carinatus (Günther, 1878)	Ridge scaled rattail	3.7	525	0	0	0	0	0	0	0	0	0	0	0	0	0	0	0	0	0	0	0	0	0	0	0	0	0	0	0	0	525	0	0	0	0	0	0	0	0	0	0
Belize	BLZ	Capture	Sardinellas nei	Sardine	Atlantic, Eastern Central	Marine fish	C209	Sardine	3.16667	559073	0	0	0	0	0	0	0	0	0	0	0	0	0	0	0	0	0	0	0	0	0	2400	2389	7233	2343	887	12547	5354	5474	16130	36826	68910	76473	53166	68439	56727	50422	3140	15503
Belize	BLZ	Capture	Sharks, rays, skates, etc. nei	Shark, ray, skate	Indian Ocean, Eastern	Marine fish	C330	Shark and ray and skate	4.28333	913	0	0	0	0	0	0	0	0	0	0	0	0	0	0	0	0	0	0	0	0	0	0	0	0	0	0	913	0	0	0	0	0	0	0	0	0	0	0	0
Belize	BLZ	Capture	Sharks, rays, skates, etc. nei	Shark, ray, skate	Indian Ocean, Western	Marine fish	C332	Shark and ray and skate	4.33125	4289	0	0	0	0	0	0	0	0	0	0	0	0	0	0	0	0	0	0	0	0	0	0	0	0	0	0	4243	0	0	0	33	11	2	0	0	0	0	0	0
Belize	BLZ	Capture	Shortfin mako	Shortfin mako	Atlantic, Northeast	Marine fish	Isurus oxyrinchus Rafinesque, 1810	Shortfin mako	4.5	215	0	0	0	0	0	0	0	0	0	0	0	0	0	0	0	0	0	0	0	0	0	0	0	0	0	0	0	0	0	0	0	0	0	0	0	0	114	99	1
Belize	BLZ	Capture	Shortfin mako	Shortfin mako	Atlantic, Southwest	Marine fish	Isurus oxyrinchus Rafinesque, 1810	Shortfin mako	4.5	333	0	0	0	0	0	0	0	0	0	0	0	0	0	0	0	0	0	0	0	0	0	0	0	0	0	0	0	0	0	38	0	17	2	0	32	56	78	86	1
Belize	BLZ	Capture	Shortfin mako	Shortfin mako	Atlantic, Western Central	Marine fish	Isurus oxyrinchus Rafinesque, 1810	Shortfin mako	4.5	120	0	0	0	0	0	0	0	0	0	0	0	0	0	0	0	0	0	0	0	0	0	0	0	0	0	0	0	0	0	0	0	0	0	23	28	69	0	0	0
Belize	BLZ	Capture	Natantian decapods nei	Shrimp	Atlantic, Eastern Central	Crustacean	Crustacean	Crustacean	2.5	1574	0	0	0	0	0	0	0	0	0	0	0	0	0	0	0	0	0	0	0	0	0	0	2	28	1	8	0	29	0	395	15	0	6	0	0	1090	0	0	0
Belize	BLZ	Capture	Penaeus shrimps nei	Shrimp	Atlantic, Eastern Central	Crustacean	Crustacean	Crustacean	2.5	3435	0	0	0	0	0	0	0	0	0	0	0	0	0	0	0	0	0	0	0	0	0	0	549	1283	511	0	9	56	0	3	111	871	42	0	0	0	0	0	0
Belize	BLZ	Capture	Penaeus shrimps nei	Shrimp	Atlantic, Western Central	Crustacean	Crustacean	Crustacean	2.5	1846	43	43	47	40	58	30	15	10	2	55	71	114	118	132	87	64	48	28	34	49	38	43	40	35	45	69	81	104	147	52	33	19	26	22	4	0	0	0	0
Belize	BLZ	Capture	Skipjack tuna	Skipjack tuna	Atlantic, Eastern Central	Marine fish	Katsuwonus pelamis (Linnaeus, 1758)	Skipjack tuna	4.4	110679	0	0	0	0	0	0	0	0	0	0	0	0	0	0	0	0	0	0	0	0	0	0	0	0	0	0	0	0	0	0	0	0	0	1487	3109	7797	15733	6854	11080
Belize	BLZ	Capture	Skipjack tuna	Skipjack tuna	Atlantic, Northeast	Marine fish	Katsuwonus pelamis (Linnaeus, 1758)	Skipjack tuna	4.4	1331	0	0	0	0	0	0	0	0	0	0	0	0	0	0	0	0	0	0	0	0	0	0	0	0	0	0	0	0	0	0	0	0	0	0	0	0	0	0	0
Belize	BLZ	Capture	Skipjack tuna	Skipjack tuna	Atlantic, Southeast	Marine fish	Katsuwonus pelamis (Linnaeus, 1758)	Skipjack tuna	4.4	2148	0	0	0	0	0	0	0	0	0	0	0	0	0	0	0	0	0	0	0	0	0	0	0	0	0	0	0	0	0	0	0	0	0	0	0	0	0	0	0
Belize	BLZ	Capture	Skipjack tuna	Skipjack tuna	Atlantic, Southwest	Marine fish	Katsuwonus pelamis (Linnaeus, 1758)	Skipjack tuna	4.4	164	0	0	0	0	0	0	0	0	0	0	0	0	0	0	0	0	0	0	0	0	0	0	0	0	0	0	0	0	0	0	0	0	0	0	0	0	0	0	0
Belize	BLZ	Capture	Skipjack tuna	Skipjack tuna	Indian Ocean, Eastern	Marine fish	Katsuwonus pelamis (Linnaeus, 1758)	Skipjack tuna	4.4	334	0	0	0	0	0	0	0	0	0	0	0	0	0	0	0	0	0	0	0	0	0	0	0	0	0	75	259	0	0	0	0	0	0	0	0	0	0	0	0
Belize	BLZ	Capture	Skipjack tuna	Skipjack tuna	Indian Ocean, Western	Marine fish	Katsuwonus pelamis (Linnaeus, 1758)	Skipjack tuna	4.4	15957	0	0	0	0	0	0	0	0	0	0	0	0	0	0	0	0	0	0	0	0	0	0	0	0	0	1894	14039	0	0	4	20	0	0	0	0	0	0	0	0
Belize	BLZ	Capture	Skipjack tuna	Skipjack tuna	Pacific, Eastern Central	Marine fish	Katsuwonus pelamis (Linnaeus, 1758)	Skipjack tuna	4.4	2683	0	0	0	0	0	0	0	0	0	0	0	0	0	0	0	0	0	0	20	70	720	500	290	880	189	14	0	0	0	0	0	0	0	0	0	0	0	0	0
Belize	BLZ	Capture	Skipjack tuna	Skipjack tuna	Pacific, Southeast	Marine fish	Katsuwonus pelamis (Linnaeus, 1758)	Skipjack tuna	4.4	30776	0	0	0	0	0	0	0	0	0	0	0	0	0	0	0	0	0	10	2020	5090	4420	5760	4150	3450	5093	783	0	0	0	0	0	0	0	0	0	0	0	0	0
Belize	BLZ	Capture	Sea catfishes nei	Smoothmouth sea catfish	Atlantic, Eastern Central	Marine fish	Carlarius heudelotii (Valenciennes, 1840)	Smoothmouth sea catfish	3.8	4892	0	0	0	0	0	0	0	0	0	0	0	0	0	0	0	0	0	0	0	0	0	0	0	0	0	0	15	0	0	3409	375	0	408	120	139	107	319	0	0
Belize	BLZ	Capture	Southern blue whiting	Southern blue whiting	Atlantic, Southwest	Marine fish	Micromesistius australis Norman, 1937	Southern blue whiting	3.3	463	0	0	0	0	0	0	0	0	0	0	0	0	0	0	0	0	0	0	0	0	0	0	0	0	257	206	0	0	0	0	0	0	0	0	0	0	0	0	0
Belize	BLZ	Capture	Southern bluefin tuna	Southern bluefin tuna	Indian Ocean, Western	Marine fish	Thunnus maccoyii (Castelnau, 1872)	Southern bluefin tuna	3.9	221	0	0	0	0	0	0	0	0	0	0	0	0	0	0	0	0	0	0	0	0	0	0	0	0	0	123	98	0	0	0	0	0	0	0	0	0	0	0	0
Belize	BLZ	Capture	Argentine shortfin squid	Squid	Atlantic, Southwest	Cephalopod	Cephalopod	Cephalopod	3	14839	0	0	0	0	0	0	0	0	0	0	0	0	0	0	0	0	0	0	0	0	0	0	0	3796	4066	1692	124	2768	47	61	0	2285	0	0	0	0	0	0	0
Belize	BLZ	Capture	Cuttlefish, bobtail squids nei	Squid	Atlantic, Eastern Central	Cephalopod	Cephalopod	Cephalopod	3	8845	0	0	0	0	0	0	0	0	0	0	0	0	0	0	0	0	0	460	80	141	0	406	2445	4911	201	1	0	7	0	64	28	46	12	0	0	27	14	0	0
Belize	BLZ	Capture	Various squids nei	Squid	Atlantic, Eastern Central	Cephalopod	Cephalopod	Cephalopod	3	404.29	0	0	0	0	0	0	0	0	0	0	0	0	0	0	0	0	0	0	0	48	0	21	114	128	16	0	0	0	4	0	0	3	0	0	19	1	5	0	0
Belize	BLZ	Capture	Various squids nei	Squid	Pacific, Southeast	Cephalopod	Cephalopod	Cephalopod	3	3026	0	0	0	0	0	0	0	0	0	0	0	0	0	0	0	0	0	0	0	0	0	0	0	0	0	453	588	479	681	825	0	0	0	0	0	0	0	0	0
Belize	BLZ	Capture	Striped marlin	Striped marlin	Indian Ocean, Western	Marine fish	Kajikia audax (Philippi, 1887)	Striped marlin	4.5	148	0	0	0	0	0	0	0	0	0	0	0	0	0	0	0	0	0	0	0	0	0	0	0	0	0	63	32	14	14	9	0	3	0	0	0	2	7	1	3
Belize	BLZ	Capture	Swordfish	Swordfish	Atlantic, Northeast	Marine fish	Xiphias gladius Linnaeus, 1758	Swordfish	4.5	187	0	0	0	0	0	0	0	0	0	0	0	0	0	0	0	0	0	0	0	0	0	0	0	0	0	0	0	0	0	0	0	0	0	0	0	0	0	0	0
Belize	BLZ	Capture	Swordfish	Swordfish	Atlantic, Northwest	Marine fish	Xiphias gladius Linnaeus, 1758	Swordfish	4.5	497	0	0	0	0	0	0	0	0	0	0	0	0	0	0	0	0	0	0	0	0	0	0	0	0	0	0	0	0	0	0	0	0	0	0	0	0	141	142	76
Belize	BLZ	Capture	Swordfish	Swordfish	Atlantic, Southeast	Marine fish	Xiphias gladius Linnaeus, 1758	Swordfish	4.5	434	0	0	0	0	0	0	0	0	0	0	0	0	0	0	0	0	0	0	0	0	0	0	0	0	0	0	0	0	0	0	0	0	0	0	0	0	0	11	1
Belize	BLZ	Capture	Swordfish	Swordfish	Atlantic, Southwest	Marine fish	Xiphias gladius Linnaeus, 1758	Swordfish	4.5	1161	0	0	0	0	0	0	0	0	0	0	0	0	0	0	0	0	0	0	0	0	0	0	0	0	0	0	0	0	0	0	0	120	32	112	121	207	197	125	45
Belize	BLZ	Capture	Swordfish	Swordfish	Atlantic, Western Central	Marine fish	Xiphias gladius Linnaeus, 1758	Swordfish	4.5	412	0	0	0	0	0	0	0	0	0	0	0	0	0	0	0	0	0	0	0	0	0	0	0	0	0	0	0	0	0	0	0	9	1	112	106	184	0	0	0
Belize	BLZ	Capture	Swordfish	Swordfish	Indian Ocean, Eastern	Marine fish	Xiphias gladius Linnaeus, 1758	Swordfish	4.5	179	0	0	0	0	0	0	0	0	0	0	0	0	0	0	0	0	0	0	0	0	0	0	0	0	0	73	46	34	21	3	0	1	0	0	0	1	0	0	0
Belize	BLZ	Capture	Swordfish	Swordfish	Indian Ocean, Western	Marine fish	Xiphias gladius Linnaeus, 1758	Swordfish	4.5	1449	0	0	0	0	0	0	0	0	0	0	0	0	0	0	0	0	0	0	0	0	0	0	0	0	0	603	322	151	93	39	28	64	75	22	7	2	32	2	9
Belize	BLZ	Capture	Swordfish	Swordfish	Pacific, Western Central	Marine fish	Xiphias gladius Linnaeus, 1758	Swordfish	4.5	889	0	0	0	0	0	0	0	0	0	0	0	0	0	0	0	0	0	0	0	2	0	0	2	8	3	128	10	417	117	44	23	7	4	2	7	19	10	43	43
Belize	BLZ	Capture	Tadpole codling	Tadpole codling	Atlantic, Southwest	Marine fish	Salilota australis (Günther, 1878)	Tadpole codling	4.4	307	0	0	0	0	0	0	0	0	0	0	0	0	0	0	0	0	0	0	0	0	0	0	0	28	237	42	0	0	0	0	0	0	0	0	0	0	0	0	0
Belize	BLZ	Capture	Tuna-like fishes nei	Tuna, bonito	Atlantic, Eastern Central	Marine fish	C309	Tuna and bonito	4.45556	4852	0	0	0	0	0	0	0	0	0	0	0	0	0	0	0	0	0	0	0	0	0	0	0	107	106	125	172	111	417	240	1167	371	2035	0	0	0	0	0	0
Belize	BLZ	Capture	Tuna-like fishes nei	Tuna, bonito	Indian Ocean, Western	Marine fish	C312	Tuna and bonito	4.45385	600	0	0	0	0	0	0	0	0	0	0	0	0	0	0	0	0	0	0	0	0	0	0	0	0	0	0	600	0	0	0	0	0	0	0	0	0	0	0	0
Belize	BLZ	Capture	Yellowfin tuna	Yellowfin tuna	Atlantic, Eastern Central	Marine fish	Thunnus albacares (Bonnaterre, 1788)	Yellowfin tuna	4.4	50941.3	0	0	0	0	0	0	0	0	0	0	0	0	0	0	0	0	0	0	0	0	0	0	0	0	0	0	0	0	0	0	0	0	0	425	1844	3242	5888.39	5295.16	7069.75
Belize	BLZ	Capture	Yellowfin tuna	Yellowfin tuna	Atlantic, Northeast	Marine fish	Thunnus albacares (Bonnaterre, 1788)	Yellowfin tuna	4.4	546	0	0	0	0	0	0	0	0	0	0	0	0	0	0	0	0	0	0	0	0	0	0	0	0	0	0	0	0	0	0	0	0	0	0	0	0	0	0	0
Belize	BLZ	Capture	Yellowfin tuna	Yellowfin tuna	Atlantic, Northwest	Marine fish	Thunnus albacares (Bonnaterre, 1788)	Yellowfin tuna	4.4	1592.63	0	0	0	0	0	0	0	0	0	0	0	0	0	0	0	0	0	0	0	0	0	0	0	0	0	0	0	0	0	0	0	0	0	0	0	0	0	0	23.76
Belize	BLZ	Capture	Yellowfin tuna	Yellowfin tuna	Atlantic, Southeast	Marine fish	Thunnus albacares (Bonnaterre, 1788)	Yellowfin tuna	4.4	6012.51	0	0	0	0	0	0	0	0	0	0	0	0	0	0	0	0	0	0	0	0	0	0	0	0	0	0	0	0	0	0	0	0	0	0	0	0	0	21.33	2.04
Belize	BLZ	Capture	Yellowfin tuna	Yellowfin tuna	Atlantic, Southwest	Marine fish	Thunnus albacares (Bonnaterre, 1788)	Yellowfin tuna	4.4	1395.17	0	0	0	0	0	0	0	0	0	0	0	0	0	0	0	0	0	0	0	0	0	0	0	0	0	0	0	0	0	0	143	527	679	0	0	9	17.79	10.26	9.09
Belize	BLZ	Capture	Yellowfin tuna	Yellowfin tuna	Atlantic, Western Central	Marine fish	Thunnus albacares (Bonnaterre, 1788)	Yellowfin tuna	4.4	4937.96	0	0	0	0	0	0	0	0	0	0	0	0	0	0	0	0	0	0	0	0	0	0	0	0	0	0	0	0	0	0	0	637	482	941	264	32	23	28	0
Belize	BLZ	Capture	Yellowfin tuna	Yellowfin tuna	Indian Ocean, Eastern	Marine fish	Thunnus albacares (Bonnaterre, 1788)	Yellowfin tuna	4.4	525	0	0	0	0	0	0	0	0	0	0	0	0	0	0	0	0	0	0	0	0	0	0	0	0	0	103	235	71	89	24	0	1	0	0	0	2	0	0	0
Belize	BLZ	Capture	Yellowfin tuna	Yellowfin tuna	Indian Ocean, Western	Marine fish	Thunnus albacares (Bonnaterre, 1788)	Yellowfin tuna	4.4	8839	0	0	0	0	0	0	0	0	0	0	0	0	0	0	0	0	0	0	0	0	0	0	0	0	0	2350	5188	271	339	155	127	114	92	51	14	11	69	12	46
Belize	BLZ	Capture	Yellowfin tuna	Yellowfin tuna	Pacific, Eastern Central	Marine fish	Thunnus albacares (Bonnaterre, 1788)	Yellowfin tuna	4.4	2008	0	0	0	0	0	0	0	0	0	0	0	0	0	0	0	0	0	0	190	10	670	590	380	90	68	10	0	0	0	0	0	0	0	0	0	0	0	0	0
Belize	BLZ	Capture	Yellowfin tuna	Yellowfin tuna	Pacific, Southeast	Marine fish	Thunnus albacares (Bonnaterre, 1788)	Yellowfin tuna	4.4	12953	0	0	0	0	0	0	0	0	0	0	0	0	0	0	0	0	0	1100	850	880	1540	1280	3110	2400	1399	394	0	0	0	0	0	0	0	0	0	0	0	0	0
Belize	BLZ	Capture	Yellowfin tuna	Yellowfin tuna	Pacific, Western Central	Marine fish	Thunnus albacares (Bonnaterre, 1788)	Yellowfin tuna	4.4	4197	0	0	0	0	0	0	0	0	0	0	0	0	0	0	0	0	0	0	0	19	80	56	46	66	62	957	720	943	208	298	106	273	129	121	28	13	30	21	21
Belize	BLZ	Capture	Freshwater fishes nei	Freshwater fish	America, North - Inland waters	Freshwater fish	Weighted mean	Freshwater fish	2.84532	196	25	25	25	25	25	40	13	2	2	1	4	3	1	1	1	0	1	1	1	0	0	0	0	0	0	0	0	0	0	0	0	0	0	0	0	0	0	0	0
Belize	BLZ	Aquaculture	Cobia	Cobia	Atlantic, Western Central	Marine fish	Rachycentron canadum (Linnaeus, 1766)	Cobia	4	851.7	0	0	0	0	0	0	0	0	0	0	0	0	0	0	0	0	0	0	0	0	0	0	0	0	0	0	0	0	0	0	0	300	384	85	82.7	0	0	0	0
Belize	BLZ	Aquaculture	Tilapias nei	Tilapia	America, North - Inland waters	Freshwater fish	A38	Tilapia	2.15714	6683	0	0	0	0	0	0	0	0	0	0	0	0	0	0	0	0	0	0	0	14	287	136	0	0	0	0	0	0	386	425	389	400	1865	1613	658	55	63	60	47
Belize	BLZ	Aquaculture	Whiteleg shrimp	Shrimp	Atlantic, Western Central	Crustacean	Crustacean	Crustacean	2.5	108935	0	0	0	0	0	0	0	0	0	0	23	0	0	542	99	157	300	600	656	936	717	1230	1642	3163	3630	4460	4400	10160	11040	10653	7235	2472	2279	4027	6670	5047	5813	7080	7163.56
Benin	BEN	Capture	African bonytongue	African bonytongue	Africa - Inland waters	Freshwater fish	Heterotis niloticus (Cuvier, 1829)	African bonytongue	2.7	20460	0	0	0	0	0	0	0	0	0	0	0	210	428	625	576	526	504	400	349	742	700	650	600	600	500	550	550	550	510	400	600	650	650	680	700	700	677	709	824
Benin	BEN	Capture	African moonfish	African moonfish	Atlantic, Eastern Central	Marine fish	Selene dorsalis (Gill, 1863)	African moonfish	4.1	2192	0	0	0	0	21	17	16	18	20	40	26	28	19	32	28	26	21	22	25	24	27	37	35	57	40	121	144	176	271	216	247	198	238	0	0	0	0	0	2
Benin	BEN	Capture	African sicklefish	African sicklefish	Atlantic, Eastern Central	Marine fish	Drepane africana Osório, 1892	African sicklefish	3.1	730.4	16	21	12	7	7	4	4	5	5	44	22	38	23	23	20	18	14	16	15	15	15	18	14	12	8	6	4	24	24	22	14	11	16	6	8	5	35	59	23
Benin	BEN	Capture	Alexandria pompano	Alexandria pompano	Atlantic, Eastern Central	Marine fish	Alectis alexandrina (Geoffroy Saint-Hilaire, 1817)	Alexandria pompano	3.6	108.3	0	0	0	0	0	0	0	0	0	0	0	0	0	0	0	0	0	0	0	0	0	0	0	0	0	0	0	0	0	0	25	0	37	0	0	0	0	0	2
Benin	BEN	Capture	Carangids nei	Amberjack, jack, trevally, scad, pompano	Atlantic, Eastern Central	Marine fish	C23	Amberjack and jack and trevally and scad and pompano	3.9	26043	12	54	14	7	3	2	2	2	2	186	856	759	1493	559	493	459	369	400	500	600	700	800	900	1027	700	475	428	492	585	468	481	385	486	540	676	463	652	1416	1358
Benin	BEN	Capture	Atlantic bonito	Atlantic bonito	Atlantic, Eastern Central	Marine fish	Sarda sarda (Bloch, 1793)	Atlantic bonito	4.5	191	0	0	0	13	19	32	36	16	25	30	6	3	4	7	0	0	0	0	0	0	0	0	0	0	0	0	0	0	0	0	0	0	0	0	0	0	0	0	0
Benin	BEN	Capture	Atlantic bumper	Atlantic bumper	Atlantic, Eastern Central	Marine fish	Chloroscombrus chrysurus (Linnaeus, 1766)	Atlantic bumper	3.5	9473.2	0	0	0	0	0	0	0	0	0	0	0	0	0	0	0	0	0	0	0	0	0	0	0	0	0	853	1022	1131	984	822	813	400	78	224	343	276	253	546	489
Benin	BEN	Capture	Atlantic chub mackerel	Atlantic chub mackerel	Atlantic, Eastern Central	Marine fish	Scomber colias Gmelin, 1789	Atlantic chub mackerel	3.9	6498	0	0	0	0	0	0	0	0	0	120	369	434	428	519	458	427	344	330	320	300	280	300	250	205	140	314	452	20	0	0	0	0	488	0	0	0	0	0	0
Benin	BEN	Capture	Atlantic emperor	Atlantic emperor	Atlantic, Eastern Central	Marine fish	Lethrinus atlanticus Valenciennes, 1830	Atlantic emperor	3.5	121	0	0	0	0	0	0	0	0	0	0	0	0	0	0	0	0	0	0	0	0	0	0	0	0	0	0	0	0	0	49	38	31	3	0	0	0	0	0	0
Benin	BEN	Capture	[Cypselurus spp]	Atlantic flyingfish	Atlantic, Eastern Central	Marine fish	Cheilopogon melanurus (Valenciennes, 1847)	Atlantic flyingfish	3.6	7071.4	0	0	0	0	0	0	0	0	0	0	0	0	0	0	0	0	0	0	0	0	0	0	0	0	0	0	0	0	0	0	0	0	0	0	0	0	0	0	0
Benin	BEN	Capture	Atlantic sailfish	Atlantic sailfish	Atlantic, Eastern Central	Marine fish	Istiophorus albicans (Latreille, 1804)	Atlantic sailfish	4.5	484	0	0	0	0	0	36	48	0	53	50	25	32	40	8	21	20	21	20	20	20	19	6	4	5	5	12	2	2	5	3	3	4	0	0	0	0	0	0	0
Benin	BEN	Capture	Halfbeaks nei	Ballyhoo halfbeak	Atlantic, Eastern Central	Marine fish	Hemiramphus brasiliensis (Linnaeus, 1758)	Ballyhoo halfbeak	2.3	1141	0	0	0	0	0	0	0	0	0	0	0	0	0	0	0	0	0	0	0	0	0	0	0	0	0	0	0	0	0	8	8	7	8	17	30	32	15	165	156
Benin	BEN	Capture	Barracudas nei	Barracuda	Atlantic, Eastern Central	Marine fish	C11	Barracuda	4.46667	14864	0	0	0	0	0	0	0	0	0	94	241	171	187	419	370	345	277	300	338	328	330	400	350	297	200	262	365	409	412	338	326	261	172	271	268	287	373	524	453
Benin	BEN	Capture	Bigeye grunt	Bigeye grunt	Atlantic, Eastern Central	Marine fish	Brachydeuterus auritus (Valenciennes, 1832)	Bigeye grunt	3	761.6	0	0	0	0	0	0	0	0	0	0	0	0	0	0	0	0	0	0	0	0	0	0	0	0	0	0	0	0	0	0	0	0	0	0	0	0	0	0	0
Benin	BEN	Capture	Bigeye tuna	Bigeye tuna	Atlantic, Eastern Central	Marine fish	Thunnus obesus (Lowe, 1839)	Bigeye tuna	4.5	2556	0	0	0	0	0	40	45	0	0	0	15	6	7	8	10	9	7	8	9	9	9	30	13	11	0	0	0	5	0	4	19	15	58	25	9	7	76	36	54
Benin	BEN	Capture	Black seabream	Black seabream	Atlantic, Eastern Central	Marine fish	Spondyliosoma cantharus (Linnaeus, 1758)	Black seabream	3.3	1193	28	35	19	5	3	2	2	2	2	13	8	9	13	15	13	12	9	10	20	20	30	45	48	56	40	93	147	179	223	0	0	0	2	23	4	0	3	5	7
Benin	BEN	Capture	[Hemiramphus spp]	Black-barred halfbeak	Atlantic, Eastern Central	Marine fish	Hemiramphus far (Forsskål, 1775)	Black-barred halfbeak	2.9	120.2	0	0	0	0	0	0	0	0	0	0	0	0	0	0	0	0	0	0	0	0	0	0	0	0	0	0	0	0	0	0	0	0	0	0	0	0	0	0	0
Benin	BEN	Capture	Requiem sharks nei	Blacktip shark	Atlantic, Eastern Central	Marine fish	Carcharhinus limbatus (Müller & Henle, 1839)	Blacktip shark	4.4	2089	0	0	0	0	0	0	0	0	0	0	0	0	0	0	0	0	0	0	0	0	0	0	0	0	0	0	0	0	0	0	0	0	0	0	0	0	0	0	8
Benin	BEN	Capture	Blue marlin	Blue marlin	Atlantic, Eastern Central	Marine fish	Makaira nigricans Lacepède, 1802	Blue marlin	4.5	115	0	0	0	0	0	6	8	0	9	10	7	4	12	0	6	6	6	6	5	5	5	5	5	5	5	0	0	0	0	0	0	0	0	0	0	0	0	0	0
Benin	BEN	Capture	Boe drum	Boe drum	Atlantic, Eastern Central	Marine fish	Pteroscion peli (Bleeker, 1863)	Boe drum	3.6	1258	0	0	0	0	0	0	0	0	0	0	0	0	0	0	0	0	0	0	0	0	0	0	0	61	40	115	137	169	244	200	192	100	0	0	0	0	0	0	0
Benin	BEN	Capture	Bonga shad	Bonga shad	Africa - Inland waters	Freshwater fish	Ethmalosa fimbriata (Bowdich, 1825)	Bonga shad	2.5	43921.2	0	0	0	0	0	0	0	0	0	0	0	4059	2217	2465	2272	2076	1990	2100	2095	1963	1900	1850	1800	1798	1500	1700	1700	1700	1600	1250	1100	900	900	500	341	257	322	539	654
Benin	BEN	Capture	Bonga shad	Bonga shad	Atlantic, Eastern Central	Marine fish	Ethmalosa fimbriata (Bowdich, 1825)	Bonga shad	2.5	108	0	0	0	0	0	0	0	0	0	0	0	0	0	0	0	0	0	0	0	0	0	0	0	8	5	8	17	14	22	12	12	10	0	0	0	0	0	0	0
Benin	BEN	Capture	Frigate and bullet tunas	Bullet tuna	Atlantic, Eastern Central	Marine fish	Auxis rochei (Risso, 1810)	Bullet tuna	4.4	342	0	0	0	25	37	64	72	32	49	50	1	3	6	3	0	0	0	0	0	0	0	0	0	0	0	0	0	0	0	0	0	0	0	0	0	0	0	0	0
Benin	BEN	Capture	Cyprinids nei	Carp	Africa - Inland waters	Freshwater fish	C351	Carp	2.38	1748	0	0	0	0	0	0	0	0	0	0	0	0	0	0	0	0	0	0	0	0	0	0	0	0	0	0	0	0	0	0	0	0	0	0	0	0	0	0	0
Benin	BEN	Capture	Cobia	Cobia	Atlantic, Eastern Central	Marine fish	Rachycentron canadum (Linnaeus, 1766)	Cobia	4	257.9	0	0	0	0	0	0	0	0	0	0	0	0	0	0	0	0	0	0	0	0	0	0	0	0	0	0	0	0	0	0	0	0	25	0	0	0	0	0	0
Benin	BEN	Capture	Common dolphinfish	Common dolphinfish	Atlantic, Eastern Central	Marine fish	Coryphaena hippurus Linnaeus, 1758	Common dolphinfish	4.4	1147	0	0	0	0	0	0	0	0	0	0	0	0	0	0	0	0	0	0	0	0	0	0	0	4	3	48	28	24	31	25	26	21	11	12	5	4	7	63	21
Benin	BEN	Capture	Common guitarfish	Common guitarfish	Atlantic, Eastern Central	Marine fish	Rhinobatos rhinobatos (Linnaeus, 1758)	Common guitarfish	4.1	188.5	0	0	0	0	0	0	0	0	0	0	0	0	0	0	0	0	0	0	0	0	0	0	0	0	0	0	0	0	0	0	0	0	0	0	0	0	0	0	0
Benin	BEN	Capture	Guitarfishes, etc. nei	Common guitarfish	Atlantic, Eastern Central	Marine fish	Rhinobatos rhinobatos (Linnaeus, 1758)	Common guitarfish	4.1	1203	0	0	0	0	0	0	0	0	0	0	0	0	0	0	0	0	0	0	0	0	0	0	0	0	0	0	0	32	42	39	35	28	6	6	93	66	0	92	84
Benin	BEN	Capture	Pandoras nei	Common pandora	Atlantic, Eastern Central	Marine fish	Pagellus erythrinus (Linnaeus, 1758)	Common pandora	3.5	1644	0	0	0	0	0	0	0	0	0	31	17	13	6	17	15	14	11	12	14	14	16	22	20	15	10	0	1	7	31	149	16	13	42	355	60	37	48	136	205
Benin	BEN	Capture	Marine crabs nei	Crab	Atlantic, Eastern Central	Crustacean	Crustacean	Crustacean	2.5	921	0	0	0	0	0	0	0	0	0	0	0	0	47	50	44	41	33	36	40	40	40	50	45	32	20	9	22	47	29	23	24	19	28	8	10	4	1	55	62
Benin	BEN	Capture	West African croakers nei	Croaker	Atlantic, Eastern Central	Marine fish	C318	Croaker	3.78571	39408.7	355	237	177	69	71	68	154	228	300	415	700	685	734	1756	1570	1463	1176	1150	1100	1050	1000	950	900	875	600	697	978	1292	1316	1166	1058	847	663	566	656	738	834	1258	1267
Benin	BEN	Capture	Freshwater crustaceans nei	Crustacean	Africa - Inland waters	Crustacean	Crustacean	Crustacean	2.5	104756	0	0	0	0	0	0	0	0	0	0	0	4081	2709	3984	3673	3357	3218	3800	3794	4503	4600	4700	4800	4924	4100	4600	4600	4600	4300	3350	3100	2800	2800	2250	2000	2020	1314	89	116
Benin	BEN	Capture	Dentex nei	Dentex	Atlantic, Eastern Central	Marine fish	C48	Dentex	4	2721.5	5	25	18	4	1	2	2	2	2	53	44	86	60	105	93	87	70	76	86	83	95	100	90	83	60	20	19	60	63	60	68	54	237	0	0	22	87	145	98
Benin	BEN	Capture	Spadefishes nei	East Atlantic African spadefish	Atlantic, Eastern Central	Marine fish	Ephippus goreensis Cuvier, 1831	East Atlantic African spadefish	3.5	155	0	0	0	0	0	0	0	0	0	9	3	5	1	0	0	0	1	1	1	2	3	5	4	4	3	2	1	4	7	17	9	7	3	9	3	2	11	18	9
Benin	BEN	Capture	Elephantsnout fishes nei	Elephant-snout fish	Africa - Inland waters	Freshwater fish	Mormyrus kannume Forsskål, 1775	Elephant-snout fish	3.2	397	0	0	0	0	0	0	0	0	0	0	0	0	0	0	0	0	0	0	0	0	0	0	0	0	0	0	0	0	0	0	0	0	0	0	0	0	0	0	0
Benin	BEN	Capture	European anchovy	European anchovy	Atlantic, Eastern Central	Marine fish	Engraulis encrasicolus (Linnaeus, 1758)	European anchovy	3.1	14945	0	0	0	0	0	0	0	0	0	1116	397	663	137	139	123	115	92	100	125	200	250	350	400	478	330	852	1381	1472	1099	874	904	450	0	0	0	0	392	820	542
Benin	BEN	Capture	Flatfishes nei	Flatfish	Atlantic, Eastern Central	Marine fish	C61	Flatfish	3.7	1637	85	100	101	123	83	47	45	52	60	22	17	18	12	19	17	16	13	14	16	23	30	37	45	52	30	14	22	42	53	33	35	28	43	47	4	0	35	36	38
Benin	BEN	Capture	Mullets nei	Flathead grey mullet	Africa - Inland waters	Freshwater fish	Mugil cephalus Linnaeus, 1758	Flathead grey mullet	2.5	50781	0	0	0	0	0	0	0	0	0	0	0	1012	263	369	340	311	298	600	763	637	1000	1500	2000	2198	1800	2050	2050	2050	2050	1600	2450	2560	2560	2700	2770	3000	2973	1354	1456
Benin	BEN	Capture	Flyingfishes nei	Flyingfish	Atlantic, Eastern Central	Marine fish	C73	Flyingfish	3.36667	17320	0	0	0	0	0	0	0	0	0	75	74	200	116	42	37	34	28	30	33	32	28	25	20	15	10	96	92	122	125	99	102	82	1164	1362	877	425	434	1658	654
Benin	BEN	Capture	Freshwater fishes nei	Freshwater fish	Africa - Inland waters	Freshwater fish	Weighted mean	Freshwater fish	2.56955	355697	20550	20550	20200	20200	20200	20200	20000	17000	17400	16000	16000	4121	5638	7939	7319	6689	6413	7595	7464	9552	6563	5096	3838	3733	3000	3440	3433	3440	3220	2400	3750	4000	4000	4200	4300	4200	4423	3862	5623
Benin	BEN	Capture	Freshwater gobies nei	Freshwater goby	Africa - Inland waters	Freshwater fish	Awaous aeneofuscus (Peters, 1852)	Freshwater goby	2.1	24593	0	0	0	0	0	0	0	0	0	0	0	180	374	599	552	504	483	1100	1302	914	900	850	800	800	700	800	800	800	750	600	900	950	950	1000	1050	1100	1064	845	924
Benin	BEN	Capture	Giant African threadfin	Giant African threadfin	Atlantic, Eastern Central	Marine fish	Polydactylus quadrifilis (Cuvier, 1829)	Giant African threadfin	4	296.4	0	0	0	0	0	0	0	0	0	0	0	0	0	0	0	0	0	0	0	0	0	0	0	0	0	0	0	21	21	26	12	10	2	19	24	19	3	5	4
Benin	BEN	Capture	Glass schilbid	Glass schilbid	Africa - Inland waters	Freshwater fish	Parailia pellucida (Boulenger, 1901)	Glass schilbid	3.5	1968	0	0	0	0	0	0	0	0	0	0	0	0	0	0	0	0	0	0	0	0	0	0	0	0	0	0	0	0	0	0	0	0	0	0	0	0	0	0	0
Benin	BEN	Capture	Great barracuda	Great barracuda	Atlantic, Eastern Central	Marine fish	Sphyraena barracuda (Edwards, 1771)	Great barracuda	4.5	124.9	0	0	0	0	0	0	0	0	0	0	0	0	0	0	0	0	0	0	0	0	0	0	0	0	0	0	0	0	0	0	0	0	0	0	0	0	0	0	0
Benin	BEN	Capture	Groupers nei	Grouper	Atlantic, Eastern Central	Marine fish	C95	Grouper	4.1	5434.7	0	0	0	0	0	0	0	0	0	17	30	33	23	30	26	24	19	21	23	22	25	25	23	20	14	16	1	58	67	9	38	30	500	688	538	567	600	204	598
Benin	BEN	Capture	Grunts, sweetlips nei	Grunt, sweetlips	Atlantic, Eastern Central	Marine fish	C96	Grunt and sweetlips	3.48	8634	480	234	173	70	24	25	24	28	30	211	252	341	168	255	225	210	169	183	206	200	228	311	296	269	180	222	365	374	268	455	473	200	22	0	0	15	24	36	23
Benin	BEN	Capture	Guachanche barracuda	Guachanche barracuda	Atlantic, Eastern Central	Marine fish	Sphyraena guachancho Cuvier, 1829	Guachanche barracuda	4.4	6004.2	0	0	0	0	0	0	0	0	0	0	0	0	0	0	0	0	0	0	0	0	0	0	0	0	0	0	0	0	0	0	0	0	0	0	0	0	0	0	0
Benin	BEN	Capture	Hammerhead sharks, etc. nei	Hammerhead shark	Atlantic, Eastern Central	Marine fish	C120	Hammerhead shark	4.5	4476	0	0	0	0	0	0	0	0	0	0	0	0	0	0	0	0	0	0	0	0	0	0	0	9	0	0	0	15	15	12	12	10	0	268	153	51	268	131	118
Benin	BEN	Capture	Diadromous clupeoids nei	Herring, shad, sardine, menhaden	Africa - Inland waters	Freshwater fish	C49	Herring and shad and sardine and menhaden	3	10853	0	0	0	0	0	0	0	0	0	0	0	589	289	227	209	191	183	160	137	260	250	230	210	210	200	230	230	230	220	160	240	250	250	260	270	290	135	227	223
Benin	BEN	Capture	Jacks, crevalles nei	Jack	Atlantic, Eastern Central	Marine fish	C126	Jack	4.13333	3324.4	0	0	0	0	0	0	0	0	0	0	0	0	0	0	0	0	0	0	0	0	0	0	0	0	0	0	0	0	0	0	0	0	0	0	0	0	0	0	0
Benin	BEN	Capture	Largehead hairtail	Largehead hairtail	Atlantic, Eastern Central	Marine fish	Trichiurus lepturus Linnaeus, 1758	Largehead hairtail	4.4	7093	0	0	0	0	0	0	0	0	0	11	16	5	13	30	50	80	100	150	200	250	300	350	400	543	370	584	579	662	548	436	451	200	20	55	71	75	84	51	65
Benin	BEN	Capture	Lesser African threadfin	Lesser African threadfin	Atlantic, Eastern Central	Marine fish	Galeoides decadactylus (Bloch, 1795)	Lesser African threadfin	3.6	16005.3	0	0	0	0	0	0	0	0	0	0	0	0	0	0	0	0	0	0	0	0	0	0	0	0	0	0	0	528	568	455	472	378	377	406	542	608	857	650	584
Benin	BEN	Capture	Little tunny(=Atl.black skipj)	Little tunny	Atlantic, Eastern Central	Marine fish	Euthynnus alletteratus (Rafinesque, 1810)	Little tunny	4.5	25201.7	0	0	0	16	24	40	45	20	31	30	90	14	7	43	66	61	49	53	60	58	58	196	83	69	69	69	69	259	331	260	270	216	183	0	0	0	1033	2625	2598
Benin	BEN	Capture	Tropical spiny lobsters nei	Lobster	Atlantic, Eastern Central	Crustacean	Crustacean	Crustacean	2.5	172	0	0	0	0	0	0	0	0	0	0	0	0	6	6	5	5	5	4	4	3	3	5	4	3	2	2	7	7	10	6	9	7	8	2	7	6	22	4	6
Benin	BEN	Capture	Marine fishes nei	Marine fish	Atlantic, Eastern Central	Marine fish	Weighted mean	Marine fish	3.82976	57048	3740	3430	3393	3426	3077	2847	2650	3000	2980	129	1444	1005	504	249	195	130	27	455	1110	889	1785	3628	3294	1677	1150	370	1192	0	548	256	2635	235	406	563	1105	876	961	664	563
Benin	BEN	Capture	Needlefishes, etc. nei	Needlefish	Atlantic, Eastern Central	Marine fish	C174	Needlefish	4.46667	4813	0	0	0	0	0	0	0	0	0	0	0	0	0	90	79	74	59	55	50	45	40	35	30	27	20	38	32	25	27	21	22	18	48	60	55	25	0	162	158
Benin	BEN	Capture	Black catfishes nei	North African catfish	Africa - Inland waters	Freshwater fish	Clarias gariepinus (Burchell, 1822)	North African catfish	3.8	71596	1800	1800	1800	1800	2000	2000	2000	2000	2000	2000	2000	2710	1528	1222	1126	1029	987	1100	1143	1289	1300	1400	1500	1542	1300	1500	1500	1500	1400	1100	1650	1750	1750	1850	1900	2200	2526	2784	3210
Benin	BEN	Capture	Torpedo-shaped catfishes nei	North African catfish	Africa - Inland waters	Freshwater fish	Clarias gariepinus (Burchell, 1822)	North African catfish	3.8	95780	1800	1800	1800	1800	2000	2000	2000	2000	2000	2000	2000	2228	3957	2107	1942	1775	1701	1600	1399	2325	2100	1900	1700	1537	1300	1500	1500	1500	1400	1100	1650	1750	1750	1850	1900	2000	2542	2166	2256
Benin	BEN	Capture	Pigeye shark	Pigeye shark	Atlantic, Eastern Central	Marine fish	Carcharhinus amboinensis (Müller & Henle, 1839)	Pigeye shark	4.3	319.9	0	0	0	0	0	0	0	0	0	0	0	0	0	0	0	0	0	0	0	0	0	0	0	0	0	0	0	0	0	0	0	0	0	0	0	0	0	0	0
Benin	BEN	Capture	Pompano dolphinfish	Pompano dolphinfish	Atlantic, Eastern Central	Marine fish	Coryphaena equiselis Linnaeus, 1758	Pompano dolphinfish	4.5	275.6	0	0	0	0	0	0	0	0	0	0	0	0	0	0	0	0	0	0	0	0	0	0	0	0	0	0	0	0	0	0	0	0	0	0	0	0	0	0	0
Benin	BEN	Capture	River prawns nei	Prawn	Africa - Inland waters	Crustacean	Crustacean	Crustacean	2.5	3247	0	0	0	0	0	0	0	0	0	0	0	37	67	140	129	118	113	120	139	188	150	130	120	120	100	110	110	110	100	80	120	130	130	130	133	133	53	60	83
Benin	BEN	Capture	Rays, stingrays, mantas nei	Ray, stingray, manta	Atlantic, Eastern Central	Marine fish	C205	Ray and stingray and manta	3.73333	2613	56	52	38	6	11	7	7	8	10	92	70	127	79	69	61	57	46	50	56	54	62	70	60	47	30	38	32	349	150	155	47	38	33	19	0	13	61	0	0
Benin	BEN	Capture	Pargo breams nei	Red porgy	Atlantic, Eastern Central	Marine fish	Pagrus pagrus (Linnaeus, 1758)	Red porgy	3.9	363	0	0	0	0	0	0	0	0	0	0	0	0	0	0	0	0	0	0	0	0	0	0	0	0	0	0	0	0	0	17	0	0	0	0	0	5	138	89	32
Benin	BEN	Capture	Royal threadfin	Royal threadfin	Atlantic, Eastern Central	Marine fish	Pentanemus quinquarius (Linnaeus, 1758)	Royal threadfin	3.6	1522.4	0	0	0	0	0	0	0	0	0	0	0	0	0	0	0	0	0	0	0	0	0	0	0	0	0	0	0	99	114	90	93	75	10	33	151	123	143	159	146
Benin	BEN	Capture	Sardinellas nei	Sardine	Atlantic, Eastern Central	Marine fish	C209	Sardine	3.16667	39982.6	0	0	0	0	0	0	0	0	0	468	1513	2677	963	1822	1634	1522	1223	1250	1200	1150	1100	1200	1100	1072	750	1434	1496	1806	1559	1240	1283	500	449	837	1263	791	1538	593	785
Benin	BEN	Capture	Sharks, rays, skates, etc. nei	Shark, ray, skate	Atlantic, Eastern Central	Marine fish	C328	Shark and ray and skate	4.20556	5152	4	3	6	2	4	2	2	2	2	198	330	405	297	274	242	225	181	160	140	120	100	94	76	28	40	87	86	97	88	73	71	57	168	0	0	0	397	102	98
Benin	BEN	Capture	Natantian decapods nei	Shrimp	Atlantic, Eastern Central	Crustacean	Crustacean	Crustacean	2.5	491	4	0	0	0	0	0	0	0	0	0	0	0	0	0	0	0	0	0	0	0	0	0	0	31	20	3	55	88	63	43	71	50	57	0	0	0	0	0	0
Benin	BEN	Capture	Penaeus shrimps nei	Shrimp	Africa - Inland waters	Crustacean	Crustacean	Crustacean	2.5	66469	0	0	0	0	0	0	0	0	0	0	0	2238	2144	3729	3438	3142	3011	3800	3739	3117	3000	2850	2700	2574	2100	2400	2400	2400	2250	1750	1600	1450	1450	1150	1000	1200	1073	1121	1135
Benin	BEN	Capture	Skipjack tuna	Skipjack tuna	Atlantic, Eastern Central	Marine fish	Katsuwonus pelamis (Linnaeus, 1758)	Skipjack tuna	4.4	288	0	0	0	8	30	60	68	38	10	20	11	5	3	7	2	2	2	2	2	2	2	7	3	2	2	0	0	0	0	0	0	0	0	0	0	0	0	0	0
Benin	BEN	Capture	Sea catfishes nei	Smoothmouth sea catfish	Atlantic, Eastern Central	Marine fish	Carlarius heudelotii (Valenciennes, 1840)	Smoothmouth sea catfish	3.8	452	23	15	8	2	4	1	1	1	1	24	26	21	34	29	26	24	19	21	23	22	20	17	15	12	8	2	2	3	12	10	10	8	5	1	1	1	0	0	0
Benin	BEN	Capture	Snappers nei	Snapper	Atlantic, Eastern Central	Marine fish	C242	Snapper	4	2621.7	0	0	0	0	0	0	0	0	0	63	92	64	90	76	67	62	50	54	60	58	66	90	86	92	60	32	51	64	68	66	58	46	486	8	6	7	10	16	25
Benin	BEN	Capture	[Pomadasys spp]	Sompat grunt	Atlantic, Eastern Central	Marine fish	Pomadasys jubelini (Cuvier, 1830)	Sompat grunt	3.3	300.7	0	0	0	0	0	0	0	0	0	0	0	0	0	0	0	0	0	0	0	0	0	0	0	0	0	0	0	0	0	0	0	0	0	0	0	0	0	0	0
Benin	BEN	Capture	Spinner shark	Spinner shark	Atlantic, Eastern Central	Marine fish	Carcharhinus brevipinna (Müller & Henle, 1839)	Spinner shark	4.2	396.1	0	0	0	0	0	0	0	0	0	0	0	0	0	0	0	0	0	0	0	0	0	0	0	0	0	0	0	0	0	0	0	0	0	0	0	0	0	0	0
Benin	BEN	Capture	Cuttlefish, bobtail squids nei	Squid	Atlantic, Eastern Central	Cephalopod	Cephalopod	Cephalopod	3	234	0	0	0	0	0	0	0	0	0	0	0	0	0	0	0	0	0	0	0	0	0	0	0	18	12	1	5	33	90	5	33	26	5	0	0	0	0	0	0
Benin	BEN	Capture	Stingrays nei	Stingray	Atlantic, Eastern Central	Marine fish	C270	Stingray	3.75	354.4	0	0	0	0	0	0	0	0	0	0	0	0	0	0	0	0	0	0	0	0	0	0	0	0	0	0	0	0	0	0	0	0	0	0	0	0	0	0	0
Benin	BEN	Capture	Snakeheads(=Murrels) nei	Striped snakehead	Africa - Inland waters	Freshwater fish	Channa striata (Bloch, 1793)	Striped snakehead	3.6	2420	0	0	0	0	0	0	0	0	0	0	0	0	0	0	0	0	0	0	0	0	0	0	0	0	0	0	0	0	0	0	0	0	0	0	0	0	0	0	0
Benin	BEN	Capture	Swordfish	Swordfish	Atlantic, Eastern Central	Marine fish	Xiphias gladius Linnaeus, 1758	Swordfish	4.5	1451	0	0	0	0	0	18	24	0	86	90	39	13	19	26	28	28	26	28	25	24	24	10	0	3	0	41	68	71	95	75	78	62	41	55	18	11	44	74	51
Benin	BEN	Capture	Threadfins, tasselfishes nei	Threadfin	Atlantic, Eastern Central	Marine fish	C284	Threadfin	3.8	11822	146	172	120	44	81	84	81	93	100	441	447	444	714	1218	1075	1002	805	700	650	550	500	500	450	358	250	324	463	0	0	0	0	0	10	0	0	0	0	0	0
Benin	BEN	Capture	Tilapias nei	Tilapia	Africa - Inland waters	Freshwater fish	C289	Tilapia	2.1375	475473	8000	8000	8000	8000	10000	10000	10000	10000	9985	9989	9985	10234	8364	9152	8436	7710	7390	10200	10235	11713	11500	11500	11500	11648	9600	10900	10900	10900	10200	7950	12100	12750	12750	13400	13700	13700	10858	12158	16201
Benin	BEN	Capture	Tonguesole nei	Tonguesole	Atlantic, Eastern Central	Marine fish	C295	Tonguesole	3.5125	116	0	0	0	0	0	0	0	0	0	0	0	0	0	0	0	0	0	0	0	0	0	0	0	0	0	0	0	0	0	0	0	0	0	0	0	0	0	0	0
Benin	BEN	Capture	True tunas nei	Tuna	Atlantic, Eastern Central	Marine fish	C306	Tuna	4.45	293.7	0	0	0	0	0	0	0	0	0	0	0	0	0	0	0	0	0	0	0	0	0	0	0	0	0	0	0	0	0	0	0	0	0	0	0	0	0	0	0
Benin	BEN	Capture	Tuna-like fishes nei	Tuna, bonito	Atlantic, Eastern Central	Marine fish	C309	Tuna and bonito	4.45556	2628	0	0	0	0	0	0	0	0	0	0	0	0	0	0	0	0	0	0	0	0	0	0	0	0	0	0	0	0	0	0	0	0	8	595	328	239	287	421	389
Benin	BEN	Capture	Upsidedown catfishes	Upsidedown catfish	Africa - Inland waters	Freshwater fish	Synodontis batensoda Rüppell, 1832	Upsidedown catfish	2.8	7017	0	0	0	0	0	0	0	0	0	0	0	252	563	300	277	253	243	130	21	125	120	110	110	110	100	110	110	110	100	80	120	130	130	140	143	130	139	133	154
Benin	BEN	Capture	West African ilisha	West African ilisha	Atlantic, Eastern Central	Marine fish	Ilisha africana (Bloch, 1795)	West African ilisha	3.6	33289.5	0	0	0	0	0	0	0	0	0	2107	1439	1584	2386	675	596	555	446	483	544	528	602	822	781	671	450	923	692	795	1058	841	870	696	375	889	1516	1346	1691	1641	1397
Benin	BEN	Capture	West African ladyfish	West African ladyfish	Atlantic, Eastern Central	Marine fish	Elops lacerta Valenciennes, 1847	West African ladyfish	4.2	1757	0	0	0	0	0	0	0	0	0	0	0	0	0	0	0	0	0	0	0	0	0	0	0	0	0	15	16	25	19	0	23	19	15	23	12	13	43	203	165
Benin	BEN	Capture	African lungfishes	West African lungfish	Africa - Inland waters	Freshwater fish	Protopterus annectens (Owen, 1839)	West African lungfish	3.8	3586	0	0	0	0	0	0	0	0	0	0	0	22	57	40	37	34	32	100	127	121	110	105	100	100	100	110	110	110	100	80	120	130	130	140	143	175	107	113	132
Benin	BEN	Capture	West African Spanish mackerel	West African Spanish mackerel	Atlantic, Eastern Central	Marine fish	Scomberomorus tritor (Cuvier, 1832)	West African Spanish mackerel	4.4	26365.2	0	0	0	23	35	60	68	30	46	50	104	17	13	334	211	213	202	214	194	188	188	362	511	205	205	203	185	506	462	370	378	302	183	686	605	584	697	1394	1252
Benin	BEN	Capture	Yellowfin tuna	Yellowfin tuna	Atlantic, Eastern Central	Marine fish	Thunnus albacares (Bonnaterre, 1788)	Yellowfin tuna	4.4	580	0	0	0	48	95	100	113	49	65	60	19	3	2	7	1	1	1	1	1	1	1	3	1	1	1	1	0	0	5	0	0	0	0	0	0	0	0	0	0
Benin	BEN	Aquaculture	Blackchin tilapia	Blackchin tilapia	Africa - Inland waters	Freshwater fish	Sarotherodon melanotheron Rüppell, 1852	Blackchin tilapia	2.5	240	0	0	0	0	0	0	0	0	0	0	0	0	0	0	0	0	0	0	0	0	0	0	0	0	0	0	0	0	0	120	120	0	0	0	0	0	0	0	0
Benin	BEN	Aquaculture	Nile tilapia	Nile tilapia	Africa - Inland waters	Freshwater fish	Oreochromis niloticus (Linnaeus, 1758)	Nile tilapia	2	14653.8	0	0	0	0	0	0	0	0	0	0	0	0	0	0	0	0	0	0	0	0	0	0	0	0	0	0	0	0	0	200	235	158	128	185	220	250	305	407	1165
Benin	BEN	Aquaculture	North African catfish	North African catfish	Africa - Inland waters	Freshwater fish	Clarias gariepinus (Burchell, 1822)	North African catfish	3.8	13962.2	0	0	0	0	0	0	0	0	0	0	0	0	0	0	0	0	0	0	0	0	0	0	0	0	0	0	0	0	0	30	60	20	85	123	144	150	195	260	260
Bolivia	BOL	Capture	Silversides(=Sand smelts) nei	Argentinian silverside	America, South - Inland waters	Freshwater fish	Odontesthes bonariensis (Valenciennes, 1835)	Argentinian silverside	2.6	29718	0	0	0	0	200	200	200	200	200	400	1095	1146	1282	2070	3686	1908	1624	635	785	850	850	850	850	850	850	760	800	860	888	850	880	919	963	1000	750	167	150	0	0
Bolivia	BOL	Capture	Common carp	Common carp	America, South - Inland waters	Freshwater fish	Cyprinus carpio Linnaeus, 1758	Common carp	3.1	606	0	0	0	0	0	0	0	0	0	0	0	0	0	606	0	0	0	0	0	0	0	0	0	0	0	0	0	0	0	0	0	0	0	0	0	0	0	0	0
Bolivia	BOL	Capture	Freshwater fishes nei	Freshwater fish	America, South - Inland waters	Freshwater fish	Weighted mean	Freshwater fish	2.7829	210771	1200	1500	1500	3600	4129	5367	3835	3845	3855	3720	2744	3075	3050	3000	2987	3003	3036	4742	4452	4726	4800	4850	4865	4860	4911	4900	5303	5615	5548	5510	5200	4851	5787	6568	6196	6510	6670	7171	6990
Bolivia	BOL	Capture	Rainbow trout	Rainbow trout	America, South - Inland waters	Freshwater fish	Oncorhynchus mykiss (Walbaum, 1792)	Rainbow trout	4.1	3981	50	50	50	50	50	50	70	60	50	50	32	5	0	0	236	256	245	141	116	116	338	338	340	342	345	280	197	124	0	0	0	0	0	0	0	0	0	0	0
Bolivia	BOL	Aquaculture	Argentinian silverside	Argentinian silverside	America, South - Inland waters	Freshwater fish	Odontesthes bonariensis (Valenciennes, 1835)	Argentinian silverside	2.6	318	0	0	0	0	0	0	0	0	0	0	0	0	0	8	290	20	0	0	0	0	0	0	0	0	0	0	0	0	0	0	0	0	0	0	0	0	0	0	0
Bolivia	BOL	Aquaculture	Cachama	Cachama	America, South - Inland waters	Freshwater fish	Colossoma macropomum (Cuvier, 1816)	Cachama	2	6601.8	0	0	0	0	0	0	0	0	0	0	0	0	0	0	0	0	0	0	0	0	0	0	0	0	0	0	4	6	20	20	100	309	311	238	262	288	320	338	400
Bolivia	BOL	Aquaculture	Common carp	Common carp	America, South - Inland waters	Freshwater fish	Cyprinus carpio Linnaeus, 1758	Common carp	3.1	2035.6	0	0	0	0	0	0	0	0	0	0	0	10	10	20	30	21	29	45	30	26	25	35	35	40	40	40	45	48	40	40	50	71	71	80	87	96	101	78	105
Bolivia	BOL	Aquaculture	Nile tilapia	Nile tilapia	America, South - Inland waters	Freshwater fish	Oreochromis niloticus (Linnaeus, 1758)	Nile tilapia	2	1210	0	0	0	0	0	0	0	0	0	0	0	0	0	0	0	0	51	79	68	70	55	40	30	30	30	30	35	39	70	60	50	25	25	30	35	39	42	22	45
Bolivia	BOL	Aquaculture	Pirapatinga	Pirapatinga	America, South - Inland waters	Freshwater fish	Piaractus brachypomus (Cuvier, 1818)	Pirapatinga	2.5	5147.1	0	0	0	0	0	0	0	0	0	0	0	0	0	0	0	0	0	0	0	0	0	0	0	0	0	0	6	8	10	10	25	50	30	102	112	129	142	338	350
Bolivia	BOL	Aquaculture	Rainbow trout	Rainbow trout	America, South - Inland waters	Freshwater fish	Oncorhynchus mykiss (Walbaum, 1792)	Rainbow trout	4.1	16502	0	0	0	0	0	0	0	0	0	0	0	35	85	320	144	159	186	525	519	520	300	312	320	328	335	250	328	274	310	300	230	130	194	325	360	414	455	300	500
Botswana	BWA	Capture	Freshwater fishes nei	Freshwater fish	Africa - Inland waters	Freshwater fish	Weighted mean	Freshwater fish	2.7829	12715	600	500	600	600	600	700	650	550	650	700	900	1000	1000	800	700	500	400	300	200	100	33	80	103	64	74	30	38	50	59	49	4	3	2	2	1	17	21	10	6
Botswana	BWA	Capture	Torpedo-shaped catfishes nei	North African catfish	Africa - Inland waters	Freshwater fish	Clarias gariepinus (Burchell, 1822)	North African catfish	3.8	381	0	0	0	0	0	0	0	0	0	0	0	0	0	0	0	0	0	0	0	0	0	0	0	0	0	0	0	0	0	0	25	37	23	19	16	51	74	33	81
Botswana	BWA	Capture	Tilapias nei	Tilapia	Africa - Inland waters	Freshwater fish	C289	Tilapia	2.1375	16047	1000	1000	400	400	650	750	750	700	850	800	800	900	900	800	600	500	400	300	200	100	48	80	88	93	92	88	101	72	102	83	52	82	61	52	43	166	283	388	1081
Botswana	BWA	Aquaculture	Three spotted tilapia	Three spotted tilapia	Africa - Inland waters	Freshwater fish	Oreochromis andersonii (Castelnau, 1861)	Three spotted tilapia	2.1	115	0	0	0	0	0	0	0	0	0	0	0	0	0	0	0	0	0	0	0	0	0	0	0	0	0	0	0	0	0	0	0	0	0	0	0	0	0	0	0
Brazil	BRA	Capture	[Brachyplatystoma rousseauxii]	/	America, South - Inland waters	Freshwater fish	Brachyplatystoma rousseauxii (Castelnau, 1855)	/	4.5	119612	0	0	0	0	0	0	0	0	0	0	0	0	0	0	0	0	0	0	0	0	0	0	0	0	0	0	0	0	0	0	0	0	0	0	0	13560	13665	13781	13606
Brazil	BRA	Capture	[Brycon orbignyanus]	/	America, South - Inland waters	Freshwater fish	Brycon orbignyanus (Valenciennes, 1850)	/	2.7	151	0	0	0	0	0	0	0	0	0	0	0	0	0	0	0	0	0	0	0	0	0	0	0	0	0	0	9	10	9	9	9	8	9	8	8	8	8	8	8
Brazil	BRA	Capture	[Curimata cyprinoides]	/	America, South - Inland waters	Freshwater fish	Curimata cyprinoides (Linnaeus, 1766)	/	2.4	89410	0	0	0	0	0	0	0	0	0	0	0	0	0	0	0	0	0	0	0	0	0	0	0	0	0	0	4972	4810	5068	5358	5101	4977	5468	5012	5209	4912	4951	4993	4929
Brazil	BRA	Capture	[Hoplias aimara]	/	America, South - Inland waters	Freshwater fish	Hoplias aimara (Valenciennes, 1847)	/	3.7	165214	0	0	0	0	0	0	0	0	0	0	0	0	0	0	0	0	0	0	0	0	0	0	0	0	0	0	7404	8189	9232	10038	9865	9205	10309	9450	9821	9261	9334	9413	9293
Brazil	BRA	Capture	[Leporellus vittatus]	/	America, South - Inland waters	Freshwater fish	Leporellus vittatus (Valenciennes, 1850)	/	3.2	15351	0	0	0	0	0	0	0	0	0	0	0	0	0	0	0	0	0	0	0	0	0	0	0	0	0	0	0	0	0	0	0	0	1418	1300	1351	1274	1284	1295	1279
Brazil	BRA	Capture	[Lophiosilurus alexandri]	/	America, South - Inland waters	Freshwater fish	Lophiosilurus alexandri Steindachner, 1876	/	4	6461	0	0	0	0	0	0	0	0	0	0	0	0	0	0	0	0	0	0	0	0	0	0	0	0	0	0	0	0	0	0	0	0	599	549	571	538	542	547	540
Brazil	BRA	Capture	[Loricaria cataphracta]	/	America, South - Inland waters	Freshwater fish	Loricaria cataphracta Linnaeus, 1758	/	3.3	6660	0	0	0	0	0	0	0	0	0	0	0	0	0	0	0	0	0	0	0	0	0	0	0	0	0	0	0	0	0	0	0	0	618	567	589	555	560	564	557
Brazil	BRA	Capture	[Pimelodus maculatus]	/	America, South - Inland waters	Freshwater fish	Pimelodus maculatus Lacepède, 1803	/	2.9	342	0	0	0	0	0	0	0	0	0	0	0	0	0	0	0	0	0	0	0	0	0	0	0	0	0	0	0	0	0	0	0	0	32	29	30	29	29	29	29
Brazil	BRA	Capture	[Schizodon fasciatus]	/	America, South - Inland waters	Freshwater fish	Schizodon fasciatus Spix & Agassiz, 1829	/	2.5	59021	0	0	0	0	0	0	0	0	0	0	0	0	0	0	0	0	0	0	0	0	0	0	0	0	0	0	0	0	0	0	0	0	5430	4977	5173	4914	4952	4994	4931
Brazil	BRA	Capture	[Triportheus angulatus]	/	America, South - Inland waters	Freshwater fish	Triportheus angulatus (Spix & Agassiz, 1829)	/	2.7	57707	0	0	0	0	0	0	0	0	0	0	0	0	0	0	0	0	0	0	0	0	0	0	0	0	0	0	3454	3081	3024	2940	3402	3634	3533	3239	3366	3174	3199	3226	3185
Brazil	BRA	Capture	Acoupa weakfish	Acoupa weakfish	Atlantic, Southwest	Marine fish	Cynoscion acoupa (Lacepède, 1801)	Acoupa weakfish	4.1	381975	0	0	0	0	0	0	0	0	0	0	0	0	0	0	0	0	0	0	0	0	0	0	0	0	0	0	27559	26248	21258	20778	20052	20411	20039	22102	20879	19430	21144	18248	22027
Brazil	BRA	Capture	Aimara	Aimara	America, South - Inland waters	Freshwater fish	Hoplerythrinus unitaeniatus (Spix & Agassiz, 1829)	Aimara	3.4	3538	0	0	0	0	0	0	0	0	0	0	0	0	0	0	0	0	0	0	0	0	0	0	0	0	0	0	0	0	0	0	0	0	330	302	314	296	298	301	297
Brazil	BRA	Capture	Albacore	Albacore	Atlantic, Southwest	Marine fish	Thunnus alalunga (Bonnaterre, 1788)	Albacore	4.3	51593	296	688	494	515	476	276	800	737	732	386	524	399	421	435	514	1113	2710	3613	1227	923	819	652	3418	1872	4414	6863	3226	2649	521	556	360	534	488	202	271	1269	2077	2016	462
Brazil	BRA	Capture	Amazon sailfin catfish	Amazon sailfin catfish	America, South - Inland waters	Freshwater fish	Pterygoplichthys pardalis (Castelnau, 1855)	Amazon sailfin catfish	2	12757	0	0	0	0	0	0	0	0	0	0	0	0	0	0	0	0	0	0	0	0	0	0	0	0	0	0	0	0	0	0	0	0	0	0	0	1442	1453	1465	1447
Brazil	BRA	Capture	Amberjacks nei	Amberjack	Atlantic, Southwest	Marine fish	C6	Amberjack	4.35	12145	0	0	0	0	0	0	0	0	0	0	0	0	0	0	0	0	0	0	0	856	825	1048	119	104	128	588	631	792	833	627	940	904	806	889	839	131	143	123	149
Brazil	BRA	Capture	Carangids nei	Amberjack, jack, trevally, scad, pompano	Atlantic, Southwest	Marine fish	C22	Amberjack and jack and trevally and scad and pompano	4.06667	100502	0	0	0	0	0	0	0	0	0	0	8854	8542	7465	7652	7600	7769	7630	7610	7630	0	0	0	413	560	1050	1022	638	782	806	683	956	1203	1781	1964	1856	1727	1879	1622	1958
Brazil	BRA	Capture	American harvestfish	American harvestfish	Atlantic, Southwest	Marine fish	Peprilus paru (Linnaeus, 1758)	American harvestfish	4.5	1265	277	349	360	279	0	0	0	0	0	0	0	0	0	0	0	0	0	0	0	0	0	0	0	0	0	0	0	0	0	0	0	0	0	0	0	0	0	0	0
Brazil	BRA	Capture	Anchovies, etc. nei	Anchovy	Atlantic, Southwest	Marine fish	C9	Anchovy	3.2625	255993	10476	14072	17171	14706	17081	20552	6111	2018	3343	5903	4887	3890	3400	3485	3400	3476	3420	3400	3410	3806	7672	7102	2654	2682	4039	4197	3766	4398	4676	3353	5181	4374	4445	4902	4627	4306	4686	4044	4882
Brazil	BRA	Capture	Arapaima	Arapaima	America, South - Inland waters	Freshwater fish	Arapaima gigas (Schinz, 1822)	Arapaima	4.5	19199	0	0	0	0	0	0	0	0	0	0	0	0	0	0	0	0	0	0	0	0	0	0	0	0	0	0	427	411	413	1228	1237	1249	1315	1206	1253	1182	1191	1201	1186
Brazil	BRA	Capture	Arawana	Arawana	America, South - Inland waters	Freshwater fish	Osteoglossum bicirrhosum (Cuvier, 1829)	Arawana	3.4	29788	0	0	0	0	0	0	0	0	0	0	0	0	0	0	0	0	0	0	0	0	0	0	0	0	0	0	1791	1621	1644	1622	1679	1817	1813	1662	1727	1629	1642	1656	1635
Brazil	BRA	Capture	Argentine angelshark	Argentine angelshark	Atlantic, Southwest	Marine fish	Squatina argentina (Marini, 1930)	Argentine angelshark	4.1	1700	0	0	0	0	0	0	0	0	0	0	0	0	0	0	0	0	0	0	0	113	1587	0	0	0	0	0	0	0	0	0	0	0	0	0	0	0	0	0	0
Brazil	BRA	Capture	Argentine conger	Argentine conger	Atlantic, Southwest	Marine fish	Conger orbignianus Valenciennes, 1837	Argentine conger	3.7	11716	784	310	610	611	67	57	162	299	223	281	1029	627	548	562	560	572	560	560	560	182	67	110	108	162	108	144	173	43	100	117	83	12	117	128	35	113	123	106	128
Brazil	BRA	Capture	Argentine croaker	Argentine croaker	Atlantic, Southwest	Marine fish	Umbrina canosai Berg, 1895	Argentine croaker	3.9	411879	0	0	0	0	0	0	0	0	0	19045	16537	20187	17643	18086	18000	16000	14000	11000	9000	9268	4983	3358	2216	4849	7729	13567	14596	11301	12899	4699	12901	11164	11570	12761	12052	11216	12204	10533	12715
Brazil	BRA	Capture	Goatfishes, red mullets nei	Argentine goatfish	Atlantic, Southwest	Marine fish	C85	Argentine goatfish	3.675	41507	366	598	610	48	129	305	421	415	505	233	512	293	256	263	260	266	260	260	260	964	530	749	840	1117	1756	2044	2218	1981	2102	1442	1394	1388	1382	1524	1440	1340	1458	1259	1519
Brazil	BRA	Capture	Argentine hake	Argentine hake	Atlantic, Southwest	Marine fish	Merluccius hubbsi Marini, 1933	Argentine hake	4.2	253907	39090	31888	28657	20785	3749	3937	6727	7995	5910	8343	8817	9312	8138	8343	7000	6000	4500	3000	1500	255	0	0	0	128	226	2654	4513	3072	1419	1770	1952	2075	1826	2014	1901	1769	1925	1661	2006
Brazil	BRA	Capture	Argentinian sandperch	Argentinian sandperch	Atlantic, Southwest	Marine fish	Pseudopercis semifasciata (Cuvier, 1829)	Argentinian sandperch	3.9	10864	0	0	0	0	0	0	0	0	0	0	0	0	0	0	0	0	0	0	0	0	0	0	0	0	0	0	460	461	510	704	665	687	610	673	635	591	643	555	670
Brazil	BRA	Capture	Atlantic bonito	Atlantic bonito	Atlantic, Southwest	Marine fish	Sarda sarda (Bloch, 1793)	Atlantic bonito	4.5	4637	0	0	0	0	0	0	0	37	187	179	523	345	214	273	226	71	86	142	142	137	0	0	0	0	0	0	0	0	0	90	353	334	333	367	347	171	0	38	0
Brazil	BRA	Capture	Atlantic bumper	Atlantic bumper	Atlantic, Southwest	Marine fish	Chloroscombrus chrysurus (Linnaeus, 1766)	Atlantic bumper	3.5	68641	0	0	0	0	0	0	0	0	0	0	0	0	0	0	0	0	0	0	0	1868	952	1035	4065	3519	1573	5488	3574	2149	2982	3060	2869	2868	2694	2971	2806	2612	2842	2453	2961
Brazil	BRA	Capture	Atlantic chub mackerel	Atlantic chub mackerel	Atlantic, Southwest	Marine fish	Scomber colias Gmelin, 1789	Atlantic chub mackerel	3.9	432527	4258	6374	6675	9698	10620	17706	32117	21767	69391	44510	35762	5697	4979	5104	5100	5214	5120	5100	5110	8049	5670	8306	9422	1595	6377	1580	5012	2171	3442	10030	3361	8262	4862	5363	5059	4708	5123	4421	5337
Brazil	BRA	Capture	Atlantic moonfish	Atlantic moonfish	Atlantic, Southwest	Marine fish	Selene setapinnis (Mitchill, 1815)	Atlantic moonfish	3.7	42961	0	0	0	0	0	0	0	0	0	0	0	0	0	0	0	0	0	0	0	2468	1679	1914	1512	1514	1386	1085	1857	2093	1909	1689	31	23	1965	2168	2046	1904	2072	1788	2158
Brazil	BRA	Capture	Atlantic sailfish	Atlantic sailfish	Atlantic, Southwest	Marine fish	Istiophorus albicans (Latreille, 1804)	Atlantic sailfish	4.5	9578	186	287	246	201	231	64	153	60	121	187	292	174	152	147	301	90	351	243	128	245	310	137	184	356	598	414	546	582	531	414	138	123	267	432	78	138	108	76	57
Brazil	BRA	Capture	Spadefishes nei	Atlantic spadefish	Atlantic, Southwest	Marine fish	Chaetodipterus faber (Broussonet, 1782)	Atlantic spadefish	4.5	5619	0	0	0	0	0	0	0	0	0	0	0	0	0	0	0	0	0	0	0	40	71	55	51	283	325	409	208	170	265	315	250	198	246	271	256	238	259	224	270
Brazil	BRA	Capture	Atlantic thread herring	Atlantic thread herring	Atlantic, Southwest	Marine fish	Opisthonema oglinum (Lesueur, 1818)	Atlantic thread herring	4.5	192609	0	0	0	0	0	0	0	0	0	0	0	0	0	0	0	0	0	0	0	6661	3762	3712	8082	8204	12455	4520	4581	7752	5754	4853	7673	13252	8375	9237	8710	8105	8820	7612	9189
Brazil	BRA	Capture	Atlantic white marlin	Atlantic white marlin	Atlantic, Southwest	Marine fish	Kajikia albida (Poey, 1860)	Atlantic white marlin	4.5	6101	68	275	175	133	58	100	76	81	61	87	143	93	149	204	205	377	211	301	91	105	75	105	217	158	106	172	407	263	79	245	92	70	57	53	36	75	71	352	102
Brazil	BRA	Capture	Ballyhoo halfbeak	Ballyhoo halfbeak	Atlantic, Southwest	Marine fish	Hemiramphus brasiliensis (Linnaeus, 1758)	Ballyhoo halfbeak	2.3	43850	484	658	0	698	649	1011	933	965	1132	801	472	560	489	501	500	511	500	500	500	631	494	442	1500	832	989	3342	3651	1735	1761	429	867	2081	1093	1205	1136	1057	1150	993	1198
Brazil	BRA	Capture	Banded astyanax	Banded astyanax	America, South - Inland waters	Freshwater fish	Psalidodon fasciatus (Cuvier, 1819)	Banded astyanax	3	17188	0	0	0	0	0	0	0	0	0	0	0	0	0	0	0	0	0	0	0	0	0	0	0	0	0	0	427	461	901	1032	953	938	1153	1056	1098	1035	1043	1052	1039
Brazil	BRA	Capture	Barracudas nei	Barracuda	Atlantic, Southwest	Marine fish	C11	Barracuda	4.46667	12115	100	149	89	138	336	131	126	157	164	227	234	210	183	188	180	184	180	180	180	20	11	12	828	217	527	338	371	389	396	419	346	375	373	412	389	362	394	340	410
Brazil	BRA	Capture	Barred grunt	Barred grunt	Atlantic, Southwest	Marine fish	Conodon nobilis (Linnaeus, 1758)	Barred grunt	3.6	42431	2945	4357	6765	7252	882	729	978	789	1017	1411	2378	1644	1437	1473	1400	1200	1000	700	500	339	172	118	114	84	39	56	106	177	133	137	154	161	147	163	154	143	156	134	162
Brazil	BRA	Capture	Barred sorubim	Barred sorubim	America, South - Inland waters	Freshwater fish	Pseudoplatystoma fasciatum (Linnaeus, 1766)	Barred sorubim	4.4	11795	0	0	0	0	0	0	0	0	0	0	0	0	0	0	0	0	0	0	0	0	0	0	0	0	0	0	0	0	0	0	0	0	1090	999	1038	979	987	995	982
Brazil	BRA	Capture	Bastard halibuts nei	Bastard halibut	Atlantic, Southwest	Marine fish	C14	Bastard halibut	4.15	97274	1476	1548	1597	2308	1137	1993	1130	1459	1344	1798	2842	2853	2493	2556	2500	2556	2510	2500	2500	1491	1091	1430	1655	1590	1844	2317	3300	2798	2173	2594	2411	2566	2550	2813	2658	2474	2692	2323	2804
Brazil	BRA	Capture	Sea chubs nei	Bermuda sea chub	Atlantic, Southwest	Marine fish	Kyphosus sectatrix (Linnaeus, 1758)	Bermuda sea chub	2	1008	0	0	0	0	0	0	0	0	0	0	0	0	0	0	0	0	0	0	0	0	0	0	0	0	0	0	132	60	47	57	54	44	51	56	53	49	53	46	56
Brazil	BRA	Capture	Bigeyes nei	Bigeye	Atlantic, Southwest	Marine fish	C15	Bigeyes nei	3.8	3491	0	0	0	0	0	0	0	0	0	0	0	0	0	0	0	0	0	0	0	70	59	55	46	60	67	45	59	66	70	89	102	398	190	210	198	184	201	173	209
Brazil	BRA	Capture	Bigeye scad	Bigeye scad	Atlantic, Southwest	Marine fish	Selar crumenophthalmus (Bloch, 1793)	Bigeye scad	3.8	10814	0	0	0	0	0	0	0	0	0	0	0	0	0	0	0	0	0	0	0	0	0	0	0	0	0	0	764	240	441	1151	458	262	618	682	646	601	654	565	682
Brazil	BRA	Capture	Bigeye thresher	Bigeye thresher	Atlantic, Southwest	Marine fish	Alopias superciliosus Lowe, 1841	Bigeye thresher	4.5	846	0	0	0	0	0	0	0	0	0	0	0	0	0	0	0	0	0	0	0	0	0	0	0	8	100	47	72	111	83	113	83	69	85	17	22	22	1	9	4
Brazil	BRA	Capture	Bigeye tuna	Bigeye tuna	Atlantic, Southwest	Marine fish	Thunnus obesus (Lowe, 1839)	Bigeye tuna	4.5	50510	678	1183	812	782	698	505	776	535	656	419	873	756	946	512	591	350	790	1256	596	1935	1707	1237	644	2024	2768	2660	2583	2456	1493	1081	1478	1595	958	1190	1151	1841	565	654	954
Brazil	BRA	Capture	Bigeye tuna	Bigeye tuna	Atlantic, Western Central	Marine fish	Thunnus obesus (Lowe, 1839)	Bigeye tuna	4.5	38218	0	0	0	0	0	0	0	0	0	0	0	0	0	0	0	0	0	0	0	0	0	0	0	0	0	0	0	0	0	0	0	0	0	0	0	0	1555	2970	5502
Brazil	BRA	Capture	Bigtooth corvina	Bigtooth corvina	Atlantic, Southwest	Marine fish	Isopisthus parvipinnis (Cuvier, 1830)	Bigtooth corvina	4	1260	0	0	0	0	0	0	0	0	0	0	0	0	0	0	0	0	0	0	0	0	0	0	0	0	0	0	2	2	2	104	131	16	83	91	86	80	87	75	91
Brazil	BRA	Capture	Black drum	Black drum	Atlantic, Southwest	Marine fish	Pogonias cromis (Linnaeus, 1766)	Black drum	3.4	21831	2298	3216	2584	1220	906	907	1009	928	851	703	916	862	753	772	770	787	770	770	770	38	1	0	0	0	0	0	0	0	0	0	0	0	0	0	0	0	0	0	0
Brazil	BRA	Capture	Blackfin goosefish	Blackfin goosefish	Atlantic, Southwest	Marine fish	Lophius gastrophysus Miranda Ribeiro, 1915	Blackfin goosefish	4.5	59404	0	0	0	0	0	0	0	0	0	0	0	0	0	0	0	0	0	0	0	366	294	399	542	794	1937	7094	5143	2665	2434	2550	2517	2508	2488	2744	2592	2412	2625	2265	2735
Brazil	BRA	Capture	Blackfin tuna	Blackfin tuna	Atlantic, Southwest	Marine fish	Thunnus atlanticus (Lesson, 1831)	Blackfin tuna	4.4	9781	56	273	195	173	181	85	89	57	203	133	172	254	229	120	335	130	49	22	37	153	649	418	55	55	38	148	1669	1	118	90	243	233	315	348	329	46	124	110	299
Brazil	BRA	Capture	Requiem sharks nei	Blacktip shark	Atlantic, Southwest	Marine fish	Carcharhinus limbatus (Müller & Henle, 1839)	Blacktip shark	4.4	7776	0	0	0	0	0	0	0	0	0	0	0	0	0	0	0	0	0	0	0	0	0	0	0	0	0	0	0	1999	0	157	463	1408	383	1350	940	946	130	0	0
Brazil	BRA	Capture	Blue marlin	Blue marlin	Atlantic, Southwest	Marine fish	Makaira nigricans Lacepède, 1802	Blue marlin	4.5	7458	41	100	49	34	23	28	30	27	32	33	46	51	74	60	52	61	125	147	81	180	331	193	486	509	467	781	387	579	195	610	300	261	182	150	134	63	48	114	105
Brazil	BRA	Capture	Blue runner	Blue runner	Atlantic, Southwest	Marine fish	Caranx crysos (Mitchill, 1815)	Blue runner	4.1	29963	0	0	0	0	0	0	0	0	0	0	0	0	0	0	0	0	0	0	0	338	503	515	443	590	625	680	688	930	854	1592	1813	1384	1568	1730	1634	1520	1654	1428	1724
Brazil	BRA	Capture	Blue shark	Blue shark	Atlantic, Southwest	Marine fish	Prionace glauca (Linnaeus, 1758)	Blue shark	4.4	45728	0	0	0	0	0	0	0	0	0	0	0	0	0	0	0	0	150	800	0	0	743	1103	0	179	1689	2173	1971	2168	1669	2523	2591	2318	2000	1274	1500	1980	1607	2013	2551
Brazil	BRA	Capture	Bluefish	Bluefish	Atlantic, Southwest	Marine fish	Pomatomus saltatrix (Linnaeus, 1766)	Bluefish	4.5	225854	9329	12068	10946	11040	4562	7199	7949	7319	5552	7792	4858	6163	5386	5521	5500	5622	5520	5510	5520	7588	5866	2616	2504	2064	3314	3435	3924	4127	3160	2213	4344	3926	3585	3954	3731	3472	3778	3261	3936
Brazil	BRA	Capture	Atlantic searobins	Bluewing searobin	Atlantic, Southwest	Marine fish	Prionotus punctatus (Bloch, 1793)	Bluewing searobin	3.8	115438	62	28	28	29	9	24	17	27	48	194	650	1029	899	922	920	941	930	930	930	922	792	540	858	1149	1839	4560	6057	3189	4419	7637	5660	5246	5273	5816	5493	5112	5563	4801	5795
Brazil	BRA	Capture	Bocon toadfish	Bocon toadfish	Atlantic, Southwest	Marine fish	Amphichthys cryptocentrus (Valenciennes, 1837)	Bocon toadfish	3.8	5307	0	0	0	0	0	0	0	0	0	0	0	0	0	0	0	0	0	0	0	0	0	0	0	0	0	0	105	239	218	304	340	311	312	344	325	303	329	284	343
Brazil	BRA	Capture	Brazilian codling	Brazilian codling	Atlantic, Southwest	Marine fish	Urophycis brasiliensis (Kaup, 1858)	Brazilian codling	3.9	138072	432	469	377	627	166	585	493	1627	3120	2347	1195	1121	980	1005	1000	1022	1000	1000	1000	2924	2311	2116	2408	1807	2225	6334	8207	5664	3863	4869	4825	6579	5312	5859	5532	5148	5602	4835	5836
Brazil	BRA	Capture	Brazilian flathead	Brazilian flathead	Atlantic, Southwest	Marine fish	Percophis brasiliensis Quoy & Gaimard, 1825	Brazilian flathead	4.2	17401	0	0	0	0	0	0	0	0	0	0	0	0	0	0	0	0	0	0	0	640	460	412	514	709	607	633	747	714	696	738	593	941	741	818	772	719	782	675	815
Brazil	BRA	Capture	Brazilian menhaden	Brazilian menhaden	Atlantic, Southwest	Marine fish	Brevoortia aurea (Spix & Agassiz, 1829)	Brazilian menhaden	2.8	107069	1405	2600	2854	3143	3748	2642	2181	2348	6077	3477	7375	3868	3381	3466	3400	3476	3420	3400	3410	11133	6294	2396	2936	2202	1123	344	734	879	876	712	735	1078	823	908	857	797	868	749	904
Brazil	BRA	Capture	Brazilian sardinella	Brazilian sardinella	Atlantic, Southwest	Marine fish	Sardinella brasiliensis (Steindachner, 1879)	Brazilian sardinella	3.1	3425520	105276	145576	144685	149542	146276	111967	98873	139377	137210	123961	126180	91241	65139	78106	32081	64294	64842	49991	84635	60212	97092	117642	82283	25518	17053	39847	22054	25266	53421	42657	54201	55940	74631	83286	62134	75015	95920	98315	51781
Brazil	BRA	Capture	Frigate and bullet tunas	Bullet tuna	Atlantic, Southwest	Marine fish	Auxis rochei (Risso, 1810)	Bullet tuna	4.4	19229	0	0	0	0	0	48	72	265	634	623	941	1260	1904	700	592	746	291	608	906	558	527	215	162	166	106	98	1117	860	413	532	604	203	149	314	204	347	353	633	293
Brazil	BRA	Capture	Cachama	Cachama	America, South - Inland waters	Freshwater fish	Colossoma macropomum (Cuvier, 1816)	Cachama	2	103805	0	0	0	0	0	0	0	0	0	0	0	0	0	0	0	0	0	0	0	11379	4298	2838	2760	2905	4965	3789	4096	3206	3372	3342	4562	4565	4413	4045	4204	3964	3995	4029	3978
Brazil	BRA	Capture	Cyprinids nei	Carp	America, South - Inland waters	Freshwater fish	C351	Carp	2.38	11524	12	44	55	29	65	128	105	174	175	214	146	109	96	99	100	102	100	100	100	119	284	212	258	302	355	390	406	430	441	447	440	440	470	430	448	422	425	429	423
Brazil	BRA	Capture	Chola guitarfish	Chola guitarfish	Atlantic, Southwest	Marine fish	Pseudobatos percellens (Walbaum, 1792)	Chola guitarfish	3.6	32357	2349	2554	2845	737	2510	1673	1921	2259	2309	2239	1297	1279	1118	1146	1100	1125	1110	1110	1110	162	404	0	0	0	0	0	0	0	0	0	0	0	0	0	0	0	0	0	0
Brazil	BRA	Capture	Cobia	Cobia	Atlantic, Southwest	Marine fish	Rachycentron canadum (Linnaeus, 1766)	Cobia	4	23070	0	0	0	0	0	0	0	0	0	0	0	0	0	0	0	0	0	0	0	256	498	367	622	1818	1580	1036	1375	1146	919	1161	898	635	885	976	923	859	935	807	974
Brazil	BRA	Capture	Common dolphinfish	Common dolphinfish	Atlantic, Southwest	Marine fish	Coryphaena hippurus Linnaeus, 1758	Common dolphinfish	4.4	149278	2504	3579	4811	4115	557	563	748	1053	1861	1476	1985	2000	1748	1792	1700	1738	1710	1710	1720	3186	2500	4028	4117	2848	4359	4326	4956	7266	6393	13199	8149	8873	7786	8588	7999	4379	641	775	762
Brazil	BRA	Capture	Sawfishes	Common sawfish	Atlantic, Southwest	Marine fish	Pristis pristis (Linnaeus, 1758)	Common sawfish	4	19217	1467	1488	1759	1074	1311	1152	1717	1296	886	746	717	772	675	692	690	705	690	690	690	0	0	0	0	0	0	0	0	0	0	0	0	0	0	0	0	0	0	0	0
Brazil	BRA	Capture	Dana swimcrab	Crab	Atlantic, Southwest	Crustacean	Crustacean	Crustacean	2.5	128370	3716	4259	4810	3382	4273	3954	5331	4924	4852	4734	4913	4597	4018	4119	4100	3600	3300	2800	2500	2062	2020	2600	3014	1626	1597	1062	1224	940	1345	2761	2415	1461	2181	2405	2274	2243	2466	2226	2246
Brazil	BRA	Capture	Marine crabs nei	Crab	Atlantic, Southwest	Crustacean	Crustacean	Crustacean	2.5	466846	6141	6637	6567	7634	11077	13010	13280	13662	13760	18403	14133	15114	13209	13541	13500	13801	13560	13530	13560	11917	9922	10233	9202	10913	11135	12695	10536	10531	9308	10151	7977	6818	8185	9027	8535	8755	9628	8690	8769
Brazil	BRA	Capture	Southwest Atlantic red crab	Crab	Atlantic, Southwest	Crustacean	Crustacean	Crustacean	2.5	7880	0	0	0	0	0	0	0	0	0	0	0	0	0	0	0	0	0	0	0	0	0	0	0	0	0	0	2163	2209	1750	1465	292	1	0	0	0	0	0	0	0
Brazil	BRA	Capture	Croakers, drums nei	Croaker, drum	Atlantic, Southwest	Marine fish	C42	Croaker and drum	3.6	4272	0	0	0	0	0	0	0	0	0	0	0	0	0	0	0	0	0	0	0	69	150	52	57	36	34	164	0	0	0	0	0	0	307	338	320	298	324	280	338
Brazil	BRA	Capture	Freshwater crustaceans nei	Crustacean	America, South - Inland waters	Crustacean	Crustacean	Crustacean	2.5	6256	2151	2896	789	323	0	0	9	0	0	0	15	9	8	9	9	9	9	10	10	0	0	0	0	0	0	0	0	0	0	0	0	0	0	0	0	0	0	0	0
Brazil	BRA	Capture	Marine crustaceans nei	Crustacean	Atlantic, Southwest	Crustacean	Crustacean	Crustacean	2.5	27241	3	6	0	9	833	1222	958	1032	1483	707	924	837	732	750	750	767	750	750	750	287	288	310	244	266	227	223	377	390	354	492	431	484	1045	1153	1093	736	810	731	737
Brazil	BRA	Capture	Dorado	Dorado	America, South - Inland waters	Freshwater fish	Coryphaena hippurus Linnaeus, 1758	Dorado	4.4	35881	0	0	0	0	0	0	0	0	0	0	0	0	0	0	0	0	0	0	0	0	0	0	0	0	0	0	0	0	0	0	0	0	3319	3042	3162	2981	3005	3030	2992
Brazil	BRA	Capture	Duckbill catfish	Duckbill catfish	America, South - Inland waters	Freshwater fish	Sorubim lima (Bloch & Schneider, 1801)	Duckbill catfish	4.1	2620	0	0	0	0	0	0	0	0	0	0	0	0	0	0	0	0	0	0	0	0	0	0	0	0	0	0	0	0	0	0	0	0	242	222	231	217	219	221	218
Brazil	BRA	Capture	Cusk-eels, brotulas nei	Eel	Atlantic, Southwest	Marine fish	C47	Eel	3.78	13894	0	0	0	0	0	0	0	0	0	0	0	0	0	0	0	0	0	0	0	106	176	258	452	544	507	711	808	824	577	642	576	626	583	643	608	566	615	531	641
Brazil	BRA	Capture	Flyingfishes nei	Flyingfish	Atlantic, Southwest	Marine fish	C72	Flyingfish	3.35714	38897	810	877	987	644	734	1208	1276	687	1134	1026	891	734	641	657	650	664	650	650	650	1036	743	1082	1084	760	388	217	708	698	1289	726	1063	1256	1014	1119	1056	982	1069	923	1114
Brazil	BRA	Capture	Freshwater fishes nei	Freshwater fish	America, South - Inland waters	Freshwater fish	Weighted mean	Freshwater fish	3.12845	856720	19481	13527	15614	22603	33659	29394	24785	26438	24263	21505	28979	30504	23538	31898	15499	12961	14550	18698	18849	40372	39421	34667	34887	34074	15473	18852	20152	17964	19022	15425	14413	14491	20870	19129	25926	5074	5114	5157	5092
Brazil	BRA	Capture	Gilded catfish	Gilded catfish	America, South - Inland waters	Freshwater fish	Zungaro zungaro (Humboldt, 1821)	Gilded catfish	4.5	219876	0	0	0	0	0	0	0	0	0	0	0	0	0	0	0	0	0	0	0	4288	10612	11218	8272	14280	12229	12553	16607	16946	20057	19556	11599	11377	15094	13835	14379	788	794	801	791
Brazil	BRA	Capture	Freshwater siluroids nei	Granulated catfish	America, South - Inland waters	Freshwater fish	Pterodoras granulosus (Valenciennes, 1821)	Granulated catfish	2.6	1595328	47247	66215	67965	33385	51314	50619	51881	56647	47339	50165	51897	47322	41818	42801	42800	43754	42853	43900	44900	25663	19518	19825	20137	20647	39799	35067	38065	38238	40214	43428	44578	40080	38832	35596	30015	15965	16091	16227	16021
Brazil	BRA	Capture	Green weakfish	Green weakfish	Atlantic, Southwest	Marine fish	Cynoscion virescens (Cuvier, 1830)	Green weakfish	4	13557	0	0	0	0	0	0	0	0	0	0	0	0	0	0	0	0	0	0	0	0	0	0	0	0	0	0	460	419	1136	1488	431	331	743	820	778	724	787	680	820
Brazil	BRA	Capture	Brazilian groupers nei	Grouper	Atlantic, Southwest	Marine fish	C18	Grouper	4.16	61156	1195	2192	1597	1437	939	884	793	984	942	2117	1126	1228	1073	1100	1100	1125	1110	1110	1110	1117	423	584	518	628	536	1040	1357	1826	1770	2128	1757	1781	1856	2047	1935	1800	1959	1691	2041
Brazil	BRA	Capture	Groupers nei	Grouper	Atlantic, Southwest	Marine fish	C91	Grouper	4.08	80004	1471	1894	610	1883	1473	1800	1994	2131	2398	2027	2402	2628	2297	2355	2300	2351	2310	2300	2300	2286	2341	2170	2315	1710	2670	2143	2110	938	659	1855	735	833	722	795	751	1730	1882	1624	1961
Brazil	BRA	Capture	Grunts, sweetlips nei	Grunt, sweetlips	Atlantic, Southwest	Marine fish	C99	Grunt and sweetlips	3.41667	73681	0	0	0	0	0	0	0	0	0	0	0	0	0	0	0	0	0	0	0	1812	2081	1936	2000	2382	3024	3380	3228	2581	2459	2811	3254	3792	3219	3550	3298	3118	3393	2928	3535
Brazil	BRA	Capture	Loweye catfishes nei	Highwaterman catfish	America, South - Inland waters	Freshwater fish	Hypophthalmus edentatus Spix & Agassiz, 1829	Highwaterman catfish	2.9	79658	0	0	0	0	0	0	0	0	0	0	0	0	0	0	0	0	0	0	0	0	0	0	0	0	0	0	0	0	0	0	0	0	0	0	0	9027	9098	9175	9058
Brazil	BRA	Capture	Irish mojarra	Irish mojarra	Atlantic, Southwest	Marine fish	Diapterus auratus Ranzani, 1842	Irish mojarra	2.4	35899	0	0	0	0	0	0	0	0	0	0	0	0	0	0	0	0	0	0	0	0	0	0	0	0	0	0	1603	2573	2592	1708	2087	2074	1918	2115	1997	1858	2022	1745	2107
Brazil	BRA	Capture	Jacks, crevalles nei	Jack	Atlantic, Southwest	Marine fish	C128	Jack	4.15	311061	3769	4959	6756	3397	11876	14583	16928	15722	23762	27778	5493	5107	4463	4575	4500	4600	4520	4510	4520	3656	3905	5838	5635	4164	6950	5397	4923	5763	5649	5669	5451	6971	5716	6304	5952	5540	6028	5202	6280
Brazil	BRA	Capture	Jamaica weakfish	Jamaica weakfish	Atlantic, Southwest	Marine fish	Cynoscion jamaicensis (Vaillant & Bocourt, 1883)	Jamaica weakfish	3.8	51262	0	0	0	0	0	0	0	0	0	0	0	0	0	0	0	0	0	0	0	0	0	0	0	0	0	0	1764	2068	2486	2731	3393	2776	2946	3249	3068	2855	3107	2682	3237
Brazil	BRA	Capture	Weakfishes nei	Jamaica weakfish	Atlantic, Southwest	Marine fish	Cynoscion jamaicensis (Vaillant & Bocourt, 1883)	Jamaica weakfish	3.8	1202133	49138	47063	46434	45762	44761	57790	52804	60055	64094	53814	40619	38650	33779	34627	34600	34000	33000	30000	28000	27075	26470	25960	26677	39332	43523	44268	8820	8225	8544	7229	12220	19239	6185	6822	6435	5989	6517	5624	6789
Brazil	BRA	Capture	King mackerel	King mackerel	Atlantic, Southwest	Marine fish	Scomberomorus cavalla (Cuvier, 1829)	King mackerel	4.4	67863	555	793	851	917	1599	1613	1929	2695	2588	827	3031	2173	2029	2102	2070	962	979	1380	1365	1328	2890	2398	3595	3595	2344	1251	2316	3311	247	202	316	33	4232	4683	4473	1	0	0	0
Brazil	BRA	Capture	King weakfish	King weakfish	Atlantic, Southwest	Marine fish	Macrodon ancylodon (Bloch & Schneider, 1801)	King weakfish	3.9	177411	0	0	0	0	0	0	0	0	0	0	0	0	0	0	0	0	0	0	0	3677	5143	6006	6708	4278	5475	2641	4220	3278	2942	3048	3613	3651	10099	11139	10507	9778	10640	9183	11085
Brazil	BRA	Capture	Kissing prochilodus	Kissing prochilodus	America, South - Inland waters	Freshwater fish	Semaprochilodus insignis (Jardine, 1841)	Kissing prochilodus	2	276507	0	0	0	0	0	0	0	0	0	0	0	0	0	0	0	0	0	0	0	0	0	0	0	0	0	0	12941	11924	16529	15067	16153	17474	17252	15813	16435	15498	15619	15751	15551
Brazil	BRA	Capture	Kumakuma	Kumakuma	America, South - Inland waters	Freshwater fish	Brachyplatystoma filamentosum (Lichtenstein, 1819)	Kumakuma	4.5	27380	0	0	0	0	0	0	0	0	0	0	0	0	0	0	0	0	0	0	0	0	0	0	0	0	0	0	0	0	0	0	0	0	0	0	0	3099	3123	3149	3109
Brazil	BRA	Capture	Ladyfish	Ladyfish	Atlantic, Southwest	Marine fish	Elops saurus Linnaeus, 1766	Ladyfish	3.5	1397	40	32	34	45	46	41	42	58	71	99	93	89	78	80	80	82	80	80	80	147	0	0	0	0	0	0	0	0	0	0	0	0	0	0	0	0	0	0	0
Brazil	BRA	Capture	Lane snapper	Lane snapper	Atlantic, Southwest	Marine fish	Lutjanus synagris (Linnaeus, 1758)	Lane snapper	3.8	39197	0	0	0	0	0	0	0	0	0	0	0	0	0	0	0	0	0	0	0	506	648	659	1038	1031	1014	1437	1392	1631	1306	1778	1863	2036	1855	2046	1933	1799	1957	1689	2039
Brazil	BRA	Capture	Largehead hairtail	Largehead hairtail	Atlantic, Southwest	Marine fish	Trichiurus lepturus Linnaeus, 1758	Largehead hairtail	4.4	79122	1160	1078	1597	3156	1434	2037	1453	615	1516	1729	1425	1320	1154	1183	1100	1125	1110	1110	1110	1197	736	938	1405	1230	1665	2886	2863	1459	1706	1846	1999	3390	2424	2673	2523	2348	2555	2205	2662
Brazil	BRA	Capture	Laulao catfish	Laulao catfish	America, South - Inland waters	Freshwater fish	Brachyplatystoma vaillantii (Valenciennes, 1840)	Laulao catfish	4.5	552139	0	0	0	0	0	0	0	0	0	0	0	0	0	0	0	0	0	0	0	10097	17172	21558	21457	22087	18642	23126	24149	19698	22547	21284	28195	23557	25830	23676	24607	23204	23385	23584	23284
Brazil	BRA	Capture	Characins nei	Leporinus	America, South - Inland waters	Freshwater fish	C30	Leporinus	3	2188562	60808	66882	62139	50079	72155	85168	97271	85998	103026	97787	97731	105502	93232	95423	95400	92500	85000	83000	81000	41962	43525	33628	29804	31605	45309	49491	21519	22094	19460	20569	23584	23760	9222	8454	14725	15828	15952	16087	15883
Brazil	BRA	Capture	Little tunny(=Atl.black skipj)	Little tunny	Atlantic, Southwest	Marine fish	Euthynnus alletteratus (Rafinesque, 1810)	Little tunny	4.5	16597.4	0	0	0	0	0	0	10	0	765	785	479	187	108	74	685	779	935	985	1225	1059	834	507	920	930	615	615	615	0	320	280	454	397	444	490	463	22	581	0	0
Brazil	BRA	Capture	Caribbean spiny lobster	Lobster	Atlantic, Southwest	Crustacean	Crustacean	Crustacean	2.5	316505	3583	5268	6268	7826	6218	7331	7426	4057	8189	6929	6176	6930	7087	7090	9223	11059	9127	9100	9120	10817	8026	7502	6002	6334	6469	7139	6807	6320	8689	6927	6724	6479	6589	7268	6866	6776	7451	6726	6787
Brazil	BRA	Capture	Tropical spiny lobsters nei	Lobster	Atlantic, Southwest	Crustacean	Crustacean	Crustacean	2.5	21447	3368	3033	3639	3207	1805	1508	1358	952	714	1148	715	0	0	0	0	0	0	0	0	0	0	0	0	0	0	0	0	0	0	0	0	0	0	0	0	0	0	0	0
Brazil	BRA	Capture	Longbill spearfish	Longbill spearfish	Atlantic, Southwest	Marine fish	Tetrapturus pfluegeri Robins & de Sylva, 1963	Longbill spearfish	4.4	497	0	0	0	0	0	0	0	0	0	0	0	0	0	0	0	0	0	0	0	0	0	0	0	0	27	55	38	2	0	0	6	4	0	0	0	24	4	325	6
Brazil	BRA	Capture	Mackerels nei	Mackerel	Atlantic, Southwest	Marine fish	C148	Mackerel	3.86667	5769	0	0	0	0	0	0	0	0	0	0	0	0	0	0	0	0	0	0	0	0	0	0	0	0	0	0	0	0	0	0	0	0	1835	2023	1911	0	0	0	0
Brazil	BRA	Capture	Manduba	Manduba	America, South - Inland waters	Freshwater fish	Ageneiosus inermis (Linnaeus, 1766)	Manduba	4	18671	0	0	0	0	0	0	0	0	0	0	0	0	0	0	0	0	0	0	0	0	0	0	0	0	0	0	0	0	0	0	0	0	0	0	0	2116	2132	2150	2123
Brazil	BRA	Capture	Marbled swamp eel	Marbled swamp eel	America, South - Inland waters	Freshwater fish	Synbranchus marmoratus Bloch, 1795	Marbled swamp eel	2.8	389	0	0	0	0	0	0	0	0	0	0	0	0	0	0	0	0	0	0	0	0	0	0	0	0	0	0	0	0	0	0	0	0	36	33	34	32	33	33	33
Brazil	BRA	Capture	Marine fishes nei	Marine fish	Atlantic, Southwest	Marine fish	Weighted mean	Marine fish	3.60503	3617977	62289	41069	40165	102889	133011	118189	116870	142903	143050	159973	201625	266662	241254	172331	76211	88595	99689	135473	137826	45188	43419	46660	36881	65016	64855	59003	63312	57578	57506	54440	65263	60823	38313	42953	40911	38177	42526	35330	32749
Brazil	BRA	Capture	Marlins,sailfishes,etc. nei	Marlin, sailfish	Atlantic, Southwest	Marine fish	C155	Marlin and sailfish	4.5	291	0	0	0	0	0	0	0	0	0	21	0	0	0	0	0	0	0	0	0	0	0	0	0	0	18	2	0	4	29	0	19	3	0	0	0	116	79	0	0
Brazil	BRA	Capture	Mullets nei	Mullet	Atlantic, Southwest	Marine fish	C162	Mullet	2.16667	763796	35513	29947	28657	18288	19876	19019	25875	22652	24008	23933	21204	16645	14547	14912	14900	15232	14970	14940	14970	13324	7722	10262	10006	10886	11987	11075	11143	13204	13929	16554	14130	21864	17153	18919	17866	16627	18093	15615	18849
Brazil	BRA	Capture	Seerfishes nei	Narrow-barred Spanish mackerel	Atlantic, Southwest	Marine fish	Scomberomorus commerson (Lacepède, 1800)	Narrow-barred Spanish Mackerel	4.5	111461	0	0	0	0	0	0	0	0	0	0	0	0	0	0	0	0	0	0	0	0	0	0	0	0	0	0	0	0	0	0	0	0	9187	10133	9573	8909	9694	8366	10099
Brazil	BRA	Capture	Oceanic whitetip shark	Oceanic whitetip shark	Atlantic, Southwest	Marine fish	Carcharhinus longimanus (Poey, 1861)	Oceanic whitetip shark	4.2	2160	0	0	0	0	0	0	0	0	0	0	0	0	0	0	0	0	0	0	0	0	0	0	0	0	638	534	203	174	187	78	76	14	240	0	0	0	0	7	6
Brazil	BRA	Capture	Morays nei	Ocellated moray	Atlantic, Southwest	Marine fish	Gymnothorax ocellatus Agassiz, 1831	Ocellated moray	4.1	497	0	0	0	0	0	0	0	0	0	0	0	0	0	0	0	0	0	0	0	0	0	0	0	0	0	0	0	0	0	0	0	0	41	46	43	40	44	38	45
Brazil	BRA	Capture	Octopuses, etc. nei	Octopus	Atlantic, Southwest	Cephalopod	Cephalopod	Cephalopod	3	46217	83	247	233	283	177	256	318	151	742	666	571	710	621	637	630	644	630	630	630	577	459	640	554	906	1032	1193	914	1028	1518	1783	2104	2195	1987	2192	2069	1883	2070	1869	1885
Brazil	BRA	Capture	Oscar	Oscar	America, South - Inland waters	Freshwater fish	Astronotus ocellatus (Agassiz, 1831)	Oscar	2.8	22083	0	0	0	0	0	0	0	0	0	0	0	0	0	0	0	0	0	0	0	0	0	0	0	0	0	0	0	0	0	0	0	0	2040	1870	1943	1832	1847	1862	1839
Brazil	BRA	Capture	Parrotfishes nei	Parrotfish	Atlantic, Southwest	Marine fish	C180	Parrotfish	2	5804	0	0	0	0	0	0	0	0	0	0	0	0	0	0	0	0	0	0	0	0	0	0	302	361	494	162	137	140	364	280	357	135	254	280	264	246	268	231	279
Brazil	BRA	Capture	Cichlids nei	Peacock cichlid	America, South - Inland waters	Freshwater fish	Cichla ocellaris Bloch & Schneider, 1801	Peacock cichlid	4.5	530142	6220	8766	10946	6064	7784	8695	9571	10411	9976	11233	14583	16323	14424	14763	14700	15028	14720	15100	15450	12045	8565	8356	7785	7375	8435	13534	12029	11921	13733	14371	16921	15085	14365	13168	13693	12912	13013	13123	12956
Brazil	BRA	Capture	Pelagic percomorphs nei	Pelagic fish	Atlantic, Southwest	Marine fish	Weighted mean	Pelagic fish	3.60503	4948	472	488	55	278	118	132	134	160	159	148	451	324	283	290	290	296	290	290	290	0	0	0	0	0	0	0	0	0	0	0	0	0	0	0	0	0	0	0	0
Brazil	BRA	Capture	Pirapatinga	Pirapitinga	America, South - Inland waters	Freshwater fish	Piaractus brachypomus (Cuvier, 1818)	Pirapitinga	2.5	36987	0	0	0	0	0	0	0	0	0	0	0	0	0	0	0	0	0	0	0	0	0	0	0	0	0	0	2344	1493	2016	1999	2130	2304	2279	2089	2238	2047	2063	2081	2054
Brazil	BRA	Capture	Pompanos nei	Pompano	Atlantic, Southwest	Marine fish	C183	Pompano	3.875	16924	0	0	0	0	0	0	0	0	0	0	0	0	0	0	0	0	0	0	0	424	534	166	172	144	286	273	211	191	536	649	453	152	1048	1155	1094	1018	1108	956	1154
Brazil	BRA	Capture	Porthole shovelnose catfish	Porthole shovelnose catfish	America, South - Inland waters	Freshwater fish	Hemisorubim platyrhynchos (Valenciennes, 1840)	Porthole shovelnose catfish	4.5	224	0	0	0	0	0	0	0	0	0	0	0	0	0	0	0	0	0	0	0	0	0	0	0	0	0	0	16	16	15	14	12	11	13	12	12	12	12	12	12
Brazil	BRA	Capture	Atlantic seabob	Prawn	Atlantic, Southwest	Crustacean	Crustacean	Crustacean	2.5	533863	10320	13505	14774	14833	14586	15580	13489	11069	11865	11860	9818	11415	9045	10311	5965	4657	4860	4850	4860	7278	11764	15257	13755	9964	11948	12155	11786	11382	12185	15788	13943	15060	14659	16168	15276	15075	16577	14963	15098
Brazil	BRA	Capture	River prawns nei	Prawn	America, South - Inland waters	Crustacean	Crustacean	Crustacean	2.5	264964	6786	7062	9742	6574	9854	10118	10394	10513	8416	9751	9578	7562	6524	6592	6600	6810	6560	6700	6900	1412	2677	2157	1506	3235	2437	3671	2820	3648	6317	5242	5127	6612	6022	5520	5737	5410	5452	5498	5428
Brazil	BRA	Capture	Prochilods nei	Prochilod	America, South - Inland waters	Freshwater fish	C196	Prochilod	2.2	742904	0	0	0	0	0	0	0	0	0	0	0	0	0	0	0	0	0	0	0	39471	37073	31645	31179	33544	33148	40741	30839	30792	29091	27258	28706	28301	29845	27356	28432	26811	27020	27249	26903
Brazil	BRA	Capture	Puffers nei	Puffer	Atlantic, Southwest	Marine fish	C197	Puffer	3.95	16721	0	0	0	0	0	0	0	0	0	0	0	0	0	0	0	0	0	0	0	468	18	88	23	16	35	34	201	143	297	682	724	409	596	657	621	578	629	543	1809
Brazil	BRA	Capture	Rainbow trout	Rainbow trout	America, South - Inland waters	Freshwater fish	Oncorhynchus mykiss (Walbaum, 1792)	Rainbow trout	4.1	346	0	0	0	0	0	0	0	79	119	91	0	2	5	5	5	10	10	10	10	0	0	0	0	0	0	0	0	0	0	0	0	0	0	0	0	0	0	0	0
Brazil	BRA	Capture	Raphael catfish	Raphael catfish	America, South - Inland waters	Freshwater fish	Platydoras costatus (Linnaeus, 1758)	Raphael catfish	3	4167	0	0	0	0	0	0	0	0	0	0	0	0	0	0	0	0	0	0	0	0	0	0	0	0	0	0	486	177	364	268	196	185	230	211	219	206	208	210	207
Brazil	BRA	Capture	Rays, stingrays, mantas nei	Ray, stingray, manta	Atlantic, Southwest	Marine fish	C203	Ray and stingray and manta	3.4125	226120	2221	3180	4118	3810	3892	3797	3904	4170	4644	4994	4950	4687	4096	4199	4100	3900	3700	3500	3000	3948	3104	3010	4673	4277	4867	5100	7634	6497	7505	8996	7240	5279	6784	7482	7073	6582	7163	6182	7462
Brazil	BRA	Capture	Red grouper	Red grouper	Atlantic, Southwest	Marine fish	Epinephelus morio (Valenciennes, 1828)	Red grouper	3.5	55935	1739	4008	4181	3296	1596	1467	1350	1782	1540	1975	1834	2094	1830	1876	1800	1840	1810	1810	1820	872	320	238	212	666	1220	881	1204	2380	1714	1273	1104	863	1062	1171	1107	0	0	0	0
Brazil	BRA	Capture	Piranhas nei	Red piranha	America, South - Inland waters	Freshwater fish	Pygocentrus nattereri Kner, 1858	Red piranha	3.7	130617	0	0	0	0	0	0	0	0	0	0	0	0	0	0	0	0	0	0	0	0	0	0	0	0	0	0	11661	11485	11153	10858	10766	11090	11591	10624	11042	3438	3465	3494	3450
Brazil	BRA	Capture	Red porgy	Red porgy	Atlantic, Southwest	Marine fish	Pagrus pagrus (Linnaeus, 1758)	Red porgy	3.9	49923	0	0	0	0	336	607	293	670	75	136	228	146	127	130	130	133	130	130	130	83	884	1572	1448	1362	1497	1443	1735	1850	2086	2235	2318	2051	2139	2360	2229	2074	2257	1948	2351
Brazil	BRA	Capture	Redtail catfish	Redtail catfish	America, South - Inland waters	Freshwater fish	Phractocephalus hemioliopterus (Bloch & Schneider, 1801)	Redtail catfish	4.2	8195	0	0	0	0	0	0	0	0	0	0	0	0	0	0	0	0	0	0	0	0	0	0	0	0	0	0	0	0	0	0	0	0	758	695	723	681	687	692	684
Brazil	BRA	Capture	Rough scad	Rough scad	Atlantic, Southwest	Marine fish	Trachurus lathami Nichols, 1920	Rough scad	4	26396	0	0	0	0	0	0	0	0	0	0	0	0	0	0	0	0	0	0	0	536	389	313	81	25	40	295	331	939	660	1275	1047	2291	1502	1656	1563	1455	1583	1366	1649
Brazil	BRA	Capture	Percoids nei	Sand perch	Atlantic, Southwest	Marine fish	Diplectrum formosum (Linnaeus, 1766)	Sand perch	4.5	39196	1446	1524	377	1010	1522	1278	1391	1649	1849	1682	1869	2698	2358	2418	2400	2000	1500	1000	800	720	664	692	1838	947	1465	2099	0	0	0	0	0	0	0	0	0	0	0	0	0
Brazil	BRA	Capture	Silversides(=Sand smelts) nei	Sand smelt	Atlantic, Southwest	Marine fish	Odontesthes incisa (Jenyns, 1841)	Sand smelt	3.4	6012	412	204	233	465	492	502	436	510	581	330	150	194	169	173	170	174	170	170	170	40	52	62	52	17	39	5	5	5	2	14	1	1	1	1	1	1	1	1	1
Brazil	BRA	Capture	Clupeoids nei	Sardine, Pilchard	Atlantic, Southwest	Marine fish	C33	Sardine and Pilchard	3.23333	390573	0	0	0	0	0	0	0	0	0	0	0	0	0	0	0	0	0	0	0	2775	3464	4314	6042	7527	11457	26978	25930	18357	19797	15923	17350	18190	16780	18508	17477	16264	17698	15274	18438
Brazil	BRA	Capture	Scaled sardines	Scaled herring	Atlantic, Southwest	Marine fish	Harengula jaguana Poey, 1865	Scaled herring	3.4	6974	30	580	601	140	0	0	0	0	0	0	0	0	0	0	0	0	0	0	0	0	20	12	2	162	126	210	326	358	335	296	298	226	268	296	280	260	283	245	295
Brazil	BRA	Capture	Scalloped hammerhead	Scalloped hammerhead	Atlantic, Southwest	Marine fish	Sphyrna lewini (Griffith & Smith, 1834)	Scalloped hammerhead	4.1	3062	0	0	0	0	0	0	0	0	0	0	0	0	0	0	0	0	0	100	0	0	25	170	0	30	262	507	508	286	170	175	177	120	122	87	74	146	103	0	0
Brazil	BRA	Capture	Sea catfishes nei	Sea catfish	Atlantic, Southwest	Marine fish	C225	Sea catfish	3.75	1102510	16115	18078	17612	15342	29626	30436	31185	31839	30155	29019	15900	15294	13366	13702	13700	14006	13760	13730	13760	14226	16946	17736	21605	28482	33597	41349	36601	29553	33235	29503	30349	28781	30073	33170	31330	29184	31728	27383	33054
Brazil	BRA	Capture	Serra Spanish mackerel	Serra Spanish mackerel	Atlantic, Southwest	Marine fish	Scomberomorus brasiliensis Collette, Russo & Zavala-Camin, 1978	Serra Spanish mackerel	3.3	76389	283	986	1522	1191	2826	3466	4342	4511	6259	1504	5011	4741	5063	5927	2767	1437	1149	842	1149	1308	3047	2125	1516	1516	988	251	3071	2881	814	471	1432	563	407	449	424	3	0	6	2
Brazil	BRA	Capture	Sharks, rays, skates, etc. nei	Shark, ray, skate	Atlantic, Southwest	Marine fish	C329	Shark and ray and skate	4.32353	572067	10000	8000	6000	16285	15608	19226	23717	21398	17390	21625	18765	21023	18374	18835	18800	18000	14750	12000	11000	10658	8446	10189	12596	13962	13730	11637	10795	9022	9907	11265	7549	7868	9832	10690	11523	9768	11601	10285	10948
Brazil	BRA	Capture	Shortfin mako	Shortfin mako	Atlantic, Southwest	Marine fish	Isurus oxyrinchus Rafinesque, 1810	Shortfin mako	4.5	5746	0	0	0	0	0	0	0	0	0	0	0	0	0	0	0	0	100	100	0	0	83	190	0	27	219	410	226	285	239	426	210	157	205	99	128	192	196	276	268
Brazil	BRA	Capture	Shorthead drum	Shorthead drum	Atlantic, Southwest	Marine fish	Larimus breviceps Cuvier, 1830	Shorthead drum	3.5	3913	0	0	0	0	0	0	0	0	0	0	0	0	0	0	0	0	0	0	0	0	0	0	0	0	0	0	178	206	159	207	218	254	221	244	231	215	234	202	244
Brazil	BRA	Capture	Argentine red shrimp	Shrimp	Atlantic, Southwest	Crustacean	Crustacean	Crustacean	2.5	8010	0	0	0	0	0	0	0	0	0	0	0	0	0	0	0	0	0	0	0	0	0	0	0	0	0	0	0	0	0	0	0	0	0	0	0	943	1037	936	944
Brazil	BRA	Capture	Argentine stiletto shrimp	Shrimp	Atlantic, Southwest	Crustacean	Crustacean	Crustacean	2.5	26732	0	0	0	0	0	0	0	0	0	0	0	0	0	0	0	0	0	0	0	0	0	0	0	0	0	0	0	0	0	0	0	0	0	0	0	3110	3420	3087	3115
Brazil	BRA	Capture	Penaeus shrimps nei	Shrimp	Atlantic, Southwest	Crustacean	Crustacean	Crustacean	2.5	911095	25956	36084	37165	61361	27793	23653	33071	31829	38009	47294	38011	32650	30983	31288	33734	32013	30896	25320	25380	27132	15007	14506	13998	12550	16509	10841	10584	17456	13964	13319	12137	12244	12342	13612	12861	4615	5075	4581	4622
Brazil	BRA	Capture	Redspotted shrimp	Shrimp	Atlantic, Southwest	Crustacean	Crustacean	Crustacean	2.5	333416	1360	1613	2681	3219	5571	6984	5382	6083	8570	8006	7137	10039	5788	5337	9065	3640	6163	6150	6160	6565	8743	10758	7796	9092	10728	5029	6730	5175	6355	9390	12382	8238	9829	10841	10237	10108	11115	10033	10124
Brazil	BRA	Capture	Southern white shrimp	Shrimp	Atlantic, Southwest	Crustacean	Crustacean	Crustacean	2.5	34304	0	0	0	0	0	0	0	0	0	0	0	0	0	0	0	0	0	0	0	0	0	0	0	0	0	0	0	0	0	0	0	0	0	0	0	4024	4425	3994	4031
Brazil	BRA	Capture	Silky shark	Silky shark	Atlantic, Southwest	Marine fish	Carcharhinus falciformis (Müller & Henle, 1839)	Silky shark	4.5	1923	0	0	0	0	0	0	0	0	0	0	0	0	0	0	0	0	0	0	0	0	502	279	0	70	80	0	328	307	286	20	0	0	0	0	0	0	21	14	16
Brazil	BRA	Capture	Silvery John dory	Silvery John dory	Atlantic, Southwest	Marine fish	Zenopsis conchifer (Lowe, 1852)	Silvery John dory	4.5	562	0	0	0	0	0	0	0	0	0	0	0	0	0	0	0	0	0	0	0	0	0	0	0	0	0	0	0	0	0	0	0	0	46	51	48	45	49	42	51
Brazil	BRA	Capture	Skipjack tuna	Skipjack tuna	Atlantic, Southwest	Marine fish	Katsuwonus pelamis (Linnaeus, 1758)	Skipjack tuna	4.4	833768	83	190	635	2065	6334	13913	18322	15945	13567	25096	23155	16286	17316	20750	20130	20548	18535	17771	20588	16560	22528	26564	23789	23188	25164	24146	18339	20416	23037	26388	23269	24191	20845	23307	20590	30571	30820	32229	24826
Brazil	BRA	Capture	Skipjack tuna	Skipjack tuna	Atlantic, Western Central	Marine fish	Katsuwonus pelamis (Linnaeus, 1758)	Skipjack tuna	4.4	12894	0	0	0	0	0	0	0	0	0	0	0	0	0	0	0	0	0	0	0	0	0	0	0	0	0	0	0	0	0	0	0	0	0	0	0	0	43	209	369
Brazil	BRA	Capture	Smooth weakfish	Smooth weakfish	Atlantic, Southwest	Marine fish	Cynoscion leiarchus (Cuvier, 1830)	Smooth weakfish	3.1	16358	0	0	0	0	0	0	0	0	0	0	0	0	0	0	0	0	0	0	0	0	0	0	0	0	0	0	974	884	694	1002	1080	692	910	1003	948	882	960	829	1000
Brazil	BRA	Capture	Snappers, jobfishes nei	Snapper, jobfish	Atlantic, Southwest	Marine fish	C248	Snapper and jobfish	4	161093	0	0	0	0	1846	4272	3314	2230	621	581	0	0	0	0	0	0	0	0	0	4550	3690	4488	4603	5292	4070	4153	3531	5340	5303	5339	6539	7875	6861	7567	7146	6650	7237	6246	7539
Brazil	BRA	Capture	Snooks(=Robalos) nei	Snook	Atlantic, Southwest	Marine fish	C254	Snook	4.2	132554	2960	2976	2584	2330	2429	2549	2385	2348	2394	2360	2658	2582	2256	2313	2300	2351	2310	2310	2320	1820	1686	1866	2996	3602	4366	3469	3311	5072	4577	3442	3318	3947	3499	3859	3645	3392	3691	3186	3845
Brazil	BRA	Capture	Sorubims nei	Sorubim	America, South - Inland waters	Freshwater fish	C260	Sorubim	4.46667	72498	0	0	0	0	0	0	0	0	0	0	0	0	0	0	0	0	0	0	0	0	0	0	0	0	0	0	0	0	0	0	0	0	0	0	0	8193	8257	8327	8221
Brazil	BRA	Capture	S.Am. freshwater stingrays nei	South American freshwater stingray	America, South - Inland waters	Freshwater fish	Potamotrygon motoro (Müller & Henle, 1841)	South American freshwater stingray	3.2	6568	0	0	0	0	0	0	0	0	0	0	0	0	0	0	0	0	0	0	0	0	0	0	0	0	0	0	0	0	0	0	0	0	0	0	0	743	749	755	746
Brazil	BRA	Capture	South American silver croaker	South American silver croaker	America, South - Inland waters	Freshwater fish	Plagioscion squamosissimus (Heckel, 1840)	South American silver croaker	4.4	306620	0	0	0	0	0	0	0	0	0	0	0	0	0	0	0	0	0	0	0	0	2864	5841	8701	8801	10335	10326	13611	10142	12270	12792	12244	12030	13132	12037	0	18372	18515	18672	18435
Brazil	BRA	Capture	Southern bluefin tuna	Southern bluefin tuna	Atlantic, Southwest	Marine fish	Thunnus maccoyii (Castelnau, 1872)	Southern bluefin tuna	3.9	765	0	0	0	0	0	0	0	0	0	0	0	0	0	0	0	0	0	0	0	0	0	0	0	0	0	0	0	0	0	0	0	0	0	0	0	0	2	632	61
Brazil	BRA	Capture	Kingcroakers nei	Southern kingcroaker	Atlantic, Southwest	Marine fish	Menticirrhus americanus (Linnaeus, 1758)	Southern kingcroaker	3.5	45290	184	249	56	1	0	0	0	0	0	0	0	0	0	0	0	0	0	0	0	1330	1144	1303	1395	1058	1348	2055	2048	2037	1649	2175	2114	1948	1935	2134	2015	1875	2040	1761	2126
Brazil	BRA	Capture	Southern red snapper	Southern red snapper	Atlantic, Southwest	Marine fish	Lutjanus purpureus (Poey, 1866)	Southern red snapper	3.6	293467	12715	11205	13530	8069	5490	8937	9415	9458	10721	9872	9649	4026	3518	3607	3600	3680	3620	3610	3620	5816	5104	6085	5937	9790	6580	6209	6923	5912	5994	7793	6587	3694	5943	6555	6199	5769	6277	5418	6540
Brazil	BRA	Capture	Spotted sorubim	Spotted sorubim	America, South - Inland waters	Freshwater fish	Pseudoplatystoma corruscans (Spix & Agassiz, 1829)	Spotted sorubim	4.5	29860	0	0	0	0	0	0	0	0	0	0	0	0	0	0	0	0	0	0	0	0	0	0	0	0	0	0	0	0	0	0	0	0	2145	1966	8688	1927	1942	1958	1934
Brazil	BRA	Capture	Common squids nei	Squid	Atlantic, Southwest	Cephalopod	Cephalopod	Cephalopod	3	61168	848	556	598	892	838	802	606	600	691	885	2032	1547	1352	1386	1300	1329	1310	1310	1320	1317	950	1486	758	1696	1187	1201	4828	1418	2134	2252	1393	2160	1899	2095	1608	1462	1607	1451	1464
Brazil	BRA	Capture	Stripped weakfish	Striped weakfish	Atlantic, Southwest	Marine fish	Cynoscion striatus (Cuvier, 1829)	Striped weakfish	3.9	109127	0	0	0	0	0	0	0	0	0	0	0	0	0	0	0	0	0	0	0	0	0	0	0	0	0	0	5837	9066	6256	9253	5135	3050	5747	6339	6002	5586	6078	5246	6332
Brazil	BRA	Capture	Swordfish	Swordfish	Atlantic, Southwest	Marine fish	Xiphias gladius Linnaeus, 1758	Swordfish	4.5	101041	365	396	372	521	1582	655	1019	781	468	569	762	956	1162	1168	1696	1312	2609	2013	1571	1975	1892	4100	3847	4721	4697	4084	2910	2920	2999	3783	4429	4243	3412	3386	2927	3033	2833	2384	2892
Brazil	BRA	Capture	Tarpon	Tarpon	Atlantic, Southwest	Marine fish	Megalops atlanticus Valenciennes, 1847	Tarpon	4.5	49640	1402	1936	1597	1013	1869	1896	1838	1500	1674	1841	1828	1597	1396	1431	1400	1431	1410	1410	1410	1221	348	720	551	315	331	1169	1075	1067	1035	860	898	636	785	865	818	761	828	715	863
Brazil	BRA	Capture	Tilapias nei	Tilapia	America, South - Inland waters	Freshwater fish	C290	Tilapia	2.1	366936	1871	2540	2584	6318	9442	7897	6848	6571	7724	9875	10226	12331	10897	11153	11100	11348	9115	8400	7700	6234	7300	6927	7444	6616	7893	8146	8734	8238	8461	9164	9328	9978	10088	9247	9610	9062	9133	9210	9093
Brazil	BRA	Capture	Tilefishes nei	Tilefish	Atlantic, Southwest	Marine fish	C293	Tilefish	3.74	25436	76	181	102	255	168	212	239	447	657	437	685	384	335	344	340	348	340	340	340	812	1098	1000	786	524	547	755	638	639	614	790	782	924	766	845	798	742	808	697	841
Brazil	BRA	Capture	Triggerfishes, durgons nei	Triggerfish	Atlantic, Southwest	Marine fish	C302	Triggerfish	3.8	116507	0	0	0	0	0	0	0	0	0	0	0	0	0	0	0	0	0	0	0	0	0	0	0	0	5946	6594	12828	7970	6590	6349	5494	3787	5026	5543	5240	4876	5306	4580	5528
Brazil	BRA	Capture	Tripletail	Tripletail	Atlantic, Southwest	Marine fish	Lobotes surinamensis (Bloch, 1790)	Tripletail	4	336	0	0	0	0	0	0	0	0	0	0	0	0	0	0	0	0	0	0	0	0	0	0	0	0	0	0	14	16	24	21	21	14	18	20	19	18	19	17	20
Brazil	BRA	Capture	Tuna-like fishes nei	Tuna, bonito	Atlantic, Southwest	Marine fish	C311	Tuna and bonito	4.44545	16042	33	338	679	415	647	48	714	400	31	3	10	335	53	6	11	6	173	287	140	58	0	446	258	570	151	5	467	2259	358	60	0	22	526	23	439	1981	1728	0	264
Brazil	BRA	Capture	Wahoo	Wahoo	Atlantic, Southwest	Marine fish	Acanthocybium solandri (Cuvier, 1832)	Wahoo	4.3	5303	5	73	47	66	56	62	48	52	74	21	17	133	58	92	52	64	71	33	26	1	16	58	41	0	0	0	0	403	519	449	113	76	77	70	19	357	213	477	153
Brazil	BRA	Capture	Whitemouth croaker	Whitemouth croaker	Atlantic, Southwest	Marine fish	Micropogonias furnieri (Desmarest, 1823)	Whitemouth croaker	3.1	1708816	58719	60424	75025	80440	42094	39518	38815	41792	42786	34039	34724	34285	29964	30716	30700	30000	28000	25000	23000	22024	23374	23311	27927	21926	28797	40306	43085	39789	37006	30572	45612	44374	41480	45750	43191	40195	43739	37749	45568
Brazil	BRA	Capture	Yellowfin river pellona	Yellowfin river pellona	America, South - Inland waters	Freshwater fish	Pellona flavipinnis (Valenciennes, 1837)	Yellowfin river pellona	4.5	3643	0	0	0	0	0	0	0	0	0	0	0	0	0	0	0	0	0	0	0	0	0	0	0	0	139	746	456	556	748	124	41	42	74	67	70	66	66	67	66
Brazil	BRA	Capture	Yellowfin tuna	Yellowfin tuna	Atlantic, Southwest	Marine fish	Thunnus albacares (Bonnaterre, 1788)	Yellowfin tuna	4.4	133166	715	1302	852	1353	1008	2084	1979	2844	2149	2955	1837	2266	2512	2533	1758	1838	4228	5131	4169	4021	2767	2705	2514	4127	6145	6238	6173	3502	6985	7223	3790	5468	2750	3314	3617	3615	1803	1437	391
Brazil	BRA	Capture	Yellowfin tuna	Yellowfin tuna	Atlantic, Western Central	Marine fish	Thunnus albacares (Bonnaterre, 1788)	Yellowfin tuna	4.4	86838	0	0	0	0	0	0	0	0	0	0	0	0	0	0	0	0	0	0	0	0	0	0	0	0	0	0	0	0	0	0	0	0	0	0	0	0	2836	5840	11254
Brazil	BRA	Capture	Yellowtail amberjack	Yellowtail amberjack	Atlantic, Southwest	Marine fish	Seriola lalandi Valenciennes, 1833	Yellowtail amberjack	4.2	15155	0	0	0	0	0	0	0	0	0	0	0	0	0	0	0	0	0	0	0	653	538	466	880	544	611	159	165	206	81	158	373	279	333	367	347	972	1058	913	1102
Brazil	BRA	Capture	Yellowtail snapper	Yellowtail snapper	Atlantic, Southwest	Marine fish	Ocyurus chrysurus (Bloch, 1791)	Yellowtail snapper	4	158947	2344	3956	4181	1360	1711	2677	1870	1821	2300	2784	3099	3195	2792	2862	2800	2862	2810	2800	2800	4766	4167	5000	3317	4541	4165	2002	2106	2656	2667	5376	5371	3717	4745	5233	4945	4602	5008	4322	5217
Brazil	BRA	Capture	Demersal percomorphs nei	Demersal percomorph	Atlantic, Southwest	Marine fish	Demersal percomorph	Demersal percomorph	4	154146	1768	2044	2584	4187	2692	3240	3267	4351	3767	5248	7034	8809	7699	7893	7800	7974	7840	7820	7830	5217	5697	9825	9828	12050	7644	38	0	0	0	0	0	0	0	0	0	0	0	0	0
Brazil	BRA	Aquaculture	[Anostomoides laticeps]	/	America, South - Inland waters	Freshwater fish	Anostomoides laticeps (Eigenmann, 1912)	/	2.3	40559	0	0	0	0	0	0	0	0	0	0	0	0	0	0	0	0	0	0	0	0	5	166	930	388	448	1554	1151	2451	3472	4158	3638	3491	5227	6252	7228	0	0	0	0
Brazil	BRA	Aquaculture	[Brycon amazonicus]	/	America, South - Inland waters	Freshwater fish	Brycon amazonicus (Spix & Agassiz, 1829)	/	3	51103.4	0	0	0	0	0	0	0	0	0	0	0	0	0	0	0	0	0	0	0	0	0	0	0	0	0	0	0	0	0	0	0	0	0	0	0	5146	5599	5486.25	10717.7
Brazil	BRA	Aquaculture	[Brycon cephalus]	/	America, South - Inland waters	Freshwater fish	Brycon cephalus (Günther, 1869)	/	2	16350	0	0	0	0	0	0	0	0	0	0	0	0	0	0	0	0	0	0	0	0	0	0	0	100	389	568	372	576	700	1517	1565	2900	2131	2550	2982	0	0	0	0
Brazil	BRA	Aquaculture	[Brycon hilarii]	/	America, South - Inland waters	Freshwater fish	Brycon hilarii (Valenciennes, 1850)	/	2	11980	0	0	0	0	0	0	0	0	0	0	0	0	0	0	0	0	0	0	0	0	0	31	152	1040	1378	1271	1350	509	532	534	832	842	976	1167	1366	0	0	0	0
Brazil	BRA	Aquaculture	[Brycon spp]	/	America, South - Inland waters	Freshwater fish	A1	/	2.33333	23858.2	0	0	0	0	0	0	0	0	0	0	0	0	0	0	0	0	0	0	0	0	0	0	0	0	0	0	0	0	0	0	0	0	0	0	0	754	934	855.2	255.46
Brazil	BRA	Aquaculture	[Cichla spp]	/	America, South - Inland waters	Freshwater fish	A3	/	4.3	2103.88	0	0	0	0	0	0	0	0	0	0	0	0	0	0	0	0	0	0	0	0	0	0	0	0	0	0	0	0	0	0	0	0	0	0	0	136	1415	147.27	63.9
Brazil	BRA	Aquaculture	[Hoplias spp]	/	America, South - Inland waters	Freshwater fish	A4	/	4.4	2506	0	0	0	0	0	0	0	0	0	0	0	0	0	0	0	0	0	0	0	0	0	0	0	0	0	0	0	0	0	0	0	0	0	0	0	1219	1287	0	0
Brazil	BRA	Aquaculture	Arapaima	Arapaima	America, South - Inland waters	Freshwater fish	Arapaima gigas (Schinz, 1822)	Arapaima	4.5	33447.4	0	0	0	0	0	0	0	0	0	0	0	0	0	0	0	0	0	0	0	0	0	0	0	0	0	0	0	0	0	9	10	6	7	8	10	2114	2581	2300.99	11762.9
Brazil	BRA	Aquaculture	Banded astyanax	Banded astyanax	America, South - Inland waters	Freshwater fish	Psalidodon fasciatus (Cuvier, 1819)	Banded astyanax	3	3182.2	0	0	0	0	0	0	0	0	0	0	0	0	0	0	0	0	0	0	0	0	0	0	0	0	0	0	0	0	0	0	0	0	0	0	0	233	254	139.04	270.91
Brazil	BRA	Aquaculture	Cachama	Cachama	America, South - Inland waters	Freshwater fish	Colossoma macropomum (Cuvier, 1816)	Cachama	2	1.30252e+06	0	0	0	0	0	0	0	0	0	0	0	0	0	0	0	0	0	0	0	2330	6400	5044	6088	6201	9776	18203	21709	20834	25272	25011	26662	30598	38833	46454	54313	79648	89376	88718.5	139633
Brazil	BRA	Aquaculture	Channel catfish	Channel catfish	America, South - Inland waters	Freshwater fish	Ictalurus punctatus (Rafinesque, 1818)	Channel catfish	4.2	25512	0	0	0	0	0	0	0	0	0	0	0	0	0	0	0	0	0	0	0	87	164	552	1396	1520	1867	2051	2233	1772	1502	1685	1391	1800	2492	2500	2500	0	0	0	0
Brazil	BRA	Aquaculture	Characins nei	Characin	America, South - Inland waters	Freshwater fish	Alestes dentex (Linnaeus, 1758)	Characin	2.9	347	0	0	0	0	0	0	0	0	0	0	0	0	0	0	0	0	0	0	0	99	248	0	0	0	0	0	0	0	0	0	0	0	0	0	0	0	0	0	0
Brazil	BRA	Aquaculture	Common carp	Common carp	America, South - Inland waters	Freshwater fish	Cyprinus carpio Linnaeus, 1758	Common carp	3.1	543548	0	0	0	0	0	0	0	0	0	0	0	0	0	0	0	0	0	0	0	16865	23900	35512	33518	49254	54566	54446	54963	50400	45170	42491	45832	36631	0	0	0	0	0	0	0
Brazil	BRA	Aquaculture	Cyprinids nei	Carp	America, South - Inland waters	Freshwater fish	A13	Carp	2.73333	277571	0	0	0	0	0	0	0	0	0	0	0	0	0	0	0	0	0	0	0	0	0	0	0	0	0	0	0	0	0	0	0	0	33500	30500	27500	24323	26174	18836.9	20886.1
Brazil	BRA	Aquaculture	Dorado	Dorado	America, South - Inland waters	Freshwater fish	Salminus brasiliensis (Cuvier, 1816)	Dorado	3.8	754.23	0	0	0	0	0	0	0	0	0	0	0	0	0	0	0	0	0	0	0	0	0	0	0	0	0	0	0	0	0	0	0	0	0	0	0	134	146	139.06	38.42
Brazil	BRA	Aquaculture	Freshwater fishes nei	Freshwater fish	America, South - Inland waters	Freshwater fish	Weighted mean	Freshwater fish	2.25068	361080	200	500	800	1300	3291	5282	7000	8500	10000	10000	10000	12000	14000	16000	18000	20000	26000	26500	27000	1644	7809	2596	7856	10997	12264	12568	7577	4526	5461	5824	5740	5222	7416	9060	10655	4023	2590	3169.96	2879.43
Brazil	BRA	Aquaculture	Freshwater siluroids nei	Channel catfish	America, South - Inland waters	Freshwater fish	Ictalurus punctatus (Rafinesque, 1818)	Channel catfish	4.2	20051	0	0	0	0	0	0	0	0	0	0	0	0	0	0	0	0	0	0	0	0	0	0	0	0	0	0	0	0	0	0	0	0	0	0	0	9491	10560	0	0
Brazil	BRA	Aquaculture	Giant river prawn	Prawn	America, South - Inland waters	Crustacean	Crustacean	Crustacean	2.5	14471	144	176	209	241	273	305	338	370	400	400	400	500	600	700	600	550	650	700	700	341	486	446	279	227	450	450	450	450	363	370	373	230	100	100	100	100	100	100	100
Brazil	BRA	Aquaculture	Marine fishes nei	Marine fish	Atlantic, Southwest	Marine fish	Weighted mean	Marine fish	4.29532	112	0	0	0	0	0	0	0	0	0	0	0	0	0	0	0	0	0	0	0	0	0	1	4	7	13	13	13	1	0	0	0	0	0	0	0	0	0	0	0
Brazil	BRA	Aquaculture	Nile tilapia	Nile tilapia	America, South - Inland waters	Freshwater fish	Oreochromis niloticus (Linnaeus, 1758)	Nile tilapia	2	3.08518e+06	0	0	0	0	0	0	0	0	0	0	0	0	0	0	0	0	0	0	0	12014	15700	16845	24062	27104	32459	35830	57031	64857	69078	67851	71253	95091	111145	132957	155451	166913	182297	169306	199948
Brazil	BRA	Aquaculture	North African catfish	North African catfish	America, South - Inland waters	Freshwater fish	Clarias gariepinus (Burchell, 1822)	North African catfish	3.8	13516	0	0	0	0	0	0	0	0	0	0	0	0	0	0	0	0	0	0	0	2263	2454	4066	603	441	478	309	465	284	245	224	362	302	420	300	300	0	0	0	0
Brazil	BRA	Aquaculture	Pacu	Pacu	America, South - Inland waters	Freshwater fish	Lithodoras dorsalis (Valenciennes, 1840)	Pacu	2	261218	0	0	0	0	0	0	0	0	0	0	0	0	0	0	0	0	0	0	0	3971	6155	7253	3664	4339	5045	5446	6232	9244	8946	9044	10625	12397	15189	18171	21245	11667	12673	13652.9	14553.1
Brazil	BRA	Aquaculture	Pirapatinga	Pirapatinga	America, South - Inland waters	Freshwater fish	Piaractus brachypomus (Cuvier, 1818)	Pirapatinga	2.5	31199.3	0	0	0	0	0	0	0	0	0	0	0	0	0	0	0	0	0	0	0	0	0	7	7	18	36	42	226	198	250	328	756	330	560	670	784	3100	3459	4765.9	4598.7
Brazil	BRA	Aquaculture	Prochilods nei	Prochilod	America, South - Inland waters	Freshwater fish	A27	Prochilod	2.15	38371	0	0	0	0	0	0	0	0	0	0	0	0	0	0	0	0	0	0	0	0	890	525	1062	1092	1363	964	1156	1881	2385	2413	2953	2721	3736	4469	5226	2609	2926	0	0
Brazil	BRA	Aquaculture	Rainbow trout	Rainbow trout	America, South - Inland waters	Freshwater fish	Oncorhynchus mykiss (Walbaum, 1792)	Rainbow trout	4.1	53640.2	0	0	0	0	0	0	0	0	0	0	0	0	0	0	0	600	800	800	800	762	1085	1160	791	1229	1447	1939	2238	2281	2220	2352	2976	2197	3663	4381	5123	1340	1298	957.02	1703.61
Brazil	BRA	Aquaculture	Sorubims nei	Spotted sorubim	America, South - Inland waters	Freshwater fish	Pseudoplatystoma corruscans (Spix & Agassiz, 1829)	Spotted sorubim	4.5	106038	0	0	0	0	0	0	0	0	0	0	0	0	0	0	0	0	0	0	0	0	0	0	0	0	0	0	0	0	0	0	0	0	0	0	0	0	0	15714.7	20437.2
Brazil	BRA	Aquaculture	South American catfish	South American catfish	America, South - Inland waters	Freshwater fish	Rhamdia quelen (Quoy & Gaimard, 1824)	South American catfish	3.9	17645	0	0	0	0	0	0	0	0	0	0	0	0	0	0	0	0	0	0	0	0	0	1047	904	1826	2546	2526	2528	655	547	577	548	667	911	1089	1274	0	0	0	0
Brazil	BRA	Aquaculture	Spotted sorubim	Spotted sorubim	America, South - Inland waters	Freshwater fish	Pseudoplatystoma corruscans (Spix & Agassiz, 1829)	Spotted sorubim	4.5	15779	0	0	0	0	0	0	0	0	0	0	0	0	0	0	0	0	0	0	0	102	982	130	455	550	130	693	439	822	1153	1246	1094	1593	1777	2126	2487	0	0	0	0
Brazil	BRA	Aquaculture	Streaked prochilod	Streaked prochilod	America, South - Inland waters	Freshwater fish	Prochilodus lineatus (Valenciennes, 1837)	Streaked prochilod	2.2	20003.4	0	0	0	0	0	0	0	0	0	0	0	0	0	0	0	0	0	0	0	0	0	0	0	0	0	0	0	0	0	0	0	0	0	0	0	0	0	2774.03	2403.13
Brazil	BRA	Aquaculture	Tambacu, hybrid	Pacu	America, South - Inland waters	Freshwater fish	Piaractus mesopotamicus (Holmberg, 1887)	Pacu	2	463615	0	0	0	0	0	0	0	0	0	0	0	0	0	0	0	0	0	0	0	0	2507	1593	6219	7224	8763	13226	15255	7916	10335	10875	10990	10854	15458	18492	21621	26779	29179	48363.4	32166.6
Brazil	BRA	Aquaculture	Tambatinga, hybrid	Pirapitinga	America, South - Inland waters	Freshwater fish	Piaractus brachypomus (Cuvier, 1818)	Pirapitinga	2.5	101900	0	0	0	0	0	0	0	0	0	0	0	0	0	0	0	0	0	0	0	0	0	0	0	0	0	0	375	1844	2353	2495	2821	2028	3514	4204	4916	7500	8200	12100	8100
Brazil	BRA	Aquaculture	Trahira	Trahira	America, South - Inland waters	Freshwater fish	Hoplias malabaricus (Bloch, 1794)	Trahira	4.5	7777.12	0	0	0	0	0	0	0	0	0	0	0	0	0	0	0	0	0	0	0	0	0	0	0	0	0	0	169	139	117	115	115	140	190	227	266	0	0	1155.49	1124.31
Brazil	BRA	Aquaculture	Whiteleg shrimp	Shrimp	Atlantic, Southwest	Crustacean	Crustacean	Crustacean	2.5	1.27413e+06	26	35	48	65	87	115	151	196	200	350	450	500	800	1300	1700	2000	2100	2100	2100	2007	3364	3613	7254	16054	25388	40000	60253	90190	75904	63134	65000	65000	70251	65188	69422	69266	75000	64678	65027.6
Brunei Darussalam	BRN	Capture	Carangids nei	Amberjack, jack, trevally, scad, pompano	Pacific, Western Central	Marine fish	C25	Amberjack and jack and trevally and scad and pompano	3.98333	2809.49	0	0	0	0	0	0	0	0	0	0	0	0	0	0	0	0	0	0	0	0	0	0	0	0	0	0	0	0	0	0	0	0	0	0	0	0	0	0	0
Brunei Darussalam	BRN	Capture	Stolephorus anchovies nei	Anchovy	Pacific, Western Central	Marine fish	C273	Anchovy	3.275	109	0	0	0	0	0	0	0	0	0	0	0	0	0	0	0	0	0	0	0	0	0	0	0	0	0	0	0	0	0	0	0	0	0	0	0	0	0	0	0
Brunei Darussalam	BRN	Capture	Barracudas nei	Barracuda	Pacific, Western Central	Marine fish	C12	Barracuda	4.5	286.63	0	0	0	0	0	0	0	0	0	0	0	0	0	0	0	0	0	0	0	0	0	0	0	0	0	0	0	0	0	0	0	0	0	0	0	0	0	0	0
Brunei Darussalam	BRN	Capture	Bigeyes nei	Bigeye	Pacific, Western Central	Marine fish	C16	Bigeyes nei	3.76667	209.94	0	0	0	0	0	0	0	0	0	0	0	0	0	0	0	0	0	0	0	0	0	0	0	0	0	0	0	0	0	0	0	0	0	0	0	0	0	0	0
Brunei Darussalam	BRN	Capture	Bigeye scad	Bigeye scad	Pacific, Western Central	Marine fish	Selar crumenophthalmus (Bloch, 1793)	Bigeye scad	3.8	155.55	0	0	0	0	0	0	0	0	0	0	0	0	0	0	0	0	0	0	0	0	0	0	0	0	0	0	0	0	0	0	0	0	0	0	0	0	0	0	0
Brunei Darussalam	BRN	Capture	Frigate and bullet tunas	Bullet tuna	Pacific, Western Central	Marine fish	Auxis rochei (Risso, 1810)	Bullet tuna	4.4	1074.64	0	0	0	0	0	0	0	0	0	0	0	0	0	0	0	0	0	0	0	0	0	0	0	0	0	0	0	0	0	0	0	0	0	0	0	0	0	0	0
Brunei Darussalam	BRN	Capture	Chacunda gizzard shad	Chacunda gizzard shad	Pacific, Western Central	Marine fish	Anodontostoma chacunda (Hamilton, 1822)	Chacunda gizzard shad	2.8	1681	0	0	0	0	0	0	0	0	0	0	0	0	0	0	0	0	0	0	0	0	0	0	0	0	0	0	0	0	0	0	0	0	0	0	0	0	0	0	0
Brunei Darussalam	BRN	Capture	Pike-congers nei	Common pike conger	Pacific, Western Central	Marine fish	Muraenesox bagio (Hamilton, 1822)	Common pike conger	4	404	0	0	0	0	0	0	0	0	0	0	0	0	0	0	0	0	0	0	0	0	0	0	0	0	0	0	0	0	0	0	404	0	0	0	0	0	0	0	0
Brunei Darussalam	BRN	Capture	Ponyfishes(=Slipmouths)	Common ponyfish	Pacific, Western Central	Marine fish	Leiognathus equula (Forsskål, 1775)	Common ponyfish	3	1295.84	0	0	0	0	0	0	0	0	0	0	0	0	0	0	0	0	0	0	0	0	0	0	0	0	0	0	0	0	0	0	0	0	0	0	0	0	0	0	0
Brunei Darussalam	BRN	Capture	Croakers, drums nei	Croaker, drum	Pacific, Western Central	Marine fish	C43	Croaker and drum	3.84615	151.58	0	0	0	0	0	0	0	0	0	0	0	0	0	0	0	0	0	0	0	0	0	0	0	0	0	0	0	0	0	0	0	0	0	0	0	0	0	0	0
Brunei Darussalam	BRN	Capture	Marine crustaceans nei	Crustacean	Pacific, Western Central	Crustacean	Crustacean	Crustacean	2.5	4012	0	0	0	0	61	51	42	54	51	91	141	141	67	80	57	44	79	39	68	18	281	78	65	44	78	368	485	228	175	149	167	191	131	106	36	44	53	62	187
Brunei Darussalam	BRN	Capture	Wolf-herrings nei	Dorab wolf-herring	Pacific, Western Central	Marine fish	Chirocentrus dorab (Forsskål, 1775)	Dorab wolf-herring	4.4	172.54	0	0	0	0	0	0	0	0	0	0	0	0	0	0	0	0	0	0	0	0	0	0	0	0	0	0	0	0	0	0	0	0	0	0	0	0	0	0	0
Brunei Darussalam	BRN	Capture	Emperors(=Scavengers) nei	Emperor	Pacific, Western Central	Marine fish	C59	Emperor	3.8	194.25	0	0	0	0	0	0	0	0	0	0	0	0	0	0	0	0	0	0	0	0	0	0	0	0	0	0	0	0	0	0	0	0	0	0	0	0	0	0	0
Brunei Darussalam	BRN	Capture	False trevally	False trevally	Pacific, Western Central	Marine fish	Lactarius lactarius (Bloch & Schneider, 1801)	False trevally	4.2	346.97	0	0	0	0	0	0	0	0	0	0	0	0	0	0	0	0	0	0	0	0	0	0	0	0	0	0	0	0	0	0	0	0	0	0	0	0	0	0	0
Brunei Darussalam	BRN	Capture	Fusiliers nei	Fusilier	Pacific, Western Central	Marine fish	C77	Fusilier	3.4	217.07	0	0	0	0	0	0	0	0	0	0	0	0	0	0	0	0	0	0	0	0	0	0	0	0	0	0	0	0	0	0	0	0	0	0	0	0	0	0	0
Brunei Darussalam	BRN	Capture	Groupers nei	Grouper	Pacific, Western Central	Marine fish	C92	Grouper	4.00571	1324.11	0	0	0	0	0	0	0	0	0	0	0	0	0	0	0	0	0	0	0	0	0	0	0	0	0	0	0	0	0	0	0	0	0	0	0	0	0	0	0
Brunei Darussalam	BRN	Capture	Grunts, sweetlips nei	Grunt, sweetlips	Pacific, Western Central	Marine fish	C100	Grunt and sweetlips	3.8	212.53	0	0	0	0	0	0	0	0	0	0	0	0	0	0	0	0	0	0	0	0	0	0	0	0	0	0	0	0	0	0	0	0	0	0	0	0	0	0	0
Brunei Darussalam	BRN	Capture	Indian mackerel	Indian mackerel	Pacific, Western Central	Marine fish	Rastrelliger kanagurta (Cuvier, 1816)	Indian mackerel	3.2	194	0	0	0	0	0	0	0	0	0	0	0	0	0	0	0	0	0	0	0	0	0	0	0	0	0	0	0	0	0	0	194	0	0	0	0	0	0	0	0
Brunei Darussalam	BRN	Capture	Indian mackerels nei	Indian mackerel	Pacific, Western Central	Marine fish	Rastrelliger kanagurta (Cuvier, 1816)	Indian mackerel	3.2	4139.1	0	0	0	0	0	0	0	0	0	0	0	0	0	0	0	0	0	0	0	0	0	0	0	0	0	0	0	0	0	0	0	0	0	0	0	0	0	0	0
Brunei Darussalam	BRN	Capture	Jacks, crevalles nei	Jack	Pacific, Western Central	Marine fish	C129	Jack	4.16	424.85	0	0	0	0	0	0	0	0	0	0	0	0	0	0	0	0	0	0	0	0	0	0	0	0	0	0	0	0	0	0	0	0	0	0	0	0	0	0	0
Brunei Darussalam	BRN	Capture	Largehead hairtail	Largehead hairtail	Pacific, Western Central	Marine fish	Trichiurus lepturus Linnaeus, 1758	Largehead hairtail	4.4	176.74	0	0	0	0	0	0	0	0	0	0	0	0	0	0	0	0	0	0	0	0	0	0	0	0	0	0	0	0	0	0	0	0	0	0	0	0	0	0	0
Brunei Darussalam	BRN	Capture	Lizardfishes nei	Lizardfish	Pacific, Western Central	Marine fish	C140	Lizardfish	4.20769	187	0	0	0	0	0	0	0	0	0	0	0	0	0	0	0	0	0	0	0	0	0	0	0	0	0	0	0	0	0	0	0	0	0	0	0	0	0	0	0
Brunei Darussalam	BRN	Capture	Marine fishes nei	Marine fish	Pacific, Western Central	Marine fish	Weighted mean	Marine fish	3.79772	109132	974	1537	2138	2251	1560	1763	1631	2391	2332	2978	3127	3247	1499	1663	1680	1100	1231	1330	3131	4389	5142	4405	4930	3081	2356	1186	1528	1421	1680	2513	894	2286	2173	1801	2233	2025	4380	2671	2906
Brunei Darussalam	BRN	Capture	Narrow-barred Spanish mackerel	Narrow-barred Spanish mackerel	Pacific, Western Central	Marine fish	Scomberomorus commerson (Lacepède, 1800)	Narrow-barred Spanish mackerel	4.5	578.9	0	0	0	0	0	0	0	0	0	0	0	0	0	0	0	0	0	0	0	0	0	0	0	0	0	0	0	0	0	0	0	0	0	0	0	0	0	0	0
Brunei Darussalam	BRN	Capture	Seerfishes nei	Narrow-barred Spanish mackerel	Pacific, Western Central	Marine fish	Scomberomorus commerson (Lacepède, 1800)	Narrow-barred Spanish mackerel	4.5	1055	0	0	0	0	0	0	0	0	0	0	0	0	0	0	0	0	0	0	0	0	0	0	0	0	0	0	0	0	0	0	0	0	0	0	0	0	0	0	0
Brunei Darussalam	BRN	Capture	Giant river prawn	Prawn	Asia - Inland waters	Crustacean	Crustacean	Crustacean	2.5	648	0	0	0	0	17	31	29	20	73	89	65	31	19	44	20	20	15	11	3	5	14	17	35	26	22	16	13	5	8	0	0	0	0	0	0	0	0	0	0
Brunei Darussalam	BRN	Capture	Queenfishes	Queenfish	Pacific, Western Central	Marine fish	C198	Queenfish	4.25	111	0	0	0	0	0	0	0	0	0	0	0	0	0	0	0	0	0	0	0	0	0	0	0	0	0	0	0	0	0	0	0	0	0	0	0	0	0	0	0
Brunei Darussalam	BRN	Capture	Rainbow sardine	Rainbow sardine	Pacific, Western Central	Marine fish	Dussumieria acuta Valenciennes, 1847	Rainbow sardine	3.4	362.42	0	0	0	0	0	0	0	0	0	0	0	0	0	0	0	0	0	0	0	0	0	0	0	0	0	0	0	0	0	0	0	0	0	0	0	0	0	0	0
Brunei Darussalam	BRN	Capture	Rays, stingrays, mantas nei	Ray, stingray, manta	Pacific, Western Central	Marine fish	C204	Ray and stingray and manta	3.55	256.42	0	0	0	0	0	0	0	0	0	0	0	0	0	0	0	0	0	0	0	0	0	0	0	0	0	0	0	0	0	0	0	0	0	0	0	0	0	0	0
Brunei Darussalam	BRN	Capture	Sardinellas nei	Sardine	Pacific, Western Central	Marine fish	C211	Sardine	2.90769	411	0	0	0	0	0	0	0	0	0	0	0	0	0	0	0	0	0	0	0	0	0	0	0	0	0	0	0	0	0	0	401	0	0	0	0	0	0	0	0
Brunei Darussalam	BRN	Capture	Clupeoids nei	Sardine, Pilchard	Pacific, Western Central	Marine fish	C34	Sardine and Pilchard	2.78571	566	0	0	0	0	0	0	0	0	0	0	0	0	0	0	0	0	0	0	0	0	0	0	0	0	0	0	0	0	0	0	0	0	0	0	0	0	0	0	0
Brunei Darussalam	BRN	Capture	Scads nei	Scad	Pacific, Western Central	Marine fish	C216	Scad	3.61667	1308.68	0	0	0	0	0	0	0	0	0	0	0	0	0	0	0	0	0	0	0	0	0	0	0	0	0	0	0	0	0	0	188	0	0	0	0	0	0	0	0
Brunei Darussalam	BRN	Capture	Sea catfishes nei	Sea catfish	Pacific, Western Central	Marine fish	C226	Sea catfish	3.67143	430.95	0	0	0	0	0	0	0	0	0	0	0	0	0	0	0	0	0	0	0	0	0	0	0	0	0	0	0	0	0	0	0	0	0	0	0	0	0	0	0
Brunei Darussalam	BRN	Capture	Short mackerel	Short mackerel	Pacific, Western Central	Marine fish	Rastrelliger brachysoma (Bleeker, 1851)	Short mackerel	2.7	224.38	0	0	0	0	0	0	0	0	0	0	0	0	0	0	0	0	0	0	0	0	0	0	0	0	0	0	0	0	0	0	0	0	0	0	0	0	0	0	0
Brunei Darussalam	BRN	Capture	Metapenaeus shrimps nei	Shrimp	Pacific, Western Central	Crustacean	Crustacean	Crustacean	2.5	1023.75	0	0	0	0	0	0	0	0	0	0	0	0	0	0	0	0	0	0	0	0	0	0	0	0	0	0	0	0	0	0	0	0	0	0	0	0	0	0	0
Brunei Darussalam	BRN	Capture	Natantian decapods nei	Shrimp	Pacific, Western Central	Crustacean	Crustacean	Crustacean	2.5	10915	587	573	483	458	499	428	560	496	937	793	618	400	357	432	499	392	348	299	1208	272	275	0	0	0	0	0	0	0	0	0	0	0	0	0	0	0	0	0	0
Brunei Darussalam	BRN	Capture	Penaeus shrimps nei	Shrimp	Pacific, Western Central	Crustacean	Crustacean	Crustacean	2.5	5613.72	0	0	0	0	0	0	0	0	0	0	0	0	0	0	0	0	0	0	0	0	0	0	0	0	0	0	0	0	0	0	0	0	0	0	0	0	0	0	0
Brunei Darussalam	BRN	Capture	Sergestid shrimps nei	Shrimp	Pacific, Western Central	Crustacean	Crustacean	Crustacean	2.5	456.28	0	0	0	0	0	0	0	0	0	0	0	0	0	0	0	0	0	0	0	0	0	0	0	0	0	0	0	0	0	0	0	0	0	0	0	0	0	0	0
Brunei Darussalam	BRN	Capture	Skipjack tuna	Skipjack tuna	Pacific, Western Central	Marine fish	Katsuwonus pelamis (Linnaeus, 1758)	Skipjack tuna	4.4	4423.44	0	0	0	0	0	0	0	0	0	0	0	0	0	0	0	0	0	0	0	0	0	0	0	0	0	0	0	0	0	0	0	0	0	0	0	0	0	0	0
Brunei Darussalam	BRN	Capture	Snappers, jobfishes nei	Snapper, jobfish	Pacific, Western Central	Marine fish	C251	Snapper and jobfish	3.96818	2324.97	0	0	0	0	0	0	0	0	0	0	0	0	0	0	0	0	0	0	0	0	0	0	0	0	0	0	0	0	0	0	0	0	0	0	0	0	0	0	0
Brunei Darussalam	BRN	Capture	Spinefeet(=Rabbitfishes) nei	Spinefeet(=Rabbitfish)	Pacific, Western Central	Marine fish	C263	Spinefeet	2.25	161.86	0	0	0	0	0	0	0	0	0	0	0	0	0	0	0	0	0	0	0	0	0	0	0	0	0	0	0	0	0	0	0	0	0	0	0	0	0	0	0
Brunei Darussalam	BRN	Capture	Spotted sardinella	Spotted sardinella	Pacific, Western Central	Marine fish	Amblygaster sirm (Walbaum, 1792)	Spotted sardinella	2.9	103.73	0	0	0	0	0	0	0	0	0	0	0	0	0	0	0	0	0	0	0	0	0	0	0	0	0	0	0	0	0	0	0	0	0	0	0	0	0	0	0
Brunei Darussalam	BRN	Capture	Cuttlefish, bobtail squids nei	Squid	Pacific, Western Central	Cephalopod	Cephalopod	Cephalopod	3	295.26	0	0	0	0	0	0	0	0	0	0	0	0	0	0	0	0	0	0	0	0	0	0	0	0	0	0	0	0	0	0	0	0	0	0	0	0	0	0	0
Brunei Darussalam	BRN	Capture	Various squids nei	Squid	Pacific, Western Central	Cephalopod	Cephalopod	Cephalopod	3	216	0	0	0	0	0	0	0	0	0	0	0	0	0	0	0	0	0	0	0	0	0	0	0	0	0	0	0	0	0	0	0	0	0	0	0	0	0	0	0
Brunei Darussalam	BRN	Capture	Threadfin breams nei	Threadfin bream	Pacific, Western Central	Marine fish	C282	Threadfin bream	3.8	1174.62	0	0	0	0	0	0	0	0	0	0	0	0	0	0	0	0	0	0	0	0	0	0	0	0	0	0	0	0	0	0	0	0	0	0	0	0	0	0	0
Brunei Darussalam	BRN	Capture	Goatfishes	Yellowfin goatfish	Pacific, Western Central	Marine fish	Mulloidichthys vanicolensis (Valenciennes, 1831)	Yellowfin goatfish	3.6	281.28	0	0	0	0	0	0	0	0	0	0	0	0	0	0	0	0	0	0	0	0	0	0	0	0	0	0	0	0	0	0	0	0	0	0	0	0	0	0	0
Brunei Darussalam	BRN	Capture	Yellowfin tuna	Yellowfin tuna	Pacific, Western Central	Marine fish	Thunnus albacares (Bonnaterre, 1788)	Yellowfin tuna	4.4	1588.45	0	0	0	0	0	0	0	0	0	0	0	0	0	0	0	0	0	0	0	0	0	0	0	0	0	0	0	0	0	0	0	0	0	0	0	0	0	0	0
Brunei Darussalam	BRN	Capture	Freshwater fishes nei	Freshwater fish	Asia - Inland waters	Freshwater fish	Weighted mean	Freshwater fish	2.82125	1260	83	83	83	83	86	91	89	86	11	6	96	87	87	84	84	85	10	14	1	2	1	0	0	0	1	3	1	0	3	0	0	0	0	0	0	0	0	0	0
Brunei Darussalam	BRN	Aquaculture	Barramundi(=Giant seaperch)	Barramundi	Pacific, Western Central	Marine fish	Lates calcarifer (Bloch, 1790)	Barramundi	3.8	1432.71	0	0	0	0	0	0	0	0	0	0	0	1	1	0	3	0	8	26	51	74	72	69	74	41	6	0	23	20	43	30	36	31	28	30	33	30	20	41.56	75.27
Brunei Darussalam	BRN	Aquaculture	Blue shrimp	Shrimp	Pacific, Western Central	Crustacean	Crustacean	Crustacean	2.5	8259.85	0	0	0	0	0	0	0	0	0	0	0	0	0	0	0	0	0	0	0	0	0	0	0	0	0	0	0	0	432	310	327	491	390	320	325	320	300	451.24	591.24
Brunei Darussalam	BRN	Aquaculture	Common carp	Common carp	Asia - Inland waters	Freshwater fish	Cyprinus carpio Linnaeus, 1758	Common carp	3.1	197	0	0	0	0	0	0	0	0	0	0	0	1	1	1	1	1	1	1	11	9	10	9	9	11	5	0	32	33	27	14	10	5	0	1	4	0	0	0	0
Brunei Darussalam	BRN	Aquaculture	Freshwater fishes nei	Freshwater fish	Asia - Inland waters	Freshwater fish	Weighted mean	Freshwater fish	2.44699	185	0	0	0	0	0	0	0	0	0	0	0	0	0	1	1	0	0	0	1	0	0	1	0	36	0	29	5	7	27	0	0	0	0	0	0	20	14	14	0
Brunei Darussalam	BRN	Aquaculture	Giant tiger prawn	Prawn	Pacific, Western Central	Crustacean	Crustacean	Crustacean	2.5	897.88	0	0	0	0	0	0	0	0	0	0	0	0	0	0	0	0	2	4	5	10	27	57	69	45	35	31	29	32	61	84	86	83	48	40	25	30	30	5.2	0
Brunei Darussalam	BRN	Aquaculture	Groupers nei	Grouper	Pacific, Western Central	Marine fish	A15	Grouper	4.05455	475.18	0	0	0	0	0	0	0	0	0	0	0	0	0	0	0	0	0	0	0	0	0	0	0	0	0	0	0	0	0	0	0	0	0	0	0	0	0	0	0
Brunei Darussalam	BRN	Aquaculture	Jacks, crevalles nei	Jack	Pacific, Western Central	Marine fish	A18	Jack	4.18	274.53	0	0	0	0	0	0	0	0	0	0	0	0	0	0	0	0	0	1	0	0	0	0	0	0	33	0	8	8	30	0	0	0	0	0	29.15	30	25	16.03	5.84
Brunei Darussalam	BRN	Aquaculture	Marine fishes nei	Marine fish	Pacific, Western Central	Marine fish	Weighted mean	Marine fish	3.9201	476	0	0	0	0	0	0	0	0	0	0	0	0	0	0	0	0	0	2	0	0	0	0	0	0	0	30	4	5	0	0	0	0	0	30	30	50	70	0	0
Brunei Darussalam	BRN	Aquaculture	Nile tilapia	Nile tilapia	Asia - Inland waters	Freshwater fish	Oreochromis niloticus (Linnaeus, 1758)	Nile tilapia	2	287.8	0	0	0	0	0	0	0	0	0	0	0	0	0	0	1	0	3	0	3	10	10	21	20	25	14	0	52	50	27	2	3	2	4	4	5	0	5	2.8	2.74
Brunei Darussalam	BRN	Aquaculture	Orange-spotted grouper	Orange-spotted grouper	Pacific, Western Central	Marine fish	Epinephelus coioides (Hamilton, 1822)	Orange-spotted grouper	4	126.54	0	0	0	0	0	0	0	0	0	0	0	0	0	0	0	0	0	0	0	0	0	0	0	0	0	0	0	0	5	4	3	2	3	5	5	5	50	3.51	28.13
Brunei Darussalam	BRN	Aquaculture	Snappers nei	Snapper	Pacific, Western Central	Marine fish	A34	Snapper	4.1125	273.99	0	0	0	0	0	0	0	0	0	0	0	0	0	0	0	0	0	2	0	0	0	0	0	36	20	0	4	5	7	0	0	0	0	0	35.8	40	30	11.53	4.31
Brunei Darussalam	BRN	Aquaculture	Snubnose pompano	Snubnose pompano	Pacific, Western Central	Marine fish	Trachinotus blochii (Lacepède, 1801)	Snubnose pompano	3.7	118.11	0	0	0	0	0	0	0	0	0	0	0	0	0	0	0	0	0	0	0	0	0	0	0	0	0	0	0	0	0	0	0	0	0	0	0	0	0	0	0
Bulgaria	BGR	Capture	African sicklefish	African sicklefish	Atlantic, Eastern Central	Marine fish	Drepane africana Osório, 1892	African sicklefish	3.1	254	0	0	0	0	0	0	0	0	0	0	0	0	0	0	0	0	0	0	0	0	0	0	0	0	197	57	0	0	0	0	0	0	0	0	0	0	0	0	0
Bulgaria	BGR	Capture	Alewife	Alewife	Atlantic, Northwest	Marine fish	Alosa pseudoharengus (Wilson, 1811)	Alewife	3.4	256	256	0	0	0	0	0	0	0	0	0	0	0	0	0	0	0	0	0	0	0	0	0	0	0	0	0	0	0	0	0	0	0	0	0	0	0	0	0	0
Bulgaria	BGR	Capture	Amberjacks nei	Amberjack	Atlantic, Southwest	Marine fish	C6	Amberjack	4.35	104	0	0	0	0	0	0	0	0	0	0	0	51	53	0	0	0	0	0	0	0	0	0	0	0	0	0	0	0	0	0	0	0	0	0	0	0	0	0	0
Bulgaria	BGR	Capture	Carangids nei	Amberjack, jack, trevally, scad, pompano	Atlantic, Eastern Central	Marine fish	C23	Amberjack and jack and trevally and scad and pompano	3.9	100	0	0	0	0	0	0	0	0	0	0	0	0	0	0	0	0	0	0	0	0	0	0	0	0	76	24	0	0	0	0	0	0	0	0	0	0	0	0	0
Bulgaria	BGR	Capture	Argentine hake	Argentine hake	Atlantic, Southwest	Marine fish	Merluccius hubbsi Marini, 1933	Argentine hake	4.2	1771	0	858	0	0	0	0	0	0	25	166	21	430	132	112	15	0	12	0	0	0	0	0	0	0	0	0	0	0	0	0	0	0	0	0	0	0	0	0	0
Bulgaria	BGR	Capture	Asp	Asp	Europe - Inland waters	Freshwater fish	Leuciscus aspius (Linnaeus, 1758)	Asp	4.5	131	0	0	0	0	0	0	0	0	0	0	0	0	0	0	0	0	0	0	0	3	4	5	7	8	9	7	1	3	18	19	19	3	2	3	3	2	2	3	3
Bulgaria	BGR	Capture	Atlantic bonito	Atlantic bonito	Atlantic, Eastern Central	Marine fish	Sarda sarda (Bloch, 1793)	Atlantic bonito	4.5	243	32	37	22	0	75	8	23	46	0	0	0	0	0	0	0	0	0	0	0	0	0	0	0	0	0	0	0	0	0	0	0	0	0	0	0	0	0	0	0
Bulgaria	BGR	Capture	Atlantic bonito	Atlantic bonito	Mediterranean and Black Sea	Marine fish	Sarda sarda (Bloch, 1793)	Atlantic bonito	4.5	999	40	44	11	1	13	191	4	24	1	1	0	13	0	0	17	15	12	8	0	25	33	16	51	20	35	49	0	23	18	56	8	1	16	5	16	8	96	6	6
Bulgaria	BGR	Capture	Atlantic chub mackerel	Atlantic chub mackerel	Atlantic, Eastern Central	Marine fish	Scomber colias Gmelin, 1789	Atlantic chub mackerel	3.9	12652	692	1660	1484	0	3516	307	390	294	0	0	0	0	0	0	186	3361	120	0	0	0	0	0	486	0	21	135	0	0	0	0	0	0	0	0	0	0	0	0	0
Bulgaria	BGR	Capture	Atlantic chub mackerel	Atlantic chub mackerel	Atlantic, Southeast	Marine fish	Scomber colias Gmelin, 1789	Atlantic chub mackerel	3.9	14366	6156	3643	802	88	73	974	487	1920	26	173	19	5	0	0	0	0	0	0	0	0	0	0	0	0	0	0	0	0	0	0	0	0	0	0	0	0	0	0	0
Bulgaria	BGR	Capture	Atlantic cod	Atlantic cod	Atlantic, Northeast	Marine fish	Gadus morhua Linnaeus, 1758	Atlantic cod	4.1	2176	0	29	1368	702	54	23	0	0	0	0	0	0	0	0	0	0	0	0	0	0	0	0	0	0	0	0	0	0	0	0	0	0	0	0	0	0	0	0	0
Bulgaria	BGR	Capture	Atlantic cod	Atlantic cod	Atlantic, Northwest	Marine fish	Gadus morhua Linnaeus, 1758	Atlantic cod	4.1	102	0	0	8	93	1	0	0	0	0	0	0	0	0	0	0	0	0	0	0	0	0	0	0	0	0	0	0	0	0	0	0	0	0	0	0	0	0	0	0
Bulgaria	BGR	Capture	Atlantic herring	Atlantic herring	Atlantic, Northeast	Marine fish	Clupea harengus Linnaeus, 1758	Atlantic herring	3.4	224	224	0	0	0	0	0	0	0	0	0	0	0	0	0	0	0	0	0	0	0	0	0	0	0	0	0	0	0	0	0	0	0	0	0	0	0	0	0	0
Bulgaria	BGR	Capture	Atlantic herring	Atlantic herring	Atlantic, Northwest	Marine fish	Clupea harengus Linnaeus, 1758	Atlantic herring	3.4	675	114	0	0	0	0	0	0	0	0	0	0	0	0	0	561	0	0	0	0	0	0	0	0	0	0	0	0	0	0	0	0	0	0	0	0	0	0	0	0
Bulgaria	BGR	Capture	Atlantic horse mackerel	Atlantic horse mackerel	Atlantic, Eastern Central	Marine fish	Trachurus trachurus (Linnaeus, 1758)	Atlantic horse mackerel	3.7	52885	9242	13666	5541	0	18041	108	3102	1399	0	0	0	0	0	0	0	0	0	0	0	0	0	0	0	0	185	1601	0	0	0	0	0	0	0	0	0	0	0	0	0
Bulgaria	BGR	Capture	Atlantic horse mackerel	Atlantic horse mackerel	Atlantic, Northeast	Marine fish	Trachurus trachurus (Linnaeus, 1758)	Atlantic horse mackerel	3.7	6170	5892	0	0	0	0	0	0	0	0	0	0	0	8	0	44	0	0	226	0	0	0	0	0	0	0	0	0	0	0	0	0	0	0	0	0	0	0	0	0
Bulgaria	BGR	Capture	Atlantic mackerel	Atlantic mackerel	Atlantic, Northeast	Marine fish	Scomber scombrus Linnaeus, 1758	Atlantic mackerel	3.6	39300	27303	0	0	9	0	449	510	0	4	1538	412	565	288	754	1168	2420	1997	1883	0	0	0	0	0	0	0	0	0	0	0	0	0	0	0	0	0	0	0	0	0
Bulgaria	BGR	Capture	Atlantic mackerel	Atlantic mackerel	Atlantic, Northwest	Marine fish	Scomber scombrus Linnaeus, 1758	Atlantic mackerel	3.6	18368	13940	3110	30	52	0	0	0	0	0	0	0	0	0	0	1236	0	0	0	0	0	0	0	0	0	0	0	0	0	0	0	0	0	0	0	0	0	0	0	0
Bulgaria	BGR	Capture	Atlantic wolffish	Atlantic wolffish	Atlantic, Northeast	Marine fish	Anarhichas lupus Linnaeus, 1758	Atlantic wolffish	3.6	118	0	0	3	54	15	46	0	0	0	0	0	0	0	0	0	0	0	0	0	0	0	0	0	0	0	0	0	0	0	0	0	0	0	0	0	0	0	0	0
Bulgaria	BGR	Capture	Barbel	Barbel	Europe - Inland waters	Freshwater fish	Barbus barbus (Linnaeus, 1758)	Barbel	3.1	887	0	0	0	0	0	0	0	0	0	0	0	0	0	0	0	0	0	0	0	92	120	142	113	93	43	3	4	1	47	34	33	10	11	10	12	28	19	15	12
Bulgaria	BGR	Capture	Beaked redfish	Beaked redfish	Atlantic, Northeast	Marine fish	Sebastes mentella Travin, 1951	Beaked redfish	4.2	45022	0	0	0	0	0	0	0	0	0	0	11385	12270	8769	4546	2739	1522	628	3163	0	0	0	0	0	0	0	0	0	0	0	0	0	0	0	0	0	0	0	0	0
Bulgaria	BGR	Capture	Beluga	Beluga	Europe - Inland waters	Freshwater fish	Huso huso (Linnaeus, 1758)	Beluga	4.4	207	0	0	0	0	0	0	0	0	0	0	0	0	0	0	0	0	0	0	0	21	24	31	31	27	18	7	10	8	10	13	6	0	0	0	1	0	0	0	0
Bulgaria	BGR	Capture	Bighead carp	Bighead carp	Europe - Inland waters	Freshwater fish	Hypophthalmichthys nobilis (Richardson, 1845)	Bighead carp	2.8	3798	0	0	0	0	0	0	0	0	0	0	0	0	0	0	0	0	0	0	0	0	0	0	0	0	0	0	223	233	427	374	472	199	334	381	259	365	430	27	39
Bulgaria	BGR	Capture	Big-scale sand smelt	Big-scale sand smelt	Mediterranean and Black Sea	Marine fish	Atherina boyeri Risso, 1810	Big-scale sand smelt	3.2	260	0	0	0	0	0	0	0	0	0	0	0	0	0	0	0	0	0	0	0	0	0	0	0	1	21	2	0	0	1	1	1	9	2	14	27	16	28	10	58
Bulgaria	BGR	Capture	Bleak	Bleak	Europe - Inland waters	Freshwater fish	Alburnus alburnus (Linnaeus, 1758)	Bleak	2.7	448	0	0	0	0	0	0	0	0	0	0	0	0	0	0	0	0	0	0	0	2	6	62	67	92	24	3	19	23	45	29	24	5	5	9	6	6	5	4	3
Bulgaria	BGR	Capture	Blue whiting(=Poutassou)	Blue whiting	Atlantic, Northeast	Marine fish	Micromesistius poutassou (Risso, 1827)	Blue whiting	4.1	26714	0	0	17	7297	7696	4697	3943	0	72	0	240	632	1729	360	31	0	0	0	0	0	0	0	0	0	0	0	0	0	0	0	0	0	0	0	0	0	0	0	0
Bulgaria	BGR	Capture	Bluefish	Bluefish	Atlantic, Eastern Central	Marine fish	Pomatomus saltatrix (Linnaeus, 1766)	Bluefish	4.5	310	43	5	46	0	54	1	126	35	0	0	0	0	0	0	0	0	0	0	0	0	0	0	0	0	0	0	0	0	0	0	0	0	0	0	0	0	0	0	0
Bulgaria	BGR	Capture	Bluefish	Bluefish	Mediterranean and Black Sea	Marine fish	Pomatomus saltatrix (Linnaeus, 1766)	Bluefish	4.5	2906	62	22	86	21	24	41	8	4	12	0	5	4	1	0	6	10	4	8	8	12	10	12	10	8	18	2	102	18	5	83	8	8	25	53	63	29	553	49	305
Bulgaria	BGR	Capture	Butterfishes, pomfrets nei	Butterfish, pomfret	Atlantic, Southwest	Marine fish	C19	Butterfish and pomfret	4.25	358	0	0	0	0	0	0	0	0	10	1	0	1	322	0	24	0	0	0	0	0	0	0	0	0	0	0	0	0	0	0	0	0	0	0	0	0	0	0	0
Bulgaria	BGR	Capture	Cape horse mackerel	Cape horse mackerel	Atlantic, Southeast	Marine fish	Trachurus capensis Castelnau, 1861	Cape horse mackerel	3.5	525866	10359	31133	25851	18130	18588	37336	48414	51177	50465	42843	48501	49391	43791	43428	6459	0	0	0	0	0	0	0	0	0	0	0	0	0	0	0	0	0	0	0	0	0	0	0	0
Bulgaria	BGR	Capture	Capelin	Capelin	Atlantic, Northeast	Marine fish	Mallotus villosus (Müller, 1776)	Capelin	3.2	15082	0	2690	6456	5256	680	0	0	0	0	0	0	0	0	0	0	0	0	0	0	0	0	0	0	0	0	0	0	0	0	0	0	0	0	0	0	0	0	0	0
Bulgaria	BGR	Capture	Capelin	Capelin	Atlantic, Northwest	Marine fish	Mallotus villosus (Müller, 1776)	Capelin	3.2	4980	1271	3470	25	214	0	0	0	0	0	0	0	0	0	0	0	0	0	0	0	0	0	0	0	0	0	0	0	0	0	0	0	0	0	0	0	0	0	0	0
Bulgaria	BGR	Capture	Cyprinids nei	Carp	Europe - Inland waters	Freshwater fish	C350	Carp	2.5	1031	0	0	0	0	0	0	0	0	0	0	100	116	91	120	0	0	0	0	0	0	0	1	251	250	102	0	0	0	0	0	0	0	0	0	0	0	0	0	0
Bulgaria	BGR	Capture	Channel catfish	Channel catfish	Europe - Inland waters	Freshwater fish	Ictalurus punctatus (Rafinesque, 1818)	Channel catfish	4.2	142	0	0	0	0	0	0	0	0	0	0	0	0	0	0	0	0	0	0	0	0	0	0	0	0	0	26	18	11	18	8	57	0	2	1	1	0	0	0	0
Bulgaria	BGR	Capture	Chilean jack mackerel	Chilean jack mackerel	Pacific, Southeast	Marine fish	Trachurus murphyi Nichols, 1920	Chilean jack mackerel	3.3	88938	0	0	0	4726	15065	12629	13561	24324	14694	2290	0	0	0	0	1649	0	0	0	0	0	0	0	0	0	0	0	0	0	0	0	0	0	0	0	0	0	0	0	0
Bulgaria	BGR	Capture	Chub	Chub	Europe - Inland waters	Freshwater fish	Squalius cephalus (Linnaeus, 1758)	Chubs nei	2.7	457	0	0	0	0	0	0	0	0	0	0	0	0	0	0	0	0	0	0	0	0	0	92	121	150	43	4	17	13	6	4	2	0	0	2	1	1	1	0	0
Bulgaria	BGR	Capture	Pacific chub mackerel	Chub mackerel	Pacific, Southeast	Marine fish	Scomber japonicus Houttuyn, 1782	Chub mackerel	3.4	1550	0	0	0	35	89	997	73	338	13	0	0	0	0	0	5	0	0	0	0	0	0	0	0	0	0	0	0	0	0	0	0	0	0	0	0	0	0	0	0
Bulgaria	BGR	Capture	Common carp	Common carp	Europe - Inland waters	Freshwater fish	Cyprinus carpio Linnaeus, 1758	Common carp	3.1	9836	0	0	0	0	0	0	0	0	0	569	0	3	0	0	0	0	0	0	0	19	16	281	251	302	143	880	521	752	999	736	723	540	464	804	502	641	610	17	21
Bulgaria	BGR	Capture	Common nase	Common nase	Europe - Inland waters	Freshwater fish	Chondrostoma nasus (Linnaeus, 1758)	Common nase	2	137	0	0	0	0	0	0	0	0	0	0	0	0	0	0	0	0	0	0	0	0	0	3	3	4	8	7	17	14	17	20	13	2	3	3	2	3	3	4	3
Bulgaria	BGR	Capture	Crucian carp	Crucian carp	Europe - Inland waters	Freshwater fish	Carassius carassius (Linnaeus, 1758)	Crucian carp	3.1	175	0	0	0	0	0	0	0	0	0	0	0	0	0	0	0	0	0	0	0	0	0	0	0	0	0	0	0	0	0	0	0	6	35	23	13	94	4	0	0
Bulgaria	BGR	Capture	Marine crustaceans nei	Crustacean	Atlantic, Northeast	Crustacean	Crustacean	Crustacean	2.5	1052	0	0	0	0	367	300	385	0	0	0	0	0	0	0	0	0	0	0	0	0	0	0	0	0	0	0	0	0	0	0	0	0	0	0	0	0	0	0	0
Bulgaria	BGR	Capture	Dentex nei	Dentex	Atlantic, Eastern Central	Marine fish	C48	Dentex	4	990	55	75	124	0	23	0	0	0	0	0	0	0	0	0	5	686	0	0	0	0	0	0	0	0	12	10	0	0	0	0	0	0	0	0	0	0	0	0	0
Bulgaria	BGR	Capture	European anchovy	European anchovy	Atlantic, Eastern Central	Marine fish	Engraulis encrasicolus (Linnaeus, 1758)	European anchovy	3.1	848	0	0	0	0	0	0	0	0	0	0	0	0	0	0	0	0	0	0	0	0	0	0	848	0	0	0	0	0	0	0	0	0	0	0	0	0	0	0	0
Bulgaria	BGR	Capture	European anchovy	European anchovy	Mediterranean and Black Sea	Marine fish	Engraulis encrasicolus (Linnaeus, 1758)	European anchovy	3.1	3988	72	113	37	307	209	70	266	784	239	92	96	13	115	0	0	0	0	0	0	35	23	44	48	36	64	102	237	131	88	14	6	60	28	42	65	18	9	10	370
Bulgaria	BGR	Capture	European perch	European perch	Europe - Inland waters	Freshwater fish	Perca fluviatilis Linnaeus, 1758	European perch	4.4	400	0	0	0	0	0	0	0	0	0	0	0	0	0	0	0	0	0	0	0	0	0	63	81	102	26	6	23	42	20	13	5	2	4	7	2	3	1	0	0
Bulgaria	BGR	Capture	European pilchard(=Sardine)	European pilchard	Atlantic, Eastern Central	Marine fish	Sardina pilchardus (Walbaum, 1792)	European pilchard	3.1	111158	13848	30105	22124	0	24783	8458	0	505	0	0	0	0	0	0	0	9225	2062	0	0	0	0	0	48	0	0	0	0	0	0	0	0	0	0	0	0	0	0	0	0
Bulgaria	BGR	Capture	European pilchard(=Sardine)	European pilchard	Atlantic, Northeast	Marine fish	Sardina pilchardus (Walbaum, 1792)	European pilchard	3.1	184	184	0	0	0	0	0	0	0	0	0	0	0	0	0	0	0	0	0	0	0	0	0	0	0	0	0	0	0	0	0	0	0	0	0	0	0	0	0	0
Bulgaria	BGR	Capture	European sprat	European sprat	Mediterranean and Black Sea	Marine fish	Sprattus sprattus (Linnaeus, 1758)	European sprat	3	275822	7199	8754	10596	13541	16568	18880	16524	12023	13921	15924	11690	10979	6199	7403	2651	2710	2353	2174	2200	2874	3535	3646	3275	3595	1737	695	11595	9155	2889	2575	2655	2985	4310	4551	4041	3958	2830	3794	2279
Bulgaria	BGR	Capture	Falkland sprat	Falkland sprat	Atlantic, Southwest	Marine fish	Sprattus fuegensis (Jenyns, 1842)	Falkland sprat	2.6	555	0	0	0	0	0	0	0	0	0	509	46	0	0	0	0	0	0	0	0	0	0	0	0	0	0	0	0	0	0	0	0	0	0	0	0	0	0	0	0
Bulgaria	BGR	Capture	Flathead grey mullet	Flathead grey mullet	Atlantic, Eastern Central	Marine fish	Mugil cephalus Linnaeus, 1758	Flathead grey mullet	2.5	342	2	0	0	0	173	2	20	145	0	0	0	0	0	0	0	0	0	0	0	0	0	0	0	0	0	0	0	0	0	0	0	0	0	0	0	0	0	0	0
Bulgaria	BGR	Capture	Flathead grey mullet	Flathead grey mullet	Mediterranean and Black Sea	Marine fish	Mugil cephalus Linnaeus, 1758	Flathead grey mullet	2.5	442	0	0	0	0	0	0	0	0	0	0	0	0	0	0	0	0	0	0	0	23	26	28	11	14	15	47	71	33	18	6	11	6	9	11	19	15	25	9	16
Bulgaria	BGR	Capture	Freshwater bream	Freshwater bream	Europe - Inland waters	Freshwater fish	Abramis brama (Linnaeus, 1758)	Freshwater bream	3.1	1368	47	36	54	44	41	39	56	0	0	0	50	70	63	60	0	0	0	0	70	74	91	90	82	71	25	4	6	30	65	41	40	9	11	9	8	17	17	13	9
Bulgaria	BGR	Capture	Freshwater fishes nei	Freshwater fish	Europe - Inland waters	Freshwater fish	Weighted mean	Freshwater fish	2.90645	20005	1500	788	608	620	744	312	650	668	1050	775	2149	1083	921	1200	1534	1364	1521	1576	590	39	182	0	1	0	0	74	5	0	16	12	11	6	2	3	0	0	0	0	0
Bulgaria	BGR	Capture	Garfish	Garfish	Mediterranean and Black Sea	Marine fish	Belone belone (Linnaeus, 1760)	Garfish	4.2	139	0	0	0	0	0	0	0	0	0	0	0	0	0	0	0	0	0	0	0	0	2	2	4	4	9	16	37	8	4	2	0	3	4	5	4	5	3	5	3
Bulgaria	BGR	Capture	Atlantic redfishes nei	Golden redfish	Atlantic, Northeast	Marine fish	Sebastes norvegicus (Ascanius, 1772)	Golden redfish	4	10007	0	165	76	678	89	210	0	0	2961	5828	0	0	0	0	0	0	0	0	0	0	0	0	0	0	0	0	0	0	0	0	0	0	0	0	0	0	0	0	0
Bulgaria	BGR	Capture	Atlantic redfishes nei	Golden redfish	Atlantic, Northwest	Marine fish	Sebastes norvegicus (Ascanius, 1772)	Golden redfish	4	1696	1	0	58	1578	59	0	0	0	0	0	0	0	0	0	0	0	0	0	0	0	0	0	0	0	0	0	0	0	0	0	0	0	0	0	0	0	0	0	0
Bulgaria	BGR	Capture	Goldfish	Goldfish	Europe - Inland waters	Freshwater fish	Carassius auratus (Linnaeus, 1758)	Goldfish	2	3500	0	0	0	0	0	0	0	0	0	0	0	0	0	0	0	0	0	0	0	0	0	328	392	360	179	138	247	307	304	208	135	100	127	132	129	192	168	13	10
Bulgaria	BGR	Capture	Grass carp(=White amur)	Grass carp	Europe - Inland waters	Freshwater fish	Ctenopharyngodon idella (Valenciennes, 1844)	Grass carp	2	437	0	0	0	0	0	0	0	0	0	0	0	0	0	0	0	0	0	0	0	3	8	8	17	20	12	18	23	30	40	47	51	23	27	21	19	18	30	5	5
Bulgaria	BGR	Capture	Gobies nei	Grass goby	Mediterranean and Black Sea	Marine fish	Zosterisessor ophiocephalus (Pallas, 1814)	Grass goby	3.2	4135	36	11	7	7	9	9	4	5	39	81	77	23	10	23	14	24	20	10	11	580	477	424	381	437	145	142	142	125	79	49	31	74	26	37	44	85	90	75	64
Bulgaria	BGR	Capture	Grenadiers nei	Grenadiers	Atlantic, Southwest	Marine fish	Coryphaenoides filicauda Günther, 1878	Grenadier	3.5	2947	0	0	0	0	0	0	0	0	0	0	25	1378	1412	132	0	0	0	0	0	0	0	0	0	0	0	0	0	0	0	0	0	0	0	0	0	0	0	0	0
Bulgaria	BGR	Capture	Grey rockcod	Grey rockcod	Atlantic, Southwest	Marine fish	Lepidonotothen squamifrons (Günther, 1880)	Grey rockcod	3.5	7249	0	0	0	0	0	0	0	0	10	2743	1813	82	0	0	1307	1294	0	0	0	0	0	0	0	0	0	0	0	0	0	0	0	0	0	0	0	0	0	0	0
Bulgaria	BGR	Capture	Haddock	Haddock	Atlantic, Northeast	Marine fish	Melanogrammus aeglefinus (Linnaeus, 1758)	Haddock	4	293	0	0	228	62	3	0	0	0	0	0	0	0	0	0	0	0	0	0	0	0	0	0	0	0	0	0	0	0	0	0	0	0	0	0	0	0	0	0	0
Bulgaria	BGR	Capture	Indian mackerel	Indian mackerel	Indian Ocean, Western	Marine fish	Rastrelliger kanagurta (Cuvier, 1816)	Indian mackerel	3.2	844	0	0	0	843	0	0	1	0	0	0	0	0	0	0	0	0	0	0	0	0	0	0	0	0	0	0	0	0	0	0	0	0	0	0	0	0	0	0	0
Bulgaria	BGR	Capture	Jack and horse mackerels nei	Jack and horse mackerel	Atlantic, Eastern Central	Marine fish	C122	Jack and horse mackerel	3.5	8867	41	0	0	0	0	0	0	5591	0	0	0	0	0	0	10	1556	0	0	0	0	0	0	1669	0	0	0	0	0	0	0	0	0	0	0	0	0	0	0	0
Bulgaria	BGR	Capture	Large-eye dentex	Large-eye dentex	Atlantic, Southeast	Marine fish	Dentex macrophthalmus (Bloch, 1791)	Large-eye dentex	3.5	848	24	78	9	30	4	0	0	169	206	127	67	0	0	95	39	0	0	0	0	0	0	0	0	0	0	0	0	0	0	0	0	0	0	0	0	0	0	0	0
Bulgaria	BGR	Capture	Largehead hairtail	Largehead hairtail	Atlantic, Eastern Central	Marine fish	Trichiurus lepturus Linnaeus, 1758	Largehead hairtail	4.4	1743	9	0	0	0	0	0	219	123	0	0	0	0	0	0	0	0	0	0	0	0	0	0	1383	0	0	9	0	0	0	0	0	0	0	0	0	0	0	0	0
Bulgaria	BGR	Capture	Leaping mullet	Leaping mullet	Mediterranean and Black Sea	Marine fish	Chelon saliens (Risso, 1810)	Leaping mullet	2.9	330	15	7	8	19	6	10	3	26	6	1	6	10	12	3	1	7	5	6	6	1	3	2	2	2	0	10	18	16	8	1	2	15	4	7	9	8	15	13	17
Bulgaria	BGR	Capture	Longtail Southern cod	Longtail southern cod	Atlantic, Southwest	Marine fish	Patagonotothen ramsayi (Regan, 1913)	Longtail southern cod	3.5	5698	0	0	0	0	0	0	0	0	0	0	0	0	0	5698	0	0	0	0	0	0	0	0	0	0	0	0	0	0	0	0	0	0	0	0	0	0	0	0	0
Bulgaria	BGR	Capture	Marine fishes nei	Marine fish	Atlantic, Eastern Central	Marine fish	Weighted mean	Marine fish	3.35436	9544	1130	2676	1318	0	2123	78	946	503	0	0	0	0	0	0	0	0	0	0	0	0	0	0	269	0	499	2	0	0	0	0	0	0	0	0	0	0	0	0	0
Bulgaria	BGR	Capture	Marine fishes nei	Marine fish	Atlantic, Northeast	Marine fish	Weighted mean	Marine fish	3.87489	2064	800	321	130	313	313	187	0	0	0	0	0	0	0	0	0	0	0	0	0	0	0	0	0	0	0	0	0	0	0	0	0	0	0	0	0	0	0	0	0
Bulgaria	BGR	Capture	Marine fishes nei	Marine fish	Atlantic, Southeast	Marine fish	Weighted mean	Marine fish	3.55601	7100	1300	3361	1514	624	284	0	0	17	0	0	0	0	0	0	0	0	0	0	0	0	0	0	0	0	0	0	0	0	0	0	0	0	0	0	0	0	0	0	0
Bulgaria	BGR	Capture	Marine fishes nei	Marine fish	Atlantic, Southwest	Marine fish	Weighted mean	Marine fish	3.53966	520	0	449	0	0	0	0	0	0	0	71	0	0	0	0	0	0	0	0	0	0	0	0	0	0	0	0	0	0	0	0	0	0	0	0	0	0	0	0	0
Bulgaria	BGR	Capture	Marine fishes nei	Marine fish	Indian Ocean, Western	Marine fish	Weighted mean	Marine fish	3.2	1026	0	0	136	888	0	0	2	0	0	0	0	0	0	0	0	0	0	0	0	0	0	0	0	0	0	0	0	0	0	0	0	0	0	0	0	0	0	0	0
Bulgaria	BGR	Capture	Marine fishes nei	Marine fish	Mediterranean and Black Sea	Marine fish	Weighted mean	Marine fish	3.09483	859	35	76	58	53	60	30	6	49	50	15	0	25	49	4	13	7	14	7	8	70	49	51	107	0	0	2	0	0	0	0	15	0	1	0	3	2	0	0	0
Bulgaria	BGR	Capture	Marine fishes nei	Marine fish	Pacific, Northeast	Marine fish	Weighted mean	Marine fish	4.4	364	355	0	0	0	0	9	0	0	0	0	0	0	0	0	0	0	0	0	0	0	0	0	0	0	0	0	0	0	0	0	0	0	0	0	0	0	0	0	0
Bulgaria	BGR	Capture	Marine fishes nei	Marine fish	Pacific, Southeast	Marine fish	Weighted mean	Marine fish	3.30327	2814	0	0	0	2324	490	0	0	0	0	0	0	0	0	0	0	0	0	0	0	0	0	0	0	0	0	0	0	0	0	0	0	0	0	0	0	0	0	0	0
Bulgaria	BGR	Capture	Mediterranean horse mackerel	Mediterranean horse mackerel	Mediterranean and Black Sea	Marine fish	Trachurus mediterraneus (Steindachner, 1868)	Mediterranean horse mackerel	3.8	16600	1809	791	565	935	820	476	384	497	1016	756	871	826	1677	1101	164	232	82	79	80	70	68	36	40	30	111	130	142	142	74	29	63	116	180	177	165	395	381	272	113
Bulgaria	BGR	Capture	North Pacific hake	North Pacific hake	Pacific, Northeast	Marine fish	Merluccius productus (Ayres, 1855)	North Pacific hake	4.4	37154	23000	0	0	0	0	6756	7398	0	0	0	0	0	0	0	0	0	0	0	0	0	0	0	0	0	0	0	0	0	0	0	0	0	0	0	0	0	0	0	0
Bulgaria	BGR	Capture	Northern pike	Northern pike	Europe - Inland waters	Freshwater fish	Esox lucius Linnaeus, 1758	Northern pike	4.1	279	0	0	0	0	0	0	0	0	0	0	0	0	0	0	0	0	0	0	0	0	0	19	41	74	14	2	6	7	13	20	25	8	8	8	8	10	10	2	2
Bulgaria	BGR	Capture	Patagonian grenadier	Patagonian grenadier	Atlantic, Southwest	Marine fish	Macruronus magellanicus Lönnberg, 1907	Patagonian grenadier	3.9	55610	0	0	0	0	0	0	0	0	165	1106	766	9627	33595	9160	983	171	37	0	0	0	0	0	0	0	0	0	0	0	0	0	0	0	0	0	0	0	0	0	0
Bulgaria	BGR	Capture	Patagonian rockcod	Patagonian rockcod	Atlantic, Southwest	Marine fish	Patagonotothen brevicauda (Lönnberg, 1905)	Patagonian rockcod	3.9	2529	0	0	0	0	0	0	0	0	2068	433	28	0	0	0	0	0	0	0	0	0	0	0	0	0	0	0	0	0	0	0	0	0	0	0	0	0	0	0	0
Bulgaria	BGR	Capture	Patagonian toothfish	Patagonian toothfish	Atlantic, Antarctic	Marine fish	Dissostichus eleginoides Smitt, 1898	Patagonian toothfish	4.5	588	0	0	0	0	0	0	0	0	0	0	0	0	0	0	0	0	145	193	250	0	0	0	0	0	0	0	0	0	0	0	0	0	0	0	0	0	0	0	0
Bulgaria	BGR	Capture	Patagonian toothfish	Patagonian toothfish	Atlantic, Southwest	Marine fish	Dissostichus eleginoides Smitt, 1898	Patagonian toothfish	4.5	631	0	0	0	0	0	0	0	0	43	88	13	95	51	331	8	2	0	0	0	0	0	0	0	0	0	0	0	0	0	0	0	0	0	0	0	0	0	0	0
Bulgaria	BGR	Capture	Picked dogfish	Picked dogfish	Mediterranean and Black Sea	Marine fish	Squalus acanthias Linnaeus, 1758	Picked dogfish	4.4	1902	0	0	0	0	0	27	20	52	53	68	153	90	51	28	16	21	14	12	12	80	64	40	28	25	102	126	100	51	47	15	6	24	23	9	77	81	29	31	34
Bulgaria	BGR	Capture	Pike-perch	Pike-perch	Europe - Inland waters	Freshwater fish	Sander lucioperca (Linnaeus, 1758)	Pike-perch	4	990	32	20	42	67	86	40	48	0	0	0	5	18	1	10	10	15	34	29	30	22	26	45	54	68	27	5	18	25	48	31	25	5	11	14	18	20	22	4	4
Bulgaria	BGR	Capture	Pontic shad	Pontic shad	Europe - Inland waters	Freshwater fish	Alosa immaculata Bennett, 1835	Pontic shad	4	1488	38	42	50	67	5	53	136	128	34	60	58	17	10	60	60	57	23	42	30	31	124	86	87	32	29	16	35	12	22	16	1	0	2	3	4	6	3	2	2
Bulgaria	BGR	Capture	Pontic shad	Pontic shad	Mediterranean and Black Sea	Marine fish	Alosa immaculata Bennett, 1835	Pontic shad	4	1574	67	23	24	30	4	10	39	51	44	37	9	6	24	24	17	15	20	14	15	112	109	79	84	41	10	16	106	56	78	38	18	26	27	37	59	52	25	26	21
Bulgaria	BGR	Capture	Porgies, seabreams nei	Porgy, seabream	Atlantic, Eastern Central	Marine fish	C188	Porgy and seabream	3.55	1251	16	0	0	0	383	27	493	297	0	0	0	0	0	0	0	0	0	0	0	0	0	0	35	0	0	0	0	0	0	0	0	0	0	0	0	0	0	0	0
Bulgaria	BGR	Capture	Northern prawn	Prawn	Atlantic, Northeast	Crustacean	Crustacean	Crustacean	2.5	638	0	0	0	0	0	0	0	265	0	332	41	0	0	0	0	0	0	0	0	0	0	0	0	0	0	0	0	0	0	0	0	0	0	0	0	0	0	0	0
Bulgaria	BGR	Capture	Rainbow trout	Rainbow trout	Europe - Inland waters	Freshwater fish	Oncorhynchus mykiss (Walbaum, 1792)	Rainbow trout	4.1	231	0	0	0	0	0	0	0	0	0	0	0	0	0	0	0	0	0	0	0	0	0	12	10	10	5	17	21	47	22	17	15	4	0	6	6	7	27	5	0
Bulgaria	BGR	Capture	Red mullet	Red mullet	Mediterranean and Black Sea	Marine fish	Mullus barbatus Linnaeus, 1758	Red mullet	3.1	4188	0	0	0	0	0	0	0	0	0	0	0	0	0	0	0	0	0	0	0	0	0	0	0	0	5	26	33	36	17	1	6	13	17	48	72	176	131	258	314
Bulgaria	BGR	Capture	Roach	Roach	Europe - Inland waters	Freshwater fish	Rutilus rutilus (Linnaeus, 1758)	Roach	3	110	0	0	0	0	0	0	0	0	0	0	0	0	0	0	0	0	0	0	0	0	0	0	10	40	0	0	14	10	13	9	12	0	0	1	1	0	0	0	0
Bulgaria	BGR	Capture	Rudd	Rudd	Europe - Inland waters	Freshwater fish	Scardinius erythrophthalmus (Linnaeus, 1758)	Rudd	2.9	433	0	0	0	0	0	0	0	0	0	0	0	0	0	0	0	0	0	0	0	0	0	0	71	90	39	3	45	35	41	33	19	7	17	19	4	6	3	1	0
Bulgaria	BGR	Capture	Ruffs, barrelfishes nei	Ruffe	Atlantic, Southwest	Marine fish	Gymnocephalus cernua (Linnaeus, 1758)	Ruffe	3.3	840	0	0	0	0	0	0	0	0	0	0	0	60	363	417	0	0	0	0	0	0	0	0	0	0	0	0	0	0	0	0	0	0	0	0	0	0	0	0	0
Bulgaria	BGR	Capture	Sardinellas nei	Sardine	Atlantic, Eastern Central	Marine fish	C209	Sardine	3.16667	8512	261	199	423	0	536	0	1289	1458	0	0	0	0	0	0	333	17	0	0	0	0	0	0	3216	0	665	115	0	0	0	0	0	0	0	0	0	0	0	0	0
Bulgaria	BGR	Capture	Sardinellas nei	Sardine	Atlantic, Southeast	Marine fish	C209	Sardine	3.16667	198	6	140	24	1	24	0	0	1	0	2	0	0	0	0	0	0	0	0	0	0	0	0	0	0	0	0	0	0	0	0	0	0	0	0	0	0	0	0	0
Bulgaria	BGR	Capture	Clupeoids nei	Sardine, Pilchard	Atlantic, Northeast	Marine fish	C35	Sardine and Pilchard	3.25	140	140	0	0	0	0	0	0	0	0	0	0	0	0	0	0	0	0	0	0	0	0	0	0	0	0	0	0	0	0	0	0	0	0	0	0	0	0	0	0
Bulgaria	BGR	Capture	Senegalese hake	Senegalese hake	Atlantic, Eastern Central	Marine fish	Merluccius senegalensis Cadenat, 1950	Senegalese hake	4.5	217	15	19	61	0	15	0	19	63	0	0	0	0	0	0	0	15	0	0	0	0	0	0	10	0	0	0	0	0	0	0	0	0	0	0	0	0	0	0	0
Bulgaria	BGR	Capture	Cape hakes	Shallow-water Cape hake	Atlantic, Southeast	Marine fish	Merluccius capensis Castelnau, 1861	Shallow-water Cape hake	3.9	73861	27815	14071	8754	8187	152	0	1322	4667	6004	302	393	0	0	179	2015	0	0	0	0	0	0	0	0	0	0	0	0	0	0	0	0	0	0	0	0	0	0	0	0
Bulgaria	BGR	Capture	Penaeus shrimps nei	Shrimp	Atlantic, Eastern Central	Crustacean	Crustacean	Crustacean	2.5	106	0	0	0	0	0	0	0	0	0	0	0	0	0	0	0	0	0	0	0	0	0	0	0	0	0	106	0	0	0	0	0	0	0	0	0	0	0	0	0
Bulgaria	BGR	Capture	Silver carp	Silver carp	Europe - Inland waters	Freshwater fish	Hypophthalmichthys molitrix (Valenciennes, 1844)	Silver carp	2	4242	0	0	0	0	0	0	0	0	0	0	0	0	0	0	0	0	0	0	250	415	488	471	553	488	42	403	85	156	100	197	122	114	109	100	55	21	31	5	11
Bulgaria	BGR	Capture	Silver hake	Silver hake	Atlantic, Northwest	Marine fish	Merluccius bilinearis (Mitchill, 1814)	Silver hake	4.5	11752	3321	2281	606	4639	817	0	0	0	0	0	0	0	0	0	88	0	0	0	0	0	0	0	0	0	0	0	0	0	0	0	0	0	0	0	0	0	0	0	0
Bulgaria	BGR	Capture	Southern African pilchard	South American pilchard	Atlantic, Southeast	Marine fish	Sardinops sagax (Jenyns, 1842)	South American pilchard	2.8	1016	32	956	15	0	0	0	0	13	0	0	0	0	0	0	0	0	0	0	0	0	0	0	0	0	0	0	0	0	0	0	0	0	0	0	0	0	0	0	0
Bulgaria	BGR	Capture	South Pacific hake	South Pacific hake	Pacific, Southeast	Marine fish	Merluccius gayi (Guichenot, 1848)	South Pacific hake	4.3	126	0	0	0	0	0	0	0	126	0	0	0	0	0	0	0	0	0	0	0	0	0	0	0	0	0	0	0	0	0	0	0	0	0	0	0	0	0	0	0
Bulgaria	BGR	Capture	Southern blue whiting	Southern blue whiting	Atlantic, Southwest	Marine fish	Micromesistius australis Norman, 1937	Southern blue whiting	3.3	90586	0	0	0	0	0	0	0	0	2618	4830	10729	7766	2223	8468	20256	21181	9377	3138	0	0	0	0	0	0	0	0	0	0	0	0	0	0	0	0	0	0	0	0	0
Bulgaria	BGR	Capture	Argentine shortfin squid	Squid	Atlantic, Southwest	Cephalopod	Cephalopod	Cephalopod	3	39673	0	0	0	0	0	0	0	0	3200	5543	83	3223	3875	7581	5524	4079	5503	1062	0	0	0	0	0	0	0	0	0	0	0	0	0	0	0	0	0	0	0	0	0
Bulgaria	BGR	Capture	Northern shortfin squid	Squid	Atlantic, Northwest	Cephalopod	Cephalopod	Cephalopod	3	8305	1034	3050	955	3006	220	0	0	0	0	0	0	0	0	0	40	0	0	0	0	0	0	0	0	0	0	0	0	0	0	0	0	0	0	0	0	0	0	0	0
Bulgaria	BGR	Capture	Patagonian squid	Squid	Atlantic, Southwest	Cephalopod	Cephalopod	Cephalopod	3	11615	0	0	0	0	0	0	0	0	1897	2263	7405	50	0	0	0	0	0	0	0	0	0	0	0	0	0	0	0	0	0	0	0	0	0	0	0	0	0	0	0
Bulgaria	BGR	Capture	Sturgeons nei	Sturgeon	Europe - Inland waters	Freshwater fish	C276	Sturgeon	2.93333	317	25	21	31	66	13	21	23	25	9	6	8	7	1	13	13	8	12	10	5	0	0	0	0	0	0	0	0	0	0	0	0	0	0	0	0	0	0	0	0
Bulgaria	BGR	Capture	Sturgeons nei	Sturgeon	Mediterranean and Black Sea	Marine fish	Acipenser sturio Linnaeus, 1758	Sturgeon	3.5	400	42	51	97	50	37	28	27	11	3	3	22	14	0	15	0	0	0	0	0	0	0	0	0	0	0	0	0	0	0	0	0	0	0	0	0	0	0	0	0
Bulgaria	BGR	Capture	Surmullet	Surmullet	Mediterranean and Black Sea	Marine fish	Mullus surmuletus Linnaeus, 1758	Surmullet	3.5	149	0	0	0	0	0	0	0	0	0	0	0	0	0	0	0	0	0	0	0	0	0	0	0	0	0	0	0	0	0	0	0	2	2	24	38	33	12	15	15
Bulgaria	BGR	Capture	Thornback ray	Thornback ray	Mediterranean and Black Sea	Marine fish	Raja clavata Linnaeus, 1758	Thornback ray	3.8	587	0	0	0	0	0	0	0	0	0	0	0	0	0	0	0	0	0	0	0	0	0	0	0	0	0	0	0	0	0	0	0	4	26	47	72	93	69	56	70
Bulgaria	BGR	Capture	Tuna-like fishes nei	Tuna, bonito	Atlantic, Eastern Central	Marine fish	C309	Tuna and bonito	4.45556	297	0	0	0	0	0	0	8	0	0	0	0	0	0	0	0	0	0	0	0	0	0	0	225	0	9	55	0	0	0	0	0	0	0	0	0	0	0	0	0
Bulgaria	BGR	Capture	Turbot	Turbot	Mediterranean and Black Sea	Marine fish	Scophthalmus maximus (Linnaeus, 1758)	Turbot	4.4	1923	217	63	121	70	89	9	9	7	21	51	12	3	4	1	0	0	0	0	0	60	62	60	64	54	55	57	136	41	16	13	15	67	55	52	46	38	36	40	40
Bulgaria	BGR	Capture	Vimba bream	Vimba bream	Europe - Inland waters	Freshwater fish	Vimba vimba (Linnaeus, 1758)	Vimba bream	3.3	264	0	0	0	0	0	0	0	0	0	0	0	0	0	0	0	0	0	0	0	0	0	84	15	50	4	1	2	2	23	19	13	3	2	4	5	8	5	4	4
Bulgaria	BGR	Capture	Warehou nei	Warehou	Pacific, Southeast	Marine fish	C316	Warehou	3.35	333	0	0	0	0	0	0	0	333	0	0	0	0	0	0	0	0	0	0	0	0	0	0	0	0	0	0	0	0	0	0	0	0	0	0	0	0	0	0	0
Bulgaria	BGR	Capture	Wels(=Som) catfish	Wels catfish	Europe - Inland waters	Freshwater fish	Silurus glanis Linnaeus, 1758	Wels catfish	4.4	962	29	15	23	15	12	10	13	0	0	0	5	8	2	10	10	12	21	18	20	30	27	34	44	106	59	4	34	26	88	68	41	20	15	22	21	25	34	9	8
Bulgaria	BGR	Capture	Whiting	Whiting	Mediterranean and Black Sea	Marine fish	Merlangius merlangus (Linnaeus, 1758)	Whiting	4.4	1210	347	218	407	71	30	1	4	0	0	0	0	0	0	0	0	0	0	0	0	0	0	0	0	0	9	8	16	13	2	3	0	16	0	2	15	1	1	5	4
Bulgaria	BGR	Capture	Finfishes nei	Marine fish	Atlantic, Northwest	Marine fish	Weighted mean	Marine fish	3.8413	113	113	0	0	0	0	0	0	0	0	0	0	0	0	0	0	0	0	0	0	0	0	0	0	0	0	0	0	0	0	0	0	0	0	0	0	0	0	0	0
Bulgaria	BGR	Capture	Pelagic fishes nei	Pelagic fish	Atlantic, Northwest	Marine fish	Weighted mean	Pelagic fish	3.8413	334	0	334	0	0	0	0	0	0	0	0	0	0	0	0	0	0	0	0	0	0	0	0	0	0	0	0	0	0	0	0	0	0	0	0	0	0	0	0	0
Bulgaria	BGR	Aquaculture	Beluga	Beluga	Europe - Inland waters	Freshwater fish	Huso huso (Linnaeus, 1758)	Beluga	4.4	370.18	0	0	0	0	0	0	0	0	0	0	0	0	0	0	0	0	0	0	0	0	0	0	0	0	0	0	0	0	0	7	28	46	0	0.2	115.07	61.01	24.4	18.97	15
Bulgaria	BGR	Aquaculture	Bighead carp	Bighead carp	Europe - Inland waters	Freshwater fish	Hypophthalmichthys nobilis (Richardson, 1845)	Bighead carp	2.8	20302.7	0	0	0	0	0	0	0	0	0	0	0	0	0	0	0	0	0	0	0	0	0	0	0	0	0	0	0	0	440	279	298	397	721	758.3	1294.2	926.27	820.47	2226.46	1508.9
Bulgaria	BGR	Aquaculture	Channel catfish	Channel catfish	Europe - Inland waters	Freshwater fish	Ictalurus punctatus (Rafinesque, 1818)	Channel catfish	4.2	915.37	0	0	0	0	0	0	0	0	0	0	0	0	0	0	0	0	0	0	0	0	0	0	0	0	0	0	0	0	0	166	60	109	75	115.18	107.99	98	14.3	4.19	13
Bulgaria	BGR	Aquaculture	Common carp	Common carp	Europe - Inland waters	Freshwater fish	Cyprinus carpio Linnaeus, 1758	Common carp	3.1	223086	6002	7819	7566	9827	11274	12440	14253	11467	12584	7633	8621	10024	9527	9200	6189	6125	6324	6210	4700	3200	3500	3700	1535	2850	1250	544	539	785	626	926	842	1180	1469	1926.7	1905.8	1389.6	1288.4	3600.56	2436.5
Bulgaria	BGR	Aquaculture	Cyprinids nei	Carp	Europe - Inland waters	Freshwater fish	A13	Carp	2.73333	22992	125	164	109	98	100	86	100	0	950	1709	2127	959	960	960	960	987	1073	975	700	500	600	760	1468	1045	850	1463	1537	1627	0	0	0	0	0	0	0	0	0	0	0
Bulgaria	BGR	Aquaculture	Danube crayfish	Crayfish	Europe - Inland waters	Crustacean	Crustacean	Crustacean	2.5	171.29	0	0	0	0	0	0	0	0	0	0	0	0	0	0	0	0	0	0	0	0	0	0	0	0	0	0	0	0	0	3	0	1	3	2.79	9.86	6.22	3.4	32.35	17.06
Bulgaria	BGR	Aquaculture	Danube sturgeon(=Osetr)	Danube sturgeon	Europe - Inland waters	Freshwater fish	Acipenser gueldenstaedtii Brandt & Ratzeburg, 1833	Danube sturgeon	3.3	3258.56	0	0	0	0	0	0	0	0	0	0	0	0	0	0	0	0	0	0	0	0	0	0	0	0	0	38	1	1	3	276	113	144	110	241.21	333.23	215.36	277.61	260.74	234.3
Bulgaria	BGR	Aquaculture	Freshwater bream	Freshwater bream	Europe - Inland waters	Freshwater fish	Abramis brama (Linnaeus, 1758)	Freshwater bream	3.1	134.11	0	0	0	0	0	0	0	0	0	0	0	0	0	0	0	0	0	0	0	0	0	0	0	0	0	0	0	0	0	0	0	0	0	0.79	7.49	7.3	7.35	8.86	9.73
Bulgaria	BGR	Aquaculture	Freshwater fishes nei	Freshwater fish	Europe - Inland waters	Freshwater fish	Weighted mean	Freshwater fish	3.23342	2640	0	0	0	0	0	0	0	0	0	0	0	0	0	0	0	0	0	0	0	0	0	0	122	372	350	0	0	1792	2	2	0	0	0	0	0	0	0	0	0
Bulgaria	BGR	Aquaculture	Goldfish	Goldfish	Europe - Inland waters	Freshwater fish	Carassius auratus (Linnaeus, 1758)	Goldfish	2	2482.45	0	0	0	0	0	0	0	0	0	0	0	0	0	0	0	0	0	0	0	0	0	0	0	0	0	0	0	0	28	8	1	4	74	97.17	167.74	218.6	94.06	266.59	158.38
Bulgaria	BGR	Aquaculture	Grass carp(=White amur)	Grass carp	Europe - Inland waters	Freshwater fish	Ctenopharyngodon idella (Valenciennes, 1844)	Grass carp	2	5285.76	0	0	0	0	0	0	0	0	0	0	0	0	0	0	0	0	0	0	0	0	0	170	200	855	650	15	32	49	61	86	73	82	140	155.38	168.49	162.39	150.61	295.89	280.08
Bulgaria	BGR	Aquaculture	Mississippi paddlefish	Mississippi paddlefish	Europe - Inland waters	Freshwater fish	Polyodon spathula (Walbaum, 1792)	Mississippi paddlefish	3.4	209.06	0	0	0	0	0	0	0	0	0	0	0	0	0	0	0	0	0	0	0	0	0	0	0	0	0	0	0	0	0	0	0	0	0	0	0	0	0	0	0
Bulgaria	BGR	Aquaculture	North African catfish	North African catfish	Europe - Inland waters	Freshwater fish	Clarias gariepinus (Burchell, 1822)	North African catfish	3.8	2424.51	0	0	0	0	0	0	0	0	0	0	0	0	0	0	0	0	0	0	0	0	0	0	0	0	0	0	0	0	0	0	0	0	0	0	9.73	1.77	0	29.71	164.35
Bulgaria	BGR	Aquaculture	Northern pike	Northern pike	Europe - Inland waters	Freshwater fish	Esox lucius Linnaeus, 1758	Northern pike	4.1	661.03	0	0	0	0	0	0	0	0	0	0	0	0	0	0	0	0	0	0	0	0	0	0	0	248	70	5	11	11	2	4	7	13	25	20.84	18.77	16.91	5.83	44.57	26.3
Bulgaria	BGR	Aquaculture	Pike-perch	Pike-perch	Europe - Inland waters	Freshwater fish	Sander lucioperca (Linnaeus, 1758)	Pike-perch	4	1485.37	0	0	0	0	0	0	0	0	0	0	0	0	0	0	0	0	0	0	0	0	0	0	125	496	19	0	35	59	0	0	0	1	12	23.16	17.62	16.42	19.34	175.18	145
Bulgaria	BGR	Aquaculture	Rainbow trout	Rainbow trout	Europe - Inland waters	Freshwater fish	Oncorhynchus mykiss (Walbaum, 1792)	Rainbow trout	4.1	61258.4	123	151	92	117	126	194	272	1438	1000	1178	1333	1514	1554	1455	700	686	735	712	700	650	585	740	550	440	380	844	22	47	1175	1151	1553	1675	1805	2376.5	2908.7	1534.8	2167.7	3042.3	3311.8
Bulgaria	BGR	Aquaculture	Sea trout	Sea trout	Europe - Inland waters	Freshwater fish	Salmo trutta Linnaeus, 1758	Sea trout	3.4	236.77	0	0	0	0	0	0	0	0	0	0	0	0	0	0	0	0	0	0	0	0	0	0	0	0	0	0	0	0	0	2	6	3	5	19.05	17.75	17.42	34.59	23.8	10.4
Bulgaria	BGR	Aquaculture	Siberian sturgeon	Siberian sturgeon	Europe - Inland waters	Freshwater fish	Acipenser baerii Brandt, 1869	Siberian sturgeon	3.3	499.13	0	0	0	0	0	0	0	0	0	0	0	0	0	0	0	0	0	0	0	0	0	0	0	0	0	0	0	0	0	9	0	0	0	0	0	18.56	13.67	8.16	19.6
Bulgaria	BGR	Aquaculture	Silver carp	Silver carp	Europe - Inland waters	Freshwater fish	Hypophthalmichthys molitrix (Valenciennes, 1844)	Silver carp	2	2041.97	0	0	0	0	0	0	0	0	0	0	0	0	0	0	0	0	0	0	0	0	0	0	0	0	0	0	0	0	10	10	5	6	31	46.09	28.52	93	77.65	70.04	142.16
Bulgaria	BGR	Aquaculture	Sturgeons nei	Sturgeon	Europe - Inland waters	Freshwater fish	A37	Sturgeon	3.48182	269.76	0	0	0	0	0	0	0	0	0	0	0	0	0	0	0	0	0	0	0	0	0	0	0	0	0	0	0	0	0	10	0	0	0	0	0	0	0	0	0
Bulgaria	BGR	Aquaculture	Wels(=Som) catfish	Wels catfish	Europe - Inland waters	Freshwater fish	Silurus glanis Linnaeus, 1758	Wels catfish	4.4	3685.96	0	0	0	0	0	0	0	0	0	0	0	0	0	0	0	0	0	0	0	0	0	0	150	1364	65	13	56	71	13	26	18	48	75	109.37	87.22	78.19	75.71	164.85	122.4
Burkina Faso	BFA	Capture	Aba	Aba	Africa - Inland waters	Freshwater fish	Gymnarchus niloticus Cuvier, 1829	Aba	3.7	4936	0	0	0	0	0	0	0	0	0	0	0	0	0	0	0	0	0	0	0	0	0	0	0	0	0	0	0	0	0	0	0	0	0	0	0	402	508	513	518
Burkina Faso	BFA	Capture	African bonytongue	African bonytongue	Africa - Inland waters	Freshwater fish	Heterotis niloticus (Cuvier, 1829)	African bonytongue	2.7	5924	0	0	0	0	0	0	0	0	0	0	0	0	0	0	0	0	0	0	0	0	0	0	0	0	0	0	0	0	0	0	0	0	0	0	0	482	609	615	621
Burkina Faso	BFA	Capture	Naked catfishes	Catfish	Africa - Inland waters	Freshwater fish	C171	Catfish	4	4932	0	0	0	0	0	0	0	0	0	0	0	0	0	0	0	0	0	0	0	0	0	0	0	0	0	0	0	0	0	0	0	0	0	0	0	400	506	512	516
Burkina Faso	BFA	Capture	Freshwater fishes nei	Freshwater fish	Africa - Inland waters	Freshwater fish	Weighted mean	Freshwater fish	2.56413	265144	6000	6000	7000	7000	6500	7500	7000	7100	7300	7400	7600	7800	7900	8000	7000	7000	7500	7000	8000	8000	8000	8000	8335	7600	8500	8500	8500	9000	9000	9000	9500	10200	3943	3500	5020	321	406	410	414
Burkina Faso	BFA	Capture	Characins nei	Leporinus	Africa - Inland waters	Freshwater fish	C31	Leporinus	2.93333	2729	0	0	0	0	0	0	0	0	0	0	0	0	0	0	0	0	0	0	0	0	0	0	0	0	0	0	0	0	0	0	0	0	779	900	1050	0	0	0	0
Burkina Faso	BFA	Capture	Nile perch	Nile perch	Africa - Inland waters	Freshwater fish	Lates niloticus (Linnaeus, 1758)	Nile perch	4.5	9870	0	0	0	0	0	0	0	0	0	0	0	0	0	0	0	0	0	0	0	0	0	0	0	0	0	0	0	0	0	0	0	0	0	0	0	803	1015	1025	1035
Burkina Faso	BFA	Capture	Cichlids nei	Nile tilapia	Africa - Inland waters	Freshwater fish	Oreochromis niloticus (Linnaeus, 1758)	Nile tilapia	2	27627	0	0	0	0	0	0	0	0	0	0	0	0	0	0	0	0	0	0	0	0	0	0	0	0	0	0	0	0	0	0	0	0	0	0	0	2248	2842	2870	2898
Burkina Faso	BFA	Capture	Torpedo-shaped catfishes nei	North African catfish	Africa - Inland waters	Freshwater fish	Clarias gariepinus (Burchell, 1822)	North African catfish	3.8	19734	0	0	0	0	0	0	0	0	0	0	0	0	0	0	0	0	0	0	0	0	0	0	0	0	0	0	0	0	0	0	0	0	0	0	0	1606	2030	2050	2070
Burkina Faso	BFA	Capture	Nurse tetra	Nurse tetra	Africa - Inland waters	Freshwater fish	Brycinus nurse (Rüppell, 1832)	Nurse tetra	2.5	2467	0	0	0	0	0	0	0	0	0	0	0	0	0	0	0	0	0	0	0	0	0	0	0	0	0	0	0	0	0	0	0	0	0	0	0	201	254	256	259
Burkina Faso	BFA	Capture	Freshwater siluroids nei	Silver catfish	Africa - Inland waters	Freshwater fish	Schilbe intermedius Rüppell, 1832	Silver catfish	3.6	8129	0	0	0	0	0	0	0	0	0	0	0	0	0	0	0	0	0	0	0	0	0	0	0	0	0	0	0	0	0	0	0	0	2329	2700	3100	0	0	0	0
Burkina Faso	BFA	Capture	[Alestes baremoze]	Silversides	Africa - Inland waters	Freshwater fish	Alestes baremoze (Joannis, 1835)	Silversides	3.1	2467	0	0	0	0	0	0	0	0	0	0	0	0	0	0	0	0	0	0	0	0	0	0	0	0	0	0	0	0	0	0	0	0	0	0	0	201	254	256	259
Burkina Faso	BFA	Capture	Tilapias nei	Tilapia	Africa - Inland waters	Freshwater fish	C289	Tilapia	2.1375	124605	0	0	0	0	0	0	0	0	0	0	0	0	0	0	0	0	0	0	0	0	0	0	0	0	0	0	0	0	0	0	0	0	4042	4700	5350	8994	11368	11480	11592
Burkina Faso	BFA	Capture	Upsidedown catfishes	Upsidedown catfish	Africa - Inland waters	Freshwater fish	Synodontis batensoda Rüppell, 1832	Upsidedown catfish	2.8	4936	0	0	0	0	0	0	0	0	0	0	0	0	0	0	0	0	0	0	0	0	0	0	0	0	0	0	0	0	0	0	0	0	0	0	0	402	508	513	518
Burkina Faso	BFA	Aquaculture	Nile tilapia	Nile tilapia	Africa - Inland waters	Freshwater fish	Oreochromis niloticus (Linnaeus, 1758)	Nile tilapia	2	3518	0	0	0	0	0	0	0	114	74	33	30	26	7	3	3	2	2	0	0	0	30	45	40	25	5	5	5	5	5	50	190	290	400	180	180	161	163	148	143
Burkina Faso	BFA	Aquaculture	North African catfish	North African catfish	Africa - Inland waters	Freshwater fish	Clarias gariepinus (Burchell, 1822)	North African catfish	3.8	692	0	0	0	0	0	0	0	0	0	0	0	0	0	0	0	0	0	0	0	0	0	0	0	0	0	0	0	0	0	5	10	8	5	5	10	30	30	44	50
Burundi	BDI	Capture	[Bathybates minor]	/	Africa - Inland waters	Freshwater fish	Bathybates minor Boulenger, 1906	/	4.2	640	0	0	0	0	0	0	0	0	0	0	0	0	0	0	0	0	0	0	0	0	0	0	0	0	0	0	0	0	0	0	2	1	3	72	36	5	108	37	51
Burundi	BDI	Capture	[Chrysichthys sianenna]	/	Africa - Inland waters	Freshwater fish	Bathybagrus sianenna (Boulenger, 1906)	/	3.7	506	0	0	0	0	0	0	0	0	0	0	0	0	0	0	0	0	0	0	0	0	0	0	0	0	0	0	0	0	0	0	45	47	97	7	1	38	24	22	28
Burundi	BDI	Capture	[Chrysichthys stappersii]	/	Africa - Inland waters	Freshwater fish	Chrysichthys stappersii	/	3.3	130	0	0	0	0	0	0	0	0	0	0	0	0	0	0	0	0	0	0	0	0	0	0	0	0	0	0	0	0	0	0	6	24	20	1	0	3	7	6	8
Burundi	BDI	Capture	[Hemibates stenosoma]	/	Africa - Inland waters	Freshwater fish	Hemibates stenosoma (Boulenger, 1901)	/	4.1	2013	0	0	0	0	0	0	0	0	0	0	0	0	0	0	0	0	0	0	0	0	0	0	0	0	0	0	0	0	0	0	54	37	166	82	101	78	145	106	181
Burundi	BDI	Capture	[Limnotilapia dardennii]	/	Africa - Inland waters	Freshwater fish	Limnotilapia dardennii (Boulenger, 1899)	/	3.2	886	0	0	0	0	0	0	0	0	0	0	0	0	0	0	0	0	0	0	0	0	0	0	0	0	0	0	0	0	0	0	87	66	120	32	140	14	63	35	24
Burundi	BDI	Capture	African bullhead	African bullhead	Africa - Inland waters	Freshwater fish	Lophiobagrus cyclurus (Worthington & Ricardo, 1937)	African bullhead	3.3	131	0	0	0	0	0	0	0	0	0	0	0	0	0	0	0	0	0	0	0	0	0	0	0	0	0	0	0	0	0	0	1	3	1	0	0	0	4	6	19
Burundi	BDI	Capture	Bigeye lates	Bigeye lates	Africa - Inland waters	Freshwater fish	Lates mariae Steindachner, 1909	Bigeye lates	4.2	298	0	0	0	0	0	0	0	0	0	0	0	0	0	0	0	0	0	0	0	0	0	0	0	0	0	0	0	0	0	0	13	10	3	10	6	48	31	12	10
Burundi	BDI	Capture	Electric catfish	Electric catfish	Africa - Inland waters	Freshwater fish	Malapterurus electricus (Gmelin, 1789)	Electric catfish	2.9	128	0	0	0	0	0	0	0	0	0	0	0	0	0	0	0	0	0	0	0	0	0	0	0	0	0	0	0	0	0	0	0	0	4	0	0	0	4	4	16
Burundi	BDI	Capture	Forktail lates	Forktail lates	Africa - Inland waters	Freshwater fish	Lates microlepis Boulenger, 1898	Forktail lates	4.4	626	0	0	0	0	0	0	0	0	0	0	0	0	0	0	0	0	0	0	0	0	0	0	0	0	0	0	0	0	0	0	9	6	8	1	6	31	34	6	90
Burundi	BDI	Capture	Freshwater fishes nei	Freshwater fish	Africa - Inland waters	Freshwater fish	Weighted mean	Freshwater fish	2.75674	65662	0	0	0	0	0	5000	4000	5000	5000	6000	5000	7000	5000	4062	1000	1046	1146	870	1100	0	278	0	805	596	3286	1049	1000	294	276	860	541	644	853	357	392	291	450	287	234
Burundi	BDI	Capture	Giant cichlid	Giant cichlid	Africa - Inland waters	Freshwater fish	Boulengerochromis microlepis (Boulenger, 1899)	Giant cichlid	4.5	600	0	0	0	0	0	0	0	0	0	0	0	0	0	0	0	0	0	0	0	0	0	0	0	0	0	0	0	0	0	0	22	12	18	30	30	17	107	55	36
Burundi	BDI	Capture	Lake Tanganyika sardine	Lake Tanganyika sardine	Africa - Inland waters	Freshwater fish	Limnothrissa miodon (Boulenger, 1906)	Lake Tanganyika sardine	1.6	2299	0	0	0	0	0	0	0	0	0	0	0	0	0	0	0	0	0	0	0	0	0	0	0	0	0	0	0	0	0	0	124	21	81	86	159	117	61	77	189
Burundi	BDI	Capture	Dagaas (=Kapenta)	Lake Tanganyika sprat	Africa - Inland waters	Freshwater fish	Stolothrissa tanganicae Regan, 1917	Lake Tanganyika sprat	2.7	320554	14327	13320	11169	8181	9303	4820	5690	4460	4450	3760	5548	3379	5169	5200	14453	17745	19990	14100	18200	18163	1508	17868	8646	7030	10839	6138	8400	13080	8876	750	952	1427	1912	1043	2208	866	630	2548	3589
Burundi	BDI	Capture	Lake Tanganyika sprat	Lake Tanganyika sprat	Africa - Inland waters	Freshwater fish	Stolothrissa tanganicae Regan, 1917	Lake Tanganyika sprat	2.7	130653	0	0	0	0	0	0	0	0	0	0	0	0	0	0	0	0	0	0	0	0	0	0	0	0	0	0	0	0	0	8600	9422	6141	11510	8346	11650	7264	9731	7410	8833
Burundi	BDI	Capture	Marbled lungfish	Marbled lungfish	Africa - Inland waters	Freshwater fish	Protopterus aethiopicus Heckel, 1851	Marbled lungfish	4.4	109	0	0	0	0	0	0	0	0	0	0	0	0	0	0	0	0	0	0	0	0	0	0	0	0	0	0	0	0	0	0	0	0	5	0	0	0	0	0	14
Burundi	BDI	Capture	Nile tilapia	Nile tilapia	Africa - Inland waters	Freshwater fish	Oreochromis niloticus (Linnaeus, 1758)	Nile tilapia	2	3811	1026	950	0	105	0	0	0	0	0	0	102	145	91	100	20	60	40	30	50	50	50	50	50	50	120	120	100	0	60	40	12	10	20	23	41	24	44	28	15
Burundi	BDI	Capture	North African catfish	North African catfish	Africa - Inland waters	Freshwater fish	Clarias gariepinus (Burchell, 1822)	North African catfish	3.8	158	0	0	0	0	0	0	0	0	0	0	0	0	0	0	0	0	0	0	0	0	0	0	0	0	0	0	0	0	0	0	6	2	4	1	2	1	8	58	10
Burundi	BDI	Capture	Freshwater perches nei	Perch	Africa - Inland waters	Freshwater fish	Distichodus engycephalus Günther, 1864	Perch	2	76844	4980	4630	4513	2964	5464	2060	2441	1906	1911	1609	1190	1485	1417	1400	1922	2143	2897	2000	2650	2888	1205	2378	3925	1523	3070	1657	1500	1323	4643	3150	0	0	0	0	0	0	0	0	0
Burundi	BDI	Capture	Sleek lates	Sleek lates	Africa - Inland waters	Freshwater fish	Lates stappersii (Boulenger, 1914)	Sleek lates	4.3	52998	0	0	0	0	0	0	0	0	0	0	0	0	0	0	0	0	0	0	0	0	0	0	0	0	0	0	0	0	0	0	1671	2841	3420	2515	2499	1849	843	2518	2673
Burundi	BDI	Aquaculture	Nile tilapia	Nile tilapia	Africa - Inland waters	Freshwater fish	Oreochromis niloticus (Linnaeus, 1758)	Nile tilapia	2	9331.4	0	0	0	0	0	0	0	0	2	2	21	25	24	25	30	50	48	48	48	48	48	48	48	48	48	48	48	48	48	48	48	48	48	48	15.3	59.7	158.4	380	800
Burundi	BDI	Aquaculture	North African catfish	North African catfish	Africa - Inland waters	Freshwater fish	Clarias gariepinus (Burchell, 1822)	North African catfish	3.8	423	0	0	0	0	0	0	0	0	0	0	0	0	0	0	0	0	2	2	2	2	2	2	2	2	2	2	2	2	2	2	2	2	2	2	2	2	2	5	5
Cambodia	KHM	Capture	Cephalopods nei	Cephalopod	Pacific, Western Central	Cephalopod	Cephalopod	Cephalopod	3	85934	0	0	0	0	0	0	0	0	0	0	0	0	0	0	0	0	0	0	0	0	0	0	0	0	0	2200	2400	2800	2850	3000	3000	3000	2930	3115	3956	5504	6700	7000	9470
Cambodia	KHM	Capture	Marine crabs nei	Crab	Pacific, Western Central	Crustacean	Crustacean	Crustacean	2.5	133672	200	200	200	150	20	14	55	174	127	204	514	1909	1260	1428	2499	2421	2270	2300	2200	2300	2350	2240	2420	2850	3593	3500	3800	4600	4700	5100	5100	4800	4580	5013	4558	4230	5500	5700	8210
Cambodia	KHM	Capture	Freshwater crustaceans nei	Crustacean	Asia - Inland waters	Crustacean	Crustacean	Crustacean	2.5	11847	100	100	100	100	100	200	200	200	67	30	23	3	45	23	19	28	19	20	40	80	70	100	100	300	300	500	500	500	400	500	600	500	400	300	400	500	500	600	575
Cambodia	KHM	Capture	Freshwater fishes nei	Freshwater fish	Asia - Inland waters	Freshwater fish	Weighted mean	Freshwater fish	2.82125	9950299	73800	73800	30000	21900	18300	50340	65036	57583	55026	56370	64181	62154	61155	50477	65081	74672	68881	67880	64960	72420	63440	72900	75600	230700	245300	384500	359800	308250	249600	323500	421400	394500	364600	389700	404600	444500	448500	527400	504430
Cambodia	KHM	Capture	Marine fishes nei	Marine fish	Pacific, Western Central	Marine fish	Weighted mean (Seas)	Marine fish	4.02652	1648854	10200	10200	10200	7550	1130	770	2850	8920	7224	10364	6163	14468	17995	19947	28859	26891	23825	24835	22400	22455	22958	21928	23701	28070	26585	26500	28550	33747	34330	37000	37400	41500	45345	55460	64009	91000	87000	80000	79426
Cambodia	KHM	Capture	Natantian decapods nei	Shrimp	Pacific, Western Central	Crustacean	Crustacean	Crustacean	2.5	261566	400	400	400	300	50	30	110	350	270	410	270	640	1222	2245	5881	3955	4593	4500	4000	4200	4300	4110	4440	5250	5000	8800	10000	12300	12600	13500	13600	12400	11040	7060	7761	8726	9400	9500	10966
Cambodia	KHM	Capture	Argentine shortfin squid	Squid	Atlantic, Southwest	Cephalopod	Cephalopod	Cephalopod	3	9275	0	0	0	0	0	0	0	0	0	0	0	0	0	0	0	0	0	0	0	0	0	0	0	0	2768	1200	32	857	17	0	0	0	0	0	94	1144	1695	1468	0
Cambodia	KHM	Aquaculture	Asian swamp eel	Asian swamp eel	Asia - Inland waters	Freshwater fish	Monopterus albus (Zuiew, 1793)	Asian swamp eel	2.9	530	0	0	0	0	0	0	0	0	0	0	0	0	0	0	0	0	0	0	0	0	0	0	0	0	0	0	0	0	0	0	0	0	40	40	40	40	40	40	40
Cambodia	KHM	Aquaculture	Barramundi(=Giant seaperch)	Barramundi	Pacific, Western Central	Marine fish	Lates calcarifer (Bloch, 1790)	Barramundi	3.8	4680	0	0	0	0	0	0	0	0	0	0	0	0	0	0	0	0	0	0	0	0	0	0	0	0	0	0	0	0	0	0	0	0	80	100	120	140	140	150	200
Cambodia	KHM	Aquaculture	Bighead carp	Bighead carp	Asia - Inland waters	Freshwater fish	Hypophthalmichthys nobilis (Richardson, 1845)	Bighead carp	2.8	8107	0	0	0	0	0	6	14	29	50	100	70	80	150	185	210	220	285	250	255	290	300	380	410	470	460	439	461	583	400	300	300	200	50	70	80	100	100	100	100
Cambodia	KHM	Aquaculture	Climbing perch	Climbing perch	Asia - Inland waters	Freshwater fish	Anabas testudineus (Bloch, 1792)	Climbing perch	3	14900	0	0	0	0	0	0	0	0	0	0	0	0	0	0	0	0	0	0	0	0	0	0	0	0	0	0	0	0	0	0	0	0	500	600	700	850	900	1000	1300
Cambodia	KHM	Aquaculture	Common carp	Common carp	Asia - Inland waters	Freshwater fish	Cyprinus carpio Linnaeus, 1758	Common carp	3.1	81964	2	5	10	15	30	70	150	270	460	860	630	720	1320	1590	1840	1920	2450	2120	2190	2520	2580	3310	3600	4090	4000	3852	4043	5117	2000	1600	1000	1000	900	1230	1400	1650	1700	2000	2200
Cambodia	KHM	Aquaculture	Cyprinids nei	Carp	Asia - Inland waters	Freshwater fish	A13	Carp	2.73333	177630	0	0	0	0	0	0	0	0	0	0	0	0	0	0	0	0	0	0	0	0	0	0	0	0	0	0	0	0	3000	3500	3900	3800	3630	4565	5600	6840	6800	8740	13075
Cambodia	KHM	Aquaculture	Freshwater siluroids nei	Channel catfish	Asia - Inland waters	Freshwater fish	Ictalurus punctatus (Rafinesque, 1818)	Channel catfish	4.2	32506	0	0	0	1	8	15	25	45	80	130	95	110	200	240	280	290	370	320	330	380	390	500	540	618	602	573	602	762	3000	6000	8000	8000	0	0	0	0	0	0	0
Cambodia	KHM	Aquaculture	Giant river prawn	Prawn	Asia - Inland waters	Crustacean	Crustacean	Crustacean	2.5	1610	0	0	0	0	0	0	0	0	0	0	0	0	0	0	0	0	0	0	0	0	0	0	0	0	0	0	0	0	0	0	0	0	30	110	120	140	140	140	150
Cambodia	KHM	Aquaculture	Grass carp(=White amur)	Grass carp	Asia - Inland waters	Freshwater fish	Ctenopharyngodon idella (Valenciennes, 1844)	Grass carp	2	15465	0	0	0	4	8	16	36	56	100	190	140	160	290	350	405	420	540	470	485	560	575	740	800	910	900	860	903	1142	500	500	400	200	100	120	140	170	190	200	250
Cambodia	KHM	Aquaculture	Hoven's carp	Hoven's carp	Asia - Inland waters	Freshwater fish	Leptobarbus hoevenii (Bleeker, 1851)	Hoven's carp	2.8	43271	0	0	0	0	0	4	10	22	40	80	60	70	120	150	170	180	230	200	205	230	240	310	340	390	380	367	385	488	500	600	1000	1000	1000	1250	1500	1800	1900	2300	3100
Cambodia	KHM	Aquaculture	Indo-Pacific swamp crab	Crab	Pacific, Western Central	Crustacean	Crustacean	Crustacean	2.5	563	0	0	0	0	0	0	0	0	0	0	0	0	0	0	0	0	0	0	0	0	0	0	0	0	0	0	0	0	0	0	0	0	15	20	20	20	40	40	50
Cambodia	KHM	Aquaculture	Marine fishes nei	Marine fish	Pacific, Western Central	Marine fish	Weighted mean	Marine fish	3.93287	1319	0	0	0	0	0	0	0	0	0	0	0	0	0	0	0	0	0	0	0	0	0	0	0	0	0	0	0	0	0	0	0	0	25	40	60	80	90	100	150
Cambodia	KHM	Aquaculture	Mozambique tilapia	Mozambique tilapia	Asia - Inland waters	Freshwater fish	Oreochromis mossambicus (Peters, 1852)	Mozambique tilapia	2.2	4056	0	0	0	0	0	2	8	18	30	60	40	50	90	110	130	130	170	150	150	170	170	220	240	270	270	260	273	345	300	200	100	100	0	0	0	0	0	0	0
Cambodia	KHM	Aquaculture	Nile tilapia	Nile tilapia	Asia - Inland waters	Freshwater fish	Oreochromis niloticus (Linnaeus, 1758)	Nile tilapia	2	52153	0	0	0	0	0	0	1	6	10	20	15	20	30	40	40	50	60	50	50	60	60	80	90	100	100	99	103	131	200	200	500	700	1150	1450	1700	2000	2100	2500	3500
Cambodia	KHM	Aquaculture	Orange-spotted grouper	Orange-spotted grouper	Pacific, Western Central	Marine fish	Epinephelus coioides (Hamilton, 1822)	Orange-spotted grouper	4	2520	0	0	0	0	0	0	0	0	0	0	0	0	0	0	0	0	0	0	0	0	0	0	0	0	0	0	0	0	0	0	0	0	80	100	120	140	140	150	200
Cambodia	KHM	Aquaculture	Pangas catfishes nei	Pangas catfish	Asia - Inland waters	Freshwater fish	Pangasius pangasius (Hamilton, 1822)	Pangas catfish	3.4	449650	0	0	0	0	0	0	0	0	0	0	0	0	0	0	0	0	0	0	0	0	0	0	0	0	0	0	0	0	3000	5000	8000	9000	14450	14600	15200	16400	12600	15900	26500
Cambodia	KHM	Aquaculture	Penaeus shrimps nei	Shrimp	Pacific, Western Central	Crustacean	Crustacean	Crustacean	2.5	8762	0	0	0	0	0	0	0	0	0	0	0	0	0	0	0	0	0	500	560	731	600	266	197	62	20	143	53	90	75	110	40	70	75	75	80	100	120	120	120
Cambodia	KHM	Aquaculture	Philippine catfish	Philippine catfish	Asia - Inland waters	Freshwater fish	Clarias batrachus (Linnaeus, 1758)	Philippine catfish	3.4	8690	0	0	0	2	5	8	10	35	60	110	80	90	170	200	235	250	310	270	280	320	330	420	460	510	500	484	508	643	600	600	600	600	0	0	0	0	0	0	0
Cambodia	KHM	Aquaculture	Silver barb	Silver barb	Asia - Inland waters	Freshwater fish	Barbonymus gonionotus (Bleeker, 1849)	Silver barb	2.4	359840	2	6	12	25	45	94	170	358	620	1150	850	950	1770	2123	2450	2570	3280	2830	2930	3370	3455	4424	4845	5500	5390	5186	5445	6890	5700	6000	7000	7000	7000	8750	10500	12600	13000	15800	21000
Cambodia	KHM	Aquaculture	Silver carp	Silver carp	Asia - Inland waters	Freshwater fish	Hypophthalmichthys molitrix (Valenciennes, 1844)	Silver carp	2	22152	0	0	3	6	10	25	40	95	160	300	220	250	460	550	640	670	855	740	765	880	900	1150	1260	1430	1400	1343	1410	1785	700	500	500	300	100	120	140	170	190	200	250
Cambodia	KHM	Aquaculture	Snakeskin gourami	Snakeskin gourami	Asia - Inland waters	Freshwater fish	Trichopodus pectoralis Regan, 1910	Snakeskin gourami	2.8	119000	0	0	0	0	0	0	0	0	0	0	0	0	0	0	0	0	0	0	0	0	0	0	0	0	0	0	0	0	0	0	0	0	4100	5100	6100	7300	7500	9000	10000
Cambodia	KHM	Aquaculture	Snappers nei	Snapper	Pacific, Western Central	Marine fish	A34	Snapper	4.1125	2520	0	0	0	0	0	0	0	0	0	0	0	0	0	0	0	0	0	0	0	0	0	0	0	0	0	0	0	0	0	0	0	0	80	100	120	140	140	150	200
Cambodia	KHM	Aquaculture	Striped snakehead	Striped snakehead	Asia - Inland waters	Freshwater fish	Channa striata (Bloch, 1793)	Striped snakehead	3.6	361400	0	0	0	0	0	0	0	0	0	0	0	0	0	0	0	0	0	0	0	0	0	0	0	0	0	0	0	0	0	0	1500	2000	4100	8500	12900	17300	21700	26100	30500
Cambodia	KHM	Aquaculture	Torpedo-shaped catfishes nei	Catfish	Asia - Inland waters	Freshwater fish	A41	Catfish	3.95	40300	0	0	0	0	0	0	0	0	0	0	0	0	0	0	0	0	0	0	0	0	0	0	0	0	0	0	0	0	0	0	0	0	1150	1400	1600	1950	2100	2500	3500
Cameroon	CMR	Capture	African moonfish	African moonfish	Atlantic, Eastern Central	Marine fish	Selene dorsalis (Gill, 1863)	African moonfish	4.1	576	0	0	0	0	0	0	0	0	0	0	0	0	0	0	0	0	0	0	0	0	0	0	0	0	0	0	0	0	0	0	0	0	0	0	0	0	0	0	0
Cameroon	CMR	Capture	African sicklefish	African sicklefish	Atlantic, Eastern Central	Marine fish	Drepane africana Osório, 1892	African sicklefish	3.1	13585	265	334	287	290	295	306	285	266	213	186	147	174	174	93	93	90	96	39	50	111	72	75	78	94	73	70	30	42	30	13	24	24	140	260	380	0	620	740	860
Cameroon	CMR	Capture	Carangids nei	Amberjack, jack, trevally, scad, pompano	Atlantic, Eastern Central	Marine fish	C23	Amberjack and jack and trevally and scad and pompano	3.9	7446	356	477	309	312	318	135	128	115	93	65	62	28	28	18	18	18	30	5	5	6	5	5	2	2	4	5	7	10	40	74	74	74	50	26	200	350	500	650	800
Cameroon	CMR	Capture	Angelsharks, sand devils nei	Angelshark	Atlantic, Eastern Central	Marine fish	Squatina squatina (Linnaeus, 1758)	Angelshark	4.1	1323	0	0	0	0	0	0	0	0	0	0	0	0	0	0	0	0	0	0	0	0	0	0	0	0	0	0	0	0	0	0	0	0	0	0	0	0	0	0	0
Cameroon	CMR	Capture	Atlantic bonito	Atlantic bonito	Atlantic, Eastern Central	Marine fish	Sarda sarda (Bloch, 1793)	Atlantic bonito	4.5	233.93	0	0	0	0	0	0	0	0	0	0	0	0	0	0	0	0	0	0	0	0	0	0	0	0	0	0	0	0	0	0	0	0	0	0	0	0	0	0	0
Cameroon	CMR	Capture	Atlantic bumper	Atlantic bumper	Atlantic, Eastern Central	Marine fish	Chloroscombrus chrysurus (Linnaeus, 1766)	Atlantic bumper	3.5	288	0	0	0	0	0	0	0	0	0	0	0	0	0	0	0	0	0	0	0	0	0	0	0	0	0	0	0	0	0	0	0	0	0	0	0	0	0	0	0
Cameroon	CMR	Capture	Atlantic emperor	Atlantic emperor	Atlantic, Eastern Central	Marine fish	Lethrinus atlanticus Valenciennes, 1830	Atlantic emperor	3.5	1919	0	0	0	0	0	0	0	0	0	0	0	0	0	0	0	0	0	0	0	0	0	0	0	0	0	0	0	0	0	0	0	0	0	0	0	0	0	0	0
Cameroon	CMR	Capture	Barracudas nei	Barracuda	Atlantic, Eastern Central	Marine fish	C11	Barracuda	4.46667	72676.9	60	76	65	65	66	10	176	82	55	37	36	43	43	25	25	24	30	16	20	27	37	30	5	28	23	293	340	583	580	580	580	580	1400	2200	3000	3850	4700	5500	6300
Cameroon	CMR	Capture	Bigeye grunt	Bigeye grunt	Atlantic, Eastern Central	Marine fish	Brachydeuterus auritus (Valenciennes, 1832)	Bigeye grunt	3	72898	4695	5681	5893	5913	6041	7285	5950	4188	4495	3631	2657	3342	3342	3291	3291	3200	0	0	0	0	0	0	0	0	0	0	0	0	0	0	0	0	0	0	0	0	0	0	0
Cameroon	CMR	Capture	Ribbonfishes	Blackflash ribbonfish	Atlantic, Eastern Central	Marine fish	Trachipterus jacksonensis (Ramsay, 1881)	Blackflash ribbonfish	3.6	16434	0	0	0	0	0	0	0	0	0	0	0	0	0	0	0	0	0	0	0	0	0	0	0	0	0	0	0	0	0	0	0	0	0	0	0	0	0	0	0
Cameroon	CMR	Capture	Bobo croaker	Bobo croaker	Atlantic, Eastern Central	Marine fish	Pseudotolithus elongatus (Bowdich, 1825)	Bobo croaker	4.1	144392	1014	1020	2040	2045	2090	682	879	570	486	413	1104	1665	1665	140	140	136	4202	1005	3500	4436	4371	4400	4400	1900	3400	3218	1883	1453	2000	2438	26	26	36	46	1600	3200	4800	6400	8000
Cameroon	CMR	Capture	Bonga shad	Bonga shad	Atlantic, Eastern Central	Marine fish	Ethmalosa fimbriata (Bowdich, 1825)	Bonga shad	2.5	1553056	15000	15000	15000	18000	18000	18000	18000	18000	18000	18000	18000	18000	18000	18000	18000	17480	16000	16000	18600	24000	24000	23500	23000	23500	21609	21645	21782	20226	30800	41699	41593	41493	46000	51000	55500	60000	64500	69000	73500
Cameroon	CMR	Capture	Frigate and bullet tunas	Bullet tuna	Atlantic, Eastern Central	Marine fish	Auxis rochei (Risso, 1810)	Bullet tuna	4.4	1255	0	0	0	0	0	0	0	0	0	0	0	0	0	0	0	0	0	0	0	0	0	0	0	0	0	0	0	0	0	0	0	0	0	0	0	0	0	0	0
Cameroon	CMR	Capture	Canary drum(=Baardman)	Canary drum	Atlantic, Eastern Central	Marine fish	Umbrina canariensis Valenciennes, 1843	Canary drum	3.4	200	0	0	0	0	0	0	0	0	0	0	0	0	0	0	0	0	0	0	0	0	0	0	0	0	0	0	0	0	0	0	0	0	0	0	0	0	0	0	0
Cameroon	CMR	Capture	Cassava croaker	Cassava croaker	Atlantic, Eastern Central	Marine fish	Pseudotolithus senegalensis (Valenciennes, 1833)	Cassava croaker	3.8	32442	0	0	0	0	0	0	0	0	0	0	0	0	0	0	0	0	0	0	0	2686	2540	2600	2900	3200	1972	2679	2100	1263	900	431	55	55	500	921	865	810	755	700	645
Cameroon	CMR	Capture	Conger eels, etc. nei	Conger eel	Atlantic, Eastern Central	Marine fish	C36	Conger eel	4.1	821	48	53	38	38	39	65	93	35	16	9	8	6	6	35	35	34	13	14	10	5	6	6	5	5	8	7	11	16	10	1	1	1	4	7	10	13	16	19	22
Cameroon	CMR	Capture	Marine crabs nei	Crab	Atlantic, Eastern Central	Crustacean	Crustacean	Crustacean	2.5	68048	19	35	27	27	27	32	62	26	24	18	30	22	22	20	20	19	42	40	40	32	18	20	20	20	27	26	20	1	1	1	1	1	800	1600	2400	3200	4000	4800	5600
Cameroon	CMR	Capture	Crevalle jack	Crevalle jack	Atlantic, Eastern Central	Marine fish	Caranx hippos (Linnaeus, 1766)	Crevalle jack	3.6	576	0	0	0	0	0	0	0	0	0	0	0	0	0	0	0	0	0	0	0	0	0	0	0	0	0	0	0	0	0	0	0	0	0	0	0	0	0	0	0
Cameroon	CMR	Capture	West African croakers nei	Croaker	Atlantic, Eastern Central	Marine fish	C318	Croaker	3.78571	144649	101	73	106	106	109	41	62	0	18	9	9	14	14	10	10	10	5	0	0	0	0	0	0	0	0	0	0	0	0	0	0	0	500	1000	3500	6000	8500	11000	13500
Cameroon	CMR	Capture	Croakers, drums nei	Croaker, drum	Atlantic, Eastern Central	Marine fish	C41	Croaker and drum	4.03333	119383	7996	5664	4651	6669	6770	6543	8803	6522	5333	4740	3673	2363	2363	2623	2623	2560	6046	2300	3000	3679	3539	3500	3500	3500	3260	2399	1946	1564	800	40	24	24	24	24	30	35	40	45	50
Cameroon	CMR	Capture	Flatfishes nei	Flatfish	Atlantic, Eastern Central	Marine fish	C61	Flatfish	3.7	28175	0	0	0	0	0	0	0	0	0	0	0	0	0	0	0	0	0	0	0	0	0	0	0	0	0	0	0	0	0	0	0	0	500	1000	1700	2400	3100	3800	4500
Cameroon	CMR	Capture	Flyingfishes nei	Flyingfish	Atlantic, Eastern Central	Marine fish	C73	Flyingfish	3.36667	239	0	0	0	0	0	0	0	0	0	0	0	0	0	0	0	0	0	0	0	0	0	0	0	0	0	0	0	0	0	0	0	0	0	0	0	0	0	0	0
Cameroon	CMR	Capture	Freshwater fishes nei	Freshwater fish	Africa - Inland waters	Freshwater fish	Weighted mean	Freshwater fish	2.90538	1687493	20000	20000	20000	20000	20000	20000	20000	20000	20000	20000	20000	20000	20000	21000	22000	22000	22000	23000	27000	30000	35000	40000	45000	50000	55000	52500	65000	55000	65000	75000	75000	74380	74700	75000	68000	61000	54000	47000	40000
Cameroon	CMR	Capture	Giant African threadfin	Giant African threadfin	Atlantic, Eastern Central	Marine fish	Polydactylus quadrifilis (Cuvier, 1829)	Giant African threadfin	4	5884	0	0	0	450	450	377	281	451	421	745	114	148	148	0	0	0	69	39	50	76	54	40	12	34	43	170	75	106	160	216	109	109	75	42	70	100	125	150	175
Cameroon	CMR	Capture	Goatfishes, red mullets nei	Goatfish, red mullet	Atlantic, Eastern Central	Marine fish	C86	Goatfish and red mullet	3.26667	17716.8	0	0	0	0	0	0	0	0	0	0	0	0	0	0	0	0	0	0	0	0	0	0	0	0	0	0	0	0	0	0	0	0	0	0	0	0	0	0	0
Cameroon	CMR	Capture	Groupers nei	Grouper	Atlantic, Eastern Central	Marine fish	C95	Grouper	4.1	1125	33	35	37	38	39	12	89	18	9	7	17	2	2	1	1	1	3	1	1	2	0	0	1	0	1	1	1	1	15	54	3	3	19	35	41	47	53	59	64
Cameroon	CMR	Capture	Grunts, sweetlips nei	Grunt, sweetlips	Atlantic, Eastern Central	Marine fish	C96	Grunt and sweetlips	3.48	33709.5	0	0	0	0	0	0	243	182	164	130	45	68	68	0	0	0	21	17	0	0	0	0	0	0	0	0	0	0	0	0	0	0	650	900	1150	1400	1650	1900	2150
Cameroon	CMR	Capture	Jacks, crevalles nei	Jack	Atlantic, Eastern Central	Marine fish	C126	Jack	4.13333	4186	0	0	0	0	0	0	0	0	0	0	0	0	0	0	0	0	0	0	0	0	0	0	0	0	0	0	0	0	0	0	0	0	0	0	0	0	0	0	0
Cameroon	CMR	Capture	Largehead hairtail	Largehead hairtail	Atlantic, Eastern Central	Marine fish	Trichiurus lepturus Linnaeus, 1758	Largehead hairtail	4.4	31034	0	0	0	0	0	0	0	0	0	0	0	0	0	16	16	15	5	5	2	1	4	10	16	1	6	59	6	7	400	889	815	815	1300	1750	2200	2650	3100	3550	4000
Cameroon	CMR	Capture	Lesser African threadfin	Lesser African threadfin	Atlantic, Eastern Central	Marine fish	Galeoides decadactylus (Bloch, 1795)	Lesser African threadfin	3.6	16490	0	0	0	318	335	143	1099	1071	905	908	766	679	679	0	0	0	542	350	600	949	810	500	13	150	477	462	134	341	180	67	227	227	220	214	217	220	224	228	232
Cameroon	CMR	Capture	Tropical spiny lobsters nei	Lobster	Atlantic, Eastern Central	Crustacean	Crustacean	Crustacean	2.5	1211.64	7	8	4	4	4	0	1	1	1	1	0	1	1	4	4	4	1	0	1	0	0	0	1	1	0	0	1	1	1	1	1	1	15	30	43	56	69	82	95
Cameroon	CMR	Capture	Mackerels nei	Mackerel	Atlantic, Eastern Central	Marine fish	C149	Mackerel	3.96667	4007	0	0	0	0	0	0	0	0	0	0	0	0	0	0	0	0	0	0	0	0	0	0	0	0	0	0	0	0	0	0	0	0	0	0	0	0	0	0	0
Cameroon	CMR	Capture	Madeiran sardinella	Madeiran sardinella	Atlantic, Eastern Central	Marine fish	Sardinella maderensis (Lowe, 1838)	Madeiran sardinella	3.2	1581	0	0	0	0	0	0	0	0	0	0	0	0	0	0	0	0	0	0	0	0	0	0	0	0	0	0	0	0	0	0	0	0	0	0	0	0	0	0	0
Cameroon	CMR	Capture	Marine fishes nei	Marine fish	Atlantic, Eastern Central	Marine fish	Weighted mean	Marine fish	3.07195	154138	435	604	714	3000	3000	3000	3000	3000	3000	3000	3000	3000	3000	3034	3034	3033	3000	3000	3740	0	0	0	0	0	954	907	830	674	1800	2869	2869	2869	4933	9115	8628	8588	7612	6116	4761
Cameroon	CMR	Capture	Needlefishes, etc. nei	Needlefish	Atlantic, Eastern Central	Marine fish	C174	Needlefish	4.46667	993.58	0	0	0	0	0	0	0	0	0	0	0	0	0	0	0	0	0	0	0	0	0	0	0	0	0	0	0	0	0	0	0	0	0	0	0	0	0	0	0
Cameroon	CMR	Capture	Porgies, seabreams nei	Porgy, seabream	Atlantic, Eastern Central	Marine fish	C188	Porgy and seabream	3.55	11847.1	215	235	244	243	249	236	463	4	30	19	0	0	0	58	58	56	1	14	0	0	2	2	5	5	4	34	18	40	80	114	89	89	55	20	340	660	980	1300	1620
Cameroon	CMR	Capture	West African estuarine prawn	Prawn	Atlantic, Eastern Central	Crustacean	Crustacean	Crustacean	2.5	256537	0	0	0	0	0	0	0	0	0	0	0	0	0	0	0	0	0	0	0	0	0	0	0	0	0	10000	10000	10000	10000	11700	9750	11600	13300	15000	16800	18600	20400	22200	24000
Cameroon	CMR	Capture	Rays, stingrays, mantas nei	Ray, stingray, manta	Atlantic, Eastern Central	Marine fish	C205	Ray and stingray and manta	3.73333	25646.2	351	345	404	407	416	367	383	278	294	233	130	127	127	170	170	165	77	70	100	160	186	170	161	211	150	130	133	139	400	721	721	721	440	162	420	680	940	1200	1460
Cameroon	CMR	Capture	Pargo breams nei	Red porgy	Atlantic, Eastern Central	Marine fish	Pagrus pagrus (Linnaeus, 1758)	Red porgy	3.9	7246	0	0	0	0	0	0	0	0	0	0	0	0	0	0	0	0	0	0	0	0	0	0	0	0	0	0	0	0	0	0	0	0	0	0	0	0	0	0	0
Cameroon	CMR	Capture	Round sardinella	Round sardinella	Atlantic, Eastern Central	Marine fish	Sardinella aurita Valenciennes, 1847	Round sardinella	3.4	452	0	0	0	0	0	0	0	0	0	0	0	0	0	0	0	0	0	0	0	0	0	0	0	0	0	0	0	0	0	0	0	0	0	0	0	0	0	0	0
Cameroon	CMR	Capture	Royal threadfin	Royal threadfin	Atlantic, Eastern Central	Marine fish	Pentanemus quinquarius (Linnaeus, 1758)	Royal threadfin	3.6	30062	0	0	0	0	0	0	0	0	0	372	660	829	829	0	0	0	2100	1777	1500	610	584	1000	2368	1778	1363	3276	832	1698	800	5	131	131	333	535	650	770	890	1030	1180
Cameroon	CMR	Capture	Sardinellas nei	Sardine	Atlantic, Eastern Central	Marine fish	C209	Sardine	3.16667	581836	15000	15000	15000	18000	18000	18027	18058	18033	18065	18047	18000	18000	18000	18000	18000	17490	16008	16006	18600	24002	24002	23500	23000	23500	21611	21645	22540	21760	11800	1805	2103	2103	2100	2100	2200	2300	2400	2500	2600
Cameroon	CMR	Capture	Sharks, rays, skates, etc. nei	Shark, ray, skate	Atlantic, Eastern Central	Marine fish	C328	Shark and ray and skate	4.20556	11431.9	128	143	108	110	113	70	80	67	51	37	22	37	37	68	68	66	157	92	80	59	48	50	55	86	67	146	85	95	500	1091	1091	1091	1090	952	825	700	575	450	325
Cameroon	CMR	Capture	Penaeus shrimps nei	Shrimp	Atlantic, Eastern Central	Crustacean	Crustacean	Crustacean	2.5	122017	1816	2438	980	975	432	338	564	911	859	661	830	879	1042	1179	1092	933	489	462	520	514	571	450	635	326	471	168	280	531	550	557	501	651	500	345	450	550	640	730	820
Cameroon	CMR	Capture	Sea catfishes nei	Smoothmouth sea catfish	Atlantic, Eastern Central	Marine fish	Carlarius heudelotii (Valenciennes, 1840)	Smoothmouth sea catfish	3.8	85947	1064	1087	1448	1452	1484	1239	1312	722	543	465	235	598	598	505	505	490	313	334	600	976	886	640	370	520	455	410	589	649	430	209	339	339	1100	1900	2700	3500	4300	5100	5900
Cameroon	CMR	Capture	Snappers nei	Snapper	Atlantic, Eastern Central	Marine fish	C242	Snapper	4	8820	3	13	1	1	1	1	13	2	3	2	0	0	0	4	4	4	2	1	300	510	511	400	320	337	337	293	297	280	400	480	485	485	480	450	450	450	400	400	350
Cameroon	CMR	Capture	Sompat grunt	Sompat grunt	Atlantic, Eastern Central	Marine fish	Pomadasys jubelini (Cuvier, 1830)	Sompat grunt	3.3	20554	0	0	0	0	0	0	0	0	0	0	0	0	0	0	0	0	0	0	0	534	533	400	337	345	304	48	342	534	800	1129	479	579	750	930	1100	1280	1460	1640	1820
Cameroon	CMR	Capture	Threadfins, tasselfishes nei	Threadfin	Atlantic, Eastern Central	Marine fish	C284	Threadfin	3.8	82173	929	1037	764	2000	2000	2000	2000	2000	2000	2000	2000	0	0	680	680	660	0	0	0	0	0	0	0	0	0	0	0	0	0	0	0	0	2000	2500	3000	3500	4000	4500	4900
Cameroon	CMR	Capture	Tonguefishes	Tonguesole	Atlantic, Eastern Central	Marine fish	C295	Tonguesole	3.5125	42496	857	807	745	749	765	837	962	732	219	233	435	607	607	834	834	810	701	653	700	753	748	700	594	455	488	439	788	750	500	155	135	135	225	315	350	350	350	350	350
Cameroon	CMR	Capture	Tuna-like fishes nei	Tuna, bonito	Atlantic, Eastern Central	Marine fish	C309	Tuna and bonito	4.45556	4597.06	0	0	0	0	0	0	25	0	0	1	0	0	0	3	3	3	6	6	1	1	0	0	0	0	1	0	59	36	22	5	5	5	60	120	180	240	300	360	420
Cameroon	CMR	Capture	Turbots nei	Turbot	Atlantic, Eastern Central	Marine fish	Scophthalmus maximus (Linnaeus, 1758)	Turbot	4.4	1590	0	0	0	0	0	0	0	0	0	0	0	0	0	0	0	0	0	0	0	0	0	0	0	0	0	0	0	0	0	0	0	0	0	0	0	0	0	0	0
Cameroon	CMR	Capture	West African goatfish	West African goatfish	Atlantic, Eastern Central	Marine fish	Pseudupeneus prayensis (Cuvier, 1829)	West African goatfish	3.2	26851	0	0	0	0	0	0	0	0	0	0	0	0	0	0	0	0	0	0	0	0	0	0	0	0	0	0	0	0	0	0	0	0	1000	1500	2000	2500	3000	3500	4000
Cameroon	CMR	Capture	West African ilisha	West African ilisha	Atlantic, Eastern Central	Marine fish	Ilisha africana (Bloch, 1795)	West African ilisha	3.6	1891	0	0	0	0	0	0	0	0	0	0	0	0	0	0	0	0	0	0	0	0	0	0	0	0	0	0	0	0	0	0	0	0	0	0	0	0	0	0	0
Cameroon	CMR	Aquaculture	African bonytongue	African bonytongue	Africa - Inland waters	Freshwater fish	Heterotis niloticus (Cuvier, 1829)	African bonytongue	2.7	325	0	0	0	0	0	0	0	0	0	0	0	0	0	0	0	0	0	0	0	0	0	0	0	0	0	0	0	15	15	15	15	30	30	30	40	41	15	15	15
Cameroon	CMR	Aquaculture	Common carp	Common carp	Africa - Inland waters	Freshwater fish	Cyprinus carpio Linnaeus, 1758	Common carp	3.1	729	0	1	3	6	10	14	20	25	95	26	31	34	42	30	20	10	5	3	3	5	5	4	4	4	0	0	6	8	6	7	10	20	20	20	28	28	20	20	20
Cameroon	CMR	Aquaculture	Freshwater fishes nei	Freshwater fish	Africa - Inland waters	Freshwater fish	Weighted mean	Freshwater fish	2.74956	335	0	0	0	0	0	0	0	0	0	0	0	0	0	0	0	0	0	0	0	0	0	0	0	0	0	0	0	50	50	50	50	15	15	15	15	15	15	15	15
Cameroon	CMR	Aquaculture	Nile tilapia	Nile tilapia	Africa - Inland waters	Freshwater fish	Oreochromis niloticus (Linnaeus, 1758)	Nile tilapia	2	12037	0	4	8	15	25	40	60	80	147	91	87	96	116	100	80	60	50	45	45	50	50	60	60	60	40	100	210	238	210	220	250	290	290	290	290	290	600	730	860
Cameroon	CMR	Aquaculture	North African catfish	North African catfish	Africa - Inland waters	Freshwater fish	Clarias gariepinus (Burchell, 1822)	North African catfish	3.8	8188	0	0	0	1	5	3	9	15	40	13	6	7	9	8	6	4	2	2	2	2	3	3	3	3	10	50	114	74	114	110	110	152	152	152	152	152	150	400	650
[truncated: 14,328 more rows]
[truncated: 5 more columns]
