# Supplementary material for: Effect of trade on global aquatic food consumption patterns
Source: Nat Commun. 2024 Feb 15;15:1412. doi: 10.1038/s41467-024-45556-w (PMC10869811; doi:10.1038/s41467-024-45556-w)
Supplement: Supplementary file 6 — Supplementary Data 3 [file 41467_2024_45556_MOESM6_ESM.xlsx]

## Sheet: Capture-species group
Code	ASFIS species (Name)	FAO major fishing area (Name)	Common name	Latin name	Trophic level	Human uses and comment	Mean trophic level
C1	[Brycon spp]	America, South - Inland waters	/	Brycon amazonicus (Spix & Agassiz, 1829)	3	/	2.93333
			/	Brycon dentex Günther, 1860	3.1	/
			/	Brycon orbignyanus (Valenciennes, 1850)	2.7	/
C2	[Chirostoma spp]	America, North - Inland waters	Smallmouth silverside	Chirostoma chapalae Jordan & Snyder, 1899	3.2	Fisheries: commercial	3.23333
			Pike silverside	Pike silverside	3.3	Fisheries: minor commercial
			Charal	Chirostoma jordani Woolman, 1894	3.2	Fisheries: commercial
C3	[Hemiodus spp]	America, South - Inland waters	/	Hemiodus argenteus Pellegrin, 1909	2.7	Fisheries: minor commercial	2.62
			/	Hemiodus immaculatus Kner, 1858	2.9	Fisheries: minor commercial
			/	Hemiodus microlepis Kner, 1858	2.8	Fisheries: minor commercial
			Halfline hemiodus	Hemiodus semitaeniatus Kner, 1858	2.7	Fisheries: minor commercial; aquarium: commercial
			/	Hemiodus unimaculatus (Bloch, 1794)	2	Fisheries: minor commercial; aquarium: commercial
C4	[Pimelodus spp]	America, South - Inland waters	Bloch's catfish	Pimelodus blochii Valenciennes, 1840	3.1	Fisheries: commercial; aquarium: commercial	3.2
			/	Pimelodus ornatus Kner, 1858	3.3	Fisheries: commercial; aquarium: commercial
C5	Alfonsinos nei	Global	Splendid alfonsino	Beryx splendens Lowe, 1834	4.3	Fisheries: commercial	4.2
			Alfonsino	Beryx decadactylus Cuvier, 1829	4.1	Fisheries: commercial
C6	Amberjacks nei	Gobal	Greater amberjack	Seriola dumerili (Risso, 1810)	4.5	Fisheries: minor commercial; aquaculture: commercial; gamefish: yes; aquarium: public aquariums	4.35
			Yellowtail amberjack	Seriola lalandi Valenciennes, 1833	4.2	Fisheries: minor commercial; aquaculture: experimental; gamefish: yes
C7	Amberjacks nei	Pacific, Northwest	Greater amberjack	Seriola dumerili (Risso, 1810)	4.5	Fisheries: minor commercial; aquaculture: commercial; gamefish: yes; aquarium: public aquariums	4.23333
			Yellowtail amberjack	Seriola lalandi Valenciennes, 1833	4.2	Fisheries: minor commercial; aquaculture: experimental; gamefish: yes
			Japanese amberjack	Seriola quinqueradiata Temminck & Schlegel, 1845	4	Fisheries: highly commercial; aquaculture: commercial; gamefish: yes
C8	Anchovies, etc. nei	Indian Ocean, Pacific, Southwest, Western	Goldspotted grenadier anchovy	Coilia dussumieri Valenciennes, 1848	3.3	Fisheries: commercial	3.3
			Commerson's anchovy	Stolephorus commersonnii Lacepède, 1803	3.1	Fisheries: commercial
			Hardenberg's anchovy	Stolephorus insularis Hardenberg, 1933	3.2	Fisheries: commercial; bait: usually
			Spotty-face anchovy	Stolephorus waitei Jordan & Seale, 1926	3.3	Fisheries: commercial
			Moustached thryssa	Thryssa mystax (Bloch & Schneider, 1801)	3.6	Fisheries: commercial
C9	Anchovies, etc. nei	Atlantic, Southwest	Longfinger anchovy	Anchoa filifera (Fowler, 1915)	3.4	Fisheries: minor commercial	3.2625
			Broad-striped anchovy	Anchoa hepsetus (Linnaeus, 1758)	3.3	Fisheries: minor commercial; bait: usually
			Spicule anchovy	Anchoa spinifer (Valenciennes, 1848)	4.1	Fisheries: minor commercial
			Zabaleta anchovy	Anchovia clupeoides (Swainson, 1839)	3.4	Fisheries: minor commercial; bait: usually
			Broadband anchovy	Anchoviella lepidentostole (Fowler, 1911)	3.1	Fisheries: minor commercial
			Atlantic anchoveta	Cetengraulis edentulus (Cuvier, 1829)	2.1	Fisheries: minor commercial; bait: usually
			Silver anchovy	Engraulis eurystole (Swain & Meek, 1884)	3	Fisheries: minor commercial
			Atlantic sabretooth anchovy	Lycengraulis grossidens (Spix & Agassiz, 1829)	3.7	Fisheries: minor commercial
C10	Anglerfishes nei	Pacific, Northwest	Blackmouth angler	Lophiomus setigerus (Vahl, 1797)	4	Fisheries: commercial	4.05
			Yellow goosefish	Lophius litulon (Jordan, 1902)	4.1	Fisheries: commercial
C11	Barracudas nei	Atlantic	Great barracuda	Sphyraena barracuda (Edwards, 1771)	4.5	Fisheries: minor commercial; gamefish: yes; aquarium: public aquariums	4.46667
			Great barracuda	Sphyraena barracuda (Edwards, 1771)	4.5	Fisheries: minor commercial; gamefish: yes; aquarium: public aquariums
			Guachanche barracuda	Sphyraena guachancho Cuvier, 1829	4.4	Fisheries: commercial
C12	Barracudas nei	Indo-West Pacific	Pickhandle barracuda	Sphyraena jello Cuvier, 1829	4.5	Fisheries: commercial; gamefish: yes	4.5
			Obtuse barracuda	Sphyraena obtusata Cuvier, 1829	4.5	Fisheries: commercial; gamefish: yes
C13	Barracudas nei	Pacific, Northeast	Great barracuda	Sphyraena barracuda (Edwards, 1771)	4.5	Fisheries: minor commercial; gamefish: yes; aquarium: public aquariums	4.33333
			Pacific barracuda	Sphyraena argentea Girard, 1854	4.5	Fisheries: commercial; gamefish: yes
			Mexican barracuda	Sphyraena ensis Jordan & Gilbert, 1882	4	Fisheries: commercial; gamefish: yes
C14	Bastard halibuts nei	Atlantic, Southwest	Brazilian flounder	Paralichthys brasiliensis (Ranzani, 1842)	4.4	Fisheries: commercial; gamefish: yes	4.15
			Patagonian flounder	Paralichthys patagonicus Jordan, 1889	3.9	Fisheries: commercial
C15	Bigeyes nei	Atlantic	Atlantic bigeye	Priacanthus arenatus Cuvier, 1829	4	Fisheries: minor commercial; gamefish: yes; aquarium: commercial	3.8
			Glasseye	Heteropriacanthus cruentatus (Lacepède, 1801)	3.6	Fisheries: minor commercial; aquarium: commercial
C16	Bigeyes nei	Indo-Pacific	Glasseye	Heteropriacanthus cruentatus (Lacepède, 1801)	3.6	Fisheries: minor commercial; aquarium: commercial	3.76667
			Moontail bullseye	Priacanthus hamrur (Forsskål, 1775)	3.6	Fisheries: minor commercial; aquarium: commercial
			Red bigeye	Priacanthus macracanthus Cuvier, 1829	4.1	Fisheries: commercial
C17	Bonnetmouths, rubyfishes nei	Indian Ocean	Cape bonnetmouth	Emmelichthys nitidus Richardson, 1845	3.4	Fisheries: minor commercial	3.4
			Rubyfish	Plagiogeneion rubiginosum (Hutton, 1875)	3.4	Fisheries: commercial
C18	Brazilian groupers nei	Atlantic, Southwest	Dusky grouper	Epinephelus marginatus (Lowe, 1834)	4.4	Fisheries: highly commercial; gamefish: yes	4.16
			Red grouper	Epinephelus morio (Valenciennes, 1828)	3.5	Fisheries: commercial; gamefish: yes; aquarium: public aquariums
			Nassau grouper	Epinephelus striatus (Bloch, 1792)	4.1	Fisheries: commercial; gamefish: yes; aquarium: public aquariums
			Yellowedge grouper	Hyporthodus flavolimbatus (Poey, 1865)	3.8	Fisheries: commercial; gamefish: yes
			Warsaw grouper	Hyporthodus nigritus (Holbrook, 1855)	4	Fisheries: commercial; gamefish: yes
			Snowy grouper	Hyporthodus niveatus (Valenciennes, 1828)	4	Fisheries: commercial
			Black grouper	Mycteroperca bonaci (Poey, 1860)	4.3	Fisheries: highly commercial; gamefish: yes; aquarium: public aquariums
			Yellowmouth grouper	Mycteroperca interstitialis (Poey, 1860)	4.5	Fisheries: commercial; aquarium: public aquariums
			Tiger grouper	Mycteroperca tigris (Valenciennes, 1833)	4.5	Fisheries: commercial; aquarium: public aquariums
			Yellowfin grouper	Mycteroperca venenosa (Linnaeus, 1758)	4.5	Fisheries: highly commercial; gamefish: yes; aquarium: public aquariums
C19	Butterfishes, pomfrets nei	Atlantic, Southwest, Pacific, Southeast	Atlantic pomfret	Brama brama (Bonnaterre, 1788)	4.1	Fisheries: commercial	4.25
			Pomfret	Taractes rubescens (Jordan & Evermann, 1887)	4.4	Fisheries: commercial
C20	Butterfishes, pomfrets nei	Pacific, West	Atlantic pomfret	Brama brama (Bonnaterre, 1788)	4.1	Fisheries: commercial	3.5125
			Bluefinned butterfish	Odax cyanoallix Ayling & Paxton, 1983	2.7	Fisheries: minor commercial
			Butterfish	Odax pullus (Forster, 1801)	2.1	Fisheries: minor commercial
			Pacific pomfret	Brama japonica Hilgendorf, 1878	4.4	Fisheries: commercial
			Silver pomfret	Pampus argenteus (Euphrasen, 1788)	3.3	Fisheries: highly commercial
			Black pomfret	Parastromateus niger (Bloch, 1795)	2.9	Fisheries: highly commercial
			Pomfret	Taractes rubescens (Jordan & Evermann, 1887)	4.4	Fisheries: commercial
			Sickle pomfret	Taractichthys steindachneri (Döderlein, 1883)	4.2	Fisheries: commercial
C21	Butterfishes, pomfrets nei	Indian Ocean	Atlantic pomfret	Brama brama (Bonnaterre, 1788)	4.1	Fisheries: commercial	3.68333
			Blue weed whiting	Haletta semifasciata (Valenciennes, 1840)	3.2	Fisheries: minor commercial
			Silver pomfret	Pampus argenteus (Euphrasen, 1788)	3.3	Fisheries: highly commercial
			Black pomfret	Parastromateus niger (Bloch, 1795)	2.9	Fisheries: highly commercial
			Pomfret	Taractes rubescens (Jordan & Evermann, 1887)	4.4	Fisheries: commercial
			Sickle pomfret	Taractichthys steindachneri (Döderlein, 1883)	4.2	Fisheries: commercial
C22	Carangids nei	Atlantic, Western Central	African pompano	Alectis ciliaris (Bloch, 1787)	4	Fisheries: minor commercial; gamefish: yes; aquarium: commercial	4.06667
			Lookdown	Selene vomer (Linnaeus, 1758)	4.3	Fisheries: minor commercial; gamefish: yes; aquarium: public aquariums
			Greater amberjack	Seriola dumerili (Risso, 1810)	4.5	Fisheries: minor commercial; aquaculture: commercial; gamefish: yes; aquarium: public aquariums
			Pilotfish	Naucrates ductor (Linnaeus, 1758)	3.4	Fisheries: minor commercial; gamefish: yes; aquarium: public aquariums
			Horse-eye jack	Caranx latus Agassiz, 1831	4.2	Fisheries: minor commercial; gamefish: yes; aquarium: commercial
			Bar jack	Caranx ruber (Bloch, 1793)	4.3	Fisheries: commercial; gamefish: yes
			White trevally	Pseudocaranx dentex (Bloch & Schneider, 1801)	3.9	Fisheries: commercial; aquaculture: commercial; gamefish: yes
			Longfin yellowtail	Seriola rivoliana Valenciennes, 1833	4.5	Fisheries: commercial; gamefish: yes
			Florida pompano	Trachinotus carolinus (Linnaeus, 1766)	3.5	Fisheries: highly commercial; aquaculture: commercial; gamefish: yes; aquarium: public aquariums
C23	Carangids nei	Atlantic, Eastern	Greater amberjack	Seriola dumerili (Risso, 1810)	4.5	Fisheries: minor commercial; aquaculture: commercial; gamefish: yes; aquarium: public aquariums	3.9
			Pilotfish	Naucrates ductor (Linnaeus, 1758)	3.4	Fisheries: minor commercial; gamefish: yes; aquarium: public aquariums
			White trevally	Pseudocaranx dentex (Bloch & Schneider, 1801)	3.9	Fisheries: commercial; aquaculture: commercial; gamefish: yes
			Pompano	Trachinotus ovatus (Linnaeus, 1758)	3.7	Fisheries: minor commercial; aquaculture: commercial; gamefish: yes
			African pompano	Alectis ciliaris (Bloch, 1787)	4	Fisheries: minor commercial; gamefish: yes; aquarium: commercial
C24	Carangids nei	Indian Ocean	African pompano	Alectis ciliaris (Bloch, 1787)	4	Fisheries: minor commercial; gamefish: yes; aquarium: commercial	4.03636
			Island trevally	Carangoides orthogrammus (Jordan & Gilbert, 1882)	4.5	Fisheries: commercial; gamefish: yes
			Giant trevally	Caranx ignobilis (Forsskål, 1775)	4.2	Fisheries: commercial; aquaculture: commercial; gamefish: yes; aquarium: public aquariums
			Indian scad	Decapterus russelli (Rüppell, 1830)	3.7	Fisheries: highly commercial; bait: occasionally
			Golden trevally	Gnathanodon speciosus (Forsskål, 1775)	3.8	Fisheries: minor commercial; aquaculture: commercial; gamefish: yes; aquarium: commercial
			Greater amberjack	Seriola dumerili (Risso, 1810)	4.5	Fisheries: minor commercial; aquaculture: commercial; gamefish: yes; aquarium: public aquariums
			Pilotfish	Naucrates ductor (Linnaeus, 1758)	3.4	Fisheries: minor commercial; gamefish: yes; aquarium: public aquariums
			Blue trevally	Carangoides ferdau (Forsskål, 1775)	4.3	Fisheries: commercial; gamefish: yes
			White trevally	Pseudocaranx dentex (Bloch & Schneider, 1801)	3.9	Fisheries: commercial; aquaculture: commercial; gamefish: yes
			Longfin yellowtail	Seriola rivoliana Valenciennes, 1833	4.5	Fisheries: commercial; gamefish: yes
			Small spotted dart	Trachinotus baillonii (Lacepède, 1801)	3.6	Fisheries: minor commercial; gamefish: yes
C25	Carangids nei	Pacific, Western Central	African pompano	Alectis ciliaris (Bloch, 1787)	4	Fisheries: minor commercial; gamefish: yes; aquarium: commercial	3.98333
			Island trevally	Carangoides orthogrammus (Jordan & Gilbert, 1882)	4.5	Fisheries: commercial; gamefish: yes
			Giant trevally	Caranx ignobilis (Forsskål, 1775)	4.2	Fisheries: commercial; aquaculture: commercial; gamefish: yes; aquarium: public aquariums
			Indian scad	Decapterus russelli (Rüppell, 1830)	3.7	Fisheries: highly commercial; bait: occasionally
			Golden trevally	Gnathanodon speciosus (Forsskål, 1775)	3.8	Fisheries: minor commercial; aquaculture: commercial; gamefish: yes; aquarium: commercial
			Greater amberjack	Seriola dumerili (Risso, 1810)	4.5	Fisheries: minor commercial; aquaculture: commercial; gamefish: yes; aquarium: public aquariums
			Japanese jack mackerel	Trachurus japonicus (Temminck & Schlegel, 1844)	3.4	Fisheries: highly commercial; aquaculture: commercial
			Pilotfish	Naucrates ductor (Linnaeus, 1758)	3.4	Fisheries: minor commercial; gamefish: yes; aquarium: public aquariums
			Blue trevally	Carangoides ferdau (Forsskål, 1775)	4.3	Fisheries: commercial; gamefish: yes
			White trevally	Pseudocaranx dentex (Bloch & Schneider, 1801)	3.9	Fisheries: commercial; aquaculture: commercial; gamefish: yes
			Longfin yellowtail	Seriola rivoliana Valenciennes, 1833	4.5	Fisheries: commercial; gamefish: yes
			Small spotted dart	Trachinotus baillonii (Lacepède, 1801)	3.6	Fisheries: minor commercial; gamefish: yes
C26	Carangids nei	Pacific, Southeast, Eastern	Golden trevally	Gnathanodon speciosus (Forsskål, 1775)	3.8	Fisheries: minor commercial; aquaculture: commercial; gamefish: yes; aquarium: commercial	3.95
			Greater amberjack	Seriola dumerili (Risso, 1810)	4.5	Fisheries: minor commercial; aquaculture: commercial; gamefish: yes; aquarium: public aquariums
			Pilotfish	Naucrates ductor (Linnaeus, 1758)	3.4	Fisheries: minor commercial; gamefish: yes; aquarium: public aquariums
			White trevally	Pseudocaranx dentex (Bloch & Schneider, 1801)	3.9	Fisheries: commercial; aquaculture: commercial; gamefish: yes
			Longfin yellowtail	Seriola rivoliana Valenciennes, 1833	4.5	Fisheries: commercial; gamefish: yes
			Small spotted dart	Trachinotus baillonii (Lacepède, 1801)	3.6	Fisheries: minor commercial; gamefish: yes
C27	Carangids nei	Mediterranean and Black Sea	Greater amberjack	Seriola dumerili (Risso, 1810)	4.5	Fisheries: minor commercial; aquaculture: commercial; gamefish: yes; aquarium: public aquariums	3.875
			Pilotfish	Naucrates ductor (Linnaeus, 1758)	3.4	Fisheries: minor commercial; gamefish: yes; aquarium: public aquariums
			White trevally	Pseudocaranx dentex (Bloch & Schneider, 1801)	3.9	Fisheries: commercial; aquaculture: commercial; gamefish: yes
			Pompano	Trachinotus ovatus (Linnaeus, 1758)	3.7	Fisheries: minor commercial; aquaculture: commercial; gamefish: yes
C28	Cardinal fishes nei	Indian Ocean, Western	Luminous deepsea cardinalfish	Epigonus macrops (Brauer, 1906)	3.5	/	3.56667
			Black cardinal fish	Epigonus telescopus (Risso, 1810)	3.6	Fisheries: commercial
			Hartzfeld's cardinalfish	Ostorhinchus hartzfeldii (Bleeker, 1852)	3.6	Fisheries: minor commercial; aquarium: commercial
C29	Catfishes nei	America, North - Inland waters	Black bullhead	Ameiurus melas (Rafinesque, 1820)	3.8	North America: Great Lakes to northern Mexico. Confusion over the taxonomic status of this species together with Ameiurus nebulosus resulted in more doubts as to which of the two is present in some countries. In Europe it forms dense stunted populations which makes it unpopular. Several countries report adverse ecological impact after introduction (Ref. 1739). In Europe, self-sustaining populatio…	3.775
			Brown bullhead	Ameiurus nebulosus (Lesueur, 1819)	3.7	North America: Atlantic and Gulf Slope drainages from Nova Scotia and New Brunswick in Canada to Mobile Bay in Alabama in USA; St. Lawrence-Great Lakes, Hudson Bay, and Mississippi River basins from Quebec west to southeastern Saskatchewan in Canada, and south to Louisiana, USA. Introduced into several countries. Several countries report adverse ecological impact after introduction.
			Blue catfish	Ictalurus furcatus (Valenciennes, 1840)	3.4	North America: USA (Mississippi River basin from western Pennsylvania to southern South Dakota and Platte River in southwestern Nebraska, south to Gulf; Gulf Slope from Escambia River drainage (where introduced), Alabama and Florida, to Rio Grande drainage in Texas and New Mexico; and Mexico. Introduced in Atlantic Slope drainages, western states, and Minnesota.
			Channel catfish	Ictalurus punctatus (Rafinesque, 1818)	4.2	North America: St. Lawrence-Great Lakes, Hudson Bay (Red River drainage), and Missouri-Mississippi river basins from southern Quebec to southern Manitoba and Montana south to Gulf. Possibly native on Atlantic and Gulf slopes from Susquehanna River to Neuse River, and from Savannah River to Lake Okeechobee, Florida, and west to northern Mexico and eastern New Mexico. Introduced throughout most of …
C30	Characins nei	America, South - Inland waters	Banded leporinus	Leporinus fasciatus (Bloch, 1794)	3	Fisheries: minor commercial; aquarium: commercial	3
			Threespot leporinus	Leporinus friderici (Bloch, 1794)	3.3	Fisheries: minor commercial; aquaculture: experimental
			/	Megaleporinus obtusidens (Valenciennes, 1837)	3.2	Fisheries: commercial; aquaculture: commercial; gamefish: yes
			/	Schizodon fasciatus Spix & Agassiz, 1829	2.5	Fisheries: commercial; aquarium: commercial
C31	Characins nei	Africa - Inland waters	Silversides	Alestes baremoze (Joannis, 1835)	3.1	Fisheries: highly commercial	2.93333
			Characin	Alestes dentex (Linnaeus, 1758)	2.9	Fisheries: commercial
			True big-scale tetra	Brycinus macrolepidotus Valenciennes, 1850	2.8	Fisheries: commercial
C32	Clupeoids nei	Mediterranean and Black Sea	Round sardinella	Sardinella aurita Valenciennes, 1847	3.4	Fisheries: highly commercial; bait: usually	3.3
			Madeiran sardinella	Sardinella maderensis (Lowe, 1838)	3.2	Fisheries: highly commercial; bait: usually
C33	Clupeoids nei	Atlantic, Western	Round sardinella	Sardinella aurita Valenciennes, 1847	3.4	Fisheries: highly commercial; bait: usually	3.23333
			Madeiran sardinella	Sardinella maderensis (Lowe, 1838)	3.2	Fisheries: highly commercial; bait: usually
			Brazilian sardinella	Sardinella brasiliensis (Steindachner, 1879)	3.1	Fisheries: highly commercial; bait: usually
C34	Clupeoids nei	Indo-West Pacific	Spotted sardinella	Amblygaster sirm (Walbaum, 1792)	2.9	Fisheries: commercial; bait: usually	2.78571
			White sardine	Escualosa thoracata (Valenciennes, 1847)	3.2	Fisheries: commercial
			White sardinella	Sardinella albella (Valenciennes, 1847)	2.6	Fisheries: commercial
			Fringescale sardinella	Sardinella fimbriata (Valenciennes, 1847)	2.7	Fisheries: commercial
			Goldstripe sardinella	Sardinella gibbosa (Bleeker, 1849)	2.9	Fisheries: highly commercial
			Indian oil sardine	Sardinella longiceps Valenciennes, 1847	2.4	Fisheries: highly commercial
			South American pilchard	Sardinops sagax (Jenyns, 1842)	2.8	Fisheries: highly commercial; bait: usually
C35	Clupeoids nei	Atlantic, Eastern	Round sardinella	Sardinella aurita Valenciennes, 1847	3.4	Fisheries: highly commercial; bait: usually	3.25
			European pilchard	Sardina pilchardus (Walbaum, 1792)	3.1	Fisheries: highly commercial
C36	Conger eels, etc. nei	Atlantic, Eastern	Bandtooth conger	Ariosoma balearicum (Delaroche, 1809)	3.9	Fisheries: minor commercial	4.1
			European conger	Conger conger (Linnaeus, 1758)	4.3	Fisheries: commercial; gamefish: yes; aquarium: public aquariums
C37	Conger eels, etc. nei	Pacific, Western	Speckled longfin eel	Anguilla reinhardtii Steindachner, 1867	3.6	Fisheries: commercial; aquaculture: commercial; gamefish: yes	4.08
			Silvery conger	Ariosoma anago (Temminck & Schlegel, 1846)	4	/
			Longfin African conger	Conger cinereus Rüppell, 1830	4.3	Fisheries: commercial; gamefish: yes; aquarium: commercial
			Grey conger	Conger esculentus Poey, 1861	4.5	Fisheries: minor commercial
			Whitespotted conger	Conger myriaster (Brevoort, 1856)	4	Fisheries: highly commercial
C38	Conger eels, etc. nei	Atlantic, Southwest	Bandtooth conger	Ariosoma balearicum (Delaroche, 1809)	3.9	Fisheries: minor commercial	4.175
			Conger eel	Bathycongrus thysanochilus (Reid, 1934)	3.8	/
			Grey conger	Conger esculentus Poey, 1861	4.5	Fisheries: minor commercial
			American conger	Conger oceanicus (Mitchill, 1818)	4.5	Fisheries: minor commercial
C39	Conger eels, etc. nei	Indian Ocean, Western	Bandtooth conger	Ariosoma balearicum (Delaroche, 1809)	3.9	Fisheries: minor commercial	4.25
			Longfin African conger	Conger cinereus Rüppell, 1830	4.3	Fisheries: commercial; gamefish: yes; aquarium: commercial
			Grey conger	Conger esculentus Poey, 1861	4.5	Fisheries: minor commercial
			Indian pike conger	Congresox talabonoides (Bleeker, 1853)	4.3	Fisheries: commercial
C40	Croakers nei	Atlantic, Eastern Central	Meagre	Argyrosomus regius (Asso, 1801)	4.3	Fisheries: commercial; gamefish: yes	4.03333
			Bobo croaker	Pseudotolithus elongatus (Bowdich, 1825)	4.1	Fisheries: commercial
			Longneck croaker	Pseudotolithus typus Bleeker, 1863	3.7	Fisheries: commercial
C41	Croakers, drums nei	Atlantic, Eastern	Meagre	Argyrosomus regius (Asso, 1801)	4.3	Fisheries: commercial; gamefish: yes	4.03333
			Bobo croaker	Pseudotolithus elongatus (Bowdich, 1825)	4.1	Fisheries: commercial
			Longneck croaker	Pseudotolithus typus Bleeker, 1863	3.7	Fisheries: commercial
C42	Croakers, drums nei	Atlantic, Western	Whitemouth croaker	Micropogonias furnieri (Desmarest, 1823)	3.1	Fisheries: highly commercial	3.6
			Atlantic croaker	Micropogonias undulatus (Linnaeus, 1766)	4	Fisheries: commercial; aquaculture: experimental; gamefish: yes
			Smalleye croaker	Nebris microps Cuvier, 1830	3.6	Fisheries: commercial
			Red drum	Sciaenops ocellatus (Linnaeus, 1766)	3.7	Fisheries: minor commercial; aquaculture: commercial; gamefish: yes; aquarium: public aquariums
C43	Croakers, drums nei	Pacific, Western	Japanese meagre	Argyrosomus japonicus (Temminck & Schlegel, 1843)	4.5	Fisheries: commercial; aquaculture: commercial; gamefish: yes	3.84615
			Blackmouth croaker	Atrobucca nibe (Jordan & Thompson, 1911)	4	Fisheries: commercial
			Largefin croaker	Johnius macropterus (Bleeker, 1853)	3.3	Fisheries: commercial
			Yellow croaker	Larimichthys polyactis (Bleeker, 1877)	3.7	Fisheries: highly commercial; aquarium: commercial
			Yellow drum	Nibea albiflora (Richardson, 1846)	4	Fisheries: commercial
			Soldier croaker	Nibea soldado (Lacepède, 1802)	4	Fisheries: commercial
			Tigertooth croaker	Otolithes ruber (Bloch & Schneider, 1801)	3.6	Fisheries: commercial
			Pama croaker	Otolithoides pama (Hamilton, 1822)	3.9	Fisheries: commercial
			Donkey croaker	Pennahia anea (Bloch, 1793)	4	Fisheries: commercial
			Silver croaker	Pennahia argentata (Houttuyn, 1782)	4.1	Fisheries: commercial
			Pawak croaker	Pennahia pawak (Lin, 1940)	3.3	Fisheries: commercial
			Big-head pennah croaker	Pennahia macrocephalus (Tang, 1937)	4.1	Fisheries: highly commercial
			Blackspotted croaker	Protonibea diacanthus (Lacepède, 1802)	3.5	Fisheries: minor commercial; aquaculture: commercial
C44	Croakers, drums nei	Indian Ocean	Southern meagre	Argyrosomus hololepidotus (Lacepède, 1801)	4.5	Fisheries: commercial; gamefish: yes	3.81875
			Japanese meagre	Argyrosomus japonicus (Temminck & Schlegel, 1843)	4.5	Fisheries: commercial; aquaculture: commercial; gamefish: yes
			Blackmouth croaker	Atrobucca nibe (Jordan & Thompson, 1911)	4	Fisheries: commercial
			Boeseman croaker	Boesemania microlepis (Bleeker, 1858)	3.7	Fisheries: highly commercial
			Bengal corvina	Daysciaena albida (Cuvier, 1830)	3.8	Fisheries: commercial
			Spindle croaker	Johnius elongatus Lal Mohan, 1976	3.3	Fisheries: commercial
			Pale spotfin croaker	Johnius glaucus (Day, 1876)	3.5	Fisheries: commercial
			Largefin croaker	Johnius macropterus (Bleeker, 1853)	3.3	Fisheries: commercial
			Kathala croaker	Kathala axillaris (Cuvier, 1830)	3.5	Fisheries: commercial
			Soldier croaker	Nibea soldado (Lacepède, 1802)	4	Fisheries: commercial
			Lesser tigertooth croaker	Otolithes cuvieri Trewavas, 1974	3.9	Fisheries: commercial
			Tigertooth croaker	Otolithes ruber (Bloch & Schneider, 1801)	3.6	Fisheries: commercial
			Pama croaker	Otolithoides pama (Hamilton, 1822)	3.9	Fisheries: commercial
			Donkey croaker	Pennahia anea (Bloch, 1793)	4	Fisheries: commercial
			Big-head pennah croaker	Pennahia macrocephalus (Tang, 1937)	4.1	Fisheries: highly commercial
			Blackspotted croaker	Protonibea diacanthus (Lacepède, 1802)	3.5	Fisheries: minor commercial; aquaculture: commercial
C45	Crocodile icefishes nei	Atlantic, Antarctic	Blackfin icefish	Chaenocephalus aceratus (Lönnberg, 1906)	3.4	Fisheries: minor commercial	3.45
			Spiny icefish	Chaenodraco wilsoni Regan, 1914	3.2	Fisheries: minor commercial
			Mackerel icefish	Champsocephalus gunnari Lönnberg, 1905	3.2	Fisheries: minor commercial
			Ocellated icefish	Chionodraco rastrospinosus DeWitt & Hureau, 1979	3.9	Fisheries: minor commercial
			Long-fingered icefish	Cryodraco antarcticus Dollo, 1900	3.6	Fisheries: minor commercial
			South Georgia icefish	Pseudochaenichthys georgianus Norman, 1937	3.4	Fisheries: minor commercial
C46	Cusk-eels nei	Pacific, Southeast	Pacific bearded brotula	Brotula clarkae Hubbs, 1944	4.1	Fisheries: minor commercial	3.9
			Red cusk-eel	Genypterus chilensis (Guichenot, 1848)	3.9	Fisheries: commercial
			Black cusk-eel	Genypterus maculatus (Tschudi, 1846)	4	Fisheries: commercial
			Pudgy cuskeel	Spectrunculus grandis (Günther, 1877)	3.6	Fisheries: minor commercial
C47	Cusk-eels, brotulas nei	Atlantic, Southwest	Bearded brotula	Brotula barbata (Bloch & Schneider, 1801)	3.9	Fisheries: minor commercial; gamefish: yes	3.78
			Pudgy cuskeel	Spectrunculus grandis (Günther, 1877)	3.6	Fisheries: minor commercial
			Pink cusk-eel	Genypterus blacodes (Forster, 1801)	4.2	Fisheries: highly commercial
			Shortbeard cusk-eel	Lepophidium brevibarbe (Cuvier, 1829)	3.6	Fisheries: minor commercial
			Band cusk-eel	Ophidion holbrookii Putnam, 1874	3.6	Fisheries: minor commercial
C48	Dentex nei	Atlantic, Indian Ocean, Western	Common dentex	Dentex dentex (Linnaeus, 1758)	4.5	Fisheries: commercial; aquaculture: commercial; gamefish: yes	4
			Pink dentex	Dentex gibbosus (Rafinesque, 1810)	4.1	Fisheries: commercial; gamefish: yes
			Large-eye dentex	Dentex macrophthalmus (Bloch, 1791)	3.5	Fisheries: commercial; gamefish: yes
			Morocco dentex	Dentex maroccanus Valenciennes, 1830	3.9	Fisheries: commercial; gamefish: yes
C49	Diadromous clupeoids nei	Africa - Inland waters	Bonga shad	Ethmalosa fimbriata (Bowdich, 1825)	2.5	Fisheries: highly commercial; aquaculture: experimental	3
			Smalltoothed pellonula	Pellonula leonensis Boulenger, 1916	3.3	Fisheries: minor commercial; bait: occasionally
			Madeiran sardinella	Sardinella maderensis (Lowe, 1838)	3.2	Fisheries: highly commercial; bait: usually
C50	Diadromous clupeoids nei	Asia - Inland waters	Caspian anadromous shad	Alosa kessleri (Grimm, 1887)	4.5	Fisheries: commercial	3.4
			Chacunda gizzard shad	Anodontostoma chacunda (Hamilton, 1822)	2.8	Fisheries: commercial
			Kelee shad	Hilsa kelee (Cuvier, 1829)	2.9	Fisheries: highly commercial; bait: occasionally
C51	Diadromous clupeoids nei	Indian Ocean, Eastern	Caspian marine shad	Alosa braschnikowi (Borodin, 1904)	3.9	Fisheries: highly commercial	3.15
			Caspian shad	Alosa caspia (Eichwald, 1838)	3.5	Fisheries: highly commercial
			Caspian anadromous shad	Alosa kessleri (Grimm, 1887)	4.5	Fisheries: commercial
			Chacunda gizzard shad	Anodontostoma chacunda (Hamilton, 1822)	2.8	Fisheries: commercial
			Black and Caspian Sea sprat	Clupeonella cultriventris (Nordmann, 1840)	3	Fisheries: highly commercial
			Anchovy sprat	Clupeonella engrauliformis (Borodin, 1904)	3	Fisheries: commercial
			Kelee shad	Hilsa kelee (Cuvier, 1829)	2.9	Fisheries: highly commercial; bait: occasionally
			White sardinella	Sardinella albella (Valenciennes, 1847)	2.6	Fisheries: commercial
			Goldstripe sardinella	Sardinella gibbosa (Bleeker, 1849)	2.9	Fisheries: highly commercial
			Indian oil sardine	Sardinella longiceps Valenciennes, 1847	2.4	Fisheries: highly commercial
C52	Diadromous clupeoids nei	Pacific, Western Central	Caspian shad	Alosa caspia (Eichwald, 1838)	3.5	Fisheries: highly commercial	3.66667
			Caspian anadromous shad	Alosa kessleri (Grimm, 1887)	4.5	Fisheries: commercial
			Black and Caspian Sea sprat	Clupeonella cultriventris (Nordmann, 1840)	3	Fisheries: highly commercial
C53	Diadromous clupeoids nei	America - Inland waters	Round sardinella	Sardinella aurita Valenciennes, 1847	3.4	Fisheries: highly commercial; bait: usually	3.6
			Redear herring	Harengula humeralis (Cuvier, 1829)	3.4	Fisheries: commercial; bait: usually
			Atlantic thread herring	Opisthonema oglinum (Lesueur, 1818)	4.5	Fisheries: commercial; bait: usually
			Brazilian sardinella	Sardinella brasiliensis (Steindachner, 1879)	3.1	Fisheries: highly commercial; bait: usually
C54	Diadromous clupeoids nei	Oceania - Inland waters	Chacunda gizzard shad	Anodontostoma chacunda (Hamilton, 1822)	2.8	Fisheries: commercial	2.925
			White sardine	Escualosa thoracata (Valenciennes, 1847)	3.2	Fisheries: commercial
			Kelee shad	Hilsa kelee (Cuvier, 1829)	2.9	Fisheries: highly commercial; bait: occasionally
			Australian river gizzard shad	Nematalosa erebi (Günther, 1868)	2.8	Fisheries: commercial; bait: usually
C55	Diadromous clupeoids nei	Atlantic, Northeast	Round sardinella	Sardinella aurita Valenciennes, 1847	3.4	Fisheries: highly commercial; bait: usually	3.3
			Madeiran sardinella	Sardinella maderensis (Lowe, 1838)	3.2	Fisheries: highly commercial; bait: usually
C56	Dogfishes and hounds nei	Atlantic, Northeast	Nursehound	Scyliorhinus stellaris (Linnaeus, 1758)	4	Fisheries: minor commercial; aquarium: public aquariums	4.1
			Picked dogfish	Squalus acanthias Linnaeus, 1758	4.4	Fisheries: commercial; gamefish: yes
			Longnose spurdog	Squalus blainville (Risso, 1827)	4	Fisheries: commercial
			Nursehound	Scyliorhinus stellaris (Linnaeus, 1758)	4	Fisheries: minor commercial; aquarium: public aquariums
C57	Dories nei	Pacific, Southwest	Rosy dory	Cyttopsis rosea (Lowe, 1843)	4	Fisheries: commercial	4.3
			Mirror dory	Zenopsis nebulosa (Temminck & Schlegel, 1845)	4.4	Fisheries: commercial
			John dory	Zeus faber Linnaeus, 1758	4.5	Fisheries: commercial; gamefish: yes; aquarium: public aquariums
C58	Eagle rays nei	Indo-West Pacific	Whitespotted eagle ray	Aetobatus narinari (Euphrasen, 1790)	4.2	Fisheries: minor commercial	4
			Banded eagle ray	Aetomylaeus nichofii (Bloch & Schneider, 1801)	3.8	Fisheries: minor commercial
C59	Emperors(=Scavengers) nei	Indo-West Pacific	Spangled emperor	Lethrinus nebulosus (Forsskål, 1775)	3.8	Fisheries: highly commercial; aquaculture: commercial; gamefish: yes	3.8
			Slender emperor	Lethrinus variegatus Valenciennes, 1830	3.8	Fisheries: minor commercial
C60	Filefishes nei	Pacific, Northwest	Unicorn leatherjacket filefish	Aluterus monoceros (Linnaeus, 1758)	3.8	Fisheries: commercial	3.44
			Unicorn leatherjacket filefish	Aluterus monoceros (Linnaeus, 1758)	3.8	Fisheries: commercial
			Ocean triggerfish	Canthidermis sufflamen (Mitchill, 1815)	3.5	Fisheries: commercial; gamefish: yes; aquarium: commercial
			Fan-bellied leatherjacket	Monacanthus chinensis (Osbeck, 1765)	2.4	Fisheries: minor commercial
			False kelpfish	Sebastiscus marmoratus (Cuvier, 1829)	3.7	Fisheries: commercial; aquaculture: commercial; gamefish: yes
C61	Flatfishes nei	Atlantic, Southeast, Eastern Central	Wide-eyed flounder	Bothus podas (Delaroche, 1809)	3.4	Fisheries: commercial; aquarium: commercial	3.7
			Cape scaldfish	Arnoglossus capensis Boulenger, 1898	3.6	Fisheries: commercial
			Spottail spiny turbot	Psettodes belcheri Bennett, 1831	4.1	Fisheries: commercial
C62	Flatfishes nei	Pacific, Southwest	Indian halibut	Psettodes erumei (Bloch & Schneider, 1801)	4.4	Fisheries: commercial	3.695
			Cinnamon flounder	Pseudorhombus cinnamoneus (Temminck & Schlegel, 1846)	4	Fisheries: commercial
			Deep flounder	Pseudorhombus elevatus Ogilby, 1912	3.5	Fisheries: commercial
			Javan flounder	Pseudorhombus javanicus (Bleeker, 1853)	3.5	Fisheries: commercial
			Malayan flounder	Pseudorhombus malayanus Bleeker, 1865	3.5	Fisheries: commercial
			Five-eyed flounder	Pseudorhombus quinquocellatus Weber & de Beaufort, 1929	3.5	Fisheries: commercial
			Largetooth flounder	Pseudorhombus arsius (Hamilton, 1822)	4.2	Fisheries: commercial; gamefish: yes
			Cinnamon flounder	Pseudorhombus cinnamoneus (Temminck & Schlegel, 1846)	4	Fisheries: commercial
			Four twin-spot flounder	Pseudorhombus diplospilus Norman, 1926	3.5	Fisheries: commercial
			Ocellated flounder	Pseudorhombus dupliciocellatus Regan, 1905	4.2	Fisheries: commercial
			Smalltooth flounder	Pseudorhombus jenynsii (Bleeker, 1855)	3.5	Fisheries: commercial
			Spiny flounder	Pseudorhombus spinosus McCulloch, 1914	3.5	Fisheries: commercial
			Bastard halibut	Paralichthys olivaceus (Temminck & Schlegel, 1846)	4.5	Fisheries: highly commercial; aquaculture: commercial
			Flowery flounder	Bothus mancus (Broussonet, 1782)	4.4	Fisheries: commercial; aquarium: commercial
			Indo-Pacific oval flounder	Bothus myriaster (Temminck & Schlegel, 1846)	3.5	Fisheries: commercial
			Leopard flounder	Bothus pantherinus (Rüppell, 1830)	3.5	Fisheries: commercial
			Largescale flounder	Engyprosopon grandisquama (Temminck & Schlegel, 1846)	3.1	Fisheries: commercial
			Wide-eyed flounder	Bothus podas (Delaroche, 1809)	3.4	Fisheries: commercial; aquarium: commercial
			Black flounder	Rhombosolea retiaria Hutton, 1874	3.1	Fisheries: commercial; gamefish: yes
			Longsnout flounder	Ammotretis rostratus Günther, 1862	3.1	Fisheries: commercial
C63	Flatfishes nei	Atlantic, Northwest	Atlantic halibut	Hippoglossus hippoglossus (Linnaeus, 1758)	4	Fisheries: commercial; aquaculture: experimental; gamefish: yes; aquarium: public aquariums	3.92857
			Greenland halibut	Reinhardtius hippoglossoides (Walbaum, 1792)	4.4	Fisheries: highly commercial
			Winter flounder	Pseudopleuronectes americanus (Walbaum, 1792)	3.6	Fisheries: commercial; aquaculture: experimental; gamefish: yes
			American plaice	Hippoglossoides platessoides (Fabricius, 1780)	4.1	Fisheries: highly commercial
			Summer flounder	Paralichthys dentatus (Linnaeus, 1766)	4.5	Fisheries: commercial; gamefish: yes
			Southern flounder	Paralichthys lethostigma Jordan & Gilbert, 1884	3.5	Fisheries: commercial; gamefish: yes
			Wide-eyed flounder	Bothus podas (Delaroche, 1809)	3.4	Fisheries: commercial; aquarium: commercial
C64	Flatfishes nei	Pacific, Northeast	Pacific halibut	Hippoglossus stenolepis Schmidt, 1904	4.1	Fisheries: highly commercial; gamefish: yes; aquarium: public aquariums	4.0125
			Greenland halibut	Reinhardtius hippoglossoides (Walbaum, 1792)	4.4	Fisheries: highly commercial
			Starry flounder	Platichthys stellatus (Pallas, 1787)	3.6	Fisheries: commercial; gamefish: yes
			Arrow-tooth flounder	Atheresthes stomias (Jordan & Gilbert, 1880)	4.2	Fisheries: highly commercial; gamefish: yes
			Kamchatka flounder	Atheresthes evermanni Jordan & Starks, 1904	4.3	Fisheries: commercial
			Alaska plaice	Pleuronectes quadrituberculatus Pallas, 1814	3.6	Fisheries: commercial
			California flounder	Paralichthys californicus (Ayres, 1859)	4.5	Fisheries: commercial; gamefish: yes
			Wide-eyed flounder	Bothus podas (Delaroche, 1809)	3.4	Fisheries: commercial; aquarium: commercial
C65	Flatfishes nei	Pacific, Southeast	Flowery flounder	Bothus mancus (Broussonet, 1782)	4.4	Fisheries: commercial; aquarium: commercial	3.9
			Wide-eyed flounder	Bothus podas (Delaroche, 1809)	3.4	Fisheries: commercial; aquarium: commercial
C66	Flatfishes nei	Mediterranean and Black Sea	Wide-eyed flounder	Bothus podas (Delaroche, 1809)	3.4	Fisheries: commercial; aquarium: commercial	4.125
			Megrim	Lepidorhombus whiffiagonis (Walbaum, 1792)	4.3	Fisheries: highly commercial
			Turbot	Scophthalmus maximus (Linnaeus, 1758)	4.4	Fisheries: commercial; aquaculture: commercial; gamefish: yes; aquarium: public aquariums
			Brill	Scophthalmus rhombus (Linnaeus, 1758)	4.4	Fisheries: commercial; gamefish: yes
C67	Flatfishes nei	Indian Ocean, Western	Natal flounders	Pseudorhombus natalensis Gilchrist, 1904	3.5	Fisheries: commercial	3.65
			Three spotted flounders	Pseudorhombus triocellatus (Bloch & Schneider, 1801)	3.5	Fisheries: commercial; aquarium: public aquariums
			Deep flounder	Pseudorhombus elevatus Ogilby, 1912	3.5	Fisheries: commercial
			Javan flounder	Pseudorhombus javanicus (Bleeker, 1853)	3.5	Fisheries: commercial
			Malayan flounder	Pseudorhombus malayanus Bleeker, 1865	3.5	Fisheries: commercial
			Indian halibut	Psettodes erumei (Bloch & Schneider, 1801)	4.4	Fisheries: commercial
			Largetooth flounder	Pseudorhombus arsius (Hamilton, 1822)	4.2	Fisheries: commercial; gamefish: yes
			Natal flounders	Pseudorhombus natalensis Gilchrist, 1904	3.5	Fisheries: commercial
			Flowery flounder	Bothus mancus (Broussonet, 1782)	4.4	Fisheries: commercial; aquarium: commercial
			Indo-Pacific oval flounder	Bothus myriaster (Temminck & Schlegel, 1846)	3.5	Fisheries: commercial
			Leopard flounder	Bothus pantherinus (Rüppell, 1830)	3.5	Fisheries: commercial
			Largescale flounder	Engyprosopon grandisquama (Temminck & Schlegel, 1846)	3.1	Fisheries: commercial
			Wide-eyed flounder	Bothus podas (Delaroche, 1809)	3.4	Fisheries: commercial; aquarium: commercial
			Cape scaldfish	Arnoglossus capensis Boulenger, 1898	3.6	Fisheries: commercial
C68	Flatfishes nei	Atlantic, Northeast	European plaice	Pleuronectes platessa Linnaeus, 1758	3.2	Fisheries: highly commercial; aquaculture: commercial; gamefish: yes; aquarium: public aquariums	3.91111
			Atlantic halibut	Hippoglossus hippoglossus (Linnaeus, 1758)	4	Fisheries: commercial; aquaculture: experimental; gamefish: yes; aquarium: public aquariums
			Greenland halibut	Reinhardtius hippoglossoides (Walbaum, 1792)	4.4	Fisheries: highly commercial
			Common dab	Limanda limanda (Linnaeus, 1758)	3	Fisheries: commercial
			American plaice	Hippoglossoides platessoides (Fabricius, 1780)	4.1	Fisheries: highly commercial
			Wide-eyed flounder	Bothus podas (Delaroche, 1809)	3.4	Fisheries: commercial; aquarium: commercial
			Megrim	Lepidorhombus whiffiagonis (Walbaum, 1792)	4.3	Fisheries: highly commercial
			Turbot	Scophthalmus maximus (Linnaeus, 1758)	4.4	Fisheries: commercial; aquaculture: commercial; gamefish: yes; aquarium: public aquariums
			Brill	Scophthalmus rhombus (Linnaeus, 1758)	4.4	Fisheries: commercial; gamefish: yes
C69	Flatfishes nei	Indian Ocean, Eastern	Five-eyed flounder	Pseudorhombus quinquocellatus Weber & de Beaufort, 1929	3.5	Fisheries: commercial	3.66667
			Three spotted flounders	Pseudorhombus triocellatus (Bloch & Schneider, 1801)	3.5	Fisheries: commercial; aquarium: public aquariums
			Deep flounder	Pseudorhombus elevatus Ogilby, 1912	3.5	Fisheries: commercial
			Javan flounder	Pseudorhombus javanicus (Bleeker, 1853)	3.5	Fisheries: commercial
			Malayan flounder	Pseudorhombus malayanus Bleeker, 1865	3.5	Fisheries: commercial
			Indian halibut	Psettodes erumei (Bloch & Schneider, 1801)	4.4	Fisheries: commercial
			Largetooth flounder	Pseudorhombus arsius (Hamilton, 1822)	4.2	Fisheries: commercial; gamefish: yes
			Flowery flounder	Bothus mancus (Broussonet, 1782)	4.4	Fisheries: commercial; aquarium: commercial
			Indo-Pacific oval flounder	Bothus myriaster (Temminck & Schlegel, 1846)	3.5	Fisheries: commercial
			Leopard flounder	Bothus pantherinus (Rüppell, 1830)	3.5	Fisheries: commercial
			Largescale flounder	Engyprosopon grandisquama (Temminck & Schlegel, 1846)	3.1	Fisheries: commercial
			Wide-eyed flounder	Bothus podas (Delaroche, 1809)	3.4	Fisheries: commercial; aquarium: commercial
C70	Flatfishes nei	Pacific, Northwest	Pacific halibut	Hippoglossus stenolepis Schmidt, 1904	4.1	Fisheries: highly commercial; gamefish: yes; aquarium: public aquariums	3.94286
			Greenland halibut	Reinhardtius hippoglossoides (Walbaum, 1792)	4.4	Fisheries: highly commercial
			Starry flounder	Platichthys stellatus (Pallas, 1787)	3.6	Fisheries: commercial; gamefish: yes
			Arrow-tooth flounder	Atheresthes stomias (Jordan & Gilbert, 1880)	4.2	Fisheries: highly commercial; gamefish: yes
			Kamchatka flounder	Atheresthes evermanni Jordan & Starks, 1904	4.3	Fisheries: commercial
			Alaska plaice	Pleuronectes quadrituberculatus Pallas, 1814	3.6	Fisheries: commercial
			Wide-eyed flounder	Bothus podas (Delaroche, 1809)	3.4	Fisheries: commercial; aquarium: commercial
C71	Flatheads nei	Indo-Pacific, Southwest	Spotted flathead	Cociella punctata (Cuvier, 1829)	3.8	Fisheries: minor commercial	3.76
			Fringe-eyed flathead	Cymbacephalus nematophthalmus (Günther, 1860)	4	Fisheries: subsistence fisheries
			Dwarf flathead	Elates ransonnettii (Steindachner, 1876)	4.1	Fisheries: minor commercial
			Rough flathead	Grammoplites scaber (Linnaeus, 1758)	3.8	Fisheries: minor commercial
			Japanese flathead	Inegocia japonica (Cuvier, 1829)	3.7	Fisheries: minor commercial
			Spiny flathead	Kumococius rodericensis (Cuvier, 1829)	3.7	Fisheries: minor commercial
			Bartail flathead	Platycephalus indicus (Linnaeus, 1758)	3.6	Fisheries: commercial; aquaculture: commercial; gamefish: yes
			Olive-tailed flathead	Rogadius asper (Cuvier, 1829)	3.6	Fisheries: minor commercial
			Tuberculated flathead	Sorsogona tuberculata (Cuvier, 1829)	3.6	Fisheries: minor commercial
			Large-spined flathead	Suggrundus macracanthus (Bleeker, 1869)	3.7	Fisheries: minor commercial
C72	Flyingfishes nei	Atlantic, Southwest, Western Centra	Margined flyingfish	Cheilopogon cyanopterus (Valenciennes, 1847)	3.3	Fisheries: minor commercial	3.35714
			Bennett's flyingfish	Cheilopogon pinnatibarbatus (Bennett, 1831)	4	Fisheries: minor commercial
			Tropical two-wing flyingfish	Exocoetus volitans Linnaeus, 1758	3	Fisheries: commercial
			Fourwing flyingfish	Hirundichthys affinis (Günther, 1866)	3.8	Fisheries: commercial; bait: usually
			Black wing flyingfish	Hirundichthys rondeletii (Valenciennes, 1847)	3	Fisheries: commercial
			Mirrorwing flyingfish	Hirundichthys speculiger (Valenciennes, 1847)	3	Fisheries: minor commercial
			Sailfin flyingfish	Parexocoetus brachypterus (Richardson, 1846)	3.4	Fisheries: minor commercial
C73	Flyingfishes nei	Atlantic, Eastern Central	Margined flyingfish	Cheilopogon cyanopterus (Valenciennes, 1847)	3.3	Fisheries: minor commercial	3.36667
			Bennett's flyingfish	Cheilopogon pinnatibarbatus (Bennett, 1831)	4	Fisheries: minor commercial
			Tropical two-wing flyingfish	Exocoetus volitans Linnaeus, 1758	3	Fisheries: commercial
			Sharpchin flyingfish	Fodiator acutus (Valenciennes, 1847)	3.4	Fisheries: commercial
			Fourwing flyingfish	Hirundichthys affinis (Günther, 1866)	3.8	Fisheries: commercial; bait: usually
			Black wing flyingfish	Hirundichthys rondeletii (Valenciennes, 1847)	3	Fisheries: commercial
			Mirrorwing flyingfish	Hirundichthys speculiger (Valenciennes, 1847)	3	Fisheries: minor commercial
			Sailfin flyingfish	Parexocoetus brachypterus (Richardson, 1846)	3.4	Fisheries: minor commercial
			Bluntnose flyingfish	Prognichthys gibbifrons (Valenciennes, 1847)	3.4	Fisheries: minor commercial
C74	Flyingfishes nei	Pacific, Southeast, Eastern Central	Glider flyingfish	Cheilopogon atrisignis (Jenkins, 1903)	3.7	Fisheries: minor commercial	3.25
			Tropical two-wing flyingfish	Exocoetus volitans Linnaeus, 1758	3	Fisheries: commercial
			Sharpchin flyingfish	Fodiator acutus (Valenciennes, 1847)	3.4	Fisheries: commercial
			Black wing flyingfish	Hirundichthys rondeletii (Valenciennes, 1847)	3	Fisheries: commercial
			Mirrorwing flyingfish	Hirundichthys speculiger (Valenciennes, 1847)	3	Fisheries: minor commercial
			Sailfin flyingfish	Parexocoetus brachypterus (Richardson, 1846)	3.4	Fisheries: minor commercial
C75	Flyingfishes nei	Indian Ocean	Glider flyingfish	Cheilopogon atrisignis (Jenkins, 1903)	3.7	Fisheries: minor commercial	3.41
			Margined flyingfish	Cheilopogon cyanopterus (Valenciennes, 1847)	3.3	Fisheries: minor commercial
			Pharao flyingfish	Cypselurus naresii (Günther, 1889)	4	Fisheries: minor commercial
			Largescale flyingfish	Cypselurus oligolepis (Bleeker, 1865)	4	Fisheries: minor commercial
			Yellowing flyingfish	Cypselurus poecilopterus (Valenciennes, 1847)	3.4	Fisheries: minor commercial; gamefish: yes
			Tropical two-wing flyingfish	Exocoetus volitans Linnaeus, 1758	3	Fisheries: commercial
			Black wing flyingfish	Hirundichthys rondeletii (Valenciennes, 1847)	3	Fisheries: commercial
			Mirrorwing flyingfish	Hirundichthys speculiger (Valenciennes, 1847)	3	Fisheries: minor commercial
			Sailfin flyingfish	Parexocoetus brachypterus (Richardson, 1846)	3.4	Fisheries: minor commercial
			African sailfin flyingfish	Parexocoetus mento (Valenciennes, 1847)	3.3	Fisheries: minor commercial
C76	Flyingfishes nei	Pacific, Northwest, Western Central	Glider flyingfish	Cheilopogon atrisignis (Jenkins, 1903)	3.7	Fisheries: minor commercial	3.46364
			Margined flyingfish	Cheilopogon cyanopterus (Valenciennes, 1847)	3.3	Fisheries: minor commercial
			Bennett's flyingfish	Cheilopogon pinnatibarbatus (Bennett, 1831)	4	Fisheries: minor commercial
			Pharao flyingfish	Cypselurus naresii (Günther, 1889)	4	Fisheries: minor commercial
			Largescale flyingfish	Cypselurus oligolepis (Bleeker, 1865)	4	Fisheries: minor commercial
			Yellowing flyingfish	Cypselurus poecilopterus (Valenciennes, 1847)	3.4	Fisheries: minor commercial; gamefish: yes
			Tropical two-wing flyingfish	Exocoetus volitans Linnaeus, 1758	3	Fisheries: commercial
			Black wing flyingfish	Hirundichthys rondeletii (Valenciennes, 1847)	3	Fisheries: commercial
			Mirrorwing flyingfish	Hirundichthys speculiger (Valenciennes, 1847)	3	Fisheries: minor commercial
			Sailfin flyingfish	Parexocoetus brachypterus (Richardson, 1846)	3.4	Fisheries: minor commercial
			African sailfin flyingfish	Parexocoetus mento (Valenciennes, 1847)	3.3	Fisheries: minor commercial
C77	Fusiliers nei	Indo-West Pacific	Blue and gold fusilier	Caesio caerulaurea Lacepède, 1801	3.4	Fisheries: commercial; bait: occasionally	3.4
			Lunar fusilier	Caesio lunaris Cuvier, 1830	3.4	Fisheries: minor commercial
			Yellow and blueback fusilier	Caesio teres Seale, 1906	3.4	Fisheries: minor commercial
			Slender fusilier	Gymnocaesio gymnoptera (Bleeker, 1856)	3.4	Fisheries: minor commercial; bait: usually
			Goldband fusilier	Pterocaesio chrysozona (Cuvier, 1830)	3.4	Fisheries: commercial; bait: usually
			Banana fusilier	Pterocaesio pisang (Bleeker, 1853)	3.4	Fisheries: commercial; bait: usually
C78	Gadiformes nei	Atlantic, Southwest	Brazilian codling	Urophycis brasiliensis (Kaup, 1858)	3.9	Fisheries: commercial	3.8
			Ridge scaled rattail	Macrourus carinatus (Günther, 1878)	3.7	Fisheries: commercial
C79	Gadiformes nei	Pacific, Southwest, Western Central	Blue grenadier	Macruronus novaezelandiae (Hector, 1871)	4.5	Fisheries: highly commercial	4.1
			Ridge scaled rattail	Macrourus carinatus (Günther, 1878)	3.7	Fisheries: commercial
C80	Gadiformes nei	Pacific, Northwest	Polar cod	Boreogadus saida (Lepechin, 1774)	3.1	Fisheries: highly commercial	3.925
			Saffron cod	Eleginus gracilis (Tilesius, 1810)	4.1	Fisheries: highly commercial
			Pacific cod	Gadus macrocephalus Tilesius, 1810	4.2	Fisheries: highly commercial; gamefish: yes
			Giant grenadier	Albatrossia pectoralis (Gilbert, 1892)	4.3	Fisheries: commercial
C81	Gadiformes nei	Atlantic, Northeast	Polar cod	Boreogadus saida (Lepechin, 1774)	3.1	Fisheries: highly commercial	3.9625
			Atlantic cod	Gadus morhua Linnaeus, 1758	4.1	Fisheries: highly commercial; aquaculture: commercial; gamefish: yes
			Haddock	Melanogrammus aeglefinus (Linnaeus, 1758)	4	Fisheries: highly commercial; aquaculture: experimental; gamefish: yes
			Pollack	Pollachius pollachius (Linnaeus, 1758)	4.3	Fisheries: commercial; gamefish: yes
			Saithe	Pollachius virens (Linnaeus, 1758)	4.3	Fisheries: highly commercial; gamefish: yes
			European hake	Merluccius merluccius (Linnaeus, 1758)	4.4	Fisheries: highly commercial
			Roughhead grenadier	Macrourus berglax Lacepède, 1801	3.8	Fisheries: commercial
			Roundnose grenadier	Coryphaenoides rupestris Gunnerus, 1765	3.7	Fisheries: commercial
C82	Gadiformes nei	Atlantic, Southeast	Deep-water Cape hake	Merluccius paradoxus Franca, 1960	4.9	Fisheries: highly commercial	4.3
			Ridge scaled rattail	Macrourus carinatus (Günther, 1878)	3.7	Fisheries: commercial
C83	Gadiformes nei	Atlantic, Northwest	Polar cod	Boreogadus saida (Lepechin, 1774)	3.1	Fisheries: highly commercial	3.875
			Atlantic cod	Gadus morhua Linnaeus, 1758	4.1	Fisheries: highly commercial; aquaculture: commercial; gamefish: yes
			Haddock	Melanogrammus aeglefinus (Linnaeus, 1758)	4	Fisheries: highly commercial; aquaculture: experimental; gamefish: yes
			Saithe	Pollachius virens (Linnaeus, 1758)	4.3	Fisheries: highly commercial; gamefish: yes
			Red hake	Urophycis chuss (Walbaum, 1792)	3.7	Fisheries: commercial; gamefish: yes
			White hake	Urophycis tenuis (Mitchill, 1814)	4.3	Fisheries: highly commercial; gamefish: yes
			Roughhead grenadier	Macrourus berglax Lacepède, 1801	3.8	Fisheries: commercial
			Roundnose grenadier	Coryphaenoides rupestris Gunnerus, 1765	3.7	Fisheries: commercial
C84	Gadiformes nei	Pacific, Southeast, Eastern Central	Southern hake	Merluccius australis (Hutton, 1872)	4.5	Fisheries: highly commercial	4.225
			South Pacific hake	Merluccius gayi (Guichenot, 1848)	4.3	Fisheries: highly commercial
			Peruvian hake	Merluccius peruanus Ginsburg, 1954	4.4	Fisheries: highly commercial
			Ridge scaled rattail	Macrourus carinatus (Günther, 1878)	3.7	Fisheries: commercial
C85	Goatfishes, red mullets nei	Pacific, Northwest, Western Central	Gold-saddle goatfish	Parupeneus cyclostomus (Lacepède, 1801)	4.2	Fisheries: commercial; gamefish: yes; aquarium: commercial	3.675
			Cinnabar goatfish	Parupeneus heptacanthus (Lacepède, 1802)	3.4	Fisheries: commercial
			Indian goatfish	Parupeneus indicus (Shaw, 1803)	3.5	Fisheries: commercial; gamefish: yes
			Freckled goatfish	Upeneus tragula Richardson, 1846	3.6	Fisheries: commercial; aquarium: commercial
C86	Goatfishes, red mullets nei	Atlantic, Eastern Central	Red mullet	Mullus barbatus Linnaeus, 1758	3.1	Fisheries: commercial; gamefish: yes	3.26667
			Surmullet	Mullus surmuletus Linnaeus, 1758	3.5	Fisheries: commercial; gamefish: yes
			West African goatfish	Pseudupeneus prayensis (Cuvier, 1829)	3.2	Fisheries: commercial
C87	Grenadiers, rattails nei	Pacific, Northwest	Giant grenadier	Albatrossia pectoralis (Gilbert, 1892)	4.3	Fisheries: commercial	3.9
			Pacific grenadier	Coryphaenoides acrolepis (Bean, 1884)	3.8	Fisheries: commercial
			Popeye grenadier	Coryphaenoides cinereus (Gilbert, 1896)	3.6	Fisheries: minor commercial
C88	Groupers nei	Atlantic, Northeast, Mediterranean and Black Sea	White grouper	Epinephelus aeneus (Geoffroy Saint-Hilaire, 1817)	4	Fisheries: commercial; aquaculture: experimental; gamefish: yes	4.05
			Mottled grouper	Mycteroperca rubra (Bloch, 1793)	4.1	Fisheries: minor commercial
C89	Groupers nei	Atlantic, Western Central	Graysby	Cephalopholis cruentata (Lacepède, 1802)	4.3	Fisheries: minor commercial	4.09286
			Coney	Cephalopholis fulva (Linnaeus, 1758)	4.1	Fisheries: commercial; aquarium: commercial
			Marbled grouper	Dermatolepis inermis (Valenciennes, 1833)	4.5	Fisheries: minor commercial
			Rock hind	Epinephelus adscensionis (Osbeck, 1765)	3.5	Fisheries: highly commercial; gamefish: yes
			Red hind	Epinephelus guttatus (Linnaeus, 1758)	3.8	Fisheries: highly commercial; gamefish: yes
			Atlantic goliath grouper	Epinephelus itajara (Lichtenstein, 1822)	4.1	Fisheries: minor commercial; gamefish: yes
			Red grouper	Epinephelus morio (Valenciennes, 1828)	3.5	Fisheries: commercial; gamefish: yes; aquarium: public aquariums
			Nassau grouper	Epinephelus striatus (Bloch, 1792)	4.1	Fisheries: commercial; gamefish: yes; aquarium: public aquariums
			Yellowedge grouper	Hyporthodus flavolimbatus (Poey, 1865)	3.8	Fisheries: commercial; gamefish: yes
			Misty grouper	Hyporthodus mystacinus (Poey, 1852)	4.6	Fisheries: commercial; gamefish: yes
			Warsaw grouper	Hyporthodus nigritus (Holbrook, 1855)	4	Fisheries: commercial; gamefish: yes
			Snowy grouper	Hyporthodus niveatus (Valenciennes, 1828)	4	Fisheries: commercial
			Tiger grouper	Mycteroperca tigris (Valenciennes, 1833)	4.5	Fisheries: commercial; aquarium: public aquariums
			Yellowfin grouper	Mycteroperca venenosa (Linnaeus, 1758)	4.5	Fisheries: highly commercial; gamefish: yes; aquarium: public aquariums
C90	Groupers nei	Indian Ocean, Western	Redmouth grouper	Aethaloperca rogaa (Forsskål, 1775)	4.2	Fisheries: minor commercial; gamefish: yes	4.01429
			Peacock hind	Cephalopholis argus Schneider, 1801	4.5	Fisheries: commercial; gamefish: yes; aquarium: commercial
			Coral hind	Cephalopholis miniata (Forsskål, 1775)	4.3	Fisheries: commercial; gamefish: yes; aquarium: commercial
			Tomato hind	Cephalopholis sonnerati (Valenciennes, 1828)	3.8	Fisheries: commercial
			Areolate grouper	Epinephelus areolatus (Forsskål, 1775)	3.7	Fisheries: commercial; aquaculture: commercial
			Duskytail grouper	Epinephelus bleekeri (Vaillant, 1878)	3.9	Fisheries: minor commercial; aquaculture: commercial
			Brownspotted grouper	Epinephelus chlorostigma (Valenciennes, 1828)	4	Fisheries: commercial
			Whitespotted grouper	Epinephelus coeruleopunctatus (Bloch, 1790)	3.7	Fisheries: minor commercial
			Orange-spotted grouper	Epinephelus coioides (Hamilton, 1822)	4	Fisheries: commercial; aquaculture: commercial
			Spinycheek grouper	Epinephelus diacanthus (Valenciennes, 1828)	3.8	Fisheries: commercial
			Blacktip grouper	Epinephelus fasciatus (Forsskål, 1775)	3.7	Fisheries: commercial; gamefish: yes; aquarium: commercial
			Brown-marbled grouper	Epinephelus fuscoguttatus (Forsskål, 1775)	4.1	Fisheries: minor commercial; aquaculture: commercial; aquarium: commercial
			Striped grouper	Epinephelus latifasciatus (Temminck & Schlegel, 1842)	4	Fisheries: commercial
			Snubnose grouper	Epinephelus macrospilos (Bleeker, 1855)	3.8	Fisheries: commercial
			Speckled grouper	Epinephelus magniscuttis Postel, Fourmanoir & Guézé, 1963	4.1	Fisheries: commercial
			Malabar grouper	Epinephelus malabaricus (Bloch & Schneider, 1801)	4.2	Fisheries: highly commercial; aquaculture: commercial; gamefish: yes
			Netfin grouper	Epinephelus miliaris (Valenciennes, 1830)	3.8	Fisheries: minor commercial
			Comet grouper	Epinephelus morrhua (Valenciennes, 1833)	4	Fisheries: minor commercial; gamefish: yes
			White-streaked grouper	Epinephelus ongus (Bloch, 1790)	4	Fisheries: minor commercial
			Camouflage grouper	Epinephelus polyphekadion (Bleeker, 1849)	4	Fisheries: commercial; aquaculture: experimental
			Oblique-banded grouper	Epinephelus radiatus (Day, 1868)	4	Fisheries: minor commercial
			Greasy grouper	Epinephelus tauvina (Forsskål, 1775)	4.1	Fisheries: minor commercial; aquaculture: commercial; gamefish: yes
			Wavy-lined grouper	Epinephelus undulosus (Quoy & Gaimard, 1824)	3.7	Fisheries: minor commercial
			Masked grouper	Gracila albomarginata (Fowler & Bean, 1930)	4.2	Fisheries: minor commercial; gamefish: yes
			Eightbar grouper	Hyporthodus octofasciatus (Griffin, 1926)	4	Fisheries: minor commercial
			Squaretail coralgrouper	Plectropomus areolatus (Rüppell, 1830)	4.5	Fisheries: minor commercial
			Blacksaddled coralgrouper	Plectropomus laevis (Lacepède, 1801)	4.1	Fisheries: commercial; gamefish: yes
			Roving coralgrouper	Plectropomus pessuliferus (Fowler, 1904)	4.2	Fisheries: commercial; gamefish: yes
C91	Groupers nei	Atlantic, Southwest	Coney	Cephalopholis fulva (Linnaeus, 1758)	4.1	Fisheries: commercial; aquarium: commercial	4.08
			Marbled grouper	Dermatolepis inermis (Valenciennes, 1833)	4.5	Fisheries: minor commercial
			Rock hind	Epinephelus adscensionis (Osbeck, 1765)	3.5	Fisheries: highly commercial; gamefish: yes
			Atlantic goliath grouper	Epinephelus itajara (Lichtenstein, 1822)	4.1	Fisheries: minor commercial; gamefish: yes
			Red grouper	Epinephelus morio (Valenciennes, 1828)	3.5	Fisheries: commercial; gamefish: yes; aquarium: public aquariums
			Nassau grouper	Epinephelus striatus (Bloch, 1792)	4.1	Fisheries: commercial; gamefish: yes; aquarium: public aquariums
			Warsaw grouper	Hyporthodus nigritus (Holbrook, 1855)	4	Fisheries: commercial; gamefish: yes
			Snowy grouper	Hyporthodus niveatus (Valenciennes, 1828)	4	Fisheries: commercial
			Tiger grouper	Mycteroperca tigris (Valenciennes, 1833)	4.5	Fisheries: commercial; aquarium: public aquariums
			Yellowfin grouper	Mycteroperca venenosa (Linnaeus, 1758)	4.5	Fisheries: highly commercial; gamefish: yes; aquarium: public aquariums
C92	Groupers nei	Pacific, Western Central, Northwest, Southwest	Redmouth grouper	Aethaloperca rogaa (Forsskål, 1775)	4.2	Fisheries: minor commercial; gamefish: yes	4.00571
			Peacock hind	Cephalopholis argus Schneider, 1801	4.5	Fisheries: commercial; gamefish: yes; aquarium: commercial
			Coral hind	Cephalopholis miniata (Forsskål, 1775)	4.3	Fisheries: commercial; gamefish: yes; aquarium: commercial
			Tomato hind	Cephalopholis sonnerati (Valenciennes, 1828)	3.8	Fisheries: commercial
			Humpback grouper	Cromileptes altivelis (Valenciennes, 1828)	4.5	Fisheries: commercial; aquaculture: commercial; aquarium: commercial
			Banded grouper	Epinephelus amblycephalus (Bleeker, 1857)	3.8	Fisheries: minor commercial
			Areolate grouper	Epinephelus areolatus (Forsskål, 1775)	3.7	Fisheries: commercial; aquaculture: commercial
			Duskytail grouper	Epinephelus bleekeri (Vaillant, 1878)	3.9	Fisheries: minor commercial; aquaculture: commercial
			Longtooth grouper	Epinephelus bruneus Bloch, 1793	4	Fisheries: commercial; aquaculture: commercial; gamefish: yes
			Brownspotted grouper	Epinephelus chlorostigma (Valenciennes, 1828)	4	Fisheries: commercial
			Whitespotted grouper	Epinephelus coeruleopunctatus (Bloch, 1790)	3.7	Fisheries: minor commercial
			Orange-spotted grouper	Epinephelus coioides (Hamilton, 1822)	4	Fisheries: commercial; aquaculture: commercial
			Speckled blue grouper	Epinephelus cyanopodus (Richardson, 1846)	4.1	Fisheries: minor commercial; aquarium: public aquariums
			Cloudy grouper	Epinephelus erythrurus (Valenciennes, 1828)	3.8	Fisheries: minor commercial
			Rock grouper	Epinephelus fasciatomaculosus (Peters, 1865)	3.6	Fisheries: commercial
			Blacktip grouper	Epinephelus fasciatus (Forsskål, 1775)	3.7	Fisheries: commercial; gamefish: yes; aquarium: commercial
			Brown-marbled grouper	Epinephelus fuscoguttatus (Forsskål, 1775)	4.1	Fisheries: minor commercial; aquaculture: commercial; aquarium: commercial
			Bridled grouper	Epinephelus heniochus Fowler, 1904	3.8	Fisheries: commercial
			Striped grouper	Epinephelus latifasciatus (Temminck & Schlegel, 1842)	4	Fisheries: commercial
			Snubnose grouper	Epinephelus macrospilos (Bleeker, 1855)	3.8	Fisheries: commercial
			Speckled grouper	Epinephelus magniscuttis Postel, Fourmanoir & Guézé, 1963	4.1	Fisheries: commercial
			Malabar grouper	Epinephelus malabaricus (Bloch & Schneider, 1801)	4.2	Fisheries: highly commercial; aquaculture: commercial; gamefish: yes
			Netfin grouper	Epinephelus miliaris (Valenciennes, 1830)	3.8	Fisheries: minor commercial
			Comet grouper	Epinephelus morrhua (Valenciennes, 1833)	4	Fisheries: minor commercial; gamefish: yes
			White-streaked grouper	Epinephelus ongus (Bloch, 1790)	4	Fisheries: minor commercial
			Camouflage grouper	Epinephelus polyphekadion (Bleeker, 1849)	4	Fisheries: commercial; aquaculture: experimental
			Longfin grouper	Epinephelus quoyanus (Valenciennes, 1830)	4	Fisheries: commercial
			Oblique-banded grouper	Epinephelus radiatus (Day, 1868)	4	Fisheries: minor commercial
			Greasy grouper	Epinephelus tauvina (Forsskål, 1775)	4.1	Fisheries: minor commercial; aquaculture: commercial; gamefish: yes
			Wavy-lined grouper	Epinephelus undulosus (Quoy & Gaimard, 1824)	3.7	Fisheries: minor commercial
			Masked grouper	Gracila albomarginata (Fowler & Bean, 1930)	4.2	Fisheries: minor commercial; gamefish: yes
			Eightbar grouper	Hyporthodus octofasciatus (Griffin, 1926)	4	Fisheries: minor commercial
			Squaretail coralgrouper	Plectropomus areolatus (Rüppell, 1830)	4.5	Fisheries: minor commercial
			Blacksaddled coralgrouper	Plectropomus laevis (Lacepède, 1801)	4.1	Fisheries: commercial; gamefish: yes
			Roving coralgrouper	Plectropomus pessuliferus (Fowler, 1904)	4.2	Fisheries: commercial; gamefish: yes
C93	Groupers nei	Pacific, Southeast, Eastern Central	Spotted grouper	Epinephelus analogus Gill, 1863	3.8	Fisheries: minor commercial; gamefish: yes	4.06667
			Rooster hind	Hyporthodus acanthistius (Gilbert, 1892)	3.9	Fisheries: minor commercial
			Broomtail grouper	Mycteroperca xenarcha Jordan, 1888	4.5	Fisheries: minor commercial; gamefish: yes
C94	Groupers nei	Indian Ocean, Eastern	Redmouth grouper	Aethaloperca rogaa (Forsskål, 1775)	4.2	Fisheries: minor commercial; gamefish: yes	4.01176
			Peacock hind	Cephalopholis argus Schneider, 1801	4.5	Fisheries: commercial; gamefish: yes; aquarium: commercial
			Coral hind	Cephalopholis miniata (Forsskål, 1775)	4.3	Fisheries: commercial; gamefish: yes; aquarium: commercial
			Tomato hind	Cephalopholis sonnerati (Valenciennes, 1828)	3.8	Fisheries: commercial
			Humpback grouper	Cromileptes altivelis (Valenciennes, 1828)	4.5	Fisheries: commercial; aquaculture: commercial; aquarium: commercial
			Banded grouper	Epinephelus amblycephalus (Bleeker, 1857)	3.8	Fisheries: minor commercial
			Areolate grouper	Epinephelus areolatus (Forsskål, 1775)	3.7	Fisheries: commercial; aquaculture: commercial
			Duskytail grouper	Epinephelus bleekeri (Vaillant, 1878)	3.9	Fisheries: minor commercial; aquaculture: commercial
			Brownspotted grouper	Epinephelus chlorostigma (Valenciennes, 1828)	4	Fisheries: commercial
			Whitespotted grouper	Epinephelus coeruleopunctatus (Bloch, 1790)	3.7	Fisheries: minor commercial
			Orange-spotted grouper	Epinephelus coioides (Hamilton, 1822)	4	Fisheries: commercial; aquaculture: commercial
			Speckled blue grouper	Epinephelus cyanopodus (Richardson, 1846)	4.1	Fisheries: minor commercial; aquarium: public aquariums
			Cloudy grouper	Epinephelus erythrurus (Valenciennes, 1828)	3.8	Fisheries: minor commercial
			Blacktip grouper	Epinephelus fasciatus (Forsskål, 1775)	3.7	Fisheries: commercial; gamefish: yes; aquarium: commercial
			Brown-marbled grouper	Epinephelus fuscoguttatus (Forsskål, 1775)	4.1	Fisheries: minor commercial; aquaculture: commercial; aquarium: commercial
			Bridled grouper	Epinephelus heniochus Fowler, 1904	3.8	Fisheries: commercial
			Striped grouper	Epinephelus latifasciatus (Temminck & Schlegel, 1842)	4	Fisheries: commercial
			Snubnose grouper	Epinephelus macrospilos (Bleeker, 1855)	3.8	Fisheries: commercial
			Speckled grouper	Epinephelus magniscuttis Postel, Fourmanoir & Guézé, 1963	4.1	Fisheries: commercial
			Malabar grouper	Epinephelus malabaricus (Bloch & Schneider, 1801)	4.2	Fisheries: highly commercial; aquaculture: commercial; gamefish: yes
			Netfin grouper	Epinephelus miliaris (Valenciennes, 1830)	3.8	Fisheries: minor commercial
			Comet grouper	Epinephelus morrhua (Valenciennes, 1833)	4	Fisheries: minor commercial; gamefish: yes
			White-streaked grouper	Epinephelus ongus (Bloch, 1790)	4	Fisheries: minor commercial
			Camouflage grouper	Epinephelus polyphekadion (Bleeker, 1849)	4	Fisheries: commercial; aquaculture: experimental
			Oblique-banded grouper	Epinephelus radiatus (Day, 1868)	4	Fisheries: minor commercial
			Sixbar grouper	Epinephelus sexfasciatus (Valenciennes, 1828)	3.8	Fisheries: commercial
			Greasy grouper	Epinephelus tauvina (Forsskål, 1775)	4.1	Fisheries: minor commercial; aquaculture: commercial; gamefish: yes
			Wavy-lined grouper	Epinephelus undulosus (Quoy & Gaimard, 1824)	3.7	Fisheries: minor commercial
			Masked grouper	Gracila albomarginata (Fowler & Bean, 1930)	4.2	Fisheries: minor commercial; gamefish: yes
			Eightbar grouper	Hyporthodus octofasciatus (Griffin, 1926)	4	Fisheries: minor commercial
			Squaretail coralgrouper	Plectropomus areolatus (Rüppell, 1830)	4.5	Fisheries: minor commercial
			Blacksaddled coralgrouper	Plectropomus laevis (Lacepède, 1801)	4.1	Fisheries: commercial; gamefish: yes
			Highfin coralgrouper	Plectropomus oligacanthus (Bleeker, 1855)	4	Fisheries: minor commercial
			Roving coralgrouper	Plectropomus pessuliferus (Fowler, 1904)	4.2	Fisheries: commercial; gamefish: yes
C95	Groupers nei	Atlantic, Southeast, Eastern	Bluespotted seabass	Cephalopholis taeniops (Valenciennes, 1828)	4.4	Fisheries: minor commercial	4.1
			White grouper	Epinephelus aeneus (Geoffroy Saint-Hilaire, 1817)	4	Fisheries: commercial; aquaculture: experimental; gamefish: yes
			Atlantic goliath grouper	Epinephelus itajara (Lichtenstein, 1822)	4.1	Fisheries: minor commercial; gamefish: yes
			African red snapper	Lutjanus agennes Bleeker, 1863	4	Fisheries: minor commercial; gamefish: yes
			Gorean snapper	Lutjanus goreensis (Valenciennes, 1830)	4	Fisheries: minor commercial
			Mottled grouper	Mycteroperca rubra (Bloch, 1793)	4.1	Fisheries: minor commercial
C96	Grunts, sweetlips nei	Atlantic, Southeast, Atlantic, Eastern Central	Bigeye grunt	Brachydeuterus auritus (Valenciennes, 1832)	3	Fisheries: highly commercial	3.48
			Dara	Parakuhlia macrophthalmus (Osório, 1893)	3.4	Fisheries: commercial
			Guinean grunt	Parapristipoma humile (Bowdich, 1825)	3.6	Fisheries: commercial
			African striped grunt	Parapristipoma octolineatum (Valenciennes, 1833)	3.6	Fisheries: commercial
			Biglip grunt	Plectorhinchus macrolepis (Boulenger, 1899)	3.7	Fisheries: commercial
			Rubberlip grunt	Plectorhinchus mediterraneus (Guichenot, 1850)	3.5	Fisheries: commercial
			Bastard grunt	Pomadasys incisus (Bowdich, 1825)	3.8	Fisheries: minor commercial
			Sompat grunt	Pomadasys jubelini (Cuvier, 1830)	3.3	Fisheries: minor commercial
			Parrot grunt	Pomadasys perotaei (Cuvier, 1830)	3.3	Fisheries: commercial
			Pigsnout grunt	Pomadasys rogerii (Cuvier, 1830)	3.6	Fisheries: commercial
C97	Grunts, sweetlips nei	Atlantic, Western Central, Atlantic, Northwest	White margate	Haemulon album Cuvier, 1830	3.3	Fisheries: commercial; gamefish: yes; aquarium: public aquariums	3.42143
			Black grunt	Haemulon bonariense Cuvier, 1830	3.5	Fisheries: commercial; aquarium: public aquariums
			Caesar grunt	Haemulon carbonarium Poey, 1860	3.7	Fisheries: minor commercial; aquarium: public aquariums
			Smallmouth grunt	Haemulon chrysargyreum Günther, 1859	3.5	Fisheries: minor commercial; aquarium: public aquariums; bait: usually
			French grunt	Haemulon flavolineatum (Desmarest, 1823)	3.5	Fisheries: commercial; aquarium: public aquariums; bait: usually
			Spanish grunt	Haemulon macrostomum Günther, 1859	3.3	Fisheries: minor commercial; aquarium: public aquariums
			Cottonwick grunt	Haemulon melanurum (Linnaeus, 1758)	2.2	Fisheries: minor commercial; aquarium: public aquariums
			Sailor's grunt	Haemulon parra (Desmarest, 1823)	3.5	Fisheries: minor commercial; aquarium: public aquariums
			White grunt	Haemulon plumierii (Lacepède, 1801)	3.8	Fisheries: minor commercial; gamefish: yes; aquarium: public aquariums
			Bluestriped grunt	Haemulon sciurus (Shaw, 1803)	3.5	Fisheries: minor commercial; aquarium: public aquariums
			Chere-chere grunt	Haemulon steindachneri (Jordan & Gilbert, 1882)	3.7	Fisheries: minor commercial; aquarium: public aquariums; bait: usually
			Striped grunt	Haemulon striatum (Linnaeus, 1758)	3.4	Fisheries: minor commercial; aquarium: public aquariums
			Pigfish	Orthopristis chrysoptera (Linnaeus, 1766)	3.4	Fisheries: minor commercial; aquarium: public aquariums; bait: usually
			Corocoro grunt	Orthopristis rubra (Cuvier, 1830)	3.6	Fisheries: commercial
C98	Grunts, sweetlips nei	Indian Ocean, Western	Painted sweetlips	Diagramma pictum (Thunberg, 1792)	3.7	Fisheries: commercial; gamefish: yes; aquarium: commercial	3.68462
			Dusky rubberlip	Plectorhinchus chubbi (Regan, 1919)	3.9	Fisheries: commercial; gamefish: yes
			Crescent sweetlips	Plectorhinchus cinctus (Temminck & Schlegel, 1843)	3.5	Fisheries: commercial; aquaculture: commercial
			Harry hotlips	Plectorhinchus gibbosus (Lacepède, 1802)	3.6	Fisheries: commercial; gamefish: yes
			Yellowbanded sweetlips	Plectorhinchus lineatus (Linnaeus, 1758)	3.9	Fisheries: minor commercial; aquarium: commercial
			Trout sweetlips	Plectorhinchus pictus (Tortonese, 1936)	3.9	Fisheries: commercial; aquarium: commercial
			Sordid rubberlip	Plectorhinchus sordidus (Klunzinger, 1870)	4	Fisheries: commercial
			Harry hotlips	Plectorhinchus gibbosus (Lacepède, 1802)	3.6	Fisheries: commercial; gamefish: yes
			Yellowbanded sweetlips	Plectorhinchus lineatus (Linnaeus, 1758)	3.9	Fisheries: minor commercial; aquarium: commercial
			Trout sweetlips	Plectorhinchus pictus (Tortonese, 1936)	3.9	Fisheries: commercial; aquarium: commercial
			Smallspotted grunter	Pomadasys commersonnii (Lacepède, 1801)	3.5	Fisheries: commercial; gamefish: yes
			Olive grunt	Pomadasys olivaceus (Day, 1875)	2.6	Fisheries: commercial; bait: usually
			Minstrel sweetlips	Plectorhinchus schotaf (Forsskål, 1775)	3.9	Fisheries: commercial; gamefish: yes
C99	Grunts, sweetlips nei	Atlantic, Southwest	White margate	Haemulon album Cuvier, 1830	3.3	Fisheries: commercial; gamefish: yes; aquarium: public aquariums	3.41667
			Caesar grunt	Haemulon carbonarium Poey, 1860	3.7	Fisheries: minor commercial; aquarium: public aquariums
			Smallmouth grunt	Haemulon chrysargyreum Günther, 1859	3.5	Fisheries: minor commercial; aquarium: public aquariums; bait: usually
			French grunt	Haemulon flavolineatum (Desmarest, 1823)	3.5	Fisheries: commercial; aquarium: public aquariums; bait: usually
			Spanish grunt	Haemulon macrostomum Günther, 1859	3.3	Fisheries: minor commercial; aquarium: public aquariums
			Cottonwick grunt	Haemulon melanurum (Linnaeus, 1758)	2.2	Fisheries: minor commercial; aquarium: public aquariums
			Sailor's grunt	Haemulon parra (Desmarest, 1823)	3.5	Fisheries: minor commercial; aquarium: public aquariums
			White grunt	Haemulon plumierii (Lacepède, 1801)	3.8	Fisheries: minor commercial; gamefish: yes; aquarium: public aquariums
			Bluestriped grunt	Haemulon sciurus (Shaw, 1803)	3.5	Fisheries: minor commercial; aquarium: public aquariums
			Chere-chere grunt	Haemulon steindachneri (Jordan & Gilbert, 1882)	3.7	Fisheries: minor commercial; aquarium: public aquariums; bait: usually
			Striped grunt	Haemulon striatum (Linnaeus, 1758)	3.4	Fisheries: minor commercial; aquarium: public aquariums
			Corocoro grunt	Orthopristis rubra (Cuvier, 1830)	3.6	Fisheries: commercial
C100	Grunts, sweetlips nei	Pacific, Western Central	Painted sweetlips	Diagramma pictum (Thunberg, 1792)	3.7	Fisheries: commercial; gamefish: yes; aquarium: commercial	3.8
			Lined javelinfish	Hapalogenys kishinouyei Smith & Pope, 1906	4	Fisheries: commercial
			Harlequin sweetlips	Plectorhinchus chaetodonoides Lacepède, 1801	3.8	Fisheries: minor commercial; aquarium: commercial
			Dusky rubberlip	Plectorhinchus chubbi (Regan, 1919)	3.9	Fisheries: commercial; gamefish: yes
			Crescent sweetlips	Plectorhinchus cinctus (Temminck & Schlegel, 1843)	3.5	Fisheries: commercial; aquaculture: commercial
			Striped sweetlips	Plectorhinchus diagrammus (Linnaeus, 1758)	4	Fisheries: commercial; aquaculture: commercial
			Harry hotlips	Plectorhinchus gibbosus (Lacepède, 1802)	3.6	Fisheries: commercial; gamefish: yes
			Yellowbanded sweetlips	Plectorhinchus lineatus (Linnaeus, 1758)	3.9	Fisheries: minor commercial; aquarium: commercial
			Trout sweetlips	Plectorhinchus pictus (Tortonese, 1936)	3.9	Fisheries: commercial; aquarium: commercial
			Ribboned sweetlips	Plectorhinchus polytaenia (Bleeker, 1853)	4	Fisheries: commercial
			Chicken grunt	Parapristipoma trilineatum (Thunberg, 1793)	3.4	Fisheries: commercial
			Harry hotlips	Plectorhinchus gibbosus (Lacepède, 1802)	3.6	Fisheries: commercial; gamefish: yes
			Yellowbanded sweetlips	Plectorhinchus lineatus (Linnaeus, 1758)	3.9	Fisheries: minor commercial; aquarium: commercial
			Trout sweetlips	Plectorhinchus pictus (Tortonese, 1936)	3.9	Fisheries: commercial; aquarium: commercial
			Minstrel sweetlips	Plectorhinchus schotaf (Forsskål, 1775)	3.9	Fisheries: commercial; gamefish: yes
C101	Grunts, sweetlips nei	Pacific, Southeast	Yellowbanded sweetlips	Plectorhinchus lineatus (Linnaeus, 1758)	3.9	Fisheries: minor commercial; aquarium: commercial	3.86
			Grey grunt	Haemulon scudderii Gill, 1862	4.2	Fisheries: commercial
			Chere-chere grunt	Haemulon steindachneri (Jordan & Gilbert, 1882)	3.7	Fisheries: minor commercial; aquarium: public aquariums; bait: usually
			Harry hotlips	Plectorhinchus gibbosus (Lacepède, 1802)	3.6	Fisheries: commercial; gamefish: yes
			Yellowbanded sweetlips	Plectorhinchus lineatus (Linnaeus, 1758)	3.9	Fisheries: minor commercial; aquarium: commercial
C102	Grunts, sweetlips nei	Indian Ocean, Eastern	Painted sweetlips	Diagramma pictum (Thunberg, 1792)	3.7	Fisheries: commercial; gamefish: yes; aquarium: commercial	3.81429
			Lined javelinfish	Hapalogenys kishinouyei Smith & Pope, 1906	4	Fisheries: commercial
			Harlequin sweetlips	Plectorhinchus chaetodonoides Lacepède, 1801	3.8	Fisheries: minor commercial; aquarium: commercial
			Dusky rubberlip	Plectorhinchus chubbi (Regan, 1919)	3.9	Fisheries: commercial; gamefish: yes
			Crescent sweetlips	Plectorhinchus cinctus (Temminck & Schlegel, 1843)	3.5	Fisheries: commercial; aquaculture: commercial
			Harry hotlips	Plectorhinchus gibbosus (Lacepède, 1802)	3.6	Fisheries: commercial; gamefish: yes
			Yellowbanded sweetlips	Plectorhinchus lineatus (Linnaeus, 1758)	3.9	Fisheries: minor commercial; aquarium: commercial
			Trout sweetlips	Plectorhinchus pictus (Tortonese, 1936)	3.9	Fisheries: commercial; aquarium: commercial
			Ribboned sweetlips	Plectorhinchus polytaenia (Bleeker, 1853)	4	Fisheries: commercial
			Harlequin sweetlips	Plectorhinchus chaetodonoides Lacepède, 1801	3.8	Fisheries: minor commercial; aquarium: commercial
			Harry hotlips	Plectorhinchus gibbosus (Lacepède, 1802)	3.6	Fisheries: commercial; gamefish: yes
			Yellowbanded sweetlips	Plectorhinchus lineatus (Linnaeus, 1758)	3.9	Fisheries: minor commercial; aquarium: commercial
			Trout sweetlips	Plectorhinchus pictus (Tortonese, 1936)	3.9	Fisheries: commercial; aquarium: commercial
			Minstrel sweetlips	Plectorhinchus schotaf (Forsskål, 1775)	3.9	Fisheries: commercial; gamefish: yes
C103	Grunts, sweetlips nei	Pacific, Northwest	Painted sweetlips	Diagramma pictum (Thunberg, 1792)	3.7	Fisheries: commercial; gamefish: yes; aquarium: commercial	3.75833
			Dusky rubberlip	Plectorhinchus chubbi (Regan, 1919)	3.9	Fisheries: commercial; gamefish: yes
			Crescent sweetlips	Plectorhinchus cinctus (Temminck & Schlegel, 1843)	3.5	Fisheries: commercial; aquaculture: commercial
			Striped sweetlips	Plectorhinchus diagrammus (Linnaeus, 1758)	4	Fisheries: commercial; aquaculture: commercial
			Harry hotlips	Plectorhinchus gibbosus (Lacepède, 1802)	3.6	Fisheries: commercial; gamefish: yes
			Yellowbanded sweetlips	Plectorhinchus lineatus (Linnaeus, 1758)	3.9	Fisheries: minor commercial; aquarium: commercial
			Trout sweetlips	Plectorhinchus pictus (Tortonese, 1936)	3.9	Fisheries: commercial; aquarium: commercial
			Chicken grunt	Parapristipoma trilineatum (Thunberg, 1793)	3.4	Fisheries: commercial
			Harlequin sweetlips	Plectorhinchus chaetodonoides Lacepède, 1801	3.8	Fisheries: minor commercial; aquarium: commercial
			Harry hotlips	Plectorhinchus gibbosus (Lacepède, 1802)	3.6	Fisheries: commercial; gamefish: yes
			Yellowbanded sweetlips	Plectorhinchus lineatus (Linnaeus, 1758)	3.9	Fisheries: minor commercial; aquarium: commercial
			Trout sweetlips	Plectorhinchus pictus (Tortonese, 1936)	3.9	Fisheries: commercial; aquarium: commercial
C104	Grunts, sweetlips nei	Pacific, Eastern Central	Yellowbanded sweetlips	Plectorhinchus lineatus (Linnaeus, 1758)	3.9	Fisheries: minor commercial; aquarium: commercial	3.86
			Grey grunt	Haemulon scudderii Gill, 1862	4.2	Fisheries: commercial
			Chere-chere grunt	Haemulon steindachneri (Jordan & Gilbert, 1882)	3.7	Fisheries: minor commercial; aquarium: public aquariums; bait: usually
			Harry hotlips	Plectorhinchus gibbosus (Lacepède, 1802)	3.6	Fisheries: commercial; gamefish: yes
			Yellowbanded sweetlips	Plectorhinchus lineatus (Linnaeus, 1758)	3.9	Fisheries: minor commercial; aquarium: commercial
C105	Grunts, sweetlips nei	Atlantic, Northeast	Guinean grunt	Parapristipoma humile (Bowdich, 1825)	3.6	Fisheries: commercial	3.625
			African striped grunt	Parapristipoma octolineatum (Valenciennes, 1833)	3.6	Fisheries: commercial
			Rubberlip grunt	Plectorhinchus mediterraneus (Guichenot, 1850)	3.5	Fisheries: commercial
			Bastard grunt	Pomadasys incisus (Bowdich, 1825)	3.8	Fisheries: minor commercial
C106	Gurnards, searobins nei	Atlantic, Northeast, Eastern Central, Mediterranean and Black Sea	Piper gurnard	Trigla lyra Linnaeus, 1758	3.7	Fisheries: minor commercial	3.85
			Tub gurnard	Chelidonichthys lucerna (Linnaeus, 1758)	4	Fisheries: commercial; gamefish: yes; aquarium: public aquariums
C107	Gurnards, searobins nei	Atlantic, Southeast	Cape gurnard	Chelidonichthys capensis (Cuvier, 1829)	4.1	Fisheries: commercial	3.9
			Bluefin gurnard	Chelidonichthys kumu (Cuvier, 1829)	3.7	Fisheries: commercial
C108	Hairtails, scabbardfishes nei	Atlantic, Northeast, Eastern Central	Silver scabbardfish	Lepidopus caudatus (Euphrasen, 1788)	3.8	Fisheries: highly commercial; gamefish: yes	4.1
			Largehead hairtail	Trichiurus lepturus Linnaeus, 1758	4.4	Fisheries: highly commercial; gamefish: yes
C109	Hairtails, scabbardfishes nei	Pacific, Northwest	Longtooth hairtail	Eupleurogrammus glossodon (Bleeker, 1860)	4.5	Fisheries: commercial	4.3
			Smallhead hairtail	Eupleurogrammus muticus (Gray, 1831)	4.1	Fisheries: commercial
			Savalai hairtail	Lepturacanthus savala (Cuvier, 1829)	4.3	Fisheries: commercial
			Crested hairtail	Tentoriceps cristatus (Klunzinger, 1884)	4.2	Fisheries: minor commercial
			Largehead hairtail	Trichiurus lepturus Linnaeus, 1758	4.4	Fisheries: highly commercial; gamefish: yes
C110	Hairtails, scabbardfishes nei	Pacific, Southeast, Eastern Central	Pacific scabbardfish	Lepidopus fitchi Rosenblatt & Wilson, 1987	4.1	Fisheries: minor commercial	4.25
			Largehead hairtail	Trichiurus lepturus Linnaeus, 1758	4.4	Fisheries: highly commercial; gamefish: yes
C111	Hairtails, scabbardfishes nei	Indian Ocean, Eastern, Western	Longtooth hairtail	Eupleurogrammus glossodon (Bleeker, 1860)	4.5	Fisheries: commercial	4.3
			Smallhead hairtail	Eupleurogrammus muticus (Gray, 1831)	4.1	Fisheries: commercial
			Crested hairtail	Tentoriceps cristatus (Klunzinger, 1884)	4.2	Fisheries: minor commercial
			Largehead hairtail	Trichiurus lepturus Linnaeus, 1758	4.4	Fisheries: highly commercial; gamefish: yes
C112	Hairtails, scabbardfishes nei	Pacific, Western Central	Longtooth hairtail	Eupleurogrammus glossodon (Bleeker, 1860)	4.5	Fisheries: commercial	4.3
			Smallhead hairtail	Eupleurogrammus muticus (Gray, 1831)	4.1	Fisheries: commercial
			Savalai hairtail	Lepturacanthus savala (Cuvier, 1829)	4.3	Fisheries: commercial
			Crested hairtail	Tentoriceps cristatus (Klunzinger, 1884)	4.2	Fisheries: minor commercial
			Largehead hairtail	Trichiurus lepturus Linnaeus, 1758	4.4	Fisheries: highly commercial; gamefish: yes
C113	Hairtails, scabbardfishes nei	Pacific, Southwest	Silver scabbardfish	Lepidopus caudatus (Euphrasen, 1788)	3.8	Fisheries: highly commercial; gamefish: yes	4.21667
			Longtooth hairtail	Eupleurogrammus glossodon (Bleeker, 1860)	4.5	Fisheries: commercial
			Smallhead hairtail	Eupleurogrammus muticus (Gray, 1831)	4.1	Fisheries: commercial
			Savalai hairtail	Lepturacanthus savala (Cuvier, 1829)	4.3	Fisheries: commercial
			Crested hairtail	Tentoriceps cristatus (Klunzinger, 1884)	4.2	Fisheries: minor commercial
			Largehead hairtail	Trichiurus lepturus Linnaeus, 1758	4.4	Fisheries: highly commercial; gamefish: yes
C114	Hakes nei	Atlantic, Eastern Central	European hake	Merluccius merluccius (Linnaeus, 1758)	4.4	Fisheries: highly commercial	4.45
			Benguela hake	Merluccius polli Cadenat, 1950	4.5	Fisheries: minor commercial
C115	Halfbeaks nei	Indian Ocean, Eastern	Jumping halfbeak	Hemiramphus archipelagicus Collette & Parin, 1978	3.4	Fisheries: commercial	3.1
			Halfbeak	Hemiramphus convexus Weber & de Beaufort, 1922	3.3	Fisheries: minor commercial
			Black-barred halfbeak	Hemiramphus far (Forsskål, 1775)	2.9	Fisheries: commercial; gamefish: yes; bait: occasionally
			Dussumier's halfbeak	Hyporhamphus dussumieri (Valenciennes, 1847)	3.5	Fisheries: commercial
			Congaturi halfbeak	Hyporhamphus limbatus (Valenciennes, 1847)	3.1	Fisheries: minor commercial
			Southern garfish	Hyporhamphus melanochir (Valenciennes, 1847)	2.7	Fisheries: commercial; bait: usually
			Quoy's garfish	Hyporhamphus quoyi (Valenciennes, 1847)	3	Fisheries: minor commercial
			Long billed half beak	Rhynchorhamphus georgii (Valenciennes, 1847)	3.1	Fisheries: minor commercial
			Feathered river-garfish	Zenarchopterus dispar (Valenciennes, 1847)	2.9	Fisheries: commercial
C116	Halfbeaks nei	Pacific, Southwest	Wrestling halfbeak	Dermogenys pusilla Kuhl & van Hasselt, 1823	3.4	Fisheries: minor commercial; aquarium: commercial	3.17778
			Jumping halfbeak	Hemiramphus archipelagicus Collette & Parin, 1978	3.4	Fisheries: commercial
			Halfbeak	Hemiramphus convexus Weber & de Beaufort, 1922	3.3	Fisheries: minor commercial
			Black-barred halfbeak	Hemiramphus far (Forsskål, 1775)	2.9	Fisheries: commercial; gamefish: yes; bait: occasionally
			Dussumier's halfbeak	Hyporhamphus dussumieri (Valenciennes, 1847)	3.5	Fisheries: commercial
			Congaturi halfbeak	Hyporhamphus limbatus (Valenciennes, 1847)	3.1	Fisheries: minor commercial
			Quoy's garfish	Hyporhamphus quoyi (Valenciennes, 1847)	3	Fisheries: minor commercial
			Long billed half beak	Rhynchorhamphus georgii (Valenciennes, 1847)	3.1	Fisheries: minor commercial
			Feathered river-garfish	Zenarchopterus dispar (Valenciennes, 1847)	2.9	Fisheries: commercial
C117	Halfbeaks nei	Pacific, Western Central	Jumping halfbeak	Hemiramphus archipelagicus Collette & Parin, 1978	3.4	Fisheries: commercial	3.15
			Halfbeak	Hemiramphus convexus Weber & de Beaufort, 1922	3.3	Fisheries: minor commercial
			Black-barred halfbeak	Hemiramphus far (Forsskål, 1775)	2.9	Fisheries: commercial; gamefish: yes; bait: occasionally
			Dussumier's halfbeak	Hyporhamphus dussumieri (Valenciennes, 1847)	3.5	Fisheries: commercial
			Congaturi halfbeak	Hyporhamphus limbatus (Valenciennes, 1847)	3.1	Fisheries: minor commercial
			Quoy's garfish	Hyporhamphus quoyi (Valenciennes, 1847)	3	Fisheries: minor commercial
			Long billed half beak	Rhynchorhamphus georgii (Valenciennes, 1847)	3.1	Fisheries: minor commercial
			Feathered river-garfish	Zenarchopterus dispar (Valenciennes, 1847)	2.9	Fisheries: commercial
C118	Halfbeaks nei	Indian Ocean, Western	Jumping halfbeak	Hemiramphus archipelagicus Collette & Parin, 1978	3.4	Fisheries: commercial	3.12857
			Black-barred halfbeak	Hemiramphus far (Forsskål, 1775)	2.9	Fisheries: commercial; gamefish: yes; bait: occasionally
			Dussumier's halfbeak	Hyporhamphus dussumieri (Valenciennes, 1847)	3.5	Fisheries: commercial
			Congaturi halfbeak	Hyporhamphus limbatus (Valenciennes, 1847)	3.1	Fisheries: minor commercial
			Quoy's garfish	Hyporhamphus quoyi (Valenciennes, 1847)	3	Fisheries: minor commercial
			Long billed half beak	Rhynchorhamphus georgii (Valenciennes, 1847)	3.1	Fisheries: minor commercial
			Feathered river-garfish	Zenarchopterus dispar (Valenciennes, 1847)	2.9	Fisheries: commercial
C119	Halfbeaks nei	Atlantic, Western Central	Ballyhoo halfbeak	Hemiramphus brasiliensis (Linnaeus, 1758)	2.3	Fisheries: minor commercial; bait: usually	2.43333
			Slender halfbeak	Hyporhamphus roberti (Valenciennes, 1847)	3	Fisheries: minor commercial; bait: usually
			Common halfbeak	Hyporhamphus unifasciatus (Ranzani, 1841)	2	Fisheries: minor commercial; bait: usually
C120	Hammerhead sharks, etc. nei	Global	Scalloped hammerhead	Sphyrna lewini (Griffith & Smith, 1834)	4.1	Fisheries: commercial; gamefish: yes	4.5
			Smooth hammerhead	Sphyrna zygaena (Linnaeus, 1758)	4.9	Fisheries: commercial; gamefish: yes
C121	Jack and horse mackerel	Mediterranean and Black Sea	Blue jack mackerel	Trachurus picturatus (Bowdich, 1825)	3.3	Fisheries: commercial	3.6
			Mediterranean horse mackerel	Trachurus mediterraneus (Steindachner, 1868)	3.8	Fisheries: commercial; gamefish: yes
			Atlantic horse mackerel	Trachurus trachurus (Linnaeus, 1758)	3.7	Fisheries: highly commercial; gamefish: yes; bait: usually
C122	Jack and horse mackerel	Atlantic, Eastern Central	Blue jack mackerel	Trachurus picturatus (Bowdich, 1825)	3.3	Fisheries: commercial	3.5
			Atlantic horse mackerel	Trachurus trachurus (Linnaeus, 1758)	3.7	Fisheries: highly commercial; gamefish: yes; bait: usually
			Cunene horse mackerel	Trachurus trecae Cadenat, 1950	3.5	Fisheries: highly commercial
C123	Jack and horse mackerel	Atlantic, Northeast	Blue jack mackerel	Trachurus picturatus (Bowdich, 1825)	3.3	Fisheries: commercial	3.5
			Atlantic horse mackerel	Trachurus trachurus (Linnaeus, 1758)	3.7	Fisheries: highly commercial; gamefish: yes; bait: usually
C124	Jack and horse mackerel	Atlantic, Southeast	Blue jack mackerel	Trachurus picturatus (Bowdich, 1825)	3.3	Fisheries: commercial	3.5
			Atlantic horse mackerel	Trachurus trachurus (Linnaeus, 1758)	3.7	Fisheries: highly commercial; gamefish: yes; bait: usually
			Cape horse mackerel	Trachurus capensis Castelnau, 1861	3.5	Fisheries: highly commercial
			Cunene horse mackerel	Trachurus trecae Cadenat, 1950	3.5	Fisheries: highly commercial
C125	Jack and horse mackerel	Pacific, Southwest	Chilean jack mackerel	Trachurus murphyi Nichols, 1920	3.3	Fisheries: highly commercial	3.6
			Greenback horse mackerel	Trachurus declivis (Jenyns, 1841)	3.9	Fisheries: highly commercial; gamefish: yes; bait: usually
C126	Jacks, crevalles nei	Atlantic, Eastern Central	African pompano	Alectis ciliaris (Bloch, 1787)	4	Fisheries: minor commercial; gamefish: yes; aquarium: commercial	4.13333
			Yellow jack	Caranx bartholomaei Cuvier, 1833	4.5	Fisheries: commercial; gamefish: yes
			Blue runner	Caranx crysos (Mitchill, 1815)	4.1	Fisheries: minor commercial; gamefish: yes
			Crevalle jack	Caranx hippos (Linnaeus, 1766)	3.6	Fisheries: commercial; gamefish: yes
			Horse-eye jack	Caranx latus Agassiz, 1831	4.2	Fisheries: minor commercial; gamefish: yes; aquarium: commercial
			Longfin yellowtail	Seriola rivoliana Valenciennes, 1833	4.5	Fisheries: commercial; gamefish: yes
			Black jack	Caranx lugubris Poey, 1860	4.5	Fisheries: minor commercial; aquaculture: commercial; gamefish: yes
			Whitetongue jack	Uraspis helvola (Forster, 1801)	3.8	Fisheries: minor commercial; gamefish: yes
			Cottonmouth jack	Uraspis secunda (Poey, 1860)	4	Fisheries: minor commercial; gamefish: yes
C127	Jacks, crevalles nei	Atlantic, Western Central	African pompano	Alectis ciliaris (Bloch, 1787)	4	Fisheries: minor commercial; gamefish: yes; aquarium: commercial	4.18889
			Yellow jack	Caranx bartholomaei Cuvier, 1833	4.5	Fisheries: commercial; gamefish: yes
			Blue runner	Caranx crysos (Mitchill, 1815)	4.1	Fisheries: minor commercial; gamefish: yes
			Crevalle jack	Caranx hippos (Linnaeus, 1766)	3.6	Fisheries: commercial; gamefish: yes
			Horse-eye jack	Caranx latus Agassiz, 1831	4.2	Fisheries: minor commercial; gamefish: yes; aquarium: commercial
			Longfin yellowtail	Seriola rivoliana Valenciennes, 1833	4.5	Fisheries: commercial; gamefish: yes
			Black jack	Caranx lugubris Poey, 1860	4.5	Fisheries: minor commercial; aquaculture: commercial; gamefish: yes
			Bar jack	Caranx ruber (Bloch, 1793)	4.3	Fisheries: commercial; gamefish: yes
			Cottonmouth jack	Uraspis secunda (Poey, 1860)	4	Fisheries: minor commercial; gamefish: yes
C128	Jacks, crevalles nei	Atlantic, Southwest	African pompano	Alectis ciliaris (Bloch, 1787)	4	Fisheries: minor commercial; gamefish: yes; aquarium: commercial	4.15
			Blue runner	Caranx crysos (Mitchill, 1815)	4.1	Fisheries: minor commercial; gamefish: yes
			Crevalle jack	Caranx hippos (Linnaeus, 1766)	3.6	Fisheries: commercial; gamefish: yes
			Horse-eye jack	Caranx latus Agassiz, 1831	4.2	Fisheries: minor commercial; gamefish: yes; aquarium: commercial
			Longfin yellowtail	Seriola rivoliana Valenciennes, 1833	4.5	Fisheries: commercial; gamefish: yes
			Black jack	Caranx lugubris Poey, 1860	4.5	Fisheries: minor commercial; aquaculture: commercial; gamefish: yes
			Bar jack	Caranx ruber (Bloch, 1793)	4.3	Fisheries: commercial; gamefish: yes
			Cottonmouth jack	Uraspis secunda (Poey, 1860)	4	Fisheries: minor commercial; gamefish: yes
C129	Jacks, crevalles nei	Pacific, Northwest, Western Central	African pompano	Alectis ciliaris (Bloch, 1787)	4	Fisheries: minor commercial; gamefish: yes; aquarium: commercial	4.16
			Longfin yellowtail	Seriola rivoliana Valenciennes, 1833	4.5	Fisheries: commercial; gamefish: yes
			Black jack	Caranx lugubris Poey, 1860	4.5	Fisheries: minor commercial; aquaculture: commercial; gamefish: yes
			Whitetongue jack	Uraspis helvola (Forster, 1801)	3.8	Fisheries: minor commercial; gamefish: yes
			Cottonmouth jack	Uraspis secunda (Poey, 1860)	4	Fisheries: minor commercial; gamefish: yes
C130	Jacks, crevalles nei	Pacific, Southeast	African pompano	Alectis ciliaris (Bloch, 1787)	4	Fisheries: minor commercial; gamefish: yes; aquarium: commercial	4.08
			Longfin yellowtail	Seriola rivoliana Valenciennes, 1833	4.5	Fisheries: commercial; gamefish: yes
			Green jack	Caranx caballus Günther, 1868	4.1	Fisheries: commercial
			Whitetongue jack	Uraspis helvola (Forster, 1801)	3.8	Fisheries: minor commercial; gamefish: yes
			Cottonmouth jack	Uraspis secunda (Poey, 1860)	4	Fisheries: minor commercial; gamefish: yes
C131	Jacks, crevalles nei	Pacific, Eastern Central	African pompano	Alectis ciliaris (Bloch, 1787)	4	Fisheries: minor commercial; gamefish: yes; aquarium: commercial	4.15
			Longfin yellowtail	Seriola rivoliana Valenciennes, 1833	4.5	Fisheries: commercial; gamefish: yes
			Green jack	Caranx caballus Günther, 1868	4.1	Fisheries: commercial
			Black jack	Caranx lugubris Poey, 1860	4.5	Fisheries: minor commercial; aquaculture: commercial; gamefish: yes
			Whitetongue jack	Uraspis helvola (Forster, 1801)	3.8	Fisheries: minor commercial; gamefish: yes
			Cottonmouth jack	Uraspis secunda (Poey, 1860)	4	Fisheries: minor commercial; gamefish: yes
C132	Jacks, crevalles nei	Indian Ocean	African pompano	Alectis ciliaris (Bloch, 1787)	4	Fisheries: minor commercial; gamefish: yes; aquarium: commercial	4.16
			Longfin yellowtail	Seriola rivoliana Valenciennes, 1833	4.5	Fisheries: commercial; gamefish: yes
			Black jack	Caranx lugubris Poey, 1860	4.5	Fisheries: minor commercial; aquaculture: commercial; gamefish: yes
			Whitetongue jack	Uraspis helvola (Forster, 1801)	3.8	Fisheries: minor commercial; gamefish: yes
			Cottonmouth jack	Uraspis secunda (Poey, 1860)	4	Fisheries: minor commercial; gamefish: yes
C133	Jacks, crevalles nei	Mediterranean and Black Sea	African pompano	Alectis ciliaris (Bloch, 1787)	4	Fisheries: minor commercial; gamefish: yes; aquarium: commercial	4.05
			Blue runner	Caranx crysos (Mitchill, 1815)	4.1	Fisheries: minor commercial; gamefish: yes
C134	Jacks, crevalles nei	Atlantic, Southeast	African pompano	Alectis ciliaris (Bloch, 1787)	4	Fisheries: minor commercial; gamefish: yes; aquarium: commercial	4.0875
			Blue runner	Caranx crysos (Mitchill, 1815)	4.1	Fisheries: minor commercial; gamefish: yes
			Crevalle jack	Caranx hippos (Linnaeus, 1766)	3.6	Fisheries: commercial; gamefish: yes
			Horse-eye jack	Caranx latus Agassiz, 1831	4.2	Fisheries: minor commercial; gamefish: yes; aquarium: commercial
			Longfin yellowtail	Seriola rivoliana Valenciennes, 1833	4.5	Fisheries: commercial; gamefish: yes
			Black jack	Caranx lugubris Poey, 1860	4.5	Fisheries: minor commercial; aquaculture: commercial; gamefish: yes
			Whitetongue jack	Uraspis helvola (Forster, 1801)	3.8	Fisheries: minor commercial; gamefish: yes
			Cottonmouth jack	Uraspis secunda (Poey, 1860)	4	Fisheries: minor commercial; gamefish: yes
C135	Kingcroakers nei	Pacific, Southeast	Pacific kingcroaker	Menticirrhus elongatus (Günther, 1864)	3.4	Fisheries: commercial	3.35
			California kingcroaker	Menticirrhus undulatus (Girard, 1854)	3.3	Fisheries: commercial; gamefish: yes
C136	Lefteye flounders nei	Atlantic, Northeast, Eastern Central	Wide-eyed flounder	Bothus podas (Delaroche, 1809)	3.4	Fisheries: commercial; aquarium: commercial	3.45
			Pelican flounder	Chascanopsetta lugubris Alcock, 1894	3.5	Fisheries: commercial
C137	Lefteye flounders nei	Atlantic, Southwest, Western Central	Plate fish	Bothus lunatus (Linnaeus, 1758)	4.5	Fisheries: minor commercial; aquarium: commercial	3.77143
			Mottled flounder	Bothus maculiferus (Poey, 1860)	3.7	Fisheries: minor commercial
			Eyed flounder	Bothus ocellatus (Agassiz, 1831)	3.8	Fisheries: minor commercial; aquarium: commercial
			Twospot flounder	Bothus robinsi Topp & Hoff, 1972	3.7	Fisheries: minor commercial
			Pelican flounder	Chascanopsetta lugubris Alcock, 1894	3.5	Fisheries: commercial
			Deepwater flounder	Monolene sessilicauda Goode, 1880	3.6	Fisheries: minor commercial
			Caribbean flounder	Trichopsetta caribbaea Anderson & Gutherz, 1967	3.6	Fisheries: minor commercial
C138	Lefteye flounders nei	Pacific, Western Central	Largetooth flounder	Pseudorhombus arsius (Hamilton, 1822)	4.2	Fisheries: commercial; gamefish: yes	3.69545
			Cinnamon flounder	Pseudorhombus cinnamoneus (Temminck & Schlegel, 1846)	4	Fisheries: commercial
			Deep flounder	Pseudorhombus elevatus Ogilby, 1912	3.5	Fisheries: commercial
			Javan flounder	Pseudorhombus javanicus (Bleeker, 1853)	3.5	Fisheries: commercial
			Malayan flounder	Pseudorhombus malayanus Bleeker, 1865	3.5	Fisheries: commercial
			Five-eyed flounder	Pseudorhombus quinquocellatus Weber & de Beaufort, 1929	3.5	Fisheries: commercial
			Three spotted flounders	Pseudorhombus triocellatus (Bloch & Schneider, 1801)	3.5	Fisheries: commercial; aquarium: public aquariums
			Cinnamon flounder	Pseudorhombus cinnamoneus (Temminck & Schlegel, 1846)	4	Fisheries: commercial
			Four twin-spot flounder	Pseudorhombus diplospilus Norman, 1926	3.5	Fisheries: commercial
			Ocellated flounder	Pseudorhombus dupliciocellatus Regan, 1905	4.2	Fisheries: commercial
			Deep flounder	Pseudorhombus elevatus Ogilby, 1912	3.5	Fisheries: commercial
			Javan flounder	Pseudorhombus javanicus (Bleeker, 1853)	3.5	Fisheries: commercial
			Smalltooth flounder	Pseudorhombus jenynsii (Bleeker, 1855)	3.5	Fisheries: commercial
			Spiny flounder	Pseudorhombus spinosus McCulloch, 1914	3.5	Fisheries: commercial
			Bastard halibut	Paralichthys olivaceus (Temminck & Schlegel, 1846)	4.5	Fisheries: highly commercial; aquaculture: commercial
			Flowery flounder	Bothus mancus (Broussonet, 1782)	4.4	Fisheries: commercial; aquarium: commercial
			Indo-Pacific oval flounder	Bothus myriaster (Temminck & Schlegel, 1846)	3.5	Fisheries: commercial
			Leopard flounder	Bothus pantherinus (Rüppell, 1830)	3.5	Fisheries: commercial
			Largescale flounder	Engyprosopon grandisquama (Temminck & Schlegel, 1846)	3.1	Fisheries: commercial
			Threespot flounder	Grammatobothus polyophthalmus (Bleeker, 1865)	3.6	Fisheries: commercial
			Eyed flounder	Bothus ocellatus (Agassiz, 1831)	3.8	Fisheries: minor commercial; aquarium: commercial
			Pelican flounder	Chascanopsetta lugubris Alcock, 1894	3.5	Fisheries: commercial
C139	Lefteye flounders nei	Atlantic, Northwest	Summer flounder	Paralichthys dentatus (Linnaeus, 1766)	4.5	Fisheries: commercial; gamefish: yes	3.775
			Southern flounder	Paralichthys lethostigma Jordan & Gilbert, 1884	3.5	Fisheries: commercial; gamefish: yes
			Pelican flounder	Chascanopsetta lugubris Alcock, 1894	3.5	Fisheries: commercial
			Deepwater flounder	Monolene sessilicauda Goode, 1880	3.6	Fisheries: minor commercial
C140	Lizardfishes nei	Pacific, Western Central	Bombay-duck	Harpadon nehereus (Hamilton, 1822)	4.1	Fisheries: highly commercial	4.20769
			Slender lizardfish	Saurida elongata (Temminck & Schlegel, 1846)	4.5	Fisheries: minor commercial
			Gracile lizardfish	Saurida gracilis (Quoy & Gaimard, 1824)	4.2	Fisheries: commercial
			Longfin lizardfish	Saurida longimanus Norman, 1939	4.1	Fisheries: commercial
			Shortfin lizardfish	Saurida micropectoralis Shindo & Yamada, 1972	4.3	Fisheries: commercial
			Greater lizardfish	Saurida tumbil (Bloch, 1795)	4.4	Fisheries: commercial
			Brushtooth lizardfish	Saurida undosquamis (Richardson, 1848)	4.5	Fisheries: minor commercial
			Wanieso lizardfish	Saurida wanieso Shindo & Yamada, 1972	4	Fisheries: minor commercial
			Blackear lizardfish	Synodus hoshinonis Tanaka, 1917	4.2	Fisheries: minor commercial
			Indian lizardfish	Synodus indicus (Day, 1873)	4.2	Fisheries: commercial
			Lighthouse lizardfish	Synodus jaculum Russell & Cressey, 1979	4	Fisheries: minor commercial
			Triplecross lizardfish	Synodus macrops Tanaka, 1917	4	Fisheries: minor commercial
			Variegated lizardfish	Synodus variegatus (Lacepède, 1803)	4.2	Fisheries: commercial
C141	Lizardfishes nei	Pacific, Northwest	Gracile lizardfish	Saurida gracilis (Quoy & Gaimard, 1824)	4.2	Fisheries: commercial	4.15
			Longfin lizardfish	Saurida longimanus Norman, 1939	4.1	Fisheries: commercial
			Shortfin lizardfish	Saurida micropectoralis Shindo & Yamada, 1972	4.3	Fisheries: commercial
			Blackear lizardfish	Synodus hoshinonis Tanaka, 1917	4.2	Fisheries: minor commercial
			Indian lizardfish	Synodus indicus (Day, 1873)	4.2	Fisheries: commercial
			Lighthouse lizardfish	Synodus jaculum Russell & Cressey, 1979	4	Fisheries: minor commercial
			Triplecross lizardfish	Synodus macrops Tanaka, 1917	4	Fisheries: minor commercial
			Variegated lizardfish	Synodus variegatus (Lacepède, 1803)	4.2	Fisheries: commercial
C142	Lizardfishes nei	Indian Ocean, Western	Bombay-duck	Harpadon nehereus (Hamilton, 1822)	4.1	Fisheries: highly commercial	4.1
			Gracile lizardfish	Saurida gracilis (Quoy & Gaimard, 1824)	4.2	Fisheries: commercial
			Longfin lizardfish	Saurida longimanus Norman, 1939	4.1	Fisheries: commercial
			Wanieso lizardfish	Saurida wanieso Shindo & Yamada, 1972	4	Fisheries: minor commercial
			Wanieso lizardfish	Saurida wanieso Shindo & Yamada, 1972	4	Fisheries: minor commercial
			Blackear lizardfish	Synodus hoshinonis Tanaka, 1917	4.2	Fisheries: minor commercial
			Indian lizardfish	Synodus indicus (Day, 1873)	4.2	Fisheries: commercial
			Lighthouse lizardfish	Synodus jaculum Russell & Cressey, 1979	4	Fisheries: minor commercial
			Triplecross lizardfish	Synodus macrops Tanaka, 1917	4	Fisheries: minor commercial
			Variegated lizardfish	Synodus variegatus (Lacepède, 1803)	4.2	Fisheries: commercial
C143	Lizardfishes nei	Indian Ocean, Eastern	Bombay-duck	Harpadon nehereus (Hamilton, 1822)	4.1	Fisheries: highly commercial	4.18333
			Gracile lizardfish	Saurida gracilis (Quoy & Gaimard, 1824)	4.2	Fisheries: commercial
			Longfin lizardfish	Saurida longimanus Norman, 1939	4.1	Fisheries: commercial
			Shortfin lizardfish	Saurida micropectoralis Shindo & Yamada, 1972	4.3	Fisheries: commercial
			Greater lizardfish	Saurida tumbil (Bloch, 1795)	4.4	Fisheries: commercial
			Brushtooth lizardfish	Saurida undosquamis (Richardson, 1848)	4.5	Fisheries: minor commercial
			Wanieso lizardfish	Saurida wanieso Shindo & Yamada, 1972	4	Fisheries: minor commercial
			Blackear lizardfish	Synodus hoshinonis Tanaka, 1917	4.2	Fisheries: minor commercial
			Indian lizardfish	Synodus indicus (Day, 1873)	4.2	Fisheries: commercial
			Lighthouse lizardfish	Synodus jaculum Russell & Cressey, 1979	4	Fisheries: minor commercial
			Triplecross lizardfish	Synodus macrops Tanaka, 1917	4	Fisheries: minor commercial
			Variegated lizardfish	Synodus variegatus (Lacepède, 1803)	4.2	Fisheries: commercial
C144	Mackerels nei	Mediterranean and Black Sea	Atlantic mackerel	Scomber scombrus Linnaeus, 1758	3.6	Fisheries: highly commercial; gamefish: yes	3.75
			Atlantic chub mackerel	Scomber colias Gmelin, 1789	3.9	Fisheries: minor commercial
C145	Mackerels nei	Indian Ocean, Eastern	Short mackerel	Rastrelliger brachysoma (Bleeker, 1851)	2.7	Fisheries: highly commercial; gamefish: yes	3.71667
			Island mackerel	Rastrelliger faughni Matsui, 1967	3.4	Fisheries: commercial; gamefish: yes
			Indian mackerel	Rastrelliger kanagurta (Cuvier, 1816)	3.2	Fisheries: highly commercial; gamefish: yes; bait: occasionally
			Blue mackerel	Scomber australasicus Cuvier, 1832	4.2	Fisheries: commercial; gamefish: yes; bait: usually
			Narrow-barred Spanish mackerel	Scomberomorus commerson (Lacepède, 1800)	4.5	Fisheries: highly commercial; gamefish: yes
			Indo-Pacific king mackerel	Scomberomorus guttatus (Bloch & Schneider, 1801)	4.3	Fisheries: highly commercial; gamefish: yes
C146	Mackerels nei	Pacific, Southwest	Shark mackerel	Grammatorcynus bicarinatus (Quoy & Gaimard, 1825)	4.5	Fisheries: commercial; gamefish: yes	3.775
			Short mackerel	Rastrelliger brachysoma (Bleeker, 1851)	2.7	Fisheries: highly commercial; gamefish: yes
			Island mackerel	Rastrelliger faughni Matsui, 1967	3.4	Fisheries: commercial; gamefish: yes
			Indian mackerel	Rastrelliger kanagurta (Cuvier, 1816)	3.2	Fisheries: highly commercial; gamefish: yes; bait: occasionally
			Blue mackerel	Scomber australasicus Cuvier, 1832	4.2	Fisheries: commercial; gamefish: yes; bait: usually
			Chub mackerel	Scomber japonicus Houttuyn, 1782	3.4	Fisheries: highly commercial; aquaculture: commercial; gamefish: yes; bait: usually
			Narrow-barred Spanish mackerel	Scomberomorus commerson (Lacepède, 1800)	4.5	Fisheries: highly commercial; gamefish: yes
			Indo-Pacific king mackerel	Scomberomorus guttatus (Bloch & Schneider, 1801)	4.3	Fisheries: highly commercial; gamefish: yes
C147	Mackerels nei	Pacific, Western Central	Shark mackerel	Grammatorcynus bicarinatus (Quoy & Gaimard, 1825)	4.5	Fisheries: commercial; gamefish: yes	3.85556
			Short mackerel	Rastrelliger brachysoma (Bleeker, 1851)	2.7	Fisheries: highly commercial; gamefish: yes
			Island mackerel	Rastrelliger faughni Matsui, 1967	3.4	Fisheries: commercial; gamefish: yes
			Indian mackerel	Rastrelliger kanagurta (Cuvier, 1816)	3.2	Fisheries: highly commercial; gamefish: yes; bait: occasionally
			Blue mackerel	Scomber australasicus Cuvier, 1832	4.2	Fisheries: commercial; gamefish: yes; bait: usually
			Chub mackerel	Scomber japonicus Houttuyn, 1782	3.4	Fisheries: highly commercial; aquaculture: commercial; gamefish: yes; bait: usually
			Narrow-barred Spanish mackerel	Scomberomorus commerson (Lacepède, 1800)	4.5	Fisheries: highly commercial; gamefish: yes
			Indo-Pacific king mackerel	Scomberomorus guttatus (Bloch & Schneider, 1801)	4.3	Fisheries: highly commercial; gamefish: yes
			Japanese Spanish mackerel	Scomberomorus niphonius (Cuvier, 1832)	4.5	Fisheries: highly commercial; aquaculture: commercial; gamefish: yes
C148	Mackerels nei	Atlantic, Southwest	Atlantic chub mackerel	Scomber colias Gmelin, 1789	3.9	Fisheries: minor commercial	3.86667
			Serra Spanish mackerel	Scomberomorus brasiliensis Collette, Russo & Zavala-Camin, 1978	3.3	Fisheries: commercial; gamefish: yes
			King mackerel	Scomberomorus cavalla (Cuvier, 1829)	4.4	Fisheries: commercial; gamefish: yes
C149	Mackerels nei	Atlantic, Eastern Central	Atlantic mackerel	Scomber scombrus Linnaeus, 1758	3.6	Fisheries: highly commercial; gamefish: yes	3.96667
			West African Spanish mackerel	Scomberomorus tritor (Cuvier, 1832)	4.4	Fisheries: commercial
			Atlantic chub mackerel	Scomber colias Gmelin, 1789	3.9	Fisheries: minor commercial
C150	Mackerels nei	Atlantic, Southeast	West African Spanish mackerel	Scomberomorus tritor (Cuvier, 1832)	4.4	Fisheries: commercial	4.15
			Atlantic chub mackerel	Scomber colias Gmelin, 1789	3.9	Fisheries: minor commercial
C151	Mackerels nei	Atlantic, Northeast	Atlantic mackerel	Scomber scombrus Linnaeus, 1758	3.6	Fisheries: highly commercial; gamefish: yes	3.75
			Atlantic chub mackerel	Scomber colias Gmelin, 1789	3.9	Fisheries: minor commercial
C152	Mackerels nei	Atlantic, Western Central	Atlantic mackerel	Scomber scombrus Linnaeus, 1758	3.6	Fisheries: highly commercial; gamefish: yes	3.8
			Atlantic chub mackerel	Scomber colias Gmelin, 1789	3.9	Fisheries: minor commercial
			Serra Spanish mackerel	Scomberomorus brasiliensis Collette, Russo & Zavala-Camin, 1978	3.3	Fisheries: commercial; gamefish: yes
			King mackerel	Scomberomorus cavalla (Cuvier, 1829)	4.4	Fisheries: commercial; gamefish: yes
C153	Mackerels nei	Indian Ocean, Western	Indian mackerel	Rastrelliger kanagurta (Cuvier, 1816)	3.2	Fisheries: highly commercial; gamefish: yes; bait: occasionally	3.96667
			Blue mackerel	Scomber australasicus Cuvier, 1832	4.2	Fisheries: commercial; gamefish: yes; bait: usually
			Narrow-barred Spanish mackerel	Scomberomorus commerson (Lacepède, 1800)	4.5	Fisheries: highly commercial; gamefish: yes
C154	Marlins,sailfishes,etc. nei	Pacific	Black marlin	Istiompax indica (Cuvier, 1832)	4.5	Fisheries: commercial; gamefish: yes	4.5
			Striped marlin	Kajikia audax (Philippi, 1887)	4.5	Fisheries: commercial; gamefish: yes
			Indo-Pacific blue marlin	Makaira mazara (Jordan & Snyder, 1901)	4.5	Fisheries: commercial; gamefish: yes
			Blue marlin	Makaira nigricans Lacepède, 1802	4.5	Fisheries: commercial; gamefish: yes
			Shortbill spearfish	Tetrapturus angustirostris Tanaka, 1915	4.5	Fisheries: minor commercial; gamefish: yes
C155	Marlins,sailfishes,etc. nei	Atlantic	Atlantic sailfish	Istiophorus albicans (Latreille, 1804)	4.5	Fisheries: commercial; gamefish: yes	4.5
			Atlantic white marlin	Kajikia albida (Poey, 1860)	4.5	Fisheries: minor commercial; gamefish: yes
			Blue marlin	Makaira nigricans Lacepède, 1802	4.5	Fisheries: commercial; gamefish: yes
C156	Mobula nei	Pacific, Southeast	Smoothtail mobula	Mobula thurstoni (Lloyd, 1908)	3.1	Fisheries: minor commercial	3.43333
			Munk's devil ray	Mobula munkiana Notarbartolo-di-Sciara, 1987	3.8	Fisheries: commercial
			Spinetail mobula	Mobula japanica (Müller & Henle, 1841)	3.4	Fisheries: commercial
C157	Mojarras(=Silver-biddies) nei	Indo-Pacific, Western Central	Common silver-biddy	Gerres oyena (Forsskål, 1775)	2.7	Fisheries: commercial	3.05
			Longfin mojarra	Pentaprion longimanus (Cantor, 1849)	3.4	Fisheries: minor commercial
C158	Mojarras, etc. nei	Atlantic, Western Central	Irish mojarra	Diapterus auratus Ranzani, 1842	2.4	Fisheries: minor commercial	3.04
			Caitipa mojarra	Diapterus rhombeus (Cuvier, 1829)	3	Fisheries: minor commercial
			Silver mojarra	Eucinostomus argenteus Baird & Girard, 1855	3.2	Fisheries: minor commercial
			Graceful mojarra	Eucinostomus gracilis (Gill, 1862)	3.1	Fisheries: minor commercial
			Jenny mojarra	Eucinostomus gula (Quoy & Gaimard, 1824)	2.7	Fisheries: minor commercial
			Bigeye mojarra	Eucinostomus havana (Nichols, 1912)	3.5	Fisheries: minor commercial
			Flagfin mojarra	Eucinostomus melanopterus (Bleeker, 1863)	3.4	Fisheries: minor commercial
			Brazilian mojarra	Eugerres brasilianus (Cuvier, 1830)	3.4	Fisheries: commercial
			Striped mojarra	Eugerres plumieri (Cuvier, 1830)	2.2	Fisheries: minor commercial
			Yellow fin mojarra	Gerres cinereus (Walbaum, 1792)	3.5	Fisheries: minor commercial
C159	Mojarras, etc. nei	Pacific, Southeast, Eastern	Peruvian mojarra	Diapterus peruvianus (Cuvier, 1830)	3.7	Fisheries: commercial	3.32
			Silver mojarra	Eucinostomus argenteus Baird & Girard, 1855	3.2	Fisheries: minor commercial
			Pacific flagfin mojarra	Eucinostomus currani Zahuranec, 1980	3.3	Fisheries: minor commercial
			Dark-spot mojarra	Eucinostomus entomelas Zahuranec, 1980	3.3	Fisheries: minor commercial
			Graceful mojarra	Eucinostomus gracilis (Gill, 1862)	3.1	Fisheries: minor commercial
C160	Mullets nei	Mediterranean and Black Sea	Flathead grey mullet	Mugil cephalus Linnaeus, 1758	2.5	Fisheries: highly commercial; aquaculture: commercial; gamefish: yes; bait: occasionally	2.8
			Red mullet	Mullus barbatus Linnaeus, 1758	3.1	Fisheries: commercial; gamefish: yes
C161	Mullets nei	Atlantic, Southeast	Grooved mullet	Chelon dumerili (Steindachner, 1870)	2.7	Fisheries: commercial	2.53333
			South African mullet	Chelon richardsonii (Smith, 1846)	2.4	Fisheries: commercial; aquarium: public aquariums
			Flathead grey mullet	Mugil cephalus Linnaeus, 1758	2.5	Fisheries: highly commercial; aquaculture: commercial; gamefish: yes; bait: occasionally
C162	Mullets nei	Atlantic, Southwest	Flathead grey mullet	Mugil cephalus Linnaeus, 1758	2.5	Fisheries: highly commercial; aquaculture: commercial; gamefish: yes; bait: occasionally	2.16667
			White mullet	Mugil curema Valenciennes, 1836	2	Fisheries: commercial; aquaculture: commercial; bait: occasionally
			Lebranche mullet	Mugil liza Valenciennes, 1836	2	Fisheries: commercial; aquaculture: commercial
C163	Mullets nei	Indian Ocean, Eastern	Bluetail mullet	Crenimugil buchanani (Bleeker, 1853)	2.2	Fisheries: commercial	2.33636
			Fringelip mullet	Crenimugil crenilabis (Forsskål, 1775)	2.3	Fisheries: minor commercial; aquaculture: commercial; bait: occasionally
			Bluespot mullet	Crenimugil seheli (Forsskål, 1775)	2.3	Fisheries: commercial
			Squaretail mullet	Ellochelon vaigiensis (Quoy & Gaimard, 1825)	2.2	Fisheries: commercial; aquaculture: commercial; aquarium: commercial; bait: occasionally
			Flathead grey mullet	Mugil cephalus Linnaeus, 1758	2.5	Fisheries: highly commercial; aquaculture: commercial; gamefish: yes; bait: occasionally
			Longarm mullet	Osteomugil cunnesius (Valenciennes, 1836)	2.4	Fisheries: commercial; bait: usually
			Speigler's mullet	Osteomugil speigleri (Bleeker, 1858)	2.2	Fisheries: commercial
			Largescale mullet	Planiliza macrolepis (Smith, 1846)	2.6	Fisheries: commercial; aquaculture: commercial; gamefish: yes
			Otomebora mullet	Planiliza melinoptera (Valenciennes, 1836)	2.3	Fisheries: commercial
			Tade gray mullet	Planiliza planiceps (Valenciennes, 1836)	2	Fisheries: commercial; aquaculture: commercial
			Greenback mullet	Planiliza subviridis (Valenciennes, 1836)	2.7	Fisheries: commercial; aquaculture: commercial; bait: usually
C164	Mullets nei	Pacific, Southwest	Yellow-eye mullet	Aldrichetta forsteri (Valenciennes, 1836)	2.5	Fisheries: commercial; gamefish: yes	2.4
			Flathead grey mullet	Mugil cephalus Linnaeus, 1758	2.5	Fisheries: highly commercial; aquaculture: commercial; gamefish: yes; bait: occasionally
			Longarm mullet	Osteomugil cunnesius (Valenciennes, 1836)	2.4	Fisheries: commercial; bait: usually
			Speigler's mullet	Osteomugil speigleri (Bleeker, 1858)	2.2	Fisheries: commercial
			Largescale mullet	Planiliza macrolepis (Smith, 1846)	2.6	Fisheries: commercial; aquaculture: commercial; gamefish: yes
			Otomebora mullet	Planiliza melinoptera (Valenciennes, 1836)	2.3	Fisheries: commercial
			Tade gray mullet	Planiliza planiceps (Valenciennes, 1836)	2	Fisheries: commercial; aquaculture: commercial
			Greenback mullet	Planiliza subviridis (Valenciennes, 1836)	2.7	Fisheries: commercial; aquaculture: commercial; bait: usually
C165	Mullets nei	Pacific, Western Central	Bluetail mullet	Crenimugil buchanani (Bleeker, 1853)	2.2	Fisheries: commercial	2.38333
			Fringelip mullet	Crenimugil crenilabis (Forsskål, 1775)	2.3	Fisheries: minor commercial; aquaculture: commercial; bait: occasionally
			Bluespot mullet	Crenimugil seheli (Forsskål, 1775)	2.3	Fisheries: commercial
			Squaretail mullet	Ellochelon vaigiensis (Quoy & Gaimard, 1825)	2.2	Fisheries: commercial; aquaculture: commercial; aquarium: commercial; bait: occasionally
			Flat-tail mullet	Gracilimugil argenteus (Quoy & Gaimard, 1825)	2.9	Fisheries: commercial
			Flathead grey mullet	Mugil cephalus Linnaeus, 1758	2.5	Fisheries: highly commercial; aquaculture: commercial; gamefish: yes; bait: occasionally
			Longarm mullet	Osteomugil cunnesius (Valenciennes, 1836)	2.4	Fisheries: commercial; bait: usually
			Speigler's mullet	Osteomugil speigleri (Bleeker, 1858)	2.2	Fisheries: commercial
			Largescale mullet	Planiliza macrolepis (Smith, 1846)	2.6	Fisheries: commercial; aquaculture: commercial; gamefish: yes
			Otomebora mullet	Planiliza melinoptera (Valenciennes, 1836)	2.3	Fisheries: commercial
			Tade gray mullet	Planiliza planiceps (Valenciennes, 1836)	2	Fisheries: commercial; aquaculture: commercial
			Greenback mullet	Planiliza subviridis (Valenciennes, 1836)	2.7	Fisheries: commercial; aquaculture: commercial; bait: usually
C166	Mullets nei	Indian Ocean, Western	Grooved mullet	Chelon dumerili (Steindachner, 1870)	2.7	Fisheries: commercial	2.36923
			South African mullet	Chelon richardsonii (Smith, 1846)	2.4	Fisheries: commercial; aquarium: public aquariums
			Bluetail mullet	Crenimugil buchanani (Bleeker, 1853)	2.2	Fisheries: commercial
			Fringelip mullet	Crenimugil crenilabis (Forsskål, 1775)	2.3	Fisheries: minor commercial; aquaculture: commercial; bait: occasionally
			Bluespot mullet	Crenimugil seheli (Forsskål, 1775)	2.3	Fisheries: commercial
			Squaretail mullet	Ellochelon vaigiensis (Quoy & Gaimard, 1825)	2.2	Fisheries: commercial; aquaculture: commercial; aquarium: commercial; bait: occasionally
			Flathead grey mullet	Mugil cephalus Linnaeus, 1758	2.5	Fisheries: highly commercial; aquaculture: commercial; gamefish: yes; bait: occasionally
			Longarm mullet	Osteomugil cunnesius (Valenciennes, 1836)	2.4	Fisheries: commercial; bait: usually
			Speigler's mullet	Osteomugil speigleri (Bleeker, 1858)	2.2	Fisheries: commercial
			Largescale mullet	Planiliza macrolepis (Smith, 1846)	2.6	Fisheries: commercial; aquaculture: commercial; gamefish: yes
			Otomebora mullet	Planiliza melinoptera (Valenciennes, 1836)	2.3	Fisheries: commercial
			Tade gray mullet	Planiliza planiceps (Valenciennes, 1836)	2	Fisheries: commercial; aquaculture: commercial
			Greenback mullet	Planiliza subviridis (Valenciennes, 1836)	2.7	Fisheries: commercial; aquaculture: commercial; bait: usually
C167	Mullets nei	Atlantic, Eastern Central	Grooved mullet	Chelon dumerili (Steindachner, 1870)	2.7	Fisheries: commercial	2.8
			Flathead grey mullet	Mugil cephalus Linnaeus, 1758	2.5	Fisheries: highly commercial; aquaculture: commercial; gamefish: yes; bait: occasionally
			Red mullet	Mullus barbatus Linnaeus, 1758	3.1	Fisheries: commercial; gamefish: yes
			Sicklefin mullet	Neochelon falcipinnis (Valenciennes, 1836)	2.9	Fisheries: commercial
C168	Mullets nei	Atlantic, Western Central	Flathead grey mullet	Mugil cephalus Linnaeus, 1758	2.5	Fisheries: highly commercial; aquaculture: commercial; gamefish: yes; bait: occasionally	2.125
			White mullet	Mugil curema Valenciennes, 1836	2	Fisheries: commercial; aquaculture: commercial; bait: occasionally
			Parassi mullet	Mugil incilis Hancock, 1830	2	Fisheries: minor commercial
			Lebranche mullet	Mugil liza Valenciennes, 1836	2	Fisheries: commercial; aquaculture: commercial
C169	Mullets nei	Pacific, Eastern Central	Snouted mullet	Chaenomugil proboscideus (Günther, 1861)	2	Fisheries: minor commercial	2.4
			Flathead grey mullet	Mugil cephalus Linnaeus, 1758	2.5	Fisheries: highly commercial; aquaculture: commercial; gamefish: yes; bait: occasionally
			Greenback mullet	Planiliza subviridis (Valenciennes, 1836)	2.7	Fisheries: commercial; aquaculture: commercial; bait: usually
C170	Mullets nei	Atlantic, Northwest	Flathead grey mullet	Mugil cephalus Linnaeus, 1758	2.5	Fisheries: highly commercial; aquaculture: commercial; gamefish: yes; bait: occasionally	2.25
			White mullet	Mugil curema Valenciennes, 1836	2	Fisheries: commercial; aquaculture: commercial; bait: occasionally
C171	Naked catfishes	Africa - Inland waters	Bayad	Bagrus bajad (Forsskål, 1775)	4	Fisheries: commercial; gamefish: yes	4
			Semutundu	Bagrus docmak (Forsskål, 1775)	4.1	Fisheries: commercial; gamefish: yes
			Kampoyo	Bagrus meridionalis Günther, 1894	3.9	Fisheries: commercial; aquarium: commercial
C172	Needlefishes nei	Pacific, Southeast	Flat needlefish	Ablennes hians (Valenciennes, 1846)	4.5	Fisheries: minor commercial; gamefish: yes	4.425
			Californian needlefish	Strongylura exilis (Girard, 1854)	4.5	Fisheries: minor commercial
			Hound needlefish	Tylosurus crocodilus (Péron & Lesueur, 1821)	4.4	Fisheries: commercial; gamefish: yes
			Keel-jawed needle fish	Tylosurus melanotus (Bleeker, 1850)	4.3	Fisheries: commercial
C173	Needlefishes nei	Indo-Pacific, Western Central	Flat needlefish	Ablennes hians (Valenciennes, 1846)	4.5	Fisheries: minor commercial; gamefish: yes	4.26667
			Banded needlefish	Strongylura leiura (Bleeker, 1850)	3.9	Fisheries: commercial; gamefish: yes
			Hound needlefish	Tylosurus crocodilus (Péron & Lesueur, 1821)	4.4	Fisheries: commercial; gamefish: yes
C174	Needlefishes nei	Atlantic	Flat needlefish	Ablennes hians (Valenciennes, 1846)	4.5	Fisheries: minor commercial; gamefish: yes	4.46667
			Agujon needlefish	Tylosurus acus (Lacepède, 1803)	4.5	Fisheries: commercial; gamefish: yes
			Hound needlefish	Tylosurus crocodilus (Péron & Lesueur, 1821)	4.4	Fisheries: commercial; gamefish: yes
C175	Oreo dories nei	Indian Ocean, Western, Atlantic, Southeast	Warty dory	Allocyttus verrucosus (Gilchrist, 1906)	4.2	Fisheries: minor commercial	3.8
			Spiky oreo	Neocyttus rhomboidalis Gilchrist, 1906	3.6	Fisheries: minor commercial
			Smooth oreo dory	Pseudocyttus maculatus Gilchrist, 1906	3.6	Fisheries: commercial
C176	Oreo dories nei	Pacific, Southwest	Black oreo	Allocyttus niger James, Inada & Nakamura, 1988	3.5	Fisheries: commercial	3.725
			Warty dory	Allocyttus verrucosus (Gilchrist, 1906)	4.2	Fisheries: minor commercial
			Spiky oreo	Neocyttus rhomboidalis Gilchrist, 1906	3.6	Fisheries: minor commercial
			Smooth oreo dory	Pseudocyttus maculatus Gilchrist, 1906	3.6	Fisheries: commercial
C177	Parrotfishes nei	Pacific, Eastern Central	Festive parrotfish	Scarus festivus Valenciennes, 1840	2	Fisheries: minor commercial	2
			Bridled parrotfish	Scarus frenatus Lacepède, 1802	2	Fisheries: commercial; aquarium: commercial
			Blue-barred parrotfish	Scarus ghobban Forsskål, 1775	2	Fisheries: commercial; aquarium: commercial
			Dusky parrotfish	Scarus niger Forsskål, 1775	2	Fisheries: commercial; aquarium: commercial
			Ember parrotfish	Scarus rubroviolaceus Bleeker, 1847	2	Fisheries: commercial; aquarium: commercial
C178	Parrotfishes nei	Atlantic, Western Central	Island hogfish	Bodianus insularis Gomon & Lubbock, 1980	3.5	Fisheries: minor commercial	2.5
			Midnight parrotfish	Scarus coelestinus Valenciennes, 1840	2	Fisheries: minor commercial; aquarium: commercial
			Stoplight parrotfish	Sparisoma viride (Bonnaterre, 1788)	2	Fisheries: minor commercial; aquarium: commercial
C179	Parrotfishes nei	Indian Ocean, Western	Spinytooth parrotfish	Calotomus spinidens (Quoy & Gaimard, 1824)	2	Fisheries: commercial; aquarium: commercial	2.04
			Bicolour parrotfish	Cetoscarus bicolor (Rüppell, 1829)	2	Fisheries: commercial; aquarium: commercial
			Captain parrotfish	Chlorurus enneacanthus (Lacepède, 1802)	2	Fisheries: commercial
			Daisy parrotfish	Chlorurus sordidus (Forsskål, 1775)	2.6	Fisheries: commercial; aquarium: commercial
			Marbled parrotfish	Leptoscarus vaigiensis (Quoy & Gaimard, 1824)	2	Fisheries: commercial; aquarium: commercial
			Festive parrotfish	Scarus festivus Valenciennes, 1840	2	Fisheries: minor commercial
			Bridled parrotfish	Scarus frenatus Lacepède, 1802	2	Fisheries: commercial; aquarium: commercial
			Blue-barred parrotfish	Scarus ghobban Forsskål, 1775	2	Fisheries: commercial; aquarium: commercial
			Globehead parrotfish	Scarus globiceps Valenciennes, 1840	2	Fisheries: commercial; aquarium: commercial
			Singapore parrotfish	Scarus prasiognathos Valenciennes, 1840	2	Fisheries: commercial; aquarium: commercial
			Common parrotfish	Scarus psittacus Forsskål, 1775	2	Fisheries: commercial; aquarium: commercial
			Quoy's parrotfish	Scarus quoyi Valenciennes, 1840	2	Fisheries: commercial
			Ember parrotfish	Scarus rubroviolaceus Bleeker, 1847	2	Fisheries: commercial; aquarium: commercial
			Fivesaddle parrotfish	Scarus scaber Valenciennes, 1840	2	Fisheries: commercial
			Tricolour parrotfish	Scarus tricolor Bleeker, 1847	2	Fisheries: commercial; aquarium: commercial
C180	Parrotfishes nei	Atlantic, Southwest	Midnight parrotfish	Scarus coelestinus Valenciennes, 1840	2	Fisheries: minor commercial; aquarium: commercial	2
			Stoplight parrotfish	Sparisoma viride (Bonnaterre, 1788)	2	Fisheries: minor commercial; aquarium: commercial
C181	Parrotfishes nei	Pacific, Western Central, Northwest	Spinytooth parrotfish	Calotomus spinidens (Quoy & Gaimard, 1824)	2	Fisheries: commercial; aquarium: commercial	2.03158
			Palecheek parrotfish	Chlorurus japanensis (Bloch, 1789)	2	Fisheries: commercial; aquarium: commercial
			Daisy parrotfish	Chlorurus sordidus (Forsskål, 1775)	2.6	Fisheries: commercial; aquarium: commercial
			Pacific longnose parrotfish	Hipposcarus longiceps (Valenciennes, 1840)	2	Fisheries: commercial
			Marbled parrotfish	Leptoscarus vaigiensis (Quoy & Gaimard, 1824)	2	Fisheries: commercial; aquarium: commercial
			Yellowbarred parrotfish	Scarus dimidiatus Bleeker, 1859	2	Fisheries: commercial; aquarium: commercial
			Festive parrotfish	Scarus festivus Valenciennes, 1840	2	Fisheries: minor commercial
			Bridled parrotfish	Scarus frenatus Lacepède, 1802	2	Fisheries: commercial; aquarium: commercial
			Blue-barred parrotfish	Scarus ghobban Forsskål, 1775	2	Fisheries: commercial; aquarium: commercial
			Globehead parrotfish	Scarus globiceps Valenciennes, 1840	2	Fisheries: commercial; aquarium: commercial
			Dusky parrotfish	Scarus niger Forsskål, 1775	2	Fisheries: commercial; aquarium: commercial
			Singapore parrotfish	Scarus prasiognathos Valenciennes, 1840	2	Fisheries: commercial; aquarium: commercial
			Common parrotfish	Scarus psittacus Forsskål, 1775	2	Fisheries: commercial; aquarium: commercial
			Quoy's parrotfish	Scarus quoyi Valenciennes, 1840	2	Fisheries: commercial
			Rivulated parrotfish	Scarus rivulatus Valenciennes, 1840	2	Fisheries: commercial
			Ember parrotfish	Scarus rubroviolaceus Bleeker, 1847	2	Fisheries: commercial; aquarium: commercial
			Fivesaddle parrotfish	Scarus scaber Valenciennes, 1840	2	Fisheries: commercial
			Yellowband parrotfish	Scarus schlegeli (Bleeker, 1861)	2	Fisheries: commercial; aquarium: commercial
			Tricolour parrotfish	Scarus tricolor Bleeker, 1847	2	Fisheries: commercial; aquarium: commercial
C182	Pomfrets, ocean breams nei	Pacific, Eastern Central	Atlantic pomfret	Brama brama (Bonnaterre, 1788)	4.1	Fisheries: commercial	4.3
			Pacific pomfret	Brama japonica Hilgendorf, 1878	4.4	Fisheries: commercial
			Pomfret	Taractes rubescens (Jordan & Evermann, 1887)	4.4	Fisheries: commercial
C183	Pompanos nei	Atlantic, Southwest	African pompano	Alectis ciliaris (Bloch, 1787)	4	Fisheries: minor commercial; gamefish: yes; aquarium: commercial	3.875
			Florida pompano	Trachinotus carolinus (Linnaeus, 1766)	3.5	Fisheries: highly commercial; aquaculture: commercial; gamefish: yes; aquarium: public aquariums
			Great pompano	Trachinotus goodei Jordan & Evermann, 1896	4.3	Fisheries: minor commercial; aquaculture: commercial; gamefish: yes
			Plata pompano	Trachinotus marginatus Cuvier, 1832	3.7	Fisheries: minor commercial
C184	Pompanos nei	Atlantic, Western Central	African pompano	Alectis ciliaris (Bloch, 1787)	4	Fisheries: minor commercial; gamefish: yes; aquarium: commercial	3.93333
			Florida pompano	Trachinotus carolinus (Linnaeus, 1766)	3.5	Fisheries: highly commercial; aquaculture: commercial; gamefish: yes; aquarium: public aquariums
			Great pompano	Trachinotus goodei Jordan & Evermann, 1896	4.3	Fisheries: minor commercial; aquaculture: commercial; gamefish: yes
C185	Pompanos nei	Indian Ocean	African pompano	Alectis ciliaris (Bloch, 1787)	4	Fisheries: minor commercial; gamefish: yes; aquarium: commercial	3.675
			Southern pompano	Trachinotus africanus Smith, 1967	3.3	Fisheries: minor commercial; gamefish: yes; aquarium: public aquariums
			Snubnose pompano	Trachinotus blochii (Lacepède, 1801)	3.7	Fisheries: minor commercial; aquaculture: commercial; gamefish: yes; aquarium: public aquariums
			Indian pompano	Trachinotus mookalee Cuvier, 1832	3.7	Fisheries: minor commercial; gamefish: yes
C186	Pompanos nei	Pacific, Eastern Central, Southeast	African pompano	Alectis ciliaris (Bloch, 1787)	4	Fisheries: minor commercial; gamefish: yes; aquarium: commercial	3.9
			Blackblotch pompano	Trachinotus kennedyi Steindachner, 1876	3.8	Fisheries: minor commercial; gamefish: yes
			Paloma pompano	Trachinotus paitensis Cuvier, 1832	3.7	Fisheries: minor commercial
			Gafftopsail pompano	Trachinotus rhodopus Gill, 1863	4	Fisheries: minor commercial; gamefish: yes
			African pompano	Alectis ciliaris (Bloch, 1787)	4	Fisheries: minor commercial; gamefish: yes; aquarium: commercial
C187	Porgies	Atlantic, Western Central	Grass porgy	Calamus arctifrons Goode & Bean, 1882	3.5	Fisheries: commercial; bait: occasionally	3.74
			Saucereye porgy	Calamus calamus (Valenciennes, 1830)	3.5	Fisheries: minor commercial
			Sheepshead porgy	Calamus penna (Valenciennes, 1830)	4.4	Fisheries: minor commercial
			Red porgy	Pagrus pagrus (Linnaeus, 1758)	3.9	Fisheries: commercial; aquaculture: commercial; gamefish: yes; aquarium: public aquariums
			Longspine porgy	Stenotomus caprinus Jordan & Gilbert, 1882	3.4	Fisheries: minor commercial
C188	Porgies, seabreams nei	Mediterranean and Black Sea, Atlantic, Southeast, Northeast, Eastern Central	Sharpsnout seabream	Diplodus puntazzo (Walbaum, 1792)	3.2	Fisheries: commercial; gamefish: yes	3.55
			Red porgy	Pagrus pagrus (Linnaeus, 1758)	3.9	Fisheries: commercial; aquaculture: commercial; gamefish: yes; aquarium: public aquariums
C189	Porgies, seabreams nei	Atlantic, Western Central	Grass porgy	Calamus arctifrons Goode & Bean, 1882	3.5	Fisheries: commercial; bait: occasionally	3.5
			Saucereye porgy	Calamus calamus (Valenciennes, 1830)	3.5	Fisheries: minor commercial
			Sheepshead porgy	Calamus penna (Valenciennes, 1830)	4.4	Fisheries: minor commercial
			Spottail seabream	Diplodus holbrookii (Bean, 1878)	2.3	Fisheries: minor commercial
			Red porgy	Pagrus pagrus (Linnaeus, 1758)	3.9	Fisheries: commercial; aquaculture: commercial; gamefish: yes; aquarium: public aquariums
			Longspine porgy	Stenotomus caprinus Jordan & Gilbert, 1882	3.4	Fisheries: minor commercial
C190	Porgies, seabreams nei	Indian Ocean, Eastern	Grey large-eye bream	Gymnocranius griseus (Temminck & Schlegel, 1843)	3.2	Fisheries: commercial; gamefish: yes	3.375
			Blue-spotted large-eye bream	Gymnocranius microdon (Bleeker, 1851)	3.4	Fisheries: minor commercial
			Silver seabream	Pagrus auratus (Forster, 1801)	3.6	Fisheries: commercial; aquaculture: experimental; gamefish: yes
			Goldlined seabream	Rhabdosargus sarba (Forsskål, 1775)	3.3	Fisheries: commercial; aquaculture: commercial; gamefish: yes
C191	Porgies, seabreams nei	Pacific, Southwest, Western	Yellowsnout large-eye bream	Gymnocranius frenatus Bleeker, 1873	3.4	Fisheries: commercial	3.56667
			Grey large-eye bream	Gymnocranius griseus (Temminck & Schlegel, 1843)	3.2	Fisheries: commercial; gamefish: yes
			Blue-spotted large-eye bream	Gymnocranius microdon (Bleeker, 1851)	3.4	Fisheries: minor commercial
			Silver seabream	Pagrus auratus (Forster, 1801)	3.6	Fisheries: commercial; aquaculture: experimental; gamefish: yes
			Red seabream	Pagrus major (Temminck & Schlegel, 1843)	4.5	Fisheries: highly commercial; aquaculture: commercial; gamefish: yes; aquarium: public aquariums
			Goldlined seabream	Rhabdosargus sarba (Forsskål, 1775)	3.3	Fisheries: commercial; aquaculture: commercial; gamefish: yes
C192	Porgies, seabreams nei	Indian Ocean, Western	Arabian yellowfin seabream	Acanthopagrus arabicus Iwatsuki, 2013	3.2	Fisheries: commercial	3.40909
			Englishman seabream	Chrysoblephus anglicus (Gilchrist & Thompson, 1908)	3.4	Fisheries: commercial
			Daggerhead seabream	Chrysoblephus cristiceps (Valenciennes, 1830)	3.7	Fisheries: commercial; gamefish: yes
			Slinger seabream	Chrysoblephus puniceus (Gilchrist & Thompson, 1908)	3.5	Fisheries: commercial; gamefish: yes
			Karanteen seabream	Crenidens crenidens (Forsskål, 1775)	2.8	Fisheries: commercial; bait: usually
			Red Sea seabream	Diplodus noct (Valenciennes, 1830)	2.7	Fisheries: commercial
			Frenchman seabream	Polysteganus baissaci Smith, 1978	4	Fisheries: commercial
			Blueskin seabream	Polysteganus coeruleopunctatus (Klunzinger, 1870)	4.1	Fisheries: commercial
			Dane seabream	Porcostoma dentata (Gilchrist & Thompson, 1908)	3.3	Fisheries: commercial
			Haffara seabream	Rhabdosargus haffara (Forsskål, 1775)	3.5	Fisheries: commercial
			Goldlined seabream	Rhabdosargus sarba (Forsskål, 1775)	3.3	Fisheries: commercial; aquaculture: commercial; gamefish: yes
C193	Porgies, seabreams nei	Pacific, Northwest	Grey large-eye bream	Gymnocranius griseus (Temminck & Schlegel, 1843)	3.2	Fisheries: commercial; gamefish: yes	3.675
			Blue-spotted large-eye bream	Gymnocranius microdon (Bleeker, 1851)	3.4	Fisheries: minor commercial
			Silver seabream	Pagrus auratus (Forster, 1801)	3.6	Fisheries: commercial; aquaculture: experimental; gamefish: yes
			Red seabream	Pagrus major (Temminck & Schlegel, 1843)	4.5	Fisheries: highly commercial; aquaculture: commercial; gamefish: yes; aquarium: public aquariums
C194	Porgies, seabreams nei	Pacific, Southeast, Eastern Central	Pacific porgy	Calamus brachysomus (Lockington, 1880)	3.8	Fisheries: commercial	3.55
			Galapagos porgy	Calamus taurinus (Jenyns, 1840)	3.3	Fisheries: commercial
C195	Porgies, seabreams nei	Atlantic, Southwest	Saucereye porgy	Calamus calamus (Valenciennes, 1830)	3.5	Fisheries: minor commercial	3.66667
			Sheepshead porgy	Calamus penna (Valenciennes, 1830)	4.4	Fisheries: minor commercial
			South American silver porgy	Diplodus argenteus (Valenciennes, 1830)	3.1	Fisheries: minor commercial; gamefish: yes
C196	Prochilods nei	America, South - Inland waters	Streaked prochilod	Prochilodus lineatus (Valenciennes, 1837)	2.2	Fisheries: commercial; aquaculture: commercial; aquarium: commercial	2.2
			Black prochilodus	Prochilodus nigricans Spix & Agassiz, 1829	2.4	Fisheries: commercial; aquaculture: commercial; aquarium: commercial
			Netted prochilod	Prochilodus reticulatus Valenciennes, 1850	2	Fisheries: commercial; aquaculture: commercial
			Brazilian bocachico	Prochilodus brevis Steindachner, 1875	2.2	Fisheries: commercial; aquaculture: commercial
C197	Puffers nei	Global	Oceanic puffer	Lagocephalus lagocephalus (Linnaeus, 1758)	3.7	Fisheries: commercial; gamefish: yes	3.95
			Blunthead puffer	Sphoeroides pachygaster (Müller & Troschel, 1848)	4.2	Fisheries: commercial
C198	Queenfishes	Indo-Pacific, Western Central	Talang queenfish	Scomberoides commersonnianus Lacepède, 1801	4.4	Fisheries: minor commercial; gamefish: yes	4.25
			Doublespotted queenfish	Scomberoides lysan (Forsskål, 1775)	4	Fisheries: minor commercial; gamefish: yes; bait: occasionally
			Barred queenfish	Scomberoides tala (Cuvier, 1832)	4.5	Fisheries: minor commercial
			Needlescaled queenfish	Scomberoides tol (Cuvier, 1832)	4.1	Fisheries: minor commercial; gamefish: yes
C199	Rays and skates nei	Atlantic, Northeast	Starry ray	Amblyraja radiata (Donovan, 1808)	4.2	Fisheries: minor commercial; gamefish: yes	3.8
			Blue skate	Dipturus batis (Linnaeus, 1758)	3.5	Fisheries: minor commercial; gamefish: yes
			Longnosed skate	Dipturus oxyrinchus (Linnaeus, 1758)	3.5	Fisheries: minor commercial
			Sandy ray	Leucoraja circularis (Couch, 1838)	3.5	Fisheries: minor commercial
			Shagreen ray	Leucoraja fullonica (Linnaeus, 1758)	3.5	Fisheries: minor commercial
			Cuckoo ray	Leucoraja naevus (Müller & Henle, 1841)	4.2	Fisheries: commercial; aquarium: public aquariums
			Blonde ray	Raja brachyura Lafont, 1871	3.8	Fisheries: minor commercial; gamefish: yes
			Thornback ray	Raja clavata Linnaeus, 1758	3.8	Fisheries: commercial; gamefish: yes
			Small-eyed ray	Raja microocellata Montagu, 1818	3.9	Fisheries: minor commercial; gamefish: yes
			Brown ray	Raja miraletus Linnaeus, 1758	3.7	Fisheries: commercial; gamefish: yes
			Spotted ray	Raja montagui Fowler, 1910	3.9	Fisheries: minor commercial
			Undulate ray	Raja undulata Lacepède, 1802	3.5	Fisheries: commercial
			White skate	Rostroraja alba (Lacepède, 1803)	4.4	Fisheries: minor commercial; gamefish: yes
C200	Rays and skates nei	Atlantic, Northwest	Starry ray	Amblyraja radiata (Donovan, 1808)	4.2	Fisheries: minor commercial; gamefish: yes	3.9
			Rosette skate	Leucoraja garmani (Whitley, 1939)	3.6	Fisheries: minor commercial; bait: occasionally
			Clearnose skate	Rostroraja eglanteria (Bosc, 1800)	3.9	Fisheries: minor commercial; bait: occasionally
C201	Rays, stingrays, mantas nei	Mediterranean and Black Sea	Spiny butterfly ray	Gymnura altavela (Linnaeus, 1758)	4.5	Fisheries: minor commercial; gamefish: yes	4.03333
			Giant manta	Mobula birostris (Walbaum, 1792)	3.5	Fisheries: minor commercial
			Common stingray	Dasyatis pastinaca (Linnaeus, 1758)	4.1	Fisheries: commercial; gamefish: yes
C202	Rays, stingrays, mantas nei	Atlantic, Southeast	Spiny butterfly ray	Gymnura altavela (Linnaeus, 1758)	4.5	Fisheries: minor commercial; gamefish: yes	3.72
			Giant manta	Mobula birostris (Walbaum, 1792)	3.5	Fisheries: minor commercial
			Spinetail mobula	Mobula japanica (Müller & Henle, 1841)	3.4	Fisheries: commercial
			Smoothtail mobula	Mobula thurstoni (Lloyd, 1908)	3.1	Fisheries: minor commercial
			Common stingray	Dasyatis pastinaca (Linnaeus, 1758)	4.1	Fisheries: commercial; gamefish: yes
C203	Rays, stingrays, mantas nei	Atlantic, Southwest, Western Central	Spiny butterfly ray	Gymnura altavela (Linnaeus, 1758)	4.5	Fisheries: minor commercial; gamefish: yes	3.4125
			Lesser devil ray	Mobula hypostoma (Bancroft, 1831)	3.8	Fisheries: minor commercial
			Spinetail mobula	Mobula japanica (Müller & Henle, 1841)	3.4	Fisheries: commercial
			Smoothtail mobula	Mobula thurstoni (Lloyd, 1908)	3.1	Fisheries: minor commercial
			Cownose ray	Rhinoptera bonasus (Mitchill, 1815)	3.2	Fisheries: minor commercial; aquarium: public aquariums
			Southern stingray	Hypanus americanus (Hildebrand & Schroeder, 1928)	3.5	Fisheries: commercial; gamefish: yes
			Longnose stingray	Hypanus guttatus (Bloch & Schneider, 1801)	2.6	Fisheries: minor commercial
			Chupare stingray	Styracura schmardae (Werner, 1904)	3.2	Fisheries: minor commercial
C204	Rays, stingrays, mantas nei	Indo-Pacific	Giant manta	Mobula birostris (Walbaum, 1792)	3.5	Fisheries: minor commercial	3.55
			Spinetail mobula	Mobula japanica (Müller & Henle, 1841)	3.4	Fisheries: commercial
			Smoothtail mobula	Mobula thurstoni (Lloyd, 1908)	3.1	Fisheries: minor commercial
			Round ribbontail ray	Taeniurops meyeni (Müller & Henle, 1841)	4.2	Fisheries: commercial; gamefish: yes
C205	Rays, stingrays, mantas nei	Atlantic, Eastern Central	Spiny butterfly ray	Gymnura altavela (Linnaeus, 1758)	4.5	Fisheries: minor commercial; gamefish: yes	3.73333
			Spinetail mobula	Mobula japanica (Müller & Henle, 1841)	3.4	Fisheries: commercial
			Lesser Guinean devil ray	Mobula rochebrunei (Vaillant, 1879)	3.9	Fisheries: commercial
			Smoothtail mobula	Mobula thurstoni (Lloyd, 1908)	3.1	Fisheries: minor commercial
			Common stingray	Dasyatis pastinaca (Linnaeus, 1758)	4.1	Fisheries: commercial; gamefish: yes
			Daisy stingray	Fontitrygon margarita (Günther, 1870)	3.4	Fisheries: commercial
C206	Rays, stingrays, mantas nei	Atlantic, Antarctic	Giant manta	Mobula birostris (Walbaum, 1792)	3.5	Fisheries: minor commercial	3.33333
			Spinetail mobula	Mobula japanica (Müller & Henle, 1841)	3.4	Fisheries: commercial
			Smoothtail mobula	Mobula thurstoni (Lloyd, 1908)	3.1	Fisheries: minor commercial
C207	Rocklings nei	Atlantic, Northeast, Mediterranean and Black Sea	Fivebeard rockling	Ciliata mustela (Linnaeus, 1758)	3.5	Fisheries: commercial	3.525
			Northern rockling	Ciliata septentrionalis (Collett, 1875)	3.5	Fisheries: commercial
			Fourbeard rockling	Enchelyopus cimbrius (Linnaeus, 1766)	3.5	Fisheries: minor commercial
			Mediterranean bigeye rockling	Gaidropsarus biscayensis (Collett, 1890)	3.6	Fisheries: minor commercial
C208	Sardinellas nei	Mediterranean and Black Sea, Atlantic, Northeast	Round sardinella	Sardinella aurita Valenciennes, 1847	3.4	Fisheries: highly commercial; bait: usually	3.3
			Madeiran sardinella	Sardinella maderensis (Lowe, 1838)	3.2	Fisheries: highly commercial; bait: usually
C209	Sardinellas nei	Atlantic, Eastern Central, Southeast	Round sardinella	Sardinella aurita Valenciennes, 1847	3.4	Fisheries: highly commercial; bait: usually	3.16667
			Madeiran sardinella	Sardinella maderensis (Lowe, 1838)	3.2	Fisheries: highly commercial; bait: usually
			Yellowtail sardinella	Sardinella rouxi (Poll, 1953)	2.9	Fisheries: minor commercial
C210	Sardinellas nei	Indian Ocean, Western	Spotted sardinella	Amblygaster sirm (Walbaum, 1792)	2.9	Fisheries: commercial; bait: usually	2.81
			Rainbow sardine	Dussumieria acuta Valenciennes, 1847	3.4	Fisheries: highly commercial
			White sardinella	Sardinella albella (Valenciennes, 1847)	2.6	Fisheries: commercial
			Deepbody sardinella	Sardinella brachysoma Bleeker, 1852	2.9	Fisheries: minor commercial
			Fringescale sardinella	Sardinella fimbriata (Valenciennes, 1847)	2.7	Fisheries: commercial
			Goldstripe sardinella	Sardinella gibbosa (Bleeker, 1849)	2.9	Fisheries: highly commercial
			Mauritian sardinella	Sardinella jussieu (Lacepède, 1803)	2.9	Fisheries: minor commercial
			Blacktip sardinella	Sardinella melanura (Cuvier, 1829)	2.9	Fisheries: minor commercial; bait: usually
			East African sardinella	Sardinella neglecta Wongratana, 1983	2	Fisheries: minor commercial
			Sind sardinella	Sardinella sindensis (Day, 1878)	2.9	Fisheries: minor commercial
C211	Sardinellas nei	Pacific, Western Central	Bleeker smoothbelly sardinella	Amblygaster clupeoides Bleeker, 1849	3.1	Fisheries: commercial; bait: usually	2.90769
			Spotted sardinella	Amblygaster sirm (Walbaum, 1792)	2.9	Fisheries: commercial; bait: usually
			Rainbow sardine	Dussumieria acuta Valenciennes, 1847	3.4	Fisheries: highly commercial
			White sardinella	Sardinella albella (Valenciennes, 1847)	2.6	Fisheries: commercial
			Bleeker's blacktip sardinella	Sardinella atricauda (Günther, 1868)	2.9	Fisheries: minor commercial
			Deepbody sardinella	Sardinella brachysoma Bleeker, 1852	2.9	Fisheries: minor commercial
			Fiji sardinella	Sardinella fijiensis (Fowler & Bean, 1923)	2.9	Fisheries: minor commercial; bait: usually
			Fringescale sardinella	Sardinella fimbriata (Valenciennes, 1847)	2.7	Fisheries: commercial
			Goldstripe sardinella	Sardinella gibbosa (Bleeker, 1849)	2.9	Fisheries: highly commercial
			Bali sardinella	Sardinella lemuru Bleeker, 1853	2.5	Fisheries: highly commercial
			Blacktip sardinella	Sardinella melanura (Cuvier, 1829)	2.9	Fisheries: minor commercial; bait: usually
			Richardson's sardinella	Sardinella richardsoni Wongratana, 1983	2.9	Fisheries: minor commercial
			Japanese sardinella	Sardinella zunasi (Bleeker, 1854)	3.2	Fisheries: highly commercial
C212	Sardinellas nei	Pacific, Northwest	Spotted sardinella	Amblygaster sirm (Walbaum, 1792)	2.9	Fisheries: commercial; bait: usually	2.89091
			Rainbow sardine	Dussumieria acuta Valenciennes, 1847	3.4	Fisheries: highly commercial
			White sardinella	Sardinella albella (Valenciennes, 1847)	2.6	Fisheries: commercial
			Deepbody sardinella	Sardinella brachysoma Bleeker, 1852	2.9	Fisheries: minor commercial
			Fringescale sardinella	Sardinella fimbriata (Valenciennes, 1847)	2.7	Fisheries: commercial
			Goldstripe sardinella	Sardinella gibbosa (Bleeker, 1849)	2.9	Fisheries: highly commercial
			Taiwan sardinella	Sardinella hualiensis (Chu & Tsai, 1958)	2.9	Fisheries: minor commercial
			Bali sardinella	Sardinella lemuru Bleeker, 1853	2.5	Fisheries: highly commercial
			Blacktip sardinella	Sardinella melanura (Cuvier, 1829)	2.9	Fisheries: minor commercial; bait: usually
			Richardson's sardinella	Sardinella richardsoni Wongratana, 1983	2.9	Fisheries: minor commercial
			Japanese sardinella	Sardinella zunasi (Bleeker, 1854)	3.2	Fisheries: highly commercial
C213	Sardinellas nei	Indian Ocean, Eastern	Bleeker smoothbelly sardinella	Amblygaster clupeoides Bleeker, 1849	3.1	Fisheries: commercial; bait: usually	2.87778
			Spotted sardinella	Amblygaster sirm (Walbaum, 1792)	2.9	Fisheries: commercial; bait: usually
			Rainbow sardine	Dussumieria acuta Valenciennes, 1847	3.4	Fisheries: highly commercial
			White sardinella	Sardinella albella (Valenciennes, 1847)	2.6	Fisheries: commercial
			Deepbody sardinella	Sardinella brachysoma Bleeker, 1852	2.9	Fisheries: minor commercial
			Fringescale sardinella	Sardinella fimbriata (Valenciennes, 1847)	2.7	Fisheries: commercial
			Goldstripe sardinella	Sardinella gibbosa (Bleeker, 1849)	2.9	Fisheries: highly commercial
			Bali sardinella	Sardinella lemuru Bleeker, 1853	2.5	Fisheries: highly commercial
			Blacktip sardinella	Sardinella melanura (Cuvier, 1829)	2.9	Fisheries: minor commercial; bait: usually
C214	Sargo breams nei	Atlantic, Southeast, Mediterranean and Black Sea, Eastern Central, Northeast	Zebra seabream	Diplodus cervinus (Lowe, 1838)	3	Fisheries: minor commercial; gamefish: yes	3.3
			White seabream	Diplodus sargus (Linnaeus, 1758)	3.4	Fisheries: minor commercial; aquaculture: commercial; gamefish: yes
			Common two-banded seabream	Diplodus vulgaris (Geoffroy Saint-Hilaire, 1817)	3.5	Fisheries: commercial; gamefish: yes; aquarium: commercial
C215	Sawsharks nei	Indian Ocean, Eastern	Common sawshark	Pristiophorus cirratus (Latham, 1794)	4.2	Fisheries: commercial	4.1
			Southern sawshark	Pristiophorus nudipinnis Günther, 1870	4	Fisheries: minor commercial
C216	Scads nei	Pacific, Western Central, Northwest, Southwest	Shrimp scad	Alepes djedaba (Forsskål, 1775)	3.3	Fisheries: commercial; gamefish: yes	3.61667
			Blackfin scad	Alepes melanoptera (Swainson, 1839)	3.4	Fisheries: minor commercial
			Herring scad	Alepes vari (Cuvier, 1833)	3.7	Fisheries: minor commercial
			Yellowtail scad	Atule mate (Cuvier, 1833)	4.2	Fisheries: minor commercial; gamefish: yes
			Mackerel scad	Decapterus macarellus (Cuvier, 1833)	4	Fisheries: commercial; gamefish: yes; bait: usually
			Shortfin scad	Decapterus macrosoma Bleeker, 1851	3.4	Fisheries: commercial; bait: usually
			Japanese scad	Decapterus maruadsi (Temminck & Schlegel, 1843)	3.4	Fisheries: highly commercial
			Indian scad	Decapterus russelli (Rüppell, 1830)	3.7	Fisheries: highly commercial; bait: occasionally
			Roughear scad	Decapterus tabl Berry, 1968	3.2	Fisheries: minor commercial; bait: usually
			Oxeye scad	Selar boops (Cuvier, 1833)	3.5	Fisheries: commercial
			Bigeye scad	Selar crumenophthalmus (Bloch, 1793)	3.8	Fisheries: highly commercial; gamefish: yes; bait: usually
			Yellowstripe scad	Selaroides leptolepis (Cuvier, 1833)	3.8	Fisheries: commercial
C217	Scads nei	Atlantic, Eastern Central	Mackerel scad	Decapterus macarellus (Cuvier, 1833)	4	Fisheries: commercial; gamefish: yes; bait: usually	4.06667
			Round scad	Decapterus punctatus (Cuvier, 1829)	4.4	Fisheries: minor commercial; bait: usually
			Bigeye scad	Selar crumenophthalmus (Bloch, 1793)	3.8	Fisheries: highly commercial; gamefish: yes; bait: usually
C218	Scads nei	Indian Ocean	Shrimp scad	Alepes djedaba (Forsskål, 1775)	3.3	Fisheries: commercial; gamefish: yes	3.67
			Blackfin scad	Alepes melanoptera (Swainson, 1839)	3.4	Fisheries: minor commercial
			Herring scad	Alepes vari (Cuvier, 1833)	3.7	Fisheries: minor commercial
			Yellowtail scad	Atule mate (Cuvier, 1833)	4.2	Fisheries: minor commercial; gamefish: yes
			Mackerel scad	Decapterus macarellus (Cuvier, 1833)	4	Fisheries: commercial; gamefish: yes; bait: usually
			Shortfin scad	Decapterus macrosoma Bleeker, 1851	3.4	Fisheries: commercial; bait: usually
			Japanese scad	Decapterus maruadsi (Temminck & Schlegel, 1843)	3.4	Fisheries: highly commercial
			Indian scad	Decapterus russelli (Rüppell, 1830)	3.7	Fisheries: highly commercial; bait: occasionally
			Bigeye scad	Selar crumenophthalmus (Bloch, 1793)	3.8	Fisheries: highly commercial; gamefish: yes; bait: usually
			Yellowstripe scad	Selaroides leptolepis (Cuvier, 1833)	3.8	Fisheries: commercial
C219	Scads nei	Pacific, Eastern Central	Mackerel scad	Decapterus macarellus (Cuvier, 1833)	4	Fisheries: commercial; gamefish: yes; bait: usually	3.56
			Shortfin scad	Decapterus macrosoma Bleeker, 1851	3.4	Fisheries: commercial; bait: usually
			Shortfin scad	Decapterus macrosoma Bleeker, 1851	3.4	Fisheries: commercial; bait: usually
			Roughear scad	Decapterus tabl Berry, 1968	3.2	Fisheries: minor commercial; bait: usually
			Bigeye scad	Selar crumenophthalmus (Bloch, 1793)	3.8	Fisheries: highly commercial; gamefish: yes; bait: usually
C220	Scads nei	Atlantic, Southeast, Western Central	Mackerel scad	Decapterus macarellus (Cuvier, 1833)	4	Fisheries: commercial; gamefish: yes; bait: usually	3.85
			Round scad	Decapterus punctatus (Cuvier, 1829)	4.4	Fisheries: minor commercial; bait: usually
			Roughear scad	Decapterus tabl Berry, 1968	3.2	Fisheries: minor commercial; bait: usually
			Bigeye scad	Selar crumenophthalmus (Bloch, 1793)	3.8	Fisheries: highly commercial; gamefish: yes; bait: usually
C221	Scorpionfishes, redfishes nei	Atlantic, Northeast, Eastern Central	Red scorpionfish	Scorpaena scrofa Linnaeus, 1758	4.3	Fisheries: commercial; aquarium: public aquariums	4.16667
			Beaked redfish	Sebastes mentella Travin, 1951	4.2	Fisheries: commercial
			Golden redfish	Sebastes norvegicus (Ascanius, 1772)	4	Fisheries: highly commercial; gamefish: yes
C222	Scorpionfishes, redfishes nei	Indian Ocean, Western	Red scorpionfish	Scorpaena scrofa Linnaeus, 1758	4.3	Fisheries: commercial; aquarium: public aquariums	4.25
			Humpbacked scorpionfish	Scorpaenopsis gibbosa (Bloch & Schneider, 1801)	4.2	Fisheries: minor commercial
C223	Scorpionfishes, redfishes nei	Pacific, Northwest, Western Central	Weedy stingfish	Scorpaenopsis cirrosa (Thunberg, 1793)	4.2	Fisheries: commercial	4
			Redfish	Centroberyx affinis (Günther, 1859)	3.8	Fisheries: commercial
C224	Scorpionfishes, redfishes nei	Atlantic, Western Central	Beaked redfish	Sebastes mentella Travin, 1951	4.2	Fisheries: commercial	4.1
			Golden redfish	Sebastes norvegicus (Ascanius, 1772)	4	Fisheries: highly commercial; gamefish: yes
C225	Sea catfishes nei	Atlantic, Southwest	Coco sea catfish	Bagre bagre (Linnaeus, 1766)	4	Fisheries: commercial	3.75
			Gafftopsail sea catfish	Bagre marinus (Mitchill, 1815)	3.5	Fisheries: commercial; gamefish: yes
C226	Sea catfishes nei	Indian Ocean, Eastern, Pacific, Southwest, Western Central	Spotted catfish	Arius maculatus (Thunberg, 1792)	3.4	Fisheries: commercial	3.67143
			Engraved catfish	Nemapteryx caelata (Valenciennes, 1840)	4	Fisheries: commercial
			Bronze catfish	Netuma bilineata (Valenciennes, 1840)	3.8	Fisheries: minor commercial
			Giant catfish	Netuma thalassina (Rüppell, 1837)	3.5	Fisheries: commercial; gamefish: yes
			Soldier catfish	Osteogeneiosus militaris (Linnaeus, 1758)	4	Fisheries: commercial
			Flatmouth sea catfish	Plicofollis platystomus (Day, 1877)	3.5	Fisheries: commercial
			Roughback sea catfish	Plicofollis tonggol (Bleeker, 1846)	3.5	Fisheries: commercial
C227	Sea catfishes nei	Atlantic, Western Central	Hardhead sea catfish	Ariopsis felis (Linnaeus, 1766)	3.2	Fisheries: minor commercial; gamefish: yes	3.35
			Gafftopsail sea catfish	Bagre marinus (Mitchill, 1815)	3.5	Fisheries: commercial; gamefish: yes
C228	Sea catfishes nei	Pacific, Southeast	Chilhuil sea catfish	Bagre panamensis (Gill, 1863)	4	Fisheries: commercial	4.03333
			Red sea catfish	Bagre pinnimaculatus (Steindachner, 1876)	4.5	Fisheries: commercial
			Peruvian sea catfish	Galeichthys peruvianus Lütken, 1874	3.6	Fisheries: commercial
C229	Sea catfishes nei	Indian Ocean, Western, Pacific, Northwest	Spotted catfish	Arius maculatus (Thunberg, 1792)	3.4	Fisheries: commercial	3.61667
			Bronze catfish	Netuma bilineata (Valenciennes, 1840)	3.8	Fisheries: minor commercial
			Giant catfish	Netuma thalassina (Rüppell, 1837)	3.5	Fisheries: commercial; gamefish: yes
			Soldier catfish	Osteogeneiosus militaris (Linnaeus, 1758)	4	Fisheries: commercial
			Flatmouth sea catfish	Plicofollis platystomus (Day, 1877)	3.5	Fisheries: commercial
			Roughback sea catfish	Plicofollis tonggol (Bleeker, 1846)	3.5	Fisheries: commercial
C230	Sea catfishes nei	Pacific, Eastern Central	Chilhuil sea catfish	Bagre panamensis (Gill, 1863)	4	Fisheries: commercial	4.25
			Red sea catfish	Bagre pinnimaculatus (Steindachner, 1876)	4.5	Fisheries: commercial
C231	Shads nei	Atlantic, Northeast, Mediterranean and Black Sea, Europe - Inland waters	Allis shad	Alosa alosa (Linnaeus, 1758)	3	Fisheries: minor commercial; gamefish: yes	3.5
			Twaite shad	Alosa fallax (Lacepède, 1803)	4	Fisheries: minor commercial
C232	Shads nei	Atlantic, Eastern Central, Africa - Inland waters	Allis shad	Alosa alosa (Linnaeus, 1758)	3	Fisheries: minor commercial; gamefish: yes	2.75
			Bonga shad	Ethmalosa fimbriata (Bowdich, 1825)	2.5	Fisheries: highly commercial; aquaculture: experimental
C233	Silversides(=Sand smelts) nei	Mediterranean and Black Sea	Mediterranean sand smelt	Atherina hepsetus Linnaeus, 1758	3.2	Fisheries: highly commercial	3.45
			Sand smelt	Atherina presbyter Cuvier, 1829	3.7	Fisheries: subsistence fisheries; gamefish: yes
C234	Silversides(=Sand smelts) nei	Pacific, Western Central, Asia - Inland waters	Wide-banded hardyhead silverside	Atherinomorus lacunosus (Forster, 1801)	3.3	Fisheries: commercial; bait: usually	3.25
			Sumatran silverside	Hypoatherina valenciennei (Bleeker, 1854)	3.2	Fisheries: minor commercial
C235	Silversides(=Sand smelts) nei	Atlantic, Northeast, Africa - Inland waters	Mediterranean sand smelt	Atherina hepsetus Linnaeus, 1758	3.2	Fisheries: highly commercial	3.46667
			Sand smelt	Atherina presbyter Cuvier, 1829	3.7	Fisheries: subsistence fisheries; gamefish: yes
			European smelt	Osmerus eperlanus (Linnaeus, 1758)	3.5	Fisheries: commercial
C236	Smelts nei	Europe - Inland waters	Mediterranean sand smelt	Atherina hepsetus Linnaeus, 1758	3.2	Fisheries: highly commercial	3.35
			European smelt	Osmerus eperlanus (Linnaeus, 1758)	3.5	Fisheries: commercial
C237	Smooth-hounds nei	Mediterranean and Black Sea, Atlantic, Northeast, Eastern	Smooth-hound	Mustelus mustelus (Linnaeus, 1758)	4.3	Fisheries: highly commercial; gamefish: yes	3.9
			Starry smooth-hound	Mustelus asterias Cloquet, 1819	3.6	Fisheries: commercial; gamefish: yes
			Blackspotted smooth-hound	Mustelus punctulatus Risso, 1827	3.8	Fisheries: commercial
C238	Smooth-hounds nei	Pacific, Southeast	Sharptooth smooth-hound	Mustelus dorsalis Gill, 1864	3.6	Fisheries: minor commercial	3.66667
			Brown smooth-hound	Mustelus henlei (Gill, 1863)	3.6	Fisheries: highly commercial; gamefish: yes
			Sicklefin smooth-hound	Mustelus lunulatus Jordan & Gilbert, 1882	3.9	Fisheries: commercial
			Speckled smooth-hound	Mustelus mento Cope, 1877	3.7	Fisheries: highly commercial
			Humpback smooth-hound	Mustelus whitneyi Chirichigno F., 1973	3.7	Fisheries: highly commercial; gamefish: yes
			Spotted houndshark	Triakis maculata Kner & Steindachner, 1867	3.5	Fisheries: minor commercial
C239	Smooth-hounds nei	Atlantic, Western Central	Dusky smooth-hound	Mustelus canis (Mitchill, 1815)	3.6	Fisheries: commercial; gamefish: yes	3.7
			Smalleye smooth-hound	Mustelus higmani Springer & Lowe, 1963	3.6	Fisheries: commercial
			Narrowfin smooth-hound	Mustelus norrisi Springer, 1939	3.9	Fisheries: minor commercial
C240	Snake mackerels, escolars nei	Global	Snake mackerel	Gempylus serpens Cuvier, 1829	4.4	Fisheries: minor commercial; bait: occasionally	4.3
			Roudi escolar	Promethichthys prometheus (Cuvier, 1832)	4.2	Fisheries: subsistence fisheries; gamefish: yes; bait: usually
C241	Snappers nei	Atlantic, Western Central	Queen snapper	Etelis oculatus (Valenciennes, 1828)	4.2	Fisheries: commercial	4
			Mutton snapper	Lutjanus analis (Cuvier, 1828)	3.9	Fisheries: highly commercial; gamefish: yes; aquarium: commercial
			Schoolmaster snapper	Lutjanus apodus (Walbaum, 1792)	4.3	Fisheries: commercial
			Blackfin snapper	Lutjanus buccanella (Cuvier, 1828)	3.9	Fisheries: commercial
			Northern red snapper	Lutjanus campechanus (Poey, 1860)	3.9	Fisheries: commercial; gamefish: yes
			Cubera snapper	Lutjanus cyanopterus (Cuvier, 1828)	4.4	Fisheries: commercial; gamefish: yes
			Grey snapper	Lutjanus griseus (Linnaeus, 1758)	4.2	Fisheries: commercial; gamefish: yes; aquarium: commercial
			Dog snapper	Lutjanus jocu (Bloch & Schneider, 1801)	4.4	Fisheries: commercial; aquarium: public aquariums
			Mahogany snapper	Lutjanus mahogoni (Cuvier, 1828)	4.3	Fisheries: commercial; gamefish: yes
			Southern red snapper	Lutjanus purpureus (Poey, 1866)	3.6	Fisheries: commercial
			Lane snapper	Lutjanus synagris (Linnaeus, 1758)	3.8	Fisheries: commercial; gamefish: yes; aquarium: public aquariums
			Silk snapper	Lutjanus vivanus (Cuvier, 1828)	3.1	Fisheries: commercial; gamefish: yes
			Yellowtail snapper	Ocyurus chrysurus (Bloch, 1791)	4	Fisheries: commercial; aquaculture: commercial; gamefish: yes; aquarium: public aquariums
C242	Snappers nei	Atlantic, Eastern Central	African forktail snapper	Apsilus fuscus Valenciennes, 1830	4	Fisheries: minor commercial	4
			African red snapper	Lutjanus agennes Bleeker, 1863	4	Fisheries: minor commercial; gamefish: yes
			Golden African snapper	Lutjanus fulgens (Valenciennes, 1830)	4	Fisheries: subsistence fisheries
			Gorean snapper	Lutjanus goreensis (Valenciennes, 1830)	4	Fisheries: minor commercial
C243	Snappers nei	Pacific, Southeast, Eastern Central	Yellow snapper	Lutjanus argentiventris (Peters, 1869)	4	Fisheries: commercial; aquaculture: experimental	3.94
			Colorado snapper	Lutjanus colorado Jordan & Gilbert, 1882	3.1	Fisheries: commercial
			Spotted rose snapper	Lutjanus guttatus (Steindachner, 1869)	4	Fisheries: commercial; gamefish: yes
			Jordan's snapper	Lutjanus jordani (Gilbert, 1898)	4.5	Fisheries: commercial; gamefish: yes
			Pacific dog snapper	Lutjanus novemfasciatus Gill, 1862	4.1	Fisheries: commercial; gamefish: yes
C244	Snappers nei	Pacific, Western Central	Deep-water red snapper	Etelis carbunculus Cuvier, 1828	4.5	Fisheries: highly commercial; gamefish: yes	3.97941
			Deepwater longtail red snapper	Etelis coruscans Valenciennes, 1862	4.4	Fisheries: highly commercial; gamefish: yes; bait: occasionally
			Pale snapper	Etelis radiosus Anderson, 1981	4.5	Fisheries: minor commercial; gamefish: yes
			Tang's snapper	Lipocheilus carnolabrum (Chan, 1970)	3.9	Fisheries: commercial
			Mangrove red snapper	Lutjanus argentimaculatus (Forsskål, 1775)	3.6	Fisheries: commercial; aquaculture: commercial; gamefish: yes
			Bengal snapper	Lutjanus bengalensis (Bloch, 1790)	3.8	Fisheries: commercial
			Two-spot banded snapper	Lutjanus biguttatus (Valenciennes, 1830)	4	Fisheries: commercial
			Two-spot red snapper	Lutjanus bohar (Forsskål, 1775)	4.3	Fisheries: commercial; gamefish: yes
			Moluccan snapper	Lutjanus boutton (Lacepède, 1802)	3.8	Fisheries: minor commercial
			Checkered snapper	Lutjanus decussatus (Cuvier, 1828)	4	Fisheries: commercial; aquarium: commercial
			Sunbeam snapper	Lutjanus dodecacanthoides (Bleeker, 1854)	3.8	Fisheries: minor commercial
			Blackspot snapper	Lutjanus ehrenbergii (Peters, 1869)	3.9	Fisheries: minor commercial
			Crimson snapper	Lutjanus erythropterus Bloch, 1790	4.5	Fisheries: commercial; aquaculture: commercial
			Dory snapper	Lutjanus fulviflamma (Forsskål, 1775)	3.8	Fisheries: commercial; gamefish: yes; aquarium: public aquariums
			Blacktail snapper	Lutjanus fulvus (Forster, 1801)	3.6	Fisheries: commercial; gamefish: yes; aquarium: commercial
			Humpback red snapper	Lutjanus gibbus (Forsskål, 1775)	4.1	Fisheries: commercial; gamefish: yes; aquarium: public aquariums
			John's snapper	Lutjanus johnii (Bloch, 1792)	4.2	Fisheries: commercial; aquaculture: commercial; gamefish: yes
			Common bluestripe snapper	Lutjanus kasmira (Forsskål, 1775)	3.9	Fisheries: commercial; gamefish: yes; aquarium: commercial
			Yellowstreaked snapper	Lutjanus lemniscatus (Valenciennes, 1828)	4	Fisheries: commercial
			Bigeye snapper	Lutjanus lutjanus Bloch, 1790	4.1	Fisheries: highly commercial
			Indian snapper	Lutjanus madras (Valenciennes, 1831)	3.8	Fisheries: commercial
			Malabar blood snapper	Lutjanus malabaricus (Bloch & Schneider, 1801)	4.5	Fisheries: highly commercial; gamefish: yes; aquarium: commercial
			One-spot snapper	Lutjanus monostigma (Cuvier, 1828)	4.3	Fisheries: commercial; aquaculture: commercial
			Five-lined snapper	Lutjanus quinquelineatus (Bloch, 1790)	3.7	Fisheries: commercial; gamefish: yes; aquarium: commercial
			Blubberlip snapper	Lutjanus rivulatus (Cuvier, 1828)	4.1	Fisheries: commercial; aquaculture: commercial; gamefish: yes
			Russell's snapper	Lutjanus russellii (Bleeker, 1849)	4.1	Fisheries: commercial; aquaculture: commercial
			Emperor red snapper	Lutjanus sebae (Cuvier, 1816)	4.1	Fisheries: commercial; aquaculture: commercial; gamefish: yes; aquarium: commercial
			Brownstripe red snapper	Lutjanus vitta (Quoy & Gaimard, 1824)	4	Fisheries: commercial; aquarium: public aquariums
			Midnight snapper	Macolor macularis Fowler, 1931	4	Fisheries: commercial; gamefish: yes
			Black and white snapper	Macolor niger (Forsskål, 1775)	4	Fisheries: commercial; gamefish: yes; aquarium: commercial
			Dirty ordure snapper	Paracaesio sordida Abe & Shinohara, 1962	2.8	Fisheries: commercial; gamefish: yes
			Yellowtail blue snapper	Paracaesio xanthura (Bleeker, 1869)	3.4	Fisheries: commercial
			Oblique-banded snapper	Pristipomoides zonatus (Valenciennes, 1830)	4	Fisheries: commercial; gamefish: yes
			Sailfin snapper	Symphorichthys spilurus (Günther, 1874)	3.8	Fisheries: minor commercial; aquarium: commercial
C245	Snappers nei	Indian Ocean, Eastern	Deep-water red snapper	Etelis carbunculus Cuvier, 1828	4.5	Fisheries: highly commercial; gamefish: yes	3.97143
			Deepwater longtail red snapper	Etelis coruscans Valenciennes, 1862	4.4	Fisheries: highly commercial; gamefish: yes; bait: occasionally
			Pale snapper	Etelis radiosus Anderson, 1981	4.5	Fisheries: minor commercial; gamefish: yes
			Tang's snapper	Lipocheilus carnolabrum (Chan, 1970)	3.9	Fisheries: commercial
			Mangrove red snapper	Lutjanus argentimaculatus (Forsskål, 1775)	3.6	Fisheries: commercial; aquaculture: commercial; gamefish: yes
			Bengal snapper	Lutjanus bengalensis (Bloch, 1790)	3.8	Fisheries: commercial
			Two-spot banded snapper	Lutjanus biguttatus (Valenciennes, 1830)	4	Fisheries: commercial
			Indonesian snapper	Lutjanus bitaeniatus (Valenciennes, 1830)	3.8	Fisheries: commercial
			Two-spot red snapper	Lutjanus bohar (Forsskål, 1775)	4.3	Fisheries: commercial; gamefish: yes
			Moluccan snapper	Lutjanus boutton (Lacepède, 1802)	3.8	Fisheries: minor commercial
			Checkered snapper	Lutjanus decussatus (Cuvier, 1828)	4	Fisheries: commercial; aquarium: commercial
			Blackspot snapper	Lutjanus ehrenbergii (Peters, 1869)	3.9	Fisheries: minor commercial
			Crimson snapper	Lutjanus erythropterus Bloch, 1790	4.5	Fisheries: commercial; aquaculture: commercial
			Dory snapper	Lutjanus fulviflamma (Forsskål, 1775)	3.8	Fisheries: commercial; gamefish: yes; aquarium: public aquariums
			Blacktail snapper	Lutjanus fulvus (Forster, 1801)	3.6	Fisheries: commercial; gamefish: yes; aquarium: commercial
			Humpback red snapper	Lutjanus gibbus (Forsskål, 1775)	4.1	Fisheries: commercial; gamefish: yes; aquarium: public aquariums
			Yellowfin red snapper	Lutjanus guilcheri Fourmanoir, 1959	3.7	Fisheries: commercial
			John's snapper	Lutjanus johnii (Bloch, 1792)	4.2	Fisheries: commercial; aquaculture: commercial; gamefish: yes
			Common bluestripe snapper	Lutjanus kasmira (Forsskål, 1775)	3.9	Fisheries: commercial; gamefish: yes; aquarium: commercial
			Yellowstreaked snapper	Lutjanus lemniscatus (Valenciennes, 1828)	4	Fisheries: commercial
			Bigeye snapper	Lutjanus lutjanus Bloch, 1790	4.1	Fisheries: highly commercial
			Indian snapper	Lutjanus madras (Valenciennes, 1831)	3.8	Fisheries: commercial
			Malabar blood snapper	Lutjanus malabaricus (Bloch & Schneider, 1801)	4.5	Fisheries: highly commercial; gamefish: yes; aquarium: commercial
			One-spot snapper	Lutjanus monostigma (Cuvier, 1828)	4.3	Fisheries: commercial; aquaculture: commercial
			Five-lined snapper	Lutjanus quinquelineatus (Bloch, 1790)	3.7	Fisheries: commercial; gamefish: yes; aquarium: commercial
			Blubberlip snapper	Lutjanus rivulatus (Cuvier, 1828)	4.1	Fisheries: commercial; aquaculture: commercial; gamefish: yes
			Russell's snapper	Lutjanus russellii (Bleeker, 1849)	4.1	Fisheries: commercial; aquaculture: commercial
			Emperor red snapper	Lutjanus sebae (Cuvier, 1816)	4.1	Fisheries: commercial; aquaculture: commercial; gamefish: yes; aquarium: commercial
			Brownstripe red snapper	Lutjanus vitta (Quoy & Gaimard, 1824)	4	Fisheries: commercial; aquarium: public aquariums
			Midnight snapper	Macolor macularis Fowler, 1931	4	Fisheries: commercial; gamefish: yes
			Black and white snapper	Macolor niger (Forsskål, 1775)	4	Fisheries: commercial; gamefish: yes; aquarium: commercial
			Dirty ordure snapper	Paracaesio sordida Abe & Shinohara, 1962	2.8	Fisheries: commercial; gamefish: yes
			Yellowtail blue snapper	Paracaesio xanthura (Bleeker, 1869)	3.4	Fisheries: commercial
			Oblique-banded snapper	Pristipomoides zonatus (Valenciennes, 1830)	4	Fisheries: commercial; gamefish: yes
			Sailfin snapper	Symphorichthys spilurus (Günther, 1874)	3.8	Fisheries: minor commercial; aquarium: commercial
C246	Snappers nei	Indian Ocean, Western	Deep-water red snapper	Etelis carbunculus Cuvier, 1828	4.5	Fisheries: highly commercial; gamefish: yes	3.97143
			Deepwater longtail red snapper	Etelis coruscans Valenciennes, 1862	4.4	Fisheries: highly commercial; gamefish: yes; bait: occasionally
			Mangrove red snapper	Lutjanus argentimaculatus (Forsskål, 1775)	3.6	Fisheries: commercial; aquaculture: commercial; gamefish: yes
			Bengal snapper	Lutjanus bengalensis (Bloch, 1790)	3.8	Fisheries: commercial
			Two-spot red snapper	Lutjanus bohar (Forsskål, 1775)	4.3	Fisheries: commercial; gamefish: yes
			Blackspot snapper	Lutjanus ehrenbergii (Peters, 1869)	3.9	Fisheries: minor commercial
			Crimson snapper	Lutjanus erythropterus Bloch, 1790	4.5	Fisheries: commercial; aquaculture: commercial
			Dory snapper	Lutjanus fulviflamma (Forsskål, 1775)	3.8	Fisheries: commercial; gamefish: yes; aquarium: public aquariums
			Blacktail snapper	Lutjanus fulvus (Forster, 1801)	3.6	Fisheries: commercial; gamefish: yes; aquarium: commercial
			Humpback red snapper	Lutjanus gibbus (Forsskål, 1775)	4.1	Fisheries: commercial; gamefish: yes; aquarium: public aquariums
			Yellowfin red snapper	Lutjanus guilcheri Fourmanoir, 1959	3.7	Fisheries: commercial
			John's snapper	Lutjanus johnii (Bloch, 1792)	4.2	Fisheries: commercial; aquaculture: commercial; gamefish: yes
			Common bluestripe snapper	Lutjanus kasmira (Forsskål, 1775)	3.9	Fisheries: commercial; gamefish: yes; aquarium: commercial
			Bigeye snapper	Lutjanus lutjanus Bloch, 1790	4.1	Fisheries: highly commercial
			Indian snapper	Lutjanus madras (Valenciennes, 1831)	3.8	Fisheries: commercial
			Malabar blood snapper	Lutjanus malabaricus (Bloch & Schneider, 1801)	4.5	Fisheries: highly commercial; gamefish: yes; aquarium: commercial
			One-spot snapper	Lutjanus monostigma (Cuvier, 1828)	4.3	Fisheries: commercial; aquaculture: commercial
			Bluestriped snapper	Lutjanus notatus (Cuvier, 1828)	4	Fisheries: commercial
			Five-lined snapper	Lutjanus quinquelineatus (Bloch, 1790)	3.7	Fisheries: commercial; gamefish: yes; aquarium: commercial
			Blubberlip snapper	Lutjanus rivulatus (Cuvier, 1828)	4.1	Fisheries: commercial; aquaculture: commercial; gamefish: yes
			Russell's snapper	Lutjanus russellii (Bleeker, 1849)	4.1	Fisheries: commercial; aquaculture: commercial
			Emperor red snapper	Lutjanus sebae (Cuvier, 1816)	4.1	Fisheries: commercial; aquaculture: commercial; gamefish: yes; aquarium: commercial
			Brownstripe red snapper	Lutjanus vitta (Quoy & Gaimard, 1824)	4	Fisheries: commercial; aquarium: public aquariums
			Midnight snapper	Macolor macularis Fowler, 1931	4	Fisheries: commercial; gamefish: yes
			Black and white snapper	Macolor niger (Forsskål, 1775)	4	Fisheries: commercial; gamefish: yes; aquarium: commercial
			Dirty ordure snapper	Paracaesio sordida Abe & Shinohara, 1962	2.8	Fisheries: commercial; gamefish: yes
			Yellowtail blue snapper	Paracaesio xanthura (Bleeker, 1869)	3.4	Fisheries: commercial
			Oblique-banded snapper	Pristipomoides zonatus (Valenciennes, 1830)	4	Fisheries: commercial; gamefish: yes
C247	Snappers nei	Pacific, Eastern Central	Yellow snapper	Lutjanus argentiventris (Peters, 1869)	4	Fisheries: commercial; aquaculture: experimental	3.94
			Colorado snapper	Lutjanus colorado Jordan & Gilbert, 1882	3.1	Fisheries: commercial
			Spotted rose snapper	Lutjanus guttatus (Steindachner, 1869)	4	Fisheries: commercial; gamefish: yes
			Jordan's snapper	Lutjanus jordani (Gilbert, 1898)	4.5	Fisheries: commercial; gamefish: yes
			Pacific dog snapper	Lutjanus novemfasciatus Gill, 1862	4.1	Fisheries: commercial; gamefish: yes
C248	Snappers nei	Atlantic, Western Central, Southwest	Queen snapper	Etelis oculatus (Valenciennes, 1828)	4.2	Fisheries: commercial	4
			Mutton snapper	Lutjanus analis (Cuvier, 1828)	3.9	Fisheries: highly commercial; gamefish: yes; aquarium: commercial
			Schoolmaster snapper	Lutjanus apodus (Walbaum, 1792)	4.3	Fisheries: commercial
			Blackfin snapper	Lutjanus buccanella (Cuvier, 1828)	3.9	Fisheries: commercial
			Northern red snapper	Lutjanus campechanus (Poey, 1860)	3.9	Fisheries: commercial; gamefish: yes
			Cubera snapper	Lutjanus cyanopterus (Cuvier, 1828)	4.4	Fisheries: commercial; gamefish: yes
			Grey snapper	Lutjanus griseus (Linnaeus, 1758)	4.2	Fisheries: commercial; gamefish: yes; aquarium: commercial
			Dog snapper	Lutjanus jocu (Bloch & Schneider, 1801)	4.4	Fisheries: commercial; aquarium: public aquariums
			Mahogany snapper	Lutjanus mahogoni (Cuvier, 1828)	4.3	Fisheries: commercial; gamefish: yes
			Southern red snapper	Lutjanus purpureus (Poey, 1866)	3.6	Fisheries: commercial
			Lane snapper	Lutjanus synagris (Linnaeus, 1758)	3.8	Fisheries: commercial; gamefish: yes; aquarium: public aquariums
			Silk snapper	Lutjanus vivanus (Cuvier, 1828)	3.1	Fisheries: commercial; gamefish: yes
			Yellowtail snapper	Ocyurus chrysurus (Bloch, 1791)	4	Fisheries: commercial; aquaculture: commercial; gamefish: yes; aquarium: public aquariums
C249	Snappers nei	Indian Ocean, Eastern	Small toothed jobfish	Aphareus furca (Lacepède, 1801)	4.1	Fisheries: commercial; gamefish: yes	3.975
			Rusty jobfish	Aphareus rutilans Cuvier, 1830	4.1	Fisheries: commercial; gamefish: yes
			Green jobfish	Aprion virescens Valenciennes, 1830	4.3	Fisheries: highly commercial; gamefish: yes; aquarium: commercial
			Deep-water red snapper	Etelis carbunculus Cuvier, 1828	4.5	Fisheries: highly commercial; gamefish: yes
			Deepwater longtail red snapper	Etelis coruscans Valenciennes, 1862	4.4	Fisheries: highly commercial; gamefish: yes; bait: occasionally
			Pale snapper	Etelis radiosus Anderson, 1981	4.5	Fisheries: minor commercial; gamefish: yes
			Tang's snapper	Lipocheilus carnolabrum (Chan, 1970)	3.9	Fisheries: commercial
			Mangrove red snapper	Lutjanus argentimaculatus (Forsskål, 1775)	3.6	Fisheries: commercial; aquaculture: commercial; gamefish: yes
			Bengal snapper	Lutjanus bengalensis (Bloch, 1790)	3.8	Fisheries: commercial
			Two-spot banded snapper	Lutjanus biguttatus (Valenciennes, 1830)	4	Fisheries: commercial
			Indonesian snapper	Lutjanus bitaeniatus (Valenciennes, 1830)	3.8	Fisheries: commercial
			Two-spot red snapper	Lutjanus bohar (Forsskål, 1775)	4.3	Fisheries: commercial; gamefish: yes
			Moluccan snapper	Lutjanus boutton (Lacepède, 1802)	3.8	Fisheries: minor commercial
			Checkered snapper	Lutjanus decussatus (Cuvier, 1828)	4	Fisheries: commercial; aquarium: commercial
			Blackspot snapper	Lutjanus ehrenbergii (Peters, 1869)	3.9	Fisheries: minor commercial
			Crimson snapper	Lutjanus erythropterus Bloch, 1790	4.5	Fisheries: commercial; aquaculture: commercial
			Dory snapper	Lutjanus fulviflamma (Forsskål, 1775)	3.8	Fisheries: commercial; gamefish: yes; aquarium: public aquariums
			Blacktail snapper	Lutjanus fulvus (Forster, 1801)	3.6	Fisheries: commercial; gamefish: yes; aquarium: commercial
			Humpback red snapper	Lutjanus gibbus (Forsskål, 1775)	4.1	Fisheries: commercial; gamefish: yes; aquarium: public aquariums
			Yellowfin red snapper	Lutjanus guilcheri Fourmanoir, 1959	3.7	Fisheries: commercial
			John's snapper	Lutjanus johnii (Bloch, 1792)	4.2	Fisheries: commercial; aquaculture: commercial; gamefish: yes
			Common bluestripe snapper	Lutjanus kasmira (Forsskål, 1775)	3.9	Fisheries: commercial; gamefish: yes; aquarium: commercial
			Yellowstreaked snapper	Lutjanus lemniscatus (Valenciennes, 1828)	4	Fisheries: commercial
			Bigeye snapper	Lutjanus lutjanus Bloch, 1790	4.1	Fisheries: highly commercial
			Indian snapper	Lutjanus madras (Valenciennes, 1831)	3.8	Fisheries: commercial
			Malabar blood snapper	Lutjanus malabaricus (Bloch & Schneider, 1801)	4.5	Fisheries: highly commercial; gamefish: yes; aquarium: commercial
			One-spot snapper	Lutjanus monostigma (Cuvier, 1828)	4.3	Fisheries: commercial; aquaculture: commercial
			Five-lined snapper	Lutjanus quinquelineatus (Bloch, 1790)	3.7	Fisheries: commercial; gamefish: yes; aquarium: commercial
			Blubberlip snapper	Lutjanus rivulatus (Cuvier, 1828)	4.1	Fisheries: commercial; aquaculture: commercial; gamefish: yes
			Russell's snapper	Lutjanus russellii (Bleeker, 1849)	4.1	Fisheries: commercial; aquaculture: commercial
			Emperor red snapper	Lutjanus sebae (Cuvier, 1816)	4.1	Fisheries: commercial; aquaculture: commercial; gamefish: yes; aquarium: commercial
			Brownstripe red snapper	Lutjanus vitta (Quoy & Gaimard, 1824)	4	Fisheries: commercial; aquarium: public aquariums
			Midnight snapper	Macolor macularis Fowler, 1931	4	Fisheries: commercial; gamefish: yes
			Black and white snapper	Macolor niger (Forsskål, 1775)	4	Fisheries: commercial; gamefish: yes; aquarium: commercial
			Dirty ordure snapper	Paracaesio sordida Abe & Shinohara, 1962	2.8	Fisheries: commercial; gamefish: yes
			Yellowtail blue snapper	Paracaesio xanthura (Bleeker, 1869)	3.4	Fisheries: commercial
			Ornate jobfish	Pristipomoides argyrogrammicus (Valenciennes, 1832)	4.2	Fisheries: minor commercial
			Goldflag jobfish	Pristipomoides auricilla (Jordan, Evermann & Tanaka, 1927)	3.9	Fisheries: commercial; gamefish: yes
			Crimson jobfish	Pristipomoides filamentosus (Valenciennes, 1830)	4.2	Fisheries: highly commercial; gamefish: yes
			Golden eye jobfish	Pristipomoides flavipinnis Shinohara, 1963	3.6	Fisheries: highly commercial
			Goldbanded jobfish	Pristipomoides multidens (Day, 1871)	3.8	Fisheries: commercial
			Lavender jobfish	Pristipomoides sieboldii (Bleeker, 1855)	3.7	Fisheries: commercial; gamefish: yes
			Oblique-banded snapper	Pristipomoides zonatus (Valenciennes, 1830)	4	Fisheries: commercial; gamefish: yes
			Sailfin snapper	Symphorichthys spilurus (Günther, 1874)	3.8	Fisheries: minor commercial; aquarium: commercial
C250	Snappers nei	Pacific, Southwest	Small toothed jobfish	Aphareus furca (Lacepède, 1801)	4.1	Fisheries: commercial; gamefish: yes	3.9814
			Rusty jobfish	Aphareus rutilans Cuvier, 1830	4.1	Fisheries: commercial; gamefish: yes
			Green jobfish	Aprion virescens Valenciennes, 1830	4.3	Fisheries: highly commercial; gamefish: yes; aquarium: commercial
			Deep-water red snapper	Etelis carbunculus Cuvier, 1828	4.5	Fisheries: highly commercial; gamefish: yes
			Deepwater longtail red snapper	Etelis coruscans Valenciennes, 1862	4.4	Fisheries: highly commercial; gamefish: yes; bait: occasionally
			Pale snapper	Etelis radiosus Anderson, 1981	4.5	Fisheries: minor commercial; gamefish: yes
			Tang's snapper	Lipocheilus carnolabrum (Chan, 1970)	3.9	Fisheries: commercial
			Mangrove red snapper	Lutjanus argentimaculatus (Forsskål, 1775)	3.6	Fisheries: commercial; aquaculture: commercial; gamefish: yes
			Bengal snapper	Lutjanus bengalensis (Bloch, 1790)	3.8	Fisheries: commercial
			Two-spot banded snapper	Lutjanus biguttatus (Valenciennes, 1830)	4	Fisheries: commercial
			Two-spot red snapper	Lutjanus bohar (Forsskål, 1775)	4.3	Fisheries: commercial; gamefish: yes
			Moluccan snapper	Lutjanus boutton (Lacepède, 1802)	3.8	Fisheries: minor commercial
			Checkered snapper	Lutjanus decussatus (Cuvier, 1828)	4	Fisheries: commercial; aquarium: commercial
			Sunbeam snapper	Lutjanus dodecacanthoides (Bleeker, 1854)	3.8	Fisheries: minor commercial
			Blackspot snapper	Lutjanus ehrenbergii (Peters, 1869)	3.9	Fisheries: minor commercial
			Crimson snapper	Lutjanus erythropterus Bloch, 1790	4.5	Fisheries: commercial; aquaculture: commercial
			Dory snapper	Lutjanus fulviflamma (Forsskål, 1775)	3.8	Fisheries: commercial; gamefish: yes; aquarium: public aquariums
			Blacktail snapper	Lutjanus fulvus (Forster, 1801)	3.6	Fisheries: commercial; gamefish: yes; aquarium: commercial
			Humpback red snapper	Lutjanus gibbus (Forsskål, 1775)	4.1	Fisheries: commercial; gamefish: yes; aquarium: public aquariums
			John's snapper	Lutjanus johnii (Bloch, 1792)	4.2	Fisheries: commercial; aquaculture: commercial; gamefish: yes
			Common bluestripe snapper	Lutjanus kasmira (Forsskål, 1775)	3.9	Fisheries: commercial; gamefish: yes; aquarium: commercial
			Yellowstreaked snapper	Lutjanus lemniscatus (Valenciennes, 1828)	4	Fisheries: commercial
			Bigeye snapper	Lutjanus lutjanus Bloch, 1790	4.1	Fisheries: highly commercial
			Indian snapper	Lutjanus madras (Valenciennes, 1831)	3.8	Fisheries: commercial
			Malabar blood snapper	Lutjanus malabaricus (Bloch & Schneider, 1801)	4.5	Fisheries: highly commercial; gamefish: yes; aquarium: commercial
			One-spot snapper	Lutjanus monostigma (Cuvier, 1828)	4.3	Fisheries: commercial; aquaculture: commercial
			Five-lined snapper	Lutjanus quinquelineatus (Bloch, 1790)	3.7	Fisheries: commercial; gamefish: yes; aquarium: commercial
			Blubberlip snapper	Lutjanus rivulatus (Cuvier, 1828)	4.1	Fisheries: commercial; aquaculture: commercial; gamefish: yes
			Russell's snapper	Lutjanus russellii (Bleeker, 1849)	4.1	Fisheries: commercial; aquaculture: commercial
			Emperor red snapper	Lutjanus sebae (Cuvier, 1816)	4.1	Fisheries: commercial; aquaculture: commercial; gamefish: yes; aquarium: commercial
			Brownstripe red snapper	Lutjanus vitta (Quoy & Gaimard, 1824)	4	Fisheries: commercial; aquarium: public aquariums
			Midnight snapper	Macolor macularis Fowler, 1931	4	Fisheries: commercial; gamefish: yes
			Black and white snapper	Macolor niger (Forsskål, 1775)	4	Fisheries: commercial; gamefish: yes; aquarium: commercial
			Dirty ordure snapper	Paracaesio sordida Abe & Shinohara, 1962	2.8	Fisheries: commercial; gamefish: yes
			Yellowtail blue snapper	Paracaesio xanthura (Bleeker, 1869)	3.4	Fisheries: commercial
			Ornate jobfish	Pristipomoides argyrogrammicus (Valenciennes, 1832)	4.2	Fisheries: minor commercial
			Goldflag jobfish	Pristipomoides auricilla (Jordan, Evermann & Tanaka, 1927)	3.9	Fisheries: commercial; gamefish: yes
			Crimson jobfish	Pristipomoides filamentosus (Valenciennes, 1830)	4.2	Fisheries: highly commercial; gamefish: yes
			Golden eye jobfish	Pristipomoides flavipinnis Shinohara, 1963	3.6	Fisheries: highly commercial
			Goldbanded jobfish	Pristipomoides multidens (Day, 1871)	3.8	Fisheries: commercial
			Lavender jobfish	Pristipomoides sieboldii (Bleeker, 1855)	3.7	Fisheries: commercial; gamefish: yes
			Oblique-banded snapper	Pristipomoides zonatus (Valenciennes, 1830)	4	Fisheries: commercial; gamefish: yes
			Sailfin snapper	Symphorichthys spilurus (Günther, 1874)	3.8	Fisheries: minor commercial; aquarium: commercial
C251	Snappers nei	Pacific, Western Central	Small toothed jobfish	Aphareus furca (Lacepède, 1801)	4.1	Fisheries: commercial; gamefish: yes	3.96818
			Rusty jobfish	Aphareus rutilans Cuvier, 1830	4.1	Fisheries: commercial; gamefish: yes
			Green jobfish	Aprion virescens Valenciennes, 1830	4.3	Fisheries: highly commercial; gamefish: yes; aquarium: commercial
			Deep-water red snapper	Etelis carbunculus Cuvier, 1828	4.5	Fisheries: highly commercial; gamefish: yes
			Deepwater longtail red snapper	Etelis coruscans Valenciennes, 1862	4.4	Fisheries: highly commercial; gamefish: yes; bait: occasionally
			Pale snapper	Etelis radiosus Anderson, 1981	4.5	Fisheries: minor commercial; gamefish: yes
			Tang's snapper	Lipocheilus carnolabrum (Chan, 1970)	3.9	Fisheries: commercial
			Mangrove red snapper	Lutjanus argentimaculatus (Forsskål, 1775)	3.6	Fisheries: commercial; aquaculture: commercial; gamefish: yes
			Bengal snapper	Lutjanus bengalensis (Bloch, 1790)	3.8	Fisheries: commercial
			Two-spot banded snapper	Lutjanus biguttatus (Valenciennes, 1830)	4	Fisheries: commercial
			Two-spot red snapper	Lutjanus bohar (Forsskål, 1775)	4.3	Fisheries: commercial; gamefish: yes
			Moluccan snapper	Lutjanus boutton (Lacepède, 1802)	3.8	Fisheries: minor commercial
			Checkered snapper	Lutjanus decussatus (Cuvier, 1828)	4	Fisheries: commercial; aquarium: commercial
			Sunbeam snapper	Lutjanus dodecacanthoides (Bleeker, 1854)	3.8	Fisheries: minor commercial
			Blackspot snapper	Lutjanus ehrenbergii (Peters, 1869)	3.9	Fisheries: minor commercial
			Crimson snapper	Lutjanus erythropterus Bloch, 1790	4.5	Fisheries: commercial; aquaculture: commercial
			Dory snapper	Lutjanus fulviflamma (Forsskål, 1775)	3.8	Fisheries: commercial; gamefish: yes; aquarium: public aquariums
			Blacktail snapper	Lutjanus fulvus (Forster, 1801)	3.6	Fisheries: commercial; gamefish: yes; aquarium: commercial
			Humpback red snapper	Lutjanus gibbus (Forsskål, 1775)	4.1	Fisheries: commercial; gamefish: yes; aquarium: public aquariums
			John's snapper	Lutjanus johnii (Bloch, 1792)	4.2	Fisheries: commercial; aquaculture: commercial; gamefish: yes
			Common bluestripe snapper	Lutjanus kasmira (Forsskål, 1775)	3.9	Fisheries: commercial; gamefish: yes; aquarium: commercial
			Yellowstreaked snapper	Lutjanus lemniscatus (Valenciennes, 1828)	4	Fisheries: commercial
			Bigeye snapper	Lutjanus lutjanus Bloch, 1790	4.1	Fisheries: highly commercial
			Indian snapper	Lutjanus madras (Valenciennes, 1831)	3.8	Fisheries: commercial
			Malabar blood snapper	Lutjanus malabaricus (Bloch & Schneider, 1801)	4.5	Fisheries: highly commercial; gamefish: yes; aquarium: commercial
			One-spot snapper	Lutjanus monostigma (Cuvier, 1828)	4.3	Fisheries: commercial; aquaculture: commercial
			Five-lined snapper	Lutjanus quinquelineatus (Bloch, 1790)	3.7	Fisheries: commercial; gamefish: yes; aquarium: commercial
			Blubberlip snapper	Lutjanus rivulatus (Cuvier, 1828)	4.1	Fisheries: commercial; aquaculture: commercial; gamefish: yes
			Russell's snapper	Lutjanus russellii (Bleeker, 1849)	4.1	Fisheries: commercial; aquaculture: commercial
			Emperor red snapper	Lutjanus sebae (Cuvier, 1816)	4.1	Fisheries: commercial; aquaculture: commercial; gamefish: yes; aquarium: commercial
			Brownstripe red snapper	Lutjanus vitta (Quoy & Gaimard, 1824)	4	Fisheries: commercial; aquarium: public aquariums
			Midnight snapper	Macolor macularis Fowler, 1931	4	Fisheries: commercial; gamefish: yes
			Black and white snapper	Macolor niger (Forsskål, 1775)	4	Fisheries: commercial; gamefish: yes; aquarium: commercial
			Japanese snapper	Paracaesio caerulea (Katayama, 1934)	3.4	Fisheries: commercial
			Dirty ordure snapper	Paracaesio sordida Abe & Shinohara, 1962	2.8	Fisheries: commercial; gamefish: yes
			Yellowtail blue snapper	Paracaesio xanthura (Bleeker, 1869)	3.4	Fisheries: commercial
			Ornate jobfish	Pristipomoides argyrogrammicus (Valenciennes, 1832)	4.2	Fisheries: minor commercial
			Goldflag jobfish	Pristipomoides auricilla (Jordan, Evermann & Tanaka, 1927)	3.9	Fisheries: commercial; gamefish: yes
			Crimson jobfish	Pristipomoides filamentosus (Valenciennes, 1830)	4.2	Fisheries: highly commercial; gamefish: yes
			Golden eye jobfish	Pristipomoides flavipinnis Shinohara, 1963	3.6	Fisheries: highly commercial
			Goldbanded jobfish	Pristipomoides multidens (Day, 1871)	3.8	Fisheries: commercial
			Lavender jobfish	Pristipomoides sieboldii (Bleeker, 1855)	3.7	Fisheries: commercial; gamefish: yes
			Oblique-banded snapper	Pristipomoides zonatus (Valenciennes, 1830)	4	Fisheries: commercial; gamefish: yes
			Sailfin snapper	Symphorichthys spilurus (Günther, 1874)	3.8	Fisheries: minor commercial; aquarium: commercial
C252	Snappers nei	Indian Ocean, Western	Small toothed jobfish	Aphareus furca (Lacepède, 1801)	4.1	Fisheries: commercial; gamefish: yes	3.98235
			Rusty jobfish	Aphareus rutilans Cuvier, 1830	4.1	Fisheries: commercial; gamefish: yes
			Green jobfish	Aprion virescens Valenciennes, 1830	4.3	Fisheries: highly commercial; gamefish: yes; aquarium: commercial
			Deep-water red snapper	Etelis carbunculus Cuvier, 1828	4.5	Fisheries: highly commercial; gamefish: yes
			Deepwater longtail red snapper	Etelis coruscans Valenciennes, 1862	4.4	Fisheries: highly commercial; gamefish: yes; bait: occasionally
			Mangrove red snapper	Lutjanus argentimaculatus (Forsskål, 1775)	3.6	Fisheries: commercial; aquaculture: commercial; gamefish: yes
			Bengal snapper	Lutjanus bengalensis (Bloch, 1790)	3.8	Fisheries: commercial
			Two-spot red snapper	Lutjanus bohar (Forsskål, 1775)	4.3	Fisheries: commercial; gamefish: yes
			Blackspot snapper	Lutjanus ehrenbergii (Peters, 1869)	3.9	Fisheries: minor commercial
			Crimson snapper	Lutjanus erythropterus Bloch, 1790	4.5	Fisheries: commercial; aquaculture: commercial
			Dory snapper	Lutjanus fulviflamma (Forsskål, 1775)	3.8	Fisheries: commercial; gamefish: yes; aquarium: public aquariums
			Blacktail snapper	Lutjanus fulvus (Forster, 1801)	3.6	Fisheries: commercial; gamefish: yes; aquarium: commercial
			Humpback red snapper	Lutjanus gibbus (Forsskål, 1775)	4.1	Fisheries: commercial; gamefish: yes; aquarium: public aquariums
			Yellowfin red snapper	Lutjanus guilcheri Fourmanoir, 1959	3.7	Fisheries: commercial
			John's snapper	Lutjanus johnii (Bloch, 1792)	4.2	Fisheries: commercial; aquaculture: commercial; gamefish: yes
			Common bluestripe snapper	Lutjanus kasmira (Forsskål, 1775)	3.9	Fisheries: commercial; gamefish: yes; aquarium: commercial
			Bigeye snapper	Lutjanus lutjanus Bloch, 1790	4.1	Fisheries: highly commercial
			Indian snapper	Lutjanus madras (Valenciennes, 1831)	3.8	Fisheries: commercial
			Malabar blood snapper	Lutjanus malabaricus (Bloch & Schneider, 1801)	4.5	Fisheries: highly commercial; gamefish: yes; aquarium: commercial
			One-spot snapper	Lutjanus monostigma (Cuvier, 1828)	4.3	Fisheries: commercial; aquaculture: commercial
			Bluestriped snapper	Lutjanus notatus (Cuvier, 1828)	4	Fisheries: commercial
			Five-lined snapper	Lutjanus quinquelineatus (Bloch, 1790)	3.7	Fisheries: commercial; gamefish: yes; aquarium: commercial
			Blubberlip snapper	Lutjanus rivulatus (Cuvier, 1828)	4.1	Fisheries: commercial; aquaculture: commercial; gamefish: yes
			Russell's snapper	Lutjanus russellii (Bleeker, 1849)	4.1	Fisheries: commercial; aquaculture: commercial
			Emperor red snapper	Lutjanus sebae (Cuvier, 1816)	4.1	Fisheries: commercial; aquaculture: commercial; gamefish: yes; aquarium: commercial
			Brownstripe red snapper	Lutjanus vitta (Quoy & Gaimard, 1824)	4	Fisheries: commercial; aquarium: public aquariums
			Midnight snapper	Macolor macularis Fowler, 1931	4	Fisheries: commercial; gamefish: yes
			Black and white snapper	Macolor niger (Forsskål, 1775)	4	Fisheries: commercial; gamefish: yes; aquarium: commercial
			Dirty ordure snapper	Paracaesio sordida Abe & Shinohara, 1962	2.8	Fisheries: commercial; gamefish: yes
			Yellowtail blue snapper	Paracaesio xanthura (Bleeker, 1869)	3.4	Fisheries: commercial
			Crimson jobfish	Pristipomoides filamentosus (Valenciennes, 1830)	4.2	Fisheries: highly commercial; gamefish: yes
			Goldbanded jobfish	Pristipomoides multidens (Day, 1871)	3.8	Fisheries: commercial
			Lavender jobfish	Pristipomoides sieboldii (Bleeker, 1855)	3.7	Fisheries: commercial; gamefish: yes
			Oblique-banded snapper	Pristipomoides zonatus (Valenciennes, 1830)	4	Fisheries: commercial; gamefish: yes
C253	Snappers nei	Pacific, Northwest	Small toothed jobfish	Aphareus furca (Lacepède, 1801)	4.1	Fisheries: commercial; gamefish: yes	3.97273
			Rusty jobfish	Aphareus rutilans Cuvier, 1830	4.1	Fisheries: commercial; gamefish: yes
			Green jobfish	Aprion virescens Valenciennes, 1830	4.3	Fisheries: highly commercial; gamefish: yes; aquarium: commercial
			Deep-water red snapper	Etelis carbunculus Cuvier, 1828	4.5	Fisheries: highly commercial; gamefish: yes
			Deepwater longtail red snapper	Etelis coruscans Valenciennes, 1862	4.4	Fisheries: highly commercial; gamefish: yes; bait: occasionally
			Pale snapper	Etelis radiosus Anderson, 1981	4.5	Fisheries: minor commercial; gamefish: yes
			Tang's snapper	Lipocheilus carnolabrum (Chan, 1970)	3.9	Fisheries: commercial
			Mangrove red snapper	Lutjanus argentimaculatus (Forsskål, 1775)	3.6	Fisheries: commercial; aquaculture: commercial; gamefish: yes
			Bengal snapper	Lutjanus bengalensis (Bloch, 1790)	3.8	Fisheries: commercial
			Two-spot banded snapper	Lutjanus biguttatus (Valenciennes, 1830)	4	Fisheries: commercial
			Two-spot red snapper	Lutjanus bohar (Forsskål, 1775)	4.3	Fisheries: commercial; gamefish: yes
			Moluccan snapper	Lutjanus boutton (Lacepède, 1802)	3.8	Fisheries: minor commercial
			Checkered snapper	Lutjanus decussatus (Cuvier, 1828)	4	Fisheries: commercial; aquarium: commercial
			Blackspot snapper	Lutjanus ehrenbergii (Peters, 1869)	3.9	Fisheries: minor commercial
			Crimson snapper	Lutjanus erythropterus Bloch, 1790	4.5	Fisheries: commercial; aquaculture: commercial
			Dory snapper	Lutjanus fulviflamma (Forsskål, 1775)	3.8	Fisheries: commercial; gamefish: yes; aquarium: public aquariums
			Blacktail snapper	Lutjanus fulvus (Forster, 1801)	3.6	Fisheries: commercial; gamefish: yes; aquarium: commercial
			Humpback red snapper	Lutjanus gibbus (Forsskål, 1775)	4.1	Fisheries: commercial; gamefish: yes; aquarium: public aquariums
			John's snapper	Lutjanus johnii (Bloch, 1792)	4.2	Fisheries: commercial; aquaculture: commercial; gamefish: yes
			Common bluestripe snapper	Lutjanus kasmira (Forsskål, 1775)	3.9	Fisheries: commercial; gamefish: yes; aquarium: commercial
			Yellowstreaked snapper	Lutjanus lemniscatus (Valenciennes, 1828)	4	Fisheries: commercial
			Bigeye snapper	Lutjanus lutjanus Bloch, 1790	4.1	Fisheries: highly commercial
			Indian snapper	Lutjanus madras (Valenciennes, 1831)	3.8	Fisheries: commercial
			Malabar blood snapper	Lutjanus malabaricus (Bloch & Schneider, 1801)	4.5	Fisheries: highly commercial; gamefish: yes; aquarium: commercial
			One-spot snapper	Lutjanus monostigma (Cuvier, 1828)	4.3	Fisheries: commercial; aquaculture: commercial
			Five-lined snapper	Lutjanus quinquelineatus (Bloch, 1790)	3.7	Fisheries: commercial; gamefish: yes; aquarium: commercial
			Blubberlip snapper	Lutjanus rivulatus (Cuvier, 1828)	4.1	Fisheries: commercial; aquaculture: commercial; gamefish: yes
			Russell's snapper	Lutjanus russellii (Bleeker, 1849)	4.1	Fisheries: commercial; aquaculture: commercial
			Emperor red snapper	Lutjanus sebae (Cuvier, 1816)	4.1	Fisheries: commercial; aquaculture: commercial; gamefish: yes; aquarium: commercial
			Star snapper	Lutjanus stellatus Akazaki, 1983	4	Fisheries: commercial; aquaculture: commercial
			Brownstripe red snapper	Lutjanus vitta (Quoy & Gaimard, 1824)	4	Fisheries: commercial; aquarium: public aquariums
			Midnight snapper	Macolor macularis Fowler, 1931	4	Fisheries: commercial; gamefish: yes
			Black and white snapper	Macolor niger (Forsskål, 1775)	4	Fisheries: commercial; gamefish: yes; aquarium: commercial
			Japanese snapper	Paracaesio caerulea (Katayama, 1934)	3.4	Fisheries: commercial
			Dirty ordure snapper	Paracaesio sordida Abe & Shinohara, 1962	2.8	Fisheries: commercial; gamefish: yes
			Yellowtail blue snapper	Paracaesio xanthura (Bleeker, 1869)	3.4	Fisheries: commercial
			Ornate jobfish	Pristipomoides argyrogrammicus (Valenciennes, 1832)	4.2	Fisheries: minor commercial
			Goldflag jobfish	Pristipomoides auricilla (Jordan, Evermann & Tanaka, 1927)	3.9	Fisheries: commercial; gamefish: yes
			Crimson jobfish	Pristipomoides filamentosus (Valenciennes, 1830)	4.2	Fisheries: highly commercial; gamefish: yes
			Golden eye jobfish	Pristipomoides flavipinnis Shinohara, 1963	3.6	Fisheries: highly commercial
			Goldbanded jobfish	Pristipomoides multidens (Day, 1871)	3.8	Fisheries: commercial
			Lavender jobfish	Pristipomoides sieboldii (Bleeker, 1855)	3.7	Fisheries: commercial; gamefish: yes
			Oblique-banded snapper	Pristipomoides zonatus (Valenciennes, 1830)	4	Fisheries: commercial; gamefish: yes
			Sailfin snapper	Symphorichthys spilurus (Günther, 1874)	3.8	Fisheries: minor commercial; aquarium: commercial
C254	Snooks(=Robalos) nei	Atlantic, Southwest, Western Centra	Swordspine snook	Centropomus ensiferus Poey, 1860	4.2	Fisheries: minor commercial	4.2
			Fat snook	Centropomus parallelus Poey, 1860	4.2	Fisheries: minor commercial; gamefish: yes
			Common snook	Centropomus undecimalis (Bloch, 1792)	4.2	Fisheries: commercial; aquaculture: commercial; gamefish: yes
C255	Snooks(=Robalos) nei	Pacific, Southeast	Black snook	Centropomus nigrescens Günther, 1864	4.2	Fisheries: commercial; gamefish: yes	4.05
			Union snook	Centropomus unionensis Bocourt, 1868	3.9	Fisheries: commercial; gamefish: yes
C256	Snooks(=Robalos) nei	America, North - Inland waters	Black snook	Centropomus nigrescens Günther, 1864	4.2	Fisheries: commercial; gamefish: yes	4.08333
			Yellowfin snook	Centropomus robalito Jordan & Gilbert, 1882	3.8	Fisheries: commercial; gamefish: yes
			Union snook	Centropomus unionensis Bocourt, 1868	3.9	Fisheries: commercial; gamefish: yes
			Swordspine snook	Centropomus ensiferus Poey, 1860	4.2	Fisheries: minor commercial
			Fat snook	Centropomus parallelus Poey, 1860	4.2	Fisheries: minor commercial; gamefish: yes
			Common snook	Centropomus undecimalis (Bloch, 1792)	4.2	Fisheries: commercial; aquaculture: commercial; gamefish: yes
C257	Snooks(=Robalos) nei	Pacific, Eastern Central	Black snook	Centropomus nigrescens Günther, 1864	4.2	Fisheries: commercial; gamefish: yes	3.96667
			Yellowfin snook	Centropomus robalito Jordan & Gilbert, 1882	3.8	Fisheries: commercial; gamefish: yes
			Union snook	Centropomus unionensis Bocourt, 1868	3.9	Fisheries: commercial; gamefish: yes
C258	Soles nei	Atlantic, Eastern Central	Deepwater sole	Bathysolea profundicola (Vaillant, 1888)	3.2	Fisheries: commercial	3.38182
			Solenette	Buglossidium luteum (Risso, 1810)	3.3	Fisheries: minor commercial
			Senegalese tonguesole	Cynoglossus senegalensis (Kaup, 1858)	3.6	Fisheries: commercial
			Portuguese sole	Dagetichthys lusitanicus (de Brito Capello, 1868)	3.6	Fisheries: commercial
			Wedge sole	Dicologlossa cuneata (Moreau, 1881)	3.3	Fisheries: commercial
			Thickback sole	Microchirus variegatus (Donovan, 1808)	3.3	Fisheries: commercial
			Sand sole	Pegusa lascaris (Risso, 1810)	3.3	Fisheries: minor commercial
			Senegalese sole	Solea senegalensis Kaup, 1858	3.3	Fisheries: commercial; aquaculture: experimental
			Common sole	Solea solea (Linnaeus, 1758)	3.2	Fisheries: highly commercial; aquaculture: commercial; gamefish: yes; aquarium: public aquariums
			Tonguesole	Symphurus nigrescens Rafinesque, 1810	3.5	Fisheries: commercial
			Klein's sole	Synapturichthys kleinii (Risso, 1827)	3.6	Fisheries: commercial
C259	Soles nei	Mediterranean and Black Sea, Atlantic, Northeast	Deepwater sole	Bathysolea profundicola (Vaillant, 1888)	3.2	Fisheries: commercial	3.33333
			Solenette	Buglossidium luteum (Risso, 1810)	3.3	Fisheries: minor commercial
			Wedge sole	Dicologlossa cuneata (Moreau, 1881)	3.3	Fisheries: commercial
			Thickback sole	Microchirus variegatus (Donovan, 1808)	3.3	Fisheries: commercial
			Sand sole	Pegusa lascaris (Risso, 1810)	3.3	Fisheries: minor commercial
			Senegalese sole	Solea senegalensis Kaup, 1858	3.3	Fisheries: commercial; aquaculture: experimental
			Common sole	Solea solea (Linnaeus, 1758)	3.2	Fisheries: highly commercial; aquaculture: commercial; gamefish: yes; aquarium: public aquariums
			Tonguesole	Symphurus nigrescens Rafinesque, 1810	3.5	Fisheries: commercial
			Klein's sole	Synapturichthys kleinii (Risso, 1827)	3.6	Fisheries: commercial
C260	Sorubims nei	America, South - Inland waters	Barred sorubim	Pseudoplatystoma fasciatum (Linnaeus, 1766)	4.4	Fisheries: commercial; gamefish: yes; aquarium: public aquariums	4.46667
			Spotted sorubim	Pseudoplatystoma corruscans (Spix & Agassiz, 1829)	4.5	Fisheries: commercial; aquaculture: commercial; gamefish: yes
			Tiger sorubim	Pseudoplatystoma tigrinum (Valenciennes, 1840)	4.5	Fisheries: commercial; gamefish: yes; aquarium: public aquariums
C261	Southeast Atlantic soles nei	Atlantic, Southeast	Deepwater sole	Bathysolea profundicola (Vaillant, 1888)	3.2	Fisheries: commercial	3.4
			Solenette	Buglossidium luteum (Risso, 1810)	3.3	Fisheries: minor commercial
			Senegalese tonguesole	Cynoglossus senegalensis (Kaup, 1858)	3.6	Fisheries: commercial
			Portuguese sole	Dagetichthys lusitanicus (de Brito Capello, 1868)	3.6	Fisheries: commercial
			Wedge sole	Dicologlossa cuneata (Moreau, 1881)	3.3	Fisheries: commercial
			Thickback sole	Microchirus variegatus (Donovan, 1808)	3.3	Fisheries: commercial
			Sand sole	Pegusa lascaris (Risso, 1810)	3.3	Fisheries: minor commercial
			Senegalese sole	Solea senegalensis Kaup, 1858	3.3	Fisheries: commercial; aquaculture: experimental
			Tonguesole	Symphurus nigrescens Rafinesque, 1810	3.5	Fisheries: commercial
			Klein's sole	Synapturichthys kleinii (Risso, 1827)	3.6	Fisheries: commercial
C262	Spinefeet(=Rabbitfishes) nei	Indian Ocean, Western	Streamlined spinefoot	Siganus argenteus (Quoy & Gaimard, 1825)	2	Fisheries: commercial; aquarium: commercial	2.21
			Blue-spotted spinefoot	Siganus corallinus (Valenciennes, 1835)	2	Fisheries: commercial; aquarium: commercial
			Barred spinefoot	Siganus doliatus Guérin-Méneville, 1829-38	2	Fisheries: minor commercial
			Mottled spinefoot	Siganus fuscescens (Houttuyn, 1782)	2	Fisheries: commercial; aquaculture: commercial
			Orange-spotted spinefoot	Siganus guttatus (Bloch, 1787)	2.7	Fisheries: commercial; aquaculture: commercial; aquarium: commercial
			Streaked spinefoot	Siganus javus (Linnaeus, 1766)	2.4	Fisheries: commercial; aquarium: commercial
			Dusky spinefoot	Siganus luridus (Rüppell, 1829)	2	Fisheries: minor commercial
			Marbled spinefoot	Siganus rivulatus Forsskål & Niebuhr, 1775	2	Fisheries: minor commercial; aquaculture: commercial
			Brown-spotted spinefoot	Siganus stellatus (Forsskål, 1775)	2.7	Fisheries: commercial; aquarium: commercial
			Shoemaker spinefoot	Siganus sutor (Valenciennes, 1835)	2.3	Fisheries: commercial
C263	Spinefeet(=Rabbitfishes) nei	Pacific, Western Central	Streamlined spinefoot	Siganus argenteus (Quoy & Gaimard, 1825)	2	Fisheries: commercial; aquarium: commercial	2.25
			Blue-spotted spinefoot	Siganus corallinus (Valenciennes, 1835)	2	Fisheries: commercial; aquarium: commercial
			Barred spinefoot	Siganus doliatus Guérin-Méneville, 1829-38	2	Fisheries: minor commercial
			Mottled spinefoot	Siganus fuscescens (Houttuyn, 1782)	2	Fisheries: commercial; aquaculture: commercial
			Orange-spotted spinefoot	Siganus guttatus (Bloch, 1787)	2.7	Fisheries: commercial; aquaculture: commercial; aquarium: commercial
			Streaked spinefoot	Siganus javus (Linnaeus, 1766)	2.4	Fisheries: commercial; aquarium: commercial
			Golden-lined spinefoot	Siganus lineatus (Valenciennes, 1835)	2	Fisheries: commercial; aquarium: commercial
			Masked spinefoot	Siganus puellus (Schlegel, 1852)	3	Fisheries: minor commercial; aquarium: commercial
			Peppered spinefoot	Siganus punctatissimus Fowler & Bean, 1929	2	Fisheries: minor commercial
			Goldspotted spinefoot	Siganus punctatus (Schneider & Forster, 1801)	2	Fisheries: commercial
			Little spinefoot	Siganus spinus (Linnaeus, 1758)	2	Fisheries: minor commercial; aquarium: commercial
			Brown-spotted spinefoot	Siganus stellatus (Forsskål, 1775)	2.7	Fisheries: commercial; aquarium: commercial
			Vermiculated spinefoot	Siganus vermiculatus (Valenciennes, 1835)	2	Fisheries: commercial; aquaculture: likely future use; aquarium: commercial
			Barhead spinefoot	Siganus virgatus (Valenciennes, 1835)	2.7	Fisheries: minor commercial; aquarium: commercial
C264	Spinefeet(=Rabbitfishes) nei	Mediterranean and Black Sea	Dusky spinefoot	Siganus luridus (Rüppell, 1829)	2	Fisheries: minor commercial	2
			Marbled spinefoot	Siganus rivulatus Forsskål & Niebuhr, 1775	2	Fisheries: minor commercial; aquaculture: commercial
C265	Spinefeet(=Rabbitfishes) nei	Indian Ocean, Eastern	Streamlined spinefoot	Siganus argenteus (Quoy & Gaimard, 1825)	2	Fisheries: commercial; aquarium: commercial	2.25333
			Blue-spotted spinefoot	Siganus corallinus (Valenciennes, 1835)	2	Fisheries: commercial; aquarium: commercial
			Barred spinefoot	Siganus doliatus Guérin-Méneville, 1829-38	2	Fisheries: minor commercial
			Mottled spinefoot	Siganus fuscescens (Houttuyn, 1782)	2	Fisheries: commercial; aquaculture: commercial
			Orange-spotted spinefoot	Siganus guttatus (Bloch, 1787)	2.7	Fisheries: commercial; aquaculture: commercial; aquarium: commercial
			Streaked spinefoot	Siganus javus (Linnaeus, 1766)	2.4	Fisheries: commercial; aquarium: commercial
			Golden-lined spinefoot	Siganus lineatus (Valenciennes, 1835)	2	Fisheries: commercial; aquarium: commercial
			Masked spinefoot	Siganus puellus (Schlegel, 1852)	3	Fisheries: minor commercial; aquarium: commercial
			Peppered spinefoot	Siganus punctatissimus Fowler & Bean, 1929	2	Fisheries: minor commercial
			Goldspotted spinefoot	Siganus punctatus (Schneider & Forster, 1801)	2	Fisheries: commercial
			Little spinefoot	Siganus spinus (Linnaeus, 1758)	2	Fisheries: minor commercial; aquarium: commercial
			Brown-spotted spinefoot	Siganus stellatus (Forsskål, 1775)	2.7	Fisheries: commercial; aquarium: commercial
			Shoemaker spinefoot	Siganus sutor (Valenciennes, 1835)	2.3	Fisheries: commercial
			Vermiculated spinefoot	Siganus vermiculatus (Valenciennes, 1835)	2	Fisheries: commercial; aquaculture: likely future use; aquarium: commercial
			Barhead spinefoot	Siganus virgatus (Valenciennes, 1835)	2.7	Fisheries: minor commercial; aquarium: commercial
C266	Squirrelfishes nei	Atlantic, Western Central	Squirrelfish	Holocentrus adscensionis (Osbeck, 1765)	3.1	Fisheries: minor commercial; aquarium: public aquariums	3.33333
			Longspine squirrelfish	Holocentrus rufus (Walbaum, 1792)	3.5	Fisheries: minor commercial; aquarium: commercial
			Blackbar soldierfish	Myripristis jacobus Cuvier, 1829	3.4	Fisheries: minor commercial; aquarium: commercial
C267	Squirrelfishes nei	Indian Ocean, Western	Shadowfin soldierfish	Myripristis adusta Bleeker, 1853	3.4	Fisheries: minor commercial	3.59091
			Blotcheye soldierfish	Myripristis berndti Jordan & Evermann, 1903	3.7	Fisheries: commercial; aquarium: commercial
			Blacktip soldierfish	Myripristis botche Cuvier, 1829	4	Fisheries: minor commercial; aquarium: commercial
			Doubletooth soldierfish	Myripristis hexagona (Lacepède, 1802)	3.1	Fisheries: minor commercial
			Shoulderbar soldierfish	Myripristis kuntee Valenciennes, 1831	3.4	Fisheries: minor commercial; aquarium: commercial
			Pinecone soldierfish	Myripristis murdjan (Forsskål, 1775)	3.4	Fisheries: minor commercial; aquarium: commercial
			Sammara squirrelfish	Neoniphon sammara (Forsskål, 1775)	3.6	Fisheries: minor commercial; aquarium: commercial; bait: usually
			Deepwater soldierfish	Ostichthys kaianus (Günther, 1880)	4	Fisheries: commercial
			Silverspot squirrelfish	Sargocentron caudimaculatum (Rüppell, 1838)	3.9	Fisheries: minor commercial; aquarium: commercial
			Crown squirrelfish	Sargocentron diadema (Lacepède, 1802)	3.4	Fisheries: minor commercial; aquarium: commercial
			Sabre squirrelfish	Sargocentron spiniferum (Forsskål, 1775)	3.6	Fisheries: minor commercial; aquarium: public aquariums
C268	Squirrelfishes nei	Pacific, Western Central	Shadowfin soldierfish	Myripristis adusta Bleeker, 1853	3.4	Fisheries: minor commercial	3.625
			Blotcheye soldierfish	Myripristis berndti Jordan & Evermann, 1903	3.7	Fisheries: commercial; aquarium: commercial
			Blacktip soldierfish	Myripristis botche Cuvier, 1829	4	Fisheries: minor commercial; aquarium: commercial
			Doubletooth soldierfish	Myripristis hexagona (Lacepède, 1802)	3.1	Fisheries: minor commercial
			Shoulderbar soldierfish	Myripristis kuntee Valenciennes, 1831	3.4	Fisheries: minor commercial; aquarium: commercial
			Pinecone soldierfish	Myripristis murdjan (Forsskål, 1775)	3.4	Fisheries: minor commercial; aquarium: commercial
			Sammara squirrelfish	Neoniphon sammara (Forsskål, 1775)	3.6	Fisheries: minor commercial; aquarium: commercial; bait: usually
			Japanese soldierfish	Ostichthys japonicus (Cuvier, 1829)	4	Fisheries: commercial
			Deepwater soldierfish	Ostichthys kaianus (Günther, 1880)	4	Fisheries: commercial
			Silverspot squirrelfish	Sargocentron caudimaculatum (Rüppell, 1838)	3.9	Fisheries: minor commercial; aquarium: commercial
			Crown squirrelfish	Sargocentron diadema (Lacepède, 1802)	3.4	Fisheries: minor commercial; aquarium: commercial
			Sabre squirrelfish	Sargocentron spiniferum (Forsskål, 1775)	3.6	Fisheries: minor commercial; aquarium: public aquariums
C269	Squirrelfishes nei	Pacific, Eastern Central	Shadowfin soldierfish	Myripristis adusta Bleeker, 1853	3.4	Fisheries: minor commercial	3.64286
			Blotcheye soldierfish	Myripristis berndti Jordan & Evermann, 1903	3.7	Fisheries: commercial; aquarium: commercial
			Doubletooth soldierfish	Myripristis hexagona (Lacepède, 1802)	3.1	Fisheries: minor commercial
			Pinecone soldierfish	Myripristis murdjan (Forsskål, 1775)	3.4	Fisheries: minor commercial; aquarium: commercial
			Japanese soldierfish	Ostichthys japonicus (Cuvier, 1829)	4	Fisheries: commercial
			Deepwater soldierfish	Ostichthys kaianus (Günther, 1880)	4	Fisheries: commercial
			Silverspot squirrelfish	Sargocentron caudimaculatum (Rüppell, 1838)	3.9	Fisheries: minor commercial; aquarium: commercial
C270	Stingrays nei	Atlantic, Eastern Central	Common stingray	Dasyatis pastinaca (Linnaeus, 1758)	4.1	Fisheries: commercial; gamefish: yes	3.75
			Daisy stingray	Fontitrygon margarita (Günther, 1870)	3.4	Fisheries: commercial
C271	Stingrays, butterfly rays nei	Atlantic, Eastern Central	Common stingray	Dasyatis pastinaca (Linnaeus, 1758)	4.1	Fisheries: commercial; gamefish: yes	3.9
			Daisy stingray	Fontitrygon margarita (Günther, 1870)	3.4	Fisheries: commercial
			Spiny butterfly ray	Gymnura altavela (Linnaeus, 1758)	4.5	Fisheries: minor commercial; gamefish: yes
			Smooth butterfly ray	Gymnura micrura (Bloch & Schneider, 1801)	3.6	Fisheries: minor commercial
C272	Stingrays, butterfly rays nei	Indian Ocean, Eastern, Pacific, Western Central	Australian butterfly ray	Gymnura australis (Ramsay & Ogilby, 1886)	3.9	Fisheries: minor commercial	3.9
			Zonetail butterfly ray	Gymnura zonura (Bleeker, 1852)	3.9	Fisheries: commercial
C273	Stolephorus anchovies nei	Pacific, Western Central, Northwest	Commerson's anchovy	Stolephorus commersonnii Lacepède, 1803	3.1	Fisheries: commercial	3.275
			Japanese anchovy	Engraulis japonicus Temminck & Schlegel, 1846	3.1	Fisheries: highly commercial; aquaculture: commercial; bait: usually
			Indian anchovy	Stolephorus indicus (van Hasselt, 1823)	3.6	Fisheries: minor commercial; bait: occasionally
			Spotty-face anchovy	Stolephorus waitei Jordan & Seale, 1926	3.3	Fisheries: commercial
C274	Stolephorus anchovies nei	Indian Ocean, Eastern	Commerson's anchovy	Stolephorus commersonnii Lacepède, 1803	3.1	Fisheries: commercial	3.33333
			Indian anchovy	Stolephorus indicus (van Hasselt, 1823)	3.6	Fisheries: minor commercial; bait: occasionally
			Spotty-face anchovy	Stolephorus waitei Jordan & Seale, 1926	3.3	Fisheries: commercial
C275	Stolephorus anchovies nei	Indian Ocean, Western	Commerson's anchovy	Stolephorus commersonnii Lacepède, 1803	3.1	Fisheries: commercial	3.35
			Indian anchovy	Stolephorus indicus (van Hasselt, 1823)	3.6	Fisheries: minor commercial; bait: occasionally
C276	Sturgeons nei	Asia, Europe - Inland waters	Siberian sturgeon	Acipenser baerii Brandt, 1869	3.3	Fisheries: highly commercial; aquaculture: commercial; aquarium: public aquariums	2.93333
			Yangtze sturgeon	Acipenser dabryanus Duméril, 1869	2	Fisheries: commercial
			Sturgeon	Acipenser sturio Linnaeus, 1758	3.5	Fisheries: commercial; aquaculture: commercial
C277	Surgeonfishes nei	Pacific, Eastern Central	Convict surgeonfish	Acanthurus triostegus (Linnaeus, 1758)	2.8	Fisheries: commercial; aquarium: commercial	2.85
			Yellowfin surgeonfish	Acanthurus xanthopterus Valenciennes, 1835	2.9	Fisheries: minor commercial; aquarium: commercial
C278	Surgeonfishes nei	Pacific, Western Central	Orange-socket surgeonfish	Acanthurus auranticavus Randall, 1956	2	Fisheries: commercial	2.35
			White-freckled surgeonfish	Acanthurus maculiceps (Ahl, 1923)	2	Fisheries: commercial; aquarium: commercial
			Elongate surgeonfish	Acanthurus mata (Cuvier, 1829)	2.5	Fisheries: commercial; aquarium: commercial
			Epaulette surgeonfish	Acanthurus nigricauda Duncker & Mohr, 1929	3	Fisheries: commercial; aquarium: commercial
			Brown surgeonfish	Acanthurus nigrofuscus (Forsskål, 1775)	2	Fisheries: commercial; aquarium: commercial
			Orangespot surgeonfish	Acanthurus olivaceus Bloch & Schneider, 1801	2.3	Fisheries: commercial; aquarium: commercial
			Doubleband surgeonfish	Acanthurus tennentii Günther, 1861	2	Fisheries: commercial; aquarium: commercial
			Convict surgeonfish	Acanthurus triostegus (Linnaeus, 1758)	2.8	Fisheries: commercial; aquarium: commercial
			Yellowfin surgeonfish	Acanthurus xanthopterus Valenciennes, 1835	2.9	Fisheries: minor commercial; aquarium: commercial
			Striated surgeonfish	Ctenochaetus striatus (Quoy & Gaimard, 1825)	2	Fisheries: commercial; aquarium: commercial
C279	Surgeonfishes nei	Indian Ocean, Western	Orange-socket surgeonfish	Acanthurus auranticavus Randall, 1956	2	Fisheries: commercial	2.4
			Elongate surgeonfish	Acanthurus mata (Cuvier, 1829)	2.5	Fisheries: commercial; aquarium: commercial
			Epaulette surgeonfish	Acanthurus nigricauda Duncker & Mohr, 1929	3	Fisheries: commercial; aquarium: commercial
			Brown surgeonfish	Acanthurus nigrofuscus (Forsskål, 1775)	2	Fisheries: commercial; aquarium: commercial
			Doubleband surgeonfish	Acanthurus tennentii Günther, 1861	2	Fisheries: commercial; aquarium: commercial
			Convict surgeonfish	Acanthurus triostegus (Linnaeus, 1758)	2.8	Fisheries: commercial; aquarium: commercial
			Yellowfin surgeonfish	Acanthurus xanthopterus Valenciennes, 1835	2.9	Fisheries: minor commercial; aquarium: commercial
			Striated surgeonfish	Ctenochaetus striatus (Quoy & Gaimard, 1825)	2	Fisheries: commercial; aquarium: commercial
C280	Sweetlips, rubberlips nei	Indo-Pacific, Western Central	Painted sweetlips	Diagramma pictum (Thunberg, 1792)	3.7	Fisheries: commercial; gamefish: yes; aquarium: commercial	3.8
			Trout sweetlips	Plectorhinchus pictus (Tortonese, 1936)	3.9	Fisheries: commercial; aquarium: commercial
C281	Terapon perches nei	Indo-Pacific, Western Central	Largescaled terapon	Terapon theraps Cuvier, 1829	3.5	Fisheries: minor commercial	3.55
			Fourlined terapon	Pelates quadrilineatus (Bloch, 1790)	3.6	Fisheries: minor commercial
C282	Threadfin and dwarf breams nei	Indian Ocean, Western	Delagoa threadfin bream	Nemipterus bipunctatus (Valenciennes, 1830)	3.9	Fisheries: minor commercial	3.8
			Japanese threadfin bream	Nemipterus japonicus (Bloch, 1791)	4.1	Fisheries: commercial
			Notchedfin threadfin bream	Nemipterus peronii (Valenciennes, 1830)	3.7	Fisheries: commercial
			Slender threadfin bream	Nemipterus zysron (Bleeker, 1856)	3.5	Fisheries: minor commercial
C283	Threadfin and dwarf breams nei	Indian Ocean, Eastern, Pacific, Western Central, Northwest	Dwarf threadfin bream	Nemipterus balinensoides (Popta, 1918)	3.7	Fisheries: subsistence fisheries	3.81667
			Yellowbelly threadfin bream	Nemipterus bathybius Snyder, 1911	4	Fisheries: commercial
			Delagoa threadfin bream	Nemipterus bipunctatus (Valenciennes, 1830)	3.9	Fisheries: minor commercial
			Fork-tailed threadfin bream	Nemipterus furcosus (Valenciennes, 1830)	3.7	Fisheries: commercial
			Ornate threadfin bream	Nemipterus hexodon (Quoy & Gaimard, 1824)	3.9	Fisheries: minor commercial
			Teardrop threadfin bream	Nemipterus isacanthus (Bleeker, 1873)	3.8	Fisheries: minor commercial
			Japanese threadfin bream	Nemipterus japonicus (Bloch, 1791)	4.1	Fisheries: commercial
			Mauvelip threadfin bream	Nemipterus mesoprion (Bleeker, 1853)	3.7	Fisheries: minor commercial
			Doublewhip threadfin bream	Nemipterus nematophorus (Bleeker, 1854)	3.8	Fisheries: minor commercial
			Notchedfin threadfin bream	Nemipterus peronii (Valenciennes, 1830)	3.7	Fisheries: commercial
			Fivelined threadfin bream	Nemipterus tambuloides (Bleeker, 1853)	4	Fisheries: commercial
			Slender threadfin bream	Nemipterus zysron (Bleeker, 1856)	3.5	Fisheries: minor commercial
C284	Threadfins, tasselfishes nei	Atlantic, Eastern Central, Southeast	African pompano	Alectis ciliaris (Bloch, 1787)	4	Fisheries: minor commercial; gamefish: yes; aquarium: commercial	3.8
			Lesser African threadfin	Galeoides decadactylus (Bloch, 1795)	3.6	Fisheries: commercial
			Royal threadfin	Pentanemus quinquarius (Linnaeus, 1758)	3.6	Fisheries: highly commercial
			Giant African threadfin	Polydactylus quadrifilis (Cuvier, 1829)	4	Fisheries: commercial; gamefish: yes
C285	Threadfins, tasselfishes nei	Indian Ocean, Eastern	Sixfinger threadfin	Polydactylus sexfilis (Valenciennes, 1831)	3.4	Fisheries: commercial; aquaculture: experimental; gamefish: yes; aquarium: commercial	3.8
			Blackspot threadfin	Polydactylus sextarius (Bloch & Schneider, 1801)	3.8	Fisheries: commercial; gamefish: yes
			African pompano	Alectis ciliaris (Bloch, 1787)	4	Fisheries: minor commercial; gamefish: yes; aquarium: commercial
			Fourfinger threadfin	Eleutheronema tetradactylum (Shaw, 1804)	4.1	Fisheries: highly commercial; aquaculture: commercial
			Indian threadfin	Leptomelanosoma indicum (Shaw, 1804)	3.9	Fisheries: commercial; gamefish: yes
			Japanese threadfin bream	Nemipterus japonicus (Bloch, 1791)	4.1	Fisheries: commercial
			Striped threadfin	Polydactylus plebeius (Broussonet, 1782)	3.6	Fisheries: commercial
			Sixfinger threadfin	Polydactylus sexfilis (Valenciennes, 1831)	3.4	Fisheries: commercial; aquaculture: experimental; gamefish: yes; aquarium: commercia
			Blackspot threadfin	Polydactylus sextarius (Bloch & Schneider, 1801)	3.8	Fisheries: commercial; gamefish: yes
			Paradise threadfin	Polynemus paradiseus Linnaeus, 1758	3.9	Fisheries: commercial
C286	Threadfins, tasselfishes nei	Pacific, Western Central	Sixfinger threadfin	Polydactylus sexfilis (Valenciennes, 1831)	3.4	Fisheries: commercial; aquaculture: experimental; gamefish: yes; aquarium: commercial	3.77
			Blackspot threadfin	Polydactylus sextarius (Bloch & Schneider, 1801)	3.8	Fisheries: commercial; gamefish: yes
			African pompano	Alectis ciliaris (Bloch, 1787)	4	Fisheries: minor commercial; gamefish: yes; aquarium: commercial
			Fourfinger threadfin	Eleutheronema tetradactylum (Shaw, 1804)	4.1	Fisheries: highly commercial; aquaculture: commercial
			Threefinger threadfin	Eleutheronema tridactylum (Bleeker, 1849)	3.6	Fisheries: minor commercial
			Indian threadfin	Leptomelanosoma indicum (Shaw, 1804)	3.9	Fisheries: commercial; gamefish: yes
			Japanese threadfin bream	Nemipterus japonicus (Bloch, 1791)	4.1	Fisheries: commercial
			Striped threadfin	Polydactylus plebeius (Broussonet, 1782)	3.6	Fisheries: commercial
			Sixfinger threadfin	Polydactylus sexfilis (Valenciennes, 1831)	3.4	Fisheries: commercial; aquaculture: experimental; gamefish: yes; aquarium: commercia
			Blackspot threadfin	Polydactylus sextarius (Bloch & Schneider, 1801)	3.8	Fisheries: commercial; gamefish: yes
C287	Threadfins, tasselfishes nei	Asia - Inland waters	Eastern paradise fish	Polynemus dubius Bleeker, 1853	3.7	/	3.8
			African pompano	Alectis ciliaris (Bloch, 1787)	4	Fisheries: minor commercial; gamefish: yes; aquarium: commercial
			Fourfinger threadfin	Eleutheronema tetradactylum (Shaw, 1804)	4.1	Fisheries: highly commercial; aquaculture: commercial
			Sixfinger threadfin	Polydactylus sexfilis (Valenciennes, 1831)	3.4	Fisheries: commercial; aquaculture: experimental; gamefish: yes; aquarium: commercia
C288	Threadfins, tasselfishes nei	Indian Ocean, Western	Sixfinger threadfin	Polydactylus sexfilis (Valenciennes, 1831)	3.4	Fisheries: commercial; aquaculture: experimental; gamefish: yes; aquarium: commercial	3.76667
			African pompano	Alectis ciliaris (Bloch, 1787)	4	Fisheries: minor commercial; gamefish: yes; aquarium: commercial
			Fourfinger threadfin	Eleutheronema tetradactylum (Shaw, 1804)	4.1	Fisheries: highly commercial; aquaculture: commercial
			Japanese threadfin bream	Nemipterus japonicus (Bloch, 1791)	4.1	Fisheries: commercial
			Striped threadfin	Polydactylus plebeius (Broussonet, 1782)	3.6	Fisheries: commercial
			Sixfinger threadfin	Polydactylus sexfilis (Valenciennes, 1831)	3.4	Fisheries: commercial; aquaculture: experimental; gamefish: yes; aquarium: commercia
C289	Tilapias nei	Africa - Inland waters, Atlantic, Eastern Central	Redbreast tilapia	Coptodon rendalli (Boulenger, 1897)	2.3	Fisheries: commercial; aquaculture: commercial; gamefish: yes; aquarium: commercial	2.1375
			Redbelly tilapia	Coptodon zillii (Gervais, 1848)	2.5	Fisheries: commercial; aquaculture: commercial; aquarium: commercial
			Blue tilapia	Oreochromis aureus (Steindachner, 1864)	2.1	Fisheries: highly commercial; aquaculture: commercial; aquarium: commercial; bait: usually
			Karonga tilapia	Oreochromis karongae (Trewavas, 1941)	2	Fisheries: commercial
			Mozambique tilapia	Oreochromis mossambicus (Peters, 1852)	2.2	Fisheries: highly commercial; aquaculture: commercial; gamefish: yes; aquarium: commercial
			Nile tilapia	Oreochromis niloticus (Linnaeus, 1758)	2	Fisheries: highly commercial; aquaculture: commercial
			Wami tilapia	Oreochromis urolepis (Norman, 1922)	2	Fisheries: commercial; aquaculture: commercial; aquarium: commercial
			Mango tilapia	Sarotherodon galilaeus (Linnaeus, 1758)	2	Fisheries: commercial; aquaculture: commercial; aquarium: commercial
C290	Tilapias nei	America, South - Inland waters	Redbreast tilapia	Coptodon rendalli (Boulenger, 1897)	2.3	Fisheries: commercial; aquaculture: commercial; gamefish: yes; aquarium: commercial	2.1
			Blue tilapia	Oreochromis aureus (Steindachner, 1864)	2.1	Fisheries: highly commercial; aquaculture: commercial; aquarium: commercial; bait: usually
			Mozambique tilapia	Oreochromis mossambicus (Peters, 1852)	2.2	Fisheries: highly commercial; aquaculture: commercial; gamefish: yes; aquarium: commercial
			Nile tilapia	Oreochromis niloticus (Linnaeus, 1758)	2	Fisheries: highly commercial; aquaculture: commercial
			Wami tilapia	Oreochromis urolepis (Norman, 1922)	2	Fisheries: commercial; aquaculture: commercial; aquarium: commercial
			Mango tilapia	Sarotherodon galilaeus (Linnaeus, 1758)	2	Fisheries: commercial; aquaculture: commercial; aquarium: commercial
C291	Tilapias nei	America, North - Inland waters	Redbreast tilapia	Coptodon rendalli (Boulenger, 1897)	2.3	Fisheries: commercial; aquaculture: commercial; gamefish: yes; aquarium: commercial	2.15714
			Redbelly tilapia	Coptodon zillii (Gervais, 1848)	2.5	Fisheries: commercial; aquaculture: commercial; aquarium: commercial
			Blue tilapia	Oreochromis aureus (Steindachner, 1864)	2.1	Fisheries: highly commercial; aquaculture: commercial; aquarium: commercial; bait: usually
			Mozambique tilapia	Oreochromis mossambicus (Peters, 1852)	2.2	Fisheries: highly commercial; aquaculture: commercial; gamefish: yes; aquarium: commercial
			Nile tilapia	Oreochromis niloticus (Linnaeus, 1758)	2	Fisheries: highly commercial; aquaculture: commercial
			Wami tilapia	Oreochromis urolepis (Norman, 1922)	2	Fisheries: commercial; aquaculture: commercial; aquarium: commercial
			Mango tilapia	Sarotherodon galilaeus (Linnaeus, 1758)	2	Fisheries: commercial; aquaculture: commercial; aquarium: commercial
C292	Tilapias nei	Asia - Inland waters	Redbreast tilapia	Coptodon rendalli (Boulenger, 1897)	2.3	Fisheries: commercial; aquaculture: commercial; gamefish: yes; aquarium: commercial	2.15714
			Redbelly tilapia	Coptodon zillii (Gervais, 1848)	2.5	Fisheries: commercial; aquaculture: commercial; aquarium: commercial
			Blue tilapia	Oreochromis aureus (Steindachner, 1864)	2.1	Fisheries: highly commercial; aquaculture: commercial; aquarium: commercial; bait: usually
			Mozambique tilapia	Oreochromis mossambicus (Peters, 1852)	2.2	Fisheries: highly commercial; aquaculture: commercial; gamefish: yes; aquarium: commercial
			Nile tilapia	Oreochromis niloticus (Linnaeus, 1758)	2	Fisheries: highly commercial; aquaculture: commercial
			Wami tilapia	Oreochromis urolepis (Norman, 1922)	2	Fisheries: commercial; aquaculture: commercial; aquarium: commercial
			Mango tilapia	Sarotherodon galilaeus (Linnaeus, 1758)	2	Fisheries: commercial; aquaculture: commercial; aquarium: commercial
C293	Tilefishes nei	Atlantic, Southwest	Great northern tilefish	Lopholatilus chamaeleonticeps Goode & Bean, 1879	3.9	Fisheries: commercial; gamefish: yes	3.74
			Sand tilefish	Malacanthus plumieri (Bloch, 1786)	3.7	Fisheries: minor commercial
			Atlantic goldeneye tilefish	Caulolatilus chrysops (Valenciennes, 1833)	3.6	Fisheries: commercial; gamefish: yes; aquarium: commercial
			Reticulated tilefish	Caulolatilus guppyi Beebe & Tee-Van, 1937	3.7	Fisheries: minor commercial
			Gulf bareye tilefish	Caulolatilus intermedius Howell Rivero, 1936	3.8	Fisheries: minor commercial
C294	Tilefishes nei	Atlantic, Northwest, Western Central	Great northern tilefish	Lopholatilus chamaeleonticeps Goode & Bean, 1879	3.9	Fisheries: commercial; gamefish: yes	3.8
			Sand tilefish	Malacanthus plumieri (Bloch, 1786)	3.7	Fisheries: minor commercial
			Atlantic goldeneye tilefish	Caulolatilus chrysops (Valenciennes, 1833)	3.6	Fisheries: commercial; gamefish: yes; aquarium: commercial
			Blackline tilefish	Caulolatilus cyanops Poey, 1866	4	Fisheries: commercial; gamefish: yes
			Gulf bareye tilefish	Caulolatilus intermedius Howell Rivero, 1936	3.8	Fisheries: minor commercial
			Grey tilefish	Caulolatilus microps Goode & Bean, 1878	3.8	Fisheries: minor commercial; gamefish: yes
C295	Tonguefishes	Atlantic, Eastern Central, Southeast	Nigerian tonguesole	Cynoglossus browni Chabanaud, 1949	3.4	Fisheries: commercial	3.5125
			Ghanian tonguesole	Cynoglossus cadenati Chabanaud, 1947	3.4	Fisheries: commercial
			Canary tonguesole	Cynoglossus canariensis Steindachner, 1882	3.6	Fisheries: commercial
			Guinean tonguesole	Cynoglossus monodi Chabanaud, 1949	3.6	Fisheries: commercial
			Senegalese tonguesole	Cynoglossus senegalensis (Kaup, 1858)	3.6	Fisheries: commercial
			Elongate tonguesole	Symphurus ligulatus (Cocco, 1844)	3.5	Fisheries: commercial
			Tonguesole	Symphurus nigrescens Rafinesque, 1810	3.5	Fisheries: commercial
			Norman's tonguesole	Symphurus normani Chabanaud, 1950	3.5	Fisheries: commercial
C296	Tonguefishes	Pacific, Northwest	Largescale tonguesole	Cynoglossus arel (Bloch & Schneider, 1801)	3.5	Fisheries: commercial	3.42857
			Fourlined tonguesole	Cynoglossus bilineatus (Lacepède, 1802)	3.5	Fisheries: commercial
			Bengal tongue sole	Cynoglossus cynoglossus (Hamilton, 1822)	3.5	Fisheries: commercial
			Roughscale tonguesole	Cynoglossus lida (Bleeker, 1851)	3.2	Fisheries: minor commercial
			Long tongue sole	Cynoglossus lingua Hamilton, 1822	3.5	Fisheries: commercial
			Speckled tonguesole	Cynoglossus puncticeps (Richardson, 1846)	3.3	Fisheries: commercial
			Doublelined tonguesole	Paraplagusia bilineata (Bloch, 1787)	3.5	Fisheries: minor commercial
C297	Tonguefishes	Indian Ocean, Western	Largescale tonguesole	Cynoglossus arel (Bloch & Schneider, 1801)	3.5	Fisheries: commercial	3.42857
			Fourlined tonguesole	Cynoglossus bilineatus (Lacepède, 1802)	3.5	Fisheries: commercial
			Bengal tongue sole	Cynoglossus cynoglossus (Hamilton, 1822)	3.5	Fisheries: commercial
			Roughscale tonguesole	Cynoglossus lida (Bleeker, 1851)	3.2	Fisheries: minor commercial
			Long tongue sole	Cynoglossus lingua Hamilton, 1822	3.5	Fisheries: commercial
			Speckled tonguesole	Cynoglossus puncticeps (Richardson, 1846)	3.3	Fisheries: commercial
			Doublelined tonguesole	Paraplagusia bilineata (Bloch, 1787)	3.5	Fisheries: minor commercial
C298	Tonguefishes	Pacific, Eastern Central	California tonguefish	Symphurus atricauda (Jordan & Gilbert, 1880)	3.4	Fisheries: minor commercial	3.36667
[truncated: 555 more rows]

## Sheet: Aqua-species group
Code	ASFIS species (Name)	Common name	Latin name	Trophic level	Human uses and comment	Mean trophic level
A1	[Brycon spp]	/	Brycon amazonicus (Spix & Agassiz, 1829)	3	/	2.33333
		/	Brycon cephalus (Günther, 1869)	2	Fisheries: minor commercial
		/	Brycon hilarii (Valenciennes, 1850)	2	/
A2	[Carassius spp]	Crucian carp	Carassius carassius (Linnaeus, 1758)	3.1	Fisheries: highly commercial; aquaculture: commercial; gamefish: yes; aquarium: commercial; bait: occasionally	2.53333
		Goldfish	Carassius auratus (Linnaeus, 1758)	2	Fisheries: commercial; aquaculture: commercial; gamefish: yes; aquarium: highly commercial; bait: occasionally
		Prussian carp	Carassius gibelio (Bloch, 1782)	2.5	Fisheries: minor commercial
A3	[Cichla spp]	/	Cichla monoculus Agassiz, 1831	3.9	Fisheries: minor commercial; aquarium: public aquariums	4.3
		Peacock cichlid	Cichla ocellaris Bloch & Schneider, 1801	4.5	Fisheries: minor commercial; aquaculture: commercial; gamefish: yes; aquarium: commercial
		Speckled pavon	Cichla temensis Humboldt, 1821	4.5	Fisheries: commercial; aquaculture: commercial; gamefish: yes; aquarium: commercial
A4	[Hoplias spp]	/	Hoplias lacerdae Miranda Ribeiro, 1908	4.3	Fisheries: commercial; aquaculture: commercial	4.4
		Trahira	Hoplias malabaricus (Bloch, 1794)	4.5	Fisheries: commercial; aquaculture: commercial; aquarium: public aquariums
A5	[Hypsibarbus spp]	/	Hypsibarbus lagleri Rainboth, 1996	2.8	Fisheries: commercial	2.9
		/	Hypsibarbus wetmorei (Smith, 1931)	3	Fisheries: minor commercial; aquaculture: commercial; aquarium: commercial
A6	Amberjacks nei	Greater amberjack	Seriola dumerili (Risso, 1810)	4.5	Fisheries: minor commercial; aquaculture: commercial; gamefish: yes; aquarium: public aquariums	4.25
		Japanese amberjack	Seriola quinqueradiata Temminck & Schlegel, 1845	4	Fisheries: highly commercial; aquaculture: commercial; gamefish: yes
A7	Asian barbs nei	Swamp barb	Puntius chola (Hamilton, 1822)	2.5	Fisheries: commercial; aquarium: commercial	2.75
		Tinfoil barb	Barbonymus schwanefeldii (Bleeker, 1854)	3	Fisheries: subsistence fisheries; aquaculture: commercial; aquarium: commercial; bait: occasionally
A8	Catfishes nei	Channel catfish	Ictalurus punctatus (Rafinesque, 1818)	4.2	Fisheries: highly commercial; aquaculture: commercial; gamefish: yes; aquarium: commercial	4
		North African catfish	Clarias gariepinus (Burchell, 1822)	3.8	Fisheries: minor commercial; aquaculture: commercial; gamefish: yes
A9	Catfishes nei	Channel catfish	Ictalurus punctatus (Rafinesque, 1818)	4.2	Fisheries: highly commercial; aquaculture: commercial; gamefish: yes; aquarium: commercial	4.05
		South American catfish	Rhamdia quelen (Quoy & Gaimard, 1824)	3.9	Fisheries: minor commercial; aquaculture: commercial
A10	Cichlasoma nei	/	Cichlasoma istlanum (Jordan & Snyder, 1899)	3.4	Fisheries: commercial	3.35
		Brown coscarob	Cichlasoma taenia (Bennett, 1831)	3.3	Fisheries: minor commercial
A11	Citharinus nei	/	Citharinops distichodoides (Pellegrin, 1919)	2	Fisheries: commercial	2.16
		Moon fish	Citharinus citharus (Geoffroy Saint-Hilaire, 1809)	2	Fisheries: commercial; aquarium: commercial
		/	Citharinus eburneensis Daget, 1962	2.4	Fisheries: highly commercial
		/	Citharinus gibbosus Boulenger, 1899	2.2	Fisheries: commercial
		/	Citharinus latus Müller & Troschel, 1844	2.2	Fisheries: commercial
A12	Croakers, drums nei	Large yellow croaker	Larimichthys crocea (Richardson, 1846)	3.7	Fisheries: highly commercial; aquaculture: commercial; aquarium: commercial	3.725
		Red drum	Sciaenops ocellatus (Linnaeus, 1766)	3.7	Fisheries: minor commercial; aquaculture: commercial; gamefish: yes; aquarium: public aquariums
		Blackspotted croaker	Protonibea diacanthus (Lacepède, 1802)	3.5	Fisheries: minor commercial; aquaculture: commercial
		Atlantic croaker	Micropogonias undulatus (Linnaeus, 1766)	4	Fisheries: commercial; aquaculture: experimental; gamefish: yes
A13	Cyprinids nei	Common carp	Cyprinus carpio Linnaeus, 1758	3.1	Fisheries: highly commercial; aquaculture: commercial; gamefish: yes; aquarium: commercial	2.73333
		Goldfish	Carassius auratus (Linnaeus, 1758)	2	Fisheries: commercial; aquaculture: commercial; gamefish: yes; aquarium: highly commercial; bait: occasionally
		Crucian carp	Carassius carassius (Linnaeus, 1758)	3.1	Fisheries: highly commercial; aquaculture: commercial; gamefish: yes; aquarium: commercial; bait: occasionally
A14	Gouramis nei	Giant gourami	Osphronemus goramy Lacepède, 1801	2.8	Fisheries: commercial; aquaculture: commercial; aquarium: commercial	2.8
		Snakeskin gourami	Trichopodus pectoralis Regan, 1910	2.8	Fisheries: commercial; aquaculture: commercial
A15	Groupers nei	Humpback grouper	Cromileptes altivelis (Valenciennes, 1828)	4.5	Fisheries: commercial; aquaculture: commercial; aquarium: commercial	4.05455
		Areolate grouper	Epinephelus areolatus (Forsskål, 1775)	3.7	Fisheries: commercial; aquaculture: commercial
		Duskytail grouper	Epinephelus bleekeri (Vaillant, 1878)	3.9	Fisheries: minor commercial; aquaculture: commercial
		Longtooth grouper	Epinephelus bruneus Bloch, 1793	4	Fisheries: commercial; aquaculture: commercial; gamefish: yes
		Orange-spotted grouper	Epinephelus coioides (Hamilton, 1822)	4	Fisheries: commercial; aquaculture: commercial
		Brown-marbled grouper	Epinephelus fuscoguttatus (Forsskål, 1775)	4.1	Fisheries: minor commercial; aquaculture: commercial; aquarium: commercial
		Giant grouper	Epinephelus lanceolatus (Bloch, 1790)	4	Fisheries: subsistence fisheries; aquaculture: commercial; gamefish: yes; aquarium: commercial
		Malabar grouper	Epinephelus malabaricus (Bloch & Schneider, 1801)	4.2	Fisheries: highly commercial; aquaculture: commercial; gamefish: yes
		Camouflage grouper	Epinephelus polyphekadion (Bleeker, 1849)	4	Fisheries: commercial; aquaculture: experimental
		Greasy grouper	Epinephelus tauvina (Forsskål, 1775)	4.1	Fisheries: minor commercial; aquaculture: commercial; gamefish: yes
		Spotted coralgrouper	Plectropomus maculatus (Bloch, 1790)	4.1	Fisheries: commercial; aquaculture: commercial; gamefish: yes
A16	Groupers nei	White grouper	Epinephelus aeneus (Geoffroy Saint-Hilaire, 1817)	4	Fisheries: commercial; aquaculture: experimental; gamefish: yes	4.06
		Giant grouper	Epinephelus lanceolatus (Bloch, 1790)	4	Fisheries: subsistence fisheries; aquaculture: commercial; gamefish: yes; aquarium: commercial
		Malabar grouper	Epinephelus malabaricus (Bloch & Schneider, 1801)	4.2	Fisheries: highly commercial; aquaculture: commercial; gamefish: yes
		Camouflage grouper	Epinephelus polyphekadion (Bleeker, 1849)	4	Fisheries: commercial; aquaculture: experimental
		Greasy grouper	Epinephelus tauvina (Forsskål, 1775)	4.1	Fisheries: minor commercial; aquaculture: commercial; gamefish: yes
A17	Groupers, seabasses nei	Humpback grouper	Cromileptes altivelis (Valenciennes, 1828)	4.5	Fisheries: commercial; aquaculture: commercial; aquarium: commercial	3.96154
		Areolate grouper	Epinephelus areolatus (Forsskål, 1775)	3.7	Fisheries: commercial; aquaculture: commercial
		Duskytail grouper	Epinephelus bleekeri (Vaillant, 1878)	3.9	Fisheries: minor commercial; aquaculture: commercial
		Longtooth grouper	Epinephelus bruneus Bloch, 1793	4	Fisheries: commercial; aquaculture: commercial; gamefish: yes
		Orange-spotted grouper	Epinephelus coioides (Hamilton, 1822)	4	Fisheries: commercial; aquaculture: commercial
		Brown-marbled grouper	Epinephelus fuscoguttatus (Forsskål, 1775)	4.1	Fisheries: minor commercial; aquaculture: commercial; aquarium: commercial
		Giant grouper	Epinephelus lanceolatus (Bloch, 1790)	4	Fisheries: subsistence fisheries; aquaculture: commercial; gamefish: yes; aquarium: commercial
		Malabar grouper	Epinephelus malabaricus (Bloch & Schneider, 1801)	4.2	Fisheries: highly commercial; aquaculture: commercial; gamefish: yes
		Camouflage grouper	Epinephelus polyphekadion (Bleeker, 1849)	4	Fisheries: commercial; aquaculture: experimental
		Greasy grouper	Epinephelus tauvina (Forsskål, 1775)	4.1	Fisheries: minor commercial; aquaculture: commercial; gamefish: yes
		Spotted coralgrouper	Plectropomus maculatus (Bloch, 1790)	4.1	Fisheries: commercial; aquaculture: commercial; gamefish: yes
		Japanese seabass	Lateolabrax japonicus (Cuvier, 1828)	3.1	Fisheries: commercial; aquaculture: commercial; gamefish: yes
		Barramundi	Lates calcarifer (Bloch, 1790)	3.8	Fisheries: highly commercial; aquaculture: commercial; gamefish: yes; aquarium: public aquariums
A18	Jacks, crevalles nei	Giant trevally	Caranx ignobilis (Forsskål, 1775)	4.2	Fisheries: commercial; aquaculture: commercial; gamefish: yes; aquarium: public aquariums	4.18
		Black jack	Caranx lugubris Poey, 1860	4.5	Fisheries: minor commercial; aquaculture: commercial; gamefish: yes
		Bluefin trevally	Caranx melampygus Cuvier, 1833	4.5	Fisheries: commercial; aquaculture: commercial; gamefish: yes; aquarium: public aquariums
		Golden trevally	Gnathanodon speciosus (Forsskål, 1775)	3.8	Fisheries: minor commercial; aquaculture: commercial; gamefish: yes; aquarium: commercial
		White trevally	Pseudocaranx dentex (Bloch & Schneider, 1801)	3.9	Fisheries: commercial; aquaculture: commercial; gamefish: yes
A19	Jacks, crevalles nei	Bluefin trevally	Caranx melampygus Cuvier, 1833	4.5	Fisheries: commercial; aquaculture: commercial; gamefish: yes; aquarium: public aquariums	4.175
		Black jack	Caranx lugubris Poey, 1860	4.5	Fisheries: minor commercial; aquaculture: commercial; gamefish: yes
		Golden trevally	Gnathanodon speciosus (Forsskål, 1775)	3.8	Fisheries: minor commercial; aquaculture: commercial; gamefish: yes; aquarium: commercial
		White trevally	Pseudocaranx dentex (Bloch & Schneider, 1801)	3.9	Fisheries: commercial; aquaculture: commercial; gamefish: yes
A20	Lefteye flounders nei	Turbot	Scophthalmus maximus (Linnaeus, 1758)	4.4	Fisheries: commercial; aquaculture: commercial; gamefish: yes; aquarium: public aquariums	4.45
		Bastard halibut	Paralichthys olivaceus (Temminck & Schlegel, 1846)	4.5	Fisheries: highly commercial; aquaculture: commercial
A21	Mullets nei	Flathead grey mullet	Mugil cephalus Linnaeus, 1758	2.5	Fisheries: highly commercial; aquaculture: commercial; gamefish: yes; bait: occasionally	2.25
		White mullet	Mugil curema Valenciennes, 1836	2	Fisheries: commercial; aquaculture: commercial; bait: occasionally
A22	Mullets nei	Fringelip mullet	Crenimugil crenilabis (Forsskål, 1775)	2.3	Fisheries: minor commercial; aquaculture: commercial; bait: occasionally	2.25
		Squaretail mullet	Ellochelon vaigiensis (Quoy & Gaimard, 1825)	2.2	Fisheries: commercial; aquaculture: commercial; aquarium: commercial; bait: occasionally
		Flathead grey mullet	Mugil cephalus Linnaeus, 1758	2.5	Fisheries: highly commercial; aquaculture: commercial; gamefish: yes; bait: occasionally
		White mullet	Mugil curema Valenciennes, 1836	2	Fisheries: commercial; aquaculture: commercial; bait: occasionally
A23	Mullets nei	Fringelip mullet	Crenimugil crenilabis (Forsskål, 1775)	2.3	Fisheries: minor commercial; aquaculture: commercial; bait: occasionally	2.38333
		Squaretail mullet	Ellochelon vaigiensis (Quoy & Gaimard, 1825)	2.2	Fisheries: commercial; aquaculture: commercial; aquarium: commercial; bait: occasionally
		Flathead grey mullet	Mugil cephalus Linnaeus, 1758	2.5	Fisheries: highly commercial; aquaculture: commercial; gamefish: yes; bait: occasionally
		Largescale mullet	Planiliza macrolepis (Smith, 1846)	2.6	Fisheries: commercial; aquaculture: commercial; gamefish: yes
		Tade gray mullet	Planiliza planiceps (Valenciennes, 1836)	2	Fisheries: commercial; aquaculture: commercial
		Greenback mullet	Planiliza subviridis (Valenciennes, 1836)	2.7	Fisheries: commercial; aquaculture: commercial; bait: usually
A24	Mullets nei	White mullet	Mugil curema Valenciennes, 1836	2	Fisheries: commercial; aquaculture: commercial; bait: occasionally	2
		Lebranche mullet	Mugil liza Valenciennes, 1836	2	Fisheries: commercial; aquaculture: commercial
A25	Porgies, seabreams nei	Red seabream	Pagrus major (Temminck & Schlegel, 1843)	4.5	Fisheries: highly commercial; aquaculture: commercial; gamefish: yes; aquarium: public aquariums	3.8
		Goldlined seabream	Rhabdosargus sarba (Forsskål, 1775)	3.3	Fisheries: commercial; aquaculture: commercial; gamefish: yes
		Silver seabream	Pagrus auratus (Forster, 1801)	3.6	Fisheries: commercial; aquaculture: experimental; gamefish: yes
		Yellowfin seabream	Acanthopagrus latus (Houttuyn, 1782)	3.8	Aquaculture: commercial
A26	Porgies, seabreams nei	Gilthead seabream	Sparus aurata Linnaeus, 1758	3.7	Fisheries: commercial; aquaculture: commercial; gamefish: yes	4.03333
		Common dentex	Dentex dentex (Linnaeus, 1758)	4.5	Fisheries: commercial; aquaculture: commercial; gamefish: yes
		Red porgy	Pagrus pagrus (Linnaeus, 1758)	3.9	Fisheries: commercial; aquaculture: commercial; gamefish: yes; aquarium: public aquariums
A27	Prochilods nei	Streaked prochilod	Prochilodus lineatus (Valenciennes, 1837)	2.2	Fisheries: commercial; aquaculture: commercial; aquarium: commercial	2.15
		Netted prochilod	Prochilodus reticulatus Valenciennes, 1850	2	Fisheries: commercial; aquaculture: commercial
		Black prochilodus	Prochilodus nigricans Spix & Agassiz, 1829	2.4	Fisheries: commercial; aquaculture: commercial; aquarium: commercial
		Netted prochilod	Prochilodus reticulatus Valenciennes, 1850	2	Fisheries: commercial; aquaculture: commercial
A28	River eels nei	European eel	Anguilla anguilla (Linnaeus, 1758)	3.6	Fisheries: commercial; aquaculture: commercial; gamefish: yes	3.7
		Giant mottled eel	Anguilla marmorata Quoy & Gaimard, 1824	3.8	Fisheries: commercial; aquaculture: commercial; gamefish: yes
A29	River eels nei	Giant mottled eel	Anguilla marmorata Quoy & Gaimard, 1824	3.8	Fisheries: commercial; aquaculture: commercial; gamefish: yes	3.8
A30	Salmonids nei	Arctic char	Salvelinus alpinus (Linnaeus, 1758)	4.4	Fisheries: minor commercial; aquaculture: commercial; gamefish: yes	3.9
		Brook trout	Salvelinus fontinalis (Mitchill, 1814)	3.3	Fisheries: minor commercial; aquaculture: commercial; gamefish: yes; aquarium: public aquariums
		Cutthroat trout	Oncorhynchus clarkii (Richardson, 1836)	3.8	Fisheries: commercial; aquaculture: commercial; gamefish: yes; aquarium: public aquariums
		Brook trout	Salvelinus fontinalis (Mitchill, 1814)	3.3	Fisheries: minor commercial; aquaculture: commercial; gamefish: yes; aquarium: public aquariums
		Cutthroat trout	Oncorhynchus clarkii (Richardson, 1836)	3.8	Fisheries: commercial; aquaculture: commercial; gamefish: yes; aquarium: public aquariums
		Pink salmon	Oncorhynchus gorbuscha (Walbaum, 1792)	4.5	Fisheries: highly commercial; aquaculture: commercial; gamefish: yes
		Chum salmon	Oncorhynchus keta (Walbaum, 1792)	3.7	Fisheries: highly commercial; aquaculture: commercial; gamefish: yes; aquarium: public aquariums
		Sockeye salmon	Oncorhynchus nerka (Walbaum, 1792)	3.5	Fisheries: highly commercial; aquaculture: commercial; gamefish: yes; aquarium: public aquariums
		Chinook salmon	Oncorhynchus tshawytscha (Walbaum, 1792)	4.4	Fisheries: highly commercial; aquaculture: commercial; gamefish: yes; aquarium: public aquariums
		Coho salmon	Oncorhynchus kisutch (Walbaum, 1792)	4.2	Fisheries: highly commercial; aquaculture: commercial; gamefish: yes
		Sea trout	Salmo trutta Linnaeus, 1758	3.4	Fisheries: commercial; aquaculture: commercial; gamefish: yes
		Atlantic salmon	Salmo salar Linnaeus, 1758	4.5	Fisheries: highly commercial; aquaculture: commercial; gamefish: yes
A31	Salmonoids nei, Salmonids nei	Sea trout	Salmo trutta Linnaeus, 1758	3.4	Fisheries: commercial; aquaculture: commercial; gamefish: yes	3.96667
		Ohrid trout	Salmo letnica (Karaman, 1924)	4	Fisheries: commercial; aquaculture: commercial; gamefish: yes
		/	Salmo marmoratus Cuvier, 1829	4	Fisheries: commercial; aquaculture: commercial; gamefish: yes
		/	Salmo carpio Linnaeus, 1758	3.5	Fisheries: commercial; aquaculture: commercial
		Atlantic salmon	Salmo salar Linnaeus, 1758	4.5	Fisheries: highly commercial; aquaculture: commercial; gamefish: yes
		Chinook salmon	Oncorhynchus tshawytscha (Walbaum, 1792)	4.4	Fisheries: highly commercial; aquaculture: commercial; gamefish: yes; aquarium: public aquariums
A32	Sargo breams nei	White seabream	Diplodus sargus (Linnaeus, 1758)	3.4	Fisheries: minor commercial; aquaculture: commercial; gamefish: yes	3.65
		Red porgy	Pagrus pagrus (Linnaeus, 1758)	3.9	Fisheries: commercial; aquaculture: commercial; gamefish: yes; aquarium: public aquariums
A33	Silver, bighead carps nei	Silver carp	Hypophthalmichthys molitrix (Valenciennes, 1844)	2	Fisheries: commercial; aquaculture: commercial	2.4
		Bighead carp	Hypophthalmichthys nobilis (Richardson, 1845)	2.8	Fisheries: highly commercial; aquaculture: commercial; aquarium: public aquariums
A34	Snappers nei	Mangrove red snapper	Lutjanus argentimaculatus (Forsskål, 1775)	3.6	Fisheries: commercial; aquaculture: commercial; gamefish: yes	4.1125
		Crimson snapper	Lutjanus erythropterus Bloch, 1790	4.5	Fisheries: commercial; aquaculture: commercial
		John's snapper	Lutjanus johnii (Bloch, 1792)	4.2	Fisheries: commercial; aquaculture: commercial; gamefish: yes
		One-spot snapper	Lutjanus monostigma (Cuvier, 1828)	4.3	Fisheries: commercial; aquaculture: commercial
		Blubberlip snapper	Lutjanus rivulatus (Cuvier, 1828)	4.1	Fisheries: commercial; aquaculture: commercial; gamefish: yes
		Russell's snapper	Lutjanus russellii (Bleeker, 1849)	4.1	Fisheries: commercial; aquaculture: commercial
		Emperor red snapper	Lutjanus sebae (Cuvier, 1816)	4.1	Fisheries: commercial; aquaculture: commercial; gamefish: yes; aquarium: commercial
		Star snapper	Lutjanus stellatus Akazaki, 1983	4	Fisheries: commercial; aquaculture: commercial
A35	Snappers, jobfishes nei	Crimson jobfish	Pristipomoides filamentosus (Valenciennes, 1830)	4.2	Fisheries: highly commercial; gamefish: yes	3.9
		Golden eye jobfish	Pristipomoides flavipinnis Shinohara, 1963	3.6	Fisheries: highly commercial
A36	Spinefeet(=Rabbitfishes) nei	White-spotted spinefoot	Siganus canaliculatus (Park, 1797)	2.8	Fisheries: commercial; aquaculture: commercial	2.3
		Mottled spinefoot	Siganus fuscescens (Houttuyn, 1782)	2	Fisheries: commercial; aquaculture: commercial
		Orange-spotted spinefoot	Siganus guttatus (Bloch, 1787)	2.7	Fisheries: commercial; aquaculture: commercial; aquarium: commercial
		Marbled spinefoot	Siganus rivulatus Forsskål & Niebuhr, 1775	2	Fisheries: minor commercial; aquaculture: commercial
		Marbled spinefoot	Siganus rivulatus Forsskål & Niebuhr, 1775	2	Fisheries: minor commercial; aquaculture: commercial
A37	Sturgeons nei	Siberian sturgeon	Acipenser baerii Brandt, 1869	3.3	Fisheries: highly commercial; aquaculture: commercial; aquarium: public aquariums	3.48182
		Sturgeon	Acipenser sturio Linnaeus, 1758	3.5	Fisheries: commercial; aquaculture: commercial
		Lake sturgeon	Acipenser fulvescens Rafinesque, 1817	3.3	Fisheries: commercial; aquaculture: experimental; gamefish: yes; aquarium: public aquariums
		White sturgeon	Acipenser transmontanus Richardson, 1836	3.3	Fisheries: commercial; aquaculture: commercial; gamefish: yes
		Danube sturgeon	Acipenser gueldenstaedtii Brandt & Ratzeburg, 1833	3.3	Fisheries: commercial; aquaculture: commercial; aquarium: public aquariums
		Sakhalin sturgeon	Acipenser mikadoi Hilgendorf, 1892	3.3	Fisheries: minor commercial; aquaculture: commercial
		Fringebarbel sturgeon	Acipenser nudiventris Lovetsky, 1828	3.3	Fisheries: commercial; aquaculture: commercial
		Sterlet sturgeon	Acipenser ruthenus Linnaeus, 1758	3.6	Fisheries: commercial; aquaculture: commercial; aquarium: public aquariums
		Starry sturgeon	Acipenser stellatus Pallas, 1771	3.5	Fisheries: commercial; aquaculture: commercial; aquarium: public aquariums
		Sturgeon	Acipenser sturio Linnaeus, 1758	3.5	Fisheries: commercial; aquaculture: commercial
		Beluga	Huso huso (Linnaeus, 1758)	4.4	Fisheries: commercial; aquaculture: commercial
A38	Tilapias nei	Redbreast tilapia	Coptodon rendalli (Boulenger, 1897)	2.3	Fisheries: commercial; aquaculture: commercial; gamefish: yes; aquarium: commercial	2.15714
		Redbelly tilapia	Coptodon zillii (Gervais, 1848)	2.5	Fisheries: commercial; aquaculture: commercial; aquarium: commercial
		Blue tilapia	Oreochromis aureus (Steindachner, 1864)	2.1	Fisheries: highly commercial; aquaculture: commercial; aquarium: commercial; bait: usually
		Mozambique tilapia	Oreochromis mossambicus (Peters, 1852)	2.2	Fisheries: highly commercial; aquaculture: commercial; gamefish: yes; aquarium: commercial
		Nile tilapia	Oreochromis niloticus (Linnaeus, 1758)	2	Fisheries: highly commercial; aquaculture: commercial
		Wami tilapia	Oreochromis urolepis (Norman, 1922)	2	Fisheries: commercial; aquaculture: commercial; aquarium: commercial
		Mango tilapia	Sarotherodon galilaeus (Linnaeus, 1758)	2	Fisheries: commercial; aquaculture: commercial; aquarium: commercial
A39	Tilapias nei	Redbelly tilapia	Coptodon zillii (Gervais, 1848)	2.5	Fisheries: commercial; aquaculture: commercial; aquarium: commercial	2.35
		Mozambique tilapia	Oreochromis mossambicus (Peters, 1852)	2.2	Fisheries: highly commercial; aquaculture: commercial; gamefish: yes; aquarium: commercial
A40	Torpedo-shaped catfishes nei	Bagrid catfish	Chrysichthys nigrodigitatus (Lacepède, 1803)	3.2	Fisheries: minor commercial; aquaculture: commercial; gamefish: yes	3.525
		Mudfish	Clarias anguillaris (Linnaeus, 1758)	3.4	Fisheries: minor commercial; aquaculture: commercial
		North African catfish	Clarias gariepinus (Burchell, 1822)	3.8	Fisheries: minor commercial; aquaculture: commercial; gamefish: yes
		Sampa	Heterobranchus longifilis Valenciennes, 1840	3.7	Fisheries: minor commercial; aquaculture: commercial; gamefish: yes
A41	Torpedo-shaped catfishes nei	Bighead catfish	Clarias macrocephalus Günther, 1864	3.7	Fisheries: commercial; aquaculture: commercial	3.95
		Channel catfish	Ictalurus punctatus (Rafinesque, 1818)	4.2	Fisheries: highly commercial; aquaculture: commercial; gamefish: yes; aquarium: commercial
A42	Trouts nei	Sea trout	Salmo trutta Linnaeus, 1758	3.4	Fisheries: commercial; aquaculture: commercial; gamefish: yes	3.78
		Rainbow trout	Oncorhynchus mykiss (Walbaum, 1792)	4.1	Fisheries: highly commercial; aquaculture: commercial; gamefish: yes
		Brook trout	Salvelinus fontinalis (Mitchill, 1814)	3.3	Fisheries: minor commercial; aquaculture: commercial; gamefish: yes; aquarium: public aquariums
		Cutthroat trout	Oncorhynchus clarkii (Richardson, 1836)	3.8	Fisheries: commercial; aquaculture: commercial; gamefish: yes; aquarium: public aquariums
		Lake trout	Salvelinus namaycush (Walbaum, 1792)	4.3	Fisheries: commercial; aquaculture: commercial; gamefish: yes
A43	Trouts nei	Sea trout	Salmo trutta Linnaeus, 1758	3.4	Fisheries: commercial; aquaculture: commercial; gamefish: yes	3.8
		Rainbow trout	Oncorhynchus mykiss (Walbaum, 1792)	4.1	Fisheries: highly commercial; aquaculture: commercial; gamefish: yes
		Brook trout	Salvelinus fontinalis (Mitchill, 1814)	3.3	Fisheries: minor commercial; aquaculture: commercial; gamefish: yes; aquarium: public aquariums
		Cutthroat trout	Oncorhynchus clarkii (Richardson, 1836)	3.8	Fisheries: commercial; aquaculture: commercial; gamefish: yes; aquarium: public aquariums
		Ohrid trout	Salmo letnica (Karaman, 1924)	4	Fisheries: commercial; aquaculture: commercial; gamefish: yes
		/	Salmo marmoratus Cuvier, 1829	4	Fisheries: commercial; aquaculture: commercial; gamefish: yes
		Lake trout	Salvelinus namaycush (Walbaum, 1792)	4.3	Fisheries: commercial; aquaculture: commercial; gamefish: yes
		/	Salmo carpio Linnaeus, 1758	3.5	Fisheries: commercial; aquaculture: commercial
A44	Trouts nei	Sea trout	Salmo trutta Linnaeus, 1758	3.4	Fisheries: commercial; aquaculture: commercial; gamefish: yes	3.78
		Rainbow trout	Oncorhynchus mykiss (Walbaum, 1792)	4.1	Fisheries: highly commercial; aquaculture: commercial; gamefish: yes
		Brook trout	Salvelinus fontinalis (Mitchill, 1814)	3.3	Fisheries: minor commercial; aquaculture: commercial; gamefish: yes; aquarium: public aquariums
		Cutthroat trout	Oncorhynchus clarkii (Richardson, 1836)	3.8	Fisheries: commercial; aquaculture: commercial; gamefish: yes; aquarium: public aquariums
		Lake trout	Salvelinus namaycush (Walbaum, 1792)	4.3	Fisheries: commercial; aquaculture: commercial; gamefish: yes
A45	Trouts nei	Sea trout	Salmo trutta Linnaeus, 1758	3.4	Fisheries: commercial; aquaculture: commercial; gamefish: yes	3.6
		Rainbow trout	Oncorhynchus mykiss (Walbaum, 1792)	4.1	Fisheries: highly commercial; aquaculture: commercial; gamefish: yes
		Brook trout	Salvelinus fontinalis (Mitchill, 1814)	3.3	Fisheries: minor commercial; aquaculture: commercial; gamefish: yes; aquarium: public aquariums
A46	Whitefishes nei	European whitefish	Coregonus lavaretus (Linnaeus, 1758)	3.1	Fisheries: commercial; aquaculture: commercial; gamefish: yes	3.5
		Maraena whitefish	Coregonus maraena (Bloch, 1779)	3.5	Fisheries: minor commercial; aquaculture: commercial
		Peled	Coregonus peled (Gmelin, 1789)	4.1	Fisheries: commercial; aquaculture: commercial
		Humpback whitefish	Coregonus pidschian (Gmelin, 1789)	3.3	Fisheries: commercial; aquaculture: commercial
A47	Salmonoids nei	Rainbow trout	Oncorhynchus mykiss (Walbaum, 1792)	4.1	Fisheries: highly commercial; aquaculture: commercial; gamefish: yes	3.975
		Pink salmon	Oncorhynchus gorbuscha (Walbaum, 1792)	4.5	Fisheries: highly commercial; aquaculture: commercial; gamefish: yes
		Chum salmon	Oncorhynchus keta (Walbaum, 1792)	3.7	Fisheries: highly commercial; aquaculture: commercial; gamefish: yes; aquarium: public aquariums
		Masu salmon	Oncorhynchus masou (Brevoort, 1856)	3.6	Fisheries: commercial; aquaculture: commercial; gamefish: yes
